# Supplementary material for: Cross-talk between individual phenol-soluble modulins in Staphylococcus aureus biofilm enables rapid and efficient amyloid formation
Source: eLife. 2020 Dec 1;9:e59776. doi: 10.7554/eLife.59776 (PMC7732344; doi:10.7554/eLife.59776)
Supplement: Figure 1—figure supplement 2—source data 1. [file elife-59776-fig1-figsupp2-data1.xlsx]

## Sheet: Fig. S1a
		PSMα2 kinetics
				PSMα2 monomeric concentration
			Time (h)	0.05 mg/ml	0.05 mg/ml	0.05 mg/ml	0.1 mg/ml	0.1 mg/ml	0.1 mg/ml	0.25 mg/ml	0.25 mg/ml	0.25 mg/ml	0.5 mg/ml	0.5 mg/ml	0.5 mg/ml	1.0 mg/ml	1.0 mg/ml	1.0 mg/ml
			0	104	109	115	129	149	120	109	133	127	134	143	157	156	174	162
			0.166667	98	101	105	117	139	113	105	122	121	126	134	146	144	163	149
			0.333333	100	98	105	113	132	108	101	115	115	123	130	139	138	155	143
			0.5	96	95	101	107	128	107	96	115	118	122	125	137	133	153	142
			0.666667	95	92	98	110	125	106	94	115	111	120	127	135	133	153	138
			0.833333	93	94	99	108	123	105	99	111	114	115	124	137	134	152	144
			1	96	96	99	106	125	107	97	116	112	119	129	134	136	150	144
			1.16667	95	94	99	110	116	108	95	114	111	119	125	135	134	151	142
			1.33333	98	96	100	106	119	110	99	114	109	119	127	130	131	155	140
			1.5	92	97	97	108	114	106	100	114	110	122	122	134	134	156	139
			1.66667	93	92	99	111	113	105	99	117	110	118	125	135	130	159	138
			1.83333	96	95	98	109	110	108	98	111	111	120	130	135	127	167	142
			2	93	90	100	111	112	109	101	113	115	123	127	134	131	165	139
			2.16667	93	96	103	106	114	107	96	110	112	117	129	135	132	166	141
			2.33333	94	98	102	110	113	110	102	114	111	121	126	131	130	170	144
			2.5	92	98	99	105	112	112	102	110	114	114	128	134	133	166	137
			2.66667	93	96	102	107	118	111	99	114	113	121	122	136	133	158	147
			2.83333	90	91	103	107	112	106	96	112	110	123	126	135	127	161	143
			3	96	102	97	111	111	107	95	116	117	121	125	135	127	164	139
			3.16667	93	96	101	110	114	112	101	116	114	124	126	132	129	158	148
			3.33333	92	96	102	112	114	104	99	118	114	120	129	139	132	163	144
			3.5	97	91	97	105	116	107	98	111	114	120	126	133	132	161	140
			3.66667	97	99	100	108	114	106	99	112	115	123	125	136	133	162	143
			3.83333	97	93	100	107	114	110	101	110	115	122	125	134	131	163	142
			4	94	95	102	110	115	107	100	113	116	123	128	137	134	164	141
			4.16667	94	95	97	107	114	106	102	113	122	124	125	136	132	159	143
			4.33333	95	96	98	110	116	106	99	112	115	124	127	133	135	159	142
			4.5	91	95	101	109	117	106	99	115	118	124	126	133	131	157	140
			4.66667	93	94	98	109	114	106	101	115	116	123	123	131	131	165	141
			4.83333	94	95	98	108	116	108	97	113	119	123	127	135	133	167	142
			5	93	95	98	108	114	106	98	110	116	125	125	135	131	163	141
			5.16667	91	93	102	109	113	107	99	114	117	124	125	135	133	159	141
			5.33333	96	95	100	109	115	107	99	114	117	122	128	131	133	159	140
			5.5	95	95	103	110	113	107	103	111	119	126	125	135	132	159	140
			5.66667	95	91	97	106	115	107	97	110	117	123	125	134	131	160	141
			5.83333	95	95	103	110	112	107	99	113	116	122	123	135	129	161	140
			6	95	95	100	109	112	108	100	111	115	122	124	133	132	156	142
			6.16667	93	94	98	110	113	105	98	112	116	123	125	133	131	160	139
			6.33333	96	93	100	109	113	108	100	112	116	122	126	133	130	161	140
			6.5	97	98	101	108	117	108	104	113	117	122	126	133	129	158	141
			6.66667	95	94	98	110	116	107	100	109	117	124	127	133	130	160	138
			6.83333	94	95	100	107	115	106	98	113	119	124	125	133	129	161	138
			7	96	96	98	111	114	107	101	112	120	124	129	134	132	160	141
			7.16667	93	96	99	110	114	109	99	113	123	122	125	133	127	159	142
			7.33333	94	95	98	109	113	106	99	110	116	121	125	131	129	157	140
			7.5	92	92	99	108	115	107	100	113	120	124	123	136	129	159	141
			7.66667	97	96	98	109	115	107	98	112	119	125	123	132	131	159	141
			7.83333	91	93	100	109	116	106	103	115	117	123	125	134	132	162	139
			8	96	94	99	109	115	106	100	114	117	121	127	132	130	159	140
			8.16667	96	92	98	108	114	106	100	114	119	121	127	133	128	159	139
			8.33333	96	96	96	111	116	108	99	114	119	123	127	135	129	160	140
			8.5	93	94	98	109	117	106	101	112	120	123	126	135	128	162	140
			8.66667	91	94	99	111	114	103	100	110	120	121	128	136	131	159	139
			8.83333	94	95	98	109	114	104	103	110	121	124	125	137	129	158	137
			9	94	94	99	111	114	106	104	113	118	122	124	135	128	162	142
			9.16667	93	95	98	110	114	108	101	114	121	120	127	134	131	160	140
			9.33333	95	92	98	107	113	106	101	112	117	121	124	132	127	160	139
			9.5	96	96	98	111	112	105	96	114	122	120	127	132	128	160	140
			9.66667	95	96	99	109	113	103	99	114	123	123	127	132	129	160	139
			9.83333	95	96	100	109	115	107	98	113	120	121	125	132	129	160	142
			10	93	95	97	109	115	107	100	112	119	120	126	132	129	159	140
			10.1667	94	93	97	108	114	106	95	110	120	120	123	134	128	158	137
			10.3333	93	95	97	107	117	107	100	110	122	121	125	134	128	160	140
			10.5	95	96	99	109	115	110	97	111	120	122	126	135	128	160	141
			10.6667	91	94	98	110	112	106	101	112	120	119	127	132	130	160	143
			10.8333	94	93	100	109	113	107	100	113	121	120	126	131	129	159	142
			11	95	96	98	110	116	109	98	113	122	117	126	133	129	161	143
			11.1667	94	93	97	110	116	104	100	114	126	123	124	135	126	159	142
			11.3333	95	94	100	113	113	111	99	113	123	122	125	135	128	163	141
			11.5	95	95	98	110	114	108	102	112	128	119	123	132	126	161	139
			11.6667	95	92	102	110	110	107	99	113	127	121	126	133	129	160	139
			11.8333	90	94	97	110	114	108	100	114	128	117	128	131	128	161	141
			12	94	96	98	107	118	107	99	113	123	120	126	135	128	163	139
			12.1667	92	94	97	106	114	104	99	112	124	122	128	137	130	161	142
			12.3333	94	91	100	110	114	107	98	114	124	122	125	131	129	160	141
			12.5	93	95	100	112	116	106	98	111	124	122	126	131	131	159	143
			12.6667	96	95	102	109	115	108	99	115	123	121	127	132	132	160	140
			12.8333	96	94	99	107	114	107	99	114	124	124	126	134	128	162	141
			13	95	92	99	111	112	106	97	111	118	119	125	134	128	163	141
			13.1667	92	94	97	110	114	107	101	112	121	121	127	133	132	164	142
			13.3333	92	89	97	108	111	108	99	112	117	120	124	135	129	163	140
			13.5	93	94	99	110	111	107	98	113	120	120	126	131	128	161	141
			13.6667	94	97	100	108	112	108	98	115	122	122	126	133	131	164	140
			13.8333	93	95	99	110	112	107	101	112	120	120	128	132	129	160	143
			14	95	92	99	106	113	108	98	110	118	120	125	132	130	162	139
			14.1667	96	96	99	111	115	105	97	109	116	120	125	133	127	162	141
			14.3333	97	95	97	109	113	106	97	112	119	122	129	134	127	163	141
			14.5	92	93	101	108	115	107	99	112	123	119	127	136	129	162	141
			14.6667	95	91	97	108	112	109	97	109	121	120	126	134	129	161	140
			14.8333	94	95	99	110	115	108	98	113	117	119	127	134	130	163	140
			15	96	94	100	112	114	104	98	111	121	118	128	130	128	162	143
			15.1667	96	96	99	113	111	110	99	114	120	120	127	132	127	162	140
			15.3333	95	93	99	112	113	107	98	112	120	123	128	130	126	161	144
			15.5	95	96	101	109	112	105	96	111	121	117	126	134	129	165	142
			15.6667	95	96	99	109	117	106	100	110	121	120	124	136	128	160	142
			15.8333	96	93	99	110	113	107	99	114	125	121	128	131	129	162	141
			16	93	95	99	108	113	108	99	112	119	119	127	133	130	160	143
			16.1667	94	95	99	110	115	106	100	113	122	120	125	133	131	164	141
			16.3333	95	92	101	111	114	110	100	112	120	118	127	135	129	163	143
			16.5	93	94	99	108	114	107	102	114	124	120	126	131	130	160	143
			16.6667	95	95	99	111	115	108	97	113	122	122	126	131	129	165	142
			16.8333	93	91	97	109	113	105	97	115	121	118	128	134	131	166	145
			17	95	92	99	108	115	109	102	111	120	119	125	131	130	161	141
			17.1667	93	92	102	109	114	110	99	112	123	124	124	132	129	161	144
			17.3333	92	96	97	108	116	106	100	111	118	122	129	134	131	164	144
			17.5	95	97	98	109	113	108	96	114	121	121	124	133	128	163	143
			17.6667	93	93	99	112	112	108	96	113	115	116	128	131	131	163	143
			17.8333	94	95	99	109	110	108	99	112	117	120	129	133	128	164	139
			18	95	95	99	107	111	109	100	112	115	120	123	135	130	162	144
			18.1667	94	97	99	110	111	109	101	110	112	120	127	132	131	167	142
			18.3333	96	93	100	108	111	108	99	112	114	119	126	135	131	165	144
			18.5	94	94	102	110	111	106	98	112	114	119	126	133	131	161	144
			18.6667	94	97	100	111	112	106	97	114	113	118	125	134	130	161	141
			18.8333	94	96	98	113	110	106	100	112	115	121	126	134	130	163	144
			19	94	97	98	110	113	108	100	113	111	118	126	130	128	163	140
			19.1667	94	94	100	112	111	110	97	115	112	118	127	134	130	162	140
			19.3333	94	98	101	108	112	108	101	115	116	121	127	134	129	165	144
			19.5	93	95	100	107	112	110	98	114	111	120	129	136	129	166	144
			19.6667	94	95	99	113	111	106	101	108	116	119	126	131	129	164	145
			19.8333	93	95	101	107	113	107	99	112	113	117	129	136	128	163	144
			20	98	95	98	109	108	111	96	110	112	119	127	135	131	161	142
			20.1667	94	92	102	112	111	110	96	115	112	118	127	135	128	160	142
			20.3333	96	95	100	110	111	107	99	115	113	117	125	134	131	160	142
			20.5	98	94	98	108	108	107	101	114	112	120	126	133	127	162	139
			20.6667	93	93	99	111	113	107	99	111	111	118	128	132	128	161	141
			20.8333	98	95	98	108	108	111	99	111	113	117	125	133	128	162	143
			21	96	95	101	108	113	112	97	113	110	120	128	132	131	165	145
			21.1667	94	96	99	110	112	111	98	110	109	119	129	134	128	164	145
			21.3333	96	94	101	111	109	106	100	113	110	118	130	134	132	163	143
			21.5	96	93	99	107	110	105	100	115	111	121	129	132	131	159	144
			21.6667	95	96	100	109	115	107	95	112	106	117	128	129	131	161	142
			21.8333	94	97	101	109	111	107	99	111	114	122	124	134	128	163	138
			22	94	93	95	109	109	108	99	114	112	119	123	131	130	166	142
			22.1667	95	96	100	109	108	107	97	112	110	121	126	135	131	163	143
			22.3333	94	94	99	112	108	107	98	112	110	117	125	130	129	162	143
			22.5	94	96	97	111	112	108	98	117	112	120	128	132	128	163	141
			22.6667	96	95	100	110	110	111	102	112	112	120	128	131	128	161	142
			22.8333	91	94	102	108	112	108	97	113	113	120	124	128	129	161	143
			23	93	93	100	109	112	108	98	114	111	120	126	130	130	165	142
			23.1667	92	93	102	110	107	108	97	113	113	119	129	135	132	162	144
			23.3333	96	94	100	110	110	111	99	112	112	121	126	131	129	162	142
			23.5	93	95	98	108	109	107	95	111	111	122	127	133	127	163	144
			23.6667	94	97	101	111	114	106	101	113	111	120	127	133	130	162	141
			23.8333	94	93	98	111	111	109	99	114	111	123	127	134	128	162	143
			24	95	92	101	112	110	108	99	113	113	120	127	132	129	162	144
			24.1667	93	96	98	111	108	107	96	112	112	118	127	129	129	162	145
			24.3333	94	96	101	109	110	111	102	113	114	119	127	132	130	161	143
			24.5	92	96	98	110	112	109	99	116	113	120	128	131	127	162	142
			24.6667	92	93	99	107	109	107	97	109	110	117	127	135	128	161	143
			24.8333	93	92	100	110	112	107	100	112	115	120	126	131	128	163	146
			25	95	91	98	108	113	109	101	113	111	119	125	135	131	163	145
			25.1667	97	94	98	113	111	107	98	113	112	120	128	135	131	164	144
			25.3333	97	95	103	113	110	106	99	112	111	118	128	133	129	161	145
			25.5	95	94	102	111	110	107	99	112	110	121	126	135	132	164	143
			25.6667	95	96	100	107	111	107	99	112	111	121	129	134	128	164	145
			25.8333	96	94	99	112	110	109	98	114	112	118	123	132	126	161	141
			26	95	92	103	108	111	109	100	114	113	123	126	130	130	165	141
			26.1667	92	94	100	110	110	105	99	117	113	116	130	133	127	163	142
			26.3333	93	94	100	110	112	110	97	113	112	118	132	134	128	163	142
			26.5	94	94	99	111	111	107	97	113	108	118	131	131	128	162	140
			26.6667	95	95	100	110	113	111	98	112	113	123	126	132	130	161	143
			26.8333	96	98	101	110	109	107	98	113	112	119	126	128	130	162	143
			27	90	94	97	109	110	108	97	113	111	119	128	132	128	160	142
			27.1667	94	95	98	111	111	107	99	114	111	121	128	132	128	162	146
			27.3333	93	97	100	113	113	110	100	114	113	121	129	133	129	164	144
			27.5	96	93	100	110	108	110	98	111	112	119	127	133	129	164	142
			27.6667	96	95	100	109	111	110	97	112	113	118	128	133	127	162	142
			27.8333	94	94	102	108	108	110	98	112	110	118	129	137	131	166	141
			28	96	95	101	109	113	108	97	115	112	121	129	132	131	166	141
			28.1667	92	95	101	111	109	106	98	114	113	119	126	130	128	164	145
			28.3333	96	97	99	111	111	109	98	113	113	121	128	139	129	164	145
			28.5	93	94	98	109	111	105	99	113	111	119	127	132	128	161	142
			28.6667	94	95	99	110	110	108	100	111	113	121	127	132	127	162	143
			28.8333	95	91	99	111	113	107	101	113	112	122	129	133	128	161	143
			29	96	96	99	109	108	108	102	114	111	122	129	133	128	163	144
			29.1667	95	96	100	111	111	109	102	114	111	122	131	133	133	163	144
			29.3333	96	96	98	109	111	108	102	114	111	116	130	131	129	162	142
			29.5	95	96	96	109	113	108	100	116	112	119	129	132	127	161	142
			29.6667	95	94	97	112	109	108	99	112	109	120	127	136	131	161	142
			29.8333	94	94	103	111	111	108	100	114	110	117	128	130	127	161	141
			30	94	95	99	113	110	109	101	112	113	121	128	130	129	163	143
			30.1667	92	93	100	113	112	105	98	119	110	116	128	130	127	164	145
			30.3333	97	96	98	111	110	108	97	113	112	116	128	132	127	160	139
			30.5	94	92	99	109	108	108	96	115	111	118	131	131	127	165	138
			30.6667	96	92	100	110	112	107	95	114	109	119	128	130	128	155	139
			30.8333	93	95	98	111	108	107	96	112	108	120	126	131	128	165	142
			31	95	94	97	111	110	108	98	109	111	120	128	133	128	164	140
			31.1667	92	96	99	110	113	111	100	111	114	118	129	129	131	163	145
			31.3333	94	96	98	109	113	107	101	111	110	121	128	135	129	163	142
			31.5	90	94	98	113	111	108	95	116	112	120	126	133	130	161	143
			31.6667	93	95	99	109	104	104	100	110	112	118	131	134	130	163	143
			31.8333	95	95	101	110	113	109	99	110	112	119	127	134	129	166	141
			32	92	95	99	110	111	107	100	115	111	121	127	133	129	161	141
			32.1667	95	90	99	112	108	107	98	110	112	122	123	131	128	165	140
			32.3333	96	95	98	112	109	108	100	113	112	120	127	131	128	161	142
			32.5	95	95	101	110	110	109	100	116	111	119	127	132	128	163	142
			32.6667	93	95	97	112	110	108	96	112	108	119	128	136	132	161	147
			32.8333	93	95	97	112	110	108	99	115	115	119	123	132	129	164	144
			33	97	94	100	112	109	109	98	112	113	121	128	132	129	162	141
			33.1667	96	95	100	109	109	107	99	112	112	120	125	133	130	162	145
			33.3333	95	93	98	110	113	110	99	111	109	118	128	127	128	161	143
			33.5	94	94	97	108	109	108	99	111	111	118	126	131	128	160	142
			33.6667	94	93	97	110	110	109	98	112	113	120	129	132	128	163	142
			33.8333	97	91	100	111	111	111	97	112	113	119	126	130	127	162	144
			34	96	95	100	111	113	109	99	114	115	121	128	132	130	162	146
			34.1667	93	94	101	110	111	109	100	113	112	120	128	136	131	166	143
			34.3333	95	94	100	112	111	107	99	116	112	119	129	134	131	165	143
			34.5	95	92	100	109	109	106	98	115	110	122	127	129	128	165	143
			34.6667	94	93	98	109	111	109	97	112	113	120	130	133	129	160	145
			34.8333	92	92	96	110	109	105	99	110	107	118	126	130	128	161	143
			35	92	95	100	113	110	110	100	114	110	117	133	134	132	164	139
			35.1667	96	96	101	113	111	108	98	113	114	121	131	132	129	160	141
			35.3333	94	95	102	111	112	106	99	112	113	121	127	133	132	162	142
			35.5	96	95	99	108	109	110	98	112	115	121	127	131	130	165	142
			35.6667	95	96	100	109	113	106	100	115	112	118	126	131	131	166	142
			35.8333	91	93	100	109	111	108	97	112	114	119	130	131	127	167	141
			36	93	95	100	110	111	108	100	110	111	118	127	135	130	161	147
			36.1667	94	95	101	108	110	109	99	112	109	118	130	133	131	164	143
			36.3333	92	97	101	111	113	107	97	114	114	121	129	129	129	162	143
			36.5	92	97	100	110	114	109	99	113	112	121	128	133	130	166	143
			36.6667	90	96	98	112	109	106	99	112	110	118	129	133	128	161	141
			36.8333	93	96	99	111	111	106	100	111	111	121	129	132	128	158	142
			37	96	96	99	110	111	110	99	113	114	119	128	134	131	165	145
			37.1667	94	93	101	112	111	110	99	113	112	121	127	135	131	164	144
			37.3333	95	92	99	108	111	110	100	112	113	118	126	131	129	161	144
			37.5	95	95	100	107	110	110	97	114	114	120	126	130	129	165	140
			37.6667	93	97	99	111	113	110	100	114	114	117	126	135	131	164	147
			37.8333	95	98	101	110	110	108	102	115	115	119	129	131	131	164	143
			38	97	92	100	108	109	108	99	113	111	118	127	133	132	163	142
			38.1667	96	93	99	113	112	109	97	114	111	120	128	135	132	162	142
			38.3333	93	94	100	110	109	108	98	112	112	120	129	130	131	162	144
			38.5	94	95	98	113	110	107	100	111	111	117	129	132	131	163	143
			38.6667	94	93	98	109	109	108	98	112	113	119	125	129	129	162	142
			38.8333	94	95	101	111	110	107	102	112	112	121	129	132	132	163	142
			39	96	92	98	111	110	108	98	113	110	120	128	131	130	162	139
			39.1667	95	96	101	109	111	107	101	112	112	116	127	130	131	162	144
			39.3333	94	94	97	110	110	108	99	116	112	119	127	130	130	164	142
			39.5	94	95	101	115	110	109	99	112	111	119	130	131	131	164	143
			39.6667	94	95	100	112	114	111	98	112	111	117	125	132	131	165	142
			39.8333	93	93	99	111	112	107	98	109	109	117	129	129	129	162	144
			40	91	94	101	111	112	107	100	110	111	118	126	129	130	160	140
			40.1667	92	97	99	109	111	109	99	113	113	118	127	130	129	162	141
			40.3333	93	95	98	108	111	110	96	113	110	120	127	131	126	162	139
			40.5	95	94	101	110	111	108	96	115	110	117	130	132	132	164	146
			40.6667	94	91	99	111	110	109	99	112	112	119	125	129	131	164	144
			40.8333	93	93	99	109	110	108	98	112	109	118	129	129	129	160	141
			41	95	95	102	109	113	110	101	113	111	118	128	129	132	162	143
			41.1667	91	92	98	109	107	107	99	116	111	118	129	130	130	161	142
			41.3333	96	92	101	112	111	109	97	110	111	119	124	128	131	162	142
			41.5	94	95	97	112	109	109	99	115	111	120	129	131	129	163	142
			41.6667	94	93	102	107	111	107	98	112	110	119	127	130	128	164	140
			41.8333	94	96	101	112	111	107	100	112	112	119	128	130	131	160	140
			42	95	94	101	113	111	109	99	116	110	119	128	130	131	160	142
			42.1667	94	93	100	112	113	110	97	113	111	120	124	129	128	164	139
			42.3333	92	94	99	109	111	108	98	113	112	118	128	130	127	161	140
			42.5	94	95	101	110	111	104	96	112	109	115	128	130	133	164	142
			42.6667	91	94	98	110	110	106	99	110	110	119	127	134	131	159	144
			42.8333	93	95	102	111	111	107	98	113	113	117	129	132	131	161	140
			43	94	94	99	114	112	110	99	111	114	123	128	130	130	163	141
			43.1667	95	94	103	109	109	110	98	112	109	121	126	129	130	160	140
			43.3333	94	96	98	109	111	109	97	113	110	118	127	129	132	160	143
			43.5	91	92	97	114	111	109	98	111	111	115	128	130	130	159	142
			43.6667	94	92	104	112	111	108	100	113	112	120	128	129	129	162	138
			43.8333	92	92	99	109	110	109	99	113	109	116	126	131	132	158	140
			44	92	95	101	111	110	108	101	114	109	119	128	130	128	157	141
			44.1667	92	93	98	112	113	108	101	113	108	117	127	133	128	163	141
			44.3333	94	94	101	109	111	107	99	114	111	116	126	129	129	160	143
			44.5	96	93	100	112	110	109	97	113	110	120	129	127	129	161	143
			44.6667	93	93	100	111	109	107	100	110	111	117	123	133	132	162	142
			44.8333	95	95	99	110	112	109	101	113	110	117	126	130	130	164	140
			45	93	92	100	113	110	110	100	114	111	117	125	131	129	157	141
			45.1667	96	93	101	110	109	107	101	111	111	116	124	128	131	161	141
			45.3333	95	93	101	114	111	106	98	112	110	118	127	132	130	159	142
			45.5	91	92	104	112	114	108	100	114	111	118	126	131	129	161	143
			45.6667	93	95	101	112	108	107	101	111	112	121	128	128	127	161	143
			45.8333	93	96	101	112	112	107	100	111	111	119	129	128	127	161	141
			46	95	95	102	110	111	108	100	116	109	119	123	129	131	163	142
			46.1667	94	95	97	108	112	108	100	115	111	118	127	131	132	163	143
			46.3333	92	94	100	108	112	108	98	112	112	118	127	129	130	162	142
			46.5	100	92	100	114	112	109	99	113	108	118	125	131	130	159	142
			46.6667	91	93	102	111	111	107	100	112	112	119	128	131	130	161	141
			46.8333	94	96	103	111	114	108	99	113	110	118	127	132	128	161	143
			47	96	93	101	110	110	107	101	113	110	117	129	128	128	161	140
			47.1667	93	95	99	110	112	110	98	114	110	118	124	129	129	161	146
			47.3333	95	94	99	109	110	107	98	114	111	121	129	131	130	162	141
			47.5	96	95	100	114	114	110	101	114	111	120	126	129	133	162	144
			47.6667	95	94	102	109	114	109	97	112	109	118	127	127	128	159	141
			47.8333	89	94	101	110	110	108	102	111	110	118	128	130	129	158	142
			48	93	94	100	112	111	111	102	116	110	119	125	128	128	160	142
			48.1667	95	94	102	114	113	111	100	114	112	117	127	130	131	160	143
			48.3333	91	94	99	109	112	108	98	111	111	117	124	129	129	162	140
			48.5	94	95	100	114	112	109	101	111	110	119	130	127	129	160	139
			48.6667	91	93	97	112	112	108	100	111	111	118	128	130	127	158	143
			48.8333	93	92	100	115	113	108	100	113	109	117	128	129	129	161	142
			49	93	93	101	113	111	109	100	113	110	118	125	129	132	159	142
			49.1667	95	92	103	110	113	108	102	110	112	119	125	129	128	162	144
			49.3333	95	93	102	112	109	109	99	112	111	117	125	132	127	158	139
			49.5	94	95	101	111	113	111	98	114	110	115	128	128	131	159	141
			49.6667	93	95	102	111	113	110	100	113	110	117	129	132	131	160	139
			49.8333	94	92	100	110	111	108	100	112	112	115	127	130	129	158	138
			50	92	94	102	111	113	109	95	113	112	116	126	129	127	161	141
			50.1667	94	94	99	111	112	104	100	112	106	118	127	130	127	161	142
			50.3333	95	93	102	110	111	107	99	113	109	115	127	128	129	157	146
			50.5	94	96	101	113	110	107	100	111	112	118	128	128	129	159	141
			50.6667	91	93	101	112	112	105	98	111	111	119	125	131	130	159	143
			50.8333	95	95	104	111	112	109	101	115	111	120	127	127	126	160	144
			51	91	90	105	111	111	108	98	114	111	116	128	130	132	162	139
			51.1667	93	96	104	109	108	108	99	110	109	117	123	129	126	157	144
			51.3333	92	94	98	112	112	108	101	113	109	118	126	130	127	159	142
			51.5	92	97	99	111	112	107	99	113	114	119	128	130	127	160	143
			51.6667	93	93	101	110	109	109	98	110	110	122	127	128	128	157	141
			51.8333	92	93	103	113	111	110	97	111	113	122	128	129	130	160	144
			52	95	97	101	118	112	109	103	113	112	121	127	132	126	158	144
			52.1667	94	96	98	111	111	109	97	113	115	119	125	131	126	162	141
			52.3333	94	92	99	112	112	108	96	112	110	118	127	129	132	160	140
			52.5	96	95	100	108	109	109	100	112	112	119	127	127	128	163	144
			52.6667	95	92	99	111	110	110	101	114	109	119	127	131	127	160	142
			52.8333	93	93	101	110	110	107	99	111	112	115	126	127	126	161	142
			53	93	90	101	109	112	108	98	111	112	121	128	127	128	161	137
			53.1667	92	95	102	117	112	109	102	112	110	119	127	130	131	160	145
			53.3333	95	94	102	109	108	109	100	113	111	115	128	131	128	159	141
			53.5	94	94	101	108	109	106	96	111	112	115	126	128	131	160	141
			53.6667	93	93	99	111	110	105	99	115	110	119	125	131	129	160	143
			53.8333	97	98	104	113	111	106	99	115	110	119	128	130	130	159	140
			54	95	93	102	115	110	107	98	115	109	118	127	126	129	156	140
			54.1667	92	94	105	108	109	108	96	115	111	117	126	132	129	159	141
			54.3333	92	96	102	113	113	109	97	115	111	119	126	129	132	158	141
			54.5	94	98	103	111	110	109	100	111	110	118	125	130	134	160	143
			54.6667	94	94	98	111	110	108	101	112	108	120	127	130	130	156	142
			54.8333	94	94	102	110	108	108	101	112	108	121	129	129	128	161	137
			55	95	91	101	110	108	107	99	113	107	118	126	127	128	157	143
			55.1667	91	92	99	114	111	108	99	111	111	118	130	128	130	161	143
			55.3333	92	93	98	109	112	108	100	110	109	115	127	131	131	159	145
			55.5	91	95	102	112	112	109	97	114	109	121	127	129	130	156	140
			55.6667	97	96	100	109	111	107	96	116	108	119	128	126	131	160	143
			55.8333	95	94	101	111	112	107	98	112	111	116	125	128	130	161	145
			56	94	93	101	110	111	109	100	115	109	118	126	130	129	160	141
			56.1667	94	89	102	110	112	110	97	111	110	116	126	131	125	162	145
			56.3333	95	96	103	113	111	112	100	111	111	119	124	127	130	159	143
			56.5	93	91	102	111	113	112	100	111	113	116	125	129	130	163	143
			56.6667	94	91	100	115	109	107	100	114	112	122	130	130	127	157	142
			56.8333	94	91	101	108	108	108	99	110	108	117	128	127	127	159	143
			57	93	92	100	111	110	108	100	111	110	117	124	130	128	160	145
			57.1667	94	92	104	111	112	108	101	113	108	121	121	130	127	160	143
			57.3333	93	91	103	110	108	111	97	116	110	120	128	130	128	157	148
			57.5	92	94	97	113	112	104	100	111	110	114	127	129	130	160	145
			57.6667	97	94	98	110	110	110	101	111	111	119	124	128	129	158	147
			57.8333	96	92	103	111	110	109	97	108	111	116	128	130	130	159	147
			58	92	93	102	114	111	104	99	114	110	117	126	131	128	157	149
			58.1667	94	91	101	110	108	110	99	115	109	116	127	132	128	159	148
			58.3333	93	91	102	113	111	104	101	109	109	118	124	127	132	162	148
			58.5	93	95	102	111	112	110	99	114	110	120	127	130	131	163	150
			58.6667	90	94	101	109	108	108	98	113	111	119	126	129	132	161	148
			58.8333	94	94	102	109	110	107	100	115	110	115	125	126	127	160	152
			59	92	94	103	111	110	109	98	116	110	119	123	129	127	159	149
			59.1667	95	95	98	115	113	109	97	112	111	120	128	130	130	158	150
			59.3333	93	95	102	112	110	109	100	114	107	115	126	128	127	160	151
			59.5	93	93	102	111	109	106	99	113	108	117	127	131	129	157	149
			59.6667	93	95	100	110	108	107	99	114	111	121	129	128	128	157	154
			59.8333	93	95	104	110	111	109	100	114	112	118	127	130	129	157	152
			60	95	92	103	112	111	109	98	114	111	119	126	131	127	160	150
			60.1667	92	94	101	109	111	110	100	113	110	119	125	132	129	160	154
			60.3333	92	94	102	110	108	110	100	113	109	115	128	129	129	161	151
			60.5	95	94	102	114	108	109	102	114	110	118	128	130	129	162	153
			60.6667	93	96	102	113	113	109	100	114	112	120	129	131	132	162	156
			60.8333	95	96	101	109	110	110	101	113	112	119	126	129	129	161	155
			61	93	94	101	112	110	108	98	113	106	119	123	129	128	159	152
			61.1667	92	91	103	111	109	107	101	111	108	116	128	129	131	160	152
			61.3333	93	92	101	113	112	109	103	114	111	117	127	130	128	162	153
			61.5	92	92	103	114	110	107	102	111	110	118	127	132	129	160	158
			61.6667	94	97	105	114	114	110	101	113	110	122	127	131	130	165	157
			61.8333	91	95	101	110	112	108	103	111	112	120	126	130	130	158	155
			62	95	92	103	113	110	110	103	113	110	119	126	131	130	160	154
			62.1667	93	94	104	113	113	107	100	112	111	116	127	133	129	158	157
			62.3333	98	95	104	111	112	109	99	113	108	119	127	129	129	161	157
			62.5	94	93	101	114	110	108	103	110	111	119	127	131	132	159	155
			62.6667	94	93	102	112	110	108	102	113	110	120	128	132	128	161	155
			62.8333	94	93	105	111	110	109	102	113	107	119	128	130	131	157	158
			63	94	94	100	113	112	106	102	115	110	118	126	133	130	160	158
			63.1667	97	96	103	111	112	110	102	114	113	118	126	132	129	165	156
			63.3333	93	92	105	112	110	109	99	112	110	119	126	128	128	159	153
			63.5	94	95	100	111	112	106	106	116	109	121	126	132	133	163	158
			63.6667	93	93	101	114	112	109	97	115	110	118	127	133	130	162	159
			63.8333	94	91	102	113	111	109	102	113	107	119	127	133	131	157	155
			64	92	92	103	114	112	112	100	112	109	117	127	130	129	156	157
			64.1667	95	94	106	114	111	109	101	113	112	121	128	131	130	162	159
			64.3333	95	95	105	111	113	111	101	113	113	118	130	132	129	158	157
			64.5	93	95	102	109	109	106	101	112	109	118	126	134	129	161	159
			64.6667	94	95	101	113	115	110	98	116	109	119	129	129	129	161	155
			64.8333	97	95	104	114	109	108	100	113	110	119	127	129	129	158	160
			65	95	93	103	111	109	111	102	116	111	121	129	130	132	161	160
			65.1667	94	94	106	113	107	110	106	113	108	118	127	130	131	159	160
			65.3333	92	95	106	112	113	109	103	113	113	118	127	131	128	160	158
			65.5	94	93	103	113	110	108	102	114	110	117	125	130	127	159	157
			65.6667	94	94	106	113	110	111	101	114	114	125	126	132	130	160	160
			65.8333	95	94	105	115	110	108	103	109	110	118	128	131	132	162	157
			66	91	95	102	110	111	108	100	114	108	119	127	132	131	161	158
			66.1667	94	94	106	115	109	107	99	116	110	117	129	131	133	158	161
			66.3333	95	95	103	113	111	110	102	115	109	121	128	130	129	159	158
			66.5	94	92	105	113	109	109	102	115	111	117	127	131	130	162	158
			66.6667	96	94	102	114	109	111	101	112	113	117	129	129	131	161	160
			66.8333	94	92	106	113	108	109	100	115	109	115	128	131	129	158	156
			67	94	94	103	115	112	112	103	113	112	120	127	132	129	157	159
			67.1667	94	94	106	111	112	107	100	115	112	117	126	128	130	160	158
			67.3333	95	94	106	111	112	108	100	113	111	118	125	127	127	161	158
			67.5	94	93	102	113	112	110	102	113	110	124	128	130	132	161	160
			67.6667	95	94	104	115	109	110	102	112	111	116	130	132	131	162	154
			67.8333	93	93	101	112	111	108	100	114	112	118	127	132	130	159	159
			68	95	92	103	111	110	108	99	113	112	116	127	131	132	162	160
			68.1667	93	97	106	113	115	112	102	117	113	121	125	132	131	161	161
			68.3333	96	95	105	112	112	112	102	113	112	118	126	131	133	160	159
			68.5	92	95	105	114	109	109	101	115	110	121	128	131	131	157	161
			68.6667	94	95	104	111	113	110	101	112	112	119	126	132	130	159	160
			68.8333	94	93	106	114	112	111	102	114	112	119	125	131	130	161	159
			69	93	96	106	113	111	108	101	115	109	119	127	131	131	160	163
			69.1667	93	95	105	113	112	111	102	114	109	119	130	133	130	159	160
			69.3333	94	96	104	113	109	109	105	114	113	119	129	133	131	160	161
			69.5	95	94	105	114	112	109	103	113	112	118	130	131	130	160	163
			69.6667	93	94	103	113	112	109	103	113	111	120	130	132	131	158	158
			69.8333	95	93	104	114	113	109	100	113	110	120	128	129	128	161	161
			70	94	95	105	111	112	110	101	114	112	121	127	130	131	165	161
			70.1667	96	94	104	110	110	111	103	114	107	121	130	133	129	159	162
			70.3333	96	96	103	111	112	111	101	117	110	119	130	132	132	161	158
			70.5	93	93	107	112	109	108	100	116	109	116	128	129	132	159	160
			70.6667	93	96	103	112	111	113	103	115	109	119	126	132	129	164	160
			70.8333	92	93	104	113	111	108	103	113	111	119	132	132	126	160	158
			71	95	94	104	111	110	109	101	114	111	119	127	134	131	161	162
			71.1667	94	93	107	114	110	113	105	113	112	119	126	132	134	166	162
			71.3333	93	97	107	110	109	110	103	112	113	119	128	130	129	159	160
			71.5	97	95	108	112	110	111	104	114	112	121	128	132	129	163	158
			71.6667	93	93	104	111	112	111	104	115	110	119	128	132	132	161	159
			71.8333	91	98	105	112	112	110	103	115	109	120	129	131	131	159	163
			72	94	95	105	112	111	112	104	115	112	119	128	130	129	161	161
			72.1667	94	94	106	111	111	110	103	118	110	123	128	132	131	159	165
			72.3333	92	94	105	113	114	110	103	117	110	118	128	132	129	162	161
			72.5	89	94	104	111	110	109	105	117	111	123	129	133	131	164	163
			72.6667	96	95	104	115	112	109	102	115	114	119	125	132	130	159	162
			72.8333	96	96	107	116	112	110	102	112	112	118	126	130	131	159	157
			73	93	94	106	113	114	110	104	118	109	120	129	130	131	165	162
			73.1667	92	96	106	112	113	111	103	116	112	116	129	135	132	158	161
			73.3333	93	95	106	114	114	111	102	115	114	120	130	131	130	163	163
			73.5	94	95	106	114	111	111	102	116	111	120	130	135	132	160	161
			73.6667	96	92	103	112	110	110	101	116	111	120	128	129	129	162	164
			73.8333	95	92	106	111	113	115	103	116	110	117	126	133	129	161	161
			74	97	95	106	110	112	111	102	115	111	122	129	132	128	160	161
			74.1667	93	91	105	115	111	111	102	115	111	118	130	130	133	159	160
			74.3333	95	95	104	116	111	111	104	118	113	123	131	130	128	160	159
			74.5	91	93	106	112	110	113	104	115	112	122	130	134	129	162	164
			74.6667	94	97	109	111	114	107	103	116	108	119	128	133	131	159	163
			74.8333	98	97	109	114	115	112	103	115	112	120	126	133	130	160	162
			75	92	92	103	114	112	110	103	117	109	119	129	135	128	163	164
			75.1667	94	92	104	111	110	110	100	116	113	122	132	133	130	164	159
			75.3333	91	93	104	113	112	111	101	116	110	118	131	134	132	161	164
			75.5	95	93	105	115	111	110	104	119	110	120	128	133	130	161	160
			75.6667	92	97	103	111	111	110	101	117	110	118	127	133	129	160	161
			75.8333	92	94	106	111	111	108	103	114	110	120	129	133	128	159	160
			76	94	92	105	113	109	108	102	115	108	121	129	129	128	159	163
			76.1667	96	95	105	112	111	110	103	115	112	121	131	132	129	158	164
			76.3333	94	96	106	112	113	108	101	117	109	119	132	132	130	161	164
			76.5	93	92	105	112	110	111	105	116	112	122	130	132	131	160	159
			76.6667	94	93	105	115	114	112	104	115	111	119	126	133	131	162	163
			76.8333	92	93	105	115	108	108	103	117	111	117	125	133	130	160	164
			77	96	93	105	118	113	114	104	117	112	120	126	128	129	160	163
			77.1667	93	93	107	113	109	109	104	118	109	119	128	130	131	162	164
			77.3333	96	94	105	114	111	110	106	114	111	123	130	132	129	158	163
			77.5	93	93	105	115	113	108	102	117	110	120	129	130	130	160	160
			77.6667	95	94	104	114	114	110	106	120	110	119	126	131	132	159	158
			77.8333	93	92	104	113	111	108	103	114	110	117	127	132	128	160	160
			78	94	93	106	116	112	113	104	118	114	117	128	131	130	163	163
			78.1667	92	95	105	113	112	111	104	116	111	119	126	130	131	160	164
			78.3333	95	94	106	112	108	109	105	118	109	117	127	132	130	159	160
			78.5	96	94	104	113	115	110	105	119	110	121	131	135	131	161	160
			78.6667	92	96	101	111	108	110	101	118	111	118	128	131	131	159	161
			78.8333	96	95	104	114	112	113	106	118	114	119	129	132	133	159	162
			79	96	94	104	114	112	111	104	119	111	118	124	133	130	157	162
			79.1667	94	94	102	114	110	110	102	115	109	119	127	134	128	158	163
			79.3333	94	94	107	111	110	110	105	119	111	119	129	132	131	161	165
			79.5	92	96	104	116	111	110	102	115	112	118	128	131	128	160	162
			79.6667	93	94	109	114	110	112	105	116	113	118	130	136	131	161	162
			79.8333	97	97	106	112	113	111	106	116	112	117	125	131	130	161	167
			80	94	94	106	113	112	110	105	118	108	118	132	132	130	162	163
			80.1667	95	94	102	113	109	112	107	118	110	122	128	129	131	159	163
			80.3333	96	92	105	116	114	111	101	115	109	118	128	131	130	163	160
			80.5	95	95	106	112	110	112	103	114	111	119	128	132	132	160	160
			80.6667	97	93	104	113	115	111	106	118	112	120	131	132	128	160	161
			80.8333	93	96	104	113	113	112	105	116	112	118	127	134	132	158	164
			81	94	93	107	114	113	108	105	115	109	118	128	131	131	161	161
			81.1667	97	96	105	113	113	111	105	115	109	119	129	137	132	162	162
			81.3333	95	94	106	113	111	112	108	115	110	122	130	132	132	161	164
			81.5	94	95	105	113	113	112	108	114	111	119	131	131	129	162	162
			81.6667	97	98	107	116	111	110	107	119	113	119	129	134	131	163	165
			81.8333	95	96	106	117	111	111	105	115	109	120	127	130	131	159	162
			82	95	95	104	115	113	113	106	119	108	121	128	129	129	162	166
			82.1667	96	95	105	114	112	109	104	120	112	120	129	132	131	161	164
			82.3333	94	95	107	114	113	110	106	115	111	120	129	133	129	162	166
			82.5	95	94	107	112	111	110	106	117	112	118	130	132	131	159	162
			82.6667	94	94	106	116	113	110	107	116	114	117	130	131	129	164	163
			82.8333	94	94	105	110	114	110	107	116	109	119	130	132	128	158	163
			83	95	93	107	114	113	114	106	116	110	121	131	131	130	159	166
			83.1667	97	95	106	114	112	111	107	119	111	120	128	134	132	161	164
			83.3333	96	95	108	114	114	114	110	120	111	119	128	132	134	164	168
			83.5	96	97	105	114	113	113	106	114	110	118	129	134	131	160	162
			83.6667	96	96	105	115	111	112	106	116	111	119	131	132	132	162	165
			83.8333	95	93	105	114	109	113	106	118	112	120	131	131	131	161	163
			84	94	94	110	114	114	112	107	118	110	121	130	134	133	165	164
			84.1667	97	92	105	115	113	111	108	117	109	121	128	132	131	164	163
			84.3333	94	93	105	115	114	111	108	116	111	120	128	132	129	159	167
			84.5	95	96	106	111	110	111	111	115	111	120	126	131	131	163	162
			84.6667	92	93	106	113	111	112	109	116	107	121	128	134	129	163	166
			84.8333	95	93	105	115	111	111	110	114	111	121	128	131	130	161	163
			85	95	95	106	114	116	110	109	115	109	121	134	131	132	163	166
			85.1667	96	95	106	110	112	112	108	118	109	121	130	133	131	162	165
			85.3333	97	95	105	115	113	111	109	114	111	120	131	133	131	161	168
			85.5	96	92	106	115	113	111	106	118	111	118	131	131	130	161	163
			85.6667	95	97	105	117	112	110	110	117	110	120	128	131	132	162	166
			85.8333	95	94	107	116	113	110	107	120	109	119	132	133	131	161	164
			86	94	95	108	113	112	111	108	119	111	122	128	131	129	160	165
			86.1667	96	95	107	114	112	110	110	118	113	118	130	133	131	159	166
			86.3333	97	96	108	111	110	113	108	120	111	121	131	133	132	161	164
			86.5	93	95	105	114	111	111	106	118	112	122	127	133	135	161	165
			86.6667	93	96	105	116	113	112	111	117	111	119	129	136	132	159	163
			86.8333	93	96	106	116	110	111	111	118	109	121	130	132	133	160	165
			87	97	94	107	111	112	110	108	117	111	120	130	132	134	158	164
			87.1667	96	95	108	115	112	111	111	120	115	121	133	134	132	162	166
			87.3333	98	94	107	113	112	113	112	119	112	121	131	133	133	162	167
			87.5	97	93	108	114	113	113	113	120	114	121	129	133	131	163	165
			87.6667	96	93	107	112	113	112	111	118	111	120	130	132	133	158	168
			87.8333	97	94	106	117	113	111	112	119	114	121	127	132	132	159	165
			88	95	94	105	114	113	112	111	118	109	120	130	134	134	162	165
			88.1667	93	94	105	116	114	114	110	120	112	119	130	137	132	162	164
			88.3333	95	93	106	115	112	109	111	118	113	118	131	133	133	158	163
			88.5	94	95	109	118	114	112	112	120	111	123	130	132	132	164	167
			88.6667	95	96	108	114	111	112	112	119	112	118	131	131	130	162	169
			88.8333	97	96	111	116	112	110	109	119	111	120	131	133	132	160	164
			89	96	96	107	115	114	113	112	120	110	121	129	134	132	164	170
			89.1667	96	95	105	115	111	113	112	116	110	119	132	131	132	158	167
			89.3333	97	95	105	114	117	113	113	117	110	120	129	134	133	162	163
			89.5	94	98	108	118	111	113	116	118	111	122	131	132	132	161	166
			89.6667	95	96	110	116	114	112	108	120	111	119	131	134	132	162	168
			89.8333	95	95	107	110	111	112	111	121	112	121	128	135	131	157	166
			90	94	94	109	115	113	114	110	120	112	120	131	133	131	163	167
			90.1667	97	96	107	114	113	112	111	120	114	120	131	136	132	160	164
			90.3333	95	94	106	113	112	111	111	118	113	119	130	130	130	160	167
			90.5	97	97	108	118	114	115	111	120	112	121	131	135	134	162	167
			90.6667	95	96	110	114	111	111	113	119	109	122	128	135	134	161	166
			90.8333	94	96	108	112	115	116	112	121	111	121	132	133	132	164	167
			91	93	95	107	112	112	116	109	120	109	121	132	134	133	162	166
			91.1667	95	94	105	114	112	114	115	119	109	120	133	135	132	161	166
			91.3333	98	96	107	116	114	113	114	118	112	120	131	132	132	160	168
			91.5	99	92	108	116	116	113	114	118	108	118	130	134	133	161	165
			91.6667	98	96	109	115	115	111	114	120	114	119	132	136	131	160	162
			91.8333	97	96	109	117	116	114	113	122	115	122	131	135	132	161	166
			92	97	96	109	115	110	113	114	118	113	121	131	134	131	163	167
			92.1667	97	96	107	115	114	113	113	121	112	122	131	132	129	163	166
			92.3333	98	96	107	112	113	110	114	121	112	118	131	132	132	163	165
			92.5	95	94	105	116	111	113	115	116	111	119	131	132	134	159	168
			92.6667	95	93	106	115	114	113	116	121	110	119	134	134	133	160	168
			92.8333	97	97	109	116	113	113	114	115	109	121	131	134	133	161	169
			93	96	94	107	117	112	115	115	118	112	117	134	129	133	161	166
			93.1667	96	95	104	113	115	112	111	123	112	121	130	133	131	161	167
			93.3333	96	97	108	117	113	111	117	117	113	121	132	132	130	159	166
			93.5	98	95	108	119	114	116	115	120	111	121	131	135	132	158	165
			93.6667	92	95	110	116	113	116	113	119	113	119	131	132	133	160	167

## Sheet: Fig. S1b
PSMα4 kinetics
		PSMα4 monomeric concentration
	Time (h)	0.05 mg/ml	0.05 mg/ml	0.05 mg/ml	0.1 mg/ml	0.1 mg/ml	0.1 mg/ml	0.25 mg/ml	0.25 mg/ml	0.25 mg/ml	0.5 mg/ml	0.5 mg/ml	0.5 mg/ml	1.0 mg/ml	1.0 mg/ml	1.0 mg/ml
	0	142	149	145	184	184	181	252	250	264	351	348	356	401	410	403
	0.166667	137	143	138	174	174	168	241	244	253	340	337	343	384	397	391
	0.333333	135	139	136	168	174	167	243	245	251	331	334	344	382	391	384
	0.5	136	139	131	170	170	166	241	245	252	336	334	346	385	393	388
	0.666667	133	141	134	171	173	165	245	247	256	339	341	345	387	394	390
	0.833333	134	135	136	169	171	169	247	250	261	345	343	351	393	398	395
	1	134	135	132	168	174	171	252	251	263	346	353	358	402	402	399
	1.16667	133	138	133	162	170	167	259	257	265	354	357	362	403	416	411
	1.33333	137	140	138	166	177	166	264	263	272	359	365	364	409	422	414
	1.5	137	140	138	166	176	168	266	264	275	368	370	376	420	425	420
	1.66667	134	140	136	167	174	173	274	267	278	366	376	376	426	433	428
	1.83333	138	139	137	168	179	174	274	273	282	371	377	382	428	441	431
	2	138	142	136	174	173	172	280	273	280	374	385	387	436	447	437
	2.16667	136	142	138	174	168	174	281	278	285	375	387	390	435	448	435
	2.33333	136	145	139	177	165	174	281	279	286	384	388	395	442	455	444
	2.5	137	141	137	177	166	172	285	282	286	385	391	400	447	459	442
	2.66667	140	143	139	180	169	172	284	285	288	386	397	399	447	456	445
	2.83333	140	143	136	180	174	173	288	288	293	391	399	404	452	459	454
	3	140	143	138	180	173	173	286	288	292	389	401	404	460	466	452
	3.16667	138	143	137	182	177	172	292	289	298	398	405	410	458	467	455
	3.33333	141	141	142	188	179	177	292	293	298	401	411	410	459	475	463
	3.5	140	142	137	185	183	175	292	292	300	401	407	417	463	477	466
	3.66667	140	144	139	185	183	179	290	293	300	405	418	425	469	478	466
	3.83333	143	145	138	185	186	178	295	291	298	407	412	420	470	481	469
	4	139	144	143	187	184	178	295	299	301	406	415	429	473	487	475
	4.16667	142	148	139	188	191	179	296	300	303	414	424	426	473	487	475
	4.33333	140	146	138	189	190	179	300	299	306	412	422	431	478	492	477
	4.5	143	145	139	189	191	187	300	297	306	410	423	430	480	495	480
	4.66667	142	148	139	192	194	182	304	301	306	414	426	434	486	500	486
	4.83333	140	147	140	193	192	186	304	301	306	418	428	436	490	496	487
	5	140	145	141	190	194	183	303	300	313	413	431	446	492	504	493
	5.16667	141	146	139	191	193	185	305	305	314	428	437	446	489	508	496
	5.33333	145	150	143	194	199	185	304	303	309	433	436	449	493	507	498
	5.5	140	146	139	193	194	186	306	303	311	435	440	448	498	511	502
	5.66667	139	150	141	192	196	184	311	307	311	436	438	455	497	512	500
	5.83333	143	150	142	196	198	184	307	310	316	440	440	456	506	515	505
	6	146	151	142	194	197	188	312	309	313	442	446	454	508	519	509
	6.16667	143	152	141	196	200	190	310	307	321	448	444	462	506	521	511
	6.33333	144	149	140	197	198	186	312	310	318	450	450	462	509	525	513
	6.5	143	154	143	196	200	189	310	312	320	451	447	463	510	531	514
	6.66667	144	150	142	198	201	188	315	309	322	455	450	466	514	526	519
	6.83333	145	155	142	200	200	188	313	311	323	453	457	468	513	529	523
	7	148	155	146	199	202	191	317	316	327	459	460	471	515	530	523
	7.16667	147	155	142	201	200	193	318	316	323	463	457	472	520	530	523
	7.33333	148	156	143	200	205	193	322	316	328	456	456	475	520	534	530
	7.5	145	155	146	199	204	193	316	318	324	464	461	477	521	536	533
	7.66667	141	157	145	205	204	194	321	317	327	464	464	477	524	539	534
	7.83333	150	157	146	203	205	191	320	317	330	466	461	483	524	545	538
	8	151	157	142	202	205	194	321	321	328	472	464	484	528	543	543
	8.16667	146	156	148	202	209	192	322	324	327	474	468	482	535	544	543
	8.33333	151	159	147	204	206	192	328	323	329	477	468	490	538	547	544
	8.5	150	156	144	203	208	197	325	324	328	476	470	487	537	552	545
	8.66667	148	163	148	202	206	199	326	321	336	483	471	487	540	548	544
	8.83333	149	162	146	208	211	199	319	329	331	480	473	491	538	555	549
	9	149	162	147	207	208	199	327	326	334	486	475	490	537	554	552
	9.16667	150	161	143	205	214	202	329	327	340	487	481	492	543	554	551
	9.33333	151	165	149	208	206	199	327	323	336	484	478	493	545	556	555
	9.5	150	164	150	206	211	201	326	330	335	489	481	491	547	558	563
	9.66667	158	164	151	211	213	205	333	329	341	493	483	500	549	558	559
	9.83333	150	160	152	214	212	203	333	333	340	495	481	499	555	561	558
	10	153	168	146	205	211	203	332	329	339	496	485	499	544	563	563
	10.1667	151	158	156	213	215	198	331	329	342	497	484	507	555	569	563
	10.3333	157	168	152	211	216	204	334	333	336	495	489	502	555	569	569
	10.5	154	163	149	216	215	201	332	331	346	496	488	499	559	569	571
	10.6667	152	161	149	213	216	207	335	332	341	503	496	505	557	581	570
	10.8333	160	167	151	211	216	205	332	332	339	499	491	511	566	569	567
	11	158	168	153	215	216	204	334	331	346	507	495	513	566	583	571
	11.1667	154	165	150	215	213	208	336	337	347	505	498	513	563	576	573
	11.3333	158	169	154	214	216	206	338	338	345	506	495	512	565	586	580
	11.5	158	167	152	217	216	208	338	337	346	508	496	511	562	585	581
	11.6667	157	170	156	216	214	209	337	338	351	511	498	512	563	591	583
	11.8333	162	171	154	218	220	212	338	339	349	508	498	515	562	589	582
	12	160	171	158	218	217	211	341	341	350	509	503	508	566	593	581
	12.1667	160	173	156	218	216	209	340	336	350	509	507	516	573	589	581
	12.3333	163	171	158	216	222	210	343	338	354	515	503	520	579	589	585
	12.5	160	176	157	221	220	209	342	341	351	519	508	519	570	594	590
	12.6667	162	177	156	216	219	210	342	341	354	518	505	526	571	595	586
	12.8333	162	172	159	220	219	212	343	339	348	516	506	521	575	597	593
	13	162	174	160	219	217	214	346	345	350	518	508	528	584	596	591
	13.1667	164	176	161	218	221	212	347	344	354	521	507	524	582	599	592
	13.3333	162	177	160	221	220	214	344	345	356	521	512	524	581	601	594
	13.5	165	175	161	220	226	216	344	345	354	522	505	526	585	605	595
	13.6667	164	180	161	221	223	213	345	349	360	529	513	530	585	604	601
	13.8333	166	178	164	222	223	216	348	346	357	525	513	531	585	606	603
	14	165	179	159	226	228	212	348	351	356	525	514	530	587	602	601
	14.1667	167	177	162	225	221	214	346	350	357	528	514	529	592	608	605
	14.3333	170	181	162	226	223	213	350	349	360	531	516	530	587	613	603
	14.5	167	178	164	223	225	221	353	351	362	525	517	534	593	608	611
	14.6667	168	182	164	220	227	217	355	351	360	528	518	530	596	611	607
	14.8333	171	180	165	226	226	216	352	351	360	530	521	537	593	614	612
	15	169	182	166	225	229	222	350	351	361	528	516	537	598	615	609
	15.1667	174	184	165	228	228	221	351	352	362	531	523	538	597	613	613
	15.3333	172	185	167	231	231	219	354	351	364	534	521	535	600	616	612
	15.5	173	184	168	227	232	220	356	353	364	532	524	536	602	617	611
	15.6667	171	186	169	231	229	221	357	351	366	535	526	539	599	617	620
	15.8333	169	186	164	230	227	226	355	353	365	539	527	542	600	617	616
	16	176	186	169	228	230	224	358	356	365	542	527	546	601	618	618
	16.1667	175	186	169	230	229	221	358	355	368	542	535	539	605	616	623
	16.3333	175	190	171	229	233	225	360	358	366	543	533	542	606	620	628
	16.5	176	186	172	229	232	220	357	361	370	543	528	542	604	625	627
	16.6667	178	190	169	230	233	221	360	363	369	545	535	549	607	628	624
	16.8333	174	189	172	229	234	224	356	358	371	545	532	542	610	629	630
	17	180	192	177	230	232	225	361	360	372	548	528	544	609	632	626
	17.1667	175	191	171	230	235	226	359	356	367	550	535	548	606	630	625
	17.3333	179	190	177	232	235	226	361	360	371	547	539	552	608	635	631
	17.5	177	188	175	239	234	225	361	364	372	550	540	549	618	636	633
	17.6667	179	194	176	232	237	224	362	363	373	546	539	551	614	635	632
	17.8333	177	192	175	233	236	230	365	360	373	547	538	551	617	638	632
	18	182	193	175	236	239	226	364	362	372	548	545	550	621	643	639
	18.1667	178	196	173	238	237	228	362	358	375	549	537	550	623	637	635
	18.3333	181	195	176	237	235	229	367	362	374	551	539	556	621	639	637
	18.5	183	194	178	238	239	227	366	363	374	556	545	553	620	643	634
	18.6667	183	197	178	232	237	230	365	363	373	555	542	557	624	646	642
	18.8333	183	201	175	236	242	230	368	365	373	553	543	562	626	647	640
	19	183	197	175	237	239	230	371	365	376	563	545	556	627	646	640
	19.1667	186	198	180	239	239	229	368	365	376	560	542	556	633	652	641
	19.3333	186	200	182	236	238	233	369	365	376	557	547	560	626	649	646
	19.5	184	195	181	240	241	230	370	369	377	557	546	561	629	650	645
	19.6667	186	197	176	236	243	234	367	367	383	560	549	557	636	654	645
	19.8333	189	199	180	239	242	230	368	369	380	563	547	563	633	646	647
	20	185	198	182	240	242	233	370	369	377	560	552	563	635	654	645
	20.1667	187	203	184	241	241	235	371	367	381	564	554	565	641	656	650
	20.3333	189	203	184	242	246	238	370	371	381	565	549	568	639	660	652
	20.5	187	202	184	243	245	238	374	372	381	566	552	567	638	659	650
	20.6667	189	204	184	242	245	237	370	370	383	565	557	568	641	658	652
	20.8333	191	202	183	242	243	237	375	373	384	568	552	565	642	662	654
	21	190	203	184	246	247	239	375	369	384	560	557	565	635	672	655
	21.1667	194	201	184	240	242	238	378	372	380	564	557	563	644	662	658
	21.3333	189	202	183	245	245	238	372	371	383	566	556	571	643	661	661
	21.5	191	202	186	247	248	239	373	370	383	570	556	570	647	666	656
	21.6667	193	206	187	246	248	239	377	376	383	573	558	570	644	661	662
	21.8333	187	202	189	242	245	240	376	374	390	576	559	569	636	668	663
	22	191	204	190	242	249	242	378	373	385	567	560	576	650	668	660
	22.1667	191	201	188	243	249	239	376	373	387	575	563	571	646	673	662
	22.3333	193	204	188	244	248	241	380	376	385	572	555	574	651	676	659
	22.5	192	204	192	249	250	244	382	374	386	576	565	570	651	676	667
	22.6667	190	207	189	245	249	243	379	376	386	579	562	570	647	674	666
	22.8333	195	207	189	249	246	242	378	379	383	577	562	577	649	679	673
	23	196	207	193	246	245	241	381	378	393	580	566	578	652	679	666
	23.1667	199	206	192	248	247	241	382	376	392	577	567	577	658	675	672
	23.3333	198	208	188	246	251	245	382	377	389	581	565	574	655	680	670
	23.5	196	207	189	248	250	244	385	379	391	577	573	578	652	681	671
	23.6667	193	209	191	248	253	245	381	380	391	583	569	576	657	678	677
	23.8333	196	209	192	251	252	243	386	382	388	582	570	577	661	684	674
	24	196	210	193	248	251	247	383	384	389	579	569	578	663	681	675
	24.1667	196	212	192	250	253	247	385	382	391	583	569	581	663	680	672
	24.3333	196	208	196	248	257	251	385	388	395	580	570	576	663	681	673
	24.5	200	212	193	252	255	245	386	383	389	584	570	582	662	684	676
	24.6667	200	211	194	253	257	248	384	380	394	587	570	581	662	687	673
	24.8333	200	212	194	252	257	251	389	382	396	589	571	582	672	686	680
	25	200	212	197	256	253	249	386	386	396	588	576	586	667	684	681
	25.1667	203	212	200	254	255	250	385	384	395	588	575	588	663	687	684
	25.3333	203	215	198	252	254	247	385	385	401	589	578	588	663	688	679
	25.5	204	215	200	256	256	253	388	383	398	588	579	586	674	682	676
	25.6667	203	216	201	257	258	251	388	384	394	588	575	589	676	690	679
	25.8333	201	212	198	254	257	249	388	385	395	589	578	585	672	690	677
	26	200	220	200	259	259	254	390	384	398	587	577	587	675	691	680
	26.1667	203	210	195	258	260	256	388	383	395	592	582	587	672	690	682
	26.3333	206	212	200	256	259	254	395	386	401	594	583	588	675	696	684
	26.5	207	219	203	256	258	255	391	390	400	592	579	588	678	691	690
	26.6667	204	218	203	260	262	256	388	391	403	598	585	590	679	701	681
	26.8333	204	215	200	258	262	254	392	386	401	594	583	592	679	697	690
	27	206	220	201	257	262	258	390	387	404	591	587	592	683	690	691
	27.1667	204	217	204	258	262	254	389	391	404	594	590	591	681	693	691
	27.3333	203	218	201	261	263	255	394	390	405	597	587	593	679	698	695
	27.5	204	220	205	261	263	254	392	390	400	594	584	592	686	694	690
	27.6667	208	219	205	256	267	256	395	392	405	597	590	597	681	693	697
	27.8333	205	216	205	259	263	260	393	392	408	606	589	601	683	694	694
	28	208	221	205	264	263	256	395	394	406	603	589	598	684	696	694
	28.1667	210	216	206	260	263	260	396	396	405	598	587	596	683	697	698
	28.3333	209	220	202	261	266	260	400	394	407	603	591	600	688	698	701
	28.5	207	221	204	264	267	260	397	391	410	600	589	597	694	699	704
	28.6667	210	217	206	263	268	262	401	400	408	604	591	605	698	697	709
	28.8333	207	221	207	263	265	264	401	394	405	607	590	600	694	699	709
	29	210	218	208	261	269	261	397	396	406	605	588	598	690	703	704
	29.1667	213	224	209	268	271	261	400	403	409	603	593	603	690	704	718
	29.3333	210	219	208	263	266	261	401	401	411	610	597	606	689	708	718
	29.5	213	226	212	264	269	260	403	396	410	605	594	605	693	708	719
	29.6667	208	221	211	265	270	260	403	399	408	605	602	602	698	708	718
	29.8333	212	222	209	265	270	263	404	403	412	615	602	604	692	710	717
	30	215	228	209	269	269	265	401	404	409	606	605	610	690	710	714
	30.1667	211	222	210	268	273	265	404	401	408	616	600	613	688	705	719
	30.3333	215	225	213	271	273	264	407	404	413	609	605	611	688	707	724
	30.5	215	223	212	266	274	263	407	400	415	615	607	610	687	712	723
	30.6667	213	227	211	267	268	263	403	399	413	610	606	605	690	709	729
	30.8333	211	224	212	269	270	265	401	406	418	611	608	614	691	712	725
	31	215	226	214	268	274	267	404	410	415	610	605	610	694	715	726
	31.1667	213	227	214	267	273	268	406	403	419	613	605	613	689	712	729
	31.3333	220	229	212	269	274	270	409	403	414	614	609	614	693	711	728
	31.5	216	229	212	272	273	271	408	408	415	617	606	611	692	712	735
	31.6667	217	227	217	272	278	267	407	406	419	618	612	614	698	716	728
	31.8333	217	229	217	273	275	270	407	406	422	621	605	614	695	718	737
	32	216	229	220	274	276	271	409	411	420	617	611	616	699	717	736
	32.1667	219	227	216	273	277	269	408	406	413	622	607	613	702	718	734
	32.3333	222	229	223	271	276	272	414	409	417	618	618	620	705	723	740
	32.5	223	230	218	274	278	270	413	411	420	618	614	618	703	722	740
	32.6667	220	230	220	272	280	272	410	403	417	623	618	623	702	722	740
	32.8333	221	231	220	271	278	273	413	413	419	617	620	618	708	730	731
	33	223	233	222	276	278	273	415	412	419	620	615	623	705	728	740
	33.1667	222	232	218	271	278	273	414	410	421	624	620	623	711	728	735
	33.3333	222	231	221	276	278	273	411	410	422	624	612	620	708	728	739
	33.5	221	228	222	274	277	275	414	411	421	622	620	621	707	730	738
	33.6667	221	235	222	276	283	272	411	409	419	620	618	629	709	729	732
	33.8333	221	234	222	277	283	278	413	412	424	618	620	622	708	731	728
	34	222	234	222	272	281	274	416	414	422	624	619	626	711	735	728
	34.1667	224	235	222	279	283	276	413	413	426	626	613	626	713	735	725
	34.3333	224	233	227	277	279	275	415	410	421	628	621	625	717	739	719
	34.5	223	234	222	279	283	278	419	412	423	624	622	623	716	738	722
	34.6667	225	234	224	279	284	276	418	413	422	629	622	624	715	738	721
	34.8333	223	236	226	283	278	276	418	416	428	629	625	631	718	743	712
	35	227	232	225	279	287	277	419	406	428	627	628	632	717	743	709
	35.1667	224	234	223	279	281	285	421	415	426	628	627	628	722	742	714
	35.3333	223	238	229	281	286	279	415	417	429	629	628	632	721	744	701
	35.5	227	235	227	282	285	280	420	421	425	630	622	628	723	754	703
	35.6667	226	235	227	281	284	276	418	414	431	632	629	628	724	747	704
	35.8333	230	238	231	284	288	279	424	423	434	634	627	634	725	748	707
	36	227	240	233	281	290	284	424	420	430	633	630	630	727	749	705
	36.1667	228	236	229	283	285	286	421	417	429	635	629	635	726	753	704
	36.3333	227	238	231	279	287	283	422	420	434	629	634	632	727	746	705
	36.5	225	238	232	283	288	286	415	416	426	632	627	629	732	747	700
	36.6667	227	238	233	284	287	286	421	421	432	637	632	635	735	749	705
	36.8333	228	240	233	283	290	285	423	424	436	635	638	637	734	749	705
	37	227	239	231	283	287	285	424	424	435	638	630	641	727	752	706
	37.1667	230	236	233	282	287	286	428	422	434	638	636	631	735	755	710
	37.3333	228	242	231	286	292	285	425	424	433	639	635	635	732	753	709
	37.5	230	241	236	286	292	288	427	424	436	639	637	639	731	754	713
	37.6667	229	240	235	286	291	285	428	425	434	635	636	639	734	758	712
	37.8333	232	240	234	287	293	286	429	429	434	637	638	642	735	762	709
	38	232	242	234	286	294	287	428	425	437	642	636	638	735	760	710
	38.1667	231	244	235	287	293	286	425	427	438	641	634	643	740	759	706
	38.3333	234	239	235	288	292	289	424	426	437	641	636	641	740	756	715
	38.5	234	245	233	287	293	288	427	426	435	642	637	644	743	758	712
	38.6667	231	245	236	290	294	287	422	426	431	642	646	643	743	760	712
	38.8333	235	243	236	289	294	292	423	425	434	641	639	641	739	753	708
	39	233	245	236	285	291	289	427	424	439	641	641	640	741	754	708
	39.1667	234	242	236	288	296	286	419	425	432	637	634	641	736	757	707
	39.3333	231	244	236	292	292	287	427	425	437	641	638	643	732	756	706
	39.5	233	242	234	286	295	291	422	426	436	641	639	641	731	753	707
	39.6667	235	244	237	288	296	288	427	425	437	643	645	641	739	758	708
	39.8333	232	246	238	287	296	289	428	431	440	647	639	648	737	759	705
	40	236	246	239	290	295	293	426	425	442	645	639	644	745	763	709
	40.1667	234	247	242	289	298	289	430	424	441	649	639	643	743	763	713
	40.3333	234	246	239	291	296	292	430	425	443	646	644	648	743	765	712
	40.5	232	251	242	294	296	292	433	430	441	644	646	647	736	766	715
	40.6667	233	242	239	291	295	296	431	425	440	644	644	647	742	765	717
	40.8333	236	244	240	292	297	293	429	424	441	648	648	646	743	764	715
	41	240	243	244	292	299	294	435	429	441	649	646	645	744	762	713
	41.1667	237	248	243	291	300	294	432	429	442	653	643	656	751	767	716
	41.3333	237	249	243	293	302	294	429	429	444	649	648	652	746	768	718
	41.5	237	249	243	293	301	293	433	430	446	649	650	652	744	768	723
	41.6667	242	250	241	291	300	296	430	432	446	655	646	650	746	767	720
	41.8333	239	248	241	295	298	294	428	429	445	655	650	656	748	771	721
	42	238	247	245	292	298	296	428	429	443	648	650	657	752	770	725
	42.1667	239	250	245	297	299	298	433	432	442	650	654	650	753	770	723
	42.3333	240	248	242	295	301	301	438	434	445	654	655	654	749	775	723
	42.5	240	254	243	295	300	301	435	437	449	654	652	655	754	778	725
	42.6667	239	252	244	300	300	303	431	435	453	655	655	653	752	769	727
	42.8333	244	252	248	299	303	300	435	436	448	656	651	659	756	777	732
	43	238	254	245	297	298	301	439	436	451	652	649	655	751	773	734
	43.1667	241	254	246	298	305	303	435	438	450	653	657	659	752	778	728
	43.3333	239	253	250	297	305	302	438	436	450	656	654	661	753	775	720
	43.5	241	253	248	302	307	301	438	436	449	656	652	655	755	776	725
	43.6667	239	254	248	298	304	301	434	437	450	660	654	659	757	778	731
	43.8333	240	256	249	301	306	306	443	440	452	655	656	662	754	781	723
	44	242	255	247	303	306	303	439	436	453	658	661	666	748	779	732
	44.1667	242	258	250	303	306	301	433	438	450	665	657	659	753	782	736
	44.3333	246	257	252	299	308	302	440	440	457	663	661	659	756	788	728
	44.5	245	256	251	301	310	305	440	437	455	664	661	666	756	785	728
	44.6667	242	253	249	304	308	305	437	439	453	661	663	663	759	778	734
	44.8333	242	257	251	305	308	306	440	440	455	663	658	662	758	784	731
	45	242	256	252	305	310	306	445	442	455	667	661	668	763	780	733
	45.1667	247	256	254	303	309	311	438	441	456	664	663	661	758	786	734
	45.3333	244	258	250	305	311	313	443	438	455	663	666	673	761	783	737
	45.5	248	258	251	302	311	308	443	440	457	660	662	667	761	784	729
	45.6667	249	261	255	303	311	314	444	446	458	668	669	670	760	789	735
	45.8333	247	263	256	303	311	310	442	444	456	667	664	670	760	788	737
	46	249	256	254	304	309	310	442	444	462	668	665	668	760	791	739
	46.1667	244	261	257	304	317	308	444	440	463	669	663	665	761	789	736
	46.3333	243	258	254	306	313	312	445	441	461	664	664	669	764	792	737
	46.5	248	265	255	305	314	309	443	447	457	672	668	674	767	792	739
	46.6667	249	263	257	308	313	310	445	446	462	668	664	675	764	795	736
	46.8333	251	262	256	308	316	315	447	444	460	672	671	673	772	793	738
	47	248	261	257	308	318	311	449	444	460	670	666	678	772	794	734
	47.1667	249	261	256	310	320	311	446	441	463	672	667	679	771	801	742
	47.3333	250	263	257	308	317	318	450	444	459	669	665	675	766	796	744
	47.5	249	263	255	309	320	314	446	446	466	674	674	676	766	801	744
	47.6667	251	261	257	313	316	312	451	449	460	670	674	673	771	798	750
	47.8333	253	263	259	312	320	315	451	451	460	679	669	677	769	800	747
	48	256	263	259	312	319	318	449	449	463	672	673	680	775	799	747
	48.1667	252	264	260	311	318	322	451	448	469	673	670	682	773	795	743
	48.3333	258	262	259	311	319	315	458	449	467	677	668	685	776	802	755
	48.5	253	265	260	316	324	320	456	453	470	676	674	682	776	803	752
	48.6667	256	267	263	312	323	319	449	452	468	670	672	683	777	800	751
	48.8333	257	264	259	314	324	317	451	451	467	673	674	684	772	801	755
	49	253	270	264	315	321	323	457	451	468	676	679	685	779	804	756
	49.1667	253	267	264	316	321	321	450	456	469	677	676	682	777	801	759
	49.3333	254	266	265	320	320	322	453	454	469	676	678	685	779	802	759
	49.5	257	269	264	317	325	323	458	451	469	676	678	689	784	809	755
	49.6667	257	265	265	318	326	321	455	456	469	678	679	689	785	806	755
	49.8333	254	267	266	319	326	326	454	451	474	677	677	686	786	805	758
	50	260	268	267	320	327	325	454	453	468	678	680	684	786	808	756
	50.1667	259	270	262	317	325	327	459	454	472	682	679	689	791	806	757
	50.3333	258	268	266	319	330	326	461	451	477	682	679	684	791	808	755
	50.5	259	270	268	318	327	328	457	454	473	683	678	689	790	809	764
	50.6667	259	272	265	317	327	331	458	456	473	683	676	683	786	806	767
	50.8333	260	270	265	318	330	329	457	458	475	688	679	686	787	812	766
	51	256	269	267	324	329	330	459	458	472	683	686	693	784	811	767
	51.1667	259	272	270	324	328	333	457	455	472	684	688	692	792	812	767
	51.3333	261	267	266	320	333	329	457	458	469	683	684	693	791	810	764
	51.5	264	269	272	324	332	331	459	456	476	684	685	697	790	815	762
	51.6667	260	273	268	327	329	331	459	460	477	686	682	697	789	816	771
	51.8333	264	274	269	326	335	334	456	457	472	686	683	692	789	818	772
	52	262	270	266	326	330	330	461	456	476	684	687	693	790	812	771
	52.1667	268	268	269	325	330	331	461	456	480	688	689	700	792	817	774
	52.3333	263	273	269	323	332	339	459	459	477	687	684	694	794	814	775
	52.5	264	271	267	326	337	332	465	458	483	689	685	700	798	814	780
	52.6667	265	272	270	329	336	337	460	461	481	686	687	693	798	820	780
	52.8333	267	272	269	326	335	335	465	467	477	688	688	700	799	815	778
	53	266	276	270	332	337	335	462	459	480	688	690	695	795	825	776
	53.1667	265	272	271	331	336	334	463	465	480	688	690	696	792	819	778
	53.3333	263	278	275	324	339	341	466	465	482	692	689	698	799	821	776
	53.5	266	275	270	326	336	341	466	465	482	692	684	701	793	823	780
	53.6667	267	276	275	332	335	342	471	460	483	687	690	701	796	823	783
	53.8333	268	274	275	330	339	341	465	464	479	693	689	704	801	823	779
	54	262	277	270	331	336	342	468	467	481	692	689	701	796	824	784
	54.1667	268	276	273	331	343	339	470	463	487	693	692	701	799	824	781
	54.3333	267	275	276	333	338	340	470	467	482	691	698	699	800	825	781
	54.5	272	275	274	335	339	339	470	465	488	693	689	705	796	825	784
	54.6667	267	275	274	333	344	342	469	467	485	696	695	706	796	826	787
	54.8333	268	275	273	333	343	341	469	467	488	697	693	707	802	825	785
	55	268	279	277	336	341	343	476	467	484	696	697	707	802	830	789
	55.1667	269	281	278	335	341	346	471	471	489	700	695	711	805	829	790
	55.3333	268	278	276	337	344	345	474	467	490	701	699	702	802	832	789
	55.5	273	278	274	334	344	343	468	468	493	695	694	710	799	833	789
	55.6667	270	281	274	337	346	344	471	468	491	697	698	709	807	831	791
	55.8333	271	279	275	333	341	345	473	473	488	702	697	710	800	830	795
	56	274	278	277	341	347	344	473	468	489	693	698	714	809	826	798
	56.1667	270	279	278	335	344	346	473	467	487	700	701	711	804	835	787
	56.3333	272	283	275	341	345	348	478	471	490	700	699	710	805	834	795
	56.5	272	280	278	341	350	353	473	472	485	702	699	707	808	831	797
	56.6667	272	278	280	339	346	348	477	473	494	700	704	713	804	834	794
	56.8333	269	279	278	341	344	351	475	472	492	697	702	708	808	836	787
	57	273	281	279	344	349	353	474	475	492	697	698	712	804	835	800
	57.1667	274	279	281	343	350	349	474	474	490	698	701	712	800	832	799
	57.3333	275	280	278	342	351	350	483	472	496	702	703	716	806	832	795
	57.5	277	283	278	342	351	351	479	473	494	702	702	713	810	839	798
	57.6667	275	285	281	343	351	355	480	475	494	705	704	719	810	839	802
	57.8333	275	281	283	344	350	354	480	478	495	706	703	713	809	839	798
	58	275	281	279	342	349	353	475	476	492	706	699	713	803	843	803
	58.1667	275	283	281	346	351	356	477	476	499	703	702	717	807	834	809
	58.3333	274	282	284	348	351	361	481	477	500	708	704	713	809	841	809
	58.5	278	285	281	348	353	359	478	480	500	713	702	721	817	841	808
	58.6667	277	284	284	348	356	357	484	480	499	707	705	728	805	845	809
	58.8333	279	285	280	343	356	362	481	479	497	706	704	719	817	845	816
	59	275	283	280	348	354	363	482	476	497	707	712	726	816	842	817
	59.1667	279	286	282	349	355	364	483	482	500	707	709	719	810	851	810
	59.3333	278	285	283	351	354	362	482	482	500	713	706	723	815	845	815
	59.5	280	288	285	350	355	361	487	482	500	713	710	719	817	846	816
	59.6667	276	285	284	348	357	361	488	484	504	710	712	722	817	848	815
	59.8333	280	287	284	346	353	365	483	478	502	714	709	728	816	852	811
	60	279	289	283	353	360	359	488	484	503	717	715	721	818	850	818
	60.1667	279	287	283	352	358	361	488	483	507	710	715	727	819	851	820
	60.3333	281	288	285	354	358	364	489	484	507	710	713	725	819	849	821
	60.5	280	291	283	355	361	363	490	484	504	714	716	726	816	857	822
	60.6667	285	290	283	351	358	366	489	484	504	721	715	728	817	852	815
	60.8333	281	289	289	355	364	365	489	489	507	716	719	724	820	850	829
	61	282	284	287	352	363	369	487	484	507	712	718	727	822	848	820
	61.1667	283	288	286	355	364	366	490	487	504	718	714	728	824	857	828
	61.3333	283	289	284	357	365	368	493	483	508	725	720	732	820	855	829
	61.5	283	289	285	355	364	366	490	490	506	717	712	730	819	852	823
	61.6667	283	288	285	353	365	371	492	488	506	720	715	732	823	857	826
	61.8333	283	288	289	359	364	370	490	484	508	719	721	735	820	857	830
	62	283	291	288	355	366	373	492	489	510	719	712	730	826	855	827
	62.1667	280	291	287	358	366	372	494	489	505	719	722	729	820	859	833
	62.3333	281	291	290	358	370	373	494	488	509	720	719	736	828	864	835
	62.5	284	289	290	355	369	372	490	493	507	726	717	734	827	861	830
	62.6667	286	293	289	359	367	374	493	495	511	719	721	729	830	857	834
	62.8333	282	288	287	361	365	372	491	490	511	720	719	730	830	857	836
	63	282	293	289	362	367	374	500	493	511	724	719	734	829	858	837
	63.1667	282	288	288	360	368	371	494	488	509	724	719	735	830	856	833
	63.3333	287	290	292	360	371	377	497	491	516	721	724	736	831	861	831
	63.5	287	289	290	364	372	375	493	495	512	722	718	736	833	862	834
	63.6667	284	289	290	368	372	377	498	493	514	724	723	733	831	868	835
	63.8333	289	290	289	367	373	379	496	496	514	726	716	739	836	866	839
	64	283	296	291	369	369	381	499	494	520	729	727	737	836	872	838
	64.1667	287	295	291	366	374	380	497	496	511	723	718	740	836	863	847
	64.3333	288	293	291	366	372	382	497	498	518	729	723	741	832	869	846
	64.5	287	292	287	366	375	381	499	497	513	728	725	739	840	871	843
	64.6667	285	294	291	370	374	383	501	491	515	730	729	737	834	870	841
	64.8333	287	296	291	370	373	383	501	502	520	731	727	740	838	871	850
	65	287	293	292	368	377	384	502	497	517	730	732	736	837	869	844
	65.1667	286	294	293	368	374	383	505	497	518	729	732	743	843	866	846
	65.3333	287	294	289	369	373	383	500	500	514	729	733	746	837	866	848
	65.5	290	294	293	369	377	386	504	500	523	731	733	742	837	871	847
	65.6667	289	298	294	373	383	382	500	502	525	734	733	744	836	874	848
	65.8333	292	294	291	374	378	385	505	503	522	732	733	746	844	874	847
	66	290	296	291	375	381	388	509	502	524	727	733	745	848	880	850
	66.1667	290	299	294	371	376	386	505	496	523	729	734	747	847	877	851
	66.3333	293	297	293	373	380	385	506	504	520	738	728	745	849	881	854
	66.5	291	296	293	370	380	388	506	502	524	737	737	751	848	880	851
	66.6667	291	297	297	372	379	391	508	507	522	739	737	749	853	875	859
	66.8333	294	298	296	375	384	390	509	506	529	736	736	748	853	879	858
	67	293	297	295	375	384	391	508	504	524	741	733	751	855	878	855
	67.1667	296	296	296	372	380	393	514	504	530	743	740	748	855	887	857
	67.3333	291	298	299	374	387	393	511	508	528	742	739	754	859	885	861
	67.5	293	298	295	375	385	390	516	506	526	736	739	751	859	878	862
	67.6667	294	296	299	377	384	395	509	507	533	743	744	748	865	880	866
	67.8333	295	295	299	377	387	395	508	505	530	740	740	747	862	882	862
	68	295	300	295	374	385	398	511	510	530	742	740	752	862	887	863
	68.1667	291	298	299	380	393	393	514	513	534	748	744	754	868	889	869
	68.3333	293	299	298	378	384	395	513	512	531	743	742	757	863	886	870
	68.5	293	297	294	380	386	392	511	512	534	745	746	760	864	883	873
	68.6667	290	298	297	384	388	396	513	511	533	745	752	752	876	892	873
	68.8333	294	297	298	379	393	398	514	513	532	745	743	755	869	890	876
	69	293	300	298	379	388	394	516	518	531	744	748	757	865	887	877
	69.1667	294	299	296	382	389	400	514	510	528	748	748	759	868	886	870
	69.3333	296	300	299	384	394	398	518	509	531	745	743	759	875	887	869
	69.5	296	303	297	383	389	402	521	515	538	752	746	756	874	892	877
	69.6667	296	299	301	384	398	400	523	513	532	746	748	760	872	888	877
	69.8333	298	302	299	379	391	401	523	513	533	749	745	762	871	890	875
	70	294	300	299	385	393	397	520	514	544	750	749	763	870	889	879
	70.1667	295	301	300	385	392	397	522	515	534	755	747	763	877	893	879
	70.3333	298	298	300	389	394	404	519	518	540	750	750	767	878	895	878
	70.5	298	300	300	385	396	408	518	518	541	749	752	758	878	896	880
	70.6667	295	302	301	387	395	401	521	517	538	752	752	762	877	896	880
	70.8333	298	300	303	389	399	403	527	518	539	752	750	764	875	895	887
	71	296	302	300	389	395	401	522	519	540	756	752	767	883	900	888
	71.1667	300	300	298	389	397	407	522	518	540	755	750	764	877	898	881
	71.3333	298	305	303	390	395	404	525	520	542	752	752	762	875	904	890
	71.5	298	303	301	388	397	411	527	523	539	758	759	766	873	896	887
	71.6667	299	304	300	390	400	406	521	519	539	757	755	763	870	896	884
	71.8333	298	306	303	393	400	408	523	519	540	755	760	767	870	902	892
	72	298	304	300	390	393	404	525	521	546	757	758	767	872	902	891
	72.1667	300	306	303	390	402	413	529	523	543	756	760	766	879	899	890
	72.3333	302	302	304	389	397	410	523	524	542	755	756	764	870	902	894
	72.5	300	303	302	394	396	408	527	523	544	756	759	767	876	908	892
	72.6667	301	305	302	393	401	415	525	525	543	759	758	771	880	905	899
	72.8333	300	308	302	393	402	410	524	530	541	760	756	769	875	908	898
	73	302	307	302	395	401	412	528	528	545	760	758	767	876	901	897
	73.1667	300	307	305	398	403	412	529	525	548	758	765	770	875	902	897
	73.3333	299	305	303	396	403	413	528	529	543	759	758	773	878	906	898
	73.5	301	306	307	393	408	412	531	527	547	766	758	776	883	911	904
	73.6667	300	308	305	396	404	414	532	525	551	764	756	768	881	906	901
	73.8333	300	308	300	392	404	412	527	524	544	761	761	771	878	906	900
	74	301	306	306	398	406	417	531	524	550	760	765	777	880	911	902
	74.1667	305	306	305	398	406	414	533	525	548	768	764	777	883	911	896
	74.3333	300	308	308	400	412	418	534	527	549	757	765	777	884	913	902
	74.5	304	305	306	395	408	420	529	525	550	759	761	775	885	909	903
	74.6667	302	309	309	406	401	416	536	534	552	762	765	769	882	911	906
	74.8333	305	307	305	399	406	415	530	532	548	759	758	779	882	912	906
	75	302	309	306	401	407	417	536	536	550	762	764	780	886	914	910
	75.1667	301	310	305	402	407	422	532	531	550	766	767	776	887	909	911
	75.3333	303	309	307	400	408	418	536	534	554	772	760	776	888	909	908
	75.5	302	310	308	403	410	421	535	532	549	758	765	776	889	913	911
	75.6667	304	312	304	402	410	419	538	535	557	768	761	784	894	914	912
	75.8333	303	307	308	402	411	429	536	532	552	768	760	781	888	915	905
	76	305	310	307	401	411	422	541	531	552	770	763	779	887	914	909
	76.1667	306	307	309	401	414	423	537	531	550	766	771	780	891	914	907
	76.3333	304	308	311	406	408	423	537	537	556	775	766	786	880	912	904
	76.5	302	308	310	406	412	420	537	525	556	773	767	784	889	918	911
	76.6667	305	310	308	405	413	424	539	533	553	770	762	784	887	920	911
	76.8333	309	311	310	409	415	425	537	539	553	772	770	785	902	919	913
	77	307	311	309	409	415	424	538	536	558	771	771	789	905	918	912
	77.1667	304	308	311	405	415	425	541	537	556	770	764	784	904	913	913
	77.3333	307	310	310	408	414	427	541	535	557	775	773	785	902	921	916
	77.5	306	309	309	409	411	428	542	535	557	769	769	782	906	921	917
	77.6667	308	311	309	408	414	429	541	536	556	775	771	786	905	923	917
	77.8333	307	315	309	410	417	425	543	535	560	773	774	784	905	923	917
	78	308	311	312	408	417	425	545	538	560	778	780	786	907	922	919
	78.1667	308	315	309	406	416	430	546	541	563	774	773	783	908	921	916
	78.3333	306	312	313	413	419	430	545	539	560	773	775	793	899	924	926
	78.5	306	312	309	413	417	432	548	544	560	781	775	785	907	927	923
	78.6667	305	317	311	411	418	432	543	538	560	774	773	790	903	914	921
	78.8333	308	311	314	414	418	429	547	538	559	780	770	786	909	924	923
	79	306	315	312	411	422	430	543	544	563	778	770	791	909	928	924
	79.1667	306	314	316	416	423	433	549	542	572	779	774	793	909	923	923
	79.3333	307	313	311	414	419	432	546	544	562	778	776	789	905	923	926
	79.5	309	313	313	417	420	434	547	542	565	771	774	789	904	926	925
	79.6667	310	313	315	414	421	436	548	544	568	782	776	792	911	936	927
	79.8333	310	316	314	416	424	437	550	541	566	782	778	792	915	925	929
	80	307	313	312	414	426	433	546	544	566	771	776	793	909	927	932
	80.1667	311	313	313	418	420	434	552	543	565	778	777	798	914	928	930
	80.3333	310	316	313	413	419	433	550	546	563	778	773	791	921	934	932
	80.5	312	315	310	419	423	437	550	544	566	778	778	793	916	933	930
	80.6667	311	313	313	418	425	439	550	546	568	779	777	791	912	932	925
	80.8333	308	313	313	416	428	435	553	546	569	782	784	798	918	929	939
	81	309	319	315	419	429	439	554	547	565	781	781	801	919	934	934
	81.1667	310	318	313	419	429	437	554	548	571	784	786	802	922	935	930
	81.3333	311	315	316	416	427	439	552	548	568	784	784	802	926	936	933
	81.5	312	313	318	418	424	439	553	555	566	786	786	796	918	936	932
	81.6667	312	316	313	423	426	438	554	546	571	783	779	797	921	936	934
	81.8333	310	315	313	424	425	440	552	549	568	785	787	799	920	935	939
	82	313	320	313	424	428	439	554	550	571	787	782	803	926	941	931
	82.1667	311	319	317	421	425	440	554	549	569	786	783	799	923	938	937
	82.3333	310	312	315	425	428	443	556	553	574	784	785	797	928	938	936
	82.5	315	312	312	419	429	443	556	549	574	785	789	804	926	938	936
	82.6667	310	313	317	419	428	443	556	552	576	789	787	802	929	936	940
	82.8333	312	316	316	424	430	443	560	550	573	782	782	803	924	937	933
	83	313	316	315	423	430	445	559	549	575	785	784	802	928	934	935
	83.1667	313	314	315	429	432	446	555	551	570	781	789	804	924	942	939
	83.3333	313	317	316	427	431	438	557	552	574	788	787	801	921	941	937
	83.5	309	319	315	426	432	446	564	551	574	791	786	805	930	939	941
	83.6667	312	321	314	424	429	444	563	556	580	785	789	802	932	942	938
	83.8333	317	317	317	423	432	444	561	554	576	789	788	807	930	941	938
	84	312	316	317	427	430	448	559	555	579	790	793	806	929	943	941
	84.1667	313	317	318	424	431	444	563	558	573	785	791	808	932	945	945
	84.3333	313	319	315	433	436	452	565	557	576	792	791	812	929	944	946
	84.5	313	315	316	423	437	449	564	557	581	797	791	809	931	944	947
	84.6667	314	318	317	429	434	449	561	557	577	791	789	811	932	945	948
	84.8333	314	318	319	425	435	450	568	561	579	794	791	807	936	948	946
	85	315	321	315	428	435	448	569	558	581	793	793	810	934	947	942
	85.1667	318	321	322	433	435	445	564	561	580	793	794	811	933	941	951
	85.3333	313	318	320	429	437	449	567	562	588	795	792	811	936	951	956
	85.5	314	323	317	433	440	451	571	562	584	796	797	817	935	948	947
	85.6667	313	318	323	434	439	447	567	559	582	798	795	814	940	949	956
	85.8333	315	320	317	433	437	455	572	561	582	796	797	812	937	950	952
	86	321	322	319	433	439	449	570	562	582	795	796	813	935	950	949
	86.1667	318	318	323	433	443	450	571	565	583	802	793	818	939	953	947
	86.3333	318	322	325	433	442	455	573	569	585	799	796	817	939	954	956
	86.5	321	323	317	436	443	457	574	565	589	799	795	820	942	947	952
	86.6667	314	323	320	431	437	454	571	568	590	805	797	817	937	954	956
	86.8333	318	318	321	433	436	457	575	560	587	798	802	817	941	955	956
	87	318	318	322	437	437	455	571	567	590	804	801	814	939	954	959
	87.1667	316	322	322	435	438	455	575	567	589	793	800	821	941	952	961
	87.3333	319	320	317	433	439	456	574	569	588	804	799	814	945	956	949
	87.5	318	321	322	436	441	457	571	565	593	804	804	817	950	959	961
	87.6667	317	318	320	435	444	457	573	566	589	797	807	820	949	956	958
	87.8333	317	326	323	436	443	459	577	561	589	803	801	824	946	950	962
	88	317	321	321	442	445	464	573	568	591	802	803	816	950	960	963
	88.1667	318	323	323	442	445	464	574	570	590	800	806	822	945	960	965
	88.3333	322	321	326	443	450	457	580	568	592	807	807	824	955	961	965
	88.5	319	322	321	439	449	463	580	573	598	809	805	822	949	969	965
	88.6667	324	323	325	443	449	460	574	572	595	805	808	828	952	962	966
	88.8333	319	321	320	440	448	461	580	576	590	808	808	828	952	968	967
	89	326	321	326	441	447	463	578	571	590	805	809	827	946	967	968
	89.1667	323	326	325	445	448	462	583	573	601	806	806	826	956	963	969
	89.3333	322	326	325	444	453	466	583	573	596	809	807	833	951	969	974
	89.5	321	328	322	441	454	466	582	574	600	806	807	823	956	961	971
	89.6667	321	326	327	447	444	463	585	578	599	815	810	825	954	963	964
	89.8333	320	324	326	443	450	466	584	577	602	808	809	834	956	968	967
	90	324	325	325	445	455	465	586	578	597	811	809	829	956	969	971
	90.1667	325	326	329	445	448	468	587	577	604	814	809	831	957	965	973
	90.3333	325	325	325	446	453	470	591	577	604	812	811	830	954	971	979
	90.5	323	325	325	448	454	466	587	579	601	813	813	829	958	973	974
	90.6667	325	327	328	449	451	468	587	579	604	813	815	837	961	971	969
	90.8333	324	326	330	445	455	470	590	585	604	814	813	838	960	971	977
	91	322	329	327	446	456	468	592	585	599	813	815	833	967	971	969
	91.1667	324	331	327	450	456	468	595	580	601	818	811	831	963	967	974
	91.3333	325	326	330	448	454	469	591	583	601	816	815	836	960	970	975
	91.5	326	327	327	451	456	475	588	584	608	812	813	839	967	979	976
	91.6667	323	328	329	445	456	470	590	585	604	818	817	833	961	973	982
	91.8333	326	327	329	449	454	469	591	584	603	813	813	840	963	966	982
	92	325	328	327	457	458	473	590	583	603	819	814	841	961	976	982
	92.1667	329	327	332	453	458	476	595	584	604	823	820	837	967	978	980
	92.3333	324	325	329	453	456	474	593	583	610	816	814	837	969	978	982
	92.5	327	331	329	455	457	470	591	584	610	819	818	847	972	979	978
	92.6667	326	331	333	455	457	473	594	590	610	820	818	846	968	979	983
	92.8333	328	333	331	451	457	480	596	587	611	826	822	848	968	978	987
	93	329	333	332	455	464	478	599	586	609	823	830	842	976	977	991
	93.1667	326	329	331	457	460	478	595	585	612	823	821	845	969	978	983
	93.3333	330	331	334	461	463	474	601	591	610	821	823	840	971	982	987
	93.5	329	327	330	454	462	476	600	592	609	822	822	845	974	980	989
	93.6667	327	335	328	456	457	480	599	590	615	821	828	851	975	983	989
	93.8333	324	330	333	458	463	478	604	597	612	827	826	852	975	981	993
	94	329	327	335	457	460	477	596	597	614	827	824	849	974	981	992
	94.1667	328	334	336	459	464	478	604	588	618	826	820	846	977	982	994
	94.3333	330	334	335	460	461	483	599	593	616	828	828	850	979	987	991
	94.5	328	332	338	458	460	478	602	593	615	831	832	856	981	988	995
	94.6667	330	332	334	457	464	483	595	595	619	827	827	847	976	985	994
	94.8333	330	329	332	459	465	482	604	596	619	830	825	844	979	992	997
	95	331	333	331	460	465	486	607	597	621	831	833	850	980	995	997
	95.1667	327	332	335	457	465	485	606	606	619	833	833	851	985	986	997
	95.3333	333	336	333	461	466	483	610	601	623	832	833	852	990	990	1003
	95.5	336	337	336	462	464	482	613	599	622	834	833	851	979	1000	1000
	95.6667	337	333	338	464	468	482	611	602	621	834	834	853	981	996	1003
	95.8333	327	335	336	470	468	490	611	598	624	833	832	855	989	985	1005
	96	328	336	339	465	470	486	609	605	620	832	834	857	995	995	1007
	96.1667	332	338	340	465	472	485	612	602	621	842	838	861	986	996	1007
	96.3333	332	338	338	466	471	490	610	609	618	836	831	865	986	1002	1019
	96.5	331	335	334	466	472	491	609	602	624	839	835	859	981	993	1005
	96.6667	335	336	338	467	474	488	613	603	626	835	836	859	992	1003	1004
	96.8333	333	335	334	471	468	491	618	604	625	840	844	866	989	997	1011
	97	329	335	338	468	474	487	619	610	632	841	842	862	988	1001	1011
	97.1667	332	338	337	467	474	490	611	606	627	843	837	867	988	1000	1014
	97.3333	335	337	339	469	474	491	617	609	629	842	841	865	991	1001	1010
	97.5	332	338	337	469	471	495	616	610	630	842	838	869	993	1000	1012
	97.6667	335	338	337	473	474	494	622	607	632	843	843	868	993	1003	1014
	97.8333	333	341	340	472	472	498	616	609	630	847	836	870	997	1006	1019
	98	333	337	343	474	479	496	618	609	633	842	836	868	997	1011	1016
	98.1667	335	337	344	468	475	497	618	607	629	849	842	870	993	1008	1021
	98.3333	332	338	340	477	479	491	618	610	632	843	841	874	998	1005	1017
	98.5	338	338	340	473	475	496	622	609	631	846	849	866	998	1002	1011
	98.6667	338	338	343	476	480	496	621	609	632	851	842	872	1001	1014	1025
	98.8333	336	341	337	477	477	498	617	615	632	849	849	872	998	1005	1017
	99	338	338	340	471	481	494	625	615	631	848	847	870	1002	1012	1028
	99.1667	335	339	345	478	483	496	620	615	639	851	850	869	1003	1010	1021
	99.3333	336	342	343	471	478	496	618	615	639	856	856	869	1002	1006	1027
	99.5	341	345	343	478	482	500	621	618	639	850	847	874	1007	1012	1026
	99.6667	339	339	337	478	480	498	624	613	637	848	846	875	1000	1013	1023
	99.8333	337	341	342	477	483	497	626	614	634	849	848	871	1005	1012	1024
	100	337	339	342	478	481	496	628	619	635	855	848	871	1000	1011	1029
	100.167	338	343	345	480	485	503	626	619	643	851	853	874	1013	1013	1027
	100.333	340	340	342	479	483	503	623	620	637	849	849	881	1010	1014	1028
	100.5	343	342	343	484	480	499	624	618	646	857	855	877	1010	1014	1030
	100.667	334	343	345	480	483	500	630	613	641	858	857	874	1006	1014	1031
	100.833	345	343	345	483	480	503	626	616	644	854	857	880	1012	1014	1030
	101	340	343	340	485	483	504	633	623	642	852	855	880	1003	1013	1026
	101.167	342	342	346	483	480	503	630	622	643	857	857	881	1014	1017	1027
	101.333	341	340	344	485	487	510	629	620	644	861	858	884	1008	1019	1031
	101.5	342	342	346	482	483	508	632	619	640	860	856	879	1011	1020	1036
	101.667	343	339	344	479	489	504	639	621	648	853	851	884	1010	1017	1039
	101.833	337	343	348	485	490	500	633	619	644	856	858	880	1015	1016	1036
	102	343	344	345	485	486	505	635	622	643	853	855	885	1016	1019	1034
	102.167	343	349	346	480	486	507	632	627	647	859	854	886	1018	1026	1039
	102.333	340	342	343	483	488	505	634	621	644	857	858	888	1018	1019	1038
	102.5	343	345	345	488	489	507	632	623	647	857	857	886	1014	1019	1037
	102.667	343	345	347	484	493	508	636	625	643	857	859	884	1018	1016	1037
	102.833	343	341	349	484	490	507	631	629	642	857	855	888	1018	1026	1040
	103	339	342	347	485	489	509	636	628	650	863	856	888	1016	1023	1035
	103.167	346	347	349	488	493	511	637	631	651	865	868	886	1015	1028	1043
	103.333	344	344	344	486	491	511	638	630	657	866	865	888	1017	1020	1044
	103.5	337	343	348	487	491	509	637	629	645	862	857	895	1019	1024	1036
	103.667	342	346	349	488	495	509	639	629	653	864	861	899	1027	1027	1043
	103.833	342	342	347	487	492	510	637	632	653	870	864	894	1018	1036	1044
	104	340	345	343	494	492	511	642	633	654	869	866	892	1021	1030	1041
	104.167	343	346	348	488	495	513	641	632	652	867	862	891	1026	1031	1045
	104.333	345	347	345	489	492	512	640	629	654	870	870	893	1022	1028	1037
	104.5	342	349	345	492	490	511	645	632	657	869	868	891	1027	1033	1050
	104.667	343	345	349	495	495	514	648	633	654	867	870	892	1026	1035	1050
	104.833	347	343	349	494	496	516	647	634	655	867	868	896	1028	1026	1057
	105	345	352	349	495	500	514	648	635	656	870	867	895	1025	1034	1052
	105.167	344	346	350	493	498	515	646	639	651	867	869	896	1030	1034	1057
	105.333	344	347	353	497	499	517	643	633	656	874	865	895	1028	1033	1047
	105.5	350	350	347	492	495	518	645	635	656	871	866	898	1026	1031	1047
	105.667	341	353	350	492	498	514	645	631	657	873	869	895	1026	1031	1058
	105.833	343	342	347	496	498	518	646	633	653	869	869	895	1029	1035	1047
	106	346	348	354	494	495	515	653	634	655	871	868	903	1027	1032	1055
	106.167	349	347	349	492	498	519	653	633	658	875	878	903	1031	1034	1052
	106.333	344	347	354	497	492	520	653	639	658	870	877	901	1039	1038	1055
	106.5	346	350	355	499	505	524	649	639	660	863	874	903	1034	1037	1056
	106.667	350	346	351	501	499	521	654	642	664	875	873	906	1042	1039	1055
	106.833	347	349	351	497	504	521	653	644	661	878	879	897	1042	1034	1061
	107	347	350	352	499	500	520	646	642	664	875	875	908	1034	1033	1059
	107.167	343	349	351	498	504	521	654	644	661	876	878	903	1028	1036	1058
	107.333	349	351	351	495	503	521	657	642	667	874	878	904	1035	1045	1057
	107.5	346	349	355	506	503	521	655	646	662	875	876	900	1040	1046	1054
	107.667	347	352	353	500	506	523	653	645	665	880	876	904	1037	1041	1067
	107.833	353	353	353	500	503	523	662	649	666	877	875	904	1038	1039	1060
	108	347	351	348	503	503	523	655	649	667	871	880	910	1035	1038	1061
	108.167	348	351	347	500	501	523	662	645	671	877	880	909	1040	1051	1067
	108.333	349	351	354	505	501	524	659	646	667	882	874	907	1043	1042	1061
	108.5	354	350	355	498	505	524	656	648	669	881	877	909	1047	1042	1063
	108.667	353	353	356	505	511	525	659	646	671	880	885	904	1048	1048	1068
	108.833	351	348	349	507	502	528	659	646	668	877	882	908	1051	1050	1064
	109	352	350	357	509	508	526	660	651	671	882	883	915	1046	1055	1063
	109.167	349	354	356	507	509	533	663	648	672	875	885	911	1042	1046	1071
	109.333	351	350	352	509	508	530	666	647	672	883	889	915	1041	1053	1071
	109.5	354	350	356	507	513	526	667	652	670	890	883	912	1047	1052	1065
	109.667	348	353	355	510	513	528	668	652	675	885	888	917	1049	1046	1073
	109.833	352	356	356	509	513	528	664	653	677	889	877	913	1052	1050	1070
	110	350	352	356	506	511	525	664	653	675	885	889	911	1054	1054	1075
	110.167	351	353	358	510	510	532	672	654	674	889	889	923	1052	1051	1071
	110.333	355	354	358	511	509	533	665	653	676	888	886	922	1053	1053	1072
	110.5	354	351	359	515	514	531	667	657	675	892	891	920	1045	1052	1076
	110.667	350	357	355	514	513	532	670	656	676	891	886	925	1055	1065	1082
	110.833	351	352	358	515	511	531	670	659	679	889	890	922	1056	1055	1078
	111	353	355	356	510	512	533	666	655	670	889	896	923	1061	1055	1079
	111.167	352	358	360	512	511	532	673	651	682	891	895	923	1057	1064	1075
	111.333	353	356	357	512	514	535	668	657	684	892	892	919	1054	1059	1075
	111.5	358	358	360	514	512	537	674	661	674	891	896	932	1063	1057	1081
	111.667	356	355	358	513	514	536	675	660	684	896	896	928	1063	1060	1088
	111.833	357	351	358	515	515	538	679	665	683	890	904	930	1062	1063	1084
	112	353	358	362	518	518	533	675	663	682	899	897	922	1059	1063	1083
	112.167	354	360	360	513	520	538	672	661	679	902	902	928	1059	1063	1082
	112.333	353	359	356	516	521	538	682	664	688	896	903	931	1062	1064	1086
	112.5	355	357	358	518	518	539	676	665	688	901	901	935	1072	1065	1088
	112.667	353	355	360	517	517	541	678	665	686	896	904	929	1067	1061	1084
	112.833	357	358	360	519	521	537	679	660	687	899	904	937	1062	1068	1082
	113	357	358	362	518	520	542	679	668	684	903	905	927	1063	1068	1093
	113.167	356	357	360	520	519	539	680	664	686	904	905	932	1066	1064	1095
	113.333	358	361	366	524	523	542	685	664	689	899	905	932	1062	1073	1094
	113.5	355	361	363	522	522	542	681	670	692	904	907	936	1062	1077	1088
	113.667	354	359	362	522	516	542	680	674	688	904	901	933	1072	1064	1087
	113.833	359	359	366	528	523	546	687	671	694	916	908	938	1073	1074	1096
	114	360	359	359	522	522	545	688	671	694	909	909	942	1080	1073	1099
	114.167	354	358	365	520	523	540	688	665	691	905	906	943	1072	1074	1104
	114.333	358	360	363	523	519	545	680	675	693	908	910	939	1073	1070	1095
	114.5	355	361	366	523	524	547	688	672	691	912	905	942	1075	1074	1095
	114.667	356	362	365	524	524	549	688	672	695	915	908	946	1073	1076	1109
	114.833	358	361	364	525	521	549	686	673	695	914	911	945	1077	1078	1113
	115	360	362	365	526	524	546	690	679	699	916	906	938	1084	1077	1105
	115.167	358	360	365	526	524	547	692	674	692	908	909	946	1078	1074	1104
	115.333	356	359	366	524	526	547	696	681	697	908	910	945	1077	1079	1105
	115.5	364	360	362	528	528	549	690	677	701	910	917	947	1080	1086	1105
	115.667	360	363	368	529	529	545	692	677	699	920	920	944	1075	1074	1107
	115.833	361	365	369	528	530	548	696	679	698	905	917	949	1079	1084	1110
	116	362	361	369	522	524	546	693	679	697	910	919	952	1080	1080	1104
	116.167	360	366	366	529	528	550	694	682	702	916	920	953	1085	1085	1111
	116.333	359	362	365	532	531	546	697	682	701	921	918	952	1086	1080	1112
	116.5	365	365	369	531	529	553	691	680	706	919	914	948	1090	1089	1107
	116.667	366	364	369	533	529	553	699	685	707	921	920	956	1092	1087	1114
	116.833	365	366	367	536	533	552	691	682	706	921	924	951	1089	1092	1118
	117	363	369	370	533	529	554	697	685	708	919	917	958	1092	1090	1112
	117.167	362	367	369	533	528	551	698	685	705	922	918	958	1086	1086	1116
	117.333	366	363	372	532	535	558	694	682	705	921	922	961	1097	1088	1118
	117.5	364	366	371	532	530	554	702	688	709	924	928	956	1093	1086	1120
	117.667	368	368	370	536	536	556	704	690	709	925	925	960	1093	1087	1116
	117.833	365	368	369	538	535	553	705	688	706	931	926	955	1090	1093	1111
	118	363	367	376	539	532	559	708	688	711	920	921	964	1100	1100	1122
	118.167	367	367	373	537	536	557	706	688	712	931	924	964	1099	1091	1115
	118.333	368	368	373	534	535	557	704	687	714	926	930	968	1100	1097	1122
	118.5	368	370	367	536	540	556	710	691	711	928	930	964	1093	1095	1120
	118.667	366	369	370	533	540	559	705	694	712	932	930	973	1101	1095	1131
	118.833	370	369	376	539	541	559	708	691	714	931	930	972	1111	1106	1131
	119	367	362	372	540	542	564	709	692	718	939	936	969	1104	1102	1130
	119.167	362	369	375	541	539	564	712	696	716	935	944	962	1103	1102	1133
	119.333	369	370	376	543	541	562	712	689	721	929	926	967	1105	1101	1126
	119.5	365	371	376	537	540	561	707	698	719	936	932	966	1102	1106	1128
	119.667	367	370	375	540	539	560	709	695	718	930	932	965	1094	1097	1129
	119.833	367	370	377	543	540	562	709	690	712	944	938	975	1101	1100	1130
	120	367	369	374	544	541	563	716	699	719	934	936	973	1111	1104	1135
	120.167	366	370	374	540	544	565	716	698	714	935	940	973	1114	1098	1137
	120.333	372	371	375	542	539	563	711	697	719	941	941	971	1104	1107	1133
	120.5	368	371	376	544	544	564	719	700	717	931	931	972	1108	1105	1138
	120.667	370	369	378	545	547	563	716	700	719	940	941	981	1115	1112	1142

## Sheet: Fig. S1c
δ-toxin kinetics
		δ-toxin monomeric concentration
	Time (h)	0.05 mg/ml	0.05 mg/ml	0.05 mg/ml	0.1 mg/ml	0.1 mg/ml	0.1 mg/ml	0.25 mg/ml	0.25 mg/ml	0.25 mg/ml	0.5 mg/ml	0.5 mg/ml	0.5 mg/ml	1.0 mg/ml	1.0 mg/ml	1.0 mg/ml
	0	101	101	112	104	108	105	122	122	124	152	143	140	168	213	151
	0.166667	94	93	105	102	102	97	112	118	117	141	133	130	156	203	137
	0.333333	95	97	99	92	98	93	105	109	110	139	134	125	156	201	138
	0.5	98	94	103	102	95	92	112	113	114	139	136	126	148	198	138
	0.666667	93	99	101	96	96	94	105	104	112	137	131	120	153	193	139
	0.833333	95	89	96	94	99	99	108	107	115	136	135	125	149	198	135
	1	93	91	105	94	96	99	106	108	107	136	125	127	146	199	135
	1.16667	90	91	100	99	92	94	107	107	115	137	134	120	149	194	128
	1.33333	91	96	104	95	97	94	107	111	110	139	131	125	148	190	132
	1.5	94	95	101	95	96	96	108	112	111	140	134	128	152	197	139
	1.66667	96	93	100	95	95	97	106	105	113	141	131	126	147	195	134
	1.83333	97	94	101	98	96	93	108	104	112	136	129	124	150	197	130
	2	91	90	98	94	96	96	104	108	109	137	127	126	150	194	134
	2.16667	95	95	102	99	95	96	108	106	110	140	132	125	147	200	134
	2.33333	93	93	102	97	98	95	104	106	109	141	128	123	147	199	135
	2.5	95	95	102	94	99	95	103	108	112	141	131	122	152	204	132
	2.66667	94	92	99	96	96	96	111	106	111	139	130	125	149	209	132
	2.83333	91	92	99	99	97	93	106	107	110	138	129	124	152	207	134
	3	93	92	101	96	97	97	107	107	113	142	129	124	150	205	134
	3.16667	94	92	100	97	99	95	110	109	108	138	130	123	149	200	135
	3.33333	93	91	101	95	96	97	106	106	111	139	130	123	152	202	133
	3.5	94	92	102	97	99	96	108	107	115	140	133	124	150	203	135
	3.66667	94	92	99	96	97	96	108	110	112	141	132	126	147	206	136
	3.83333	91	94	102	97	96	97	110	107	109	137	129	124	152	206	131
	4	93	91	102	96	97	92	109	107	111	141	130	124	150	208	135
	4.16667	94	92	103	96	98	95	106	106	113	140	131	127	153	207	132
	4.33333	94	91	99	95	96	93	108	106	112	139	129	123	149	205	132
	4.5	93	96	101	95	97	96	109	107	110	139	131	124	150	207	131
	4.66667	92	91	104	95	95	95	107	109	112	140	129	125	150	209	131
	4.83333	93	92	98	97	97	95	108	108	110	138	131	123	149	207	133
	5	92	91	97	95	94	95	105	105	111	136	132	126	149	204	131
	5.16667	93	89	98	92	94	93	104	104	111	141	132	123	145	206	132
	5.33333	92	90	97	95	96	96	107	109	110	139	129	121	149	205	135
	5.5	92	89	101	93	94	92	109	107	113	139	130	123	150	204	133
	5.66667	93	93	102	93	96	96	110	107	110	139	131	122	150	203	132
	5.83333	92	90	102	94	97	97	107	109	110	141	130	123	149	199	133
	6	93	94	99	94	95	94	104	105	110	139	130	123	150	203	131
	6.16667	91	92	99	93	96	95	106	104	108	138	129	123	148	199	133
	6.33333	93	92	99	93	96	92	108	106	110	138	132	121	148	201	131
	6.5	91	90	99	94	95	96	105	106	109	139	132	121	149	202	131
	6.66667	93	95	99	92	94	94	106	104	114	139	132	123	149	200	131
	6.83333	92	91	99	97	95	95	107	108	113	139	129	123	149	201	131
	7	93	92	100	94	94	96	108	110	113	140	132	126	150	202	131
	7.16667	94	92	100	95	94	92	105	105	113	139	128	121	148	202	134
	7.33333	91	93	100	92	95	93	105	107	110	137	129	121	147	200	131
	7.5	93	93	101	97	98	96	107	111	111	139	132	123	146	200	131
	7.66667	94	92	98	91	95	96	107	105	113	137	130	125	148	199	130
	7.83333	91	90	99	93	96	95	107	106	109	139	130	121	148	203	133
	8	93	94	101	98	95	94	104	107	115	141	131	123	150	198	132
	8.16667	92	91	102	94	96	95	104	108	110	141	132	122	149	202	131
	8.33333	92	91	98	96	96	97	108	104	109	140	133	121	147	199	129
	8.5	93	91	99	96	95	92	106	105	110	138	130	123	149	202	132
	8.66667	93	91	99	95	93	94	104	108	111	141	129	125	145	198	131
	8.83333	94	92	98	96	93	96	104	109	110	139	133	124	148	199	129
	9	88	89	100	93	92	95	104	105	109	137	129	122	150	202	131
	9.16667	93	89	97	95	94	96	109	105	111	140	131	121	149	194	131
	9.33333	92	94	98	94	96	97	107	106	111	139	130	121	151	198	132
	9.5	89	89	98	94	95	96	109	107	112	142	133	126	148	197	131
	9.66667	91	93	102	96	95	95	103	107	107	140	132	124	145	199	130
	9.83333	93	93	100	96	93	97	107	106	110	139	129	121	150	196	133
	10	93	93	99	94	93	93	103	108	109	137	130	122	149	197	134
	10.1667	91	88	99	94	95	97	104	105	109	136	129	123	147	194	133
	10.3333	95	91	100	96	95	93	103	108	111	139	131	122	150	194	129
	10.5	92	91	100	96	96	94	106	108	115	139	128	122	149	195	134
	10.6667	92	92	99	95	95	94	103	109	111	141	129	124	148	197	131
	10.8333	91	91	99	95	94	93	108	103	111	136	131	127	148	192	130
	11	92	91	100	93	96	95	105	105	115	140	130	122	145	194	131
	11.1667	92	90	99	93	95	91	104	106	110	137	132	120	148	197	128
	11.3333	89	88	97	93	92	94	100	108	109	139	130	125	146	194	129
	11.5	90	89	100	94	98	94	104	107	110	138	128	123	146	195	132
	11.6667	91	90	99	96	93	94	103	105	111	143	130	124	147	193	127
	11.8333	90	88	96	94	97	96	105	107	111	141	129	119	151	193	131
	12	92	90	99	97	93	91	106	106	112	138	132	123	146	196	129
	12.1667	90	92	98	97	96	94	105	107	113	141	127	124	151	198	131
	12.3333	95	88	100	93	96	97	105	105	110	142	132	125	147	195	132
	12.5	94	91	99	93	96	94	104	105	112	139	130	119	145	197	132
	12.6667	92	91	101	91	93	96	106	107	111	141	130	127	145	196	132
	12.8333	93	91	97	92	96	94	104	106	111	140	130	123	149	194	130
	13	89	89	99	95	93	93	105	104	110	140	129	124	150	196	132
	13.1667	94	92	97	94	96	94	104	104	110	139	131	123	143	196	134
	13.3333	90	88	98	91	94	95	107	107	111	141	129	123	149	195	133
	13.5	91	90	99	94	93	95	106	104	111	142	130	122	152	195	129
	13.6667	92	90	99	92	92	94	108	106	109	140	131	124	146	195	132
	13.8333	93	93	102	96	97	91	102	108	113	141	131	121	147	195	132
	14	93	92	99	94	94	95	103	107	108	143	132	126	145	199	133
	14.1667	90	90	99	97	97	96	107	106	109	143	131	121	146	193	131
	14.3333	96	91	103	96	95	96	104	108	112	144	130	124	150	196	131
	14.5	88	92	100	95	95	93	104	107	111	140	131	126	146	190	128
	14.6667	93	93	98	96	96	96	108	103	110	139	133	121	149	193	133
	14.8333	94	90	97	98	96	96	106	107	112	140	131	125	154	193	132
	15	92	92	98	94	95	92	102	108	110	141	128	122	150	194	132
	15.1667	91	92	101	96	96	93	105	107	113	142	134	123	145	192	131
	15.3333	92	90	100	93	95	98	109	105	109	142	130	121	150	194	130
	15.5	92	90	102	92	97	95	106	107	112	140	130	124	147	198	131
	15.6667	91	92	99	95	94	94	106	107	110	141	130	125	150	196	131
	15.8333	93	91	100	94	98	95	108	108	111	143	129	125	150	196	132
	16	91	92	100	94	94	96	105	107	111	144	129	121	148	193	133
	16.1667	93	91	101	93	95	95	104	104	114	144	132	124	148	192	129
	16.3333	94	90	97	95	94	95	107	104	110	144	131	122	150	192	131
	16.5	92	90	99	96	94	94	106	109	113	142	128	121	148	196	129
	16.6667	91	92	100	94	98	94	106	109	112	142	131	121	150	197	132
	16.8333	89	91	101	94	96	93	107	106	112	142	132	124	154	198	133
	17	92	90	100	94	94	94	107	106	112	142	129	119	147	196	130
	17.1667	92	92	99	93	97	92	106	106	111	145	129	124	150	194	132
	17.3333	92	92	98	96	94	94	107	106	112	145	131	124	152	194	134
	17.5	91	93	101	94	97	97	105	107	112	145	129	120	146	197	132
	17.6667	92	90	98	94	96	91	105	104	112	143	132	124	151	193	129
	17.8333	90	89	98	92	93	93	107	107	111	144	133	123	149	194	132
	18	96	92	101	94	98	93	105	107	115	141	131	125	148	197	131
	18.1667	93	89	97	95	94	95	110	108	112	143	130	121	149	194	134
	18.3333	91	92	100	96	97	95	102	104	109	143	133	121	148	196	132
	18.5	96	90	101	97	93	97	106	105	110	146	134	121	148	197	131
	18.6667	92	93	103	95	98	92	107	106	113	145	132	125	148	197	134
	18.8333	92	93	99	94	97	98	108	107	114	146	131	120	148	196	130
	19	91	91	99	93	94	96	105	106	109	142	131	124	146	197	129
	19.1667	92	93	100	94	95	94	107	109	111	142	130	125	148	198	130
	19.3333	91	90	98	96	93	95	107	107	115	142	131	126	149	194	129
	19.5	92	94	99	99	99	94	105	104	115	145	128	125	147	198	130
	19.6667	92	90	99	91	95	95	105	106	112	144	130	121	148	197	130
	19.8333	94	94	101	95	98	96	105	108	114	144	132	123	148	196	133
	20	93	91	97	97	95	94	104	108	112	142	129	124	146	192	134
	20.1667	92	92	98	94	96	95	107	104	113	146	130	122	148	193	130
	20.3333	93	91	97	95	94	93	109	107	114	143	129	122	145	196	130
	20.5	91	91	100	95	99	94	105	108	113	143	130	123	148	197	133
	20.6667	94	93	100	95	94	94	106	110	113	146	131	125	150	197	129
	20.8333	93	90	99	97	97	96	108	107	109	145	134	125	148	197	131
	21	92	91	100	95	95	94	106	110	113	145	130	123	147	198	130
	21.1667	90	93	99	97	95	95	107	108	113	146	129	122	148	197	130
	21.3333	91	91	100	94	93	93	107	104	110	146	132	124	150	196	135
	21.5	93	91	100	93	95	95	109	109	112	142	133	124	150	198	130
	21.6667	91	91	99	94	97	96	108	107	110	145	131	121	150	196	133
	21.8333	91	90	101	92	96	94	106	108	112	142	131	124	148	197	132
	22	94	91	98	96	96	94	106	105	113	146	130	121	148	199	131
	22.1667	89	90	101	93	95	95	107	105	114	148	132	124	146	197	131
	22.3333	95	91	99	94	98	95	107	108	111	148	130	121	146	192	132
	22.5	94	89	102	94	96	96	108	110	112	147	130	121	150	199	132
	22.6667	91	90	100	93	96	92	106	107	112	145	130	124	149	199	130
	22.8333	94	91	99	92	97	96	108	110	114	145	131	125	148	195	131
	23	95	93	99	95	98	96	107	104	112	147	130	121	147	195	132
	23.1667	92	92	100	94	98	95	105	109	111	144	135	124	147	195	128
	23.3333	91	90	101	97	95	91	105	107	111	144	130	124	149	195	131
	23.5	92	93	100	95	96	95	105	103	109	145	128	122	150	195	129
	23.6667	90	91	101	92	91	93	106	109	110	144	130	123	144	196	134
	23.8333	91	92	101	95	97	93	106	108	113	144	128	121	149	196	132
	24	94	91	97	95	92	92	104	106	113	145	132	121	147	194	131
	24.1667	91	90	99	94	94	95	104	108	113	146	129	123	148	197	130
	24.3333	93	91	101	94	97	94	108	110	111	147	134	124	147	199	129
	24.5	90	89	101	95	93	93	106	108	111	148	130	124	145	201	134
	24.6667	90	94	101	92	96	95	108	107	115	147	132	124	150	200	130
	24.8333	93	92	99	95	93	94	105	107	109	144	130	123	149	197	132
	25	90	90	98	96	95	92	107	106	113	143	134	124	147	196	131
	25.1667	92	90	99	100	97	93	109	108	113	148	131	122	147	197	132
	25.3333	93	92	98	95	95	95	107	107	114	145	132	128	147	193	135
	25.5	91	94	101	93	97	95	107	106	111	144	133	125	148	197	129
	25.6667	91	92	101	94	98	94	107	108	111	146	130	125	148	197	130
	25.8333	92	91	101	97	97	94	105	105	115	144	134	122	149	196	130
	26	91	90	99	94	94	93	104	106	115	144	132	124	148	195	133
	26.1667	90	90	102	96	98	97	104	107	113	146	134	125	148	196	130
	26.3333	91	93	102	96	96	97	107	106	113	145	131	124	148	199	134
	26.5	93	93	99	96	98	96	104	106	113	145	132	127	150	197	128
	26.6667	90	88	103	94	97	94	104	109	115	145	131	125	148	195	130
	26.8333	93	93	100	94	95	93	107	109	114	147	129	123	145	198	131
	27	91	91	99	93	97	97	107	107	113	143	129	126	146	195	130
	27.1667	92	94	99	93	95	94	106	108	111	147	135	122	149	198	131
	27.3333	93	90	100	97	94	95	105	107	115	144	134	121	149	194	132
	27.5	94	90	99	97	93	99	107	110	111	147	132	122	147	198	135
	27.6667	91	92	100	96	96	94	107	108	113	146	132	124	147	195	133
	27.8333	91	92	100	94	94	93	103	109	112	149	132	124	150	196	132
	28	92	92	100	93	92	95	106	109	115	146	132	121	148	194	130
	28.1667	93	91	97	93	96	95	105	108	112	149	132	121	146	197	128
	28.3333	93	90	100	95	93	96	108	110	111	147	132	125	148	194	128
	28.5	91	91	100	93	94	93	108	108	113	146	132	121	150	196	131
	28.6667	92	92	99	96	95	97	104	105	112	144	134	128	144	199	131
	28.8333	92	93	98	97	95	97	106	108	110	144	128	125	151	190	131
	29	91	91	99	93	94	94	105	108	110	146	133	126	149	191	129
	29.1667	92	95	99	96	94	96	107	107	111	147	132	123	148	197	129
	29.3333	92	93	102	94	95	94	106	107	114	148	131	125	151	198	134
	29.5	92	93	100	93	96	94	107	110	110	147	133	123	146	195	129
	29.6667	95	95	99	95	96	95	106	105	113	145	130	125	148	193	131
	29.8333	92	91	100	94	96	93	103	108	115	147	131	124	152	198	129
	30	94	90	98	93	96	97	105	108	113	145	129	124	151	192	131
	30.1667	91	89	100	91	94	94	107	107	111	144	132	120	147	194	128
	30.3333	97	93	101	98	96	98	107	106	112	145	131	127	149	195	131
	30.5	95	93	101	97	101	96	106	109	111	145	134	128	149	197	132
	30.6667	93	88	98	94	96	97	104	106	109	148	132	125	150	196	134
	30.8333	93	93	99	92	96	95	108	103	112	145	130	121	149	194	127
	31	90	90	99	96	96	93	106	108	112	148	132	120	150	194	132
	31.1667	91	93	100	95	95	97	105	106	114	143	135	125	151	192	132
	31.3333	91	94	100	93	98	95	109	105	112	148	129	123	151	197	131
	31.5	90	91	100	94	98	94	105	106	110	145	131	127	148	195	128
	31.6667	91	92	99	94	96	96	106	104	113	144	130	123	149	196	133
	31.8333	96	91	100	97	96	94	105	108	113	146	132	126	147	193	133
	32	91	90	99	99	96	95	107	105	108	142	131	125	147	194	132
	32.1667	95	92	97	98	96	94	103	106	113	143	132	125	152	194	132
	32.3333	93	92	101	96	96	93	106	108	110	145	133	122	153	196	131
	32.5	97	91	100	96	94	99	106	105	109	148	130	124	151	196	130
	32.6667	95	88	96	93	93	95	106	109	113	146	131	122	152	198	130
	32.8333	91	92	98	96	92	98	106	107	114	146	131	124	150	199	130
	33	92	90	100	94	94	95	108	105	113	145	135	127	150	196	128
	33.1667	91	91	101	94	95	92	107	109	114	147	131	126	150	196	132
	33.3333	96	90	101	95	95	97	107	109	111	145	133	125	151	197	130
	33.5	94	92	99	91	92	94	102	109	112	146	129	124	151	193	134
	33.6667	89	90	99	92	95	92	106	108	110	146	131	124	150	195	131
	33.8333	94	89	100	98	94	96	107	106	110	144	133	123	149	197	130
	34	96	90	99	94	95	93	104	106	109	145	133	122	151	195	131
	34.1667	92	93	100	95	96	97	106	107	114	145	131	124	152	198	133
	34.3333	93	90	101	97	97	97	106	107	110	149	133	123	151	200	129
	34.5	90	89	100	95	96	97	108	108	108	144	131	125	149	196	131
	34.6667	91	92	102	96	96	93	106	108	109	148	132	124	151	197	132
	34.8333	93	93	101	95	96	94	108	110	116	145	131	123	152	194	134
	35	90	92	99	95	95	91	106	106	112	143	130	124	152	194	131
	35.1667	94	90	102	93	98	94	107	107	116	147	131	121	151	193	129
	35.3333	92	93	102	93	98	95	106	109	113	150	131	124	148	195	129
	35.5	91	91	100	95	97	98	103	107	111	148	132	121	152	190	133
	35.6667	89	90	100	92	94	94	105	104	114	148	133	123	149	196	133
	35.8333	92	93	99	95	95	92	104	106	110	145	131	123	147	192	132
	36	92	93	99	95	96	96	106	108	114	147	133	126	150	194	132
	36.1667	91	92	98	95	98	97	104	106	115	149	130	124	153	198	133
	36.3333	94	90	97	94	94	91	103	107	111	147	132	123	147	194	130
	36.5	92	92	100	94	94	97	105	109	113	147	134	124	148	194	132
	36.6667	92	93	99	95	98	96	107	110	111	149	132	126	153	197	135
	36.8333	92	91	98	95	97	93	107	108	112	146	134	122	149	196	132
	37	93	92	99	94	96	94	106	107	113	149	135	123	154	196	132
	37.1667	96	94	97	93	94	94	110	108	115	147	132	123	151	196	135
	37.3333	93	92	100	94	96	94	106	108	113	147	131	127	151	198	133
	37.5	90	94	100	94	95	96	107	109	112	145	133	122	148	192	133
	37.6667	92	90	100	91	98	94	107	108	112	148	129	124	154	194	132
	37.8333	93	92	99	95	96	95	103	109	113	146	131	123	148	197	129
	38	95	91	98	94	97	97	106	108	111	149	134	124	153	195	132
	38.1667	92	93	101	95	98	95	106	108	112	148	133	122	151	198	134
	38.3333	94	92	100	98	98	97	103	106	113	149	134	122	150	195	134
	38.5	93	91	101	92	98	95	104	108	112	146	132	126	152	195	133
	38.6667	90	91	98	94	96	92	104	110	113	148	132	124	150	196	135
	38.8333	95	90	102	97	94	93	104	107	112	145	132	123	153	195	133
	39	94	91	101	95	93	92	105	108	112	147	132	124	152	193	130
	39.1667	94	95	101	95	97	92	107	108	115	148	132	125	151	196	134
	39.3333	91	92	100	93	96	94	107	107	113	144	133	124	152	195	134
	39.5	93	92	100	93	97	96	107	108	110	148	129	124	147	194	135
	39.6667	92	95	101	96	95	95	106	106	113	145	130	123	151	200	132
	39.8333	90	92	99	96	94	95	105	106	112	143	130	122	151	196	131
	40	95	89	101	92	95	97	107	106	111	148	131	123	149	192	131
	40.1667	92	89	98	95	97	99	102	105	109	148	133	122	151	196	133
	40.3333	93	94	100	96	93	94	101	108	113	146	133	126	152	196	134
	40.5	95	92	102	96	95	95	109	106	111	148	131	125	149	194	137
	40.6667	92	91	100	94	96	94	105	107	113	148	132	123	152	195	134
	40.8333	94	92	100	96	96	91	106	105	113	146	132	121	154	195	131
	41	91	92	101	97	96	95	110	111	112	144	131	125	153	194	133
	41.1667	93	89	100	95	96	94	103	107	113	150	133	124	147	196	132
	41.3333	95	93	102	97	97	95	107	110	117	148	133	123	152	197	133
	41.5	92	93	105	96	98	94	106	107	113	144	133	120	150	195	131
	41.6667	92	91	99	95	93	90	107	107	115	143	130	121	151	195	131
	41.8333	93	92	99	94	94	95	105	106	112	145	130	126	151	197	134
	42	94	92	99	96	92	94	109	107	113	150	133	123	151	195	135
	42.1667	90	91	99	94	96	93	106	105	113	147	130	121	147	197	132
	42.3333	89	90	100	94	95	92	105	107	113	147	132	125	150	195	133
	42.5	91	95	97	96	95	93	106	108	111	147	133	124	150	197	134
	42.6667	91	93	98	94	95	94	106	107	112	147	130	122	149	194	131
	42.8333	93	90	100	93	93	97	107	107	109	142	132	121	149	197	131
	43	93	91	99	99	96	96	106	109	111	152	135	122	151	196	133
	43.1667	91	94	99	93	97	94	107	107	112	146	132	122	145	197	132
	43.3333	91	91	104	94	93	94	105	109	112	146	131	123	148	197	133
	43.5	94	89	99	96	96	94	103	109	110	147	134	124	149	198	135
	43.6667	93	90	101	94	98	96	101	105	109	145	133	124	151	194	131
	43.8333	91	92	101	94	100	96	106	109	113	148	133	124	148	199	134
	44	91	93	101	95	96	98	106	106	113	149	131	124	154	196	131
	44.1667	95	90	101	94	96	95	107	108	112	148	133	125	150	198	134
	44.3333	92	92	102	96	97	93	107	108	115	150	135	123	151	200	134
	44.5	91	94	103	96	96	94	107	107	112	150	131	126	151	194	133
	44.6667	95	91	101	94	93	98	107	110	114	145	131	126	152	193	137
	44.8333	89	90	101	96	96	96	108	106	112	149	134	123	152	195	131
	45	95	89	101	97	95	94	108	108	114	147	131	122	151	196	134
	45.1667	90	91	99	95	97	95	106	108	112	146	131	124	151	193	132
	45.3333	94	94	98	97	96	90	106	106	111	148	130	125	152	196	134
	45.5	94	89	101	97	95	95	106	108	114	146	131	125	154	196	131
	45.6667	93	92	100	96	94	93	105	105	114	145	133	125	148	198	135
	45.8333	94	87	99	94	97	96	106	107	113	149	132	124	153	197	132
	46	91	92	101	93	93	98	104	106	113	148	131	125	152	193	132
	46.1667	95	97	100	95	96	95	105	110	113	150	132	127	150	200	131
	46.3333	91	90	99	94	95	94	106	107	110	149	133	125	153	196	133
	46.5	94	92	100	97	95	96	106	107	113	149	130	125	152	197	133
	46.6667	92	89	100	92	95	96	107	107	115	148	133	126	152	198	135
	46.8333	90	93	99	96	94	95	104	107	112	151	134	121	155	198	133
	47	90	92	100	98	95	94	104	105	113	145	132	124	148	196	134
	47.1667	90	91	102	96	95	96	105	108	113	151	135	127	151	199	133
	47.3333	94	90	101	95	98	93	106	110	114	146	131	124	148	200	132
	47.5	95	93	101	94	98	96	108	109	114	148	132	123	153	199	132
	47.6667	93	91	100	92	96	92	104	110	111	148	131	123	150	198	132
	47.8333	90	90	104	97	95	97	105	110	113	149	134	120	151	197	134
	48	93	95	101	95	95	96	106	108	113	147	133	124	151	194	133
	48.1667	94	94	104	95	95	94	106	110	112	148	134	124	150	197	135
	48.3333	92	90	103	94	97	94	104	108	115	144	132	124	150	196	134
	48.5	93	93	101	97	95	95	107	110	114	151	133	125	150	196	133
	48.6667	93	94	103	94	97	94	102	111	113	146	130	124	153	196	135
	48.8333	92	90	100	97	98	97	108	111	114	149	134	127	153	197	134
	49	91	90	100	97	94	97	105	106	113	147	130	122	151	198	136
	49.1667	94	94	101	95	99	96	106	109	112	150	133	127	152	194	132
	49.3333	93	91	102	98	92	96	105	108	114	151	130	126	150	196	133
	49.5	94	94	99	99	96	92	104	108	110	150	133	124	151	200	135
	49.6667	94	90	102	96	96	96	108	106	111	149	134	123	152	196	136
	49.8333	93	91	104	96	97	96	105	106	113	148	135	123	154	198	133
	50	92	90	102	93	95	93	108	107	111	145	132	124	148	198	133
	50.1667	92	92	100	94	93	95	102	107	110	146	130	124	154	195	134
	50.3333	96	95	100	99	94	97	105	110	112	147	131	123	148	198	131
	50.5	94	91	102	94	97	93	106	109	112	147	133	125	151	200	133
	50.6667	93	95	103	96	97	94	106	107	114	149	131	127	153	195	135
	50.8333	90	90	103	96	99	96	106	106	112	147	136	126	151	196	134
	51	92	92	102	98	97	97	108	106	114	149	131	125	152	195	136
	51.1667	93	93	103	97	99	94	106	107	112	147	131	126	151	199	134
	51.3333	94	92	102	96	97	96	105	110	113	151	131	130	151	196	135
	51.5	91	92	101	93	96	94	106	106	111	149	131	123	149	195	132
	51.6667	96	93	102	98	95	97	106	108	116	148	132	124	149	193	133
	51.8333	94	90	99	97	100	94	109	107	112	146	134	126	150	199	134
	52	90	92	99	96	96	96	108	109	113	144	131	124	149	195	133
	52.1667	92	96	103	95	98	97	108	108	114	149	130	126	153	195	135
	52.3333	94	91	102	95	95	98	104	107	115	147	134	122	150	197	132
	52.5	95	94	102	96	99	96	107	108	113	148	132	127	152	197	131
	52.6667	93	90	101	98	96	93	103	108	114	143	133	123	149	195	134
	52.8333	94	94	101	96	95	97	104	106	110	145	133	123	149	198	132
	53	94	92	100	95	96	96	106	110	112	149	134	126	150	197	134
	53.1667	92	93	99	94	97	95	107	106	110	149	131	127	152	199	133
	53.3333	92	92	101	96	99	97	107	108	113	146	133	126	150	199	132
	53.5	92	92	101	92	95	97	104	106	112	151	132	122	150	198	135
	53.6667	94	95	104	95	97	94	107	109	117	150	135	124	152	199	138
	53.8333	95	93	104	96	97	94	105	105	112	149	132	124	148	196	132
	54	95	93	100	95	94	94	107	105	111	148	132	126	149	199	134
	54.1667	93	88	99	94	94	90	107	107	112	149	134	124	151	198	133
	54.3333	93	94	102	94	98	95	107	111	113	147	131	125	151	196	134
	54.5	91	93	103	97	99	94	108	107	110	146	130	125	149	196	134
	54.6667	94	93	100	97	96	97	107	109	112	150	135	126	152	193	133
	54.8333	95	93	100	93	96	93	106	108	112	149	133	125	151	196	129
	55	93	92	99	97	96	93	106	103	113	146	131	121	151	197	131
	55.1667	92	92	102	94	97	98	107	107	114	147	136	122	151	199	131
	55.3333	91	95	101	97	96	95	104	106	110	148	132	121	152	200	132
	55.5	94	93	100	94	96	94	106	109	114	147	130	124	148	199	130
	55.6667	92	93	103	96	96	99	109	110	113	147	132	124	150	200	134
	55.8333	90	95	104	97	97	95	109	110	110	146	134	126	151	199	132
	56	95	97	101	95	94	96	106	107	111	149	132	124	151	197	133
	56.1667	94	94	102	98	97	98	105	108	114	147	132	123	153	197	134
	56.3333	93	91	101	96	97	95	106	108	113	151	130	124	152	198	135
	56.5	92	92	105	97	95	98	108	109	112	145	133	125	149	200	130
	56.6667	93	92	102	94	98	96	107	106	113	147	134	124	151	198	133
	56.8333	93	92	104	98	99	94	108	110	115	151	134	127	151	197	133
	57	96	90	99	98	93	95	108	104	115	147	133	124	152	198	134
	57.1667	93	92	99	95	96	96	109	108	115	147	132	123	150	195	132
	57.3333	93	93	102	97	97	96	106	108	113	147	133	125	150	196	132
	57.5	92	93	103	97	97	95	106	110	114	147	132	126	150	195	135
	57.6667	95	98	101	95	98	95	107	110	113	150	131	128	152	198	135
	57.8333	93	91	104	95	98	97	106	108	111	148	133	124	150	195	134
	58	94	95	104	96	99	96	109	108	114	146	131	125	152	196	138
	58.1667	96	95	101	96	97	95	106	109	114	149	132	123	151	199	132
	58.3333	94	93	100	96	98	95	104	105	112	146	134	124	150	198	132
	58.5	92	93	102	93	97	94	105	109	115	149	131	124	151	195	135
	58.6667	93	94	102	96	98	94	107	109	116	150	133	123	150	196	136
	58.8333	93	96	101	97	98	96	109	107	115	146	133	125	155	195	133
	59	92	96	102	100	98	97	107	110	112	152	130	125	150	195	133
	59.1667	92	93	104	95	96	94	106	109	113	147	132	123	151	198	133
	59.3333	96	91	102	97	97	95	102	109	115	146	132	122	146	197	136
	59.5	91	93	101	98	97	96	110	107	114	145	134	122	153	192	133
	59.6667	94	96	101	98	97	95	107	104	114	148	134	125	153	199	133
	59.8333	92	93	103	97	96	92	106	110	113	151	134	125	151	197	131
	60	91	92	101	98	99	97	109	106	114	149	134	126	149	198	133
	60.1667	96	93	105	93	96	95	102	105	113	148	136	122	149	196	130
	60.3333	93	96	105	96	96	94	107	110	117	147	131	123	148	196	131
	60.5	91	93	100	97	97	97	109	107	116	151	135	127	148	198	133
	60.6667	96	93	104	96	98	96	106	110	117	151	135	124	152	195	136
	60.8333	94	92	101	95	97	97	106	108	112	148	136	128	148	196	132
	61	93	93	104	93	98	92	106	107	112	149	135	122	150	196	128
	61.1667	96	93	98	94	96	98	109	111	111	148	134	123	150	196	134
	61.3333	90	92	101	98	97	97	104	110	110	145	135	124	150	197	133
	61.5	93	97	103	96	99	96	105	107	113	150	137	124	154	200	135
	61.6667	92	94	101	94	98	95	103	113	111	149	135	126	147	200	135
	61.8333	95	95	104	97	94	93	106	111	110	147	135	123	153	199	132
	62	96	93	98	97	96	93	106	107	112	147	131	124	153	198	132
	62.1667	95	93	105	95	98	99	108	109	114	152	127	121	151	199	133
	62.3333	94	95	104	101	94	94	105	109	113	145	136	124	153	197	136
	62.5	97	96	103	99	97	100	107	110	113	145	131	127	147	198	136
	62.6667	91	97	105	93	96	96	107	107	116	150	133	127	150	194	133
	62.8333	99	98	102	95	97	95	109	105	109	147	135	124	150	199	133
	63	95	96	103	97	94	96	108	111	116	149	129	126	156	199	131
	63.1667	94	92	107	98	98	96	109	110	117	152	132	123	148	198	133
	63.3333	93	95	104	99	97	91	106	106	113	150	130	121	150	198	132
	63.5	92	91	102	95	95	93	105	108	112	148	137	127	151	198	130
	63.6667	93	93	107	101	97	94	105	106	114	150	131	127	152	195	131
	63.8333	96	93	104	96	98	98	110	108	113	149	130	124	154	197	137
	64	96	98	100	97	102	92	106	107	111	149	130	123	153	197	130
	64.1667	98	94	107	100	100	92	107	107	112	151	131	123	151	195	138
	64.3333	93	95	101	94	94	100	107	103	114	147	133	127	149	199	129
	64.5	92	89	103	100	96	93	104	110	119	142	132	125	146	197	136
	64.6667	93	95	104	93	99	93	104	107	113	147	131	123	149	197	132
	64.8333	90	90	102	95	100	99	107	104	112	150	133	122	150	198	135
	65	92	92	101	97	99	98	107	105	112	143	134	122	149	200	129
	65.1667	96	91	101	96	100	97	112	108	111	146	131	129	150	198	133
	65.3333	95	94	105	100	97	97	105	109	115	146	131	127	147	191	134
	65.5	95	97	102	96	100	95	110	112	115	147	133	126	151	202	130
	65.6667	92	93	100	91	92	93	104	108	112	144	132	127	154	200	131
	65.8333	90	98	102	96	97	93	105	106	112	149	135	123	147	199	131
	66	95	97	105	99	96	101	109	107	111	148	135	120	148	194	135
	66.1667	95	94	103	97	96	94	108	106	110	150	133	126	149	198	134
	66.3333	96	94	103	97	95	97	106	106	114	145	136	122	150	201	133
	66.5	93	93	101	96	94	95	103	107	107	145	133	129	145	199	129
	66.6667	93	98	101	93	93	92	108	112	115	151	129	122	147	200	133
	66.8333	99	91	99	93	98	93	106	111	111	148	133	125	150	199	136
	67	89	93	102	95	95	97	108	106	113	146	134	128	152	197	136
	67.1667	95	90	100	94	95	95	101	104	113	148	129	125	150	196	134
	67.3333	91	95	103	95	99	95	108	107	109	149	132	124	153	200	138
	67.5	93	92	103	95	95	96	109	109	111	148	130	124	149	197	135
	67.6667	91	91	104	94	96	98	108	111	111	147	130	129	153	200	135
	67.8333	95	94	106	98	97	99	105	111	116	146	134	125	149	202	129
	68	92	91	102	95	98	98	104	108	114	143	138	126	151	195	134
	68.1667	92	93	102	92	99	99	108	111	110	149	133	127	149	197	134
	68.3333	94	96	101	94	95	94	105	109	112	151	134	128	152	194	134
	68.5	91	92	105	90	93	99	103	105	114	149	129	123	151	196	132
	68.6667	97	95	104	101	100	99	108	110	110	150	129	126	157	194	133
	68.8333	91	94	100	95	94	92	103	105	115	146	136	127	153	195	129
	69	95	96	106	94	94	94	103	107	117	141	136	124	145	197	137
	69.1667	95	92	99	97	97	96	102	108	111	146	135	125	149	198	134
	69.3333	93	91	104	96	95	94	105	108	114	147	129	125	144	192	135
	69.5	95	94	101	92	98	95	104	111	113	144	130	126	145	196	131
	69.6667	98	93	105	94	96	96	105	110	111	145	134	127	148	199	132
	69.8333	90	90	96	96	97	93	109	105	111	149	133	123	148	197	134
	70	95	95	99	98	99	96	106	104	107	150	134	124	153	194	131
	70.1667	90	96	101	96	96	98	105	104	114	146	131	127	153	192	132
	70.3333	91	93	101	99	93	101	106	105	115	146	136	127	150	193	135
	70.5	96	100	99	97	99	95	112	109	114	151	134	124	149	196	127
	70.6667	90	90	101	95	96	97	109	106	119	149	138	123	152	196	134
	70.8333	91	96	104	99	99	94	108	110	117	148	131	124	149	201	136
	71	93	91	103	90	98	93	102	112	115	152	131	125	148	196	136
	71.1667	92	94	101	96	94	94	103	106	112	144	137	126	147	191	136
	71.3333	98	90	103	98	93	99	106	107	116	150	132	121	150	193	129
	71.5	91	91	100	93	92	95	108	108	115	144	131	121	153	197	133
	71.6667	97	97	103	99	95	95	108	107	110	145	134	120	151	196	133
	71.8333	96	95	105	95	94	96	106	109	111	150	137	125	148	195	131
	72	93	93	99	96	96	95	108	108	115	150	136	127	147	200	130
	72.1667	90	96	104	94	94	95	103	108	111	151	134	124	155	195	131
	72.3333	94	91	103	95	95	97	105	105	114	150	136	124	147	198	133
	72.5	92	94	100	94	95	96	105	107	111	148	135	124	148	198	133
	72.6667	99	97	104	92	94	97	110	110	111	145	136	125	152	193	134
	72.8333	97	95	100	97	94	96	106	107	111	150	132	127	149	194	131
	73	90	93	101	95	97	98	105	111	118	152	133	121	148	198	133
	73.1667	92	96	103	100	96	96	103	107	111	151	133	122	151	195	131
	73.3333	97	96	100	95	93	96	109	107	115	148	130	125	149	196	130
	73.5	90	95	100	91	100	92	108	107	113	149	136	120	151	194	130
	73.6667	91	94	108	96	91	94	107	105	110	148	126	123	149	191	132
	73.8333	91	94	108	96	91	94	107	105	110	148	126	123	149	191	132
	74	100	91	101	100	93	97	109	103	116	143	131	124	151	196	131
	74.1667	95	94	103	92	95	88	109	111	116	150	132	125	148	195	130
	74.3333	97	90	98	95	95	93	110	104	113	152	135	129	152	195	133
	74.5	96	93	99	90	100	96	102	104	116	148	130	125	149	198	132
	74.6667	93	93	106	98	95	97	105	107	111	151	132	123	150	196	137
	74.8333	90	89	101	95	93	94	105	106	115	150	133	124	147	194	132
	75	95	91	101	99	94	94	107	110	114	151	135	119	150	200	130
	75.1667	96	91	103	96	95	94	104	107	112	151	132	122	151	200	131
	75.3333	93	94	100	94	103	97	105	108	113	151	129	125	146	192	135
	75.5	93	94	99	98	95	98	108	110	115	147	132	123	147	201	133
	75.6667	93	94	105	93	98	92	104	103	113	148	132	122	146	196	134
	75.8333	93	96	101	95	101	94	107	110	110	147	133	121	152	196	132
	76	96	95	97	99	96	95	111	105	109	146	133	128	152	196	130
	76.1667	91	93	100	96	98	95	107	104	112	146	135	128	147	191	134
	76.3333	94	92	104	98	99	94	104	109	113	152	131	120	149	198	135
	76.5	95	94	100	95	100	98	107	106	114	151	135	125	151	192	131
	76.6667	93	91	101	99	99	97	105	107	117	150	134	124	148	197	129
	76.8333	91	95	105	98	91	95	106	106	113	143	128	123	149	196	131
	77	91	95	101	98	98	94	106	109	118	152	133	119	150	191	132
	77.1667	95	91	102	97	98	96	106	105	116	148	128	122	150	190	131
	77.3333	94	92	102	95	94	94	104	106	113	149	132	128	147	194	133
	77.5	91	94	102	94	97	97	106	103	109	151	130	123	146	192	133
	77.6667	91	91	101	99	94	98	109	103	111	151	134	125	151	193	132
	77.8333	93	91	105	95	97	94	109	109	115	148	130	124	146	194	133
	78	96	89	100	96	95	94	105	106	108	146	131	124	144	190	133
	78.1667	96	93	105	95	97	95	105	109	112	145	132	122	151	196	134
	78.3333	95	92	105	95	93	94	106	106	114	144	132	123	146	199	129
	78.5	92	98	102	96	98	97	101	107	112	150	132	124	144	195	131
	78.6667	94	94	99	95	94	92	103	105	109	148	134	123	149	195	133
	78.8333	93	94	106	98	98	98	106	109	111	149	132	124	148	192	132
	79	93	92	99	95	95	97	105	106	112	150	134	125	148	198	130
	79.1667	93	98	101	95	95	98	106	107	115	145	129	121	143	196	132
	79.3333	91	91	107	94	95	96	102	108	110	146	134	120	149	194	133
	79.5	98	94	102	99	100	97	109	108	112	150	131	126	148	198	130
	79.6667	94	94	104	95	98	94	108	108	110	149	127	119	146	195	132
	79.8333	89	93	102	98	94	97	105	107	112	145	135	124	154	194	131
	80	94	91	103	98	98	97	100	107	114	145	132	124	146	195	128
	80.1667	95	88	103	96	97	95	104	108	112	145	130	124	149	193	127
	80.3333	95	97	100	101	97	94	105	106	116	148	131	122	151	193	129
	80.5	90	98	104	96	95	95	103	106	110	148	131	121	145	196	132
	80.6667	96	95	102	96	96	99	105	104	114	143	131	125	145	195	128
	80.8333	92	91	104	98	96	93	106	103	112	150	131	123	151	194	129
	81	96	92	109	97	97	97	110	105	115	151	129	127	150	200	132
	81.1667	90	92	97	97	100	93	106	102	110	147	128	124	148	193	134
	81.3333	95	93	102	96	97	98	107	110	114	145	132	123	152	197	133
	81.5	94	95	100	95	96	92	107	113	112	143	134	125	150	199	133
	81.6667	91	93	104	96	98	93	107	107	115	152	130	124	146	193	129
	81.8333	98	94	99	100	97	99	104	111	116	144	129	127	147	197	129
	82	98	97	100	99	96	97	108	104	114	144	130	119	147	199	132
	82.1667	92	92	104	90	96	97	104	104	115	142	134	122	151	191	133
	82.3333	92	96	102	92	98	97	106	102	108	145	132	127	144	198	134
	82.5	92	92	102	98	96	98	105	106	114	148	130	126	148	194	128
	82.6667	96	94	102	92	98	97	105	110	115	150	128	124	149	191	135
	82.8333	95	91	107	99	97	96	101	109	114	152	133	122	152	195	131
	83	89	90	106	97	96	93	106	105	111	149	135	122	149	193	132
	83.1667	98	95	101	98	97	89	103	105	112	147	131	122	152	197	133
	83.3333	95	89	105	98	98	93	106	108	112	149	130	119	149	195	131
	83.5	92	98	102	97	99	97	108	103	112	145	126	126	152	192	133
	83.6667	94	90	102	99	96	92	110	108	114	147	130	122	154	196	128
	83.8333	90	91	106	91	93	95	103	108	113	146	127	126	145	194	129
	84	92	92	101	93	97	97	104	106	112	151	128	122	149	194	130
	84.1667	94	92	102	99	94	91	107	106	112	146	130	120	150	196	135
	84.3333	93	92	107	93	93	99	105	109	117	141	136	124	148	195	130
	84.5	94	93	104	93	99	92	108	107	118	147	133	126	146	196	130
	84.6667	95	93	98	92	97	94	102	105	111	144	130	122	148	192	129
	84.8333	92	95	106	98	93	98	105	107	109	149	130	126	148	201	130
	85	97	95	101	95	95	95	106	107	111	148	127	125	141	190	129
	85.1667	94	92	101	98	91	90	104	106	114	144	131	127	151	198	130
	85.3333	93	93	104	92	98	94	103	107	112	147	131	122	148	193	131
	85.5	93	91	97	95	93	94	106	106	113	148	127	122	150	192	135
	85.6667	91	98	101	95	95	96	107	113	114	150	130	125	150	194	135
	85.8333	95	91	99	96	94	93	106	104	107	144	130	123	151	199	130
	86	98	96	107	99	95	92	108	104	116	144	129	121	148	197	131
	86.1667	94	90	104	97	98	96	109	105	110	146	129	118	151	194	132
	86.3333	94	94	100	96	102	96	103	104	113	147	133	129	146	194	126
	86.5	94	93	98	96	99	96	108	112	116	147	132	128	146	197	135
	86.6667	90	96	105	93	93	89	108	107	114	143	131	126	152	195	130
	86.8333	97	96	102	93	98	97	109	107	114	146	129	124	146	200	129
	87	89	91	103	97	96	98	108	105	115	145	135	130	146	189	133
	87.1667	93	92	102	99	90	96	104	107	109	144	129	119	146	190	131
	87.3333	96	90	105	99	100	95	103	103	115	144	136	123	150	196	130
	87.5	94	91	101	97	98	100	107	102	109	147	131	121	152	189	132
	87.6667	95	95	102	98	96	96	105	111	117	143	132	123	150	194	131
	87.8333	93	92	105	98	101	100	106	107	113	149	133	123	147	193	137
	88	98	93	101	98	95	92	102	110	113	149	129	119	149	195	130
	88.1667	92	92	99	99	97	93	102	110	111	146	131	122	152	191	126
	88.3333	95	97	107	94	99	97	109	111	117	152	133	124	150	197	131
	88.5	93	97	104	99	89	96	110	111	115	144	133	126	150	197	134
	88.6667	96	96	104	96	98	91	107	109	111	144	131	126	150	196	135
	88.8333	93	93	104	97	101	91	108	107	109	144	132	123	149	193	133
	89	90	97	102	93	95	92	108	106	114	150	129	121	148	197	132
	89.1667	92	90	102	94	99	95	107	106	108	145	131	121	150	198	133
	89.3333	95	92	100	96	97	96	107	106	111	148	132	119	144	192	129
	89.5	97	92	102	100	94	88	103	108	112	143	131	123	145	196	134
	89.6667	91	93	104	93	97	97	103	106	110	147	136	122	152	191	132
	89.8333	95	95	105	98	91	98	107	108	114	149	134	124	148	201	129
	90	92	90	102	97	99	90	108	105	111	147	128	120	147	195	133
	90.1667	97	92	100	93	93	92	109	106	113	147	129	119	153	191	131
	90.3333	96	97	102	101	95	97	106	105	116	147	132	121	148	199	134
	90.5	91	95	101	95	97	92	106	106	114	148	131	121	149	194	129
	90.6667	93	91	102	95	95	96	106	110	113	149	135	125	146	193	128
	90.8333	90	95	99	93	96	96	105	108	110	144	130	123	148	196	132
	91	94	95	101	96	96	96	104	108	113	145	133	122	149	194	131
	91.1667	93	94	105	93	98	96	105	106	114	150	128	122	150	194	130
	91.3333	95	97	104	94	99	93	104	107	114	147	136	121	149	196	132
	91.5	94	92	99	95	99	93	105	108	112	147	130	128	150	194	133
	91.6667	94	94	105	98	100	94	107	112	113	146	128	124	151	194	132
	91.8333	92	92	100	96	92	95	110	104	112	146	129	127	151	197	132
	92	94	92	104	100	95	92	103	109	111	146	132	121	147	195	131
	92.1667	91	96	100	93	93	94	105	109	113	144	131	127	145	192	132
	92.3333	97	93	99	94	94	94	106	108	113	147	131	127	147	195	130
	92.5	97	95	103	96	96	99	110	109	111	151	133	122	150	191	133
	92.6667	94	92	104	94	96	95	106	107	118	146	133	126	146	192	133
	92.8333	92	93	102	96	95	92	104	106	110	145	130	123	146	195	131
	93	96	95	107	98	98	96	107	107	110	146	129	123	146	197	130
	93.1667	95	94	102	97	94	98	107	107	112	149	134	128	149	193	134
	93.3333	95	95	102	97	98	98	106	107	113	145	130	122	149	195	133
	93.5	97	97	106	92	97	94	109	109	115	145	132	120	147	192	135
	93.6667	93	95	104	97	93	96	107	107	114	148	130	123	147	197	131
	93.8333	93	92	103	98	95	94	106	110	109	143	130	125	150	199	131
	94	93	96	102	97	93	93	105	110	115	150	133	122	150	192	131
	94.1667	95	93	104	95	99	95	108	108	112	144	133	125	145	192	133
	94.3333	96	96	100	96	93	97	104	106	117	144	131	124	148	193	130
	94.5	92	97	102	99	95	96	106	104	111	146	129	126	151	199	131
	94.6667	94	95	105	95	97	98	102	105	117	148	131	119	149	195	126
	94.8333	96	91	100	97	97	96	108	109	110	150	135	126	151	192	132
	95	93	92	105	96	95	94	106	109	110	145	131	121	147	198	128
	95.1667	95	94	101	99	99	99	108	109	116	145	132	127	149	201	131
	95.3333	89	94	107	96	97	93	109	110	105	149	131	125	150	194	131
	95.5	95	92	103	95	99	95	103	107	114	145	131	128	144	193	133
	95.6667	92	91	101	99	93	95	108	105	113	146	133	120	152	192	128
	95.8333	94	98	107	102	99	99	107	107	111	150	127	125	149	194	132
	96	94	95	102	96	98	97	105	108	115	147	133	126	148	193	127
	96.1667	95	91	105	93	100	98	105	108	111	145	133	124	146	194	129
	96.3333	93	89	104	98	94	99	104	110	110	145	136	122	147	194	132
	96.5	97	100	104	99	97	96	109	109	109	152	131	122	144	193	130
	96.6667	99	96	100	95	96	90	105	111	110	150	133	127	147	192	129
	96.8333	94	93	102	95	96	96	108	108	113	141	135	123	154	197	127
	97	89	92	102	98	97	91	102	106	115	146	128	120	147	196	131
	97.1667	96	88	105	98	91	92	103	108	114	147	135	123	149	193	131
	97.3333	93	94	102	98	97	98	107	109	117	147	131	125	149	197	133
	97.5	98	93	100	92	96	98	109	106	114	145	129	120	150	197	136
	97.6667	93	91	104	99	97	97	104	104	119	147	132	124	154	197	136
	97.8333	95	98	99	97	98	93	102	109	112	153	132	124	151	195	132
	98	94	96	102	97	95	99	109	105	110	148	132	128	153	196	133
	98.1667	97	91	100	94	91	93	106	111	114	146	128	118	143	191	132
	98.3333	93	92	101	95	94	94	102	107	112	146	130	124	149	196	132
	98.5	95	90	105	96	98	95	104	108	118	150	130	122	149	199	127
	98.6667	90	91	103	97	98	95	107	107	115	149	130	124	146	195	130
	98.8333	96	96	101	95	91	93	110	109	111	148	128	121	148	197	130
	99	92	93	104	93	97	92	104	110	113	145	126	124	147	192	131
	99.1667	91	91	103	89	94	94	106	105	113	143	131	117	144	191	130
	99.3333	96	91	103	100	97	90	106	107	108	140	133	121	143	195	130
	99.5	95	92	101	98	98	96	110	110	110	149	125	128	146	196	130
	99.6667	93	96	105	92	97	97	106	106	113	149	129	124	143	192	135
	99.8333	95	91	101	95	98	96	102	109	110	147	132	121	145	197	128
	100	95	94	103	97	95	95	106	106	115	148	131	123	146	193	134
	100.167	90	89	99	101	96	95	107	110	109	146	133	119	149	199	130
	100.333	95	93	101	97	96	96	108	110	114	144	129	122	152	195	139
	100.5	91	93	103	96	95	95	109	104	116	145	137	121	147	196	131
	100.667	93	96	106	93	98	98	110	110	116	143	134	117	145	196	128
	100.833	91	89	103	95	98	95	106	110	113	145	135	123	149	196	127
	101	95	94	106	93	94	92	103	106	108	150	135	128	146	195	130
	101.167	94	96	99	93	96	100	103	105	116	151	134	129	149	193	127
	101.333	95	93	102	96	97	98	105	105	112	145	131	128	151	189	132
	101.5	94	93	105	100	97	98	104	111	111	144	134	127	153	196	130
	101.667	91	96	104	97	96	96	104	109	114	147	131	120	147	197	136
	101.833	97	95	101	101	93	96	110	103	114	143	133	122	152	191	134
	102	94	97	105	94	97	93	106	105	112	145	131	128	147	196	135
	102.167	94	95	106	95	96	98	106	105	114	148	130	127	148	194	130
	102.333	90	91	101	94	100	100	108	106	115	143	131	124	149	198	132
	102.5	91	94	100	96	94	96	106	108	114	145	134	120	148	195	133
	102.667	98	90	105	101	95	98	105	107	107	147	131	121	149	193	134
	102.833	90	98	105	95	98	90	102	104	115	144	131	125	152	197	131
	103	92	93	99	98	95	93	109	106	112	149	131	128	146	198	134
	103.167	92	88	105	99	92	97	106	105	109	147	129	126	146	193	126
	103.333	90	95	102	94	96	93	107	112	109	148	132	122	152	192	133
	103.5	93	90	101	99	99	93	109	112	111	144	130	124	144	195	129
	103.667	89	93	98	92	91	91	103	109	111	150	135	124	149	197	133
	103.833	92	91	99	95	95	98	104	105	108	148	129	124	143	192	130
	104	92	99	106	100	97	93	108	106	115	149	127	122	149	201	136
	104.167	93	94	102	96	101	95	106	108	115	150	135	125	148	196	129
	104.333	89	95	99	101	95	92	101	108	113	145	128	122	146	196	127
	104.5	96	93	104	95	94	97	104	111	114	148	135	123	150	193	132
	104.667	88	93	99	95	92	97	103	107	108	144	132	120	152	198	136
	104.833	96	91	103	104	100	96	105	108	113	151	132	127	149	191	130
	105	91	96	96	98	97	95	105	105	115	141	129	123	149	192	128
	105.167	95	95	100	93	98	91	106	110	115	143	134	125	148	196	132
	105.333	93	91	103	100	96	95	107	106	107	144	132	118	152	200	134
	105.5	92	96	104	96	98	92	105	106	113	146	128	127	149	201	137
	105.667	89	91	105	95	98	90	109	106	119	141	134	120	150	192	128
	105.833	97	91	99	92	97	94	109	109	115	146	133	122	150	198	129
	106	93	95	102	95	94	91	101	104	116	147	129	126	146	199	130
	106.167	90	97	105	103	95	97	108	108	112	141	134	129	143	194	134
	106.333	96	99	101	97	98	93	111	109	114	144	132	126	152	194	133
	106.5	92	93	101	94	96	95	105	107	114	147	128	125	149	190	129
	106.667	94	91	99	92	94	96	110	106	108	143	131	126	151	197	128
	106.833	96	90	98	97	96	99	107	110	112	145	135	123	147	191	130
	107	91	92	103	98	102	95	107	104	115	144	133	126	151	194	130
	107.167	92	96	98	98	98	94	110	107	114	145	130	118	147	193	132
	107.333	98	97	103	98	98	97	104	113	114	149	135	123	145	198	131
	107.5	99	96	104	96	94	97	109	105	115	145	128	125	149	192	131
	107.667	96	96	103	95	99	94	108	110	110	144	133	123	150	196	127
	107.833	95	96	105	100	100	97	101	109	113	147	135	120	154	196	131
	108	94	98	100	97	96	98	105	103	114	144	132	122	154	193	133
	108.167	94	94	103	97	94	95	105	108	116	147	132	126	143	191	127
	108.333	95	94	99	91	94	91	104	107	111	144	132	123	148	196	130
	108.5	96	98	100	100	96	96	104	109	113	144	131	121	147	194	131
	108.667	91	91	101	94	99	96	108	111	112	147	131	125	151	193	130
	108.833	91	94	103	97	96	96	108	109	114	146	134	122	146	192	131
	109	92	95	102	92	95	95	102	110	109	143	128	124	144	192	129
	109.167	96	92	103	95	93	97	108	110	112	147	130	124	143	195	129
	109.333	98	97	106	97	98	96	106	109	113	144	131	126	147	196	127
	109.5	90	96	102	97	95	96	102	108	111	146	132	125	149	192	133
	109.667	97	95	102	97	96	97	109	110	112	148	131	127	146	199	130
	109.833	89	91	102	95	99	96	107	106	114	151	132	122	145	194	131
	110	93	92	99	94	94	93	106	108	115	147	130	122	146	197	131
	110.167	92	100	100	99	96	100	108	110	116	147	132	125	145	193	132
	110.333	92	93	102	99	99	96	106	110	116	147	131	122	150	198	131
	110.5	98	94	103	95	96	98	105	107	115	149	131	124	146	192	129
	110.667	91	93	100	99	99	91	106	107	112	145	129	121	148	197	130
	110.833	96	93	102	95	97	94	104	109	112	149	131	123	146	199	130
	111	97	94	101	93	99	96	104	108	114	147	131	122	148	196	128
	111.167	95	95	101	95	99	97	105	107	116	146	134	121	150	195	130
	111.333	91	91	104	97	97	95	105	108	113	143	135	122	145	194	131
	111.5	94	91	100	96	98	97	107	109	116	146	131	125	149	195	129
	111.667	96	94	101	96	97	94	105	111	112	148	133	123	147	192	129
	111.833	91	92	102	97	96	95	105	106	118	146	128	123	145	195	129
	112	96	95	102	96	98	93	105	107	114	143	131	122	146	194	131
	112.167	94	93	100	95	97	98	108	107	114	144	129	126	146	195	129
	112.333	93	94	103	99	99	93	110	109	115	146	133	125	147	195	130
	112.5	97	93	102	94	95	94	106	109	110	145	136	123	146	193	130
	112.667	94	92	101	94	97	95	105	108	114	146	130	122	150	193	130
	112.833	97	91	103	97	96	95	106	107	112	151	131	127	147	193	129
	113	95	92	105	99	96	95	105	105	112	144	133	122	151	194	131
	113.167	92	92	99	95	97	97	107	111	113	144	129	121	147	193	127
	113.333	95	93	104	96	99	95	105	107	115	146	131	122	147	196	129
	113.5	91	93	103	98	96	94	104	111	115	147	130	124	147	197	130
	113.667	95	92	103	97	97	98	103	110	114	145	134	124	149	195	132
	113.833	95	90	103	94	94	96	105	108	111	148	132	124	149	195	131
	114	94	91	101	99	97	95	105	109	111	147	133	123	150	196	129
	114.167	93	94	99	97	98	93	102	108	112	146	134	121	147	191	128
	114.333	94	93	105	97	96	98	106	108	115	146	134	124	147	197	130
	114.5	94	92	102	99	97	95	107	109	117	149	129	123	147	197	133
	114.667	92	93	102	99	97	97	107	106	112	144	133	124	147	196	132
	114.833	94	96	104	97	96	96	105	109	117	145	132	123	147	198	131
	115	90	93	101	96	96	95	104	108	114	145	131	124	146	201	128
	115.167	93	93	104	97	97	97	106	109	115	142	131	126	147	192	128
	115.333	96	94	101	96	97	96	104	113	113	144	132	124	148	193	129
	115.5	96	94	98	96	94	96	106	107	113	151	133	123	148	197	129
	115.667	97	93	104	94	96	96	107	106	115	145	134	124	149	192	129
	115.833	94	96	102	95	99	97	107	109	116	147	132	122	149	194	129
	116	96	93	101	97	93	96	105	108	113	147	132	123	150	195	127
	116.167	95	92	104	99	100	97	102	108	113	145	131	122	151	195	131
	116.333	93	96	103	97	96	94	106	110	111	145	133	125	147	198	132
	116.5	96	90	104	98	97	93	110	109	115	146	132	123	149	195	130
	116.667	95	94	105	96	97	95	105	108	112	147	133	126	148	197	131
	116.833	94	96	103	96	97	96	108	109	114	144	133	125	146	195	129
	117	92	94	101	93	98	95	108	106	114	148	130	126	148	198	130
	117.167	94	92	102	95	98	95	104	108	113	147	131	122	147	193	132
	117.333	93	94	102	96	96	94	105	106	117	147	129	122	149	193	130
	117.5	96	95	105	98	97	95	108	108	116	146	131	124	149	195	134
	117.667	93	95	100	96	98	95	107	106	113	147	133	121	146	191	132
	117.833	93	94	103	95	97	97	105	106	113	145	130	123	149	192	130
	118	96	95	103	97	95	95	107	107	113	150	130	124	149	196	130
	118.167	95	91	102	97	95	94	107	106	113	145	131	124	145	193	131
	118.333	94	92	101	96	97	97	106	107	114	148	134	122	150	194	132
	118.5	96	91	107	97	98	98	107	109	114	147	134	124	149	196	131
	118.667	94	93	103	99	97	97	109	107	114	149	131	129	150	193	129

## Sheet: Fig. S1d
PSMβ1 kinetics
		PSMβ1 monomeric concentration
	Time (h)	0.05 mg/ml	0.05 mg/ml	0.05 mg/ml	0.075 mg/ml	0.075 mg/ml	0.075 mg/ml	0.1 mg/ml	0.1 mg/ml	0.1 mg/ml	0.15 mg/ml	0.15 mg/ml	0.15 mg/ml	0.20 mg/ml	0.20 mg/ml	0.20 mg/ml	0.25 mg/ml	0.25 mg/ml	0.25 mg/ml
	0	194	192	185	225	225	223	261	253	246	286	278	281	304	304	305	319	311	327
	0.166667	142	135	128	173	177	167	198	195	193	230	226	224	256	248	252	269	263	277
	0.333333	129	121	113	166	169	158	193	189	185	221	220	223	243	240	239	250	243	256
	0.5	129	117	113	159	167	156	200	189	184	219	225	232	243	238	239	238	234	252
	0.666667	123	113	111	154	167	155	192	187	182	229	245	260	255	245	249	236	232	251
	0.833333	128	113	112	156	169	158	196	197	190	252	276	300	271	274	289	249	233	261
	1	125	114	114	159	172	164	199	206	199	292	318	339	324	328	348	287	256	289
	1.16667	129	116	112	163	177	167	201	218	211	328	353	373	380	383	410	353	322	359
	1.33333	129	116	109	167	191	173	208	244	231	368	377	396	418	429	445	423	396	419
	1.5	132	116	113	175	199	177	221	265	251	391	391	414	455	460	477	469	450	475
	1.66667	131	118	115	183	211	190	241	285	265	411	405	427	479	480	498	496	487	505
	1.83333	137	117	119	200	225	207	258	305	287	424	419	436	501	497	510	517	504	523
	2	138	118	120	209	245	212	279	315	304	432	430	441	504	503	513	525	513	541
	2.16667	140	119	118	231	257	226	291	326	307	442	433	447	519	508	523	530	522	551
	2.33333	142	114	120	236	267	238	299	339	322	449	441	450	518	519	528	538	533	562
	2.5	145	117	124	249	277	245	309	339	323	453	450	451	528	521	528	543	531	567
	2.66667	142	125	127	257	288	255	313	345	324	452	441	454	529	527	531	541	535	576
	2.83333	149	125	124	265	293	260	320	345	330	452	449	456	530	523	529	539	529	576
	3	152	131	128	266	291	264	325	342	333	453	449	455	528	529	535	540	532	580
	3.16667	157	129	127	275	294	270	323	353	335	452	450	460	532	531	539	546	541	582
	3.33333	156	131	130	271	295	273	324	350	326	447	445	455	535	522	536	544	532	581
	3.5	162	136	138	273	294	275	327	350	329	453	449	459	532	528	527	543	532	581
	3.66667	165	134	135	274	297	277	324	352	327	451	445	453	536	533	532	545	533	579
	3.83333	175	138	143	279	301	280	326	349	331	451	448	456	532	532	530	544	533	578
	4	174	141	139	280	298	279	327	346	328	449	446	449	533	533	531	544	535	584
	4.16667	178	142	146	278	297	278	328	349	330	444	443	451	533	531	531	543	530	586
	4.33333	183	147	149	280	300	280	329	348	330	442	442	447	538	530	522	544	533	586
	4.5	184	148	148	278	300	282	326	345	329	442	439	450	530	525	521	544	526	584
	4.66667	188	148	154	279	300	282	327	343	326	440	438	448	533	526	529	549	532	588
	4.83333	190	154	157	280	300	285	324	344	325	437	432	445	523	523	524	543	530	589
	5	193	159	162	276	301	282	326	339	324	432	431	439	523	526	519	541	532	580
	5.16667	195	161	165	275	298	286	327	343	322	439	432	441	525	524	517	540	531	593
	5.33333	200	160	168	281	300	284	324	334	324	434	428	441	527	519	518	542	530	584
	5.5	199	164	170	275	294	282	322	340	317	438	426	430	517	518	515	538	527	588
	5.66667	200	167	176	279	298	284	320	339	321	429	423	439	520	517	520	540	528	587
	5.83333	200	170	176	276	300	283	323	336	319	425	424	433	520	515	518	544	528	581
	6	201	176	178	276	297	287	325	339	318	427	423	429	520	515	518	543	527	586
	6.16667	206	174	182	274	293	280	320	341	318	423	421	428	516	515	515	540	527	586
	6.33333	210	176	185	280	295	286	324	335	317	425	418	428	517	516	508	543	528	589
	6.5	210	184	187	274	299	283	322	337	317	423	420	429	517	517	515	537	528	583
	6.66667	212	180	187	281	294	285	323	337	317	413	416	420	515	511	510	539	527	585
	6.83333	217	190	189	277	293	282	325	338	319	416	414	427	512	506	510	540	523	584
	7	220	186	196	280	294	284	321	337	313	423	410	421	514	506	510	546	517	585
	7.16667	215	184	198	280	298	283	321	333	313	422	415	418	507	503	505	541	523	582
	7.33333	223	190	199	284	297	285	319	333	314	414	412	420	508	510	508	539	518	577
	7.5	227	196	201	280	293	283	326	336	315	411	412	415	509	500	502	532	524	584
	7.66667	223	192	200	283	293	285	325	332	315	413	411	418	500	500	506	537	520	581
	7.83333	224	195	208	281	295	288	321	332	315	412	406	413	500	502	503	537	520	579
	8	229	197	201	282	296	281	320	332	316	409	405	413	503	497	500	537	518	577
	8.16667	226	194	202	285	293	285	318	333	315	406	402	407	498	499	498	536	519	581
	8.33333	228	199	206	280	295	284	325	333	312	403	408	410	496	495	502	535	518	582
	8.5	230	200	206	282	293	286	324	331	312	407	401	406	503	501	499	534	523	574
	8.66667	232	199	214	281	293	283	316	336	310	404	402	408	500	499	501	536	516	581
	8.83333	230	204	209	282	294	284	320	331	315	401	402	408	495	500	492	531	516	584
	9	231	207	212	282	294	285	318	332	312	407	399	408	498	494	497	535	520	578
	9.16667	234	202	210	284	293	284	318	333	307	399	397	403	495	492	498	529	516	575
	9.33333	232	204	212	278	295	283	311	331	312	402	397	405	499	492	498	533	517	579
	9.5	238	205	212	281	289	284	315	331	312	402	398	407	491	488	499	533	517	582
	9.66667	232	209	217	283	293	287	320	333	312	397	391	405	494	485	496	528	518	574
	9.83333	235	207	216	279	293	285	320	335	316	401	392	406	499	486	489	530	507	573
	10	232	209	216	283	290	287	315	334	308	395	396	401	493	491	491	532	522	576
	10.1667	234	205	215	280	293	284	322	327	311	394	396	402	485	486	493	531	521	574
	10.3333	233	212	214	286	293	286	319	331	312	398	397	397	492	484	492	532	513	578
	10.5	235	209	219	280	290	290	322	332	309	399	390	392	487	482	492	536	514	578
	10.6667	232	210	218	281	295	282	318	330	310	400	390	398	487	487	492	533	520	576
	10.8333	236	215	222	281	288	285	323	330	309	392	395	399	488	489	489	533	510	576
	11	237	213	222	284	295	284	317	332	311	396	394	401	488	487	488	532	518	575
	11.1667	235	217	219	283	293	287	316	329	308	393	391	398	487	480	486	528	515	572
	11.3333	238	213	218	282	294	289	320	335	307	393	390	401	487	485	490	534	513	574
	11.5	240	215	226	282	293	289	323	333	313	392	392	396	489	478	486	531	512	574
	11.6667	238	212	222	282	294	290	319	335	311	398	385	396	482	481	493	532	514	573
	11.8333	242	213	227	284	290	284	318	333	309	393	388	396	488	486	485	529	515	574
	12	241	213	227	278	290	285	316	334	309	391	389	394	485	483	493	525	513	576
	12.1667	238	216	222	284	291	286	325	336	309	394	390	397	487	476	489	529	518	572
	12.3333	238	217	225	282	290	286	324	333	313	387	393	392	487	481	482	529	514	571
	12.5	243	223	224	283	297	289	321	333	310	392	389	396	485	483	485	530	519	571
	12.6667	235	224	224	281	292	288	320	334	309	388	387	394	485	480	489	533	516	579
	12.8333	242	220	228	282	290	290	316	335	310	396	384	389	485	475	490	527	516	573
	13	237	221	226	279	289	289	320	333	310	386	392	397	487	483	489	528	521	571
	13.1667	241	220	226	281	293	288	324	336	311	394	384	392	491	474	490	534	519	573
	13.3333	239	220	230	282	293	290	325	337	314	391	387	397	484	478	483	532	522	569
	13.5	239	221	225	284	296	285	320	331	308	391	391	392	482	479	487	530	520	575
	13.6667	242	224	231	284	291	288	325	338	313	389	385	391	485	476	484	529	513	569
	13.8333	241	225	228	286	290	288	317	334	308	392	388	397	481	476	484	528	517	573
	14	241	219	228	286	291	288	323	336	309	389	391	392	480	473	488	526	517	574
	14.1667	241	227	230	281	296	292	322	333	306	389	390	393	477	476	490	531	522	572
	14.3333	239	226	231	279	293	294	323	336	306	389	386	395	485	478	487	530	517	572
	14.5	241	226	233	281	292	290	326	336	309	387	385	391	484	477	484	529	514	572
	14.6667	241	229	231	283	294	293	325	334	312	387	384	392	483	476	485	528	520	572
	14.8333	236	228	231	283	291	294	324	337	310	386	381	389	483	470	486	526	519	571
	15	246	229	234	284	292	291	327	335	309	388	383	395	481	476	484	529	521	570
	15.1667	246	233	233	281	294	290	322	336	308	388	383	387	483	484	490	531	525	570
	15.3333	242	231	233	280	296	292	325	334	310	386	390	392	482	474	488	533	521	577
	15.5	244	230	234	282	286	290	323	333	305	385	386	392	485	481	488	531	519	575
	15.6667	242	232	232	283	289	294	325	335	307	386	384	392	479	481	487	531	528	572
	15.8333	242	235	232	282	296	294	328	341	309	385	384	394	481	473	488	532	521	571
	16	239	233	236	282	291	290	326	336	307	384	387	393	482	476	484	523	522	573
	16.1667	242	235	238	283	290	293	326	336	307	387	383	395	481	477	489	529	525	571
	16.3333	248	235	229	279	294	290	324	339	308	387	384	389	484	479	486	531	524	571
	16.5	246	235	236	283	291	292	326	337	308	389	384	388	481	480	484	529	523	575
	16.6667	245	238	238	283	292	293	325	335	308	390	388	391	484	481	485	527	521	568
	16.8333	242	241	240	282	291	295	324	336	310	387	387	394	490	474	485	522	525	575
	17	246	236	239	282	289	295	331	341	308	386	383	393	486	479	490	528	522	573
	17.1667	247	239	238	279	293	295	327	339	312	383	379	387	481	480	487	533	518	569
	17.3333	241	241	234	280	295	291	325	338	308	382	387	390	486	474	486	530	525	572
	17.5	245	241	239	285	292	298	325	339	310	385	384	393	486	477	489	529	518	573
	17.6667	245	241	243	283	290	296	326	336	311	388	387	389	487	476	488	529	523	569
	17.8333	252	239	241	281	291	296	331	336	311	386	385	394	483	479	488	529	527	569
	18	247	242	244	281	294	294	329	339	306	387	387	395	486	471	483	527	524	575
	18.1667	250	244	241	281	294	296	327	337	313	386	382	392	485	475	483	532	527	573
	18.3333	246	238	242	280	294	298	322	337	311	388	387	394	483	477	486	528	518	567
	18.5	251	244	242	281	293	293	332	339	309	387	382	390	486	477	491	525	525	574
	18.6667	251	246	241	284	292	295	332	341	310	386	381	393	484	476	483	532	524	564
	18.8333	246	249	243	280	290	297	331	340	312	386	386	391	481	474	486	529	524	570
	19	247	247	245	281	294	294	324	336	310	388	385	393	480	477	482	533	525	569
	19.1667	252	249	247	283	291	296	329	336	306	386	385	391	485	471	492	526	523	572
	19.3333	249	249	246	283	294	301	328	341	313	382	385	393	483	478	484	532	527	571
	19.5	247	246	246	280	291	300	330	334	314	390	379	393	478	476	490	532	524	569
	19.6667	251	251	245	284	294	298	333	339	307	385	385	391	483	478	484	531	520	572
	19.8333	250	247	247	280	293	299	332	337	306	385	385	390	484	474	488	528	526	568
	20	254	253	245	283	294	301	332	342	309	384	380	391	485	476	486	531	531	568
	20.1667	253	254	250	287	292	299	332	341	313	381	384	389	485	475	484	530	525	566
	20.3333	251	257	249	283	293	299	329	338	313	388	387	389	487	480	488	532	523	572
	20.5	252	255	250	283	289	298	329	340	311	383	385	389	484	475	486	532	522	569
	20.6667	254	256	250	283	294	297	331	341	314	389	385	392	488	475	490	528	521	571
	20.8333	255	256	252	283	293	303	331	338	312	386	387	393	482	478	485	525	525	570
	21	252	253	249	283	291	295	326	339	313	389	386	391	483	477	497	530	527	568
	21.1667	249	259	249	286	293	298	329	338	313	387	381	389	481	471	488	528	528	570
	21.3333	253	256	251	283	292	302	330	333	314	389	385	388	485	475	486	532	526	566
	21.5	255	263	251	286	294	301	329	340	314	386	383	392	485	473	491	527	531	566
	21.6667	257	260	253	282	293	300	330	340	313	388	385	393	481	470	488	533	529	569
	21.8333	255	261	250	287	294	303	335	341	313	388	387	395	483	472	488	532	527	571
	22	255	265	250	285	293	303	334	339	313	385	385	392	486	477	486	529	527	568
	22.1667	253	259	252	284	296	299	327	340	311	389	387	392	482	477	489	525	526	568
	22.3333	254	261	251	282	296	301	333	338	314	387	386	397	480	478	492	528	528	567
	22.5	254	262	257	286	294	303	335	337	316	386	390	390	484	475	489	530	531	569
	22.6667	258	263	259	287	292	304	338	341	314	392	386	396	480	478	491	529	530	571
	22.8333	255	267	257	283	292	300	334	339	313	390	382	393	486	476	485	528	528	572
	23	259	266	259	283	298	302	335	341	316	390	387	393	485	476	491	530	526	571
	23.1667	262	267	252	284	293	301	338	346	313	390	387	393	483	472	489	531	528	569
	23.3333	260	271	256	283	295	300	334	343	312	390	388	396	477	473	485	525	523	567
	23.5	259	272	255	287	294	304	339	342	313	393	383	395	485	474	488	529	533	565
	23.6667	256	270	261	285	295	306	333	342	315	386	387	390	485	476	491	525	530	572
	23.8333	258	268	259	285	296	303	334	345	313	391	392	392	482	474	484	530	531	563
	24	257	269	260	282	296	304	336	342	313	389	386	392	484	473	486	535	528	569
	24.1667	261	275	263	285	297	305	336	339	316	388	387	392	485	474	487	534	529	566
	24.3333	259	271	264	288	300	305	331	342	313	393	387	396	486	477	487	533	530	569
	24.5	261	272	260	284	296	305	335	341	315	388	385	393	485	470	490	532	529	567
	24.6667	260	276	261	289	293	310	333	342	317	388	387	393	482	476	490	534	530	565
	24.8333	263	272	262	287	293	308	338	344	313	388	390	397	481	479	487	525	531	570
	25	261	273	265	289	297	306	338	341	319	394	389	393	481	475	487	530	532	570
	25.1667	261	276	260	288	298	311	339	344	314	386	387	392	478	471	488	525	526	567
	25.3333	266	277	265	284	292	309	340	344	316	393	388	396	489	479	486	530	530	570
	25.5	265	276	262	285	297	306	341	341	317	391	384	394	485	473	491	531	531	569
	25.6667	265	278	266	290	297	311	334	344	317	389	383	392	488	470	489	533	531	572
	25.8333	266	279	265	288	294	307	340	349	317	395	386	393	485	472	490	534	533	568
	26	262	280	266	288	293	305	336	341	315	396	387	399	481	474	488	527	530	568
	26.1667	264	281	265	288	294	307	335	346	317	393	388	395	485	473	498	527	533	563
	26.3333	259	284	268	289	296	307	337	344	314	392	388	398	481	476	489	531	532	568
	26.5	262	278	267	288	295	306	340	347	316	391	387	393	482	475	490	527	533	565
	26.6667	263	282	272	290	297	305	334	343	317	388	393	397	477	475	492	531	529	569
	26.8333	260	284	270	291	296	309	334	342	317	392	387	392	483	478	493	532	528	569
	27	268	280	268	292	299	309	335	348	318	392	390	397	487	475	491	529	534	566
	27.1667	262	287	271	291	297	310	340	341	321	391	390	395	482	471	489	531	531	570
	27.3333	264	284	269	291	295	307	336	341	317	391	390	402	487	473	489	526	532	563
	27.5	268	284	274	289	296	311	342	345	319	396	387	396	488	477	493	533	535	564
	27.6667	269	284	269	290	295	310	337	344	317	396	386	396	484	474	487	527	534	567
	27.8333	266	286	273	291	296	306	337	346	318	392	391	401	482	477	486	530	534	565
	28	264	285	271	288	296	312	340	342	322	392	391	398	486	474	487	533	532	565
	28.1667	270	285	277	290	298	310	341	341	317	391	392	394	487	474	488	528	535	570
	28.3333	273	287	277	289	295	312	343	344	319	392	394	400	487	473	494	530	530	567
	28.5	269	287	272	291	297	311	341	345	316	394	388	389	487	476	491	532	536	567
	28.6667	274	291	276	290	295	307	342	346	320	394	390	396	482	474	489	534	538	566
	28.8333	269	291	273	292	301	309	342	342	320	398	394	399	485	472	493	531	536	562
	29	272	293	275	289	298	310	340	345	318	397	390	397	483	468	491	539	540	568
	29.1667	272	292	275	289	297	309	342	345	319	393	389	397	482	474	489	527	537	566
	29.3333	272	290	278	293	298	310	337	344	319	397	389	401	481	474	491	525	529	573
	29.5	271	292	279	292	300	312	338	344	320	396	385	404	483	474	492	529	535	567
	29.6667	269	293	277	292	299	315	340	348	322	395	392	396	481	475	488	533	536	565
	29.8333	274	293	282	293	302	309	341	347	321	391	387	401	485	472	490	531	541	569
	30	274	294	277	295	298	313	343	348	320	396	390	399	482	476	484	529	536	571
	30.1667	270	294	277	288	297	311	346	344	325	396	384	393	484	473	487	534	532	568
	30.3333	272	297	279	290	300	313	345	350	319	394	390	399	484	474	491	533	539	573
	30.5	273	296	280	294	301	315	342	345	322	392	389	394	481	473	490	537	537	570
	30.6667	276	291	277	291	301	316	340	344	323	392	390	398	481	471	488	533	538	564
	30.8333	275	298	282	291	303	313	345	345	322	397	395	396	483	469	488	530	533	567
	31	276	296	283	294	298	313	338	348	321	399	395	401	486	471	488	533	536	568
	31.1667	272	297	287	298	298	315	345	348	325	399	392	395	483	479	491	527	542	562
	31.3333	278	297	280	296	303	313	345	349	324	398	386	395	485	470	493	540	532	568
	31.5	273	300	283	292	303	314	344	347	325	401	393	405	482	471	485	531	533	569
	31.6667	276	299	284	293	296	311	338	343	324	401	392	399	488	475	490	534	535	564
	31.8333	276	303	284	294	300	314	346	345	325	398	390	400	488	478	491	538	532	570
	32	278	299	283	293	300	316	345	349	325	397	393	400	481	476	491	534	542	566
	32.1667	278	297	288	294	301	313	342	347	321	400	392	396	480	471	487	538	537	567
	32.3333	271	303	283	295	302	315	343	347	323	399	387	395	482	470	487	536	541	571
	32.5	277	299	287	295	301	314	344	345	322	401	389	399	483	476	493	532	540	569
	32.6667	275	301	288	295	302	312	344	347	322	399	392	402	479	469	492	533	537	568
	32.8333	276	303	291	292	296	314	350	350	324	398	391	397	482	473	493	531	535	567
	33	274	305	287	292	303	314	344	350	324	400	395	404	480	472	492	533	539	566
	33.1667	282	302	287	297	303	316	343	345	325	399	393	404	482	474	491	537	541	569
	33.3333	278	306	291	297	302	319	341	347	320	396	393	404	481	472	490	534	538	571
	33.5	281	305	288	295	301	311	345	348	325	396	392	399	482	463	490	529	537	571
	33.6667	274	304	288	293	301	316	340	350	322	398	390	401	478	471	492	536	540	569
	33.8333	282	313	291	297	300	314	351	350	324	403	392	401	485	473	484	534	540	561
	34	278	308	291	294	300	319	347	350	324	402	392	399	475	474	494	535	544	566
	34.1667	279	308	293	301	302	317	349	349	323	399	393	398	484	476	492	540	543	568
	34.3333	280	306	294	295	303	319	347	348	325	394	394	405	478	472	489	533	543	571
	34.5	284	309	294	296	300	318	345	350	325	400	393	401	480	474	485	539	544	567
	34.6667	283	313	298	297	298	316	352	353	326	393	396	401	489	474	491	535	541	571
	34.8333	281	310	295	298	306	321	345	346	326	406	396	407	477	473	495	535	540	567
	35	284	308	293	295	306	315	349	347	328	401	396	403	483	469	491	539	546	567
	35.1667	284	314	297	300	302	316	345	348	325	400	387	401	481	472	487	536	540	568
	35.3333	284	312	295	297	300	313	346	351	325	398	395	397	480	472	489	535	541	567
	35.5	282	317	291	295	305	318	348	352	327	400	398	406	482	471	490	537	542	568
