# Supplementary material for: Cross-talk between individual phenol-soluble modulins in Staphylococcus aureus biofilm enables rapid and efficient amyloid formation
Source: eLife. 2020 Dec 1;9:e59776. doi: 10.7554/eLife.59776 (PMC7732344; doi:10.7554/eLife.59776)
Supplement: Figure 1—figure supplement 4—source data 1. [file elife-59776-fig1-figsupp4-data1.xlsx]

## Sheet: Sup. Fig. 3a
PSMα1 monomer conccentration= 0.25 mg/ml
Seeds= 20%, 30%, 40%, 50% to that of monomeric concentartion
		0.2	0.2	0.2	0.3	0.3	0.3	0.4	0.4	0.4	0.5	0.5	0.5
	Time (h)	0.13 mM	0.13 mM	0.13 mM	0.14 mM	0.14 mM	0.14 mM	0.15 mM	0.15 mM	0.15 mM	0.16 mM	0.16 mM	0.16 mM
	0	1717	2001	1689	2206	2404	2571	2872	2604	2546	3765	3261	3948
	0.166667	1866	2117	1819	2412	2622	2748	3129	2963	2786	4400	3686	4641
	0.333333	2019	2328	2088	2548	2781	2939	3462	3130	3124	4859	4054	5072
	0.5	2213	2473	2207	2787	3003	3103	3723	3444	3471	5497	4408	5853
	0.666667	2334	2597	2427	2984	3215	3335	4053	3893	3829	6097	4699	6326
	0.833333	2515	2792	2542	3253	3445	3505	4421	4019	4166	6438	5039	6797
	1	2636	2973	2652	3513	3604	3704	4650	4410	4469	6844	5431	7281
	1.16667	2770	3179	2781	3836	3869	3969	4901	4687	4685	7341	5867	7697
	1.33333	2889	3348	2904	4012	4012	4192	5326	4939	4982	7739	6416	8026
	1.5	3020	3521	3033	4352	4350	4450	5821	5457	5304	8054	6959	8410
	1.66667	3141	3685	3257	4648	4564	4664	6147	5656	5602	8532	7583	8845
	1.83333	3282	3838	3360	4841	4789	4889	6336	6030	5985	9066	8036	9154
	2	3395	3977	3550	4918	4978	4978	6733	6235	6270	9529	8537	9650
	2.16667	3434	3996	3580	4976	4994	4994	7331	6786	6813	10858	9317	10537
	2.33333	3543	4128	3607	5016	5071	5071	7552	7135	7131	11124	9705	11180
	2.5	3651	4251	3689	5128	5247	5247	7870	7620	7323	11936	10005	11470
	2.66667	3763	4338	3786	5255	5397	5397	8239	7859	7539	12519	10225	11850
	2.83333	3870	4451	3890	5379	5503	5503	8362	8046	7621	12684	10546	12089
	3	3968	4563	3995	5433	5648	5648	8588	8217	7815	12903	10754	12307
	3.16667	4064	4655	4101	5542	5758	5758	8416	8231	7802	12870	10936	12551
	3.33333	4147	4734	4242	5581	5875	5875	8593	8244	7842	13039	11072	12803
	3.5	4212	4804	4318	5681	5945	5895	8678	8329	7878	13119	11282	13060
	3.66667	4308	4833	4397	5732	5952	5921	8857	8360	7904	13189	11414	13104
	3.83333	4358	4868	4449	5806	5955	5948	8950	8378	7940	13246	11478	13130
	4	4432	4925	4552	5828	5972	5968	9079	8386	7961	13229	11551	13165
	4.16667	4481	4953	4658	5865	5979	6005	9145	8417	7992	13282	11583	13220
	4.33333	4508	4965	4735	5896	5990	6044	9196	8512	8014	13285	11577	13225
	4.5	4579	5010	4806	5960	6014	6093	9265	8572	8066	13297	11663	13259
	4.66667	4609	5029	4821	5958	6037	6073	9316	8586	8095	13356	11674	13291
	4.83333	4655	5011	4867	6005	6018	6100	9355	8583	8130	13323	11715	13316
	5	4688	5039	4869	6039	6014	6122	9390	8567	8163	13334	11813	13343
	5.16667	4718	5041	4894	6064	6075	6121	9415	8610	8199	13320	11854	13115
	5.33333	4750	5017	4903	6087	6071	6115	9448	8615	8138	13412	11877	13107
	5.5	4758	5043	4941	6090	6079	6138	9473	8626	8156	13392	11987	13099
	5.66667	4778	5062	4958	6123	6114	6148	9481	8622	8196	13391	11989	13131
	5.83333	4815	5066	4994	6153	6096	6155	9495	8636	8108	13415	11965	13123
	6	4814	5055	5031	6150	6095	6135	9497	8647	8141	13439	12000	13159
	6.16667	4828	5073	5047	6167	6127	6162	9505	8636	8179	13402	12003	13218
	6.33333	4827	5050	5051	6172	6128	6158	9546	8659	8195	13517	12024	13234
	6.5	4852	5088	5071	6208	6175	6157	9555	8682	8111	13493	12086	13190
	6.66667	4862	5083	5091	6219	6145	6163	9624	8678	8130	13508	12183	13238
	6.83333	4867	5107	5109	6242	6168	6183	9690	8697	8152	13516	12179	13259
	7	4886	5104	5124	6262	6170	6199	9702	8715	8176	13502	12166	13249
	7.16667	4894	5100	5137	6271	6186	6171	9746	8682	8186	13506	12253	13264
	7.33333	4893	5106	5138	6255	6180	6191	9700	8727	8194	13552	12274	13287
	7.5	4906	5114	5133	6292	6186	6210	9693	8755	8193	13549	12237	13304
	7.66667	4882	5102	5132	6291	6196	6198	9727	8714	8197	13573	12288	13275
	7.83333	4899	5107	5146	6312	6212	6197	9726	8764	8189	13566	12345	13280
	8	4909	5109	5151	6313	6206	6203	9721	8753	8215	13617	12316	13229
	8.16667	4916	5104	5139	6312	6214	6206	9773	8784	8189	13603	12359	13250
	8.33333	4930	5100	5181	6340	6247	6188	9748	8807	8257	13595	12283	13263
	8.5	4915	5106	5145	6333	6257	6221	9749	8830	8254	13616	12306	13276
	8.66667	4918	5114	5162	6348	6236	6224	9722	8858	8227	13641	12358	13284
	8.83333	4894	5102	5177	6346	6262	6251	9767	8825	8278	13637	12363	13343
	9	4923	5107	5177	6368	6256	6249	9766	8823	8284	13683	12434	13295
	9.16667	4915	5109	5186	6381	6268	6239	9719	8899	8309	13658	12475	13283
	9.33333	4929	5125	5182	6394	6283	6280	9826	8888	8317	13747	12509	13294
	9.5	4910	5111	5179	6391	6299	6231	9757	8872	8371	13688	12468	13309
	9.66667	4933	5137	5170	6429	6302	6248	9758	8890	8397	13719	12486	13314
	9.83333	4941	5138	5177	6422	6293	6241	9789	8896	8374	13699	12532	13358
	10	4923	5133	5184	6428	6304	6241	9787	8940	8415	13757	12518	13313
	10.1667	4932	5132	5191	6424	6313	6263	9842	8925	8429	13741	12605	13306
	10.3333	4930	5146	5196	6422	6311	6264	9868	8923	8459	13747	12608	13388
	10.5	4919	5151	5206	6439	6304	6284	9805	8965	8446	13739	12641	13352
	10.6667	4932	5139	5205	6480	6338	6291	9825	9028	8486	13758	12696	13370
	10.8333	4921	5181	5210	6496	6333	6280	9847	9012	8485	13827	12790	13368
	11	4927	5145	5220	6488	6317	6284	9812	8996	8528	13826	12751	13331
	11.1667	4932	5162	5213	6484	6338	6287	9810	9060	8511	13810	12805	13334
	11.3333	4931	5177	5214	6481	6352	6301	9841	9038	8551	13837	12793	13300
	11.5	4924	5177	5236	6516	6352	6298	9859	9030	8562	13817	12877	13384
	11.6667	4923	5186	5221	6524	6360	6318	9866	9014	8563	13838	12882	13358
	11.8333	4944	5182	5202	6505	6366	6310	9825	9018	8553	13815	12871	13306
	12	4928	5179	5214	6513	6370	6316	9831	9100	8623	13805	12864	13396
	12.1667	4934	5170	5219	6514	6382	6313	9848	9050	8663	13836	12899	13354
	12.3333	4934	5177	5230	6539	6394	6306	9814	9070	8632	13902	12896	13376
	12.5	4958	5184	5225	6506	6390	6331	9890	9096	8669	13874	12907	13411
	12.6667	4928	5191	5215	6571	6383	6301	9859	9072	8636	13833	12906	13404
	12.8333	4939	5196	5242	6536	6392	6312	9902	9106	8676	13943	12930	13394
	13	4942	5206	5257	6583	6393	6320	9882	9130	8644	13940	12874	13388
	13.1667	4937	5205	5250	6545	6391	6326	9873	9152	8676	13955	12913	13363
	13.3333	4928	5210	5237	6593	6409	6330	9907	9139	8667	13947	12937	13458
	13.5	4937	5220	5259	6540	6404	6332	9895	9119	8700	13938	12930	13475
	13.6667	4952	5213	5264	6613	6417	6340	9856	9164	8679	13974	12940	13404
	13.8333	4939	5214	5249	6596	6431	6339	9892	9161	8725	13968	12918	13434
	14	4928	5236	5262	6598	6419	6358	9859	9161	8745	13927	12962	13458
	14.1667	4932	5221	5256	6619	6452	6354	9900	9169	8750	13984	12966	13461
	14.3333	4961	5202	5276	6622	6433	6353	9877	9195	8749	13999	12969	13432
	14.5	4962	5214	5270	6614	6436	6350	9904	9187	8748	14015	12987	13434
	14.6667	4939	5219	5251	6639	6427	6355	9950	9232	8789	14031	12951	13525
	14.8333	4965	5230	5264	6631	6456	6378	9949	9195	8788	14019	12951	13455
	15	4966	5225	5256	6659	6436	6368	9941	9240	8789	14032	12977	13433
	15.1667	4966	5215	5306	6647	6457	6357	9993	9237	8824	14017	12991	13447
	15.3333	4954	5242	5272	6655	6462	6376	9924	9234	8830	14047	12993	13429
	15.5	4944	5257	5292	6652	6481	6368	9944	9254	8855	14059	13014	13496
	15.6667	4969	5250	5286	6666	6462	6365	9943	9242	8837	14106	12956	13444
	15.8333	4942	5237	5285	6685	6491	6381	9982	9273	8859	14074	12994	13486
	16	4955	5259	5295	6671	6474	6380	9992	9282	8860	14131	13009	13462
	16.1667	4986	5264	5297	6666	6466	6375	9991	9269	8867	14106	13052	13512
	16.3333	4982	5249	5290	6683	6489	6375	9976	9310	8900	14133	13052	13524
	16.5	4962	5262	5283	6678	6491	6394	9988	9323	8857	14046	12997	13552
	16.6667	4966	5256	5255	6707	6498	6379	9988	9291	8889	14106	13055	13463
	16.8333	4968	5276	5282	6679	6486	6376	9977	9317	8940	14160	13004	13493
	17	4978	5270	5273	6695	6512	6376	10002	9313	8912	14131	13054	13560
	17.1667	4986	5251	5292	6732	6520	6397	10006	9313	8916	14157	13040	13549
	17.3333	4974	5264	5281	6729	6517	6392	9998	9337	8910	14117	13039	13548
	17.5	4963	5256	5266	6705	6538	6418	9968	9383	8976	14156	13015	13525
	17.6667	4983	5306	5265	6718	6533	6402	9993	9377	8921	14210	13076	13579
	17.8333	4961	5272	5278	6711	6523	6405	10014	9337	8972	14150	13074	13583
	18	4987	5292	5291	6735	6543	6380	10031	9314	8935	14177	13026	13554
	18.1667	4964	5286	5265	6721	6559	6412	10001	9353	8989	14213	13068	13614
	18.3333	4964	5285	5298	6717	6554	6415	10036	9377	8959	14166	13094	13559
	18.5	4966	5295	5287	6763	6566	6414	9976	9386	8995	14210	13065	13614
	18.6667	4990	5297	5286	6753	6540	6418	10019	9373	9013	14177	13102	13571
	18.8333	4985	5290	5279	6738	6564	6418	10034	9387	8999	14190	13094	13580
	19	4964	5283	5301	6735	6556	6412	10037	9423	9027	14231	13125	13534
	19.1667	4968	5255	5299	6776	6567	6432	10046	9429	8999	14236	13059	13511
	19.3333	4976	5282	5306	6747	6558	6417	10060	9391	9041	14278	13124	13524
	19.5	4965	5273	5310	6766	6558	6428	10031	9434	9069	14233	13112	13483
	19.6667	4980	5292	5303	6747	6586	6435	10084	9454	9065	14218	13101	13492
	19.8333	4967	5281	5301	6771	6566	6429	10097	9372	9044	14256	13061	13461
	20	5001	5266	5299	6763	6572	6427	10033	9406	9043	14313	13124	13519
	20.1667	4984	5265	5320	6757	6602	6420	10048	9431	9024	14211	13070	13472
	20.3333	4978	5278	5302	6777	6570	6413	10086	9432	9077	14267	13103	13480
	20.5	4966	5291	5310	6781	6599	6395	10058	9447	9112	14320	13077	13460
	20.6667	4971	5265	5310	6790	6593	6386	10101	9420	9092	14221	13137	13487
	20.8333	4998	5298	5311	6782	6587	6391	10093	9452	9081	14283	13132	13476
	21	4996	5287	5302	6793	6607	6401	10099	9437	9070	14297	13142	13484
	21.1667	5008	5286	5324	6813	6619	6399	10131	9457	9076	14280	13135	13487
	21.3333	4989	5279	5338	6800	6586	6385	10069	9472	9110	14285	13139	13528
	21.5	4985	5301	5325	6797	6598	6395	10107	9485	9112	14278	13123	13459
	21.6667	4989	5299	5332	6815	6607	6387	10069	9440	9108	14301	13143	13479
	21.8333	4983	5306	5341	6826	6605	6408	10092	9496	9163	14302	13156	13491
	22	5004	5310	5356	6790	6585	6417	10086	9486	9154	14293	13148	13510
	22.1667	5003	5303	5331	6825	6613	6421	10105	9478	9133	14312	13145	13481
	22.3333	4998	5301	5345	6815	6616	6414	10129	9492	9189	14331	13160	13440
	22.5	5002	5299	5333	6823	6628	6394	10126	9517	9163	14352	13147	13473
	22.6667	5002	5320	5349	6835	6643	6425	10107	9530	9152	14301	13166	13424
	22.8333	5005	5302	5360	6853	6640	6395	10162	9566	9165	14341	13148	13432
	23	5015	5310	5364	6822	6656	6420	10172	9506	9156	14352	13134	13391
	23.1667	4981	5310	5341	6842	6666	6417	10206	9488	9164	14362	13199	13401
	23.3333	5005	5311	5352	6801	6627	6420	10128	9516	9158	14335	13170	13445
	23.5	5017	5302	5354	6847	6638	6418	10174	9528	9198	14336	13205	13388
	23.6667	5014	5324	5363	6824	6632	6424	10161	9538	9125	14346	13194	13323
	23.8333	5006	5338	5362	6856	6641	6448	10152	9584	9223	14362	13176	13344
	24	5000	5325	5362	6847	6639	6435	10194	9594	9241	14353	13192	13349
	24.1667	5024	5332	5361	6840	6650	6437	10209	9579	9230	14385	13205	13371
	24.3333	5024	5341	5341	6882	6661	6432	10205	9593	9235	14381	13175	13312
	24.5	5009	5356	5392	6873	6665	6438	10232	9586	9182	14399	13188	13342
	24.6667	5026	5331	5379	6895	6688	6447	10237	9562	9225	14383	13210	13381
	24.8333	5021	5345	5371	6871	6670	6470	10252	9619	9199	14401	13177	13377
	25	5014	5333	5372	6879	6667	6448	10212	9584	9267	14404	13192	13363
	25.1667	5012	5349	5378	6857	6678	6451	10229	9546	9238	14410	13207	13301
	25.3333	5014	5360	5383	6886	6684	6440	10234	9580	9224	14442	13230	13340
	25.5	5033	5364	5365	6914	6663	6457	10189	9591	9256	14423	13216	13324
	25.6667	5039	5341	5383	6882	6691	6453	10232	9588	9231	14386	13204	13288
	25.8333	5030	5352	5395	6873	6673	6457	10246	9648	9233	14462	13253	13307
	26	5013	5354	5391	6894	6678	6479	10257	9597	9244	14425	13224	13249
	26.1667	5043	5363	5372	6881	6677	6433	10225	9642	9282	14428	13229	13207
	26.3333	5026	5362	5392	6900	6682	6446	10238	9615	9271	14427	13243	13184
	26.5	5017	5362	5370	6889	6718	6486	10249	9637	9297	14407	13234	13220
	26.6667	5037	5361	5389	6909	6692	6471	10288	9649	9273	14447	13280	13171
	26.8333	5026	5341	5381	6923	6691	6455	10231	9635	9320	14423	13258	13117
	27	5050	5392	5370	6903	6711	6471	10233	9622	9325	14377	13263	13095
	27.1667	5030	5379	5402	6906	6683	6473	10240	9604	9272	14352	13260	13124
	27.3333	5016	5371	5378	6916	6702	6471	10238	9611	9275	14390	13303	13108
	27.5	5023	5372	5401	6891	6690	6457	10256	9662	9280	14448	13292	13062
	27.6667	5015	5378	5383	6895	6704	6469	10244	9594	9305	14409	13274	13060
	27.8333	5041	5383	5391	6896	6704	6475	10244	9620	9299	14381	13298	13040
	28	5038	5365	5383	6900	6722	6491	10254	9624	9282	14397	13302	13062
	28.1667	5023	5383	5385	6912	6716	6492	10288	9636	9351	14342	13259	13023
	28.3333	5033	5395	5392	6932	6713	6490	10246	9634	9332	14451	13296	13066
	28.5	5030	5391	5414	6923	6719	6488	10279	9644	9261	14420	13301	13007
	28.6667	5020	5372	5410	6910	6713	6507	10278	9627	9312	14333	13293	13004
	28.8333	5042	5392	5406	6924	6707	6490	10268	9629	9304	14422	13288	12749
	29	4988	5370	5400	6908	6705	6487	10292	9656	9307	14360	13289	12730
	29.1667	5029	5389	5392	6910	6701	6489	10250	9628	9280	14348	13332	12686
	29.3333	5036	5381	5418	6923	6744	6479	10270	9620	9338	14382	13312	12768
	29.5	5037	5370	5396	6932	6742	6472	10286	9691	9314	14410	13299	12748
	29.6667	5036	5402	5419	6906	6738	6508	10258	9651	9294	14384	13330	12706
	29.8333	5031	5378	5416	6926	6731	6492	10290	9676	9373	14396	13282	12770
	30	5042	5401	5438	6928	6736	6499	10277	9681	9336	14326	13216	12745
	30.1667	5025	5383	5408	6937	6697	6496	10313	9679	9342	14329	13258	12723
	30.3333	5023	5391	5420	6922	6682	6506	10297	9656	9334	14342	13210	12731
	30.5	5024	5383	5412	6941	6696	6466	10310	9686	9347	14414	13201	12765
	30.6667	5046	5385	5415	6949	6694	6502	10270	9689	9346	14389	13192	12790
	30.8333	5029	5392	5433	6899	6696	6473	10336	9671	9310	14389	13233	12741
	31	5034	5414	5414	6911	6699	6507	10287	9658	9321	14319	13182	12719
	31.1667	5041	5410	5405	6925	6703	6503	10336	9688	9334	14381	13225	12771
	31.3333	5036	5406	5416	6929	6695	6493	10275	9667	9361	14331	13228	12794
	31.5	5028	5400	5440	6919	6700	6507	10330	9676	9389	14338	13253	12739
	31.6667	5047	5392	5424	6924	6700	6490	10360	9673	9381	14322	13250	12753
	31.8333	5056	5418	5434	6906	6705	6503	10325	9682	9331	14325	13216	12771
	32	5026	5396	5428	6950	6709	6504	10354	9694	9365	14396	13227	12803
	32.1667	5053	5419	5422	6926	6713	6517	10341	9714	9401	14378	13259	12776
	32.3333	5049	5416	5426	6947	6704	6529	10328	9673	9387	14303	13246	12756
	32.5	5030	5438	5433	6979	6695	6530	10403	9726	9379	14337	13228	12770
	32.6667	5040	5408	5409	6937	6721	6498	10384	9729	9418	14392	13309	12792
	32.8333	5040	5420	5430	6949	6703	6497	10413	9722	9388	14371	13242	12785
	33	5043	5412	5431	6982	6723	6486	10381	9750	9420	14351	13262	12847
	33.1667	5053	5415	5445	6961	6694	6529	10388	9788	9440	14345	13291	12800
	33.3333	5046	5433	5435	6931	6708	6522	10359	9767	9423	14351	13305	12782
	33.5	5052	5414	5433	6943	6714	6529	10356	9763	9419	14303	13277	12862
	33.6667	5057	5405	5433	6956	6726	6515	10376	9750	9460	14294	13273	12829
	33.8333	5064	5416	5440	6987	6745	6517	10357	9739	9465	14286	13276	12794
	34	5041	5440	5435	6932	6749	6524	10388	9769	9453	14321	13240	12876
	34.1667	5056	5424	5446	6940	6752	6535	10373	9762	9445	14344	13292	12855
	34.3333	5051	5434	5448	6969	6744	6516	10388	9776	9408	14354	13283	12902
	34.5	5037	5428	5463	6988	6737	6520	10384	9777	9460	14307	13296	12823
	34.6667	5038	5422	5446	6984	6747	6546	10389	9759	9421	14300	13322	12804
	34.8333	5047	5426	5441	6962	6746	6547	10405	9759	9490	14378	13286	12852
	35	5044	5433	5446	6974	6735	6512	10365	9742	9454	14361	13303	12812
	35.1667	5061	5409	5464	6971	6759	6530	10399	9752	9503	14370	13315	12893
	35.3333	5072	5430	5445	6955	6762	6532	10448	9790	9457	14367	13302	12897
	35.5	5039	5431	5440	6966	6758	6545	10405	9836	9462	14295	13308	12862
	35.6667	5059	5445	5431	6987	6759	6535	10406	9764	9446	14383	13279	12897
	35.8333	5047	5435	5445	6974	6772	6518	10400	9775	9485	14283	13278	12922
	36	5062	5433	5454	7014	6776	6509	10438	9807	9518	14355	13248	12905
	36.1667	5076	5433	5461	7001	6779	6545	10460	9834	9516	14357	13284	12906
	36.3333	5047	5440	5452	6996	6734	6524	10433	9811	9523	14304	13274	12865
	36.5	5084	5435	5455	7024	6788	6530	10478	9837	9530	14307	13282	12910
	36.6667	5083	5446	5449	7006	6779	6534	10478	9813	9494	14319	13329	12874
	36.8333	5051	5448	5445	6951	6793	6534	10460	9816	9514	14370	13292	12904
	37	5043	5463	5466	6992	6765	6535	10419	9793	9481	14315	13335	12853
	37.1667	5063	5446	5468	7005	6776	6519	10436	9767	9503	14338	13325	12905
	37.3333	5043	5441	5458	6992	6782	6517	10446	9832	9551	14374	13328	12861
	37.5	5076	5446	5471	7022	6770	6527	10495	9825	9577	14320	13347	12951
	37.6667	5052	5464	5453	7012	6759	6518	10450	9850	9556	14327	13334	12871
	37.8333	5063	5445	5472	6984	6782	6543	10491	9829	9571	14348	13336	12906
	38	5059	5440	5466	7006	6775	6547	10466	9840	9541	14369	13372	12906
	38.1667	5087	5431	5473	7038	6785	6539	10524	9842	9575	14323	13290	12949
	38.3333	5059	5445	5485	7019	6784	6518	10491	9825	9594	14335	13332	12895
	38.5	5064	5454	5468	7006	6784	6553	10471	9849	9555	14360	13302	12961
	38.6667	5033	5461	5460	7006	6816	6532	10437	9761	9504	14375	13370	12862
	38.8333	5051	5452	5485	6998	6812	6529	10433	9783	9445	14357	13339	12872
	39	5043	5455	5474	6994	6789	6536	10483	9741	9442	14360	13370	12824
	39.1667	5035	5449	5488	6976	6778	6535	10420	9748	9435	14369	13352	12826
	39.3333	5053	5445	5509	6984	6792	6534	10430	9744	9484	14351	13327	12816
	39.5	5038	5466	5497	6986	6802	6553	10434	9714	9436	14385	13394	12800
	39.6667	5038	5468	5478	7001	6810	6552	10397	9718	9455	14342	13334	12827
	39.8333	5043	5458	5493	6976	6807	6564	10399	9731	9443	14338	13352	12818
	40	5024	5471	5485	6971	6816	6554	10441	9730	9436	14359	13376	12801
	40.1667	5031	5453	5487	6997	6834	6562	10461	9700	9441	14380	13357	12760
	40.3333	5042	5472	5495	6978	6801	6552	10416	9687	9471	14308	13352	12755
	40.5	5048	5466	5488	7012	6820	6564	10401	9720	9484	14368	13419	12818
	40.6667	5043	5473	5507	6989	6801	6549	10430	9740	9461	14331	13386	12756
	40.8333	5049	5485	5518	7006	6799	6562	10429	9759	9485	14374	13396	12787
	41	5046	5468	5506	7012	6832	6571	10463	9746	9477	14319	13410	12810
	41.1667	5058	5460	5502	7001	6797	6564	10473	9760	9458	14318	13374	12847
	41.3333	5057	5485	5509	7015	6809	6574	10472	9735	9479	14356	13405	12817
	41.5	5045	5474	5503	7007	6797	6542	10486	9734	9473	14347	13374	12822
	41.6667	5042	5488	5507	7037	6799	6579	10479	9781	9449	14334	13426	12829
	41.8333	5045	5509	5518	7042	6819	6564	10483	9758	9466	14376	13357	12798
	42	5067	5497	5516	7012	6794	6577	10481	9760	9464	14390	13422	12827
	42.1667	5039	5478	5503	7011	6818	6580	10492	9759	9477	14367	13373	12828
	42.3333	5045	5493	5509	6991	6817	6575	10471	9778	9477	14365	13416	12800
	42.5	5041	5485	5498	7027	6829	6583	10465	9748	9483	14320	13360	12825
	42.6667	5060	5487	5508	7026	6811	6578	10472	9776	9507	14356	13395	12868
	42.8333	5061	5495	5503	7031	6829	6603	10494	9781	9511	14355	13373	12864
	43	5052	5488	5508	7059	6818	6575	10511	9789	9512	14345	13402	12818
	43.1667	5041	5507	5502	7033	6834	6602	10515	9800	9482	14360	13417	12841
	43.3333	5063	5518	5531	7021	6825	6603	10484	9832	9504	14326	13393	12867
	43.5	5045	5506	5508	7021	6825	6577	10465	9767	9506	14341	13405	12857
	43.6667	5068	5502	5514	7000	6832	6573	10538	9782	9464	14327	13439	12851
	43.8333	5033	5509	5493	7018	6822	6596	10527	9795	9532	14365	13411	12832
	44	5046	5503	5508	7006	6834	6590	10503	9774	9490	14325	13403	12862
	44.1667	5061	5507	5512	7041	6844	6596	10494	9802	9463	14389	13343	12804
	44.3333	5060	5518	5514	7026	6815	6589	10532	9776	9524	14324	13430	12825
	44.5	5040	5516	5513	7024	6849	6589	10530	9781	9524	14339	13415	12843
	44.6667	5078	5503	5512	7031	6833	6607	10522	9783	9543	14343	13392	12833
	44.8333	5067	5509	5522	7026	6823	6592	10537	9786	9517	14356	13409	12877
	45	5041	5498	5519	7035	6833	6617	10524	9790	9544	14380	13379	12852
	45.1667	5062	5508	5503	7031	6840	6586	10524	9778	9538	14384	13388	12864
	45.3333	5069	5503	5502	7032	6818	6591	10522	9845	9516	14394	13385	12923
	45.5	5043	5508	5516	6993	6860	6599	10556	9806	9512	14380	13392	12883
	45.6667	5052	5502	5524	7044	6834	6605	10557	9816	9530	14415	13407	12829
	45.8333	5066	5531	5526	7014	6856	6600	10529	9762	9554	14404	13409	12861
	46	5059	5508	5511	7028	6845	6599	10525	9818	9544	14451	13418	12853
	46.1667	5086	5514	5518	7023	6833	6582	10553	9833	9542	14410	13394	12869
	46.3333	5077	5493	5526	7033	6863	6605	10515	9816	9543	14405	13436	12859
	46.5	5060	5508	5531	7044	6835	6626	10574	9823	9518	14396	13400	12863
	46.6667	5058	5512	5506	7056	6858	6600	10563	9845	9574	14415	13430	12915
	46.8333	5074	5514	5517	7087	6869	6605	10586	9860	9608	14412	13430	12873
	47	5085	5513	5533	7081	6834	6619	10610	9892	9577	14441	13397	12905
	47.1667	5067	5512	5524	7052	6860	6615	10549	9854	9557	14427	13420	12883
	47.3333	5066	5522	5517	7052	6857	6619	10565	9839	9551	14424	13421	12924
	47.5	5082	5519	5504	7043	6828	6610	10561	9837	9582	14430	13423	12924
	47.6667	5090	5503	5519	7057	6847	6585	10572	9878	9601	14427	13360	12911
	47.8333	5062	5502	5516	7075	6857	6612	10578	9832	9607	14432	13417	12922
	48	5095	5516	5517	7048	6850	6605	10578	9824	9569	14426	13463	12930
	48.1667	5052	5524	5503	7056	6837	6608	10522	9879	9605	14426	13438	12914
	48.3333	5067	5526	5501	7077	6840	6608	10623	9855	9595	14426	13439	12952
	48.5	5071	5511	5499	7080	6861	6618	10554	9860	9601	14421	13434	12916
	48.6667	5056	5518	5519	7066	6858	6612	10578	9861	9566	14426	13448	12932
	48.8333	5068	5526	5521	7051	6848	6613	10572	9863	9585	14422	13438	12914
	49	5083	5531	5496	7097	6854	6608	10597	9860	9617	14425	13513	12930
	49.1667	5056	5506	5497	7073	6857	6628	10569	9906	9585	14423	13454	12932
	49.3333	5073	5517	5507	7058	6845	6607	10618	9887	9648	14423	13506	12924
	49.5	5063	5533	5513	7078	6860	6615	10626	9878	9605	14427	13468	12932
	49.6667	5065	5524	5528	7081	6870	6616	10606	9865	9617	14421	13456	12945
	49.8333	5077	5517	5505	7080	6853	6607	10617	9867	9624	14433	13462	12893
	50	5057	5504	5529	7068	6846	6604	10597	9840	9624	14439	13477	12919
	50.1667	5076	5519	5520	7060	6870	6608	10604	9847	9596	14434	13454	12929
	50.3333	5062	5516	5508	7027	6857	6615	10596	9882	9605	14428	13477	12981
	50.5	5078	5517	5509	7094	6875	6619	10630	9907	9610	14429	13467	12952
	50.6667	5071	5503	5515	7070	6870	6628	10616	9884	9684	14429	13497	12931
	50.8333	5071	5501	5511	7067	6870	6609	10580	9885	9644	14423	13473	12944
	51	5080	5499	5524	7069	6864	6615	10619	9879	9665	14421	13499	12996
	51.1667	5098	5519	5516	7085	6864	6608	10648	9906	9667	14424	13485	12993
	51.3333	5084	5521	5512	7066	6895	6623	10635	9921	9642	14426	13497	12965
	51.5	5092	5496	5517	7063	6866	6617	10611	9908	9676	14427	13499	12951
	51.6667	5084	5497	5520	7090	6904	6611	10628	9906	9630	14429	13502	12971
	51.8333	5076	5507	5519	7054	6881	6608	10671	9939	9622	14423	13484	12960
	52	5086	5513	5505	7069	6876	6621	10661	9915	9630	14429	13479	12939
	52.1667	5074	5528	5526	7070	6873	6608	10648	9915	9651	14425	13508	12952
	52.3333	5059	5505	5510	7069	6910	6621	10606	9908	9643	14422	13533	12965
	52.5	5073	5529	5510	7059	6893	6622	10663	9915	9676	14427	13483	12964
	52.6667	5059	5520	5511	7066	6899	6596	10656	9938	9659	14427	13537	12971
	52.8333	5067	5508	5511	7071	6881	6638	10624	9881	9635	14420	13496	12939
	53	5081	5509	5508	7039	6889	6628	10650	9930	9656	14428	13551	12927
	53.1667	5060	5515	5509	7080	6895	6600	10649	9931	9633	14425	13540	12935
	53.3333	5090	5511	5508	7062	6905	6619	10685	9926	9683	14420	13494	12929
	53.5	5085	5524	5516	7069	6902	6639	10682	9864	9656	14421	13545	12949
	53.6667	5084	5516	5522	7103	6869	6645	10728	9942	9675	14424	13567	12988
	53.8333	5084	5512	5515	7113	6888	6623	10702	9960	9661	14423	13596	12993
	54	5094	5517	5513	7111	6887	6635	10664	9944	9696	14429	13608	13039
	54.1667	5118	5520	5513	7085	6915	6615	10676	9931	9691	14434	13568	12949
	54.3333	5094	5519	5519	7106	6907	6591	10673	9955	9704	14428	13544	12994
	54.5	5109	5505	5539	7084	6903	6631	10712	9991	9691	14428	13585	12926
	54.6667	5097	5526	5515	7115	6921	6631	10731	9959	9698	14435	13572	13000
	54.8333	5079	5510	5527	7084	6901	6650	10690	9949	9619	14425	13566	12991
	55	5078	5510	5484	7062	6907	6621	10675	9979	9685	14433	13559	12984
	55.1667	5082	5511	5507	7071	6904	6627	10722	9982	9690	14435	13546	13014
	55.3333	5079	5511	5514	7082	6909	6633	10712	9993	9680	14431	13534	13007
	55.5	5094	5508	5521	7066	6907	6607	10726	9982	9667	14432	13493	13003
	55.6667	5087	5509	5527	7096	6910	6594	10710	9968	9711	14431	13543	12941
	55.8333	5101	5508	5505	7093	6907	6613	10700	9962	9697	14426	13531	13010
	56	5081	5516	5517	7063	6911	6632	10701	9937	9721	14425	13627	12989
	56.1667	5098	5522	5506	7107	6896	6596	10753	9986	9705	14432	13553	12955
	56.3333	5082	5515	5516	7096	6908	6634	10719	9975	9687	14427	13601	13031
	56.5	5109	5513	5515	7081	6894	6604	10715	9981	9684	14431	13601	13044
	56.6667	5077	5513	5527	7066	6915	6606	10729	9961	9667	14429	13568	12989
	56.8333	5092	5519	5490	7108	6896	6608	10757	9975	9670	14435	13582	13012
	57	5085	5539	5520	7071	6919	6607	10713	10001	9674	14435	13574	12981
	57.1667	5068	5515	5508	7087	6885	6621	10665	9977	9685	14431	13556	12975
	57.3333	5081	5527	5521	7109	6908	6616	10731	9994	9685	14428	13592	13007
	57.5	5091	5484	5497	7093	6915	6635	10731	10006	9704	14432	13553	12967
	57.6667	5089	5507	5506	7088	6928	6639	10714	9994	9728	14424	13580	13005
	57.8333	5082	5514	5501	7070	6918	6647	10720	10006	9763	14425	13585	13001
	58	5087	5521	5504	7091	6932	6606	10750	9997	9755	14428	13580	12979
	58.1667	5081	5527	5514	7065	6910	6592	10740	9992	9716	14426	13569	13027
	58.3333	5082	5505	5510	7107	6907	6650	10741	10050	9756	14427	13587	13045
	58.5	5080	5517	5505	7098	6903	6617	10719	9990	9733	14433	13589	13037
	58.6667	5071	5506	5492	7074	6881	6626	10772	9972	9717	14429	13595	13035
	58.8333	5063	5516	5480	7099	6916	6638	10786	9994	9723	14425	13573	13014
	59	5067	5515	5499	7068	6901	6601	10759	10003	9726	14431	13584	13021
	59.1667	5081	5527	5503	7095	6925	6614	10741	10000	9718	14427	13607	12966
	59.3333	5078	5490	5508	7090	6920	6616	10732	10004	9735	14425	13580	12989
	59.5	5083	5520	5510	7068	6909	6614	10760	9951	9714	14425	13542	12995
	59.6667	5084	5508	5490	7109	6924	6633	10741	9953	9741	14428	13598	12999
	59.8333	5088	5521	5500	7095	6907	6635	10770	10002	9731	14426	13584	12975
	60	5108	5497	5500	7084	6939	6625	10717	10015	9731	14431	13626	13019
	60.1667	5091	5506	5508	7089	6919	6619	10759	10022	9747	14427	13629	12999
	60.3333	5074	5501	5496	7075	6924	6614	10770	10010	9707	14414	13672	12970
	60.5	5086	5504	5498	7078	6907	6635	10729	9985	9746	14407	13619	13002
	60.6667	5078	5514	5512	7076	6929	6627	10769	10050	9733	14419	13645	12985
	60.8333	5063	5510	5503	7051	6912	6616	10756	10046	9741	14470	13611	12972
	61	5068	5505	5493	7079	6928	6642	10799	10014	9746	14415	13621	13010
	61.1667	5068	5492	5495	7053	6913	6616	10787	10032	9789	14438	13616	13067
	61.3333	5064	5480	5495	7069	6929	6636	10796	10020	9763	14424	13659	13008
	61.5	5075	5499	5485	7066	6903	6618	10768	10027	9767	14430	13676	13026
	61.6667	5077	5503	5498	7083	6908	6617	10765	10046	9767	14427	13689	13021
	61.8333	5065	5508	5492	7076	6906	6626	10757	10021	9778	14428	13607	13011
	62	5064	5510	5490	7078	6921	6651	10794	9997	9765	14429	13648	13045
	62.1667	5071	5490	5480	7088	6911	6631	10820	9990	9728	14423	13679	13001
	62.3333	5085	5500	5489	7066	6911	6617	10793	10050	9739	14435	13649	13072
	62.5	5067	5500	5489	7091	6909	6616	10767	10038	9737	14430	13687	12995
	62.6667	5073	5508	5485	7078	6929	6627	10762	10001	9752	14425	13642	12966
	62.8333	5070	5496	5484	7086	6892	6629	10770	10044	9756	14431	13626	12999
	63	5094	5498	5482	7078	6918	6646	10803	10052	9745	14430	13672	13037
	63.1667	5082	5512	5478	7087	6905	6622	10814	10019	9757	14429	13637	13015
	63.3333	5082	5503	5492	7073	6908	6633	10755	10034	9719	14431	13603	12990
	63.5	5067	5493	5497	7062	6926	6623	10788	10028	9759	14425	13687	13067
	63.6667	5074	5495	5489	7097	6892	6633	10790	10098	9795	14342	13600	13038
	63.8333	5057	5495	5491	7081	6925	6630	10762	10043	9831	14338	13657	13009
	64	5103	5485	5508	7076	6941	6636	10824	10062	9798	14359	13664	13042
	64.1667	5076	5498	5472	7069	6916	6622	10810	10045	9795	14380	13605	13025
	64.3333	5087	5492	5494	7074	6922	6633	10753	10037	9812	14308	13602	13000
	64.5	5069	5490	5513	7073	6904	6639	10766	10058	9801	14368	13618	12988
	64.6667	5062	5480	5480	7052	6914	6639	10824	10016	9783	14331	13694	13015
	64.8333	5067	5489	5492	7058	6914	6632	10789	10053	9771	14374	13620	13006
	65	5071	5489	5508	7045	6916	6627	10816	10030	9756	14319	13655	13048
	65.1667	5078	5485	5485	7071	6896	6623	10783	10007	9768	14318	13610	12976
	65.3333	5054	5484	5488	7055	6921	6628	10823	10014	9764	14356	13643	13006
	65.5	5076	5482	5483	7042	6929	6632	10781	10036	9754	14347	13601	12991
	65.6667	5067	5478	5483	7047	6908	6641	10780	10024	9778	14334	13668	12992
	65.8333	5041	5492	5493	7048	6916	6625	10773	10073	9788	14376	13635	13035
	66	5097	5497	5465	7068	6898	6645	10858	10024	9776	14390	13630	13024
	66.1667	5066	5489	5492	7027	6927	6619	10822	10054	9789	14367	13653	12990
	66.3333	5074	5491	5500	7058	6925	6627	10820	10074	9788	14365	13650	12970
	66.5	5072	5508	5499	7061	6909	6638	10755	10038	9798	14320	13648	13004
	66.6667	5047	5472	5486	7056	6932	6631	10820	10082	9817	14356	13642	12986
	66.8333	5083	5494	5497	7053	6921	6629	10785	9996	9786	14355	13667	12998
	67	5065	5513	5502	7034	6902	6635	10798	10047	9801	14345	13696	12989
	67.1667	5071	5480	5493	7052	6934	6627	10847	10063	9858	14360	13602	13020
	67.3333	5067	5492	5481	7058	6923	6641	10777	10091	9832	14326	13594	13001
	67.5	5042	5508	5469	7063	6913	6638	10815	10072	9819	14341	13605	13028
	67.6667	5073	5485	5496	7051	6915	6614	10834	10076	9783	14327	13624	13048
	67.8333	5049	5488	5487	7071	6911	6636	10816	10062	9773	14365	13606	13004
	68	5058	5483	5504	7047	6910	6620	10828	10053	9833	14325	13555	12998
	68.1667	5022	5483	5479	7064	6924	6654	10827	10036	9807	14389	13593	12991
	68.3333	5069	5493	5475	7050	6920	6637	10840	10051	9826	14324	13625	12989
	68.5	5077	5465	5467	7054	6911	6616	10842	10066	9794	14339	13633	13021
	68.6667	5092	5492	5489	7042	6914	6650	10805	10124	9813	14343	13622	13027
	68.8333	5067	5500	5473	7092	6905	6640	10827	10059	9837	14356	13608	13001
	69	5090	5499	5481	7058	6898	6645	10876	10066	9825	14380	13586	13052
	69.1667	5074	5486	5468	7073	6907	6650	10867	10086	9834	14384	13637	13048
	69.3333	5041	5497	5487	7062	6901	6653	10862	10095	9838	14394	13674	13000
	69.5	5039	5502	5475	7030	6900	6640	10821	10089	9816	14380	13659	13036
	69.6667	5051	5493	5477	7044	6902	6636	10847	10097	9794	14415	13640	13034
	69.8333	5050	5481	5414	7034	6914	6644	10834	10073	9822	14404	13688	13013
	70	5067	5469	5406	7047	6896	6658	10869	10079	9829	14451	13688	13026
	70.1667	5059	5496	5427	7059	6918	6655	10840	10103	9825	14410	13681	12973
	70.3333	5045	5487	5403	7058	6906	6657	10807	10081	9818	14405	13656	12994
	70.5	5061	5504	5405	7020	6902	6628	10817	10068	9818	14396	13702	12994
	70.6667	5063	5479	5427	7046	6912	6638	10852	10071	9779	14415	13636	12996
	70.8333	5055	5475	5434	7019	6899	6656	10839	10078	9787	14412	13625	13010
	71	5051	5467	5445	7025	6896	6668	10865	10071	9781	14441	13633	13005
	71.1667	5060	5489	5442	7022	6910	6651	10868	10056	9796	14427	13622	13000
	71.3333	5064	5473	5446	7070	6895	6630	10850	10068	9829	14424	13608	13011
	71.5	5071	5481	5462	7065	6896	6632	10882	10072	9807	14430	13586	13027
	71.6667	5063	5468	5459	7054	6888	6650	10862	10074	9804	14427	13637	13043
	71.8333	5030	5487	5436	7033	6906	6655	10849	10043	9792	14432	13674	12977
	72	5047	5475	5452	7050	6905	6649	10838	10090	9831	14426	13659	12975
	72.1667	5077	5477	5477	7043	6893	6650	10818	10125	9838	14426	13640	13018
	72.3333	5046	5462	5467	7039	6907	6641	10834	10095	9838	14426	13688	13053
	72.5	5038	5459	5471	7019	6886	6644	10856	10110	9857	14421	13688	13006
	72.6667	5052	5436	5459	7031	6918	6655	10849	10133	9840	14426	13681	12994
	72.8333	5040	5452	5493	6998	6904	6652	10846	10090	9830	14422	13656	12969
	73	5052	5477	5462	7025	6913	6639	10821	10055	9810	14425	13702	12972
	73.1667	5041	5467	5487	7015	6922	6651	10822	10083	9810	14423	13636	12928
	73.3333	5054	5471	5464	7013	6913	6629	10842	10077	9799	14423	13614	12998
	73.5	5048	5459	5421	7037	6914	6644	10846	10061	9778	14427	13645	12951
	73.6667	5030	5493	5427	7040	6917	6608	10816	10076	9838	14421	13657	12983
	73.8333	5061	5462	5433	7016	6918	6623	10835	10101	9799	14433	13643	12993
	74	5041	5487	5407	7006	6915	6617	10879	10069	9809	14439	13654	12969

## Sheet: Sup. Fig. 3b
PSMα1
		Conc. mg/ml	ThT end point avr.	Sd						Total Conc. mg/ml	Conc. mM	I.G	Sd
		0.05	5725	293						0.3	0.132	0.00305017	0.000198592
		0.075	7923	206						0.325	0.144	0.00450838	0.000279376
		0.1	12261	318						0.35	0.155	0.00635686	0.000154835
		0.25	16081	263						0.375	0.166	0.00916363	0.000245716

## Sheet: Sup. Fig. 3c
PSMα3 monomer conccentration= 0.5 mg/ml
Seeds= 20%, 30%, 40%, 60% to that of monomeric concentartion
		0.2	0.2	0.2	0.3	0.3	0.3	0.4	0.4	0.4	0.6	0.6	0.6
	Time (h)	0.23 mM	0.23 mM	0.23 mM	0.25 mM	0.25 mM	0.25 mM	0.27 mM	0.27 mM	0.27 mM	0.30 mM	0.30 mM	0.30 mM
	0	345	314	354	893	941	900	1204	1219	1348	1426	1451	1649
	0.00555556	414	375	427	1040	1064	1029	1397	1387	1438	1701	1646	1965
	0.0111111	499	445	522	1210	1208	1153	1593	1587	1682	2023	1844	2319
	0.0166667	594	528	616	1390	1352	1301	1822	1815	1958	2393	2079	2735
	0.0222222	698	612	734	1589	1516	1460	2081	2055	2253	2826	2342	3170
	0.0277778	810	708	866	1801	1679	1622	2335	2301	2399	3277	2567	3675
	0.0333333	945	829	1010	2032	1856	1792	2595	2572	2697	3752	2828	4175
	0.0388889	1080	938	1169	2257	2040	1980	2868	2835	3189	4257	3073	4671
	0.0444444	1229	1069	1329	2476	2203	2149	3135	3118	3512	4745	3340	5183
	0.05	1367	1205	1503	2680	2386	2316	3390	3379	3810	5165	3606	5685
	0.0555556	1512	1337	1662	2863	2544	2472	3629	3629	4060	5623	3836	6174
	0.0611111	1638	1472	1815	3035	2681	2622	3835	3852	4302	6008	4103	6644
	0.0666667	1765	1599	1949	3181	2808	2738	4032	4070	4508	6336	4329	7062
	0.0722222	1857	1729	2062	3317	2939	2862	4236	4233	4702	6683	4573	7472
	0.0777778	1957	1818	2154	3432	3035	2953	4340	4425	4861	6964	4781	7863
	0.0833333	2014	1911	2238	3550	3126	3047	4482	4554	5005	7245	4988	8206
	0.0888889	2096	1979	2294	3628	3217	3131	4627	4694	5136	7472	5194	8558
	0.0944444	2141	2052	2338	3720	3301	3198	4731	4814	5251	7697	5376	8871
	0.1	2178	2106	2382	3770	3357	3262	4833	4947	5376	7962	5551	9199
	0.105556	2213	2143	2412	3848	3410	3309	4935	5049	5486	8164	5713	9509
	0.111111	2239	2184	2445	3926	3482	3380	5013	5168	5591	8404	5908	9863
	0.116667	2254	2215	2446	3976	3529	3410	5111	5275	5693	8576	6108	10157
	0.122222	2273	2248	2476	4049	3602	3474	5197	5379	5787	8799	6291	10456
	0.127778	2314	2267	2497	4098	3652	3514	5256	5457	5903	9035	6502	10778
	0.133333	2322	2275	2499	4128	3672	3567	5365	5533	5979	9294	6700	11117
	0.138889	2348	2297	2496	4188	3718	3582	5413	5632	6052	9506	6941	11442
	0.144444	2367	2300	2523	4229	3748	3630	5503	5742	6167	9807	7205	11753
	0.15	2384	2316	2509	4267	3802	3658	5557	5853	6242	10017	7469	12039
	0.155556	2398	2325	2517	4294	3810	3662	5628	5950	6363	10346	7799	12347
	0.161111	2407	2345	2516	4308	3827	3719	5725	6028	6406	10613	8148	12719
	0.166667	2419	2359	2509	4364	3875	3735	5782	6132	6503	10971	8524	13087
	0.172222	2418	2366	2510	4407	3880	3768	5871	6243	6609	11234	8936	13430
	0.177778	2404	2367	2502	4416	3918	3777	5937	6314	6742	11430	9332	13767
	0.183333	2406	2378	2485	4447	3932	3802	6041	6384	6870	11676	9748	14202
	0.188889	2400	2396	2485	4470	3938	3830	6162	6487	6980	11856	10063	14618
	0.194444	2403	2388	2497	4474	3963	3834	6278	6526	7097	12004	10325	15045
	0.2	2407	2399	2504	4475	3989	3869	6327	6625	7222	12179	10522	15463
	0.205556	2406	2389	2504	4505	3991	3893	6409	6703	7324	12384	10687	15763
	0.211111	2404	2405	2492	4515	4019	3916	6515	6777	7418	12568	10856	16034
	0.216667	2403	2390	2488	4539	4054	3904	6555	6876	7546	12734	11010	16180
	0.222222	2397	2395	2481	4567	4060	3950	6677	6948	7653	12862	11259	16340
	0.227778	2388	2392	2484	4575	4083	3942	6738	6989	7716	13028	11464	16542
	0.233333	2391	2388	2494	4585	4095	3970	6806	7081	7834	13197	11750	16689
	0.238889	2382	2392	2476	4606	4109	4001	6910	7127	7916	13374	12024	16801
	0.244444	2379	2376	2483	4600	4126	4012	6988	7191	7996	13417	12184	17017
	0.25	2384	2381	2461	4633	4143	4022	7061	7287	8074	13521	12323	17127
	0.255556	2395	2390	2484	4626	4164	4035	7096	7385	8168	13636	12456	17229
	0.261111	2383	2386	2475	4665	4168	4060	7182	7437	8236	13740	12547	17309
	0.266667	2393	2384	2485	4661	4179	4051	7227	7536	8283	13854	12572	17474
	0.272222	2388	2400	2485	4687	4203	4088	7302	7552	8320	13856	12628	17521
	0.277778	2383	2391	2497	4695	4223	4121	7333	7606	8386	13988	12627	17580
	0.283333	2374	2401	2510	4693	4216	4123	7425	7675	8459	14113	12745	17629
	0.288889	2380	2423	2511	4708	4245	4125	7488	7697	8478	14133	12814	17800
	0.294444	2387	2423	2517	4735	4232	4161	7526	7765	8553	14270	12860	17916
	0.3	2387	2426	2534	4745	4251	4159	7580	7811	8583	14275	12857	17892
	0.305556	2408	2439	2534	4748	4250	4198	7629	7844	8604	14283	12935	17960
	0.311111	2390	2462	2539	4791	4272	4194	7687	7874	8674	14382	13036	18077
	0.316667	2415	2473	2534	4768	4287	4220	7764	7939	8703	14431	13020	17982
	0.322222	2429	2481	2536	4779	4302	4239	7794	7945	8754	14469	13107	18046
	0.327778	2451	2515	2541	4788	4326	4242	7851	7981	8767	14545	13119	18132
	0.333333	2441	2506	2543	4786	4351	4251	7892	8016	8805	14571	13212	18199
	0.338889	2439	2517	2557	4795	4327	4285	7947	8068	8877	14617	13269	18257
	0.344444	2446	2514	2556	4803	4355	4285	7967	8090	8863	14647	13296	18247
	0.35	2447	2535	2572	4796	4346	4292	7999	8087	8962	14706	13371	18369
	0.355556	2449	2527	2577	4786	4370	4318	8019	8110	8946	14798	13384	18400
	0.361111	2458	2536	2586	4818	4363	4326	8077	8131	9020	14883	13418	18406
	0.366667	2447	2532	2589	4833	4392	4354	8132	8109	9050	14758	13414	18538
	0.372222	2450	2521	2598	4814	4394	4344	8155	8170	9071	14834	13492	18429
	0.377778	2450	2526	2598	4848	4425	4376	8199	8188	9115	14847	13509	18476
	0.383333	2457	2527	2620	4839	4407	4380	8207	8244	9106	14915	13515	18541
	0.388889	2460	2531	2603	4852	4438	4403	8272	8248	9169	14919	13499	18464
	0.394444	2453	2531	2618	4848	4447	4392	8283	8248	9256	14900	13589	18422
	0.4	2460	2535	2644	4850	4445	4396	8309	8275	9222	14995	13566	18502
	0.405556	2472	2528	2649	4858	4457	4417	8334	8319	9264	14940	13653	18609
	0.411111	2469	2527	2645	4854	4469	4445	8367	8270	9268	14985	13597	18534
	0.416667	2483	2541	2672	4860	4464	4452	8396	8339	9283	15011	13622	18568
	0.422222	2479	2525	2675	4851	4454	4456	8368	8313	9306	15071	13632	18575
	0.427778	2484	2529	2667	4856	4491	4430	8413	8347	9312	15037	13707	18602
	0.433333	2487	2529	2671	4853	4467	4484	8472	8350	9331	14998	13650	18565
	0.438889	2484	2516	2663	4858	4482	4481	8466	8334	9382	15008	13728	18659
	0.444444	2499	2521	2672	4889	4518	4471	8490	8404	9360	15060	13762	18621
	0.45	2479	2533	2683	4869	4490	4480	8539	8390	9389	15018	13765	18646
	0.455556	2503	2512	2679	4870	4497	4495	8536	8414	9404	14988	13816	18675
	0.461111	2498	2520	2690	4878	4500	4517	8582	8415	9449	15027	13787	18680
	0.466667	2501	2525	2701	4891	4499	4514	8531	8408	9395	15015	13868	18670
	0.472222	2493	2526	2688	4896	4527	4512	8588	8402	9418	15009	13796	18584
	0.477778	2506	2542	2691	4890	4526	4516	8569	8428	9452	15053	13823	18686
	0.483333	2491	2522	2710	4878	4529	4524	8579	8430	9425	15072	13842	18706
	0.488889	2508	2524	2710	4888	4545	4536	8662	8421	9436	14991	13842	18648
	0.494444	2510	2519	2714	4886	4544	4554	8612	8476	9492	14984	13872	18625
	0.5	2511	2518	2709	4882	4534	4545	8655	8453	9447	14968	13833	18665
	0.505556	2508	2531	2719	4874	4558	4540	8688	8483	9507	14963	13905	18528
	0.511111	2509	2532	2715	4887	4536	4537	8670	8478	9501	14920	13863	18598
	0.516667	2506	2527	2729	4897	4541	4551	8694	8434	9483	14969	13876	18658
	0.522222	2486	2537	2732	4908	4538	4552	8687	8500	9474	14944	13819	18677
	0.527778	2509	2543	2715	4878	4543	4566	8698	8496	9541	14953	13857	18705
	0.533333	2503	2533	2727	4892	4549	4555	8757	8497	9525	14907	13830	18649
	0.538889	2504	2524	2726	4892	4557	4571	8732	8474	9526	14883	13908	18693
	0.544444	2495	2541	2739	4894	4514	4578	8755	8517	9521	14932	13891	18620
	0.55	2512	2535	2751	4889	4564	4590	8719	8509	9520	14889	13901	18558
	0.555556	2514	2541	2735	4902	4551	4582	8748	8507	9586	14903	13870	18592
	0.561111	2498	2540	2738	4894	4586	4565	8767	8516	9554	14876	13838	18706
	0.566667	2510	2540	2730	4883	4547	4561	8769	8513	9507	14869	13875	18567
	0.572222	2511	2534	2741	4891	4558	4585	8786	8497	9542	14936	13834	18584
	0.577778	2506	2543	2740	4932	4553	4595	8811	8477	9580	14892	13885	18608
	0.583333	2513	2535	2736	4891	4577	4579	8788	8518	9564	14871	13852	18540
	0.588889	2516	2544	2756	4887	4568	4581	8814	8554	9569	14868	13891	18594
	0.594444	2507	2536	2744	4874	4573	4599	8785	8531	9522	14937	13836	18582
	0.6	2507	2536	2749	4895	4564	4594	8845	8569	9596	14815	13878	18554
	0.605556	2512	2548	2759	4889	4558	4601	8819	8495	9492	14846	13869	18537
	0.611111	2510	2535	2746	4873	4593	4605	8861	8569	9573	14843	13881	18480
	0.616667	2506	2558	2772	4877	4572	4609	8833	8555	9615	14802	13795	18473
	0.622222	2515	2546	2769	4879	4578	4607	8855	8552	9538	14734	13869	18444
	0.627778	2514	2550	2771	4877	4582	4629	8859	8568	9559	14796	13855	18464
	0.633333	2520	2531	2779	4891	4584	4624	8864	8548	9572	14784	13891	18501
	0.638889	2504	2550	2778	4871	4552	4624	8875	8585	9556	14771	13801	18388
	0.644444	2509	2565	2774	4893	4591	4622	8869	8536	9568	14799	13879	18420
	0.65	2510	2553	2775	4871	4589	4641	8881	8556	9580	14722	13874	18374
	0.655556	2521	2566	2778	4888	4570	4623	8898	8594	9593	14755	13837	18446
	0.661111	2515	2561	2789	4869	4591	4624	8888	8578	9569	14741	13873	18377
	0.666667	2511	2556	2783	4890	4575	4618	8863	8556	9527	14714	13813	18357
	0.672222	2506	2554	2798	4884	4569	4632	8874	8564	9580	14695	13865	18276
	0.677778	2523	2566	2801	4856	4568	4620	8908	8568	9534	14701	13814	18279
	0.683333	2525	2576	2797	4886	4566	4634	8867	8534	9619	14627	13829	18298
	0.688889	2511	2564	2798	4892	4567	4621	8893	8551	9605	14668	13813	18299
	0.694444	2539	2569	2777	4881	4575	4613	8908	8588	9605	14672	13794	18251
	0.7	2521	2575	2805	4848	4578	4621	8879	8565	9594	14593	13821	18294
	0.705556	2542	2586	2808	4874	4563	4638	8921	8555	9548	14607	13776	18286
	0.711111	2529	2564	2805	4869	4574	4646	8896	8547	9579	14654	13769	18217
	0.716667	2541	2575	2806	4885	4568	4646	8891	8534	9595	14652	13817	18190
	0.722222	2539	2572	2800	4881	4574	4617	8935	8575	9568	14543	13813	18204
	0.727778	2545	2581	2801	4879	4562	4636	8937	8585	9576	14515	13768	18067
	0.733333	2538	2577	2808	4853	4606	4645	8872	8561	9616	14587	13768	18140
	0.738889	2559	2580	2804	4878	4568	4648	8900	8573	9542	14484	13766	18066
	0.744444	2546	2590	2803	4854	4564	4630	8904	8525	9558	14531	13786	18063
	0.75	2538	2578	2810	4861	4574	4667	8882	8558	9574	14528	13736	18078
	0.755556	2553	2592	2801	4866	4583	4630	8878	8593	9538	14483	13811	18066
	0.761111	2556	2589	2814	4845	4553	4658	8912	8535	9556	14521	13791	18027
	0.766667	2542	2583	2809	4873	4584	4628	8916	8541	9553	14494	13761	18062
	0.772222	2533	2600	2823	4860	4569	4628	8898	8541	9566	14507	13740	18019
	0.777778	2531	2585	2829	4852	4576	4670	8925	8559	9542	14483	13801	18064
	0.783333	2550	2585	2818	4851	4575	4663	8930	8534	9564	14433	13788	18022
	0.788889	2547	2589	2819	4859	4549	4639	8932	8546	9579	14465	13696	17922
	0.794444	2543	2603	2818	4841	4579	4643	8920	8521	9569	14449	13725	17949
	0.8	2559	2593	2826	4847	4571	4666	8940	8513	9600	14442	13689	17947
	0.805556	2545	2609	2818	4836	4587	4631	8884	8545	9585	14332	13762	17938
	0.811111	2555	2585	2814	4830	4555	4638	8939	8559	9535	14427	13749	17849
	0.816667	2543	2594	2835	4854	4568	4642	8892	8547	9520	14386	13697	17955
	0.822222	2554	2599	2827	4858	4567	4650	8912	8509	9545	14361	13705	17838
	0.827778	2556	2597	2844	4854	4569	4649	8907	8522	9554	14354	13675	17889
	0.833333	2552	2605	2834	4844	4579	4662	8933	8506	9539	14375	13710	17845
	0.838889	2567	2608	2834	4831	4563	4649	8949	8547	9535	14319	13657	17847
	0.844444	2551	2602	2834	4843	4558	4655	8906	8529	9532	14364	13663	17816
	0.85	2571	2614	2830	4867	4558	4635	8924	8509	9572	14253	13696	17794
	0.855556	2558	2606	2836	4841	4564	4620	8911	8543	9512	14344	13694	17782
	0.861111	2549	2613	2845	4861	4558	4662	8966	8514	9555	14391	13666	17758
	0.866667	2567	2604	2843	4839	4546	4664	8933	8555	9518	14276	13682	17752
	0.872222	2571	2601	2858	4832	4555	4673	8928	8478	9510	14274	13684	17678
	0.877778	2566	2617	2834	4831	4546	4647	8938	8502	9560	14293	13620	17703
	0.883333	2555	2608	2846	4826	4552	4633	8925	8497	9468	14200	13645	17709
	0.888889	2571	2605	2860	4854	4558	4656	8923	8509	9560	14210	13611	17699
	0.894444	2559	2627	2843	4845	4534	4657	8891	8497	9522	14206	13610	17698
	0.9	2553	2626	2846	4844	4552	4637	8911	8492	9492	14242	13634	17590
	0.905556	2567	2618	2840	4829	4545	4646	8883	8499	9507	14207	13562	17609
	0.911111	2560	2621	2843	4825	4556	4665	8867	8524	9524	14199	13699	17606
	0.916667	2570	2611	2849	4849	4533	4637	8888	8517	9542	14165	13621	17685
	0.922222	2564	2621	2852	4844	4538	4647	8880	8494	9549	14162	13593	17541
	0.927778	2561	2623	2860	4835	4542	4658	8847	8502	9546	14160	13559	17558
	0.933333	2567	2633	2834	4837	4560	4641	8922	8448	9509	14177	13536	17532
	0.938889	2562	2638	2857	4840	4555	4682	8906	8528	9546	14203	13579	17597
	0.944444	2556	2632	2839	4836	4543	4641	8865	8519	9552	14114	13652	17547
	0.95	2576	2626	2851	4820	4554	4662	8902	8487	9501	14121	13608	17538
	0.955556	2562	2638	2856	4843	4555	4658	8906	8528	9530	14067	13640	17573
	0.961111	2558	2641	2858	4836	4517	4643	8858	8494	9547	14177	13594	17518
	0.966667	2568	2635	2849	4784	4520	4649	8927	8505	9529	14053	13603	17469
	0.972222	2563	2633	2865	4840	4533	4633	8878	8494	9504	14114	13575	17488
	0.977778	2552	2637	2857	4840	4533	4643	8868	8472	9544	14049	13562	17415
	0.983333	2568	2639	2856	4818	4526	4637	8846	8502	9506	14114	13587	17444
	0.988889	2553	2644	2844	4806	4529	4649	8894	8480	9496	14081	13534	17445
	0.994444	2568	2638	2860	4821	4530	4663	8871	8486	9511	14045	13585	17406
	1	2565	2644	2873	4827	4518	4641	8860	8515	9493	14047	13551	17405
	1.00556	2565	2651	2855	4794	4520	4640	8898	8457	9477	14009	13553	17365
	1.01111	2574	2666	2878	4804	4533	4627	8869	8458	9525	13987	13547	17371
	1.01667	2569	2650	2877	4803	4545	4641	8886	8494	9511	13971	13547	17303
	1.02222	2569	2650	2865	4805	4524	4647	8861	8456	9478	13970	13540	17272
	1.02778	2576	2660	2857	4805	4509	4628	8881	8507	9528	13994	13523	17298
	1.03333	2575	2661	2883	4794	4515	4638	8878	8418	9483	13933	13457	17283
	1.03889	2568	2664	2866	4821	4505	4640	8871	8455	9518	13968	13469	17295
	1.04444	2576	2660	2882	4806	4516	4635	8877	8431	9519	13970	13476	17252
	1.05	2570	2666	2871	4823	4534	4641	8852	8462	9517	13941	13483	17238
	1.05556	2560	2668	2866	4791	4500	4631	8873	8425	9496	13952	13482	17287
	1.06111	2577	2655	2875	4815	4515	4636	8846	8465	9467	13895	13447	17234
	1.06667	2572	2666	2861	4792	4496	4630	8870	8434	9491	13923	13415	17223
	1.07222	2566	2677	2876	4808	4497	4632	8883	8429	9445	13891	13463	17220
	1.07778	2587	2666	2869	4806	4515	4649	8852	8428	9444	13835	13446	17161
	1.08333	2571	2676	2864	4774	4508	4650	8858	8503	9427	13898	13408	17141
	1.08889	2569	2672	2866	4780	4514	4624	8849	8428	9475	13832	13433	17206
	1.09444	2579	2677	2872	4770	4504	4638	8845	8386	9471	13850	13459	17142
	1.1	2585	2673	2879	4790	4502	4658	8846	8422	9462	13843	13407	17078
	1.10556	2576	2679	2872	4783	4500	4619	8866	8458	9420	13871	13383	17127
	1.11111	2585	2679	2871	4770	4491	4630	8823	8403	9490	13766	13411	17070
	1.11667	2581	2666	2871	4782	4509	4628	8833	8413	9481	13804	13327	17034
	1.12222	2584	2666	2881	4761	4509	4640	8811	8411	9452	13758	13375	17061
	1.12778	2583	2674	2875	4790	4497	4598	8832	8382	9442	13840	13339	17028
	1.13333	2576	2686	2883	4766	4502	4641	8831	8407	9442	13784	13324	17095
	1.13889	2564	2673	2879	4780	4477	4617	8834	8418	9406	13783	13350	17080
	1.14444	2578	2668	2875	4767	4493	4620	8797	8394	9413	13763	13361	16971
	1.15	2579	2685	2871	4764	4472	4607	8806	8472	9452	13705	13354	16979
	1.15556	2571	2682	2878	4791	4484	4638	8793	8418	9456	13716	13359	16976
	1.16111	2569	2683	2882	4777	4458	4603	8793	8427	9418	13704	13326	16936
	1.16667	2585	2679	2888	4763	4479	4646	8764	8409	9401	13752	13320	16942
	1.17222	2584	2694	2877	4769	4492	4645	8833	8375	9392	13725	13313	16949
	1.17778	2573	2711	2882	4771	4468	4626	8798	8410	9392	13726	13344	16900
	1.18333	2558	2691	2893	4747	4486	4606	8797	8382	9429	13630	13317	16948
	1.18889	2577	2692	2886	4739	4491	4623	8770	8374	9391	13664	13288	16905
	1.19444	2588	2690	2893	4736	4453	4602	8836	8421	9409	13678	13329	16858
	1.2	2575	2700	2890	4761	4493	4622	8806	8340	9356	13674	13377	16825
	1.20556	2577	2692	2887	4757	4490	4613	8801	8403	9409	13650	13267	16853
	1.21111	2584	2694	2897	4752	4473	4616	8798	8346	9366	13643	13268	16856
	1.21667	2575	2694	2870	4770	4467	4602	8777	8352	9416	13631	13286	16854
	1.22222	2592	2702	2898	4748	4451	4619	8769	8407	9401	13611	13245	16820
	1.22778	2586	2708	2895	4758	4463	4593	8771	8380	9433	13651	13226	16796
	1.23333	2583	2695	2894	4757	4476	4610	8770	8383	9429	13616	13226	16769
	1.23889	2573	2708	2877	4747	4471	4599	8759	8335	9362	13588	13246	16765
	1.24444	2587	2696	2897	4725	4455	4614	8759	8355	9338	13608	13238	16776
	1.25	2586	2716	2892	4736	4465	4609	8706	8328	9383	13558	13224	16797
	1.25556	2581	2715	2886	4730	4450	4630	8754	8332	9413	13617	13201	16766
	1.26111	2582	2707	2890	4749	4455	4604	8749	8331	9341	13584	13188	16740
	1.26667	2579	2707	2892	4711	4451	4598	8790	8327	9364	13567	13177	16766
	1.27222	2589	2701	2880	4733	4430	4605	8747	8365	9402	13513	13205	16664
	1.27778	2582	2710	2892	4733	4467	4617	8730	8359	9343	13590	13141	16679
	1.28333	2580	2703	2903	4730	4466	4589	8703	8324	9350	13529	13192	16673
	1.28889	2587	2708	2884	4738	4444	4579	8747	8367	9385	13496	13165	16683
	1.29444	2578	2704	2897	4733	4438	4600	8670	8340	9392	13541	13162	16603
	1.3	2570	2706	2885	4725	4461	4615	8724	8302	9351	13488	13129	16645
	1.30556	2578	2709	2895	4741	4441	4609	8723	8325	9395	13497	13155	16619
	1.31111	2587	2707	2897	4713	4459	4603	8739	8329	9359	13477	13164	16597
	1.31667	2572	2721	2884	4722	4446	4606	8718	8341	9350	13460	13135	16514
	1.32222	2584	2722	2893	4712	4430	4602	8710	8291	9359	13482	13122	16627
	1.32778	2580	2708	2886	4715	4445	4589	8742	8323	9340	13516	13117	16669
	1.33333	2563	2702	2898	4708	4448	4580	8729	8309	9361	13468	13090	16543
	1.33889	2574	2718	2897	4706	4432	4606	8723	8261	9335	13433	13049	16568
	1.34444	2574	2708	2900	4699	4433	4608	8737	8293	9315	13467	13126	16635
	1.35	2587	2726	2904	4724	4425	4590	8709	8339	9326	13428	13097	16531
	1.35556	2586	2714	2896	4709	4420	4598	8698	8297	9309	13384	13092	16611
	1.36111	2578	2715	2892	4728	4433	4623	8686	8308	9329	13438	13093	16473
	1.36667	2571	2701	2903	4709	4426	4604	8696	8321	9322	13333	13055	16556
	1.37222	2581	2712	2897	4697	4417	4602	8706	8247	9352	13367	13071	16454
	1.37778	2572	2711	2899	4708	4454	4580	8696	8279	9341	13398	13008	16488
	1.38333	2577	2722	2901	4698	4425	4590	8687	8269	9325	13380	13042	16515
	1.38889	2576	2729	2907	4717	4428	4610	8696	8275	9334	13398	13057	16402
	1.39444	2587	2712	2897	4699	4436	4594	8672	8274	9362	13324	13048	16391
	1.4	2582	2719	2910	4684	4403	4603	8694	8286	9303	13369	13017	16376
	1.40556	2582	2721	2900	4700	4427	4590	8685	8280	9285	13353	12999	16439
	1.41111	2569	2715	2903	4672	4418	4596	8638	8237	9312	13299	13033	16403
	1.41667	2585	2712	2907	4700	4412	4596	8669	8248	9310	13353	12978	16366
	1.42222	2581	2718	2908	4679	4399	4580	8669	8268	9266	13356	13016	16384
	1.42778	2571	2718	2903	4689	4419	4590	8677	8276	9280	13326	13024	16395

## Sheet: Sup. Fig. 3d
PSMα3
		Conc. mg/ml	ThT end point avr.	Sd				Total Conc. mg/ml	Conc. mM	I.G	Sd
		0.3	4870	706				0.6	0.23	0.494747	0.0504588
		0.4	7025	533				0.65	0.249	0.82809	0.0932282
		0.6	9961	1899				0.7	0.268	1.16859	0.0156035
		0.8	11720	596				0.8	0.306	1.75918	0.143182

## Sheet: Sup. Fig. 3e
PSMβ1 monomer conccentration= 0.025 mg/ml
Seeds= 20%, 30%, 40%, 50% to that of monomeric concentartion
		0.2	0.2	0.2	0.3	0.3	0.3	0.4	0.4	0.4	0.5	0.5	0.5
	Time (h)	6.6 μM	6.6 μM	6.6 μM	7.2 μM	7.2 μM	7.2 μM	7.7 μM	7.7 μM	7.7 μM	8.3 μM	8.3 μM	8.3 μM
	0	1287	1370	1353	1543	1506	1492	1768	1759	1785	1992	2091	2166
	0.166667	1334	1410	1343	1616	1579	1555	1881	1996	1900	2115	2214	2296
	0.333333	1358	1533	1389	1693	1662	1642	1997	2116	2024	2285	2381	2453
	0.5	1394	1588	1444	1794	1774	1713	2168	2253	2159	2490	2583	2662
	0.666667	1470	1636	1538	1910	1858	1844	2293	2341	2296	2652	2812	2881
	0.833333	1534	1718	1561	1998	2001	1950	2365	2433	2375	2838	2968	3042
	1	1603	1783	1638	2110	2109	2061	2539	2577	2463	2954	3097	3163
	1.16667	1641	1857	1658	2225	2197	2132	2658	2734	2552	3050	3189	3287
	1.33333	1729	1885	1738	2343	2299	2241	2771	2870	2759	3175	3287	3434
	1.5	1797	1942	1793	2453	2382	2324	2945	3009	2931	3284	3444	3565
	1.66667	1856	2029	1854	2556	2467	2414	3027	3107	3043	3454	3716	3847
	1.83333	1872	2088	1908	2625	2569	2484	3173	3200	3189	3664	3872	4063
	2	1952	2210	1980	2682	2646	2553	3279	3335	3295	3893	4108	4279
	2.16667	2068	2310	2083	2760	2707	2629	3385	3409	3403	4029	4283	4435
	2.33333	2129	2372	2152	2847	2735	2759	3466	3518	3459	4171	4418	4579
	2.5	2197	2432	2232	2904	2803	2870	3563	3553	3567	4363	4552	4715
	2.66667	2283	2503	2311	3000	2936	2926	3634	3679	3667	4501	4641	4848
	2.83333	2287	2559	2348	3102	2974	3025	3722	3761	3757	4578	4802	4983
	3	2370	2570	2423	3183	3107	3127	3787	3793	3810	4648	4853	5014
	3.16667	2401	2645	2476	3217	3201	3185	3837	3870	3912	4770	4979	5168
	3.33333	2478	2638	2456	3307	3253	3203	3909	3910	3922	4830	5059	5198
	3.5	2480	2703	2489	3296	3293	3260	3965	3992	4019	4918	5093	5289
	3.66667	2568	2697	2522	3387	3347	3308	3980	3992	4088	4970	5191	5373
	3.83333	2580	2711	2560	3428	3409	3376	4066	4068	4082	5040	5248	5517
	4	2621	2767	2603	3447	3440	3393	4065	4107	4127	5102	5292	5572
	4.16667	2658	2821	2612	3492	3496	3442	4121	4134	4172	5122	5341	5599
	4.33333	2695	2827	2640	3520	3486	3512	4186	4154	4188	5182	5370	5594
	4.5	2724	2865	2678	3559	3526	3516	4188	4231	4235	5244	5461	5734
	4.66667	2745	2870	2686	3595	3536	3583	4212	4248	4278	5264	5456	5724
	4.83333	2772	2882	2709	3601	3588	3619	4261	4251	4307	5279	5454	5713
	5	2795	2893	2762	3618	3651	3608	4284	4313	4313	5343	5527	5815
	5.16667	2844	2940	2738	3654	3669	3641	4330	4355	4356	5361	5564	5823
	5.33333	2896	2944	2766	3656	3684	3702	4349	4350	4361	5345	5586	5893
	5.5	2896	3009	2804	3687	3697	3734	4383	4408	4405	5451	5623	5914
	5.66667	2922	2987	2834	3707	3739	3720	4400	4388	4424	5433	5607	5945
	5.83333	2939	3002	2828	3741	3779	3760	4408	4440	4452	5444	5662	5949
	6	2951	3028	2874	3698	3779	3783	4443	4453	4461	5512	5688	5965
	6.16667	3002	3048	2876	3749	3843	3827	4459	4490	4479	5461	5676	5993
	6.33333	3038	3077	2904	3788	3827	3782	4494	4466	4493	5509	5769	6000
	6.5	3028	3080	2884	3780	3831	3843	4485	4509	4505	5551	5726	6049
	6.66667	3021	3066	2935	3771	3876	3851	4495	4515	4541	5569	5756	6083
	6.83333	3084	3105	2927	3794	3914	3868	4477	4563	4556	5591	5785	6099
	7	3051	3120	2951	3816	3933	3930	4564	4568	4537	5565	5841	6112
	7.16667	3088	3156	3003	3854	3931	3942	4552	4612	4559	5576	5811	6143
	7.33333	3094	3185	2987	3850	3934	3912	4548	4619	4563	5622	5821	6139
	7.5	3130	3159	2970	3858	3941	3987	4601	4607	4608	5643	5838	6184
	7.66667	3095	3178	2993	3877	3983	3979	4627	4648	4631	5701	5882	6222
	7.83333	3133	3196	3036	3920	4011	4045	4658	4636	4648	5647	5912	6235
	8	3126	3234	3040	3909	4018	3997	4633	4679	4645	5717	5914	6248
	8.16667	3148	3228	3057	3954	4063	4023	4666	4704	4651	5674	5919	6251
	8.33333	3188	3266	3054	3987	4074	4021	4756	4661	4687	5694	5915	6319
	8.5	3204	3275	3118	3958	4031	4098	4712	4726	4703	5733	5954	6313
	8.66667	3223	3260	3109	3970	4061	4106	4704	4713	4703	5741	5993	6304
	8.83333	3228	3271	3102	3989	4099	4131	4735	4729	4767	5774	6015	6355
	9	3178	3330	3168	4059	4132	4113	4754	4752	4701	5787	6001	6367
	9.16667	3268	3347	3161	4035	4131	4181	4766	4793	4753	5814	6024	6359
	9.33333	3253	3339	3190	4047	4165	4172	4825	4798	4718	5786	6072	6350
	9.5	3269	3335	3191	4039	4130	4161	4816	4828	4822	5830	6029	6413
	9.66667	3284	3354	3206	4061	4187	4179	4825	4850	4845	5854	6114	6379
	9.83333	3320	3375	3223	4072	4183	4223	4871	4891	4801	5763	6116	6429
	10	3305	3407	3251	4123	4223	4223	4852	4866	4799	5877	6106	6472
	10.1667	3343	3425	3255	4092	4228	4260	4888	4870	4811	5871	6172	6501
	10.3333	3353	3426	3271	4138	4258	4317	4907	4863	4876	5944	6156	6496
	10.5	3341	3449	3298	4169	4286	4281	4879	4918	4879	5966	6199	6546
	10.6667	3390	3476	3290	4192	4246	4344	4937	4949	4885	5939	6141	6559
	10.8333	3408	3477	3289	4179	4286	4355	4992	4979	4913	5932	6195	6573
	11	3413	3483	3356	4196	4273	4339	4978	4980	4944	5916	6201	6599
	11.1667	3413	3495	3342	4254	4306	4396	4949	4948	4911	5974	6231	6611
	11.3333	3414	3525	3359	4237	4346	4411	4997	4973	4976	5963	6241	6574
	11.5	3438	3537	3350	4213	4314	4444	4978	4995	4967	5943	6226	6689
	11.6667	3463	3550	3419	4255	4349	4427	5023	4973	4984	5946	6255	6646
	11.8333	3453	3597	3411	4310	4382	4477	5057	5020	4988	6055	6252	6662
	12	3483	3612	3405	4293	4356	4483	5070	5051	4999	6029	6303	6743
	12.1667	3506	3630	3439	4293	4453	4492	5051	5049	5035	6037	6290	6728
	12.3333	3522	3665	3470	4273	4452	4475	5085	5125	4981	6027	6297	6734
	12.5	3575	3650	3489	4352	4469	4529	5113	5077	5037	6044	6325	6777
	12.6667	3561	3647	3522	4380	4462	4552	5159	5117	5072	6090	6356	6783
	12.8333	3625	3717	3515	4397	4488	4590	5161	5148	5100	6082	6334	6815
	13	3621	3713	3531	4414	4500	4618	5109	5239	5082	6090	6402	6819
	13.1667	3632	3729	3547	4417	4511	4625	5167	5204	5125	6167	6383	6827
	13.3333	3629	3782	3588	4429	4547	4697	5219	5220	5104	6110	6413	6891
	13.5	3678	3760	3596	4452	4598	4653	5256	5238	5159	6098	6508	6903
	13.6667	3688	3816	3634	4471	4632	4718	5270	5277	5171	6146	6436	6976
	13.8333	3738	3782	3650	4504	4616	4779	5292	5262	5177	6162	6422	6993
	14	3760	3858	3658	4507	4608	4781	5305	5320	5185	6185	6492	6973
	14.1667	3773	3908	3690	4573	4666	4796	5369	5329	5234	6216	6491	7022
	14.3333	3776	3914	3718	4530	4704	4812	5295	5401	5246	6226	6579	7023
	14.5	3801	3943	3736	4553	4668	4849	5398	5391	5283	6175	6518	7056
	14.6667	3862	3929	3745	4613	4703	4897	5409	5390	5301	6254	6561	7105
	14.8333	3838	3956	3811	4596	4743	4906	5410	5459	5310	6230	6562	7144
	15	3879	4000	3842	4601	4731	4923	5465	5488	5329	6258	6628	7132
	15.1667	3914	4014	3842	4639	4765	4973	5445	5425	5319	6290	6592	7165
	15.3333	3916	4012	3913	4652	4795	4964	5529	5541	5361	6317	6625	7213
	15.5	3962	4017	3880	4710	4817	5041	5533	5555	5358	6324	6598	7175
	15.6667	3979	4068	3959	4706	4819	5061	5541	5552	5401	6346	6647	7250
	15.8333	3995	4085	3961	4721	4817	5057	5605	5578	5425	6318	6635	7286
	16	4017	4129	4007	4808	4836	5120	5620	5597	5469	6345	6684	7327
	16.1667	4020	4146	4030	4799	4879	5109	5599	5644	5481	6370	6735	7331
	16.3333	4063	4175	4038	4810	4898	5196	5633	5653	5481	6360	6716	7298
	16.5	4114	4155	4080	4825	4985	5215	5643	5669	5486	6373	6686	7368
	16.6667	4142	4192	4129	4866	4972	5264	5696	5645	5513	6386	6724	7345
	16.8333	4141	4239	4135	4881	5017	5246	5719	5692	5518	6417	6746	7429
	17	4162	4270	4152	4838	5036	5232	5763	5730	5520	6447	6766	7382
	17.1667	4234	4287	4193	4913	5040	5322	5786	5725	5559	6419	6773	7459
	17.3333	4243	4281	4229	4941	5107	5376	5785	5757	5561	6445	6779	7442
	17.5	4273	4342	4213	4938	5131	5352	5760	5731	5521	6494	6761	7432
	17.6667	4282	4375	4304	4963	5146	5454	5765	5749	5546	6473	6797	7444
	17.8333	4337	4384	4291	5007	5189	5472	5776	5768	5570	6475	6807	7497
	18	4352	4421	4359	5030	5193	5471	5782	5808	5570	6425	6769	7452
	18.1667	4412	4432	4391	5046	5176	5532	5800	5747	5538	6486	6852	7475
	18.3333	4407	4487	4416	5012	5188	5558	5756	5765	5589	6477	6840	7385
	18.5	4438	4504	4468	5087	5271	5572	5764	5774	5632	6465	6797	7432
	18.6667	4463	4514	4447	5089	5245	5614	5795	5739	5609	6493	6800	7459
	18.8333	4514	4534	4517	5132	5277	5665	5764	5778	5637	6476	6810	7452
	19	4536	4552	4531	5167	5298	5654	5723	5852	5645	6458	6850	7407

## Sheet: Sup. Fig. 3f
PSMβ1
		Conc. mg/ml	Conc µM	ThT end point avr.	Sd				Total Conc. mg/ml	Conc µM	I.G	Sd
		0.02	4.4484	4273	456				0.03	6.6	0.209899	0.0309091
		0.0225	5.00445	5544	512				0.0325	7.2	0.35596	0.00969697
		0.025	5.5605	6942	568				0.035	7.7	0.449293	0.0187879
		0.03	6.6726	7969	134				0.0375	8.3	0.630303	0.0145455

## Sheet: Sup. Fig. 3g
PSMβ2 monomer conccentration= 0.25 mg/ml
Seeds= 20%, 30%, 40%, 50% to that of monomeric concentartion
		0.2	0.2	0.2	0.3	0.3	0.3	0.4	0.4	0.4	0.5	0.5	0.5
	Time (h)	0.067 mM	0.067 mM	0.067 mM	0.072 mM	0.072 mM	0.072 mM	0.078 mM	0.078 mM	0.078 mM	0.083 mM	0.083 mM	0.083 mM
	0	0.05	0.05	0.05	0.075	0.075	0.075	0.1	0.1	0.1	0.15	0.15	0.15
	0.166667	607	713	645	753	709	760	942	964	933	1131	1235	1340
	0.333333	647	733	677	789	735	799	990	997	969	1261	1381	1455
	0.5	669	756	714	865	753	831	1037	1044	1013	1304	1425	1556
	0.666667	693	789	738	911	785	879	1072	1058	1055	1421	1543	1678
	0.833333	720	811	756	959	814	894	1116	1116	1108	1524	1602	1762
	1	740	839	779	1010	841	933	1150	1161	1217	1602	1745	1848
	1.16667	755	895	791	1041	869	967	1221	1206	1277	1707	1814	1900
	1.33333	765	920	817	1085	908	1020	1283	1234	1332	1764	1865	1967
	1.5	789	961	838	1118	949	1058	1342	1279	1388	1809	1924	2023
	1.66667	802	1004	861	1144	983	1092	1379	1315	1439	1844	1973	2047
	1.83333	817	1026	879	1176	1021	1127	1433	1376	1475	1896	2015	2097
	2	827	1041	897	1202	1055	1160	1489	1419	1530	1937	2054	2122
	2.16667	845	1067	920	1229	1075	1176	1517	1475	1552	1994	2082	2143
	2.33333	860	1061	911	1250	1111	1202	1547	1471	1583	2006	2104	2169
	2.5	878	1063	930	1268	1137	1225	1583	1507	1629	2027	2129	2184
	2.66667	887	1065	947	1291	1155	1248	1607	1532	1652	2059	2160	2200
	2.83333	902	1067	960	1302	1174	1270	1635	1553	1689	2086	2178	2215
	3	924	1078	963	1320	1189	1284	1657	1583	1708	2098	2194	2231
	3.16667	944	1081	987	1330	1200	1301	1677	1605	1741	2130	2224	2245
	3.33333	953	1092	994	1341	1203	1315	1703	1631	1758	2145	2237	2269
	3.5	967	1097	1013	1350	1225	1339	1724	1646	1775	2162	2244	2278
	3.66667	978	1117	1017	1365	1237	1343	1747	1664	1798	2173	2267	2294
	3.83333	994	1121	1034	1375	1251	1365	1765	1683	1817	2196	2260	2298
	4	1000	1135	1041	1389	1263	1371	1794	1701	1829	2219	2286	2304
	4.16667	1014	1139	1059	1396	1280	1384	1804	1721	1859	2221	2304	2319
	4.33333	1029	1149	1063	1414	1297	1392	1834	1745	1867	2245	2322	2342
	4.5	1041	1148	1071	1417	1301	1406	1833	1747	1878	2262	2329	2341
	4.66667	1058	1163	1086	1430	1305	1422	1851	1762	1915	2269	2335	2342
	4.83333	1067	1175	1093	1439	1320	1440	1864	1781	1926	2286	2340	2377
	5	1074	1169	1107	1448	1331	1435	1876	1791	1922	2279	2360	2377
	5.16667	1080	1181	1113	1454	1345	1454	1882	1807	1942	2304	2366	2378
	5.33333	1091	1198	1116	1461	1355	1469	1895	1821	1958	2304	2384	2387
	5.5	1089	1202	1119	1484	1359	1470	1912	1834	1982	2324	2388	2397
	5.66667	1100	1203	1131	1482	1372	1486	1934	1835	1980	2327	2396	2394
	5.83333	1107	1218	1143	1499	1367	1498	1941	1859	1988	2332	2414	2403
	6	1117	1223	1145	1492	1381	1501	1956	1864	2011	2345	2418	2429
	6.16667	1132	1235	1154	1508	1389	1504	1969	1871	2016	2351	2419	2414
	6.33333	1135	1229	1162	1515	1399	1522	1972	1885	2035	2362	2438	2434
	6.5	1134	1238	1165	1519	1407	1533	1984	1891	2033	2376	2438	2436
	6.66667	1147	1237	1167	1535	1413	1536	1994	1905	2057	2385	2453	2441
	6.83333	1156	1249	1178	1536	1421	1541	2007	1923	2063	2391	2455	2458
	7	1163	1257	1188	1546	1423	1548	2009	1921	2081	2415	2471	2462
	7.16667	1167	1266	1186	1551	1435	1558	2022	1931	2085	2401	2472	2473
	7.33333	1178	1274	1205	1556	1448	1567	2035	1939	2094	2413	2492	2479
	7.5	1173	1274	1197	1558	1449	1576	2046	1958	2105	2424	2498	2495
	7.66667	1181	1280	1199	1572	1459	1576	2052	1954	2109	2441	2497	2486
	7.83333	1185	1282	1217	1575	1463	1587	2062	1970	2120	2450	2500	2494
	8	1192	1298	1216	1582	1469	1591	2066	1976	2117	2451	2519	2490
	8.16667	1196	1297	1221	1587	1479	1598	2087	1972	2133	2453	2518	2506
	8.33333	1206	1295	1222	1606	1483	1604	2079	1996	2145	2470	2535	2520
	8.5	1209	1304	1231	1602	1481	1612	2089	2000	2150	2472	2530	2528
	8.66667	1211	1313	1238	1614	1491	1621	2110	2020	2161	2471	2543	2524
	8.83333	1228	1317	1245	1614	1499	1624	2114	2020	2160	2486	2549	2535
	9	1224	1319	1251	1633	1508	1621	2115	2025	2185	2502	2565	2550
	9.16667	1228	1327	1248	1638	1517	1639	2114	2035	2188	2495	2568	2540
	9.33333	1233	1334	1258	1637	1522	1631	2142	2038	2185	2507	2574	2544
	9.5	1240	1326	1256	1641	1528	1645	2146	2042	2196	2507	2578	2554
	9.66667	1239	1333	1260	1642	1537	1651	2147	2059	2221	2525	2574	2568
	9.83333	1256	1344	1267	1663	1536	1645	2164	2061	2223	2522	2582	2565
	10	1262	1353	1268	1659	1545	1672	2156	2069	2213	2537	2595	2581
	10.1667	1259	1359	1281	1663	1543	1668	2172	2078	2235	2541	2592	2580
	10.3333	1262	1366	1286	1664	1556	1683	2176	2083	2233	2539	2592	2585
	10.5	1267	1374	1286	1666	1557	1677	2176	2088	2232	2559	2615	2582
	10.6667	1281	1371	1293	1686	1566	1684	2195	2094	2251	2558	2619	2590
	10.8333	1279	1374	1301	1686	1562	1694	2205	2106	2255	2556	2614	2598
	11	1281	1388	1298	1688	1570	1702	2207	2111	2267	2565	2634	2597
	11.1667	1291	1384	1295	1685	1577	1710	2204	2120	2272	2575	2623	2601
	11.3333	1293	1389	1306	1696	1573	1703	2219	2117	2273	2569	2651	2618
	11.5	1289	1396	1307	1698	1585	1716	2216	2124	2279	2581	2640	2614
	11.6667	1300	1394	1310	1713	1598	1721	2231	2124	2289	2591	2643	2612
	11.8333	1312	1405	1315	1714	1595	1717	2227	2142	2286	2591	2665	2615
	12	1307	1409	1320	1723	1595	1724	2231	2162	2299	2606	2666	2624
	12.1667	1313	1413	1330	1723	1609	1742	2237	2144	2307	2614	2666	2633
	12.3333	1321	1415	1329	1717	1609	1737	2233	2163	2314	2609	2669	2632
	12.5	1322	1427	1337	1726	1626	1743	2262	2170	2323	2633	2678	2643
	12.6667	1330	1423	1339	1731	1627	1745	2255	2172	2321	2636	2690	2635
	12.8333	1336	1433	1338	1729	1622	1746	2264	2176	2329	2621	2683	2649
	13	1334	1434	1348	1739	1623	1755	2271	2185	2334	2644	2690	2657
	13.1667	1328	1448	1351	1744	1623	1759	2275	2195	2331	2648	2692	2646
	13.3333	1342	1438	1345	1749	1636	1761	2275	2189	2350	2645	2701	2658
	13.5	1349	1446	1349	1746	1639	1770	2291	2193	2346	2645	2709	2666
	13.6667	1354	1454	1351	1753	1652	1780	2296	2192	2344	2655	2719	2672
	13.8333	1352	1451	1356	1758	1644	1776	2291	2202	2352	2654	2724	2672
	14	1363	1460	1364	1763	1644	1777	2295	2218	2363	2662	2715	2671
	14.1667	1358	1466	1364	1774	1650	1782	2314	2216	2370	2658	2734	2685
	14.3333	1369	1471	1370	1768	1663	1786	2302	2218	2360	2674	2720	2678
	14.5	1376	1478	1377	1762	1658	1800	2309	2223	2385	2673	2731	2687
	14.6667	1379	1480	1372	1769	1665	1797	2328	2236	2393	2686	2743	2684
	14.8333	1378	1489	1380	1778	1680	1800	2337	2224	2396	2689	2750	2685
	15	1380	1488	1384	1779	1671	1806	2327	2244	2391	2691	2744	2692
	15.1667	1388	1490	1390	1775	1674	1803	2345	2234	2401	2695	2751	2697
	15.3333	1399	1492	1392	1788	1679	1814	2329	2249	2399	2696	2761	2698
	15.5	1398	1494	1407	1794	1681	1818	2354	2252	2413	2709	2755	2713
	15.6667	1411	1510	1411	1796	1694	1823	2360	2257	2405	2719	2772	2706
	15.8333	1414	1508	1409	1801	1690	1830	2366	2255	2417	2718	2764	2727
	16	1412	1515	1410	1801	1693	1827	2361	2270	2418	2721	2767	2711
	16.1667	1423	1517	1414	1809	1698	1841	2364	2269	2433	2730	2773	2729
	16.3333	1423	1521	1412	1813	1699	1840	2375	2281	2420	2726	2794	2728
	16.5	1429	1527	1422	1802	1702	1845	2370	2286	2443	2739	2790	2733
	16.6667	1432	1529	1432	1817	1715	1845	2379	2283	2441	2742	2798	2730
	16.8333	1440	1537	1428	1810	1707	1855	2386	2279	2445	2746	2794	2731
	17	1437	1545	1441	1814	1709	1852	2386	2285	2454	2760	2814	2736
	17.1667	1450	1551	1436	1816	1724	1854	2391	2304	2462	2760	2806	2736
	17.3333	1453	1550	1439	1821	1726	1857	2400	2303	2467	2761	2814	2740
	17.5	1465	1552	1442	1827	1731	1869	2406	2309	2470	2762	2816	2739
	17.6667	1466	1554	1445	1827	1728	1868	2406	2311	2472	2771	2807	2759
	17.8333	1465	1567	1455	1829	1732	1871	2413	2319	2463	2768	2804	2753
	18	1478	1567	1456	1831	1738	1883	2415	2316	2483	2778	2832	2745
	18.1667	1475	1572	1455	1832	1736	1879	2423	2322	2478	2770	2837	2756
	18.3333	1481	1578	1465	1845	1741	1879	2420	2333	2484	2790	2838	2756
	18.5	1491	1577	1473	1849	1738	1893	2427	2345	2495	2789	2842	2764
	18.6667	1498	1584	1468	1850	1745	1893	2420	2336	2502	2783	2841	2766
	18.8333	1500	1601	1474	1845	1745	1894	2434	2329	2510	2788	2849	2755
	19	1500	1595	1472	1859	1743	1903	2446	2334	2499	2801	2847	2769

## Sheet: Sup. Fig. 3h
PSMβ2
		Conc. mg/ml	ThT end point avr.	Sd						Total Conc. mg/ml	Conc µM	I.G	Sd
		0.05	419	8.17						0.3	0.067325	0.00482486	0.00110055
		0.075	579	14.85						0.325	0.0729354	0.00718081	0.00063365
		0.1	867	30.24						0.35	0.0785458	0.0098596	0.0011339
		0.25	1778	158.13						0.375	0.0841562	0.0138725	0.00043355
