# Supplementary material for: Cross-talk between individual phenol-soluble modulins in Staphylococcus aureus biofilm enables rapid and efficient amyloid formation
Source: eLife. 2020 Dec 1;9:e59776. doi: 10.7554/eLife.59776 (PMC7732344; doi:10.7554/eLife.59776)
Supplement: Figure 1—source data 1. [file elife-59776-fig1-data1.xlsx]

## Sheet: Fig. 1a
PSMα1 kinetics
PSMα1 monomeric concentration in mg/ml
	Time (h)	0.05 mg/ml	0.05 mg/ml	0.05 mg/ml	0.075 mg /ml	0.075 mg /ml	0.075 mg /ml	0.1 mg/ml	0.1 mg/ml	0.1 mg/ml	0.25 mg/ml	0.25 mg/ml	0.25 mg/ml	0.5 mg/ml	0.5 mg/ml	0.5 mg/ml	1 mg/ml	1 mg/ml	1 mg/ml
	0	112	112	111	124	125	176	150	135	134	134	135	138	114	123	125	235	391	178
	0.166667	110	110	106	116	120	166	138	122	120	127	123	128	106	113	114	211	366	169
	0.333333	107	104	105	117	112	147	129	120	117	121	118	122	107	109	110	202	353	164
	0.5	103	107	105	113	112	143	124	117	117	115	117	119	103	111	110	194	352	161
	0.666667	103	102	105	116	115	141	124	115	114	116	113	116	103	109	106	195	348	160
	0.833333	103	104	102	111	112	141	122	114	115	111	117	120	105	105	106	194	352	157
	1	101	104	102	108	112	142	123	112	114	113	115	112	103	108	107	198	351	157
	1.16667	103	106	100	112	112	140	125	114	113	111	114	120	104	105	106	197	359	161
	1.33333	102	104	102	112	114	139	122	110	111	113	115	119	102	108	106	194	357	157
	1.5	101	105	99	112	112	134	122	111	107	111	109	114	100	105	103	199	361	156
	1.66667	101	103	99	109	112	137	125	111	113	111	113	117	103	109	106	200	362	153
	1.83333	99	102	102	117	115	137	125	112	110	112	114	116	101	104	105	196	365	159
	2	103	101	102	110	111	136	123	113	109	112	114	117	101	105	102	194	357	153
	2.16667	102	101	100	109	113	135	125	115	112	113	113	114	100	106	110	199	366	157
	2.33333	98	101	100	111	111	136	123	111	112	112	111	115	98	103	104	198	367	161
	2.5	102	101	101	111	111	140	121	113	114	113	114	114	98	102	107	200	368	161
	2.66667	101	103	101	114	112	136	118	107	113	110	110	113	99	102	102	202	369	158
	2.83333	99	101	100	110	109	135	118	110	109	113	112	119	100	106	106	201	370	159
	3	100	102	97	111	109	139	120	112	110	111	112	116	97	102	105	199	371	156
	3.16667	97	102	97	111	110	137	122	112	109	110	111	117	101	106	104	202	366	156
	3.33333	101	96	100	107	110	133	120	108	108	108	111	113	99	104	106	205	364	156
	3.5	97	100	101	110	110	136	121	113	109	112	113	115	100	104	104	204	368	161
	3.66667	99	98	99	112	112	137	121	111	108	111	109	116	101	108	105	201	367	162
	3.83333	99	101	102	111	110	138	121	113	114	110	116	117	98	101	104	199	371	155
	4	100	102	99	111	113	139	121	112	111	110	113	117	100	106	105	203	370	158
	4.16667	99	100	102	111	108	135	119	109	108	111	112	116	97	105	108	203	369	156
	4.33333	99	99	100	113	109	136	116	109	107	109	113	111	100	106	103	200	375	159
	4.5	99	103	101	111	109	136	120	111	110	108	112	116	100	105	106	204	375	156
	4.66667	98	102	101	108	114	134	121	111	110	112	109	117	101	105	105	204	375	160
	4.83333	99	101	98	112	111	136	120	110	109	110	113	117	98	104	103	205	371	155
	5	98	102	100	109	112	134	119	109	109	107	113	114	99	104	102	206	374	157
	5.16667	98	101	101	109	109	135	119	111	111	109	108	115	100	105	107	205	373	154
	5.33333	97	100	98	108	109	134	120	109	106	110	110	113	98	104	101	205	378	159
	5.5	98	99	99	108	111	135	121	112	112	112	111	115	100	107	107	206	377	156
	5.66667	98	99	100	110	109	135	123	113	110	110	113	114	97	104	104	208	377	159
	5.83333	97	101	98	111	108	134	119	109	111	111	109	116	99	106	101	205	377	157
	6	97	101	99	110	110	134	121	111	109	107	109	117	100	104	104	206	380	155
	6.16667	98	99	99	110	111	132	120	113	110	112	112	115	97	108	104	206	380	157
	6.33333	94	99	98	111	111	133	122	113	109	110	114	115	100	106	108	205	378	157
	6.5	96	100	98	111	111	133	119	113	110	110	113	114	96	103	104	210	381	159
	6.66667	97	101	98	109	111	133	121	111	111	111	111	112	100	102	107	208	382	156
	6.83333	97	98	98	111	109	137	119	114	106	107	114	113	101	102	103	210	381	159
	7	97	99	97	109	109	135	118	110	110	111	112	117	98	105	105	208	382	155
	7.16667	97	96	97	110	107	136	123	110	111	109	111	115	102	106	101	206	382	160
	7.33333	100	101	98	110	112	134	119	110	109	111	110	116	100	106	105	211	385	161
	7.5	99	99	98	112	112	135	124	110	110	111	111	115	103	103	102	213	385	160
	7.66667	98	101	95	110	112	136	121	111	107	111	113	115	98	107	105	215	389	161
	7.83333	96	97	97	107	112	134	121	113	108	107	110	114	99	104	104	219	390	160
	8	98	97	99	112	107	135	119	114	110	108	112	116	97	106	106	216	393	164
	8.16667	96	101	98	111	109	136	120	110	108	107	109	114	99	106	105	218	394	161
	8.33333	96	99	95	112	110	134	123	113	110	112	114	115	99	108	108	221	396	163
	8.5	96	99	100	109	111	136	117	114	110	106	111	117	100	106	109	220	401	165
	8.66667	99	100	96	109	110	136	122	112	108	110	112	112	102	109	105	221	403	170
	8.83333	100	98	101	113	110	133	121	112	110	109	114	115	98	105	111	223	401	170
	9	95	99	98	110	111	135	121	110	107	108	112	116	97	109	107	226	407	172
	9.16667	95	97	98	111	110	137	119	109	110	111	112	113	101	111	112	229	415	176
	9.33333	97	101	98	111	112	131	118	111	110	110	112	114	101	110	113	232	414	178
	9.5	98	99	99	111	112	131	121	114	110	112	113	115	101	113	113	236	426	181
	9.66667	97	100	98	111	110	134	120	113	111	112	113	113	103	116	120	236	428	188
	9.83333	96	98	101	112	109	130	121	112	109	111	111	113	103	115	118	241	435	193
	10	99	98	100	108	111	132	119	112	110	109	115	114	108	115	118	250	447	198
	10.1667	98	97	99	112	112	136	123	111	110	115	113	115	112	119	121	250	454	199
	10.3333	97	99	98	110	112	134	122	113	112	112	111	113	112	122	124	256	466	209
	10.5	95	99	99	110	112	133	121	113	110	113	111	112	115	120	125	263	479	214
	10.6667	102	98	100	111	111	132	127	112	106	115	114	118	116	123	124	271	487	226
	10.8333	99	97	97	112	113	133	126	114	112	115	118	119	119	126	126	280	501	235
	11	98	95	96	109	110	135	123	113	110	114	118	118	126	125	128	288	515	248
	11.1667	96	98	100	112	110	134	124	113	112	118	118	118	129	131	130	294	532	253
	11.3333	97	97	101	110	112	134	125	110	111	116	115	122	135	138	137	303	548	264
	11.5	97	99	98	111	111	133	128	115	109	118	120	122	141	138	141	314	563	278
	11.6667	97	101	99	110	112	133	126	112	112	120	120	125	146	141	146	328	592	289
	11.8333	98	99	98	108	112	137	124	113	111	124	123	129	149	144	149	347	612	305
	12	96	98	100	113	112	133	127	113	109	124	123	130	165	145	158	357	640	321
	12.1667	97	98	99	111	113	135	126	112	109	129	126	138	173	152	164	377	666	337
	12.3333	96	97	99	109	110	133	127	112	109	130	126	137	181	158	168	392	691	357
	12.5	99	97	98	110	110	135	126	112	110	131	129	141	195	161	174	417	729	376
	12.6667	97	101	99	112	111	136	125	116	107	132	134	148	204	165	184	439	759	402
	12.8333	96	98	98	111	111	131	130	119	111	137	137	148	221	169	190	462	793	423
	13	97	97	101	109	109	135	128	116	110	136	136	152	232	175	200	492	821	449
	13.1667	93	101	102	112	111	135	130	116	113	142	142	158	246	181	211	515	874	473
	13.3333	95	100	100	110	110	132	126	114	111	143	144	164	258	188	223	544	907	503
	13.5	100	99	101	112	112	135	130	117	113	147	151	169	273	194	235	575	965	539
	13.6667	99	98	102	112	109	135	129	112	111	152	153	176	287	206	254	611	1004	569
	13.8333	96	101	98	110	115	136	129	116	112	159	155	183	296	209	265	642	1044	615
	14	99	99	101	108	111	136	129	114	112	167	160	189	314	220	281	685	1101	662
	14.1667	97	100	100	112	111	133	131	116	111	174	165	195	331	234	294	719	1154	700
	14.3333	97	102	101	112	114	135	128	112	111	178	168	201	349	242	310	760	1218	761
	14.5	98	100	100	113	112	137	128	118	111	186	176	204	372	257	327	809	1278	811
	14.6667	95	101	100	113	113	134	131	116	113	197	182	215	391	269	352	851	1335	874
	14.8333	97	101	98	114	114	137	132	114	115	202	188	221	415	287	373	896	1392	943
	15	95	101	101	110	112	139	133	121	117	209	195	234	434	300	403	956	1460	1012
	15.1667	97	99	103	113	113	135	135	116	120	220	203	242	458	318	423	1006	1530	1083
	15.3333	99	99	101	110	112	135	131	121	118	229	218	253	475	336	453	1068	1602	1162
	15.5	98	97	102	110	113	135	136	119	127	242	230	267	506	362	482	1126	1679	1244
	15.6667	98	100	103	112	115	134	134	121	125	251	246	275	524	381	514	1190	1749	1329
	15.8333	99	101	102	112	116	139	135	120	129	264	251	283	549	401	545	1252	1827	1416
	16	96	102	102	114	115	137	137	122	125	278	261	300	573	426	578	1317	1922	1523
	16.1667	103	100	103	111	115	136	138	123	134	281	267	302	596	457	617	1388	2005	1632
	16.3333	95	102	102	115	113	136	139	124	132	289	276	311	631	491	650	1468	2098	1722
	16.5	101	100	101	116	115	134	136	128	132	299	285	332	661	530	693	1548	2193	1833
	16.6667	101	102	101	117	112	137	143	125	138	307	292	335	689	567	730	1623	2296	1944
	16.8333	101	101	102	118	120	134	144	126	138	320	303	359	715	612	766	1717	2384	2053
	17	99	99	104	119	122	135	143	133	139	332	315	368	751	648	809	1803	2490	2182
	17.1667	102	100	105	120	124	138	147	130	143	346	324	384	781	687	856	1896	2598	2275
	17.3333	99	99	104	123	124	138	150	131	142	356	334	392	816	739	906	1985	2705	2399
	17.5	103	101	103	123	128	142	151	130	143	374	339	407	854	784	955	2082	2861	2534
	17.6667	101	101	106	121	127	146	150	133	146	386	356	423	901	831	1004	2185	2973	2660
	17.8333	100	102	105	123	131	154	151	135	150	399	363	434	937	882	1058	2278	3116	2771
	18	100	102	104	126	129	151	153	138	148	415	377	447	981	933	1109	2386	3280	2893
	18.1667	101	99	104	126	130	152	153	138	153	429	387	468	1025	988	1165	2489	3410	3024
	18.3333	99	101	104	130	135	153	156	139	154	445	395	480	1074	1039	1205	2589	3585	3157
	18.5	103	104	106	129	133	157	160	140	155	461	405	496	1125	1086	1278	2684	3744	3255
	18.6667	102	103	103	133	135	159	159	143	160	474	419	510	1173	1147	1323	2820	3908	3388
	18.8333	104	103	105	131	134	160	162	147	163	495	435	526	1220	1206	1385	2976	4099	3510
	19	102	100	107	137	146	166	166	148	163	506	441	542	1273	1267	1445	3172	4248	3630
	19.1667	102	102	105	139	146	173	170	148	169	533	455	552	1331	1327	1504	3385	4413	3749
	19.3333	102	103	106	142	147	178	172	152	168	550	468	568	1382	1388	1567	3610	4545	3845
	19.5	101	102	108	150	153	184	172	156	168	569	480	591	1439	1468	1629	3858	4680	3949
	19.6667	103	106	109	156	154	184	177	160	174	589	502	603	1503	1534	1706	4084	4816	4057
	19.8333	103	104	111	154	155	191	179	164	175	611	513	626	1569	1610	1772	4295	4915	4149
	20	100	105	109	160	160	188	185	164	177	635	530	646	1629	1703	1854	4466	5014	4251
	20.1667	105	105	113	160	166	192	186	167	180	656	541	666	1700	1777	1915	4621	5116	4336
	20.3333	105	106	112	166	167	202	189	168	181	681	558	689	1770	1860	1991	4792	5184	4446
	20.5	103	107	117	169	169	200	189	170	186	705	578	721	1842	1955	2090	4935	5297	4514
	20.6667	107	106	113	170	170	204	199	174	191	726	590	744	1916	2041	2158	5055	5349	4604
	20.8333	107	107	115	171	177	205	203	176	194	757	614	771	2003	2137	2244	5180	5449	4672
	21	105	108	117	178	182	213	209	185	198	789	635	799	2071	2239	2350	5263	5509	4732
	21.1667	105	106	117	181	180	215	215	189	201	821	658	830	2161	2327	2430	5413	5561	4807
	21.3333	104	108	116	180	182	226	217	188	203	847	682	857	2255	2430	2523	5514	5657	4864
	21.5	104	105	116	187	187	230	222	191	204	883	704	893	2355	2537	2612	5601	5724	4946
	21.6667	104	109	119	186	191	236	224	193	209	913	726	925	2450	2653	2740	5697	5788	5006
	21.8333	105	113	120	194	191	238	225	202	213	951	755	961	2561	2763	2831	5752	5847	5032
	22	105	110	119	192	200	245	237	203	219	989	778	1001	2684	2875	2936	5859	5883	5107
	22.1667	106	111	120	195	201	250	240	211	219	1029	809	1045	2795	2997	3046	5947	5953	5153
	22.3333	109	113	124	203	206	262	251	214	226	1067	838	1085	2928	3130	3165	6006	6013	5232
	22.5	106	112	125	201	213	269	256	216	229	1119	869	1135	3048	3272	3281	6066	6057	5293
	22.6667	111	117	127	206	212	270	262	221	236	1167	908	1178	3198	3402	3396	6152	6100	5323
	22.8333	110	114	126	211	214	275	271	224	232	1219	936	1231	3353	3550	3525	6194	6132	5392
	23	109	114	126	209	221	281	271	233	239	1261	974	1285	3490	3703	3660	6252	6212	5408
	23.1667	109	119	129	217	224	288	287	236	246	1317	1007	1335	3640	3842	3792	6290	6228	5490
	23.3333	111	119	129	219	228	293	289	242	250	1367	1043	1392	3809	3995	3915	6331	6276	5539
	23.5	110	121	130	220	229	296	299	248	255	1422	1081	1451	3994	4159	4045	6366	6307	5582
	23.6667	113	117	132	230	235	302	307	251	259	1472	1128	1510	4163	4301	4193	6425	6337	5634
	23.8333	113	123	132	232	238	313	317	261	267	1536	1173	1572	4361	4481	4332	6440	6400	5671
	24	115	124	135	235	245	324	329	262	271	1594	1205	1637	4572	4637	4476	6494	6436	5721
	24.1667	117	125	134	237	251	326	341	268	276	1671	1256	1702	4790	4825	4602	6543	6444	5774
	24.3333	115	127	137	238	250	335	349	279	281	1733	1308	1763	5010	4988	4749	6599	6489	5794
	24.5	115	130	137	247	251	342	367	285	287	1800	1339	1838	5219	5196	4905	6609	6534	5843
	24.6667	115	131	138	249	261	351	375	293	291	1852	1390	1909	5457	5362	5073	6637	6527	5878
	24.8333	117	128	137	255	267	357	392	300	295	1945	1434	1984	5697	5581	5233	6667	6615	5952
	25	120	133	143	257	270	363	405	301	306	2011	1485	2087	5941	5757	5399	6748	6567	5985
	25.1667	118	134	143	261	278	378	424	311	311	2092	1535	2188	6206	5967	5552	6782	6669	6007
	25.3333	119	135	145	264	281	381	437	320	323	2169	1590	2304	6463	6169	5727	6819	6673	6027
	25.5	122	139	144	269	284	385	459	331	330	2245	1641	2439	6733	6371	5893	6820	6695	6091
	25.6667	124	136	146	275	285	391	473	341	347	2318	1699	2590	7040	6587	6086	6870	6728	6130
	25.8333	123	141	151	280	291	403	498	357	349	2401	1757	2728	7326	6790	6257	6907	6740	6183
	26	121	143	149	282	295	414	526	367	365	2482	1801	2899	7694	6940	6428	6951	6784	6201
	26.1667	124	148	150	288	300	424	552	377	377	2561	1874	3040	8034	7153	6601	6968	6792	6253
	26.3333	123	147	153	293	308	429	585	387	383	2650	1919	3206	8418	7283	6767	7009	6818	6262
	26.5	126	148	157	297	313	437	619	404	400	2736	1981	3350	8791	7449	6938	7030	6825	6291
	26.6667	130	154	158	307	324	448	650	415	417	2834	2035	3495	9202	7657	7092	7043	6859	6311
	26.8333	127	155	155	309	329	457	669	430	428	2912	2103	3641	9477	7907	7220	7075	6886	6367
	27	133	159	161	315	340	464	699	447	445	2999	2163	3809	9726	8173	7336	7089	6918	6416
	27.1667	131	160	163	321	346	482	718	467	459	3097	2229	3942	9933	8463	7474	7130	6937	6439
	27.3333	133	166	163	327	352	483	740	485	475	3193	2289	4069	10133	8732	7599	7180	6937	6455
	27.5	136	165	166	334	357	494	763	501	500	3298	2361	4229	10452	9056	7835	7168	6954	6484
	27.6667	133	171	170	340	368	501	790	525	513	3410	2409	4371	10691	9382	8069	7203	6969	6529
	27.8333	138	172	176	350	375	514	813	542	533	3506	2502	4485	11057	9644	8277	7199	6998	6539
	28	139	178	173	358	386	526	840	562	552	3618	2563	4599	11281	9840	8553	7222	7029	6600
	28.1667	138	177	178	365	393	532	867	584	575	3722	2624	4676	11493	10052	8764	7257	7055	6630
	28.3333	141	187	181	370	402	543	902	609	592	3819	2689	4754	11660	10273	9015	7271	7039	6632
	28.5	143	188	185	379	413	549	929	637	613	3904	2765	4794	11836	10541	9234	7280	7070	6696
	28.6667	141	191	183	386	425	564	936	657	642	4005	2844	4844	11965	10897	9470	7316	7081	6714
	28.8333	147	192	187	397	439	575	947	688	662	4088	2924	4888	12074	11230	9727	7353	7086	6747
	29	147	196	192	405	452	584	966	713	691	4146	3010	4931	12147	11593	10064	7350	7120	6723
	29.1667	146	198	191	422	462	595	988	740	716	4220	3104	5023	12295	11957	10324	7357	7125	6801
	29.3333	147	205	201	424	476	609	1005	761	740	4293	3182	5060	12411	12105	10639	7410	7161	6811
	29.5	150	208	205	438	486	617	1035	789	770	4375	3296	5167	12461	12392	10937	7414	7159	6828
	29.6667	152	213	202	448	504	626	1056	816	798	4444	3382	5254	12496	12588	11174	7434	7189	6888
	29.8333	151	217	206	457	515	635	1074	847	828	4554	3483	5317	12575	12756	11422	7433	7181	6892
	30	143	220	211	475	530	651	1092	878	859	4637	3631	5429	12613	12842	11569	7444	7193	6925
	30.1667	145	227	216	484	549	661	1104	920	900	4721	3717	5529	12619	13025	11800	7463	7200	6926
	30.3333	159	232	218	497	562	675	1123	948	927	4824	3829	5642	12652	13137	11937	7489	7227	6966
	30.5	166	238	226	509	581	682	1151	987	964	4903	3945	5780	12731	13298	12100	7485	7216	6986
	30.6667	169	240	226	526	598	694	1182	1023	989	4992	4032	5912	12779	13416	12296	7484	7248	7019
	30.8333	177	245	229	537	614	705	1203	1069	1033	5086	4154	6064	12849	13550	12367	7526	7279	7038
	31	173	250	233	551	631	722	1225	1102	1057	5201	4249	6272	12915	13743	12533	7546	7284	7065
	31.1667	183	258	242	564	648	730	1258	1131	1089	5294	4335	6406	12973	13842	12620	7535	7278	7095
	31.3333	186	260	246	578	671	745	1285	1175	1124	5404	4437	6554	12967	14049	12815	7573	7304	7111
	31.5	189	268	249	592	693	754	1315	1216	1154	5498	4541	6700	13114	14142	12894	7573	7316	7127
	31.6667	192	273	251	609	705	765	1335	1257	1179	5587	4605	6843	13183	14269	12979	7613	7326	7146
	31.8333	197	277	257	626	725	783	1360	1303	1210	5685	4741	6978	13243	14332	13126	7624	7330	7175
	32	196	282	263	644	747	792	1364	1349	1231	5797	4840	7153	13344	14382	13263	7631	7364	7222
	32.1667	200	288	266	661	773	806	1369	1384	1261	5898	4909	7232	13480	14526	13315	7631	7378	7222
	32.3333	201	295	269	680	792	816	1356	1416	1280	5999	4987	7377	13508	14672	13390	7667	7371	7239
	32.5	202	301	276	697	812	829	1321	1473	1295	6114	5095	7468	13631	14765	13451	7669	7386	7281
	32.6667	204	309	283	724	838	845	1309	1532	1321	6248	5212	7604	13736	14749	13551	7657	7388	7280
	32.8333	205	317	286	743	861	856	1388	1570	1357	6382	5274	7685	13800	14816	13668	7699	7414	7318
	33	207	323	292	762	884	870	1414	1614	1391	6562	5355	7785	13887	14982	13720	7724	7405	7328
	33.1667	209	327	299	775	913	881	1494	1655	1439	6731	5456	7929	13996	14993	13828	7716	7435	7373
	33.3333	214	337	302	796	935	897	1538	1702	1473	6938	5550	8007	14089	15069	13902	7708	7437	7370
	33.5	216	345	313	815	959	912	1583	1742	1512	7106	5640	8162	14172	15192	14003	7743	7430	7405
	33.6667	215	351	317	842	988	925	1641	1791	1546	7328	5724	8288	14222	15213	14061	7745	7461	7436
	33.8333	220	363	323	855	1013	937	1697	1822	1587	7530	5813	8414	14320	15285	14093	7753	7442	7452
	34	220	367	331	870	1041	956	1753	1850	1610	7703	5943	8512	14356	15303	14173	7790	7468	7473
	34.1667	224	376	340	901	1069	974	1817	1892	1662	7951	6024	8641	14436	15402	14230	7807	7479	7496
	34.3333	221	385	344	927	1098	992	1888	1895	1689	8185	6134	8754	14463	15449	14355	7779	7481	7543
	34.5	243	390	355	948	1133	1012	1963	1934	1728	8341	6206	8871	14501	15653	14445	7780	7490	7516
	34.6667	263	408	363	976	1159	1017	2042	1982	1786	8576	6337	8999	14594	15582	14495	7790	7507	7576
	34.8333	280	408	371	994	1186	1045	2117	2024	1813	8724	6452	9094	14601	15571	14534	7836	7491	7601
	35	299	428	381	1014	1222	1057	2199	2086	1844	8869	6570	9240	14586	15647	14634	7824	7515	7605
	35.1667	306	428	383	1040	1249	1076	2265	2130	1885	9008	6677	9322	14729	15641	14648	7852	7538	7604
	35.3333	314	441	394	1059	1280	1098	2343	2180	1920	9189	6779	9399	14760	15673	14722	7869	7542	7625
	35.5	332	444	400	1085	1319	1115	2434	2229	1952	9290	6894	9523	14741	15778	14807	7870	7541	7673
	35.6667	343	455	409	1099	1355	1128	2513	2258	1979	9443	7026	9612	14783	15836	14902	7881	7563	7718
	35.8333	352	467	422	1125	1384	1152	2588	2294	2013	9570	7149	9690	14877	15971	14960	7899	7546	7715
	36	364	479	434	1154	1420	1165	2660	2332	2047	9627	7247	9754	14928	15951	14997	7888	7602	7718
	36.1667	377	487	440	1177	1453	1195	2743	2367	2067	9814	7406	9897	14977	15992	15070	7901	7599	7754
	36.3333	390	497	447	1193	1484	1212	2805	2430	2124	9979	7544	9943	14956	15985	15079	7929	7578	7767
	36.5	405	506	459	1228	1525	1228	2875	2483	2150	10092	7621	10016	14975	16076	15225	7930	7607	7762
	36.6667	408	519	470	1250	1567	1258	2948	2532	2229	10279	7791	10144	15039	16038	15305	7932	7630	7811
	36.8333	425	530	483	1279	1597	1276	3029	2571	2262	10408	7955	10227	15080	16089	15314	7955	7634	7859
	37	435	542	490	1298	1632	1297	3127	2627	2295	10571	8050	10302	15045	16209	15391	7972	7649	7851
	37.1667	448	554	506	1325	1665	1318	3187	2659	2341	10676	8211	10372	15149	16214	15412	7948	7656	7896
	37.3333	458	567	511	1349	1692	1340	3276	2709	2384	10788	8410	10442	15106	16245	15398	7991	7635	7893
	37.5	473	577	525	1373	1732	1365	3333	2752	2400	10931	8575	10548	15136	16175	15451	8020	7660	7899
	37.6667	485	586	535	1397	1766	1391	3388	2787	2393	11111	8788	10641	15205	16274	15488	7985	7660	7937
	37.8333	491	603	550	1428	1806	1417	3465	2828	2397	11200	9018	10711	15206	16306	15547	8032	7670	7941
	38	511	616	566	1452	1847	1440	3532	2866	2489	11337	9184	10810	15250	16318	15602	8019	7683	7937
	38.1667	527	633	578	1474	1868	1469	3600	2926	2623	11423	9381	10864	15262	16284	15644	8076	7689	7966
	38.3333	535	636	588	1513	1910	1494	3675	2976	2727	11494	9565	10935	15251	16260	15625	8028	7683	7984
	38.5	552	658	602	1535	1949	1523	3720	3019	2803	11589	9791	11042	15313	16401	15757	8046	7708	8006
	38.6667	561	665	616	1566	1972	1553	3790	3063	2861	11702	9989	11071	15373	16348	15771	8017	7672	8016
	38.8333	571	681	629	1597	1993	1570	3848	3118	2920	11839	10215	11137	15357	16395	15777	8023	7674	8027
	39	591	695	639	1621	2018	1603	3914	3158	2965	11894	10353	11163	15279	16416	15794	8032	7667	8038
	39.1667	612	713	658	1657	2045	1637	3978	3197	2999	11996	10492	11271	15371	16395	15784	8026	7688	8048
	39.3333	621	721	672	1690	2073	1666	4041	3266	2992	12020	10633	11320	15369	16396	15882	8033	7664	8021
	39.5	635	739	685	1733	2100	1694	4095	3309	3055	12188	10769	11391	15432	16447	15859	8032	7689	8081
	39.6667	652	752	699	1761	2111	1731	4153	3361	2709	12231	10841	11453	15395	16488	15971	8055	7689	8065
	39.8333	667	771	720	1808	2160	1762	4182	3406	2747	12291	10988	11493	15381	16487	15957	8057	7674	8080
	40	690	785	730	1844	2204	1796	4244	3482	2844	12399	11079	11579	15426	16491	15981	8076	7689	8122
	40.1667	710	794	756	1875	2244	1842	4290	3531	2899	12458	11201	11594	15497	16449	15972	8075	7711	8138
	40.3333	722	808	766	1914	2290	1872	4329	3598	3069	12549	11314	11645	15530	16517	16044	8060	7724	8132
	40.5	734	827	786	1957	2323	1892	4400	3668	3191	12553	11466	11721	15541	16503	16067	8074	7738	8161
	40.6667	754	840	798	2002	2366	1941	4466	3700	3322	12649	11528	11823	15482	16583	16113	8105	7718	8177
	40.8333	777	861	817	2051	2398	1976	4515	3771	3427	12695	11626	11857	15526	16572	16076	8100	7738	8202
	41	791	874	836	2075	2443	2009	4555	3830	3551	12738	11729	11915	15549	16576	16116	8099	7740	8196
	41.1667	802	897	861	2123	2484	2050	4626	3892	3620	12804	11888	11959	15623	16623	16144	8099	7756	8219
	41.3333	821	910	878	2172	2534	2074	4676	3956	3672	12907	11963	12006	15559	16560	16191	8110	7758	8227
	41.5	841	923	902	2220	2567	2119	4721	4036	3768	12939	12044	12088	15568	16613	16231	8138	7756	8230
	41.6667	861	938	908	2261	2609	2162	4771	4120	3838	13021	12157	12136	15652	16619	16212	8149	7776	8315
	41.8333	884	956	933	2327	2652	2206	4834	4170	3917	13065	12224	12223	15609	16634	16194	8159	7807	8291
	42	902	975	949	2350	2693	2227	4873	4256	3996	13107	12316	12310	15641	16652	16244	8178	7810	8273
	42.1667	922	998	971	2413	2745	2277	4934	4317	4071	13159	12402	12334	15651	16682	16257	8146	7769	8283
	42.3333	941	1013	988	2444	2778	2297	5001	4403	4145	13228	12497	12415	15702	16683	16284	8177	7826	8328
	42.5	965	1025	1010	2505	2832	2336	5025	4494	4198	13244	12564	12494	15713	16735	16382	8178	7803	8338
	42.6667	989	1048	1036	2558	2884	2360	5113	4556	4270	13301	12693	12549	15671	16784	16355	8203	7799	8349
	42.8333	1005	1067	1052	2597	2913	2399	5149	4650	4316	13323	12678	12588	15720	16723	16341	8208	7802	8323
	43	1024	1079	1076	2642	2962	2428	5205	4747	4403	13369	12801	12679	15700	16742	16395	8233	7827	8376
	43.1667	1056	1102	1096	2700	2998	2465	5279	4826	4446	13386	12848	12742	15696	16792	16382	8219	7850	8388
	43.3333	1079	1119	1114	2747	3047	2476	5326	4912	4563	13433	12890	12792	15724	16773	16404	8245	7816	8411
	43.5	1103	1131	1146	2811	3098	2515	5401	5028	4643	13444	12979	12846	15739	16757	16396	8257	7815	8400
	43.6667	1123	1152	1166	2850	3132	2539	5452	5137	4809	13515	13046	12883	15767	16837	16463	8248	7845	8433
	43.8333	1147	1172	1196	2903	3173	2569	5493	5229	4902	13510	13050	12939	15775	16793	16467	8268	7843	8455
	44	1181	1197	1207	2955	3227	2617	5573	5328	5012	13547	13173	13037	15765	16854	16450	8241	7846	8456
	44.1667	1200	1213	1237	2995	3274	2656	5628	5412	5108	13594	13238	13105	15774	16814	16487	8247	7852	8464
	44.3333	1225	1227	1260	3050	3318	2697	5693	5507	5216	13672	13268	13078	15779	16813	16503	8292	7887	8444
	44.5	1249	1244	1280	3104	3346	2712	5742	5626	5325	13649	13301	13160	15768	16831	16541	8247	7894	8490
	44.6667	1277	1274	1302	3149	3400	2745	5798	5737	5516	13730	13344	13215	15777	16804	16555	8276	7893	8497
	44.8333	1314	1286	1329	3207	3439	2758	5861	5824	5550	13769	13412	13300	15846	16864	16603	8318	7870	8540
	45	1334	1310	1348	3237	3487	2804	5907	5940	5600	13832	13439	13303	15835	16913	16585	8265	7890	8523
	45.1667	1364	1329	1373	3303	3546	2838	5975	6025	5662	13829	13526	13384	15873	16928	16645	8274	7902	8539
	45.3333	1393	1349	1402	3349	3596	2880	6002	6134	5723	13809	13590	13477	15862	16934	16647	8292	7910	8555
	45.5	1417	1366	1432	3407	3628	2908	6074	6268	5759	13871	13627	13543	15856	16980	16650	8305	7894	8555
	45.6667	1444	1390	1456	3467	3686	2948	6154	6357	5777	13921	13665	13594	15832	16988	16686	8331	7929	8541
	45.8333	1473	1402	1478	3504	3706	2984	6207	6443	5805	14008	13715	13600	15965	16978	16708	8334	7936	8596
	46	1504	1425	1502	3550	3778	3025	6264	6570	5867	14038	13733	13699	15919	16984	16715	8321	7937	8578
	46.1667	1538	1451	1538	3589	3824	3078	6312	6643	5912	14016	13781	13734	15892	16988	16730	8318	7951	8605
	46.3333	1572	1473	1555	3644	3864	3092	6374	6743	5958	14061	13801	13822	15944	17078	16762	8333	7946	8605
	46.5	1608	1497	1597	3694	3893	3124	6453	6864	6003	14143	13869	13818	15951	17087	16801	8356	7948	8638
	46.6667	1645	1506	1609	3756	3958	3159	6506	6987	6050	14130	13943	13909	15895	17085	16799	8388	7950	8625
	46.8333	1669	1530	1634	3782	3982	3205	6572	7045	6073	14191	13969	13952	15943	17095	16794	8383	7926	8611
	47	1708	1552	1659	3823	4024	3263	6628	7172	6153	14214	13977	13995	15972	17039	16736	8360	7966	8639
	47.1667	1745	1574	1693	3889	4059	3300	6701	7256	6171	14167	14010	14035	16044	17100	16846	8367	7956	8644
	47.3333	1774	1592	1712	3942	4121	3338	6776	7365	6235	14264	14048	14123	16067	17089	16808	8388	7963	8677
	47.5	1806	1624	1743	3988	4161	3386	6816	7489	6278	14249	14086	14152	16113	17060	16836	8417	7962	8662
	47.6667	1846	1648	1766	4026	4190	3418	6895	7532	6325	14283	14168	14194	16076	17050	16850	8416	8007	8655
	47.8333	1881	1676	1798	4052	4253	3482	6963	7661	6377	14325	14144	14228	16116	17113	16813	8425	7955	8672
	48	1915	1698	1817	4132	4297	3525	7026	7743	6418	14336	14138	14248	16144	17115	16833	8391	7998	8691
	48.1667	1951	1713	1860	4176	4332	3572	7106	7865	6479	14352	14210	14303	16191	17122	16849	8433	7989	8754
	48.3333	1983	1738	1888	4213	4391	3619	7165	7946	6530	14354	14199	14318	16231	17149	16863	8405	7998	8733
	48.5	2024	1759	1905	4257	4422	3678	7231	8020	6585	14428	14238	14388	16212	17145	16883	8441	8002	8767
	48.6667	2073	1782	1949	4326	4462	3695	7282	8117	6633	14415	14263	14397	16194	17141	16854	8443	8039	8780
	48.8333	2105	1800	1970	4376	4539	3790	7362	8174	6684	14446	14294	14429	16244	17142	16861	8471	8041	8761
	49	2148	1832	1998	4418	4549	3861	7429	8243	6730	14483	14301	14481	16257	17211	16878	8463	8006	8788
	49.1667	2183	1853	2030	4472	4572	3968	7459	8303	6737	14457	14338	14442	16284	17150	16879	8429	8056	8784
	49.3333	2226	1867	2077	4511	4628	4078	7491	8359	6804	14489	14328	14482	16382	17208	16894	8466	8071	8762
	49.5	2273	1881	2102	4561	4679	4159	7568	8415	6861	14566	14407	14537	16355	17167	16891	8497	8043	8754
	49.6667	2309	1911	2118	4597	4717	4243	7583	8453	6889	14565	14355	14557	16341	17149	16860	8477	8036	8824
	49.8333	2349	1935	2140	4639	4781	4316	7642	8540	6973	14554	14387	14533	16395	17171	16871	8501	8068	8805
	50	2396	1956	2199	4686	4789	4378	7691	8587	7016	14603	14394	14621	16382	17169	16892	8507	8054	8806
	50.1667	2435	1985	2215	4730	4859	4436	7706	8672	7069	14656	14413	14648	16404	17238	16939	8498	8045	8815
	50.3333	2473	2014	2249	4768	4905	4491	7766	8748	7088	14637	14484	14649	16396	17228	16939	8502	8069	8838
	50.5	2528	2030	2259	4815	4952	4571	7796	8795	7148	14666	14492	14668	16463	17217	16934	8516	8112	8835
	50.6667	2567	2058	2321	4866	4990	4634	7865	8860	7201	14742	14505	14740	16467	17267	16993	8543	8061	8846
	50.8333	2599	2079	2340	4900	5054	4695	7865	8897	7236	14677	14575	14769	16450	17202	16946	8526	8105	8828
	51	2652	2102	2375	4920	5078	4774	7914	8919	7270	14719	14585	14745	16487	17299	16917	8509	8064	8878
	51.1667	2704	2127	2399	4984	5130	4874	8002	8996	7328	14752	14564	14803	16503	17254	16987	8542	8084	8836
	51.3333	2758	2158	2434	5020	5188	4955	8020	9011	7410	14750	14616	14860	16541	17251	16994	8538	8085	8846
	51.5	2797	2174	2472	5066	5217	5068	8078	9083	7462	14831	14591	14893	16555	17285	16984	8539	8093	8885
	51.6667	2842	2198	2491	5091	5293	5138	8154	9118	7462	14820	14606	14866	16603	17260	17024	8581	8084	8915
	51.8333	2881	2221	2539	5127	5358	5230	8178	9213	7535	14807	14689	14938	16585	17316	17024	8546	8123	8888
	52	2926	2247	2573	5175	5420	5315	8204	9222	7586	14827	14687	14946	16645	17326	16958	8545	8101	8894
	52.1667	2976	2273	2591	5219	5453	5379	8255	9308	7631	14807	14689	14974	16647	17295	16995	8559	8112	8881
	52.3333	3024	2301	2620	5232	5535	5460	8310	9311	7682	14861	14742	14960	16650	17287	17040	8594	8115	8921
	52.5	3076	2313	2651	5277	5593	5498	8324	9356	7693	14876	14702	14967	16686	17331	17031	8553	8135	8882
	52.6667	3124	2340	2699	5285	5629	5530	8388	9398	7758	14854	14725	15015	16708	17330	17072	8592	8156	8893
	52.8333	3175	2364	2730	5323	5664	5564	8405	9417	7792	14898	14771	15038	16715	17390	17035	8605	8142	8935
	53	3221	2381	2764	5367	5687	5601	8442	9490	7835	14896	14816	15050	16730	17386	17000	8587	8130	8946
	53.1667	3287	2409	2795	5398	5737	5645	8535	9506	7869	14964	14849	15035	16762	17330	17067	8607	8140	8932
	53.3333	3316	2443	2823	5433	5824	5655	8554	9544	7913	14944	14827	15086	16801	17414	17049	8594	8172	8950
	53.5	3360	2454	2856	5466	5857	5668	8576	9605	7925	14990	14804	15106	16799	17299	17009	8614	8163	8966
	53.6667	3415	2479	2896	5490	5904	5685	8586	9663	8024	15002	14809	15176	16794	17373	17099	8589	8185	8992
	53.8333	3465	2521	2922	5501	5913	5693	8636	9662	8083	15035	14879	15129	16736	17332	17072	8607	8160	8986
	54	3514	2536	2962	5561	5985	5715	8686	9706	8149	14989	14827	15129	16846	17360	17048	8610	8148	9000
	54.1667	3576	2559	2992	5580	6022	5741	8702	9698	8163	14988	14906	15140	16808	17311	17042	8632	8182	8995
	54.3333	3611	2583	3011	5584	6064	5735	8752	9768	8252	15075	14871	15164	16836	17414	16997	8642	8158	9021
	54.5	3651	2603	3059	5676	6122	5781	8789	9827	8267	15078	14864	15239	16850	17379	17129	8643	8206	8993
	54.6667	3705	2631	3099	5672	6172	5834	8864	9832	8364	15073	14896	15268	16813	17377	17015	8662	8188	9037
	54.8333	3749	2653	3131	5743	6207	5878	8887	9880	8383	15116	14953	15255	16833	17353	17084	8642	8158	9027
	55	3789	2691	3147	5733	6227	5966	8915	9931	8440	15091	14915	15293	16849	17420	17052	8659	8187	9036
	55.1667	3839	2714	3179	5788	6302	6072	8979	9929	8490	15050	14914	15347	16863	17370	17086	8659	8187	9039
	55.3333	3890	2727	3218	5828	6319	6163	9001	9963	8507	15100	14921	15342	16883	17310	17058	8667	8189	9054
	55.5	3920	2746	3252	5858	6404	6236	9071	9987	8593	15190	14959	15289	16854	17384	17107	8648	8194	9031
	55.6667	3994	2769	3285	5910	6418	6320	9105	10042	8640	15107	15012	15389	16861	17377	17102	8671	8174	9046
	55.8333	4015	2807	3326	5909	6481	6386	9099	10039	8675	15102	14944	15389	16878	17417	17114	8675	8241	9027
	56	4062	2817	3352	5975	6522	6386	9131	10086	8760	15189	14990	15417	16879	17418	17071	8699	8234	9024
	56.1667	4116	2848	3383	5977	6564	6511	9209	10148	8838	15147	14957	15367	16894	17407	17053	8687	8211	9071
	56.3333	4155	2874	3405	6029	6603	6585	9219	10142	8840	15199	15000	15404	16891	17361	17106	8686	8216	9053
	56.5	4169	2901	3435	6057	6615	6682	9285	10139	8959	15147	15072	15432	16860	17369	16998	8697	8231	9048
	56.6667	4220	2930	3469	6067	6663	6706	9328	10195	8960	15147	14971	15489	16871	17292	17024	8669	8210	9064
	56.8333	4243	2951	3496	6106	6694	6716	9381	10252	9023	15178	15047	15469	16892	17383	17096	8678	8241	9083
	57	4297	2974	3527	6124	6695	6741	9427	10239	9087	15190	15023	15489	16939	17400	17140	8716	8214	9104
	57.1667	4340	2988	3557	6162	6705	6811	9496	10361	9082	15252	15050	15522	16939	17355	17063	8662	8233	9071
	57.3333	4379	3013	3604	6214	6771	6886	9571	10303	9204	15268	15045	15521	16934	17420	17055	8706	8276	9097
	57.5	4412	3037	3622	6262	6789	6913	9596	10350	9230	15295	15087	15504	16993	17417	17129	8724	8235	9077
	57.6667	4457	3061	3666	6227	6797	7003	9606	10388	9283	15266	15076	15471	16946	17398	17163	8733	8260	9080
	57.8333	4476	3104	3702	6281	6850	7058	9663	10403	9314	15282	15077	15479	16917	17434	17150	8686	8252	9124
	58	4527	3123	3736	6290	6900	7082	9717	10437	9352	15286	15073	15625	16987	17430	17131	8730	8242	9103
	58.1667	4552	3133	3759	6314	6902	7116	9761	10476	9403	15277	15090	15553	16994	17438	17106	8703	8241	9096
	58.3333	4573	3160	3817	6341	6952	7141	9787	10535	9464	15314	15107	15546	16984	17423	17136	8730	8262	9137
	58.5	4601	3188	3850	6352	6981	7173	9872	10529	9499	15267	15119	15604	17024	17365	17166	8708	8288	9105
	58.6667	4630	3214	3866	6357	6999	7192	9944	10552	9509	15358	15120	15605	17024	17426	17119	8737	8222	9129
	58.8333	4660	3236	3918	6383	7061	7213	9959	10584	9561	15408	15129	15658	16958	17357	17197	8747	8278	9135
	59	4717	3252	3939	6440	7085	7244	10038	10585	9618	15325	15171	15582	16995	17487	17147	8748	8275	9164
	59.1667	4730	3289	3977	6445	7061	7250	10014	10629	9655	15391	15172	15670	17040	17440	17154	8738	8262	9163
	59.3333	4767	3296	4008	6462	7115	7289	10092	10651	9689	15290	15099	15588	17031	17359	17128	8772	8246	9149
	59.5	4759	3332	4042	6474	7126	7301	10113	10660	9737	15278	15110	15671	17072	17328	17167	8757	8255	9161
	59.6667	4797	3344	4052	6501	7151	7344	10123	10649	9833	15371	15179	15667	17035	17443	17130	8764	8267	9164
	59.8333	4820	3374	4107	6513	7187	7398	10152	10736	9885	15375	15221	15675	17000	17450	17115	8744	8307	9137
	60	4838	3383	4151	6554	7196	7428	10228	10703	9897	15344	15173	15655	17067	17373	17150	8766	8279	9183
	60.1667	4865	3409	4163	6565	7201	7454	10258	10768	9970	15381	15217	15713	17049	17398	17140	8752	8275	9172
	60.3333	4868	3432	4199	6573	7237	7494	10273	10786	10001	15373	15248	15660	17009	17376	17150	8750	8305	9177
	60.5	4896	3441	4228	6555	7254	7524	10303	10823	10080	15393	15220	15712	17099	17371	17145	8780	8273	9195
	60.6667	4903	3464	4264	6604	7258	7574	10381	10835	10126	15383	15268	15712	17072	17475	17165	8765	8314	9173
	60.8333	4923	3484	4282	6643	7238	7612	10386	10825	10140	15448	15275	15782	17048	17439	17115	8771	8311	9226
	61	4949	3504	4328	6659	7291	7622	10457	10916	10200	15461	15205	15737	17042	17409	17185	8762	8289	9203
	61.1667	4970	3534	4357	6689	7276	7631	10433	10939	10257	15427	15283	15800	16997	17449	17177	8791	8326	9229
	61.3333	4999	3561	4401	6646	7301	7619	10514	10921	10307	15407	15287	15791	17129	17459	17185	8762	8318	9225
	61.5	5024	3568	4415	6687	7308	7640	10522	10952	10286	15474	15277	15765	17015	17428	17151	8769	8290	9214
	61.6667	5029	3588	4434	6684	7319	7648	10573	11015	10366	15456	15329	15803	17084	17460	17236	8801	8309	9210
	61.8333	5043	3605	4456	6694	7358	7663	10593	10999	10403	15447	15273	15743	17052	17428	17173	8790	8322	9226
	62	5065	3631	4491	6703	7338	7656	10568	10990	10360	15444	15297	15827	17086	17412	17148	8788	8315	9206
	62.1667	5075	3654	4508	6736	7335	7663	10593	11045	10442	15461	15332	15800	17058	17505	17195	8826	8296	9232
	62.3333	5095	3675	4541	6734	7366	7684	10624	11073	10475	15494	15351	15822	17107	17490	17176	8800	8324	9191
	62.5	5132	3689	4561	6751	7376	7659	10610	11086	10495	15480	15374	15811	17102	17447	17199	8774	8323	9234
	62.6667	5142	3715	4586	6739	7361	7671	10684	11109	10510	15530	15341	15813	17114	17492	17201	8799	8311	9282
	62.8333	5163	3742	4617	6747	7362	7686	10686	11115	10523	15520	15359	15820	17071	17420	17201	8822	8366	9267
	63	5184	3756	4621	6769	7401	7679	10688	11137	10594	15495	15366	15797	17053	17422	17265	8820	8356	9276
	63.1667	5195	3766	4639	6781	7438	7702	10720	11152	10592	15537	15377	15839	17106	17479	17244	8854	8341	9218
	63.3333	5208	3799	4654	6814	7449	7701	10733	11186	10634	15559	15454	15783	16998	17436	17206	8851	8341	9291
	63.5	5232	3803	4680	6837	7445	7733	10764	11203	10652	15509	15377	15890	17024	17490	17207	8819	8360	9277
	63.6667	5265	3822	4699	6836	7472	7706	10748	11217	10692	15556	15428	15862	17096	17442	17281	8865	8355	9289
	63.8333	5269	3849	4715	6874	7498	7729	10787	11231	10741	15619	15400	15839	17140	17492	17252	8870	8344	9291
	64	5301	3868	4720	6844	7501	7754	10790	11252	10741	15545	15422	15913	17063	17402	17186	8860	8335	9294
	64.1667	5296	3864	4731	6846	7508	7739	10814	11253	10732	15556	15440	15899	17055	17462	17231	8862	8375	9307
	64.3333	5337	3887	4757	6891	7512	7724	10817	11319	10812	15566	15401	15873	17129	17469	17198	8883	8370	9302
	64.5	5322	3918	4770	6884	7550	7724	10862	11317	10792	15563	15403	15961	17163	17515	17240	8881	8381	9295
	64.6667	5348	3932	4787	6925	7526	7742	10900	11326	10877	15654	15405	15924	17150	17576	17254	8841	8393	9310
	64.8333	5346	3940	4820	6934	7580	7778	10869	11363	10892	15606	15451	15932	17131	17527	17286	8870	8391	9344
	65	5388	3981	4828	6936	7559	7715	10924	11385	10934	15614	15418	15928	17106	17513	17323	8844	8389	9311
	65.1667	5398	3984	4841	6941	7559	7756	10908	11404	10957	15574	15406	15916	17136	17556	17282	8856	8390	9308
	65.3333	5421	3995	4844	6962	7573	7746	10898	11392	10978	15639	15451	15901	17166	17521	17298	8883	8404	9332
	65.5	5422	4021	4871	6973	7597	7783	10959	11413	10975	15670	15470	15981	17119	17505	17295	8882	8410	9365
	65.6667	5433	4042	4892	6982	7629	7771	10952	11422	10974	15647	15452	15916	17197	17544	17292	8888	8430	9324
	65.8333	5456	4066	4908	7001	7606	7759	10983	11456	11035	15647	15416	15949	17147	17517	17300	8873	8417	9348
	66	5480	4083	4891	7020	7640	7774	10997	11437	11030	15603	15509	15930	17154	17568	17291	8871	8412	9348
	66.1667	5471	4098	4922	7017	7679	7772	10965	11429	11061	15690	15495	15965	17128	17496	17361	8899	8408	9325
	66.3333	5488	4117	4939	7008	7641	7744	10964	11470	11069	15652	15450	15902	17167	17465	17341	8907	8399	9361
	66.5	5500	4131	4948	6989	7655	7772	11025	11449	11139	15672	15465	15952	17130	17574	17323	8916	8387	9320
	66.6667	5508	4156	4953	7039	7644	7750	11038	11497	11171	15641	15427	15960	17115	17597	17350	8948	8438	9365
	66.8333	5553	4155	4963	7011	7655	7780	10996	11486	11112	15704	15483	15972	17150	17569	17330	8879	8415	9368
	67	5554	4176	4969	7047	7644	7767	10989	11545	11194	15642	15467	15962	17140	17537	17338	8903	8406	9384
	67.1667	5557	4195	4995	7055	7670	7765	11031	11482	11232	15692	15463	16045	17150	17593	17369	8906	8437	9394
	67.3333	5563	4214	5004	7076	7682	7747	11080	11510	11225	15722	15539	16036	17145	17548	17336	8949	8456	9369
	67.5	5560	4226	5012	7089	7699	7803	11087	11511	11243	15669	15517	16015	17165	17526	17364	8934	8447	9357
	67.6667	5584	4260	5021	7072	7722	7791	11056	11533	11251	15700	15502	15952	17115	17613	17374	8950	8428	9391
	67.8333	5593	4256	5028	7112	7711	7823	11073	11611	11286	15730	15480	16017	17185	17549	17290	8957	8474	9424
	68	5599	4264	5030	7095	7766	7787	11062	11565	11315	15661	15533	16001	17177	17487	17340	8966	8464	9404
	68.1667	5614	4290	5037	7129	7754	7833	11106	11547	11328	15701	15497	16001	17185	17527	17344	8979	8463	9390
	68.3333	5640	4323	5054	7150	7759	7798	11159	11604	11346	15765	15564	15992	17151	17570	17347	8982	8478	9411
	68.5	5627	4327	5078	7184	7766	7851	11163	11615	11352	15785	15507	15967	17236	17532	17373	8933	8471	9434
	68.6667	5637	4343	5074	7159	7766	7835	11143	11621	11380	15739	15498	16007	17173	17574	17325	8956	8439	9438
	68.8333	5660	4343	5076	7135	7795	7830	11126	11611	11412	15801	15494	16015	17148	17567	17342	8966	8473	9427
	69	5676	4367	5072	7171	7779	7828	11164	11644	11427	15800	15521	16003	17195	17573	17363	8970	8497	9415
	69.1667	5683	4373	5089	7210	7793	7838	11150	11611	11445	15748	15499	16035	17176	17501	17379	8993	8502	9445
	69.3333	5688	4386	5089	7188	7820	7800	11210	11714	11420	15758	15535	16023	17199	17524	17342	8979	8491	9457
	69.5	5687	4410	5135	7193	7860	7849	11143	11695	11436	15800	15540	16001	17201	17572	17415	9012	8495	9430
	69.6667	5694	4413	5137	7223	7842	7837	11186	11691	11492	15741	15535	15997	17201	17585	17407	8990	8513	9453
	69.8333	5684	4428	5144	7177	7860	7857	11225	11707	11504	15781	15536	15982	17265	17600	17398	8983	8443	9434
	70	5703	4439	5161	7202	7867	7820	11187	11665	11466	15834	15538	15966	17244	17553	17468	8993	8499	9444
	70.1667	5699	4463	5174	7218	7863	7871	11196	11685	11497	15780	15501	15983	17206	17545	17447	8981	8511	9457
	70.3333	5741	4462	5165	7253	7891	7846	11199	11757	11517	15764	15536	15997	17207	17614	17356	9028	8475	9487
	70.5	5738	4468	5180	7248	7878	7862	11230	11745	11548	15765	15573	16004	17281	17548	17338	9046	8518	9481
	70.6667	5742	4505	5180	7258	7866	7833	11246	11759	11558	15808	15542	16053	17252	17616	17403	9017	8546	9483
	70.8333	5743	4493	5181	7256	7909	7843	11253	11784	11566	15834	15504	16011	17186	17561	17416	9015	8522	9489
	71	5774	4512	5189	7280	7905	7869	11253	11776	11595	15748	15543	16043	17231	17628	17402	9012	8516	9496
	71.1667	5770	4515	5222	7269	7918	7838	11243	11798	11582	15837	15561	16063	17198	17590	17422	9054	8532	9529
	71.3333	5782	4540	5207	7258	7893	7841	11250	11784	11616	15787	15550	15985	17240	17539	17366	9027	8540	9512
	71.5	5803	4542	5221	7295	7941	7877	11264	11785	11637	15790	15550	16048	17254	17538	17424	9045	8534	9490
	71.6667	5786	4560	5214	7281	7896	7891	11264	11761	11631	15778	15585	16061	17286	17531	17508	9041	8532	9516
	71.8333	5789	4587	5243	7289	7920	7874	11305	11772	11673	15741	15561	16071	17323	17615	17391	9048	8528	9509
	72	5797	4578	5247	7292	7966	7863	11231	11805	11686	15803	15569	16004	17282	17555	17419	9054	8538	9515
	72.1667	5789	4589	5248	7271	7964	7874	11254	11860	11679	15809	15584	16038	17298	17605	17369	9043	8527	9510
	72.3333	5790	4586	5256	7294	7967	7868	11285	11808	11656	15816	15577	16081	17295	17563	17396	9070	8570	9527
	72.5	5812	4609	5277	7313	7961	7874	11315	11827	11713	15802	15590	16068	17292	17641	17486	9077	8541	9549
	72.6667	5836	4616	5274	7315	7993	7879	11326	11844	11695	15798	15603	16050	17300	17577	17478	9037	8572	9544
	72.8333	5816	4617	5259	7301	8003	7862	11337	11827	11760	15832	15609	16050	17291	17619	17415	9070	8545	9534
	73	5837	4632	5286	7347	7986	7868	11310	11854	11714	15898	15510	16054	17361	17617	17444	9091	8553	9580
	73.1667	5842	4652	5279	7336	7998	7888	11340	11883	11775	15844	15628	16064	17341	17676	17466	9055	8550	9528
	73.3333	5849	4649	5289	7346	8019	7894	11358	11919	11782	15806	15595	16128	17323	17621	17439	9048	8557	9560
	73.5	5844	4664	5299	7349	8039	7861	11396	11907	11805	15872	15588	15984	17350	17678	17503	9097	8586	9539
	73.6667	5873	4664	5325	7368	8061	7916	11314	11890	11743	15859	15607	16087	17330	17641	17466	9057	8560	9562
	73.8333	5876	4665	5316	7434	8083	7940	11322	11866	11826	15828	15616	16015	17338	17610	17478	9102	8588	9552
	74	5871	4670	5326	7406	8051	7955	11332	11919	11864	15844	15576	16021	17369	17603	17492	9077	8582	9579
	74.1667	5863	4686	5322	7386	8059	7926	11343	11889	11824	15899	15595	16109	17336	17586	17459	9093	8587	9559
	74.3333	5880	4695	5339	7391	8057	7936	11349	11941	11848	15850	15587	16075	17364	17608	17449	9087	8566	9601
	74.5	5870	4701	5363	7398	8047	7925	11356	11900	11823	15844	15531	16090	17374	17578	17410	9073	8571	9563
	74.6667	5894	4688	5330	7405	8044	7926	11355	11894	11836	15888	15574	16062	17290	17645	17467	9066	8577	9580
	74.8333	5879	4698	5351	7412	8065	7928	11369	11848	11852	15797	15503	16019	17340	17572	17394	9085	8578	9595
	75	5902	4706	5363	7419	8064	7927	11400	11931	11875	15882	15566	16124	17344	17639	17500	9067	8582	9557
	75.1667	5906	4726	5351	7423	8071	7896	11393	11915	11904	15833	15552	16058	17347	17573	17510	9069	8556	9561
	75.3333	5883	4734	5381	7409	8043	7883	11449	11920	11873	15874	15580	16096	17373	17542	17415	9128	8581	9613
	75.5	5913	4740	5378	7406	8031	7912	11396	11972	11937	15868	15639	16113	17325	17636	17496	9121	8598	9589
	75.6667	5907	4753	5374	7440	8067	7887	11460	11942	11957	15823	15599	16109	17342	17619	17554	9103	8603	9581
	75.8333	5920	4768	5390	7414	8091	7923	11418	11980	11915	15905	15606	16105	17363	17604	17466	9114	8623	9589
	76	5940	4759	5392	7423	8072	7922	11431	11980	11940	15913	15626	16114	17379	17728	17504	9117	8585	9620
	76.1667	5912	4759	5409	7428	8080	7920	11405	11992	11976	15874	15653	16068	17342	17658	17514	9126	8593	9625
	76.3333	5950	4780	5412	7421	8078	7897	11442	12022	11971	15851	15604	16129	17415	17717	17532	9104	8606	9631
	76.5	5920	4778	5408	7440	8070	7874	11448	11967	11957	15882	15561	16059	17407	17621	17504	9105	8646	9614
	76.6667	5965	4774	5396	7414	8085	7942	11444	12021	11961	15850	15640	16102	17398	17581	17489	9127	8593	9640
	76.8333	5944	4815	5414	7452	8097	7921	11442	12005	11975	15930	15599	16153	17468	17696	17546	9160	8603	9652
	77	5956	4793	5433	7451	8081	7907	11443	12006	11966	15868	15648	16132	17447	17603	17555	9152	8614	9610
	77.1667	5968	4818	5442	7417	8100	7943	11456	12050	11996	15916	15619	16155	17356	17658	17508	9150	8592	9652
	77.3333	5967	4800	5453	7426	8086	7873	11519	12045	12030	15913	15615	16155	17338	17660	17589	9128	8643	9621
	77.5	5964	4806	5422	7412	8106	7904	11443	12032	12026	15917	15545	16102	17403	17629	17517	9110	8638	9647
	77.6667	5972	4827	5442	7441	8114	7934	11488	12022	12055	15941	15591	16162	17416	17605	17501	9129	8640	9628
	77.8333	5965	4830	5448	7437	8121	7866	11486	12053	12060	15913	15622	16096	17402	17744	17578	9149	8596	9624
	78	5990	4827	5463	7427	8098	7913	11472	12059	12036	15936	15648	16178	17422	17710	17510	9145	8641	9651
	78.1667	5988	4837	5453	7466	8127	7906	11468	12073	12067	15901	15597	16119	17366	17623	17545	9151	8638	9647
	78.3333	5999	4836	5450	7475	8120	7872	11456	12051	12073	15948	15627	16134	17424	17673	17570	9170	8662	9638
	78.5	5992	4840	5458	7476	8141	7903	11486	12084	12084	15918	15631	16154	17508	17664	17524	9150	8649	9645
	78.6667	5992	4854	5480	7479	8145	7943	11478	12065	12075	15929	15655	16168	17391	17649	17534	9154	8617	9665
	78.8333	6028	4863	5456	7493	8148	7927	11522	12063	12087	15909	15710	16164	17419	17697	17546	9178	8621	9671
	79	5996	4849	5471	7472	8167	7918	11472	12087	12041	15955	15626	16126	17369	17716	17554	9160	8634	9652
	79.1667	5989	4856	5464	7489	8116	7917	11496	12066	12084	15958	15642	16138	17396	17709	17611	9140	8628	9669
	79.3333	6013	4870	5476	7475	8162	7916	11445	12061	12082	15923	15611	16111	17486	17634	17535	9171	8639	9642
	79.5	6005	4875	5480	7488	8127	7901	11462	11987	12060	15878	15588	16165	17478	17629	17466	9169	8639	9627
	79.6667	6015	4888	5471	7482	8137	7911	11486	12058	12095	15962	15612	16181	17415	17681	17507	9132	8659	9663
	79.8333	6015	4867	5479	7494	8168	7919	11498	12095	12116	15920	15638	16154	17444	17705	17589	9191	8639	9645
	80	5983	4889	5468	7482	8132	7902	11457	12110	12128	15917	15620	16170	17466	17707	17500	9171	8661	9700
	80.1667	6036	4895	5478	7472	8154	7889	11458	12087	12109	15896	15627	16079	17439	17596	17497	9174	8625	9647
	80.3333	6026	4875	5493	7464	8142	7880	11482	12050	12128	15904	15613	16138	17503	17604	17505	9188	8648	9648
	80.5	6057	4898	5493	7476	8108	7907	11467	12053	12071	15954	15619	16057	17466	17616	17494	9158	8653	9628
	80.6667	6043	4924	5497	7491	8161	7892	11484	12094	12102	15930	15699	16100	17478	17633	17512	9168	8638	9653
	80.8333	6039	4880	5510	7511	8155	7916	11514	12102	12102	15885	15613	16207	17492	17590	17531	9178	8648	9667
	81	6030	4885	5471	7481	8152	7912	11478	12071	12138	15903	15534	16136	17459	17656	17559	9167	8653	9670
	81.1667	6013	4917	5501	7503	8135	7902	11508	12049	12165	15915	15643	16126	17449	17593	17464	9156	8648	9689
	81.3333	6063	4905	5510	7508	8150	7885	11519	12121	12164	15922	15651	16109	17410	17594	17535	9193	8647	9647
	81.5	6045	4929	5511	7504	8192	7926	11471	12168	12189	15967	15632	16143	17467	17699	17494	9147	8669	9683
	81.6667	6030	4932	5516	7517	8177	7874	11484	12122	12178	15995	15616	16147	17394	17669	17499	9204	8664	9673
	81.8333	6054	4912	5515	7538	8196	7938	11478	12090	12216	15930	15636	16182	17500	17654	17492	9163	8643	9683
	82	6039	4928	5539	7510	8212	7921	11547	12079	12226	15890	15656	16139	17510	17666	17520	9150	8646	9661
	82.1667	6062	4956	5514	7531	8183	7950	11488	12150	12181	15963	15578	16097	17415	17667	17530	9175	8669	9685
	82.3333	6074	4934	5498	7526	8209	7925	11573	12130	12164	16005	15663	16150	17496	17698	17492	9191	8690	9678
	82.5	6055	4933	5537	7555	8195	7914	11489	12110	12189	15944	15628	16127	17554	17661	17548	9173	8632	9679
	82.6667	6045	4965	5540	7527	8202	7893	11505	12144	12256	16001	15636	16166	17466	17626	17464	9174	8641	9674
	82.8333	6047	4933	5535	7483	8191	7901	11494	12137	12257	15978	15593	16121	17504	17650	17552	9199	8661	9691
	83	6057	4959	5526	7529	8166	7908	11501	12115	12225	15911	15552	16122	17514	17651	17487	9178	8655	9683
	83.1667	6033	4972	5534	7554	8183	7900	11533	12142	12244	15957	15663	16170	17532	17649	17540	9187	8664	9679
	83.3333	6059	4949	5554	7478	8180	7909	11506	12143	12237	15974	15672	16128	17504	17614	17543	9244	8666	9691
	83.5	6070	4936	5538	7498	8207	7926	11516	12182	12235	15980	15676	16117	17489	17639	17508	9197	8681	9669
	83.6667	6082	4974	5549	7533	8171	7932	11495	12181	12254	15962	15593	16090	17546	17629	17562	9194	8659	9693
	83.8333	6084	4988	5563	7538	8181	7891	11497	12170	12222	15937	15653	16121	17555	17626	17518	9207	8688	9707
	84	6071	4983	5565	7552	8178	7879	11514	12142	12304	15991	15620	16050	17508	17614	17464	9219	8654	9731
	84.1667	6100	4974	5564	7519	8188	7894	11493	12172	12285	15984	15631	16190	17589	17616	17497	9187	8689	9698
	84.3333	6106	4977	5555	7526	8210	7897	11521	12168	12289	15930	15579	16087	17517	17674	17516	9227	8710	9672
	84.5	6088	4981	5573	7556	8182	7901	11533	12171	12259	16013	15592	16123	17501	17631	17545	9224	8700	9690
	84.6667	6081	4991	5568	7574	8220	7921	11549	12136	12263	15931	15648	16104	17578	17587	17493	9191	8678	9685
	84.8333	6092	5001	5584	7529	8208	7902	11539	12134	12272	15923	15655	16203	17510	17592	17484	9220	8674	9711
	85	6103	5008	5569	7542	8233	7920	11484	12197	12299	15970	15622	16101	17545	17634	17474	9206	8697	9749
	85.1667	6086	4995	5564	7561	8238	7911	11517	12136	12358	15993	15657	16134	17570	17666	17500	9221	8659	9746
	85.3333	6098	4991	5564	7546	8216	7899	11496	12173	12299	15922	15660	16183	17524	17639	17519	9208	8687	9742
	85.5	6126	5002	5562	7556	8236	7907	11498	12213	12340	15989	15622	16130	17534	17620	17513	9217	8700	9741
	85.6667	6093	5025	5588	7540	8275	7932	11510	12189	12317	15963	15675	16198	17546	17633	17546	9245	8667	9730
	85.8333	6109	5021	5564	7575	8261	7942	11517	12234	12366	16006	15629	16141	17554	17710	17545	9235	8703	9741
	86	6138	5043	5592	7600	8262	7957	11583	12177	12327	16027	15607	16179	17611	17688	17528	9262	8696	9743
	86.1667	6130	5025	5579	7600	8267	7944	11523	12203	12336	15968	15631	16160	17535	17633	17550	9271	8732	9741
	86.3333	6124	5036	5626	7592	8259	7928	11565	12224	12339	16026	15598	16209	17466	17594	17523	9239	8710	9725
	86.5	6114	5042	5616	7607	8242	7922	11561	12207	12351	15983	15643	16145	17507	17599	17494	9233	8719	9761
	86.6667	6146	5036	5613	7609	8279	7890	11559	12225	12357	16030	15622	16196	17589	17712	17504	9240	8711	9747
	86.8333	6127	5063	5619	7560	8258	7917	11568	12222	12345	15993	15688	16175	17500	17618	17608	9263	8715	9748
	87	6145	5054	5611	7554	8263	7927	11578	12235	12395	16021	15591	16145	17497	17617	17558	9286	8703	9773
	87.1667	6142	5043	5624	7588	8217	7912	11522	12227	12367	16024	15630	16205	17505	17646	17575	9252	8749	9752
	87.3333	6130	5057	5634	7548	8245	7927	11498	12191	12408	16013	15588	16214	17494	17651	17549	9279	8749	9758
	87.5	6123	5072	5626	7547	8244	7943	11545	12237	12367	15972	15616	16157	17512	17625	17529	9273	8729	9805
	87.6667	6141	5056	5603	7583	8270	7894	11542	12240	12398	16033	15669	16162	17531	17635	17488	9283	8713	9751
	87.8333	6125	5082	5617	7563	8247	7922	11568	12238	12407	16034	15673	16186	17559	17580	17543	9285	8731	9779
	88	6151	5073	5619	7564	8255	7841	11566	12280	12426	15983	15707	16188	17464	17623	17557	9261	8765	9812
	88.1667	6143	5072	5645	7536	8232	7893	11514	12243	12434	16025	15657	16221	17535	17590	17548	9280	8738	9782
	88.3333	6165	5089	5632	7581	8280	7915	11545	12243	12398	16080	15672	16125	17494	17625	17542	9263	8737	9783
	88.5	6146	5111	5641	7605	8281	7935	11527	12265	12419	16024	15634	16211	17499	17614	17607	9305	8725	9800
	88.6667	6166	5089	5645	7591	8289	7915	11547	12253	12435	15986	15627	16170	17492	17669	17562	9290	8746	9807
	88.8333	6147	5086	5631	7616	8281	7927	11553	12297	12414	16010	15630	16197	17520	17683	17543	9282	8749	9820
	89	6149	5108	5654	7624	8280	7936	11576	12234	12419	16033	15676	16166	17530	17676	17566	9276	8774	9833
	89.1667	6161	5104	5657	7620	8305	7932	11564	12236	12472	15992	15653	16216	17492	17617	17653	9279	8766	9806
	89.3333	6149	5105	5657	7604	8294	7960	11579	12218	12439	16011	15655	16207	17548	17632	17555	9305	8756	9828
	89.5	6162	5096	5652	7608	8329	7905	11535	12297	12508	16056	15684	16225	17464	17670	17589	9267	8718	9804
	89.6667	6164	5092	5646	7614	8309	7887	11578	12228	12456	16103	15721	16220	17552	17682	17634	9319	8770	9819
	89.8333	6158	5113	5647	7597	8280	7897	11553	12281	12443	16031	15672	16225	17487	17649	17613	9329	8767	9831
	90	6179	5127	5655	7600	8289	7919	11529	12293	12477	16070	15619	16223	17540	17598	17597	9331	8763	9825
	90.1667	6162	5126	5653	7600	8294	7926	11555	12298	12507	16003	15637	16237	17543	17607	17613	9326	8795	9827
	90.3333	6185	5120	5678	7584	8278	7879	11555	12337	12487	16074	15714	16217	17508	17629	17661	9304	8779	9821
	90.5	6170	5138	5667	7586	8287	7888	11554	12276	12496	16045	15621	16212	17562	17635	17599	9309	8795	9834
	90.6667	6200	5132	5670	7601	8279	7884	11587	12309	12487	16075	15683	16200	17518	17613	17638	9338	8796	9828
	90.8333	6215	5130	5656	7623	8253	7927	11559	12314	12556	16037	15639	16215	17464	17599	17629	9317	8785	9853
	91	6202	5140	5649	7547	8247	7858	11586	12370	12498	16056	15649	16285	17497	17645	17634	9325	8802	9831
	91.1667	6158	5162	5704	7571	8292	7837	11552	12351	12554	16057	15699	16198	17516	17645	17628	9334	8769	9865
	91.3333	6179	5133	5691	7608	8268	7874	11575	12328	12504	16109	15673	16234	17545	17650	17634	9338	8776	9888
	91.5	6190	5152	5701	7590	8276	7903	11561	12293	12494	16118	15671	16241	17493	17664	17647	9324	8796	9881
	91.6667	6180	5160	5682	7599	8254	7883	11601	12341	12572	16091	15738	16208	17484	17625	17569	9367	8782	9883
	91.8333	6223	5161	5682	7599	8263	7888	11545	12363	12547	16186	15664	16277	17474	17619	17607	9378	8794	9885
	92	6217	5170	5680	7586	8248	7876	11577	12351	12549	16105	15700	16255	17500	17637	17650	9336	8826	9855
	92.1667	6207	5166	5701	7605	8273	7855	11567	12354	12560	16063	15719	16248	17519	17592	17653	9373	8803	9895
	92.3333	6222	5153	5697	7573	8282	7862	11623	12361	12528	16144	15641	16255	17513	17613	17628	9372	8829	9909
	92.5	6213	5165	5708	7578	8245	7860	11583	12350	12577	16134	15695	16225	17546	17596	17646	9351	8814	9899
	92.6667	6198	5156	5712	7554	8256	7863	11578	12389	12563	16156	15671	16227	17545	17604	17607	9385	8787	9911
	92.8333	6201	5171	5720	7574	8235	7858	11606	12392	12518	16101	15707	16240	17528	17662	17614	9362	8838	9876
	93	6221	5185	5716	7577	8247	7842	11549	12397	12548	16130	15672	16268	17550	17626	17666	9378	8807	9898
	93.1667	6220	5183	5712	7571	8283	7831	11581	12376	12560	16129	15727	16268	17523	17656	17602	9326	8799	9903
	93.3333	6208	5167	5706	7623	8331	7880	11622	12404	12582	16133	15679	16267	17494	17572	17648	9362	8833	9891
	93.5	6213	5201	5719	7639	8332	7903	11599	12359	12617	16147	15660	16242	17504	17593	17594	9350	8801	9898
	93.6667	6249	5194	5719	7622	8324	7891	11577	12337	12615	16160	15757	16281	17608	17610	17636	9366	8797	9903
	93.8333	6237	5184	5710	7645	8343	7874	11600	12356	12584	16151	15733	16234	17558	17567	17656	9410	8859	9913
	94	6239	5188	5722	7651	8341	7912	11621	12396	12592	16137	15685	16192	17575	17642	17608	9361	8812	9929
	94.1667	6230	5192	5718	7618	8309	7901	11557	12379	12572	16171	15721	16266	17549	17622	17695	9383	8824	9893
	94.3333	6235	5194	5726	7631	8335	7882	11578	12411	12600	16212	15720	16300	17529	17640	17716	9371	8815	9939
	94.5	6230	5207	5718	7622	8261	7839	11605	12427	12640	16134	15704	16314	17488	17629	17687	9381	8831	9897
	94.6667	6223	5182	5695	7602	8297	7835	11633	12394	12627	16124	15705	16279	17543	17619	17630	9370	8858	9898
	94.8333	6223	5183	5719	7616	8325	7894	11620	12381	12647	16164	15758	16252	17557	17604	17671	9394	8817	9906
	95	6205	5187	5719	7626	8316	7866	11609	12437	12679	16195	15688	16328	17548	17643	17637	9377	8841	9933
	95.1667	6214	5221	5717	7632	8317	7874	11624	12423	12665	16168	15727	16309	17542	17642	17673	9367	8824	9899
	95.3333	6214	5184	5711	7657	8334	7871	11632	12437	12658	16208	15745	16254	17607	17653	17715	9378	8824	9914
	95.5	6218	5189	5733	7647	8333	7864	11598	12416	12635	16157	15728	16331	17562	17643	17712	9368	8819	9904
	95.6667	6229	5213	5740	7620	8314	7875	11631	12480	12663	16195	15714	16290	17543	17636	17723	9370	8835	9882
	95.8333	6204	5199	5710	7638	8329	7865	11608	12457	12660	16165	15776	16287	17566	17700	17632	9395	8836	9937
	96	6233	5209	5717	7638	8325	7865	11602	12463	12686	16145	15702	16322	17653	17652	17687	9398	8854	9913
	96.1667	6239	5215	5711	7645	8331	7866	11661	12447	12700	16247	15712	16273	17555	17604	17704	9376	8829	9919
	96.3333	6231	5216	5728	7594	8304	7871	11637	12466	12682	16196	15716	16331	17589	17666	17734	9393	8852	9890

## Sheet: Fig 1b
PSMα3 kinetics
PSMα3 monomeric concentration in mg/ml
	Time (h)	0.2 mg/ml	0.2 mg/ml	0.2 mg/ml	0.3 mg/ml	0.3 mg/ml	0.4 mg/ml	0.4 mg/ml	0.4 mg/ml	0.6 mg/ml	0.6 mg/ml	0.6 mg/ml	0.8 mg/ml	0.8 mg/ml	0.8 mg/ml	1 mg/ml	1 mg/ml	1 mg/ml
	0	129	130	123	132	132	140	138	141	157	142	131	143	180	151	168	174	163
	0.00555556	138	126	125	127	131	143	142	143	152	137	135	142	177	150	171	173	166
	0.0111111	132	126	123	124	128	145	142	144	155	145	133	144	182	151	170	180	166
	0.0166667	131	128	124	129	131	148	138	148	160	144	137	142	181	151	174	184	167
	0.0222222	136	130	121	127	134	148	138	143	161	144	137	147	179	154	180	188	174
	0.0277778	130	126	120	129	133	148	142	144	160	146	139	147	182	159	186	193	169
	0.0333333	134	127	120	131	131	150	139	148	160	146	137	148	185	160	199	202	177
	0.0388889	135	128	120	132	132	153	136	146	164	150	138	155	191	165	204	214	182
	0.0444444	133	130	118	132	131	150	136	148	168	151	140	160	197	168	215	230	188
	0.05	137	129	119	128	133	149	146	149	170	160	142	166	204	174	234	238	195
	0.0555556	134	125	124	128	134	150	142	150	177	164	148	171	212	180	258	260	208
	0.0611111	136	131	124	132	135	157	147	151	180	174	151	179	224	195	282	292	224
	0.0666667	136	128	125	130	132	156	149	151	192	177	155	194	244	205	324	320	247
	0.0722222	138	129	123	132	132	157	148	153	193	190	163	212	264	229	367	362	279
	0.0777778	134	128	124	132	138	158	158	158	198	200	168	232	290	251	432	416	323
	0.0833333	139	133	124	133	135	170	153	160	215	218	179	260	318	281	507	488	378
	0.0888889	140	134	126	133	135	172	160	164	221	237	194	296	370	316	610	580	453
	0.0944444	140	133	120	137	139	175	165	171	235	261	211	343	429	365	736	695	558
	0.1	145	129	123	136	138	184	177	176	256	290	228	408	507	437	902	843	695
	0.105556	141	131	128	138	141	189	175	180	274	323	253	493	610	517	1096	1012	878
	0.111111	146	130	123	141	146	201	188	186	297	370	287	595	735	624	1340	1222	1120
	0.116667	146	132	125	146	148	206	195	199	324	419	322	724	885	754	1632	1497	1409
	0.122222	143	134	129	145	147	221	208	207	362	478	366	883	1071	906	1963	1807	1786
	0.127778	148	130	123	151	155	235	224	223	409	553	427	1078	1301	1107	2348	2180	2219
	0.133333	152	136	128	154	158	243	248	236	465	645	496	1307	1567	1340	2772	2575	2732
	0.138889	153	138	131	160	166	272	271	250	523	749	585	1578	1867	1611	3229	3053	3286
	0.144444	152	138	132	166	168	286	296	270	597	870	684	1897	2218	1920	3707	3556	3867
	0.15	156	135	134	170	175	313	330	293	682	1000	797	2240	2598	2283	4171	4070	4465
	0.155556	162	136	137	180	183	344	373	317	785	1163	937	2641	2996	2658	4612	4610	5056
	0.161111	163	140	134	192	192	381	423	351	900	1334	1095	3043	3428	3076	5015	5123	5606
	0.166667	166	144	137	198	208	426	481	387	1030	1544	1276	3483	3877	3506	5399	5589	6084
	0.172222	161	147	142	215	217	478	547	429	1182	1766	1490	3929	4314	3940	5693	5991	6471
	0.177778	172	148	139	225	226	536	633	482	1358	2005	1706	4379	4756	4370	6009	6383	6850
	0.183333	172	144	144	240	247	600	724	537	1566	2258	1972	4814	5137	4725	6257	6685	7114
	0.188889	173	153	150	262	265	682	832	594	1773	2530	2225	5176	5520	5105	6422	6974	7371
	0.194444	181	155	153	283	291	761	961	668	2014	2820	2521	5558	5842	5432	6631	7157	7565
	0.2	185	152	160	308	314	859	1096	744	2260	3103	2816	5863	6118	5729	6800	7352	7644
	0.205556	187	161	162	330	338	969	1250	825	2514	3412	3128	6108	6363	5980	6934	7527	7834
	0.211111	191	167	167	365	373	1083	1421	919	2787	3697	3426	6331	6551	6212	7090	7603	7940
	0.216667	196	161	178	397	412	1226	1614	1020	3036	3966	3718	6566	6763	6368	7210	7749	8012
	0.222222	200	174	182	432	456	1363	1813	1134	3311	4239	4016	6764	6957	6565	7354	7866	8121
	0.227778	212	179	184	481	500	1526	2022	1255	3538	4464	4264	6861	7089	6708	7510	7944	8204
	0.233333	211	180	202	526	547	1690	2244	1379	3750	4685	4504	6994	7252	6874	7658	8016	8354
	0.238889	223	185	205	579	606	1862	2452	1501	3954	4825	4709	7130	7406	6946	7826	8048	8466
	0.244444	228	199	220	637	666	2034	2669	1637	4138	5014	4881	7224	7602	7078	7913	8149	8519
	0.25	232	203	226	697	729	2224	2873	1775	4268	5190	5036	7340	7848	7159	8113	8187	8588
	0.255556	241	204	240	761	797	2388	3079	1916	4426	5304	5173	7464	8100	7259	8276	8260	8646
	0.261111	251	220	260	829	878	2542	3246	2054	4522	5433	5288	7636	8321	7346	8445	8358	8677
	0.266667	256	228	276	900	948	2726	3391	2178	4603	5529	5392	7737	8502	7422	8606	8404	8776
	0.272222	270	237	290	978	1027	2866	3541	2307	4695	5621	5464	7819	8598	7519	8794	8439	8827
	0.277778	282	250	303	1057	1109	3004	3694	2423	4770	5724	5555	7899	8771	7581	8942	8525	8854
	0.283333	286	259	329	1135	1195	3132	3794	2539	4840	5818	5610	8043	8868	7619	9018	8536	8913
	0.288889	298	268	352	1215	1281	3271	3898	2638	4892	5870	5690	8079	8950	7746	9027	8658	8980
	0.294444	312	289	378	1299	1369	3392	3994	2744	4952	5950	5756	8151	9076	7788	9160	8634	9047
	0.3	327	299	404	1365	1446	3467	4083	2830	4986	6040	5869	8275	9169	7842	9223	8715	9123
	0.305556	335	316	429	1444	1528	3572	4180	2913	5020	6150	5934	8377	9278	7870	9242	8721	9161
	0.311111	359	327	463	1517	1602	3657	4264	2984	5077	6260	6011	8462	9389	7996	9301	8757	9232
	0.316667	369	348	488	1579	1691	3734	4294	3040	5114	6359	6083	8606	9485	8109	9373	8796	9254
	0.322222	396	365	516	1642	1755	3810	4361	3112	5178	6431	6208	8698	9556	8125	9409	8825	9334
	0.327778	399	384	539	1712	1828	3891	4416	3173	5286	6557	6368	8857	9638	8261	9466	8926	9436
	0.333333	426	408	556	1773	1874	3959	4462	3224	5330	6595	6502	9041	9778	8274	9543	8989	9544
	0.338889	444	422	599	1822	1939	4044	4556	3287	5329	6667	6619	9144	9858	8354	9638	9082	9630
	0.344444	460	446	620	1873	1997	4067	4567	3323	5341	6722	6778	9287	9902	8404	9594	9149	9697
	0.35	480	456	644	1913	2050	4102	4617	3381	5396	6804	6973	9377	10007	8447	9699	9182	9850
	0.355556	498	476	666	1961	2089	4173	4652	3404	5455	6845	7227	9593	10107	8479	9757	9196	9994
	0.361111	515	497	691	1998	2144	4199	4671	3444	5519	6902	7469	9702	10187	8529	9776	9261	10122
	0.366667	535	515	717	2040	2173	4236	4758	3476	5571	6965	7603	9821	10296	8628	9898	9314	10189
	0.372222	545	531	730	2077	2221	4277	4794	3505	5607	7015	7699	9968	10342	8659	10000	9399	10269
	0.377778	567	548	745	2103	2260	4326	4847	3533	5639	7063	7801	10099	10443	8671	10030	9386	10376
	0.383333	581	565	768	2132	2295	4350	4898	3560	5746	7128	7851	10188	10531	8756	10081	9425	10467
	0.388889	595	579	774	2167	2323	4353	4980	3583	5777	7155	7961	10308	10584	8813	10042	9538	10545
	0.394444	611	602	786	2187	2357	4423	5018	3622	5826	7194	8007	10441	10672	8839	10176	9568	10666
	0.4	626	606	812	2202	2378	4442	5063	3646	5861	7259	8086	10494	10821	8865	10204	9555	10806
	0.405556	645	622	827	2240	2403	4469	5097	3662	5907	7300	8165	10565	10868	8912	10233	9675	10877
	0.411111	654	636	834	2257	2436	4488	5159	3678	5958	7379	8290	10629	10960	9012	10295	9734	11017
	0.416667	676	648	835	2283	2447	4509	5262	3717	6002	7402	8365	10709	11009	8985	10341	9710	11080
	0.422222	686	662	857	2303	2484	4558	5287	3737	5993	7458	8457	10772	11047	9007	10396	9842	11113
	0.427778	699	672	859	2330	2499	4587	5338	3724	6082	7502	8478	10852	11149	9060	10409	9801	11188
	0.433333	706	690	859	2347	2524	4596	5360	3763	6077	7541	8590	10900	11190	9115	10411	9888	11218
	0.438889	722	700	876	2365	2533	4631	5394	3808	6135	7558	8694	10955	11246	9189	10523	9905	11256
	0.444444	736	709	877	2383	2554	4671	5425	3856	6168	7583	8815	11009	11318	9200	10514	9950	11251
	0.45	744	718	884	2396	2569	4738	5466	3882	6189	7620	8881	10995	11338	9242	10564	9964	11349
	0.455556	752	724	893	2434	2599	4752	5466	3894	6202	7646	9024	11048	11328	9282	10586	10041	11324
	0.461111	759	732	903	2450	2628	4796	5521	3916	6297	7680	9109	11118	11406	9305	10645	10065	11400
	0.466667	777	743	905	2458	2643	4851	5539	3927	6318	7717	9180	11179	11415	9327	10634	10098	11442
	0.472222	788	752	909	2467	2661	4973	5559	3946	6312	7755	9237	11213	11431	9392	10750	10134	11507
	0.477778	786	764	915	2491	2679	5046	5588	3981	6372	7792	9325	11232	11436	9398	10755	10210	11562
	0.483333	793	767	919	2527	2704	5108	5627	4056	6377	7843	9394	11227	11449	9414	10800	10263	11558
	0.488889	798	778	940	2551	2718	5122	5641	4071	6495	7875	9489	11290	11504	9510	10828	10268	11516
	0.494444	808	788	926	2561	2735	5159	5682	4110	6442	7916	9547	11368	11479	9528	10893	10206	11622
	0.5	809	790	935	2585	2773	5203	5705	4191	6492	7960	9598	11368	11465	9516	10836	10342	11592
	0.505556	824	788	940	2610	2803	5261	5734	4234	6494	7991	9707	11356	11479	9557	10900	10376	11639
	0.511111	838	798	942	2645	2824	5296	5781	4262	6489	8017	9760	11445	11456	9516	10924	10373	11688
	0.516667	844	807	945	2673	2845	5337	5835	4294	6550	8070	9856	11473	11464	9624	10942	10470	11714
	0.522222	861	800	954	2698	2875	5348	5860	4293	6599	8084	9867	11538	11393	9674	10963	10440	11728
	0.527778	856	822	960	2708	2907	5436	5871	4328	6606	8168	10014	11523	11438	9692	11027	10483	11821
	0.533333	859	818	974	2715	2935	5516	5920	4366	6671	8207	10057	11605	11401	9720	10995	10521	11771
	0.538889	869	834	973	2745	2953	5551	5940	4443	6730	8208	10147	11604	11384	9734	11111	10553	11766
	0.544444	874	835	964	2780	3007	5600	5923	4493	6679	8229	10161	11663	11333	9774	11109	10600	11816
	0.55	885	834	984	2815	3040	5635	5973	4495	6705	8296	10213	11723	11366	9825	11037	10603	11844
	0.555556	901	845	975	2819	3094	5665	6012	4546	6739	8270	10289	11715	11324	9820	11067	10647	11826
	0.561111	906	853	977	2855	3111	5718	6042	4567	6740	8333	10332	11696	11336	9846	11132	10685	11828
	0.566667	901	856	979	2891	3127	5766	6072	4596	6777	8387	10313	11730	11321	9902	11103	10712	11858
	0.572222	909	868	996	2904	3178	5814	6094	4643	6768	8397	10393	11780	11310	9894	11162	10794	11850
	0.577778	929	862	995	2931	3225	5850	6156	4652	6824	8423	10450	11827	11291	9927	11194	10721	11864
	0.583333	933	868	995	2945	3271	5901	6107	4682	6829	8458	10463	11871	11326	9969	11246	10792	11981
	0.588889	946	871	995	2966	3318	5964	6136	4718	6820	8491	10499	11895	11277	9958	11270	10817	11985
	0.594444	956	880	1016	2961	3396	5991	6168	4766	6853	8477	10534	11899	11279	9984	11233	10797	11939
	0.6	971	893	1009	3004	3430	6042	6204	4787	6873	8515	10581	11918	11267	10052	11214	10860	12008
	0.605556	986	898	1008	3017	3487	6114	6180	4863	6889	8511	10621	11888	11274	9996	11288	10877	12009
	0.611111	1004	904	1012	3044	3536	6131	6197	4914	6927	8583	10694	11919	11269	10074	11284	10930	12059
	0.616667	1012	905	1009	3052	3542	6200	6217	4940	6930	8575	10689	11949	11236	10088	11282	10956	12007
	0.622222	1033	915	1016	3076	3572	6258	6260	4968	6956	8610	10735	11962	11240	10130	11316	10998	12053
	0.627778	1039	922	1020	3116	3614	6300	6294	5010	6972	8616	10773	11960	11200	10117	11312	10966	12054
	0.633333	1046	928	1020	3124	3635	6383	6308	5026	6986	8658	10788	11989	11161	10103	11380	11009	12117
	0.638889	1053	938	1039	3129	3687	6422	6344	5047	7063	8690	10889	12010	11208	10185	11332	10998	12091
	0.644444	1072	936	1033	3142	3730	6469	6375	5087	7055	8705	10903	12062	11110	10248	11378	11041	12099
	0.65	1081	954	1034	3162	3800	6538	6408	5083	7092	8760	10954	12025	11113	10274	11367	11081	12083
	0.655556	1101	957	1030	3178	3880	6617	6456	5098	7059	8788	10981	12036	11084	10266	11385	11099	12158
	0.661111	1108	966	1038	3203	3877	6656	6461	5137	7100	8814	11043	12050	11061	10300	11334	11151	12230
	0.666667	1126	965	1047	3189	3921	6700	6441	5167	7164	8832	11046	12075	11042	10269	11346	11165	12115
	0.672222	1133	972	1040	3239	3944	6716	6489	5175	7143	8840	11076	12102	11027	10284	11367	11052	12103
	0.677778	1160	974	1053	3250	3968	6792	6474	5231	7160	8873	11102	12105	11068	10304	11328	11122	12169
	0.683333	1173	977	1049	3273	3996	6788	6513	5241	7179	8902	11148	12108	11280	10342	11365	11226	12179
	0.688889	1178	996	1050	3273	4031	6842	6535	5272	7211	8967	11134	12137	11419	10329	11365	11196	12232
	0.694444	1190	994	1063	3289	4057	6867	6542	5293	7218	9020	11167	12143	11495	10403	11347	11212	12218
	0.7	1192	1000	1070	3315	4062	6894	6561	5341	7264	9003	11208	12115	11581	10360	11366	11247	12158
	0.705556	1206	1018	1060	3333	4156	6931	6582	5382	7299	9116	11225	12132	11600	10404	11360	11193	12212
	0.711111	1230	1019	1069	3355	4228	6966	6593	5421	7269	9111	11213	12165	11636	10372	11381	11264	12170
	0.716667	1241	1030	1069	3402	4240	6970	6622	5448	7285	9222	11255	12202	11632	10427	11418	11221	12198
	0.722222	1252	1030	1075	3456	4263	6984	6623	5468	7339	9320	11295	12185	11728	10409	11342	11217	12243
	0.727778	1256	1024	1077	3478	4298	7011	6655	5483	7389	9419	11341	12153	11745	10455	11335	11183	12228
	0.733333	1282	1052	1104	3505	4338	7061	6687	5510	7348	9449	11404	12214	11720	10447	11335	11286	12232
	0.738889	1298	1064	1106	3540	4356	7066	6683	5534	7337	9518	11413	12197	11755	10526	11332	11293	12234
	0.744444	1311	1094	1104	3549	4410	7115	6677	5572	7347	9572	11447	12222	11781	10485	11397	11306	12235
	0.75	1316	1092	1115	3576	4449	7116	6720	5584	7369	9606	11493	12258	11760	10502	11380	11346	12255
	0.755556	1317	1102	1130	3583	4452	7146	6730	5624	7376	9620	11495	12250	11795	10512	11382	11347	12240
	0.761111	1339	1110	1117	3577	4481	7118	6720	5640	7394	9662	11528	12244	11834	10578	11369	11337	12270
	0.766667	1353	1114	1135	3620	4510	7129	6786	5674	7390	9711	11538	12237	11809	10632	11367	11355	12291
	0.772222	1368	1127	1151	3617	4513	7175	6790	5671	7373	9697	11554	12253	11804	10616	11388	11342	12257
	0.777778	1377	1116	1154	3643	4528	7199	6744	5691	7423	9737	11596	12257	11798	10643	11347	11351	12306
	0.783333	1402	1132	1159	3668	4552	7206	6798	5706	7410	9739	11561	12271	11786	10652	11400	11399	12312
	0.788889	1407	1130	1180	3662	4595	7258	6816	5743	7476	9759	11618	12293	11773	10641	11304	11346	12347
	0.794444	1440	1136	1184	3672	4615	7284	6840	5766	7450	9789	11652	12293	11810	10676	11338	11403	12287
	0.8	1448	1150	1190	3673	4637	7307	6855	5766	7418	9798	11664	12284	11792	10645	11296	11410	12292
	0.805556	1480	1161	1186	3692	4675	7301	6871	5789	7459	9793	11679	12293	11819	10728	11351	11405	12228
	0.811111	1480	1174	1187	3703	4688	7312	6866	5806	7449	9797	11688	12286	11817	10765	11340	11393	12270
	0.816667	1493	1180	1202	3784	4719	7387	6882	5847	7450	9881	11705	12320	11798	10783	11314	11418	12240
	0.822222	1515	1175	1207	3793	4730	7358	6897	5853	7487	9870	11741	12337	11813	10745	11327	11464	12238
	0.827778	1515	1211	1216	3824	4741	7432	6910	5877	7459	9843	11781	12335	11825	10762	11319	11446	12266
	0.833333	1526	1224	1222	3834	4792	7386	6884	5886	7451	9903	11778	12295	11817	10742	11327	11440	12242
	0.838889	1540	1240	1232	3853	4797	7450	6933	5905	7481	9874	11810	12325	11788	10746	11310	11415	12276
	0.844444	1532	1236	1242	3875	4820	7450	6930	5914	7482	9886	11809	12327	11816	10775	11321	11443	12276
	0.85	1546	1259	1242	3864	4864	7475	6912	5930	7466	9899	11836	12345	11780	10867	11289	11482	12312
	0.855556	1553	1266	1258	3884	4869	7485	6944	5980	7525	9922	11863	12335	11824	10830	11363	11404	12282
	0.861111	1554	1267	1275	3888	4878	7464	6948	6012	7502	9947	11902	12368	11809	10856	11340	11440	12212
	0.866667	1557	1278	1280	3891	4926	7525	6945	6028	7484	9903	11973	12370	11809	10930	11304	11458	12293
	0.872222	1572	1284	1294	3909	4940	7510	7000	6065	7506	9955	11978	12390	11827	10867	11335	11501	12297
	0.877778	1562	1282	1294	3928	4985	7528	7006	6076	7517	9929	12013	12375	11833	10870	11302	11512	12309
	0.883333	1577	1296	1316	3925	5004	7523	6971	6102	7524	9958	12000	12421	11814	10908	11308	11465	12253
	0.888889	1581	1310	1325	3925	5016	7550	7007	6105	7538	9954	12016	12406	11827	10854	11298	11463	12227
	0.894444	1586	1308	1342	3938	5044	7531	7018	6095	7472	9967	12043	12410	11789	10881	11264	11507	12257
	0.9	1601	1325	1344	3946	5050	7564	7056	6134	7515	9992	12040	12425	11813	10929	11294	11452	12247
	0.905556	1595	1339	1353	3946	5082	7583	7049	6142	7534	9993	12100	12450	11807	10907	11298	11473	12244
	0.911111	1622	1337	1368	3948	5106	7590	7082	6161	7569	9991	12139	12394	11777	10927	11290	11519	12224
	0.916667	1636	1353	1374	3948	5157	7608	7097	6165	7572	10009	12132	12375	11799	10919	11286	11505	12282
	0.922222	1646	1355	1394	3982	5319	7582	7102	6207	7535	9992	12187	12411	11792	10981	11330	11444	12287
	0.927778	1675	1373	1405	3974	5517	7557	7110	6225	7558	10014	12191	12407	11779	10967	11241	11468	12309
	0.933333	1703	1387	1417	3970	5583	7621	7142	6251	7585	10044	12193	12421	11774	10947	11266	11491	12217
	0.938889	1744	1390	1419	3985	5659	7571	7063	6278	7559	10000	12248	12451	11793	10956	11292	11475	12246
	0.944444	1771	1396	1421	4005	5686	7603	7136	6291	7579	10012	12222	12429	11774	10999	11260	11491	12309
	0.95	1786	1410	1433	4009	5739	7631	7110	6332	7608	10016	12261	12428	11762	10969	11265	11507	12317

## Sheet: Fig 1c
PSMβ1 kinetics
PSMβ1 monomeric concentration in μg/ml
	Time (h)	20 μg/ml	20 μg/ml	20 μg/ml	22.5 μg/ml	22.5 μg/ml	22.5 μg/ml	25 μg/ml	25 μg/ml	25 μg/ml	30 μg/ml	30 μg/ml	30 μg/ml	35 μg/ml	35 μg/ml	35 μg/ml	40 μg/ml	40 μg/ml	40 μg/ml	50 μg/ml	50 μg/ml	50 μg/ml
	0	844	879	859	952	914	962	941	1013	958	1057	1049	1095	1145	1120	1108	1137	1172	1122	1228	1203	1174
	0.166667	785	812	799	877	845	888	855	908	867	949	941	1041	1061	1035	1010	1059	1079	1015	1158	1133	1102
	0.333333	759	767	762	841	811	841	814	865	836	904	896	1014	1010	997	968	1008	1030	997	1107	1109	1077
	0.5	738	760	738	807	796	817	801	845	810	882	889	995	1003	962	957	978	1043	952	1126	1116	1055
	0.666667	738	737	736	794	783	812	780	847	811	880	877	1022	998	971	951	1005	1022	979	1119	1110	1068
	0.833333	729	746	733	794	769	809	771	833	805	889	872	1009	1011	965	978	989	1046	974	1126	1122	1066
	1	740	751	746	808	775	795	777	822	801	899	887	1017	1001	983	964	1006	1056	997	1123	1160	1097
	1.16667	722	735	726	785	759	801	780	834	794	879	882	1035	1019	987	970	1001	1070	1000	1163	1170	1102
	1.33333	721	744	733	792	768	807	787	839	796	872	894	1024	1048	984	964	1042	1087	1002	1202	1199	1111
	1.5	712	732	734	796	767	804	785	845	790	888	885	1039	1041	1013	988	1045	1113	1011	1213	1236	1127
	1.66667	720	746	727	801	775	808	796	849	792	895	881	1057	1076	1028	1019	1069	1138	1035	1247	1306	1159
	1.83333	714	748	721	786	777	814	784	865	811	904	888	1071	1066	1031	1024	1104	1226	1064	1304	1327	1190
	2	716	744	734	784	782	827	787	864	822	919	924	1081	1087	1055	1029	1115	1228	1074	1342	1390	1297
	2.16667	716	730	723	803	782	814	808	862	809	920	933	1093	1097	1076	1043	1138	1286	1104	1436	1464	1463
	2.33333	746	726	735	806	778	813	803	873	815	943	934	1164	1124	1093	1062	1181	1364	1164	1488	1512	1613
	2.5	710	744	735	802	776	827	812	879	814	936	959	1196	1148	1108	1087	1214	1476	1208	1577	1591	1738
	2.66667	717	756	726	806	784	842	814	907	803	941	1022	1247	1251	1210	1125	1294	1607	1201	1692	1646	1867
	2.83333	712	764	733	806	789	836	814	946	824	926	1100	1301	1336	1276	1207	1406	1699	1296	1844	1707	1945
	3	715	750	715	820	774	833	893	971	850	1028	1153	1359	1462	1391	1321	1485	1757	1446	1980	1766	2051
	3.16667	719	753	745	827	776	836	983	978	906	1098	1225	1421	1521	1498	1406	1576	1813	1551	2056	1810	2120
	3.33333	725	746	743	813	783	837	996	1038	966	1165	1259	1486	1595	1544	1505	1655	1877	1645	2132	1938	2215
	3.5	712	749	755	837	778	845	1054	1065	1013	1230	1323	1545	1628	1610	1558	1723	1987	1698	2173	2046	2229
	3.66667	729	767	739	832	805	838	1085	1094	1038	1295	1425	1561	1694	1661	1609	1756	2051	1790	2225	2083	2331
	3.83333	721	758	731	839	784	852	1154	1138	1082	1351	1460	1661	1750	1706	1720	1814	2074	1905	2247	2137	2379
	4	728	767	726	858	774	845	1211	1185	1168	1420	1505	1697	1791	1749	1768	1904	2121	1972	2297	2181	2395
	4.16667	720	756	740	922	781	890	1271	1251	1214	1492	1558	1769	1838	1811	1809	1958	2196	2016	2363	2233	2437
	4.33333	715	761	720	966	793	866	1353	1308	1265	1568	1635	1845	1889	1871	1841	2016	2238	2038	2384	2215	2453
	4.5	719	757	741	1038	789	877	1415	1354	1349	1681	1730	1893	1936	1915	1888	2087	2283	2131	2363	2253	2500
	4.66667	735	754	747	1075	804	907	1485	1417	1436	1760	1812	1971	2004	1984	1981	2165	2317	2218	2449	2266	2529
	4.83333	730	777	740	1115	789	986	1608	1481	1493	1803	1864	2030	2034	2059	2023	2214	2379	2216	2451	2279	2577
	5	736	771	744	1145	862	1033	1729	1511	1587	1829	1901	2056	2080	2075	2075	2277	2385	2257	2479	2325	2540
	5.16667	734	760	738	1237	928	1083	1782	1570	1651	1933	1949	2136	2131	2145	2087	2345	2399	2303	2485	2347	2558
	5.33333	736	767	741	1279	1018	1112	1874	1656	1710	2015	2023	2190	2161	2178	2134	2367	2409	2343	2498	2369	2596
	5.5	730	772	750	1338	1069	1197	1913	1726	1780	2100	2079	2210	2191	2241	2189	2421	2449	2435	2519	2410	2625
	5.66667	722	765	737	1376	1138	1216	1983	1745	1846	2170	2144	2277	2261	2283	2198	2481	2476	2425	2556	2437	2634
	5.83333	735	769	732	1446	1164	1263	2067	1797	1905	2234	2172	2330	2305	2321	2269	2560	2525	2537	2548	2427	2641
	6	725	775	744	1516	1196	1308	2121	1855	1977	2277	2218	2379	2326	2351	2331	2618	2550	2555	2556	2488	2638
	6.16667	731	777	740	1562	1261	1379	2196	1916	2029	2347	2277	2413	2345	2361	2330	2616	2532	2617	2604	2463	2647
	6.33333	726	778	757	1659	1313	1407	2247	1969	2102	2418	2304	2454	2406	2424	2382	2669	2561	2643	2613	2501	2636
	6.5	743	778	755	1693	1354	1422	2276	1996	2127	2478	2385	2469	2437	2478	2424	2673	2593	2678	2639	2513	2668
	6.66667	741	758	746	1727	1395	1504	2369	2082	2203	2530	2402	2498	2496	2487	2439	2736	2620	2728	2668	2553	2662
	6.83333	737	780	750	1794	1438	1530	2420	2161	2215	2537	2399	2514	2497	2522	2485	2770	2626	2713	2690	2592	2678
	7	738	798	783	1839	1470	1561	2430	2192	2280	2603	2482	2581	2535	2565	2530	2782	2652	2715	2675	2576	2683
	7.16667	744	851	817	1892	1478	1609	2494	2219	2321	2661	2540	2656	2597	2583	2523	2834	2662	2742	2700	2603	2698
	7.33333	762	906	881	1903	1545	1632	2534	2307	2384	2693	2554	2675	2590	2620	2531	2859	2671	2772	2705	2573	2728
	7.5	759	958	909	1996	1601	1722	2620	2345	2427	2746	2575	2711	2647	2646	2579	2911	2702	2810	2749	2644	2723
	7.66667	757	1016	970	2035	1603	1760	2643	2399	2452	2782	2609	2732	2633	2677	2619	2939	2693	2858	2712	2620	2718
	7.83333	770	1070	1005	2039	1642	1810	2680	2448	2563	2836	2704	2819	2676	2680	2608	2960	2731	2854	2733	2648	2696
	8	814	1089	1050	2081	1635	1785	2708	2494	2518	2851	2727	2792	2711	2707	2645	2989	2744	2940	2754	2664	2735
	8.16667	891	1162	1075	2178	1684	1875	2772	2570	2605	2881	2745	2834	2727	2748	2693	2997	2734	2913	2745	2668	2743
	8.33333	910	1193	1139	2196	1723	1912	2829	2608	2644	2944	2767	2843	2765	2777	2693	3079	2759	2931	2823	2700	2729
	8.5	955	1247	1154	2242	1752	1948	2863	2635	2699	2973	2837	2931	2774	2821	2746	3080	2747	2964	2797	2712	2746
	8.66667	1003	1291	1164	2278	1746	1960	2881	2668	2722	3025	2889	2943	2813	2845	2762	3161	2769	3016	2849	2735	2760
	8.83333	1059	1344	1219	2327	1827	2000	2946	2717	2780	3020	2884	2985	2829	2860	2769	3143	2830	3059	2843	2733	2768
	9	1088	1399	1244	2363	1833	2061	2981	2811	2825	3056	2896	3046	2833	2911	2802	3172	2835	3065	2883	2770	2767
	9.16667	1132	1439	1266	2421	1880	2092	3049	2852	2877	3116	2973	3065	2881	2896	2772	3144	2811	3041	2903	2770	2807
	9.33333	1169	1459	1258	2401	1878	2114	3067	2890	2913	3141	2954	3121	2901	2927	2805	3238	2859	3057	2900	2793	2802
	9.5	1214	1524	1309	2458	1932	2146	3120	2945	2949	3180	3081	3082	2918	2981	2837	3266	2910	3166	2917	2842	2783
	9.66667	1262	1572	1335	2488	1953	2192	3180	2992	2982	3170	3034	3149	2951	2991	2884	3275	2907	3146	2910	2826	2826
	9.83333	1291	1618	1357	2547	2010	2250	3266	3071	3027	3221	3062	3216	2986	3016	2904	3334	2896	3184	2945	2837	2827
	10	1309	1639	1381	2564	2003	2261	3283	3132	3075	3235	3095	3256	2985	2987	2885	3339	2950	3174	2963	2862	2821
	10.1667	1366	1670	1416	2598	1997	2300	3286	3141	3113	3318	3115	3263	3047	3119	2898	3389	2978	3237	2996	2878	2814
	10.3333	1396	1712	1414	2631	2043	2361	3364	3222	3145	3320	3134	3247	3089	3103	2945	3419	2988	3284	2994	2875	2854
	10.5	1456	1786	1467	2685	2088	2397	3403	3271	3178	3365	3196	3316	3100	3168	2985	3450	3030	3292	3031	2917	2855
	10.6667	1437	1809	1505	2724	2130	2416	3445	3308	3245	3384	3215	3331	3125	3136	2959	3454	3026	3287	3038	2935	2868
	10.8333	1494	1879	1534	2735	2160	2401	3472	3367	3282	3397	3249	3414	3130	3199	3009	3472	3030	3321	3037	2914	2905
	11	1542	1865	1545	2772	2137	2463	3490	3452	3292	3439	3278	3411	3134	3218	3021	3579	3103	3378	3068	2922	2881
	11.1667	1538	1922	1553	2804	2171	2433	3591	3496	3323	3507	3256	3421	3187	3263	3054	3537	3080	3377	3129	2972	2917
	11.3333	1579	1986	1575	2796	2264	2555	3605	3548	3357	3520	3321	3439	3170	3262	3064	3594	3136	3393	3119	2958	2905
	11.5	1622	2025	1617	2873	2281	2573	3707	3576	3425	3540	3340	3533	3198	3306	3063	3585	3141	3425	3106	2974	2921
	11.6667	1667	2038	1633	2843	2280	2620	3744	3693	3448	3537	3372	3495	3260	3283	3089	3607	3127	3504	3103	3005	2967
	11.8333	1704	2031	1643	2872	2332	2617	3754	3714	3458	3603	3423	3565	3259	3309	3104	3651	3167	3509	3144	2987	2963
	12	1727	2110	1665	2939	2363	2668	3772	3783	3505	3638	3428	3589	3304	3347	3174	3693	3160	3485	3146	3043	2982
	12.1667	1762	2145	1707	2993	2404	2728	3864	3773	3553	3639	3450	3618	3300	3403	3143	3707	3203	3529	3165	3044	2990
	12.3333	1766	2222	1756	3017	2438	2714	3888	3857	3613	3718	3495	3644	3306	3400	3133	3710	3248	3563	3180	3051	2994
	12.5	1801	2184	1747	3039	2432	2761	3924	3910	3627	3746	3497	3691	3334	3361	3178	3739	3265	3585	3203	3070	3022
	12.6667	1851	2225	1759	3060	2446	2783	3976	3945	3682	3750	3531	3697	3338	3412	3223	3825	3286	3625	3219	3083	3000
	12.8333	1884	2270	1798	3096	2491	2809	4049	4015	3728	3770	3582	3703	3353	3474	3229	3821	3263	3647	3255	3085	3003
	13	1894	2302	1824	3186	2546	2873	4084	4056	3768	3823	3560	3777	3334	3480	3239	3798	3294	3712	3270	3116	3045
	13.1667	1906	2367	1870	3186	2593	2909	4146	4121	3826	3830	3639	3785	3422	3494	3275	3864	3310	3727	3278	3124	3026
	13.3333	1932	2357	1876	3189	2584	2942	4201	4189	3833	3888	3648	3816	3409	3515	3253	3858	3298	3724	3299	3147	3037
	13.5	2009	2340	1882	3228	2623	2979	4179	4243	3906	3909	3659	3836	3456	3535	3298	3861	3341	3781	3315	3167	3051
	13.6667	2025	2418	1893	3248	2642	2992	4253	4303	3918	3964	3690	3840	3446	3546	3332	3923	3362	3781	3357	3191	3076
	13.8333	2043	2445	1944	3304	2667	3046	4347	4354	3949	3946	3669	3877	3448	3586	3350	3907	3354	3778	3346	3197	3117
	14	2109	2468	1996	3314	2732	3055	4345	4420	4015	4009	3732	3883	3517	3592	3382	3934	3362	3843	3361	3188	3123
	14.1667	2137	2523	2014	3348	2806	3104	4401	4491	4069	4029	3780	3930	3503	3639	3411	3969	3441	3862	3356	3227	3132
	14.3333	2139	2555	2066	3382	2834	3162	4426	4482	4074	4063	3746	3938	3549	3653	3399	4018	3420	3913	3370	3181	3147
	14.5	2165	2587	2069	3439	2835	3169	4517	4593	4145	4066	3784	3961	3514	3651	3393	4041	3436	3878	3416	3229	3160
	14.6667	2182	2582	2127	3495	2891	3193	4575	4606	4190	4126	3822	4009	3552	3718	3399	4020	3475	3906	3393	3224	3171
	14.8333	2222	2630	2122	3516	2894	3253	4598	4662	4196	4122	3805	4031	3609	3719	3425	4083	3473	3943	3425	3259	3155
	15	2277	2625	2153	3507	2919	3269	4655	4718	4254	4182	3883	4077	3585	3726	3466	4120	3507	3976	3479	3289	3198
	15.1667	2298	2636	2195	3578	2953	3282	4711	4744	4292	4238	3903	4085	3654	3743	3508	4103	3502	4056	3442	3271	3227
	15.3333	2352	2636	2210	3618	2997	3341	4737	4784	4304	4203	3933	4142	3641	3805	3506	4150	3511	4038	3492	3308	3195
	15.5	2393	2673	2256	3662	3024	3368	4802	4830	4355	4269	3934	4115	3654	3756	3498	4168	3525	4078	3473	3325	3189
	15.6667	2413	2718	2289	3662	3020	3439	4817	4876	4442	4286	3949	4106	3697	3808	3526	4193	3572	4110	3478	3353	3268
	15.8333	2453	2762	2289	3697	3060	3468	4926	4983	4436	4342	3939	4112	3679	3795	3556	4187	3578	4149	3503	3357	3279
	16	2478	2738	2339	3742	3102	3492	4934	4985	4535	4380	3999	4132	3705	3830	3521	4213	3601	4119	3499	3384	3294
	16.1667	2500	2783	2370	3761	3114	3522	5015	5049	4516	4409	4033	4167	3714	3849	3592	4228	3594	4149	3564	3382	3271
	16.3333	2540	2817	2409	3843	3211	3542	5047	5125	4528	4416	4002	4197	3738	3878	3616	4277	3584	4160	3551	3367	3265
	16.5	2531	2859	2444	3891	3194	3590	5119	5163	4625	4394	4049	4191	3733	3888	3610	4270	3563	4139	3539	3344	3289
	16.6667	2586	2883	2490	3941	3265	3642	5158	5219	4673	4443	4072	4230	3761	3896	3613	4276	3623	4158	3556	3393	3265
	16.8333	2577	2903	2520	3939	3298	3649	5220	5257	4705	4492	4058	4270	3780	3914	3649	4298	3629	4222	3577	3422	3298
	17	2623	2955	2553	4031	3327	3704	5279	5242	4707	4520	4086	4264	3804	3965	3629	4319	3684	4224	3649	3427	3316
	17.1667	2629	2959	2583	4045	3360	3726	5297	5344	4757	4546	4084	4295	3811	3942	3667	4380	3695	4278	3631	3439	3338
	17.3333	2659	3001	2611	4078	3414	3737	5350	5384	4859	4573	4146	4350	3834	3929	3670	4399	3676	4304	3616	3457	3349
	17.5	2702	3017	2656	4122	3417	3769	5427	5438	4865	4641	4178	4349	3862	3971	3701	4406	3684	4290	3634	3504	3379
	17.6667	2735	3022	2666	4121	3449	3821	5479	5494	4898	4648	4218	4373	3863	3991	3712	4414	3714	4325	3621	3472	3323
	17.8333	2761	2984	2705	4124	3467	3894	5462	5548	4921	4675	4248	4397	3926	4032	3695	4435	3741	4322	3691	3485	3376
	18	2809	3010	2724	4178	3523	3883	5516	5617	4974	4705	4254	4420	3922	4034	3765	4432	3780	4348	3685	3514	3407
	18.1667	2845	3063	2753	4201	3527	3942	5538	5572	5062	4745	4243	4403	3889	4026	3826	4473	3773	4382	3705	3460	3406
	18.3333	2865	3091	2773	4273	3602	3959	5599	5633	5079	4742	4327	4483	3940	4037	3842	4484	3817	4399	3689	3518	3441
	18.5	2913	3109	2768	4314	3603	4031	5688	5675	5133	4817	4283	4450	3992	4123	3842	4524	3796	4451	3738	3540	3423
	18.6667	2955	3140	2837	4360	3651	4056	5761	5723	5167	4799	4347	4469	3988	4078	3827	4543	3798	4456	3730	3529	3467
	18.8333	2959	3157	2852	4396	3680	4086	5730	5761	5207	4831	4355	4504	4002	4105	3868	4573	3848	4491	3684	3587	3479
	19	2982	3171	2911	4439	3729	4138	5807	5796	5255	4920	4399	4527	4031	4127	3843	4612	3828	4481	3698	3578	3494
	19.1667	3043	3189	2923	4508	3769	4202	5866	5840	5280	4908	4386	4588	4007	4142	3864	4590	3876	4530	3763	3571	3478
	19.3333	3045	3245	2968	4495	3803	4222	5888	5933	5347	4928	4415	4620	4033	4195	3882	4610	3893	4508	3803	3566	3513
	19.5	3087	3251	3000	4533	3870	4298	5923	5910	5404	5013	4445	4620	4050	4156	3893	4654	3908	4559	3792	3581	3515
	19.6667	3132	3258	2982	4573	3855	4318	5980	6006	5441	4978	4425	4605	4052	4201	3945	4640	3916	4597	3765	3565	3556
	19.8333	3155	3286	3016	4621	3921	4358	6020	6047	5473	5053	4427	4640	4059	4215	3961	4675	3926	4572	3799	3640	3572
	20	3160	3305	3095	4677	3948	4345	6071	6050	5540	5050	4483	4655	4073	4242	3925	4700	3921	4598	3795	3623	3561
	20.1667	3243	3335	3122	4719	3996	4401	6099	6090	5547	5109	4532	4675	4101	4272	3951	4705	3931	4624	3818	3617	3548
	20.3333	3231	3379	3126	4757	4055	4422	6113	6127	5557	5148	4491	4715	4129	4307	3972	4739	3973	4618	3823	3658	3583
	20.5	3302	3358	3157	4763	4092	4450	6229	6175	5639	5165	4586	4776	4106	4302	4003	4737	4000	4641	3845	3683	3591
	20.6667	3294	3417	3220	4802	4106	4512	6265	6249	5709	5178	4604	4748	4124	4326	3988	4761	4000	4654	3835	3654	3632
	20.8333	3371	3404	3229	4820	4139	4601	6278	6321	5730	5216	4565	4766	4125	4338	4048	4813	4001	4691	3847	3715	3611
	21	3391	3425	3274	4876	4191	4542	6357	6292	5820	5297	4658	4783	4174	4357	4016	4813	4045	4735	3831	3698	3687
	21.1667	3386	3470	3281	4903	4228	4651	6385	6386	5766	5243	4666	4835	4149	4379	4038	4824	4038	4728	3921	3690	3692
	21.3333	3468	3467	3326	4974	4266	4676	6390	6378	5835	5321	4658	4847	4190	4343	4075	4802	4046	4731	3903	3705	3699
	21.5	3453	3486	3372	5023	4294	4728	6421	6409	5894	5354	4668	4886	4170	4383	4073	4892	4085	4763	3883	3731	3710
	21.6667	3496	3520	3390	5027	4320	4771	6503	6505	5942	5356	4696	4865	4193	4401	4163	4896	4064	4778	3898	3742	3678
	21.8333	3521	3558	3402	5089	4384	4794	6535	6501	5950	5437	4732	4857	4184	4436	4119	4891	4112	4789	3890	3756	3730
	22	3563	3545	3435	5076	4434	4816	6565	6531	5980	5468	4733	4909	4202	4439	4102	4900	4105	4808	3896	3740	3722
	22.1667	3597	3603	3456	5119	4460	4844	6613	6535	6048	5428	4738	4960	4220	4463	4176	4965	4141	4795	3893	3758	3772
	22.3333	3616	3601	3509	5101	4459	4906	6630	6606	6086	5511	4800	4971	4294	4440	4172	4944	4122	4816	3942	3771	3754
	22.5	3656	3633	3536	5180	4490	4927	6661	6597	6116	5523	4837	4967	4275	4509	4167	4993	4156	4871	3964	3755	3764
	22.6667	3687	3648	3556	5180	4615	4978	6732	6619	6171	5597	4810	5012	4235	4536	4208	4987	4129	4849	3966	3795	3804
	22.8333	3684	3667	3589	5250	4586	5036	6743	6664	6195	5576	4821	5067	4299	4532	4202	5062	4207	4853	3956	3785	3815
	23	3766	3720	3592	5283	4670	5045	6802	6767	6224	5655	4863	5089	4271	4540	4240	5024	4173	4941	3925	3815	3810
	23.1667	3813	3696	3651	5284	4702	5097	6820	6769	6314	5654	4897	5058	4302	4588	4221	5045	4191	4930	3994	3869	3829
	23.3333	3825	3735	3706	5293	4709	5134	6853	6762	6305	5667	4881	5056	4326	4588	4233	5055	4225	4935	4013	3824	3838
	23.5	3855	3756	3689	5332	4746	5205	6904	6843	6381	5679	4905	5128	4366	4585	4291	5075	4216	4945	3972	3861	3876
	23.6667	3860	3798	3739	5366	4823	5243	6933	6837	6423	5712	4941	5159	4371	4629	4289	5113	4287	4988	3998	3856	3858
	23.8333	3893	3828	3734	5390	4828	5263	6915	6914	6429	5743	4921	5153	4364	4635	4324	5116	4261	5011	4060	3866	3913
	24	3881	3773	3755	5420	4859	5295	7010	6947	6419	5802	4969	5152	4369	4651	4298	5145	4241	5029	4044	3871	3910
	24.1667	3908	3843	3811	5454	4922	5305	7056	6953	6490	5804	4998	5213	4392	4636	4351	5137	4255	5008	4018	3907	3895
	24.3333	3967	3857	3847	5480	4929	5361	7032	6953	6521	5885	5011	5205	4441	4663	4346	5162	4286	5032	4057	3895	3924
	24.5	3958	3887	3880	5506	4982	5388	7058	7015	6598	5886	5060	5220	4429	4699	4379	5134	4286	5085	4039	3917	3948
	24.6667	4041	3915	3898	5538	5010	5413	7124	7010	6614	5970	5064	5278	4399	4706	4377	5224	4344	5079	4037	3895	3961
	24.8333	4019	3962	3946	5553	5038	5466	7108	7061	6594	5943	5057	5272	4434	4738	4402	5193	4312	5106	4072	3946	3983
	25	4075	3946	3979	5569	5061	5519	7192	7036	6700	5979	5095	5282	4470	4755	4366	5226	4344	5134	4066	3937	3970
	25.1667	4088	3978	4021	5637	5068	5542	7198	7066	6729	6040	5100	5335	4497	4750	4395	5222	4332	5160	4089	3960	4011
	25.3333	4141	4026	4024	5605	5112	5615	7251	7130	6775	6059	5111	5310	4468	4752	4446	5225	4347	5136	4088	3985	4021
	25.5	4145	4018	4022	5666	5186	5592	7215	7118	6750	6057	5134	5361	4497	4732	4443	5230	4378	5157	4123	3993	3997
	25.6667	4144	4057	4106	5677	5197	5687	7253	7162	6761	6077	5179	5405	4511	4794	4458	5243	4357	5173	4128	4017	4040
	25.8333	4142	4042	4092	5716	5263	5691	7266	7187	6826	6145	5199	5428	4538	4787	4499	5257	4428	5160	4130	4001	4037
	26	4142	4119	4131	5743	5225	5716	7290	7236	6861	6184	5230	5444	4544	4817	4504	5303	4454	5164	4120	4034	4079
	26.1667	4270	4132	4178	5794	5305	5778	7351	7268	6931	6175	5209	5459	4564	4873	4526	5329	4428	5205	4138	4007	4085
	26.3333	4206	4146	4168	5786	5310	5794	7359	7245	6884	6177	5254	5460	4571	4872	4544	5330	4439	5222	4162	4053	4103
	26.5	4289	4178	4217	5811	5375	5835	7361	7284	6940	6224	5282	5553	4583	4927	4490	5362	4445	5208	4153	4054	4136
	26.6667	4271	4191	4234	5818	5386	5778	7450	7345	6947	6256	5291	5562	4603	4893	4547	5379	4419	5255	4171	4036	4127
	26.8333	4315	4238	4290	5797	5436	5857	7433	7344	6971	6278	5317	5573	4545	4925	4596	5363	4494	5267	4178	4106	4211
	27	4329	4222	4315	5835	5488	5927	7408	7304	6984	6347	5381	5602	4600	4954	4606	5383	4465	5320	4219	4090	4156
	27.1667	4365	4245	4352	5858	5505	5979	7448	7395	7082	6340	5395	5614	4630	4954	4581	5381	4486	5306	4185	4126	4215
	27.3333	4301	4290	4392	5877	5472	5933	7515	7435	7012	6377	5376	5638	4604	5011	4619	5350	4558	5362	4184	4090	4240
	27.5	4366	4303	4410	5899	5534	6000	7525	7375	7088	6375	5376	5660	4669	4976	4627	5449	4536	5349	4208	4116	4208
	27.6667	4409	4324	4411	5897	5528	6044	7573	7389	7115	6454	5410	5680	4690	4963	4625	5479	4528	5407	4220	4169	4232
	27.8333	4432	4350	4428	5975	5632	6051	7529	7437	7118	6485	5468	5713	4673	5029	4678	5475	4517	5350	4253	4140	4229
	28	4402	4351	4466	5954	5628	6122	7605	7433	7137	6521	5498	5744	4713	5000	4680	5415	4566	5408	4256	4137	4277
	28.1667	4458	4430	4528	5992	5625	6124	7644	7396	7181	6560	5487	5759	4729	5043	4684	5509	4596	5368	4256	4159	4312
	28.3333	4471	4409	4555	5982	5674	6153	7631	7465	7207	6532	5489	5772	4709	5028	4726	5546	4610	5392	4268	4148	4300
	28.5	4493	4479	4547	6021	5715	6145	7644	7497	7217	6592	5523	5809	4731	5078	4722	5530	4630	5419	4240	4161	4311
	28.6667	4502	4489	4562	6061	5732	6213	7653	7480	7226	6575	5506	5827	4724	5076	4683	5510	4590	5430	4254	4203	4309
	28.8333	4506	4470	4581	6093	5739	6243	7725	7603	7234	6589	5549	5866	4742	5126	4727	5548	4616	5405	4277	4192	4317
	29	4501	4527	4666	6068	5776	6288	7720	7593	7280	6620	5591	5911	4761	5149	4724	5560	4613	5496	4303	4217	4355
	29.1667	4568	4558	4624	6048	5734	6250	7728	7589	7288	6645	5575	5863	4767	5173	4748	5535	4632	5473	4294	4218	4375
	29.3333	4587	4519	4675	6050	5851	6323	7792	7535	7274	6714	5598	5911	4757	5156	4767	5598	4650	5498	4269	4191	4409
	29.5	4599	4543	4676	6100	5849	6322	7769	7620	7356	6730	5670	5939	4787	5202	4812	5614	4694	5494	4298	4245	4402
	29.6667	4602	4623	4731	6101	5877	6390	7753	7620	7342	6723	5640	5981	4802	5180	4758	5590	4665	5508	4331	4217	4419
	29.8333	4664	4625	4734	6133	5898	6386	7758	7612	7343	6780	5659	6041	4839	5173	4766	5607	4659	5511	4312	4258	4425
	30	4665	4658	4748	6171	5938	6488	7767	7666	7393	6745	5663	6024	4852	5238	4837	5597	4696	5504	4329	4258	4462
	30.1667	4669	4668	4789	6126	5929	6420	7807	7687	7422	6791	5706	6046	4825	5273	4880	5648	4734	5576	4323	4283	4464
	30.3333	4704	4690	4824	6134	5961	6513	7839	7702	7400	6825	5672	6067	4859	5235	4882	5654	4719	5576	4344	4279	4501
	30.5	4701	4683	4836	6195	6012	6496	7818	7678	7464	6843	5771	6108	4893	5280	4902	5644	4710	5605	4380	4288	4497
	30.6667	4685	4772	4855	6113	6003	6543	7850	7651	7436	6901	5775	6129	4899	5300	4887	5661	4754	5622	4385	4317	4504
	30.8333	4752	4782	4854	6150	6044	6548	7843	7686	7516	6919	5747	6173	4872	5292	4878	5661	4778	5627	4393	4334	4488
	31	4784	4800	4922	6170	6053	6511	7893	7708	7453	6924	5798	6157	4889	5310	4884	5732	4774	5644	4375	4283	4535
	31.1667	4791	4829	4959	6212	6061	6548	7870	7641	7501	6939	5774	6179	4903	5388	4935	5685	4781	5629	4377	4353	4536
	31.3333	4816	4852	4941	6202	6056	6607	7900	7769	7500	6979	5849	6197	4903	5311	4932	5733	4841	5675	4387	4318	4574
	31.5	4854	4842	4956	6207	6117	6645	7903	7739	7471	7034	5828	6280	4905	5382	4948	5710	4808	5633	4392	4350	4583
	31.6667	4818	4859	4996	6216	6096	6621	7884	7726	7508	7035	5884	6211	4955	5349	4960	5775	4826	5686	4458	4367	4603
	31.8333	4863	4946	5056	6231	6116	6704	7880	7739	7515	7048	5898	6287	4923	5357	4987	5750	4818	5689	4395	4390	4606
	32	4880	4965	5013	6223	6128	6696	7931	7758	7536	7081	5911	6314	4927	5408	5002	5728	4875	5703	4436	4384	4621
	32.1667	4870	4916	5080	6240	6159	6721	7926	7755	7516	7057	5884	6375	4969	5413	5003	5758	4873	5691	4433	4387	4689
	32.3333	4926	4958	5033	6238	6214	6718	7969	7749	7540	7127	5912	6363	4990	5439	5005	5734	4858	5704	4451	4388	4640
	32.5	4887	4976	5103	6242	6191	6729	7956	7754	7569	7094	5941	6422	4993	5446	4980	5779	4915	5705	4436	4416	4661
	32.6667	4919	4998	5087	6230	6211	6797	7987	7787	7606	7133	5941	6414	4978	5435	4978	5819	4873	5720	4449	4404	4649
	32.8333	4969	5059	5113	6293	6221	6765	7955	7798	7576	7161	5937	6505	4972	5520	5074	5828	4910	5762	4459	4433	4711
	33	4949	5042	5143	6266	6226	6790	8019	7822	7609	7165	6003	6430	4993	5491	5054	5843	4882	5732	4486	4404	4744
	33.1667	5007	5054	5165	6266	6208	6849	7990	7778	7610	7182	6034	6468	4995	5526	5064	5810	4918	5789	4458	4426	4707
	33.3333	5016	5142	5187	6250	6248	6767	7989	7744	7596	7249	6055	6536	5044	5513	5066	5819	4961	5749	4481	4456	4752
	33.5	5029	5142	5195	6312	6287	6851	8015	7756	7621	7201	6039	6545	5024	5551	5107	5798	4953	5808	4483	4513	4737
	33.6667	5056	5136	5213	6284	6278	6884	7990	7794	7659	7216	6079	6532	5022	5559	5056	5870	4922	5827	4484	4471	4801
	33.8333	5043	5142	5223	6296	6284	6862	7997	7822	7640	7280	6083	6589	5070	5570	5130	5867	4967	5837	4527	4508	4774
	34	5054	5187	5242	6297	6288	6918	8003	7797	7642	7268	6118	6594	5058	5569	5188	5864	5000	5788	4550	4507	4826
	34.1667	5089	5217	5238	6323	6313	6949	7965	7835	7594	7330	6135	6641	5068	5572	5158	5892	4967	5848	4523	4514	4809
	34.3333	5092	5223	5237	6328	6312	6914	8004	7782	7633	7298	6111	6626	5070	5650	5113	5839	4984	5884	4505	4521	4840
	34.5	5080	5260	5278	6303	6336	6958	7980	7742	7648	7291	6126	6703	5078	5646	5132	5897	5008	5876	4548	4514	4859
	34.6667	5115	5296	5284	6319	6346	6965	7988	7848	7616	7353	6168	6705	5124	5657	5156	5974	5048	5893	4532	4548	4888
	34.8333	5113	5249	5356	6310	6334	7020	7973	7834	7639	7377	6134	6688	5086	5654	5211	5840	5014	5904	4559	4579	4853
	35	5124	5315	5348	6260	6322	7005	8052	7809	7646	7374	6189	6784	5103	5631	5155	5906	5016	5903	4579	4548	4902
	35.1667	5129	5322	5374	6337	6376	7020	8049	7814	7666	7389	6181	6778	5153	5703	5190	5868	5087	5937	4535	4593	4944
	35.3333	5139	5380	5351	6330	6362	6996	8003	7897	7631	7423	6221	6793	5128	5730	5238	5926	5074	5889	4558	4580	4938
	35.5	5209	5350	5371	6371	6371	7090	8070	7837	7657	7458	6215	6864	5129	5719	5247	5961	5065	5953	4596	4549	4963
	35.6667	5196	5362	5431	6301	6388	7098	8067	7869	7676	7478	6242	6851	5168	5699	5203	5982	5089	5969	4600	4638	4982
	35.8333	5198	5400	5395	6339	6383	7136	8113	7833	7675	7495	6227	6848	5153	5811	5271	5954	5123	5971	4616	4620	4992
	36	5208	5395	5374	6330	6431	7052	8066	7850	7682	7468	6255	6871	5169	5763	5278	5953	5102	6017	4632	4641	4971
	36.1667	5247	5477	5425	6357	6448	7126	8065	7853	7696	7517	6286	6941	5170	5780	5286	5999	5105	5976	4617	4627	4989
	36.3333	5212	5429	5409	6306	6474	7145	8061	7829	7662	7504	6274	6951	5159	5776	5287	5989	5115	6013	4598	4629	5055
	36.5	5232	5541	5459	6310	6432	7103	8063	7875	7656	7511	6300	6947	5193	5819	5332	6019	5161	6038	4637	4653	5120
	36.6667	5288	5497	5491	6333	6438	7171	8075	7875	7672	7556	6354	6976	5194	5848	5327	5997	5171	6033	4668	4662	5098
	36.8333	5311	5515	5456	6317	6487	7154	8088	7889	7705	7539	6326	7020	5222	5863	5345	6025	5199	6048	4643	4689	5049
	37	5321	5561	5524	6387	6485	7186	8100	7902	7734	7584	6320	7071	5248	5845	5382	5996	5151	6026	4668	4696	5062
	37.1667	5324	5576	5528	6325	6480	7176	8068	7813	7697	7517	6329	7045	5259	5859	5385	5987	5173	6018	4679	4676	5092
	37.3333	5310	5585	5522	6357	6531	7251	8058	7870	7735	7594	6346	7105	5243	5895	5380	6009	5209	6043	4675	4707	5172
	37.5	5333	5606	5528	6370	6527	7188	8107	7852	7734	7597	6392	7144	5274	5916	5420	6055	5210	6058	4653	4698	5110
	37.6667	5377	5602	5548	6378	6488	7263	8099	7868	7725	7631	6433	7153	5283	5919	5435	6083	5244	6091	4699	4728	5147
	37.8333	5354	5632	5537	6366	6590	7235	8087	7856	7767	7624	6430	7151	5235	5972	5445	6035	5246	6075	4756	4760	5127
	38	5385	5669	5554	6328	6562	7247	8054	7900	7691	7686	6431	7150	5298	5980	5387	6061	5222	6087	4707	4743	5172
	38.1667	5380	5642	5544	6361	6502	7275	8088	7844	7707	7618	6468	7176	5249	6011	5458	6078	5244	6098	4727	4761	5268
	38.3333	5430	5643	5592	6352	6596	7290	8118	7864	7778	7750	6450	7242	5280	5997	5414	6077	5252	6112	4740	4788	5262
	38.5	5453	5652	5581	6357	6567	7281	8054	7822	7718	7738	6457	7270	5279	5996	5471	6113	5226	6084	4728	4786	5192
	38.6667	5421	5694	5569	6324	6517	7286	8092	7916	7704	7718	6495	7227	5294	6062	5512	6110	5239	6098	4748	4794	5246
	38.8333	5433	5694	5537	6333	6574	7294	8005	7877	7731	7688	6521	7282	5301	6063	5506	6101	5269	6154	4754	4772	5255
	39	5427	5687	5518	6342	6562	7328	8072	7844	7732	7734	6508	7322	5305	6030	5513	6081	5284	6154	4730	4784	5253
	39.1667	5466	5690	5609	6367	6601	7280	8089	7870	7717	7734	6518	7333	5286	6078	5473	6206	5300	6154	4767	4799	5293
	39.3333	5475	5687	5608	6370	6575	7359	8073	7857	7755	7794	6517	7377	5305	6092	5505	6114	5332	6168	4767	4798	5305
	39.5	5462	5737	5564	6387	6579	7342	8112	7901	7771	7739	6522	7374	5364	6056	5588	6138	5259	6183	4770	4840	5369
	39.6667	5440	5650	5585	6372	6585	7391	8074	7853	7729	7757	6527	7418	5318	6158	5554	6113	5311	6179	4789	4838	5296
	39.8333	5495	5725	5625	6322	6539	7353	8066	7843	7763	7804	6544	7383	5385	6112	5589	6141	5314	6185	4804	4848	5296
	40	5515	5753	5588	6308	6592	7360	8095	7881	7785	7764	6541	7463	5335	6178	5603	6162	5324	6221	4819	4838	5357
	40.1667	5536	5786	5656	6364	6612	7390	8111	7882	7766	7810	6626	7474	5407	6168	5609	6192	5347	6228	4859	4888	5393
	40.3333	5501	5751	5600	6324	6631	7361	8071	7895	7755	7855	6571	7494	5379	6226	5582	6186	5368	6236	4873	4890	5404
	40.5	5496	5798	5604	6381	6639	7435	8112	7861	7717	7863	6524	7471	5471	6170	5646	6215	5384	6244	4810	4876	5430
	40.6667	5557	5768	5610	6358	6624	7435	8069	7837	7765	7834	6598	7536	5420	6272	5658	6157	5383	6279	4848	4890	5441
	40.8333	5548	5835	5609	6326	6642	7492	8107	7875	7812	7873	6605	7531	5428	6250	5658	6197	5351	6224	4887	4895	5463
	41	5572	5837	5655	6377	6659	7443	8125	7852	7717	7823	6605	7552	5449	6328	5675	6230	5387	6272	4881	4951	5480
	41.1667	5583	5818	5661	6350	6684	7383	8149	7842	7790	7835	6658	7637	5446	6346	5700	6265	5390	6255	4845	4920	5515
	41.3333	5590	5841	5643	6364	6668	7535	8112	7855	7803	7881	6705	7682	5451	6266	5711	6211	5400	6307	4907	4974	5498
	41.5	5559	5810	5686	6306	6646	7484	8134	7873	7790	7893	6732	7643	5480	6327	5706	6207	5438	6290	4879	4960	5541
	41.6667	5610	5852	5652	6303	6625	7447	8085	7892	7754	7929	6669	7691	5425	6318	5753	6257	5450	6341	4902	4953	5539
	41.8333	5631	5841	5706	6357	6673	7473	8121	7929	7754	7975	6707	7676	5505	6367	5737	6173	5418	6306	4921	4965	5570
	42	5625	5884	5645	6328	6650	7483	8047	7894	7785	7917	6689	7697	5480	6421	5790	6231	5476	6333	4904	5011	5573
	42.1667	5640	5849	5654	6309	6731	7473	8117	7829	7730	7937	6706	7736	5472	6355	5778	6268	5475	6331	4931	5011	5614
	42.3333	5631	5856	5681	6342	6703	7485	8126	7905	7754	7982	6727	7744	5522	6420	5854	6235	5522	6334	4964	4980	5628
	42.5	5647	5932	5698	6353	6693	7520	8126	7870	7769	7971	6738	7747	5510	6426	5813	6281	5505	6368	4985	5086	5654
	42.6667	5654	5885	5698	6312	6689	7477	8114	7842	7804	7992	6754	7768	5556	6398	5833	6290	5518	6394	5013	5012	5662
	42.8333	5672	5907	5687	6357	6765	7509	8123	7851	7744	7982	6796	7853	5542	6479	5842	6281	5550	6369	5002	5046	5698
	43	5732	5925	5697	6337	6710	7559	8115	7870	7771	8031	6803	7826	5589	6473	5915	6288	5522	6393	4965	5071	5714
	43.1667	5673	5934	5733	6310	6729	7539	8093	7890	7777	8021	6758	7910	5586	6473	5896	6316	5574	6397	4992	5064	5718
	43.3333	5669	5951	5712	6337	6770	7562	8144	7869	7752	8023	6787	7847	5587	6504	5927	6333	5563	6419	5000	5067	5711
	43.5	5737	5956	5731	6305	6719	7534	8170	7891	7809	7994	6851	7897	5626	6526	5910	6354	5581	6425	5020	5094	5742
	43.6667	5700	5966	5752	6335	6782	7610	8132	7863	7779	8036	6772	7870	5636	6537	5950	6384	5569	6460	5011	5094	5749
	43.8333	5688	5997	5718	6354	6795	7558	8173	7853	7776	8004	6850	7934	5623	6585	5909	6368	5603	6414	5054	5105	5762
	44	5779	5943	5695	6300	6821	7571	8127	7856	7810	8105	6879	8010	5589	6572	5921	6340	5630	6457	5069	5104	5877
	44.1667	5715	5965	5713	6339	6788	7624	8145	7913	7796	8023	6909	8042	5665	6594	5998	6349	5647	6438	5092	5148	5857
	44.3333	5744	5985	5716	6304	6774	7652	8135	7845	7822	8052	6827	7976	5659	6659	5986	6422	5640	6487	5071	5150	5840
	44.5	5725	6003	5747	6346	6774	7605	8161	7902	7852	8058	6883	7962	5669	6636	5975	6380	5667	6501	5088	5171	5824
	44.6667	5775	5977	5720	6348	6796	7600	8145	7893	7812	8084	6909	8053	5696	6629	6042	6420	5658	6496	5098	5177	5887
	44.8333	5779	5978	5762	6328	6779	7626	8137	7883	7771	8153	6890	7971	5638	6714	6072	6411	5662	6502	5089	5143	5903
	45	5753	6036	5699	6334	6790	7646	8173	7877	7787	8155	6927	8105	5698	6676	6012	6431	5732	6497	5138	5203	5910
	45.1667	5794	6014	5769	6309	6792	7595	8180	7935	7819	8143	6910	8119	5692	6707	6049	6458	5686	6509	5113	5202	5917
	45.3333	5803	5996	5750	6309	6826	7668	8213	7849	7791	8082	6971	8098	5727	6749	6096	6431	5727	6496	5203	5229	5928
	45.5	5818	6058	5705	6359	6834	7669	8150	7904	7775	8179	6937	8112	5742	6698	6089	6461	5721	6511	5107	5250	5988
	45.6667	5841	6023	5761	6350	6852	7637	8162	7934	7770	8230	6943	8125	5736	6786	6067	6502	5791	6512	5202	5294	6003
	45.8333	5847	6007	5719	6303	6848	7712	8164	7907	7825	8132	7014	8180	5736	6753	6154	6479	5826	6615	5185	5273	5999
	46	5823	6029	5719	6309	6839	7712	8164	7877	7788	8234	6946	8250	5750	6816	6150	6447	5772	6622	5177	5263	6018
	46.1667	5851	6023	5783	6293	6856	7673	8155	7874	7761	8146	6982	8203	5810	6808	6164	6481	5752	6588	5198	5279	6042
	46.3333	5814	6058	5729	6300	6845	7682	8158	7891	7858	8200	7010	8246	5798	6841	6148	6525	5745	6590	5192	5277	6064

## Sheet: Fig 1d
PSMα1 kinetics in presence of low regime of seeds
		Seed concentration
	Time (h)	0 nM	0 nM	0 nM	10 nM	10 nM	10 nM	50 nM	50 nM	50 nM	250nM	250 nM	250 nM
	0	114	123	125	131	132	129	137	132	151	254	198	207
	0.166667	106	113	114	121	125	126	127	128	144	192	164	173
	0.333333	107	109	110	120	124	119	125	123	139	166	154	155
	0.5	103	111	110	116	124	116	122	116	139	158	153	154
	0.666667	103	109	106	118	119	118	121	121	135	156	145	151
	0.833333	105	105	106	116	118	118	120	120	136	159	147	151
	1	103	108	107	116	121	116	123	116	141	155	148	152
	1.16667	104	105	106	115	118	116	119	115	137	157	148	150
	1.33333	102	108	106	116	118	112	122	119	138	164	153	157
	1.5	100	105	103	113	117	118	121	118	138	168	157	165
	1.66667	103	109	106	118	119	116	120	118	140	172	161	171
	1.83333	101	104	105	116	121	116	121	117	140	180	168	180
	2	101	105	102	113	116	113	121	119	141	195	180	198
	2.16667	100	106	110	117	118	113	119	119	137	204	195	215
	2.33333	98	103	104	116	117	113	120	122	140	226	208	240
	2.5	98	102	107	113	117	115	124	119	140	249	233	274
	2.66667	99	102	102	115	120	118	121	119	141	280	260	305
	2.83333	100	106	106	115	116	114	120	121	145	315	290	354
	3	97	102	105	116	114	113	122	121	146	366	338	419
	3.16667	101	106	104	113	118	116	122	121	148	426	388	495
	3.33333	99	104	106	114	118	116	123	125	152	507	460	578
	3.5	100	104	104	114	116	117	127	127	154	609	556	699
	3.66667	101	108	105	117	121	117	131	134	166	745	676	833
	3.83333	98	101	104	118	116	116	137	142	173	927	833	1021
	4	100	106	105	112	122	120	141	149	187	1165	1051	1250
	4.16667	97	105	108	116	121	120	146	164	200	1464	1326	1521
	4.33333	100	106	103	120	125	127	160	180	224	1829	1672	1857
	4.5	100	105	106	124	129	129	170	203	261	2296	2097	2271
	4.66667	101	105	105	130	120	129	189	238	295	2846	2614	2738
	4.83333	98	104	103	132	129	132	214	279	338	3484	3229	3281
	5	99	104	102	135	135	148	249	329	409	4171	3924	3901
	5.16667	100	105	107	147	142	158	287	398	488	4955	4659	4534
	5.33333	98	104	101	155	148	162	337	489	591	5786	5484	5241
	5.5	100	107	107	173	151	177	408	606	726	6655	6342	6000
	5.66667	97	104	104	188	164	195	487	746	888	7578	7236	6764
	5.83333	99	106	101	211	174	212	591	911	1101	8454	8121	7579
	6	100	104	104	236	192	245	714	1115	1357	9377	9035	8404
	6.16667	97	108	104	267	211	277	872	1358	1658	10233	9868	9259
	6.33333	100	106	108	301	232	308	1067	1644	2016	11092	10692	10071
	6.5	96	103	104	349	263	361	1307	1982	2430	11877	11517	10889
	6.66667	100	102	107	403	296	412	1580	2377	2877	12643	12232	11750
	6.83333	101	102	103	476	337	481	1903	2841	3410	13357	12855	12449
	7	98	105	105	552	381	552	2263	3308	3996	14034	13443	13200
	7.16667	102	106	101	644	446	643	2661	3856	4584	14575	13939	13785
	7.33333	100	106	105	752	508	749	3103	4432	5190	15096	14364	14318
	7.5	103	103	102	880	587	867	3573	5016	5851	15437	14752	14739
	7.66667	98	107	105	1039	673	1010	4107	5660	6487	15722	15097	14946
	7.83333	99	104	104	1224	767	1169	4655	6327	7137	15859	15369	15235
	8	97	106	106	1422	894	1350	5179	7012	7768	15919	15600	15368
	8.16667	99	106	105	1657	1024	1564	5756	7678	8377	16052	15729	15428
	8.33333	99	108	108	1900	1175	1797	6350	8444	8875	16097	15921	15563
	8.5	100	106	109	2164	1344	2052	6934	9014	9299	16180	15971	15722
	8.66667	102	109	105	2475	1533	2339	7570	9564	9588	16254	16066	15877
	8.83333	98	105	111	2832	1747	2633	8104	9996	9787	16401	16222	16077
	9	97	109	107	3191	1989	2950	8661	10356	9961	16534	16146	16329
	9.16667	101	111	112	3574	2257	3307	9192	10562	10177	16640	16336	16507
	9.33333	101	110	113	3979	2557	3661	9598	10766	10471	16691	16396	16788
	9.5	101	113	113	4405	2865	4043	9916	10991	10751	16798	16512	16903
	9.66667	103	116	120	4829	3198	4417	10171	11348	11056	16934	16599	17096
	9.83333	103	115	118	5239	3569	4786	10410	11637	11386	16911	16634	17173
	10	108	115	118	5701	3941	5175	10630	11910	11674	17013	16662	17236
	10.1667	112	119	121	6191	4304	5585	10840	12155	11953	17054	16748	17383
	10.3333	112	122	124	6680	4696	6058	11040	12429	12236	17090	16738	17448
	10.5	115	120	125	7228	5093	6603	11305	12644	12543	17200	16758	17455
	10.6667	116	123	124	7791	5455	7130	11548	12899	12774	17214	16772	17506
	10.8333	119	126	126	8400	5866	7767	11782	13132	12991	17252	16725	17484
	11	126	125	128	8952	6284	8348	11971	13327	13186	17260	16707	17581
	11.1667	129	131	130	9482	6696	8979	12192	13561	13400	17299	16766	17489
	11.3333	135	138	137	9890	7213	9505	12449	13738	13592	17243	16721	17524
	11.5	141	138	141	10230	7766	9972	12636	13945	13738	17278	16787	17534
	11.6667	146	141	146	10409	8261	10312	12832	14134	13900	17308	16843	17538
	11.8333	149	144	149	10628	8757	10569	13036	14255	14046	17353	16717	17573
	12	165	145	158	10919	9234	10768	13238	14386	14124	17313	16847	17564
	12.1667	173	152	164	11174	9651	10969	13403	14493	14246	17331	16882	17565
	12.3333	181	158	168	11419	10007	11156	13568	14555	14330	17351	16872	17666
	12.5	195	161	174	11680	10309	11366	13689	14617	14401	17348	16849	17624
	12.6667	204	165	184	11905	10511	11569	13787	14740	14408	17390	16905	17658
	12.8333	221	169	190	12188	10713	11805	13907	14746	14523	17355	16861	17643
	13	232	175	200	12420	10986	12001	14069	14801	14524	17422	16928	17760
	13.1667	246	181	211	12703	11287	12259	14065	14844	14557	17407	16910	17773
	13.3333	258	188	223	12940	11546	12483	14150	14876	14571	17398	16873	17875
	13.5	273	194	235	13132	11800	12763	14227	14923	14633	17472	16966	17808
	13.6667	287	206	254	13402	12098	12978	14307	14903	14639	17459	17019	17891
	13.8333	296	209	265	13576	12310	13208	14320	14923	14681	17418	16941	17858
	14	314	220	281	13822	12552	13439	14354	15001	14727	17447	17050	17945
	14.1667	331	234	294	14065	12850	13596	14385	14973	14741	17483	17042	17948
	14.3333	349	242	310	14197	13062	13777	14449	14987	14766	17479	17054	17974
	14.5	372	257	327	14351	13295	13927	14435	14995	14745	17597	17024	18000
	14.6667	391	269	352	14469	13563	14122	14476	15045	14835	17569	17032	18000
	14.8333	415	287	373	14612	13734	14218	14505	15037	14867	17598	17033	18064
	15	434	300	403	14738	13991	14358	14566	15052	14867	17533	17077	18085
	15.1667	458	318	423	14809	14134	14481	14543	15084	14859	17646	17164	18096
	15.3333	475	336	453	14864	14328	14567	14588	15066	14935	17635	17153	18132
	15.5	506	362	482	14894	14483	14665	14587	15074	14926	17628	17124	18168
	15.6667	524	381	514	15006	14602	14703	14643	15066	14897	17748	17247	18162
	15.8333	549	401	545	15053	14741	14747	14617	15083	14917	17671	17256	18197
	16	573	426	578	15086	14821	14829	14642	15059	14925	17737	17283	18199
	16.1667	596	457	617	15122	14913	14865	14636	15105	14960	17732	17340	18278
	16.3333	631	491	650	15169	14974	14919	14651	15126	14956	17779	17322	18351
	16.5	661	530	693	15233	15033	14944	14657	15190	15021	17777	17305	18337
	16.6667	689	567	730	15254	15092	15011	14750	15135	14928	17783	17389	18363
	16.8333	715	612	766	15240	15142	15034	14746	15155	15025	17843	17388	18361
	17	751	648	809	15299	15200	15040	14736	15190	15008	17863	17349	18392
	17.1667	781	687	856	15338	15227	15095	14747	15161	15011	17911	17417	18432
	17.3333	816	739	906	15378	15370	15147	14823	15166	15056	17918	17402	18445
	17.5	854	784	955	15444	15450	15156	14822	15181	15072	17919	17492	18594
	17.6667	901	831	1004	15466	15455	15164	14814	15217	15046	17941	17388	18534
	17.8333	937	882	1058	15463	15483	15220	14854	15200	15051	17927	17473	18495
	18	981	933	1109	15528	15551	15241	14818	15247	15105	17924	17513	18583
	18.1667	1025	988	1165	15541	15587	15250	14800	15219	15069	17967	17542	18637
	18.3333	1074	1039	1205	15571	15630	15300	14868	15237	15112	17997	17518	18603
	18.5	1125	1086	1278	15609	15645	15341	14869	15268	15147	18010	17530	18674
	18.6667	1173	1147	1323	15671	15654	15365	14867	15298	15142	18028	17576	18632
	18.8333	1220	1206	1385	15683	15750	15372	14883	15278	15153	18001	17559	18661
	19	1273	1267	1445	15679	15802	15395	14899	15211	15125	18096	17532	18748
	19.1667	1331	1327	1504	15698	15798	15403	14901	15251	15082	18160	17599	18761
	19.3333	1382	1388	1567	15717	15807	15409	14941	15281	15092	18072	17632	18748
	19.5	1439	1468	1629	15688	15860	15461	14937	15288	15142	18073	17630	18790
	19.6667	1503	1534	1706	15744	15930	15465	14874	15288	15092	18106	17599	18835
	19.8333	1569	1610	1772	15745	15935	15537	14955	15285	15111	18211	17659	18811
	20	1629	1703	1854	15783	15992	15524	14949	15285	15132	18099	17678	18843
	20.1667	1700	1777	1915	15750	15974	15558	14950	15296	15112	18086	17637	18822
	20.3333	1770	1860	1991	15818	16031	15576	15004	15290	15112	18127	17731	18841
	20.5	1842	1955	2090	15806	15985	15577	14926	15262	15151	18188	17744	18974
	20.6667	1916	2041	2158	15800	16084	15572	14917	15264	15126	18149	17747	18934
	20.8333	2003	2137	2244	15828	16074	15610	14942	15286	15149	18202	17771	18966
	21	2071	2239	2350	15885	16114	15641	14943	15291	15153	18209	17728	18947
	21.1667	2161	2327	2430	15870	16146	15665	14956	15308	15119	18281	17697	18921
	21.3333	2255	2430	2523	15834	16158	15621	14980	15320	15163	18274	17739	18976
	21.5	2355	2537	2612	15881	16164	15646	14945	15296	15120	18290	17785	18975
	21.6667	2450	2653	2740	15878	16148	15676	14961	15311	15114	18311	17794	18968
	21.8333	2561	2763	2831	15861	16272	15634	14961	15255	15111	18283	17758	18977
	22	2684	2875	2936	15899	16221	15690	14968	15283	15134	18303	17802	19014
	22.1667	2795	2997	3046	15905	16199	15710	15017	15314	15127	18409	17848	19016
	22.3333	2928	3130	3165	15897	16261	15691	14998	15288	15108	18339	17831	19066
	22.5	3048	3272	3281	15955	16243	15694	14953	15268	15155	18347	17827	19153
	22.6667	3198	3402	3396	15917	16237	15691	14985	15290	15184	18379	17869	19091
	22.8333	3353	3550	3525	15941	16264	15746	14974	15263	15148	18369	17827	19114
	23	3490	3703	3660	15978	16269	15679	14990	15292	15183	18381	17861	19104
	23.1667	3640	3842	3792	15934	16264	15743	15014	15296	15180	18295	17784	19190
	23.3333	3809	3995	3915	15967	16313	15814	15011	15294	15112	18313	17891	19107
	23.5	3994	4159	4045	15947	16335	15763	14999	15322	15148	18383	17936	19159
	23.6667	4163	4301	4193	15981	16306	15808	14990	15303	15125	18333	17870	19130
	23.8333	4361	4481	4332	15942	16323	15781	15025	15344	15140	18412	17909	19188
	24	4572	4637	4476	15978	16329	15781	14994	15307	15154	18367	17897	19252
	24.1667	4790	4825	4602	16020	16308	15803	15038	15312	15158	18400	17947	19183
	24.3333	5010	4988	4749	16043	16319	15823	15026	15290	15151	18379	17920	19208
	24.5	5219	5196	4905	16016	16337	15804	15041	15347	15144	18376	17922	19251
	24.6667	5457	5362	5073	16008	16378	15797	15027	15365	15167	18457	17975	19227
	24.8333	5697	5581	5233	16008	16391	15795	15053	15279	15175	18474	17943	19251
	25	5941	5757	5399	16015	16387	15828	14979	15254	15172	18484	18046	19252
	25.1667	6206	5967	5552	16038	16362	15878	15067	15328	15139	18402	18030	19333
	25.3333	6463	6169	5727	16036	16371	15856	15030	15260	15146	18404	17986	19229
	25.5	6733	6371	5893	16038	16383	15834	15033	15349	15134	18443	17977	19251
	25.6667	7040	6587	6086	16028	16369	15837	15064	15350	15120	18499	18010	19357
	25.8333	7326	6790	6257	16030	16399	15868	15033	15329	15165	18398	17976	19303
	26	7694	6940	6428	16055	16425	15878	15036	15316	15159	18449	17973	19353
	26.1667	8034	7153	6601	16028	16412	15814	15044	15321	15210	18479	18069	19349
	26.3333	8418	7283	6767	16061	16394	15867	15010	15314	15142	18460	18022	19288
	26.5	8791	7449	6938	16030	16387	15848	15029	15282	15149	18528	18002	19236
	26.6667	9202	7657	7092	16057	16414	15922	15058	15340	15179	18496	18042	19335
	26.8333	9477	7907	7220	16048	16390	15898	15064	15309	15195	18521	18015	19327
	27	9726	8173	7336	16073	16445	15936	15026	15291	15142	18531	17965	19337
	27.1667	9933	8463	7474	16006	16407	15873	15010	15304	15154	18512	17992	19298
	27.3333	10133	8732	7599	16097	16435	15869	15029	15299	15156	18470	18021	19266
	27.5	10452	9056	7835	15998	16396	15863	15041	15304	15190	18460	17986	19318
	27.6667	10691	9382	8069	16045	16403	15869	15043	15288	15161	18497	17972	19251
	27.8333	11057	9644	8277	16113	16450	15914	15076	15275	15170	18487	17976	19398
	28	11281	9840	8553	16072	16406	15878	15043	15304	15163	18484	17935	19323
	28.1667	11493	10052	8764	16076	16442	15941	15049	15278	15160	18447	17905	19369
	28.3333	11660	10273	9015	16042	16439	15950	15056	15322	15191	18477	17936	19354
	28.5	11836	10541	9234	16033	16453	15902	15051	15255	15126	18446	17876	19357
	28.6667	11965	10897	9470	16008	16441	15888	15031	15287	15132	18508	17978	19367
	28.8333	12074	11230	9727	16002	16406	15902	15026	15242	15146	18413	17907	19311
	29	12147	11593	10064	16068	16459	15950	15052	15236	15149	18426	17935	19342
	29.1667	12295	11957	10324	16078	16438	15952	15093	15285	15136	18460	17952	19371
	29.3333	12411	12105	10639	16058	16411	15880	15058	15285	15172	18436	17906	19249
	29.5	12461	12392	10937	16062	16490	15976	15060	15313	15178	18452	17890	19339
	29.6667	12496	12588	11174	16052	16440	15903	15074	15275	15123	18451	17929	19361
	29.8333	12575	12756	11422	16067	16459	15887	15068	15260	15144	18462	17943	19354
	30	12613	12842	11569	16064	16457	15941	15041	15301	15161	18472	17947	19330
	30.1667	12619	13025	11800	16080	16484	15861	15089	15259	15186	18418	17963	19319
	30.3333	12652	13137	11937	16063	16498	15943	15052	15287	15171	18439	17965	19396
	30.5	12731	13298	12100	16086	16467	15946	15088	15268	15162	18410	17946	19372
	30.6667	12779	13416	12296	16118	16442	15959	15060	15263	15203	18411	17968	19371
	30.8333	12849	13550	12367	16096	16446	15964	15118	15299	15161	18442	17873	19302
	31	12915	13743	12533	16075	16492	15947	15068	15289	15198	18428	17928	19336
	31.1667	12973	13842	12620	16119	16478	15955	15055	15310	15155	18452	17937	19392
	31.3333	12967	14049	12815	16109	16481	15945	15062	15310	15154	18475	17913	19320
	31.5	13114	14142	12894	16087	16469	15968	15056	15266	15140	18515	17969	19341
	31.6667	13183	14269	12979	16095	16475	15934	15042	15294	15149	18439	17983	19318
	31.8333	13243	14332	13126	16102	16465	15965	15064	15263	15149	18464	17917	19421
	32	13344	14382	13263	16076	16513	15956	15019	15272	15140	18443	17967	19394
	32.1667	13480	14526	13315	16141	16444	15949	15066	15268	15197	18472	17991	19396
	32.3333	13508	14672	13390	16130	16436	15938	15052	15283	15181	18448	17974	19371
	32.5	13631	14765	13451	16122	16483	15990	15032	15256	15191	18388	17997	19433
	32.6667	13736	14749	13551	16168	16474	15963	15067	15284	15151	18508	18072	19473
	32.8333	13800	14816	13668	16105	16460	15936	15036	15275	15161	18498	18041	19368
	33	13887	14982	13720	16124	16463	15995	15043	15279	15166	18523	17984	19402
	33.1667	13996	14993	13828	16138	16450	15972	15077	15297	15151	18519	18035	19419
	33.3333	14089	15069	13902	16105	16507	16012	15104	15263	15145	18481	18028	19391
	33.5	14172	15192	14003	16124	16456	15976	15055	15271	15199	18486	17962	19409
	33.6667	14222	15213	14061	16102	16486	16021	15068	15285	15146	18484	18002	19364
	33.8333	14320	15285	14093	16109	16439	15965	15114	15273	15192	18549	18038	19422
	34	14356	15303	14173	16157	16487	15988	15079	15293	15174	18486	18061	19449
	34.1667	14436	15402	14230	16132	16495	15903	15039	15252	15197	18503	18068	19424
	34.3333	14463	15449	14355	16117	16466	15966	15046	15301	15157	18498	18032	19466
	34.5	14501	15653	14445	16176	16515	16015	15083	15257	15120	18507	18063	19509
	34.6667	14594	15582	14495	16186	16465	15976	15074	15294	15194	18436	18022	19475
	34.8333	14601	15571	14534	16169	16509	15980	15029	15287	15191	18494	18030	19442
	35	14586	15647	14634	16119	16487	16014	15063	15225	15194	18568	18068	19545
	35.1667	14729	15641	14648	16132	16497	16016	15077	15269	15176	18450	18029	19549
	35.3333	14760	15673	14722	16131	16507	16018	15081	15300	15162	18456	18058	19543
	35.5	14741	15778	14807	16103	16512	16018	15094	15299	15152	18478	18095	19449
	35.6667	14783	15836	14902	16135	16489	16028	15085	15277	15190	18505	18092	19456
	35.8333	14877	15971	14960	16116	16494	16001	15088	15305	15161	18478	18133	19599
	36	14928	15951	14997	16205	16504	16011	15068	15329	15193	18562	18164	19548
	36.1667	14977	15992	15070	16200	16492	16033	15057	15289	15172	18645	18138	19630
	36.3333	14956	15985	15079	16148	16500	16015	15072	15336	15244	18548	18101	19588
	36.5	14975	16076	15225	16132	16527	16008	15065	15254	15200	18515	18134	19516
	36.6667	15039	16038	15305	16148	16522	16029	15025	15282	15208	18550	18108	19495
	36.8333	15080	16089	15314	16203	16481	15972	15069	15290	15215	18591	18100	19550
	37	15045	16209	15391	16171	16506	15971	15105	15258	15191	18487	18094	19573
	37.1667	15149	16214	15412	16180	16525	16002	15084	15296	15226	18503	18128	19505
	37.3333	15106	16245	15398	16156	16512	16013	15087	15291	15187	18497	18161	19547
	37.5	15136	16175	15451	16176	16521	15967	15056	15306	15194	18587	18135	19600
	37.6667	15205	16274	15488	16181	16542	15993	15093	15307	15179	18535	18135	19542
	37.8333	15206	16306	15547	16175	16479	16016	15094	15263	15203	18553	18139	19624
	38	15250	16318	15602	16164	16536	16017	15056	15285	15200	18578	18164	19651
	38.1667	15262	16284	15644	16143	16497	16029	15086	15309	15236	18563	18208	19634
	38.3333	15251	16260	15625	16174	16517	15996	15102	15282	15169	18626	18200	19616
	38.5	15313	16401	15757	16181	16521	16030	15067	15303	15221	18584	18150	19659
	38.6667	15373	16348	15771	16130	16477	16005	15016	15252	15152	18567	18125	19588
	38.8333	15357	16395	15777	16106	16490	15991	15032	15258	15176	18565	18127	19591
	39	15279	16416	15794	16116	16492	15974	15074	15239	15113	18555	18200	19591
	39.1667	15371	16395	15784	16121	16499	15954	14998	15224	15123	18548	18172	19550
	39.3333	15369	16396	15882	16123	16463	16018	15006	15215	15104	18578	18134	19558
	39.5	15432	16447	15859	16073	16425	15983	15038	15251	15088	18621	18152	19506
	39.6667	15395	16488	15971	16138	16434	15951	15065	15190	15180	18613	18174	19559
	39.8333	15381	16487	15957	16125	16509	16045	15021	15229	15151	18508	18151	19567
	40	15426	16491	15981	16086	16512	15976	15048	15218	15164	18510	18122	19505
	40.1667	15497	16449	15972	16091	16470	15980	14980	15212	15159	18566	18135	19627
	40.3333	15530	16517	16044	16124	16445	16045	15027	15201	15144	18517	18167	19578
	40.5	15541	16503	16067	16135	16462	15971	15052	15200	15147	18585	18159	19611
	40.6667	15482	16583	16113	16107	16486	16039	15072	15270	15170	18519	18234	19619
	40.8333	15526	16572	16076	16108	16515	16001	15050	15241	15197	18616	18245	19587
	41	15549	16576	16116	16089	16521	16049	15072	15224	15200	18556	18253	19645
	41.1667	15623	16623	16144	16157	16503	16022	15085	15279	15156	18587	18293	19675
	41.3333	15559	16560	16191	16139	16463	16050	15043	15268	15186	18619	18239	19710
	41.5	15568	16613	16231	16129	16467	16030	15042	15293	15170	18596	18249	19632
	41.6667	15652	16619	16212	16155	16511	16076	15130	15270	15225	18588	18298	19619
	41.8333	15609	16634	16194	16133	16466	16071	15035	15322	15171	18600	18279	19624
	42	15641	16652	16244	16138	16556	16023	15046	15307	15181	18579	18210	19683
	42.1667	15651	16682	16257	16196	16499	16099	15103	15294	15213	18645	18196	19668
	42.3333	15702	16683	16284	16123	16493	16069	15135	15302	15182	18571	18208	19678
	42.5	15713	16735	16382	16133	16497	16046	15100	15244	15222	18667	18296	19726
	42.6667	15671	16784	16355	16165	16521	16143	15121	15265	15223	18626	18329	19687
	42.8333	15720	16723	16341	16135	16515	16127	15103	15262	15246	18585	18279	19764
	43	15700	16742	16395	16157	16530	16124	15124	15289	15227	18645	18260	19767
	43.1667	15696	16792	16382	16161	16514	16083	15104	15290	15235	18600	18289	19670
	43.3333	15724	16773	16404	16163	16505	16171	15112	15318	15223	18659	18303	19694
	43.5	15739	16757	16396	16206	16532	16147	15126	15300	15233	18598	18312	19706
	43.6667	15767	16837	16463	16173	16565	16141	15154	15311	15225	18683	18322	19796
	43.8333	15775	16793	16467	16158	16542	16138	15172	15281	15243	18649	18369	19735
	44	15765	16854	16450	16154	16528	16141	15134	15302	15250	18609	18248	19726
	44.1667	15774	16814	16487	16221	16607	16181	15175	15349	15235	18619	18401	19738
	44.3333	15779	16813	16503	16201	16516	16129	15156	15344	15242	18665	18292	19714
	44.5	15768	16831	16541	16206	16544	16143	15178	15272	15212	18687	18323	19748
	44.6667	15777	16804	16555	16188	16573	16153	15141	15288	15265	18691	18346	19785
	44.8333	15846	16864	16603	16199	16583	16173	15181	15297	15294	18708	18366	19850
	45	15835	16913	16585	16191	16587	16211	15162	15363	15304	18674	18343	19802
	45.1667	15873	16928	16645	16188	16528	16188	15155	15367	15299	18753	18325	19835
	45.3333	15862	16934	16647	16209	16589	16193	15194	15302	15287	18667	18365	19875
	45.5	15856	16980	16650	16223	16533	16203	15160	15348	15345	18702	18357	19785
	45.6667	15832	16988	16686	16242	16593	16194	15207	15352	15307	18702	18392	19816
	45.8333	15965	16978	16708	16269	16612	16246	15163	15377	15321	18681	18428	19853
	46	15919	16984	16715	16242	16547	16209	15188	15354	15310	18713	18403	19822
	46.1667	15892	16988	16730	16220	16585	16267	15158	15386	15293	18702	18392	19898
	46.3333	15944	17078	16762	16223	16586	16244	15188	15401	15344	18663	18395	19830
	46.5	15951	17087	16801	16252	16602	16257	15207	15404	15318	18693	18382	19832
	46.6667	15895	17085	16799	16209	16563	16243	15200	15419	15360	18697	18406	19840
	46.8333	15943	17095	16794	16210	16572	16171	15173	15388	15341	18734	18431	19877
	47	15972	17039	16736	16231	16640	16278	15234	15417	15359	18759	18439	19904
	47.1667	16044	17100	16846	16216	16560	16294	15245	15416	15337	18679	18420	19897
	47.3333	16067	17089	16808	16215	16571	16280	15226	15384	15364	18680	18417	19821
	47.5	16113	17060	16836	16254	16653	16298	15231	15358	15313	18795	18408	19897
	47.6667	16076	17050	16850	16245	16580	16270	15210	15414	15358	18731	18460	19908
	47.8333	16116	17113	16813	16242	16606	16247	15213	15419	15384	18761	18466	19912
	48	16144	17115	16833	16292	16619	16278	15257	15450	15382	18689	18459	19883
	48.1667	16191	17122	16849	16220	16645	16285	15293	15438	15371	18720	18473	19976
	48.3333	16231	17149	16863	16217	16632	16290	15285	15435	15348	18742	18420	19881
	48.5	16212	17145	16883	16256	16681	16321	15249	15466	15406	18743	18458	19865
	48.6667	16194	17141	16854	16306	16636	16284	15240	15416	15393	18834	18419	19904
	48.8333	16244	17142	16861	16296	16616	16363	15228	15433	15379	18724	18492	19924
	49	16257	17211	16878	16230	16644	16329	15296	15430	15346	18820	18505	19958
	49.1667	16284	17150	16879	16284	16647	16361	15278	15449	15364	18809	18463	20003
	49.3333	16382	17208	16894	16252	16634	16298	15255	15417	15412	18764	18533	19984
	49.5	16355	17167	16891	16265	16622	16328	15301	15450	15396	18783	18519	20029
	49.6667	16341	17149	16860	16272	16623	16305	15227	15388	15395	18806	18517	20016
	49.8333	16395	17171	16871	16286	16672	16336	15266	15427	15374	18842	18502	20001
	50	16382	17169	16892	16300	16656	16372	15312	15447	15378	18829	18565	19918
	50.1667	16404	17238	16939	16197	16657	16301	15286	15419	15376	18756	18491	19978
	50.3333	16396	17228	16939	16264	16693	16374	15271	15488	15408	18813	18501	20006
	50.5	16463	17217	16934	16249	16671	16334	15308	15458	15374	18824	18482	19973
	50.6667	16467	17267	16993	16298	16645	16325	15290	15448	15430	18784	18544	19934
	50.8333	16450	17202	16946	16344	16702	16379	15298	15479	15434	18775	18497	20071
	51	16487	17299	16917	16340	16713	16384	15330	15493	15442	18833	18540	20031
	51.1667	16503	17254	16987	16338	16720	16420	15320	15507	15457	18839	18504	19977
	51.3333	16541	17251	16994	16393	16715	16411	15360	15521	15456	18767	18573	19997
	51.5	16555	17285	16984	16350	16798	16455	15339	15566	15471	18794	18530	19988
	51.6667	16603	17260	17024	16338	16729	16434	15349	15527	15470	18803	18517	20024
	51.8333	16585	17316	17024	16313	16731	16460	15362	15586	15499	18775	18590	20111
	52	16645	17326	16958	16308	16764	16439	15375	15577	15486	18793	18540	20014
	52.1667	16647	17295	16995	16336	16754	16409	15383	15527	15474	18763	18551	20097
	52.3333	16650	17287	17040	16337	16758	16426	15371	15535	15469	18745	18514	20041
	52.5	16686	17331	17031	16417	16743	16511	15366	15516	15486	18813	18624	20057
	52.6667	16708	17330	17072	16408	16743	16456	15391	15528	15525	18801	18550	20031
	52.8333	16715	17390	17035	16374	16775	16439	15381	15570	15487	18766	18620	20103
	53	16730	17386	17000	16392	16763	16464	15411	15529	15453	18788	18610	20131
	53.1667	16762	17330	17067	16390	16768	16484	15342	15554	15495	18789	18611	20092
	53.3333	16801	17414	17049	16397	16763	16478	15385	15572	15475	18800	18566	20162
	53.5	16799	17299	17009	16399	16755	16457	15395	15575	15499	18740	18489	20077
	53.6667	16794	17373	17099	16369	16753	16451	15389	15579	15505	18821	18659	20134
	53.8333	16736	17332	17072	16415	16798	16487	15404	15549	15521	18808	18561	20146
	54	16846	17360	17048	16420	16734	16551	15424	15568	15523	18787	18655	20142
	54.1667	16808	17311	17042	16389	16793	16513	15406	15596	15537	18847	18615	20167
	54.3333	16836	17414	16997	16429	16758	16567	15413	15560	15538	18851	18603	20153
	54.5	16850	17379	17129	16391	16794	16531	15445	15570	15556	18883	18635	20214
	54.6667	16813	17377	17015	16377	16817	16539	15419	15587	15533	18835	18653	20210
	54.8333	16833	17353	17084	16402	16792	16573	15448	15615	15550	18817	18727	20196
	55	16849	17420	17052	16447	16756	16549	15433	15602	15560	18812	18688	20246
	55.1667	16863	17370	17086	16433	16835	16541	15409	15636	15562	18917	18630	20160
	55.3333	16883	17310	17058	16420	16813	16563	15422	15624	15561	18940	18690	20189
	55.5	16854	17384	17107	16458	16794	16544	15504	15606	15535	18807	18645	20179
	55.6667	16861	17377	17102	16431	16802	16606	15458	15635	15538	18863	18669	20237
	55.8333	16878	17417	17114	16469	16833	16495	15457	15641	15570	18888	18671	20217
	56	16879	17418	17071	16412	16846	16578	15424	15619	15540	18883	18671	20199
	56.1667	16894	17407	17053	16436	16807	16596	15467	15625	15579	18870	18696	20251
	56.3333	16891	17361	17106	16429	16779	16615	15458	15589	15545	18810	18662	20210
	56.5	16860	17369	16998	16473	16859	16549	15413	15627	15571	18918	18661	20253
	56.6667	16871	17292	17024	16459	16823	16584	15461	15631	15582	18870	18662	20228
	56.8333	16892	17383	17096	16464	16838	16606	15470	15625	15611	18850	18705	20313
	57	16939	17400	17140	16402	16796	16571	15445	15620	15612	18965	18741	20237
	57.1667	16939	17355	17063	16406	16876	16643	15497	15662	15571	18835	18721	20177
	57.3333	16934	17420	17055	16466	16849	16620	15501	15648	15586	18907	18761	20336
	57.5	16993	17417	17129	16419	16866	16615	15468	15624	15560	18904	18748	20287
	57.6667	16946	17398	17163	16396	16857	16560	15457	15601	15576	18860	18705	20289
	57.8333	16917	17434	17150	16434	16803	16525	15486	15653	15536	18848	18679	20261
	58	16987	17430	17131	16471	16818	16592	15498	15623	15604	18890	18737	20258
	58.1667	16994	17438	17106	16439	16836	16675	15463	15631	15598	18828	18791	20328
	58.3333	16984	17423	17136	16403	16867	16616	15480	15633	15586	18895	18739	20300
	58.5	17024	17365	17166	16418	16852	16572	15495	15668	15589	18832	18658	20300
	58.6667	17024	17426	17119	16424	16885	16629	15480	15660	15606	18933	18697	20306
	58.8333	16958	17357	17197	16486	16855	16624	15543	15635	15551	18913	18704	20297
	59	16995	17487	17147	16446	16858	16627	15512	15674	15550	18906	18750	20301
	59.1667	17040	17440	17154	16474	16858	16661	15495	15667	15596	18978	18844	20321
	59.3333	17031	17359	17128	16478	16878	16595	15501	15683	15607	18900	18672	20314
	59.5	17072	17328	17167	16470	16895	16633	15548	15674	15613	18902	18742	20315
	59.6667	17035	17443	17130	16424	16871	16619	15476	15670	15607	18895	18674	20299
	59.8333	17000	17450	17115	16432	16887	16655	15495	15641	15644	18850	18644	20259
	60	17067	17373	17150	16470	16895	16672	15495	15681	15604	18923	18777	20309
	60.1667	17049	17398	17140	16477	16891	16641	15529	15650	15608	18890	18678	20326
	60.3333	17009	17376	17150	16486	16893	16629	15538	15697	15606	18859	18716	20266
	60.5	17099	17371	17145	16436	16882	16637	15532	15694	15608	18865	18772	20328
	60.6667	17072	17475	17165	16486	16882	16732	15538	15696	15646	18880	18790	20278
	60.8333	17048	17439	17115	16464	16874	16695	15551	15689	15653	18929	18756	20203
	61	17042	17409	17185	16498	16897	16641	15537	15686	15626	18870	18700	20290
	61.1667	16997	17449	17177	16499	16909	16711	15538	15709	15626	18923	18722	20274
	61.3333	17129	17459	17185	16492	16899	16729	15550	15698	15662	18879	18685	20341
	61.5	17015	17428	17151	16504	16862	16656	15535	15662	15630	18876	18834	20294
	61.6667	17084	17460	17236	16523	16898	16703	15573	15727	15626	18901	18803	20321
	61.8333	17052	17428	17173	16483	16902	16681	15584	15683	15596	18894	18835	20384
	62	17086	17412	17148	16535	16900	16723	15583	15716	15650	18931	18857	20337
	62.1667	17058	17505	17195	16492	16885	16706	15540	15715	15661	18883	18810	20330
	62.3333	17107	17490	17176	16507	16886	16711	15579	15689	15659	18911	18788	20322
	62.5	17102	17447	17199	16540	16934	16742	15552	15667	15663	18908	18752	20351
	62.6667	17114	17492	17201	16514	16958	16711	15564	15718	15681	18904	18837	20402
	62.8333	17071	17420	17201	16507	16952	16767	15571	15746	15641	18881	18843	20387
	63	17053	17422	17265	16563	16966	16788	15650	15706	15706	18895	18840	20371
	63.1667	17106	17479	17244	16517	16928	16752	15541	15764	15690	18959	18776	20386
	63.3333	16998	17436	17206	16572	16931	16726	15610	15749	15668	18931	18856	20403
	63.5	17024	17490	17207	16547	17021	16729	15578	15792	15701	18887	18820	20410
	63.6667	17096	17442	17281	16524	16929	16804	15614	15799	15723	18931	18809	20412
	63.8333	17140	17492	17252	16558	16983	16761	15619	15784	15703	18932	18878	20332
	64	17063	17402	17186	16546	16956	16782	15593	15770	15749	18965	18882	20435
	64.1667	17055	17462	17231	16568	16951	16789	15617	15741	15680	18958	18841	20389
	64.3333	17129	17469	17198	16549	16960	16822	15624	15775	15781	18930	18849	20381
	64.5	17163	17515	17240	16550	16982	16799	15644	15806	15744	18868	18835	20352
	64.6667	17150	17576	17254	16555	16973	16820	15676	15803	15708	18891	18889	20366
	64.8333	17131	17527	17286	16591	17001	16801	15634	15775	15717	18936	18855	20380
	65	17106	17513	17323	16541	16992	16841	15654	15738	15730	18905	18811	20400
	65.1667	17136	17556	17282	16579	16992	16840	15623	15768	15689	18905	18839	20391
	65.3333	17166	17521	17298	16612	17001	16785	15659	15805	15755	18942	18832	20425
	65.5	17119	17505	17295	16651	16988	16774	15673	15809	15697	18949	18833	20347
	65.6667	17197	17544	17292	16578	16963	16847	15673	15820	15753	18935	18869	20446
	65.8333	17147	17517	17300	16496	17017	16827	15596	15786	15779	18913	18839	20423
	66	17154	17568	17291	16582	17012	16856	15681	15756	15761	18956	18868	20450
	66.1667	17128	17496	17361	16627	16936	16877	15690	15831	15792	18951	18877	20389
	66.3333	17167	17465	17341	16595	17018	16833	15674	15808	15792	18873	18871	20384
	66.5	17130	17574	17323	16619	16975	16867	15670	15809	15781	18900	18863	20422
	66.6667	17115	17597	17350	16618	17054	16845	15716	15827	15802	18950	18871	20376
	66.8333	17150	17569	17330	16610	17053	16880	15660	15843	15760	18923	18876	20388
	67	17140	17537	17338	16631	17003	16958	15671	15792	15798	18946	18868	20476
	67.1667	17150	17593	17369	16598	17035	16890	15659	15862	15798	18995	18855	20444
	67.3333	17145	17548	17336	16665	17049	16914	15708	15821	15784	18903	18877	20402
	67.5	17165	17526	17364	16593	17040	16898	15742	15859	15784	18931	18842	20515
	67.6667	17115	17613	17374	16602	17056	16890	15709	15850	15782	18992	18901	20472
	67.8333	17185	17549	17290	16677	17050	16887	15690	15808	15823	18865	18869	20498
	68	17177	17487	17340	16619	17031	16955	15661	15818	15770	18989	18871	20519
	68.1667	17185	17527	17344	16626	17069	16919	15699	15853	15777	18946	18869	20455
	68.3333	17151	17570	17347	16631	17028	16866	15723	15874	15792	19031	18949	20484
	68.5	17236	17532	17373	16622	17069	16920	15713	15847	15816	18948	18852	20453
	68.6667	17173	17574	17325	16618	17051	16882	15725	15899	15803	18916	18925	20536
	68.8333	17148	17567	17342	16576	17048	16932	15723	15842	15828	18978	18951	20407
	69	17195	17573	17363	16591	17089	16857	15764	15920	15816	18990	18908	20497
	69.1667	17176	17501	17379	16599	17043	16935	15693	15807	15817	18980	18900	20501
	69.3333	17199	17524	17342	16628	17080	16958	15711	15892	15797	18990	18855	20482
	69.5	17201	17572	17415	16650	17091	16912	15700	15917	15821	18970	18929	20518
	69.6667	17201	17585	17407	16651	17058	16940	15697	15863	15883	18937	18955	20448

## Sheet: Fig 1e
PSMα3 kinetics in presence of low regime of seeds
		Seed concentration
	Time (h)	0 nM	0 nM	10 nM	10 nM	10 nM	50 nM	50 nM	50 nm	250 nM	250 nM	250 nM
	0	149	168	152	145	153	152	157	152	142	155	133
	0.00416667	148	164	149	144	151	148	154	148	142	149	131
	0.00833333	143	163	147	144	151	146	151	148	142	148	127
	0.0125	143	159	145	140	148	144	149	144	142	146	131
	0.0166667	141	155	146	140	147	142	146	147	139	147	127
	0.0208333	142	154	143	139	150	140	147	145	139	147	129
	0.025	142	151	142	141	146	141	145	142	139	143	134
	0.0291667	138	152	140	136	146	141	143	141	139	145	136
	0.0333333	137	147	142	136	144	137	144	140	138	141	135
	0.0375	134	147	137	137	143	137	142	140	136	143	138
	0.0416667	134	147	137	138	143	135	141	139	138	141	139
	0.0458333	135	146	140	136	143	136	143	140	139	141	138
	0.05	134	144	136	137	145	136	140	140	138	139	143
	0.0541667	130	141	135	136	146	135	141	138	145	142	151
	0.0583333	132	143	138	136	144	133	141	138	141	139	157
	0.0625	133	143	135	135	144	134	139	140	140	142	157
	0.0666667	133	138	135	134	140	135	140	137	143	142	166
	0.0708333	129	140	135	136	145	133	141	135	147	139	171
	0.075	127	139	133	134	141	135	138	141	145	141	179
	0.0791667	129	136	134	131	144	134	139	138	147	144	187
	0.0833333	128	137	134	132	144	132	138	134	149	145	199
	0.0875	128	134	133	132	142	133	139	138	150	143	212
	0.0916667	127	134	133	130	141	132	140	135	154	144	227
	0.0958333	125	136	135	129	143	133	136	139	158	143	245
	0.1	125	132	129	134	145	131	142	139	163	146	265
	0.104167	124	129	132	132	142	133	140	137	164	151	289
	0.108333	121	128	128	133	143	130	137	139	174	151	314
	0.1125	122	124	133	132	144	132	144	140	181	155	339
	0.116667	125	125	131	134	144	132	143	138	190	163	370
	0.120833	124	124	131	132	150	133	144	140	198	170	408
	0.125	128	123	134	131	149	133	151	141	210	180	449
	0.129167	126	125	135	137	147	138	153	144	228	187	492
	0.133333	124	119	133	137	146	141	156	146	246	204	543
	0.1375	127	119	137	138	150	143	161	150	267	223	594
	0.141667	127	121	135	140	155	145	165	155	292	247	649
	0.145833	122	125	137	143	154	148	172	159	324	280	709
	0.15	126	127	139	143	160	155	183	167	358	314	778
	0.154167	128	124	140	148	162	165	194	170	401	363	835
	0.158333	128	125	142	151	166	172	208	180	450	429	903
	0.1625	130	125	145	159	170	189	225	191	506	505	972
	0.166667	129	128	153	164	179	199	252	209	568	568	1033
	0.170833	135	128	155	174	188	223	282	228	632	642	1104
	0.175	136	129	161	185	198	249	313	246	698	693	1154
	0.179167	140	129	166	196	205	281	352	271	764	761	1211
	0.183333	145	136	178	208	215	314	408	301	837	847	1259
	0.1875	148	135	185	227	233	362	467	337	914	914	1306
	0.191667	153	137	201	241	250	420	534	383	991	990	1347
	0.195833	161	143	216	264	268	484	610	433	1060	1055	1377
	0.2	167	149	235	289	290	548	697	491	1134	1132	1413
	0.204167	174	153	259	310	315	627	792	551	1212	1214	1435
	0.208333	185	160	281	348	344	705	883	624	1266	1261	1463
	0.2125	200	169	312	378	383	788	977	693	1326	1324	1477
	0.216667	213	180	342	422	413	875	1071	769	1394	1397	1495
	0.220833	229	187	388	467	457	956	1163	842	1446	1442	1508
	0.225	252	206	426	511	501	1050	1250	923	1497	1495	1517
	0.229167	271	222	477	555	555	1121	1341	1000	1560	1564	1520
	0.233333	299	241	529	607	597	1201	1416	1070	1600	1602	1535
	0.2375	328	263	581	662	655	1271	1485	1139	1646	1648	1554
	0.241667	355	286	639	715	708	1330	1566	1206	1688	1686	1554
	0.245833	389	308	701	769	767	1398	1618	1275	1731	1732	1559
	0.25	427	345	758	807	819	1457	1670	1323	1757	1752	1562
	0.254167	463	379	822	867	875	1512	1724	1388	1798	1793	1569
	0.258333	502	414	874	917	932	1553	1776	1429	1832	1839	1574
	0.2625	544	458	943	969	993	1590	1810	1479	1861	1865	1579
	0.266667	588	494	997	1016	1037	1635	1846	1515	1888	1889	1580
	0.270833	625	532	1051	1064	1089	1668	1877	1559	1922	1909	1585
	0.275	665	579	1094	1105	1137	1698	1918	1601	1929	1924	1585
	0.279167	704	624	1140	1142	1192	1731	1939	1634	1963	1929	1590
	0.283333	744	670	1192	1189	1235	1757	1957	1666	1989	1935	1593
	0.2875	788	709	1244	1224	1276	1772	1985	1693	2014	1946	1596
	0.291667	818	763	1295	1270	1317	1790	2003	1709	2034	1952	1595
	0.295833	855	796	1329	1294	1349	1811	2014	1742	2052	1962	1603
	0.3	881	836	1357	1332	1389	1823	2038	1764	2067	1974	1602
	0.304167	923	870	1397	1352	1429	1842	2046	1785	2080	1975	1615
	0.308333	951	910	1420	1384	1456	1847	2054	1793	2095	1988	1618
	0.3125	981	955	1458	1417	1488	1845	2068	1820	2110	1992	1622
	0.316667	1007	986	1475	1435	1505	1855	2075	1829	2128	2007	1620
	0.320833	1029	1020	1514	1460	1537	1869	2093	1849	2144	2015	1624
	0.325	1060	1052	1526	1480	1558	1866	2105	1860	2152	2023	1625
	0.329167	1074	1074	1561	1512	1575	1880	2098	1881	2166	2028	1630
	0.333333	1099	1099	1564	1526	1590	1871	2102	1866	2180	2041	1636
	0.3375	1112	1122	1585	1541	1615	1886	2117	1889	2191	2047	1638
	0.341667	1130	1149	1598	1563	1640	1872	2120	1895	2194	2056	1640
	0.345833	1153	1170	1610	1575	1640	1880	2116	1915	2204	2054	1641
	0.35	1163	1195	1627	1591	1655	1881	2109	1916	2214	2076	1641
	0.354167	1179	1203	1645	1611	1678	1873	2130	1929	2221	2086	1652
	0.358333	1191	1225	1660	1630	1685	1888	2117	1934	2236	2092	1658
	0.3625	1199	1235	1671	1638	1702	1886	2120	1935	2237	2108	1667
	0.366667	1205	1245	1686	1647	1708	1889	2122	1944	2244	2122	1676
	0.370833	1210	1254	1690	1663	1715	1884	2123	1943	2244	2138	1685
	0.375	1236	1267	1693	1665	1726	1866	2132	1951	2262	2147	1707
	0.379167	1233	1277	1709	1678	1728	1877	2127	1952	2260	2156	1726
	0.383333	1239	1284	1716	1686	1743	1872	2131	1957	2272	2181	1722
	0.3875	1240	1288	1716	1682	1743	1866	2128	1963	2275	2195	1735
	0.391667	1255	1297	1715	1696	1753	1862	2128	1961	2281	2201	1748
	0.395833	1252	1303	1734	1715	1754	1860	2134	1959	2279	2210	1754
	0.4	1269	1305	1731	1718	1766	1853	2130	1970	2305	2219	1754
	0.404167	1263	1314	1736	1710	1770	1852	2115	1968	2300	2233	1769
	0.408333	1258	1310	1752	1728	1766	1844	2128	1975	2296	2252	1777
	0.4125	1276	1307	1742	1731	1772	1855	2116	1977	2309	2260	1796
	0.416667	1267	1309	1736	1739	1772	1832	2115	1987	2302	2274	1805
	0.420833	1269	1314	1755	1746	1775	1836	2119	1977	2322	2281	1806
	0.425	1266	1309	1756	1747	1775	1836	2116	1982	2322	2278	1814
	0.429167	1273	1314	1740	1742	1777	1822	2110	1988	2330	2292	1831
	0.433333	1271	1312	1749	1746	1775	1824	2120	1976	2349	2296	1858
	0.4375	1273	1312	1755	1762	1780	1816	2111	1995	2371	2316	1892
	0.441667	1263	1306	1754	1770	1787	1812	2115	1983	2392	2317	1903
	0.445833	1270	1306	1755	1772	1784	1795	2102	1977	2381	2346	1913
	0.45	1270	1310	1751	1763	1792	1803	2103	1979	2404	2341	1917
	0.454167	1273	1304	1759	1769	1778	1798	2099	1983	2394	2351	1938
	0.458333	1273	1308	1756	1770	1781	1787	2092	1969	2416	2369	1945
	0.4625	1265	1301	1757	1769	1783	1787	2093	1973	2439	2370	1967
	0.466667	1270	1299	1752	1780	1780	1774	2086	1975	2439	2378	1969
	0.470833	1261	1295	1752	1781	1778	1768	2078	1976	2427	2381	1995
	0.475	1256	1300	1755	1799	1778	1768	2087	1972	2439	2385	2002
	0.479167	1262	1294	1741	1813	1782	1763	2077	1972	2456	2396	2010
	0.483333	1259	1292	1737	1811	1775	1752	2079	1979	2446	2414	2036
	0.4875	1265	1291	1748	1813	1770	1748	2061	1972	2462	2414	2078
	0.491667	1264	1292	1733	1828	1783	1752	2064	1974	2498	2440	2099
	0.495833	1264	1287	1744	1821	1770	1727	2070	1979	2496	2459	2105
	0.5	1269	1273	1742	1824	1766	1724	2052	1974	2511	2461	2134
	0.504167	1263	1282	1731	1822	1776	1726	2052	1966	2512	2481	2154
	0.508333	1267	1278	1735	1818	1769	1721	2056	1974	2514	2492	2147
	0.5125	1285	1282	1739	1824	1760	1711	2049	1973	2537	2502	2171
												2178
												2191
												2198
												2225
												2239
												2235
												2248
												2264
												2278
												2293
												2318
												2327
												2341
												2361
												2398
												2414
												2446
												2437
												2446
												2470
												2455
												2476
												2473
												2458
												2489
												2484
												2498
												2509
												2539
												2545
												2551
												2563
												2573
												2597
												2614
												2636
												2637
												2659
												2683
												2691
												2700
												2714
												2729
												2730
												2731
												2741
												2734
												2760
												2757
												2760
												2773
												2768
												2783
												2778
												2774
												2788
												2800
												2800
												2814
												2827
												2823
												2853
												2851
												2880
												2872
												2885
												2898
												2905
												2914
												2919
												2922
												2930
												2931
												2926
												2952
												2920
												2946
												2941
												2949
												2953
												2954
												2964
												2966
												2970
												2979
												2985
												2993
												2989
												2999
												3007
												3019
												3006
												3022
												3018
												3001
												3010
												3015
												3017
												3006
												3023

## Sheet: Fig 1f
PSMβ1 kinetics in presence of low regime of seeds
		Seed concentration
	Time (h)	0 nM	0 nM	0 nM	10 nM	10 nM	10 nM	50 nM	50 nM	50 nM	100 nM	100 nM	100 nM
	0	752	783	781	738	737	756	804	801	817	829	868	799
	0.166667	746	737	753	742	712	739	774	767	790	807	837	774
	0.333333	718	726	733	712	709	723	765	746	791	808	825	770
	0.5	702	722	727	711	709	712	757	738	776	806	831	781
	0.666667	705	708	723	706	688	701	743	737	771	776	824	774
	0.833333	697	723	708	693	695	718	746	743	753	791	813	780
	1	674	712	711	688	699	707	736	740	751	812	837	791
	1.16667	695	710	713	692	696	708	733	731	750	800	821	772
	1.33333	685	727	717	687	677	695	743	719	747	784	830	775
	1.5	693	699	713	692	696	712	749	734	753	786	829	806
	1.66667	693	710	703	694	687	714	721	730	748	781	820	808
	1.83333	697	716	721	694	692	725	726	713	746	796	848	812
	2	694	713	710	700	686	694	736	727	749	794	840	814
	2.16667	700	719	713	683	681	705	732	731	744	787	833	808
	2.33333	680	714	715	691	681	699	740	735	757	792	832	818
	2.5	693	699	715	701	690	706	727	722	746	778	825	795
	2.66667	697	716	705	694	696	699	739	718	746	777	827	816
	2.83333	686	714	714	682	675	713	738	727	754	790	819	815
	3	687	721	707	673	701	696	727	707	743	781	821	816
	3.16667	690	710	719	684	690	699	729	725	739	789	830	822
	3.33333	689	707	720	681	674	705	741	720	749	789	818	879
	3.5	697	714	704	691	680	687	737	735	759	792	821	948
	3.66667	702	715	719	684	680	696	735	728	758	855	840	997
	3.83333	693	699	714	683	686	701	746	726	752	930	896	1035
	4	695	715	708	683	674	703	718	724	792	975	966	1061
	4.16667	694	706	715	687	673	688	730	728	859	1017	1013	1102
	4.33333	701	712	707	685	674	685	736	714	970	1064	1055	1117
	4.5	694	713	712	695	671	681	790	781	1019	1091	1104	1161
	4.66667	700	695	718	672	677	694	856	850	1055	1143	1118	1182
	4.83333	704	705	719	696	674	701	915	918	1132	1172	1130	1249
	5	704	725	717	694	676	691	986	970	1202	1185	1160	1269
	5.16667	697	711	724	677	674	687	1029	1036	1259	1225	1191	1308
	5.33333	700	734	717	692	678	699	1143	1112	1371	1229	1216	1307
	5.5	692	720	727	695	674	717	1215	1189	1399	1263	1258	1381
	5.66667	703	735	712	677	686	699	1293	1234	1434	1284	1286	1389
	5.83333	703	723	730	676	674	701	1354	1270	1493	1334	1317	1392
	6	701	710	718	686	687	700	1429	1325	1546	1346	1337	1421
	6.16667	685	737	730	691	675	703	1495	1380	1566	1387	1358	1445
	6.33333	706	731	725	682	719	696	1502	1444	1622	1391	1400	1456
	6.5	708	748	725	692	755	689	1578	1490	1647	1456	1437	1502
	6.66667	707	741	728	694	812	737	1630	1502	1676	1485	1476	1503
	6.83333	713	793	727	684	829	796	1664	1574	1733	1522	1502	1554
	7	745	855	739	724	875	826	1695	1612	1761	1545	1523	1537
	7.16667	813	897	738	780	926	854	1734	1633	1761	1583	1538	1563
	7.33333	862	914	754	842	967	893	1778	1686	1797	1618	1545	1590
	7.5	884	946	747	881	1009	961	1825	1715	1844	1617	1584	1612
	7.66667	925	966	767	935	1036	1022	1821	1762	1848	1653	1599	1617
	7.83333	943	1001	831	982	1088	1029	1853	1796	1900	1658	1629	1686
	8	964	1020	898	1038	1133	1069	1884	1794	1898	1689	1612	1667
	8.16667	984	1067	942	1096	1168	1120	1916	1855	1915	1700	1652	1692
	8.33333	1021	1082	958	1152	1200	1154	1926	1874	1955	1746	1630	1689
	8.5	1039	1096	995	1210	1244	1193	1959	1898	1962	1760	1676	1757
	8.66667	1059	1113	1045	1263	1253	1232	1946	1939	1970	1749	1696	1752
	8.83333	1076	1140	1076	1312	1284	1284	1977	1952	1991	1789	1715	1758
	9	1111	1168	1107	1377	1326	1329	2013	1965	2013	1793	1726	1739
	9.16667	1120	1181	1141	1409	1328	1356	2052	2029	2008	1809	1724	1782
	9.33333	1116	1155	1162	1420	1362	1370	2044	1991	2022	1862	1752	1802
	9.5	1109	1196	1176	1505	1391	1395	2053	2039	2019	1868	1779	1828
	9.66667	1154	1199	1196	1509	1420	1443	2075	2058	2020	1866	1761	1790
	9.83333	1181	1225	1207	1569	1466	1469	2096	2083	2054	1878	1801	1869
	10	1180	1249	1232	1581	1464	1484	2087	2108	2064	1905	1811	1898
	10.1667	1195	1257	1256	1611	1483	1505	2088	2141	2058	1939	1853	1917
	10.3333	1210	1249	1276	1652	1517	1552	2118	2126	2104	1947	1853	1892
	10.5	1240	1304	1302	1696	1538	1583	2149	2172	2091	1953	1860	1929
	10.6667	1236	1306	1328	1717	1549	1580	2125	2171	2121	1957	1865	1960
	10.8333	1235	1298	1290	1750	1581	1606	2130	2197	2122	1992	1867	1974
	11	1268	1335	1329	1765	1597	1621	2178	2178	2142	2004	1883	1984
	11.1667	1275	1331	1349	1749	1614	1671	2195	2234	2133	2019	1904	1973
	11.3333	1285	1359	1361	1785	1616	1698	2166	2224	2143	2047	1908	1964
	11.5	1295	1353	1346	1818	1644	1701	2172	2246	2133	2057	1916	1999
	11.6667	1306	1377	1362	1811	1660	1731	2204	2253	2156	2078	1921	2054
	11.8333	1313	1397	1374	1858	1680	1771	2213	2261	2175	2103	1941	2067
	12	1328	1393	1410	1883	1716	1769	2217	2314	2167	2125	1973	2075
	12.1667	1343	1398	1399	1897	1728	1795	2246	2338	2172	2111	1963	2076
	12.3333	1359	1410	1396	1916	1727	1785	2237	2319	2121	2094	1962	2059
	12.5	1338	1404	1387	1925	1760	1818	2239	2362	2182	2133	1978	2067
	12.6667	1361	1420	1413	1971	1790	1877	2291	2362	2200	2107	1972	2088
	12.8333	1372	1447	1423	2000	1822	1924	2270	2398	2240	2120	1969	2115
	13	1375	1466	1459	1984	1838	1908	2304	2450	2287	2142	2003	2146
	13.1667	1399	1477	1458	2002	1824	1909	2301	2461	2301	2163	2030	2164
	13.3333	1415	1474	1448	2039	1855	1941	2366	2462	2272	2204	2030	2177
	13.5	1387	1479	1453	2032	1862	1947	2312	2465	2293	2211	2038	2186
	13.6667	1418	1493	1449	2049	1878	1984	2314	2459	2279	2220	2043	2196
	13.8333	1436	1546	1470	2090	1895	2010	2340	2464	2259	2200	2066	2236
	14	1446	1543	1497	2035	1920	2016	2324	2499	2271	2262	2108	2219
	14.1667	1469	1550	1505	2094	1916	2051	2318	2512	2301	2264	2096	2282
	14.3333	1487	1546	1496	2078	1953	2052	2339	2538	2306	2296	2118	2257
	14.5	1490	1571	1527	2115	1945	2041	2393	2545	2321	2292	2140	2295
	14.6667	1465	1592	1541	2112	1967	2077	2369	2600	2345	2300	2122	2307
	14.8333	1510	1608	1541	2184	1999	2072	2404	2580	2350	2281	2142	2296
	15	1521	1615	1545	2171	2033	2123	2399	2588	2362	2311	2159	2342
	15.1667	1533	1610	1547	2197	2021	2120	2398	2632	2359	2351	2140	2325
	15.3333	1532	1632	1537	2206	2027	2158	2412	2645	2391	2358	2162	2334
	15.5	1552	1634	1593	2208	2076	2151	2420	2646	2413	2350	2181	2348
	15.6667	1548	1656	1581	2225	2063	2160	2404	2720	2386	2376	2156	2371
	15.8333	1566	1644	1588	2248	2057	2195	2447	2728	2437	2365	2193	2395
	16	1587	1670	1595	2276	2107	2198	2454	2742	2434	2376	2237	2405
	16.1667	1616	1696	1632	2282	2131	2191	2439	2748	2458	2406	2202	2376
	16.3333	1608	1727	1647	2277	2133	2266	2470	2776	2474	2390	2229	2404
	16.5	1634	1744	1670	2306	2173	2249	2484	2798	2459	2433	2232	2393
	16.6667	1648	1726	1673	2322	2139	2266	2484	2803	2479	2394	2234	2422
	16.8333	1687	1744	1674	2343	2200	2255	2501	2879	2535	2431	2240	2430
	17	1701	1814	1691	2375	2205	2320	2490	2894	2562	2440	2271	2424
	17.1667	1695	1807	1723	2403	2251	2299	2533	2917	2536	2438	2285	2460
	17.3333	1701	1812	1714	2386	2254	2330	2506	2918	2545	2477	2283	2468
	17.5	1705	1796	1713	2378	2232	2345	2561	2905	2566	2497	2291	2479
	17.6667	1688	1766	1683	2388	2270	2368	2538	2888	2551	2513	2294	2529
	17.8333	1693	1801	1702	2432	2285	2375	2563	2914	2536	2509	2324	2518
	18	1719	1806	1699	2439	2322	2406	2521	2922	2541	2521	2327	2548
	18.1667	1729	1813	1732	2440	2314	2395	2540	2949	2555	2562	2347	2564
	18.3333	1760	1803	1720	2483	2358	2440	2560	2965	2609	2588	2333	2553
	18.5	1776	1835	1754	2482	2360	2431	2578	3018	2595	2559	2346	2567
	18.6667	1772	1851	1757	2503	2366	2427	2589	3009	2618	2626	2394	2602
	18.8333	1795	1866	1766	2516	2386	2468	2573	3030	2654	2614	2400	2601
	19	1820	1853	1768	2509	2417	2488	2580	3054	2638	2610	2410	2633
	19.1667	1817	1907	1775	2520	2451	2530	2614	3089	2640	2655	2429	2650
	19.3333	1828	1902	1792	2556	2438	2520	2620	3091	2644	2680	2435	2684
	19.5	1867	1916	1832	2560	2474	2514	2636	3119	2671	2699	2487	2696
	19.6667	1880	1916	1836	2604	2463	2562	2655	3158	2715	2669	2468	2710
	19.8333	1866	1946	1836	2608	2478	2548	2665	3193	2719	2724	2522	2742
	20	1900	1932	1848	2621	2527	2569	2668	3197	2732	2779	2520	2718
	20.1667	1894	1960	1866	2634	2493	2581	2692	3253	2730	2779	2543	2726
	20.3333	1907	1970	1865	2651	2546	2598	2710	3239	2762	2809	2558	2742
	20.5	1952	2000	1901	2664	2549	2652	2712	3290	2798	2804	2582	2793
	20.6667	1977	2040	1905	2704	2585	2664	2731	3278	2786	2794	2604	2792
	20.8333	1965	2055	1941	2674	2556	2652	2769	3328	2835	2843	2589	2802
	21	1987	2045	1923	2718	2602	2670	2750	3355	2841	2881	2652	2835
	21.1667	1991	2080	1954	2767	2650	2706	2780	3374	2854	2895	2656	2861
	21.3333	2036	2075	1951	2754	2625	2697	2778	3403	2876	2912	2660	2861
	21.5	2013	2103	1994	2783	2656	2724	2790	3427	2894	2919	2662	2851
	21.6667	2052	2088	1990	2798	2668	2744	2785	3436	2926	2965	2700	2892
	21.8333	2071	2129	2009	2776	2712	2779	2827	3459	2948	2976	2710	2938
	22	2079	2153	2055	2814	2710	2767	2852	3500	2949	2988	2737	2947
	22.1667	2112	2156	2027	2838	2727	2791	2850	3531	3003	3017	2759	2939
	22.3333	2105	2179	2051	2809	2729	2791	2847	3560	2989	2988	2754	2929
	22.5	2107	2190	2079	2868	2755	2822	2892	3608	3063	3050	2788	2945
	22.6667	2144	2226	2064	2860	2764	2828	2937	3603	3071	3063	2819	3004
	22.8333	2146	2215	2088	2930	2788	2820	2918	3619	3119	3106	2817	2994
	23	2202	2248	2123	2913	2804	2841	2964	3647	3104	3112	2860	3037
	23.1667	2194	2255	2127	2960	2827	2901	2946	3680	3128	3137	2876	3045
	23.3333	2229	2271	2159	2991	2836	2876	2992	3725	3171	3133	2889	3036
	23.5	2241	2296	2154	2981	2821	2885	2995	3724	3178	3184	2914	3044
	23.6667	2269	2318	2168	3000	2876	2919	3020	3757	3223	3206	2929	3095
	23.8333	2297	2318	2191	3006	2864	2921	3056	3755	3252	3219	2964	3076
	24	2273	2351	2210	3031	2893	2931	3052	3802	3266	3262	3003	3088
	24.1667	2289	2345	2240	3059	2897	2924	3069	3855	3308	3234	3001	3129
	24.3333	2335	2371	2268	3067	2901	2931	3102	3848	3320	3285	3006	3139
	24.5	2347	2417	2293	3108	2939	2960	3120	3879	3386	3306	3040	3153
	24.6667	2388	2416	2292	3155	2936	2972	3108	3904	3376	3313	3024	3174
	24.8333	2377	2419	2282	3118	2954	3023	3151	3932	3399	3346	3088	3148
	25	2426	2450	2321	3184	2993	3030	3167	3915	3445	3357	3075	3164
	25.1667	2438	2450	2346	3143	2994	3010	3207	3927	3457	3407	3068	3183
	25.3333	2446	2483	2359	3209	3012	3009	3169	3945	3478	3418	3104	3210
	25.5	2461	2530	2351	3199	2963	3037	3226	4004	3519	3392	3146	3224
	25.6667	2489	2531	2395	3237	3006	3045	3201	4049	3538	3403	3149	3252
	25.8333	2507	2527	2409	3273	3034	3071	3241	4063	3574	3445	3179	3230
	26	2500	2584	2425	3217	3052	3085	3268	4051	3607	3445	3171	3273
	26.1667	2510	2584	2438	3253	3029	3113	3279	4105	3628	3507	3185	3279
	26.3333	2550	2625	2469	3278	3088	3097	3271	4139	3643	3474	3194	3245
	26.5	2563	2635	2498	3277	3067	3136	3342	4137	3647	3520	3212	3269
	26.6667	2578	2683	2506	3317	3083	3137	3354	4155	3682	3555	3233	3299
	26.8333	2603	2701	2533	3355	3106	3134	3401	4136	3689	3517	3263	3347
	27	2644	2680	2535	3343	3098	3156	3364	4180	3768	3557	3251	3337
	27.1667	2612	2718	2548	3360	3123	3141	3364	4236	3759	3581	3300	3348
	27.3333	2700	2715	2590	3372	3134	3174	3379	4248	3791	3575	3339	3374
	27.5	2675	2754	2598	3371	3129	3188	3404	4282	3808	3589	3314	3356
	27.6667	2720	2786	2612	3382	3163	3216	3439	4266	3826	3614	3366	3397
	27.8333	2721	2806	2624	3413	3156	3219	3466	4292	3868	3606	3347	3377
	28	2734	2831	2640	3397	3138	3237	3486	4317	3864	3657	3352	3403
	28.1667	2762	2850	2653	3419	3199	3264	3460	4319	3907	3667	3406	3403
	28.3333	2772	2905	2678	3495	3197	3286	3517	4347	3941	3653	3424	3405
	28.5	2766	2872	2712	3461	3162	3257	3474	4355	3957	3668	3465	3422
	28.6667	2788	2945	2714	3473	3219	3259	3491	4359	3986	3660	3422	3429
	28.8333	2801	2941	2729	3509	3205	3280	3510	4361	3994	3667	3449	3433
	29	2855	2981	2795	3515	3200	3311	3541	4371	4037	3693	3475	3451
	29.1667	2874	2991	2765	3497	3195	3318	3563	4423	4018	3731	3473	3462
	29.3333	2856	3003	2786	3530	3212	3307	3595	4430	4078	3728	3490	3487
	29.5	2892	3029	2784	3546	3229	3332	3574	4461	4074	3741	3516	3488
	29.6667	2884	3056	2837	3576	3215	3302	3615	4432	4077	3749	3517	3500
	29.8333	2917	3088	2812	3560	3243	3308	3635	4469	4133	3762	3518	3522
	30	2921	3112	2842	3598	3238	3324	3614	4508	4134	3794	3530	3526
	30.1667	2927	3112	2848	3605	3265	3363	3644	4493	4185	3830	3552	3550
	30.3333	2971	3121	2874	3584	3279	3354	3644	4499	4198	3818	3570	3516
	30.5	2963	3134	2888	3609	3299	3364	3648	4521	4249	3810	3597	3574
	30.6667	3006	3173	2926	3617	3298	3361	3679	4494	4265	3834	3597	3536
	30.8333	3035	3212	2928	3586	3306	3394	3685	4532	4254	3831	3621	3526
	31	3009	3227	2955	3633	3338	3395	3670	4568	4265	3813	3615	3555
	31.1667	3020	3251	2944	3580	3334	3414	3733	4564	4300	3851	3628	3551
	31.3333	3048	3242	2969	3652	3305	3402	3687	4643	4323	3865	3659	3581
	31.5	3030	3259	2975	3633	3316	3406	3755	4634	4321	3877	3646	3571
	31.6667	3086	3319	2985	3640	3313	3420	3738	4632	4371	3882	3655	3563
	31.8333	3082	3346	3028	3614	3308	3411	3744	4608	4343	3906	3645	3591
	32	3071	3332	3024	3665	3325	3434	3739	4627	4314	3915	3700	3601
	32.1667	3088	3383	3019	3673	3342	3438	3783	4650	4376	3932	3709	3626
	32.3333	3103	3371	3034	3688	3379	3461	3766	4660	4408	3951	3687	3633
	32.5	3116	3378	3048	3686	3405	3467	3800	4642	4391	3944	3715	3624
	32.6667	3127	3419	3033	3719	3393	3434	3761	4681	4383	3911	3737	3618
	32.8333	3150	3409	3093	3688	3400	3466	3805	4726	4435	3955	3722	3606
	33	3129	3438	3122	3641	3368	3454	3806	4696	4442	3977	3767	3648
	33.1667	3170	3431	3120	3704	3361	3464	3815	4633	4427	3989	3769	3629
	33.3333	3150	3493	3102	3750	3392	3475	3790	4773	4478	3964	3790	3683
	33.5	3174	3483	3140	3760	3379	3467	3842	4709	4475	3987	3781	3659
	33.6667	3206	3515	3120	3722	3412	3455	3854	4742	4505	4024	3788	3691
	33.8333	3203	3496	3150	3748	3436	3489	3810	4747	4521	4004	3809	3681
	34	3196	3552	3144	3763	3398	3499	3845	4721	4537	4021	3776	3685
	34.1667	3183	3522	3163	3744	3424	3490	3833	4743	4554	4017	3824	3704
	34.3333	3216	3521	3131	3721	3398	3523	3842	4729	4533	4044	3820	3710
	34.5	3250	3544	3167	3750	3391	3491	3857	4747	4528	4040	3817	3700
	34.6667	3210	3601	3190	3726	3395	3542	3850	4772	4597	4056	3846	3746
	34.8333	3224	3568	3239	3764	3457	3496	3876	4765	4588	4094	3851	3721
	35	3227	3619	3174	3785	3415	3517	3833	4785	4575	4105	3856	3738
	35.1667	3260	3646	3187	3788	3406	3531	3866	4795	4592	4083	3880	3747
	35.3333	3231	3635	3211	3804	3421	3544	3880	4798	4607	4137	3870	3747
	35.5	3259	3668	3230	3783	3468	3589	3880	4804	4644	4090	3884	3737
	35.6667	3265	3659	3229	3798	3466	3559	3889	4832	4675	4097	3891	3751
	35.8333	3276	3661	3272	3756	3470	3550	3881	4815	4644	4078	3905	3760
	36	3317	3694	3286	3766	3464	3572	3916	4818	4662	4099	3903	3751
	36.1667	3321	3723	3240	3805	3477	3557	3917	4830	4667	4113	3925	3740
	36.3333	3307	3701	3251	3792	3481	3569	3899	4851	4681	4147	3924	3781
	36.5	3292	3728	3264	3790	3490	3574	3908	4813	4727	4098	3927	3749
	36.6667	3321	3758	3288	3814	3484	3578	3934	4858	4697	4104	3933	3765
	36.8333	3316	3747	3315	3857	3455	3618	3893	4860	4700	4128	3915	3757
	37	3324	3761	3292	3815	3471	3601	3909	4824	4698	4167	3938	3784
	37.1667	3309	3781	3328	3783	3473	3609	3926	4848	4744	4157	3981	3815
	37.3333	3339	3787	3327	3819	3461	3596	3921	4870	4702	4160	3985	3794
	37.5	3332	3818	3329	3847	3466	3614	3915	4868	4691	4190	3964	3812
	37.6667	3331	3782	3307	3863	3481	3653	3926	4863	4764	4145	3968	3799
	37.8333	3363	3791	3319	3869	3515	3633	3899	4872	4790	4169	4000	3808
	38	3357	3848	3323	3834	3524	3621	3889	4854	4734	4165	4006	3817
	38.1667	3334	3810	3349	3841	3482	3623	3957	4850	4757	4193	3996	3832
	38.3333	3357	3833	3340	3831	3501	3606	3956	4885	4768	4147	3992	3812
	38.5	3324	3873	3344	3831	3469	3603	3911	4876	4752	4177	4014	3816
	38.6667	3313	3801	3361	3844	3497	3597	3918	4865	4761	4227	4010	3792
	38.8333	3341	3844	3362	3808	3498	3610	3995	4914	4819	4227	4016	3828
	39	3347	3834	3363	3859	3499	3618	3917	4918	4766	4182	4026	3840
	39.1667	3332	3866	3373	3859	3540	3602	3934	4899	4797	4177	4019	3827
	39.3333	3403	3889	3383	3826	3535	3586	3966	4898	4821	4200	4000	3846
	39.5	3358	3892	3365	3882	3520	3609	3952	4899	4831	4266	4024	3812
	39.6667	3353	3905	3383	3849	3544	3625	3931	4903	4826	4216	4056	3843
	39.8333	3371	3899	3377	3869	3522	3636	3940	4896	4806	4255	4038	3868
	40	3356	3872	3383	3878	3587	3620	3966	4916	4843	4244	4080	3858
	40.1667	3390	3947	3365	3875	3558	3588	3938	4902	4863	4259	4071	3848
	40.3333	3377	3904	3389	3863	3533	3623	3954	4889	4819	4229	4070	3841
	40.5	3390	3942	3377	3896	3542	3608	3932	4913	4855	4244	4084	3851
	40.6667	3385	3917	3339	3855	3540	3622	3962	4900	4865	4283	4110	3890
	40.8333	3404	3950	3418	3899	3559	3622	3955	4940	4854	4266	4068	3851
	41	3437	3930	3390	3873	3558	3634	3953	4910	4879	4231	4103	3893
	41.1667	3423	3932	3435	3887	3578	3639	3952	4937	4922	4285	4112	3886
	41.3333	3386	3981	3414	3855	3561	3587	3941	4906	4827	4303	4089	3866
	41.5	3423	3979	3406	3861	3573	3597	3948	4910	4885	4260	4115	3874
	41.6667	3379	3951	3434	3886	3579	3626	3962	4933	4908	4261	4102	3849
	41.8333	3406	3955	3411	3865	3545	3634	3975	4918	4916	4289	4124	3881
	42	3447	3959	3447	3893	3558	3639	3915	4924	4876	4301	4136	3877
	42.1667	3413	3984	3414	3884	3538	3618	4010	4933	4906	4277	4123	3889
	42.3333	3392	3968	3411	3880	3553	3666	3956	4939	4902	4332	4128	3866
	42.5	3398	3974	3407	3901	3572	3642	3941	4951	4896	4277	4131	3901
	42.6667	3386	3994	3446	3906	3573	3643	3976	4884	4891	4292	4117	3909
	42.8333	3421	3946	3424	3899	3564	3615	3953	4957	4936	4292	4169	3868
	43	3417	3999	3407	3911	3577	3650	3974	4944	4882	4310	4120	3910
	43.1667	3409	4010	3428	3893	3574	3666	3987	4949	4898	4321	4149	3888
	43.3333	3395	3956	3435	3916	3564	3621	3979	4937	4913	4332	4141	3942
	43.5	3407	3997	3463	3885	3586	3627	3974	4960	4960	4359	4164	3890
	43.6667	3409	3987	3428	3859	3612	3663	3971	4989	4930	4340	4151	3909
	43.8333	3435	4025	3447	3935	3609	3637	3962	4984	4925
		3403	4009	3458	3942	3611	3660	3971	4995	4937
		3438	4021	3476	3928	3574	3680	3935	4978	4914
		3407	4043	3470	3897	3585	3639	3943	4998	4937
		3419	4026	3468	3941	3615	3634	3948	5025	4929
		3440	4060	3456	3899	3605	3629	3972	5028	4966
		3422	4017	3480	3919	3603	3664	3934	5035	4926
		3403	4034	3454	3913	3626	3679	3960	5034	4976
		3438	4071	3463	3990	3620	3667	3946	5001	4950
		3442	4057	3473	3953	3610	3653	3967	5016	4999
		3411	4053	3498	3933	3650	3679	3973	5038	4936
		3422	4036	3496	3925	3628	3675	3992	5050	4974
		3429	4045	3451	3951	3596	3681	3939	4993	4989
		3455	4059	3473	3921	3628	3662	3927	5033	4941
		3420	4088	3496	3939	3644	3672	3970	5019	4968

## Sheet: Fig 1g
PSMβ2 kinetics
PSMβ2 monomeric concentration in mg/ml
	Time (h)	0.05 mg/ml	0.05 mg/ml	0.05 mg/ml	0.075 mg/ml	0.075 mg/ml	0.075 mg/ml	0.1 mg/ml	0.1 mg/ml	0.1 mg/ml	0.25 mg/ml	0.25 mg/ml	0.25 mg/ml	0.5 mg/ml	0.5 mg/ml	0.5 mg/ml	0.75 mg/ml	0.75 mg/ml	0.75 mg/ml	1 mg/ml	1 mg/ml	1 mg/ml
	0	198	196	200	232	234	243	272	270	245	581	606	587	402	438	438	683	579	706	793	793	722
	0.166667	199	205	203	243	244	259	285	276	249	617	712	634	425	456	470	788	715	720	906	924	790
	0.333333	199	204	200	241	242	256	296	302	270	691	769	761	463	480	501	838	792	785	972	998	904
	0.5	201	200	202	249	245	271	320	329	297	765	814	825	516	520	532	889	861	862	1041	1063	1038
	0.666667	205	210	211	251	262	285	339	365	326	821	847	881	559	547	557	937	913	925	1085	1126	1141
	0.833333	211	217	220	269	268	292	362	386	351	866	879	925	597	590	581	979	970	973	1144	1193	1208
	1	220	218	221	277	280	302	381	415	377	900	915	952	632	640	607	1031	1018	1016	1195	1254	1278
	1.16667	224	219	231	293	289	318	398	436	399	916	939	981	669	661	630	1063	1063	1056	1250	1316	1326
	1.33333	225	227	236	303	305	328	412	455	413	939	972	1008	700	705	651	1100	1109	1079	1308	1367	1374
	1.5	233	233	246	311	315	340	425	476	430	966	998	1023	734	743	683	1147	1151	1118	1358	1437	1434
	1.66667	240	242	254	328	326	358	440	492	447	989	1037	1060	756	765	711	1196	1195	1174	1438	1504	1484
	1.83333	246	249	259	343	342	371	452	513	464	1010	1073	1078	790	794	735	1246	1238	1221	1501	1561	1533
	2	249	254	267	356	356	381	460	528	483	1029	1103	1093	813	803	769	1301	1278	1294	1555	1612	1587
	2.16667	259	257	275	368	369	400	483	545	501	1046	1130	1108	850	823	797	1340	1311	1370	1587	1641	1623
	2.33333	261	267	283	382	387	414	491	558	518	1069	1164	1125	867	839	824	1387	1345	1414	1632	1685	1664
	2.5	269	276	288	395	402	428	503	577	534	1084	1206	1136	891	855	844	1428	1388	1455	1656	1715	1687
	2.66667	273	280	297	411	416	444	517	592	548	1104	1232	1145	912	867	864	1474	1418	1475	1695	1734	1702
	2.83333	284	285	305	419	425	453	527	607	561	1114	1258	1142	938	879	884	1499	1444	1501	1702	1766	1733
	3	284	292	311	431	440	467	535	618	570	1128	1273	1160	953	890	899	1524	1480	1514	1730	1780	1745
	3.16667	288	299	316	442	449	478	545	629	587	1155	1294	1164	970	900	921	1556	1498	1533	1740	1797	1776
	3.33333	296	303	322	456	450	485	554	643	599	1174	1304	1171	983	915	942	1570	1518	1543	1754	1810	1787
	3.5	300	306	331	463	460	495	570	653	609	1185	1325	1186	994	924	952	1582	1543	1566	1762	1815	1802
	3.66667	308	316	333	473	475	503	572	660	620	1189	1334	1187	1004	936	966	1608	1563	1573	1785	1835	1810
	3.83333	313	319	340	478	480	511	583	670	629	1205	1353	1195	1022	942	979	1619	1577	1589	1801	1849	1825
	4	317	323	342	486	486	515	589	683	637	1214	1364	1198	1038	952	986	1632	1594	1596	1811	1864	1847
	4.16667	322	328	350	489	495	525	601	692	643	1223	1373	1204	1045	963	995	1649	1604	1601	1821	1864	1843
	4.33333	330	335	350	494	500	529	607	699	650	1236	1385	1215	1052	969	1013	1662	1624	1611	1826	1888	1856
	4.5	333	337	359	507	504	534	611	703	662	1244	1386	1215	1059	977	1022	1663	1630	1619	1833	1891	1866
	4.66667	334	341	361	504	507	541	625	709	670	1249	1404	1222	1073	989	1031	1680	1636	1631	1843	1896	1883
	4.83333	344	347	365	514	512	546	634	716	677	1269	1404	1237	1085	1000	1040	1688	1643	1650	1853	1910	1891
	5	348	353	371	518	515	548	637	721	682	1274	1414	1228	1085	1005	1044	1706	1657	1649	1867	1923	1886
	5.16667	353	358	375	515	521	552	642	726	690	1283	1427	1234	1089	1017	1050	1710	1674	1662	1868	1924	1900
	5.33333	357	356	377	521	523	553	647	735	695	1286	1433	1242	1096	1018	1057	1717	1670	1661	1874	1946	1911
	5.5	360	359	379	530	529	553	649	728	698	1292	1426	1254	1105	1024	1066	1720	1688	1674	1886	1939	1918
	5.66667	369	366	380	529	533	563	656	741	707	1297	1439	1253	1112	1041	1071	1728	1692	1682	1896	1952	1919
	5.83333	369	366	388	532	538	568	663	749	705	1304	1451	1256	1121	1042	1079	1738	1705	1695	1912	1954	1922
	6	372	369	387	535	541	564	667	745	708	1304	1454	1257	1122	1047	1083	1758	1710	1696	1906	1959	1934
	6.16667	376	369	390	538	544	568	668	754	717	1312	1456	1267	1124	1056	1090	1778	1723	1699	1918	1967	1947
	6.33333	380	371	392	544	548	575	668	754	721	1314	1464	1262	1126	1065	1095	1791	1729	1701	1915	1980	1941
	6.5	386	378	392	545	546	574	675	750	725	1316	1464	1273	1127	1063	1094	1794	1735	1706	1927	1979	1962
	6.66667	389	379	399	547	548	583	686	759	723	1326	1471	1272	1134	1077	1102	1797	1752	1717	1929	1989	1962
	6.83333	394	382	398	544	546	581	685	758	727	1328	1492	1281	1142	1083	1113	1796	1803	1718	1956	1990	1965
	7	389	387	401	545	550	579	684	760	731	1325	1487	1280	1144	1083	1119	1798	1803	1732	1946	1998	1970
	7.16667	395	387	403	552	555	581	695	765	733	1338	1486	1278	1148	1101	1124	1807	1801	1733	1954	2001	1971
	7.33333	396	387	404	547	556	582	697	759	737	1331	1496	1290	1153	1095	1127	1815	1806	1731	1947	2007	1977
	7.5	402	387	405	551	556	583	695	768	737	1336	1502	1296	1154	1100	1139	1823	1822	1754	1948	2013	1977
	7.66667	402	386	407	551	554	592	698	768	734	1346	1510	1301	1150	1106	1145	1816	1819	1750	1961	2026	1991
	7.83333	403	392	410	555	556	587	704	767	739	1350	1512	1300	1157	1111	1154	1820	1820	1752	1961	2032	1990
	8	405	391	405	556	559	591	702	770	744	1348	1517	1304	1175	1125	1159	1821	1818	1764	1962	2026	1999
	8.16667	405	395	409	553	560	589	710	775	751	1348	1521	1303	1178	1138	1158	1828	1830	1769	1988	2031	1998
	8.33333	415	390	411	557	559	593	708	772	750	1366	1532	1315	1182	1130	1162	1836	1828	1758	1976	2031	2018
	8.5	412	391	410	558	558	593	711	775	758	1360	1533	1310	1185	1133	1169	1838	1845	1770	1993	2029	2009
	8.66667	412	396	415	557	560	594	714	783	751	1374	1538	1313	1191	1149	1184	1851	1834	1784	1982	2042	2016
	8.83333	416	398	412	558	558	594	713	779	751	1374	1544	1316	1189	1149	1190	1855	1840	1777	2001	2041	2021
	9	416	397	412	564	561	594	720	775	755	1376	1551	1317	1189	1163	1195	1855	1849	1773	1996	2033	2032
	9.16667	412	402	415	560	564	594	721	781	758	1377	1557	1321	1196	1164	1201	1857	1855	1790	2002	2038	2026
	9.33333	418	399	415	559	566	597	719	785	751	1378	1561	1327	1202	1170	1209	1864	1858	1789	2012	2034	2042
	9.5	417	400	414	566	569	592	723	785	763	1378	1568	1335	1213	1174	1219	1857	1858	1801	2017	2045	2050
	9.66667	420	402	421	563	563	600	724	781	761	1380	1567	1339	1212	1179	1220	1867	1872	1800	2026	2053	2041
	9.83333	420	404	417	560	567	601	722	792	762	1380	1578	1347	1221	1187	1225	1878	1876	1804	2026	2060	2055
	10	423	404	417	564	570	599	724	784	763	1387	1582	1352	1226	1197	1243	1876	1875	1812	2032	2059	2057
	10.1667	422	403	415	563	564	597	727	790	764	1392	1588	1360	1228	1198	1235	1882	1871	1808	2032	2056	2061
	10.3333	422	406	417	564	567	599	731	786	769	1405	1588	1369	1237	1204	1241	1895	1882	1810	2033	2069	2077
	10.5	420	406	424	565	570	600	727	788	770	1404	1603	1374	1231	1215	1250	1893	1889	1823	2032	2074	2078
	10.6667	425	405	422	564	566	596	730	788	763	1407	1609	1380	1246	1210	1250	1894	1888	1826	2047	2077	2067
	10.8333	429	408	418	567	568	606	735	784	773	1410	1608	1385	1251	1217	1264	1896	1899	1839	2045	2089	2078
	11	424	407	418	569	569	598	732	792	767	1410	1625	1389	1253	1230	1270	1901	1908	1839	2040	2080	2083
	11.1667	421	406	427	567	564	598	741	790	777	1424	1618	1394	1261	1222	1281	1908	1898	1841	2051	2091	2083
	11.3333	421	399	416	564	566	600	739	796	778	1421	1625	1395	1260	1224	1276	1906	1908	1848	2046	2090	2084
	11.5	426	408	417	567	565	599	744	798	776	1422	1623	1395	1271	1229	1287	1918	1914	1846	2052	2088	2089
	11.6667	424	407	418	569	567	604	733	801	783	1430	1638	1410	1268	1232	1285	1914	1927	1848	2068	2103	2106
	11.8333	421	405	419	571	576	594	742	795	779	1433	1640	1406	1279	1238	1299	1919	1912	1855	2056	2095	2099
	12	425	409	419	567	565	599	738	796	783	1436	1653	1406	1274	1245	1298	1924	1925	1858	2074	2108	2099
	12.1667	427	408	423	572	570	601	739	796	780	1447	1660	1403	1290	1253	1303	1937	1928	1859	2064	2118	2107
	12.3333	428	408	418	569	564	600	743	804	782	1446	1665	1404	1296	1258	1312	1932	1931	1866	2072	2116	2102
	12.5	427	403	422	565	566	602	744	798	789	1440	1667	1409	1288	1258	1323	1933	1940	1866	2076	2120	2108
	12.6667	429	409	425	563	566	601	748	797	786	1461	1666	1407	1306	1261	1325	1932	1934	1869	2082	2129	2109
	12.8333	429	410	421	572	568	598	751	797	792	1463	1676	1410	1304	1270	1324	1938	1948	1880	2084	2137	2115
	13	427	409	418	565	561	601	747	800	788	1459	1681	1420	1311	1271	1335	1940	1948	1892	2084	2138	2117
	13.1667	429	406	418	570	571	596	747	801	790	1462	1684	1416	1313	1281	1342	1947	1950	1874	2088	2135	2114
	13.3333	422	407	420	571	566	599	756	805	789	1467	1686	1424	1318	1290	1337	1955	1953	1886	2087	2136	2129
	13.5	430	408	424	568	566	601	752	804	799	1480	1698	1420	1329	1286	1343	1960	1949	1901	2095	2153	2131
	13.6667	428	405	418	567	571	598	746	803	791	1484	1712	1430	1322	1292	1350	1963	1963	1897	2099	2135	2127
	13.8333	427	407	423	569	571	602	754	807	792	1474	1705	1441	1331	1292	1354	1971	1962	1898	2098	2141	2141
	14	432	411	420	572	569	603	751	804	798	1483	1707	1454	1336	1301	1351	1960	1969	1898	2094	2145	2133
	14.1667	429	410	426	570	571	602	755	808	793	1486	1721	1466	1346	1299	1367	1960	1976	1905	2106	2152	2142
	14.3333	433	409	426	572	571	605	758	805	804	1488	1721	1464	1341	1312	1359	1974	1979	1906	2108	2155	2151
	14.5	427	413	426	573	568	601	755	805	803	1504	1725	1475	1348	1305	1383	1979	1977	1910	2109	2164	2145
	14.6667	433	407	423	571	574	607	758	811	807	1495	1736	1472	1355	1313	1386	1980	1991	1919	2119	2168	2153
	14.8333	430	410	422	570	570	600	756	814	804	1514	1729	1475	1357	1312	1387	1973	1988	1921	2131	2164	2156
	15	433	411	430	568	573	610	762	817	810	1510	1727	1476	1362	1322	1392	1983	1993	1920	2118	2166	2151
	15.1667	433	407	425	574	572	603	762	811	804	1516	1739	1482	1372	1323	1396	1987	2000	1926	2127	2177	2157
	15.3333	433	407	423	571	571	605	757	822	807	1518	1736	1479	1370	1319	1402	1985	1995	1928	2137	2170	2163
	15.5	428	411	423	569	573	602	757	814	803	1517	1749	1482	1375	1323	1404	1994	1993	1928	2131	2180	2167
	15.6667	430	410	423	568	571	602	765	815	811	1527	1749	1484	1385	1329	1414	1993	2006	1933	2137	2186	2179
	15.8333	432	409	423	573	573	607	769	817	817	1527	1763	1493	1382	1332	1415	2007	2011	1935	2142	2180	2163
	16	431	413	423	569	573	603	768	818	818	1538	1764	1480	1388	1338	1414	2001	2009	1948	2131	2187	2185
	16.1667	430	413	424	568	570	605	765	818	818	1542	1767	1491	1395	1342	1427	2005	2012	1938	2150	2184	2184
	16.3333	429	409	422	570	571	603	764	820	815	1541	1774	1496	1389	1341	1424	2011	2016	1936	2142	2193	2175
	16.5	428	412	424	570	566	601	774	824	822	1545	1779	1492	1397	1349	1431	2017	2025	1956	2142	2199	2188
	16.6667	435	406	427	569	571	604	766	815	815	1550	1783	1494	1407	1353	1438	2012	2015	1957	2153	2199	2183
	16.8333	432	408	426	571	578	602	771	819	819	1560	1795	1501	1406	1353	1437	2024	2032	1954	2154	2208	2193
	17	431	406	422	577	568	600	773	820	822	1553	1795	1509	1414	1362	1439	2015	2038	1955	2155	2196	2200
	17.1667	432	406	424	572	567	602	769	825	818	1568	1797	1500	1414	1363	1448	2017	2028	1956	2153	2213	2201
	17.3333	430	414	420	571	570	597	770	823	818	1573	1794	1507	1414	1365	1453	2025	2040	1957	2161	2204	2204
	17.5	431	410	424	574	569	603	782	821	824	1574	1792	1512	1416	1367	1466	2031	2032	1974	2152	2204	2206
	17.6667	432	412	422	567	571	601	776	820	828	1580	1801	1511	1428	1378	1461	2018	2037	1970	2168	2216	2205
	17.8333	426	405	423	570	571	599	773	826	831	1583	1810	1507	1434	1376	1464	2028	2043	1976	2178	2225	2198
	18	430	411	419	570	571	607	777	826	832	1586	1813	1516	1426	1373	1467	2038	2049	1976	2165	2229	2206
	18.1667	430	408	422	566	572	600	777	827	829	1589	1815	1513	1445	1386	1476	2039	2054	1979	2169	2229	2208
	18.3333	427	413	420	570	574	601	782	828	835	1599	1819	1507	1440	1380	1481	2045	2057	1965	2171	2234	2212
	18.5	427	411	425	568	566	601	786	831	832	1596	1827	1504	1453	1385	1478	2037	2057	1984	2178	2235	2221
	18.6667	427	411	423	567	571	605	785	834	835	1605	1825	1500	1453	1387	1490	2049	2053	1982	2178	2232	2224
	18.8333	432	411	426	575	567	606	791	833	838	1609	1832	1509	1453	1388	1499	2050	2072	1982	2188	2235	2219
	19	431	408	427	574	573	601	789	838	835	1604	1834	1512	1466	1387	1497	2050	2065	1987	2192	2232	2223
	19.1667	430	407	423	573	572	601	789	839	836	1616	1826	1518	1456	1394	1492	2054	2063	1994	2170	2247	2218
	19.3333	428	407	421	566	570	595	787	833	842	1623	1834	1509	1473	1396	1506	2055	2083	1995	2187	2243	2232
	19.5	431	409	424	572	573	609	786	828	843	1626	1837	1522	1473	1400	1509	2063	2075	1998	2188	2250	2245
	19.6667	429	409	419	575	568	602	792	835	842	1630	1853	1527	1478	1407	1504	2060	2075	1996	2201	2240	2231
	19.8333	428	410	425	571	571	602	790	834	849	1635	1846	1513	1477	1404	1513	2064	2066	2005	2191	2252	2229
	20	428	416	421	569	567	598	791	840	849	1635	1853	1521	1479	1415	1507	2075	2078	2004	2196	2256	2240
	20.1667	429	405	421	566	568	602	794	839	852	1648	1857	1530	1478	1411	1523	2062	2085	2008	2204	2262	2244
	20.3333	424	408	426	570	567	599	790	840	849	1647	1872	1527	1481	1409	1526	2068	2085	2004	2205	2269	2240
	20.5	425	406	424	566	575	604	794	834	862	1646	1870	1535	1493	1424	1541	2088	2092	2008	2201	2258	2258
	20.6667	427	407	424	569	570	602	796	847	857	1660	1866	1530	1499	1422	1534	2063	2080	2017	2203	2276	2234
	20.8333	427	409	420	574	574	604	796	843	857	1658	1872	1534	1495	1428	1543	2071	2092	2022	2207	2273	2260
	21	431	410	425	571	571	601	797	845	859	1671	1874	1541	1508	1423	1528	2085	2092	2025	2210	2262	2249
	21.1667	426	408	424	569	570	601	802	849	858	1671	1881	1539	1503	1430	1553	2074	2092	2024	2203	2283	2243
	21.3333	425	408	423	570	570	597	793	847	861	1674	1896	1539	1514	1436	1551	2086	2097	2031	2211	2269	2254
	21.5	430	409	426	569	573	599	800	840	864	1679	1881	1542	1517	1435	1548	2084	2101	2035	2215	2278	2254
	21.6667	429	404	421	567	571	595	800	848	865	1684	1891	1538	1512	1437	1558	2079	2101	2023	2211	2280	2259
	21.8333	427	406	419	568	570	596	802	847	863	1686	1896	1542	1517	1448	1562	2097	2099	2029	2213	2290	2273
	22	428	405	423	569	570	603	804	855	869	1689	1888	1549	1523	1444	1567	2088	2110	2032	2229	2276	2255
	22.1667	425	408	422	567	573	597	806	847	871	1688	1907	1551	1518	1456	1569	2104	2114	2032	2224	2295	2260
	22.3333	426	410	424	571	578	602	807	851	866	1693	1913	1550	1531	1456	1581	2093	2113	2043	2228	2287	2264
	22.5	433	407	423	564	569	600	805	846	874	1701	1911	1555	1527	1447	1572	2104	2124	2041	2231	2285	2269
	22.6667	428	405	424	562	569	603	809	855	870	1704	1909	1553	1541	1454	1585	2101	2124	2042	2228	2291	2275
	22.8333	426	405	425	571	571	602	807	851	877	1712	1909	1558	1531	1457	1576	2108	2123	2043	2223	2293	2270
	23	421	405	423	566	570	594	804	855	877	1718	1926	1563	1542	1462	1584	2106	2118	2040	2235	2301	2269
	23.1667	424	407	420	567	566	600	815	858	876	1716	1916	1552	1540	1460	1593	2106	2122	2042	2230	2302	2281
	23.3333	428	407	424	570	568	603	812	853	876	1715	1915	1563	1547	1463	1588	2112	2126	2043	2228	2300	2281
	23.5	428	405	419	569	566	598	817	852	876	1725	1931	1565	1549	1465	1588	2100	2129	2048	2251	2293	2275
	23.6667	426	406	422	564	569	602	813	856	888	1739	1923	1557	1554	1468	1598	2103	2136	2060	2237	2303	2272
	23.8333	426	403	424	566	577	601	822	859	886	1736	1930	1565	1557	1471	1599	2106	2131	2056	2232	2305	2281
	24	424	405	423	570	568	598	818	857	885	1736	1940	1570	1561	1466	1607	2111	2137	2062	2227	2312	2288
	24.1667	418	407	422	567	572	600	818	858	888	1749	1935	1569	1556	1482	1611	2112	2145	2057	2246	2317	2294
	24.3333	424	402	424	571	569	599	820	862	885	1748	1947	1580	1565	1474	1617	2121	2146	2064	2241	2313	2291
	24.5	421	410	419	569	567	593	826	858	894	1752	1937	1574	1568	1484	1616	2121	2142	2059	2256	2319	2291
	24.6667	428	402	425	570	568	598	823	863	898	1757	1951	1572	1576	1487	1625	2125	2143	2056	2248	2316	2290
	24.8333	424	407	422	566	569	598	822	860	893	1754	1953	1581	1570	1481	1617	2131	2140	2070	2257	2323	2291
	25	423	405	425	568	568	599	825	861	899	1766	1958	1577	1578	1489	1625	2134	2160	2075	2255	2319	2305
	25.1667	420	406	427	564	567	596	829	862	903	1772	1953	1572	1580	1481	1636	2129	2146	2082	2255	2327	2299
	25.3333	425	404	423	567	574	600	823	866	902	1772	1957	1579	1579	1488	1640	2131	2151	2074	2248	2331	2304
	25.5	426	405	426	564	568	599	826	869	899	1779	1957	1582	1593	1492	1649	2131	2153	2087	2264	2331	2304
	25.6667	427	408	423	569	568	600	831	865	905	1788	1967	1580	1589	1491	1643	2141	2159	2083	2251	2322	2306

## Sheet: Fig 1h
PSMβ2 kinetics in presence of low regime of seeds
		Seed concentration
	Time (h)	0 nM	0 nM	0 nM	10 nM	10 nM	10 nM	50 nM	50 nM	50 nM	100 nM	100 nM	100 nM
	0	116	120	122	118	118	122	118	119	115	114	116	121
	0.0333333	103	106	111	104	108	106	105	107	106	107	107	107
	0.0666667	101	104	105	102	104	106	100	101	101	101	99	102
	0.1	101	104	104	102	101	106	100	101	102	98	99	100
	0.133333	99	100	101	99	99	105	98	101	100	96	103	99
	0.166667	95	102	102	100	101	104	102	98	98	100	98	96
	0.2	98	101	102	102	98	104	98	96	100	98	99	100
	0.233333	100	100	100	101	102	105	99	100	99	99	98	99
	0.266667	99	104	104	100	102	104	97	98	101	92	97	98
	0.3	99	98	102	100	100	104	102	101	101	97	100	102
	0.333333	97	105	100	101	98	103	101	102	99	101	102	103
	0.366667	100	103	105	101	101	104	97	100	101	100	100	100
	0.4	100	102	104	102	102	102	103	101	102	104	101	100
	0.433333	101	105	101	99	101	102	96	103	105	100	100	103
	0.466667	104	100	103	102	104	103	104	104	101	98	101	103
	0.5	98	97	106	106	103	106	100	101	103	99	101	102
	0.533333	100	102	101	104	100	103	100	100	103	102	100	100
	0.566667	100	106	102	102	101	106	101	101	100	102	103	103
	0.6	99	101	105	102	103	105	98	100	105	102	103	100
	0.633333	100	103	102	102	103	105	100	98	101	99	103	103
	0.666667	102	103	103	104	104	104	102	101	101	102	105	105
	0.7	99	105	106	105	102	109	102	102	101	103	104	102
	0.733333	103	103	104	106	102	108	99	104	103	103	103	103
	0.766667	101	104	104	105	105	107	102	102	105	103	105	103
	0.8	103	107	107	108	107	106	101	105	102	102	105	105
	0.833333	100	105	106	107	107	107	105	103	100	101	105	105
	0.866667	104	104	104	107	105	110	104	99	102	101	102	105
	0.9	103	105	106	106	106	109	106	103	105	104	105	103
	0.933333	102	107	108	109	103	106	103	103	103	104	102	105
	0.966667	104	103	105	108	109	106	106	105	104	103	105	104
	1	107	106	107	110	106	108	108	107	108	104	105	107
	1.03333	106	107	109	109	106	107	106	106	106	103	107	106
	1.06667	103	106	107	114	109	109	107	110	107	107	107	109
	1.1	107	107	111	110	112	110	106	108	106	105	108	107
	1.13333	106	107	112	110	109	108	109	107	105	107	108	110
	1.16667	108	109	109	113	111	109	107	105	106	109	107	110
	1.2	107	106	111	114	112	112	108	110	106	110	107	113
	1.23333	109	110	114	115	111	113	110	110	111	109	108	111
	1.26667	113	111	115	117	114	114	111	111	110	108	111	114
	1.3	112	110	115	114	116	115	110	112	111	110	113	112
	1.33333	114	115	121	120	117	115	111	115	113	112	114	115
	1.36667	113	113	117	120	118	110	113	111	110	112	114	115
	1.4	115	113	124	122	121	115	113	115	112	113	117	116
	1.43333	117	115	118	123	119	119	116	118	114	117	116	119
	1.46667	114	119	123	126	120	120	118	119	116	118	119	122
	1.5	120	122	125	124	123	119	115	119	118	119	122	123
	1.53333	123	123	123	125	126	118	120	122	119	117	124	126
	1.56667	122	123	126	128	126	120	119	121	122	119	129	128
	1.6	121	124	126	128	123	121	122	126	123	121	126	129
	1.63333	124	126	127	132	128	127	126	130	126	124	130	134
	1.66667	127	130	130	130	130	129	129	128	127	122	133	131
	1.7	129	131	127	132	130	130	131	132	130	127	133	135
	1.73333	130	128	132	135	135	129	129	132	129	127	135	135
	1.76667	134	135	130	135	135	131	131	134	133	131	137	137
	1.8	135	133	134	135	138	135	134	139	135	131	141	143
	1.83333	139	137	133	143	140	137	134	138	138	136	146	143
	1.86667	142	140	139	142	145	141	139	145	140	135	147	144
	1.9	147	145	139	144	146	141	140	147	142	138	151	144
	1.93333	150	143	142	144	148	140	140	146	143	140	149	147
	1.96667	154	146	146	146	153	145	142	146	145	141	154	146
	2	159	148	148	150	154	149	145	151	148	142	158	150
	2.03333	158	153	149	149	156	153	147	151	150	145	158	153
	2.06667	160	153	147	154	160	153	151	155	155	151	164	154
	2.1	165	153	151	154	160	161	151	155	154	154	168	157
	2.13333	170	158	156	156	163	163	151	159	158	154	168	162
	2.16667	172	162	154	160	168	165	154	158	160	156	172	162
	2.2	174	165	157	159	166	167	157	164	164	160	174	165
	2.23333	174	167	158	164	167	171	157	163	164	163	177	165
	2.26667	174	169	161	159	172	174	156	162	168	169	184	169
	2.3	181	173	162	168	174	178	163	170	171	172	184	173
	2.33333	184	176	165	170	175	183	166	168	174	179	191	181
	2.36667	184	176	170	175	175	184	167	172	175	182	195	182
	2.4	191	180	171	174	179	188	169	177	178	183	197	183
	2.43333	192	186	171	177	178	191	167	176	183	185	199	186
	2.46667	194	186	174	176	183	192	169	180	184	194	205	191
	2.5	195	193	172	182	184	195	171	188	186	192	208	196
	2.53333	200	194	177	181	188	200	172	190	185	197	213	198
	2.56667	207	199	179	184	190	202	176	190	189	197	212	198
	2.6	208	204	182	189	192	207	180	193	193	201	217	204
	2.63333	210	204	184	194	190	207	182	195	199	203	221	206
	2.66667	210	206	188	196	197	209	186	201	201	207	227	208
	2.7	214	211	189	202	194	214	186	203	204	214	230	215
	2.73333	218	210	196	204	198	217	188	201	204	214	229	216
	2.76667	222	214	200	207	204	217	189	208	207	221	234	219
	2.8	222	217	206	214	203	223	191	207	209	218	239	224
	2.83333	227	221	208	217	205	223	196	208	216	225	244	228
	2.86667	228	230	213	218	209	224	201	215	217	226	243	232
	2.9	234	230	213	222	212	228	205	212	220	228	246	233
	2.93333	234	235	217	229	212	230	206	221	225	235	249	240
	2.96667	241	239	223	231	216	235	210	218	227	233	254	241
	3	241	241	225	234	217	238	212	225	230	240	253	245
	3.03333	245	244	229	237	218	240	214	226	233	247	261	246
	3.06667	247	248	232	240	222	240	218	229	238	241	266	255
	3.1	248	250	238	245	224	247	222	231	240	252	266	254
	3.13333	250	250	238	244	227	248	218	235	241	256	272	262
	3.16667	257	257	248	245	225	253	225	238	246	254	278	258
	3.2	256	257	251	250	230	249	226	239	252	263	276	267
	3.23333	262	263	256	251	236	255	229	240	250	265	280	267
	3.26667	263	262	251	255	239	256	228	242	251	265	284	271
	3.3	265	268	259	264	239	260	235	244	255	264	286	271
	3.33333	268	269	263	262	239	260	241	250	262	271	289	275
	3.36667	272	272	266	263	244	266	242	253	265	277	290	278
	3.4	273	276	270	269	251	270	243	256	269	280	294	282
	3.43333	278	281	276	272	253	267	251	260	268	286	298	280
	3.46667	280	283	271	274	255	273	248	260	270	286	300	284
	3.5	278	282	279	274	256	275	253	261	275	288	301	284
	3.53333	281	288	279	273	260	278	255	265	278	286	302	291
	3.56667	283	290	279	281	258	278	258	263	280	296	304	293
	3.6	286	291	283	278	262	285	258	265	281	298	309	294
	3.63333	290	297	280	284	262	282	264	270	283	300	312	295
	3.66667	291	295	286	284	271	288	270	270	285	307	312	299
	3.7	295	297	287	289	268	289	268	276	288	306	320	299
	3.73333	291	299	289	286	272	290	273	278	289	308	320	306
	3.76667	296	301	294	289	276	295	275	280	293	311	327	307
	3.8	297	300	298	290	279	295	283	279	297	320	326	308
	3.83333	296	305	302	292	280	299	280	284	299	325	330	310
	3.86667	303	311	301	293	277	300	285	284	301	325	334	319
	3.9	300	311	303	292	283	305	287	288	297	330	330	319
	3.93333	299	312	305	293	286	308	288	289	305	332	334	322
	3.96667	305	312	305	297	290	311	291	288	307	329	343	321
	4	310	313	308	295	291	311	296	296	308	335	341	324
	4.03333	307	318	305	301	291	311	297	294	306	337	342	323
	4.06667	312	319	308	298	298	314	303	297	308	344	345	326
	4.1	311	320	310	302	298	319	303	300	317	350	343	330
	4.13333	317	323	313	303	299	317	306	300	317	349	344	328
	4.16667	313	326	311	302	298	321	307	302	320	355	352	339
	4.2	318	328	315	302	303	321	307	309	322	359	352	334
	4.23333	314	333	316	307	304	325	309	313	326	358	354	339
	4.26667	320	330	317	307	309	329	315	307	325	368	356	341
	4.3	323	330	318	311	313	324	318	309	330	365	356	346
	4.33333	321	329	320	305	314	328	319	314	331	365	359	335
	4.36667	321	334	324	310	314	333	321	315	330	371	357	344
	4.4	323	337	325	311	317	333	323	316	333	373	366	346
	4.43333	326	334	326	313	327	336	324	322	338	370	369	344
	4.46667	323	335	331	310	323	339	330	325	334	376	370	345
	4.5	330	339	327	312	328	339	332	323	340	378	371	346
	4.53333	329	343	332	311	329	341	332	323	342	383	369	354
	4.56667	324	343	329	312	332	342	336	330	347	383	376	355
	4.6	329	340	329	316	333	346	335	329	353	385	377	362
	4.63333	334	346	338	316	334	351	336	331	345	387	376	359
	4.66667	333	344	335	317	341	354	338	334	349	394	376	362
	4.7	331	342	334	318	345	356	344	338	353	392	378	363
	4.73333	337	342	336	318	344	356	342	338	349	394	385	365
	4.76667	343	343	337	322	345	352	349	341	354	393	386	368
	4.8	337	351	340	315	345	356	348	341	355	399	383	364
	4.83333	337	348	340	322	349	362	350	334	357	398	385	372
	4.86667	339	346	340	322	354	366	353	346	355	404	382	373
	4.9	344	352	342	323	351	362	355	343	358	403	389	372
	4.93333	338	351	345	322	351	367	350	349	365	406	384	376
	4.96667	342	353	347	326	355	371	360	351	366	405	393	376
	5	341	354	341	323	359	370	360	352	367	409	391	376
	5.03333	341	354	348	327	360	369	362	349	362	405	397	384
	5.06667	346	359	343	328	360	371	361	354	367	414	393	377
	5.1	348	358	347	328	364	373	365	357	373	408	397	376
	5.13333	346	359	349	333	366	372	370	358	368	409	393	384
	5.16667	349	357	352	331	371	377	372	354	372	414	397	386
	5.2	351	358	352	332	370	373	369	356	374	417	399	389
	5.23333	353	364	351	336	372	380	367	361	369	421	402	387
	5.26667	352	361	350	339	371	378	373	366	373	418	404	389
	5.3	350	361	350	337	378	380	370	368	374	417	398	388
	5.33333	354	363	349	337	374	376	372	363	380	422	404	389
	5.36667	349	363	350	341	378	386	377	368	375	420	405	393
	5.4	353	361	352	343	378	387	379	371	374	424	406	395
	5.43333	350	362	353	342	380	389	382	366	379	426	403	398
	5.46667	352	368	354	342	386	383	378	371	382	430	408	392
	5.5	355	364	354	346	381	388	380	374	380	426	412	397
	5.53333	361	365	357	344	387	390	383	375	382	428	409	396
	5.56667	362	367	354	349	385	385	382	372	382	426	409	397
	5.6	358	363	356	351	388	388	385	378	380	428	408	402
	5.63333	356	367	358	354	388	392	381	376	389	434	413	397
	5.66667	360	369	356	353	388	387	393	376	388	433	414	400
	5.7	361	368	360	358	392	395	388	379	381	436	411	402
	5.73333	362	372	358	354	393	399	387	379	389	435	415	405
	5.76667	365	368	361	359	391	395	388	381	388	438	411	406
	5.8	364	370	363	361	396	399	391	385	388	438	421	404
	5.83333	363	367	361	356	398	401	392	382	388	435	419	411
	5.86667	365	374	363	359	396	399	390	387	388	441	418	404
	5.9	365	371	360	360	397	395	394	385	389	443	421	411
	5.93333	364	374	366	362	403	397	397	385	398	445	416	411
	5.96667	366	371	364	368	401	404	398	390	394	441	423	407
	6	368	376	367	369	404	406	394	387	394	442	413	409
	6.03333	367	373	367	368	405	404	398	388	393	445	420	408
	6.06667	364	375	370	371	406	404	396	388	393	446	426	414
	6.1	364	370	365	375	409	404	397	390	394	445	423	411
	6.13333	368	378	368	375	407	407	402	393	403	446	427	414
	6.16667	372	373	363	377	408	410	400	395	399	447	426	420
	6.2	368	373	369	371	410	410	401	395	398	444	424	417
	6.23333	368	375	365	375	415	412	404	398	403	450	427	418
	6.26667	367	375	370	379	412	408	404	396	400	443	424	418
	6.3	367	376	368	380	412	411	402	402	405	448	425	418
	6.33333	370	374	372	378	411	412	409	397	406	447	425	415
	6.36667	369	379	368	384	414	409	403	398	400	452	421	419
	6.4	372	379	370	382	413	416	405	401	403	451	431	419
	6.43333	370	379	371	384	416	415	406	404	407	456	429	417
	6.46667	371	380	372	387	416	417	409	402	403	454	431	421
	6.5	370	379	372	388	419	415	409	402	399	453	430	422
	6.53333	375	380	371	387	419	414	411	407	405	450	427	421
	6.56667	374	379	373	384	421	421	410	406	402	455	433	424
	6.6	375	380	376	392	421	421	409	406	409	453	430	422
	6.63333	372	378	372	391	421	421	411	410	409	451	431	425
	6.66667	372	379	371	391	424	418	412	405	408	452	430	424
	6.7	376	378	373	393	425	417	408	409	406	452	433	423
	6.73333	370	381	374	393	425	418	414	409	408	454	436	422
	6.76667	377	379	374	393	425	419	415	404	412	455	432	425
	6.8	380	380	376	393	424	421	415	407	411	456	433	425
	6.83333	376	382	375	395	425	422	417	409	412	457	437	424
	6.86667	374	382	377	392	427	421	418	409	409	461	437	426
	6.9	376	384	375	395	430	423	416	412	409	457	431	426
	6.93333	378	380	375	402	431	423	418	415	412	454	436	427
	6.96667	378	384	378	400	429	424	416	415	411	457	436	428
	7	374	380	377	406	425	423	417	411	411	458	435	429
	7.03333	379	381	376	406	430	427	422	415	417	456	439	427
	7.06667	381	384	377	406	430	426	418	414	413	456	436	426
	7.1	376	385	379	405	433	426	420	413	413	459	437	429
	7.13333	380	382	378	406	433	427	422	415	418	459	440	434
	7.16667	380	386	381	404	437	421	421	417	415	458	440	429
	7.2	379	385	377	405	437	426	417	417	419	461	443	432
	7.23333	381	387	377	407	436	431	426	420	418	461	442	428
	7.26667	380	388	381	411	435	429	423	413	419	462	447	433
	7.3	380	387	381	410	436	424	421	419	417	458	440	435
	7.33333	382	385	380	410	432	429	429	416	422	465	443	432
	7.36667	381	388	377	411	441	429	419	421	419	467	442	431
	7.4	381	384	379	411	435	431	423	419	420	458	441	431
	7.43333	381	384	380	412	440	429	424	424	419	465	442	435
	7.46667	381	389	383	411	440	426	423	423	423	461	446	433
	7.5	385	389	381	414	440	428	423	418	421	463	443	438
	7.53333	379	388	381	413	445	434	423	419	421	463	444	431
	7.56667	386	392	382	416	436	428	425	424	424	468	444	433
	7.6	382	386	385	409	439	431	431	423	426	465	446	434
	7.63333	386	390	378	414	439	436	431	422	425	467	445	436
	7.66667	385	387	386	408	442	436	433	428	424	461	444	432
	7.7	383	391	382	414	439	432	428	421	425	460	444	435
	7.73333	381	388	382	412	437	432	431	420	420	459	441	438
	7.76667	380	385	376	408	441	435	429	424	419	459	441	437
	7.8	383	384	381	413	438	429	428	422	423	464	446	433
	7.83333	377	385	380	411	442	424	429	424	422	456	438	434
	7.86667	382	381	382	410	443	432	428	418	421	464	440	433
	7.9	380	383	382	412	443	427	431	420	421	460	442	438
	7.93333	382	385	380	411	443	426	428	423	421	463	442	432
	7.96667	384	385	382	417	440	427	428	425	420	457	437	436
	8	382	383	379	412	439	429	431	420	421	461	442	436
	8.03333	384	385	384	413	440	428	430	425	420	463	439	435
	8.06667	383	385	384	412	446	428	436	424	425	461	445	436
	8.1	383	388	381	415	444	431	432	423	423	462	438	442
	8.13333	386	386	384	414	443	428	436	424	424	467	444	441
	8.16667	382	386	381	417	446	431	434	421	424	459	446	435
	8.2	388	386	384	413	442	429	433	424	420	465	441	437
	8.23333	383	389	386	412	442	434	434	423	427	459	445	437
	8.26667	388	382	380	416	451	437	437	428	426	456	446	442
	8.3	385	385	383	414	444	436	438	426	426	467	446	436
	8.33333	389	382	383	414	444	431	432	421	426	463	445	440
	8.36667	387	387	380	424	446	436	435	421	422	466	454	435
	8.4	390	382	382	415	444	438	431	428	429	466	452	442
	8.43333	389	387	378	416	447	439	436	429	425	462	452	444
	8.46667	394	389	384	420	454	438	439	429	423	466	449	441
	8.5	385	385	385	420	445	436	432	428	427	467	451	436
	8.53333	389	388	390	423	451	435	437	429	429	472	449	441
	8.56667	392	391	386	412	449	434	437	428	427	471	455	441
	8.6	391	387	384	419	447	436	440	432	427	467	453	438
	8.63333	387	395	383	420	446	435	440	428	429	467	450	443
	8.66667	392	387	379	423	451	438	431	429	425	464	449	439
	8.7	390	393	386	422	451	440	434	427	425	465	453	439
	8.73333	392	389	391	421	452	438	438	431	427	467	452	438
	8.76667	393	387	386	423	453	439	440	425	428	466	451	444
	8.8	393	389	385	417	450	435	434	433	430	466	457	442
	8.83333	391	396	391	421	452	440	441	425	432	470	454	444
	8.86667	396	394	394	426	452	444	437	433	430	466	459	439
	8.9	394	392	389	422	450	441	439	439	432	468	457	441
	8.93333	397	387	389	422	450	437	445	430	431	466	457	441
	8.96667	398	392	389	421	454	441	440	433	428	470	457	447
	9	396	390	387	425	461	440	442	429	433	467	456	444
	9.03333	394	387	389	422	455	445	447	436	431	460	458	446
	9.06667	398	392	394	424	454	439	434	435	429	473	452	442
	9.1	394	391	388	424	455	442	438	438	432	462	458	448
	9.13333	400	388	386	421	455	438	441	437	434	469	464	444
	9.16667	395	392	390	420	454	441	438	436	437	469	454	448
	9.2	398	391	392	429	455	446	444	435	437	470	456	446
	9.23333	393	391	390	422	452	443	439	437	435	469	454	443
	9.26667	402	387	394	422	456	445	443	438	434	466	461	446
	9.3	399	395	391	426	458	446	443	434	437	467	462	446
	9.33333	396	390	391	426	456	443	444	438	431	468	465	449
	9.36667	404	394	387	422	454	443	447	436	441	471	464	446
	9.4	406	398	392	424	456	442	443	437	438	473	454	451
	9.43333	403	395	389	425	462	442	446	440	437	471	463	447
	9.46667	404	395	391	419	453	446	443	440	434	469	464	446
	9.5	401	392	393	428	463	440	445	440	437	470	457	448
	9.53333	402	396	395	425	459	451	448	437	435	473	459	449
	9.56667	404	392	391	426	455	440	446	438	440	464	460	449
	9.6	406	392	399	431	464	446	446	440	441	467	459	440
	9.63333	406	391	394	423	455	447	449	437	438	471	464	449
	9.66667	401	399	395	425	462	446	446	444	436	473	459	447
	9.7	402	395	394	424	464	445	444	441	440	471	461	452
	9.73333	397	400	391	425	465	447	448	439	440	471	464	449
	9.76667	411	397	395	432	461	449	448	442	439	468	457	452
	9.8	404	391	395	424	463	449	446	440	435	470	460	445
	9.83333	403	389	389	425	466	446	446	442	441	474	464	452
	9.86667	407	389	393	425	463	451	450	436	440	469	463	446
	9.9	406	395	395	429	464	453	447	440	443	470	468	445
	9.93333	408	395	395	419	465	445	448	438	436	468	461	455
	9.96667	409	394	392	432	462	445	449	443	441	471	463	446
	10	403	394	399	434	464	449	450	443	440	468	466	451
	10.0333	408	399	396	432	461	449	447	451	436	470	462	446
	10.0667	405	398	393	432	465	447	451	439	440	473	468	451
	10.1	407	398	398	430	466	449	451	442	439	468	464	451
	10.1333	408	396	395	432	470	450	450	443	440	472	459	449
	10.1667	415	399	393	431	463	451	452	447	441	471	465	452
	10.2	406	394	396	428	461	449	447	444	447	476	468	452
	10.2333	410	394	392	425	466	455	455	439	443	469	463	450
	10.2667	413	395	398	432	466	448	451	440	444	474	466	458
	10.3	410	395	395	428	466	449	454	441	444	471	469	451
	10.3333	418	398	396	435	470	456	451	447	448	473	465	450
	10.3667	412	391	393	433	471	452	454	445	443	478	470	451
	10.4	413	400	397	435	467	452	452	444	443	474	464	451
	10.4333	413	395	395	431	470	450	451	446	443	475	468	451
	10.4667	418	397	392	434	462	449	458	450	445	473	466	449
	10.5	414	399	399	427	469	450	453	449	442	476	469	456
	10.5333	414	398	401	435	472	453	453	448	446	474	469	454
	10.5667	415	394	401	430	471	454	455	446	443	478	468	455
	10.6	417	398	400	437	467	450	451	443	443	476	469	457
	10.6333	414	397	397	437	471	452	450	445	444	475	467	452
	10.6667	418	400	399	437	465	457	455	448	447	476	470	456
	10.7	415	398	397	431	473	454	453	448	447	477	469	451
	10.7333	416	401	399	438	472	456	454	448	443	477	468	451
	10.7667	415	398	396	435	469	450	453	445	445	471	473	453
	10.8	415	395	400	439	473	454	453	444	444	474	475	454
	10.8333	413	398	394	435	471	457	453	449	443	474	470	450
	10.8667	416	398	399	438	470	456	454	447	447	472	471	451
	10.9	414	398	402	434	466	456	453	446	443	474	469	454
	10.9333	416	400	398	435	470	453	451	443	448	470	466	453
	10.9667	420	399	400	437	471	457	455	453	448	473	471	453
	11	413	393	399	435	468	450	456	451	443	476	468	455
	11.0333	417	393	396	440	470	456	451	453	448	473	470	452
	11.0667	421	397	397	436	473	453	458	447	445	475	476	454
	11.1	422	402	402	434	473	457	453	455	448	475	468	453
	11.1333	419	402	401	440	470	455	452	446	445	478	469	457
	11.1667	421	398	399	433	473	451	457	449	443	472	472	452
	11.2	422	401	399	440	473	456	462	451	447	477	474	453
	11.2333	416	403	402	440	467	453	456	450	450	480	471	451
	11.2667	419	400	399	433	469	454	457	452	447	478	471	457
	11.3	421	401	399	436	466	460	453	449	447	479	469	454
	11.3333	417	397	401	440	469	460	456	451	446	475	469	460
	11.3667	417	400	397	441	471	460	458	454	446	476	473	457
	11.4	419	400	403	445	473	458	456	450	446	478	472	459
	11.4333	422	403	405	443	473	457	460	449	449	480	468	458
	11.4667	422	399	398	445	468	455	457	454	454	478	472	459
	11.5	417	399	400	441	469	457	460	454	451	482	471	458
	11.5333	417	395	400	444	470	453	457	450	451	479	472	455
	11.5667	423	402	406	449	469	455	458	449	452	476	475	455
	11.6	419	400	402	443	475	454	457	453	451	474	473	456
	11.6333	425	395	403	443	471	459	458	452	448	476	474	454
	11.6667	421	402	401	448	475	459	454	452	453	485	476	455
	11.7	424	397	404	445	474	458	462	454	451	477	470	456
	11.7333	426	399	402	448	472	454	461	449	449	475	473	455
	11.7667	427	400	403	447	471	452	455	451	447	482	475	457
	11.8	430	406	402	446	478	455	460	458	451	479	475	461
	11.8333	424	397	404	447	469	459	461	452	448	477	475	459
	11.8667	425	399	402	444	474	459	457	456	453	474	473	453
	11.9	425	401	404	445	471	458	464	454	450	474	472	455
	11.9333	425	401	405	448	475	460	461	455	452	479	477	460
	11.9667	426	402	402	448	475	462	458	457	454	479	477	454
	12	430	402	405	452	475	456	462	455	450	478	473	454
	12.0333	428	405	407	452	476	463	461	450	456	480	477	457
	12.0667	426	404	404	447	475	460	461	456	449	480	476	456
	12.1	433	401	403	448	476	459	461	450	450	480	473	465
	12.1333	426	401	403	450	477	463	460	457	452	482	474	459
	12.1667	426	400	401	452	474	455	463	456	455	485	478	457
	12.2	428	397	404	452	476	458	463	455	458	483	478	457
	12.2333	427	402	403	451	478	459	468	456	452	482	474	460
	12.2667	429	401	406	450	475	460	462	454	452	479	476	459
	12.3	428	405	405	452	478	461	462	453	457	480	479	455
	12.3333	434	403	411	451	473	460	463	460	454	479	480	464
	12.3667	435	404	407	451	481	462	464	452	455	483	480	459
	12.4	433	401	410	454	480	465	463	458	453	484	477	464
	12.4333	431	401	405	456	481	460	462	456	452	488	478	461
	12.4667	435	404	407	456	478	457	463	455	454	481	479	462
	12.5	433	397	405	458	482	462	465	456	452	484	479	458
	12.5333	433	403	408	456	477	464	464	458	454	484	477	461
	12.5667	429	403	400	454	482	459	462	457	455	480	479	461
	12.6	431	404	409	456	476	463	465	453	451	484	479	461
	12.6333	431	403	407	454	484	461	463	455	456	486	480	462
	12.6667	431	399	403	458	476	464	465	454	453	481	486	461
	12.7	430	398	409	459	477	464	461	458	458	482	480	461
	12.7333	436	405	407	458	475	461	470	460	455	485	477	459
	12.7667	430	405	408	456	478	460	468	459	455	481	479	464
	12.8	437	399	409	459	480	464	467	461	460	485	483	459
	12.8333	430	402	413	456	478	465	473	455	455	482	478	463
	12.8667	430	401	405	458	478	461	457	452	454	481	480	460
	12.9	434	403	409	457	483	462	466	457	459	485	480	460
	12.9333	431	408	407	458	479	464	468	460	456	482	476	461
	12.9667	433	402	410	457	476	462	464	460	459	484	481	460
	13	433	404	407	457	481	461	465	460	457	482	485	464
	13.0333	440	403	405	461	482	460	465	459	457	484	480	462
	13.0667	435	401	407	457	475	462	466	458	458	483	479	461
	13.1	436	403	403	459	480	464	468	459	459	485	484	456
	13.1333	435	404	413	463	477	466	463	460	459	484	487	462
	13.1667	441	405	413	461	483	467	465	462	458	485	484	458
	13.2	433	401	409	462	478	464	467	462	459	483	483	464
	13.2333	435	407	408	464	480	465	468	459	459	480	486	462
	13.2667	438	403	412	464	483	465	472	458	455	480	485	465
	13.3	437	401	409	463	483	467	469	460	456	484	480	461
	13.3333	436	403	408	464	480	462	471	457	457	487	476	462
	13.3667	443	408	407	467	480	460	470	461	460	487	477	454
	13.4	434	407	407	463	483	464	469	458	459	479	485	465
	13.4333	439	403	412	466	482	465	469	458	457	489	484	465
	13.4667	437	401	409	467	480	465	468	461	454	485	488	464
	13.5	436	408	409	466	483	465	469	454	455	486	482	463
	13.5333	437	404	410	464	482	465	469	463	456	483	480	465
	13.5667	436	402	410	462	485	467	465	461	462	485	483	465
	13.6	439	408	409	466	483	463	469	463	466	484	483	464
	13.6333	440	406	408	462	483	465	468	461	455	486	483	467
	13.6667	436	402	411	467	483	463	471	462	457	488	486	465
	13.7	439	408	406	462	479	464	469	459	460	485	483	465
	13.7333	442	408	412	464	481	462	475	465	463	484	488	464
	13.7667	439	409	409	468	482	465	465	458	457	485	485	466
	13.8	440	402	408	466	482	465	471	457	463	487	486	462
	13.8333	441	407	409	466	488	465	473	462	453	486	481	469
	13.8667	441	404	413	471	479	465	469	467	460	488	482	466
	13.9	443	401	414	465	484	466	472	460	460	485	487	463
	13.9333	437	407	413	468	484	465	471	464	460	486	478	468
	13.9667	446	409	413	466	484	463	477	463	462	489	491	463
	14	442	406	415	468	486	462	472	461	458	488	481	471
	14.0333	442	405	410	467	483	467	468	465	455	491	486	461
	14.0667	440	405	411	466	489	470	469	462	457	488	486	467
	14.1	438	403	414	470	482	465	475	463	462	486	484	467
