# Supplementary material for: Cross-talk between individual phenol-soluble modulins in Staphylococcus aureus biofilm enables rapid and efficient amyloid formation
Source: eLife. 2020 Dec 1;9:e59776. doi: 10.7554/eLife.59776 (PMC7732344; doi:10.7554/eLife.59776)
Supplement: Figure 2—figure supplement 1—source data 1. [file elife-59776-fig2-figsupp1-data1.xlsx]

## Sheet: Sup. Fig. 4a
CD spectra of 0.25 mg/mL monomeric peptides
			Normalized		Normalized		Normalized		Normalized		Normalized		Normalized		Normalized
	Wavelength (nm)	PSMα1	PSMα1	PSMα2	PSMα2	PSMα3	PSMα3	PSMα4	PSMα4	PSMβ1	PSMβ1	PSMβ2	PSMβ2	δ-toxin	δ-toxin
	250	-0.406777	-0.0118447	-0.525691	-0.0153073	-0.432785	-0.012602	-0.488124	-0.0142134	-0.488778	-0.0142325	-0.522774	-0.0152224	-0.203149	-0.00591538
	249.9	-0.409762	-0.0119316	-0.52103	-0.0151716	-0.445077	-0.0129599	-0.4811	-0.0140089	-0.49784	-0.0144963	-0.545337	-0.0158794	-0.208356	-0.006067
	249.8	-0.415065	-0.012086	-0.520958	-0.0151695	-0.45271	-0.0131822	-0.473403	-0.0137848	-0.508553	-0.0148083	-0.560278	-0.0163144	-0.211556	-0.00616018
	249.7	-0.423665	-0.0123365	-0.521058	-0.0151724	-0.460228	-0.0134011	-0.46581	-0.0135637	-0.516581	-0.015042	-0.573783	-0.0167077	-0.219217	-0.00638326
	249.6	-0.433061	-0.0126101	-0.520871	-0.015167	-0.465145	-0.0135443	-0.457914	-0.0133337	-0.521618	-0.0151887	-0.584525	-0.0170205	-0.231949	-0.00675399
	249.5	-0.446154	-0.0129913	-0.517487	-0.0150684	-0.466959	-0.0135971	-0.451244	-0.0131395	-0.525591	-0.0153044	-0.593106	-0.0172703	-0.245942	-0.00716145
	249.4	-0.460031	-0.0133954	-0.518256	-0.0150908	-0.471173	-0.0137198	-0.44681	-0.0130104	-0.526288	-0.0153247	-0.603553	-0.0175745	-0.261216	-0.0076062
	249.3	-0.471808	-0.0137383	-0.520518	-0.0151567	-0.479964	-0.0139758	-0.441172	-0.0128462	-0.531181	-0.0154672	-0.615386	-0.0179191	-0.274228	-0.00798509
	249.2	-0.482824	-0.0140591	-0.519702	-0.0151329	-0.493256	-0.0143628	-0.439882	-0.0128087	-0.539565	-0.0157113	-0.624361	-0.0181804	-0.284201	-0.00827549
	249.1	-0.496371	-0.0144535	-0.51936	-0.015123	-0.506501	-0.0147485	-0.444518	-0.0129437	-0.547757	-0.0159498	-0.633495	-0.0184464	-0.293351	-0.00854192
	249	-0.504082	-0.0146781	-0.522917	-0.0152265	-0.523187	-0.0152344	-0.445055	-0.0129593	-0.555044	-0.016162	-0.643683	-0.018743	-0.301779	-0.00878733
	248.9	-0.50692	-0.0147607	-0.526038	-0.0153174	-0.541024	-0.0157538	-0.443502	-0.0129141	-0.564251	-0.0164301	-0.653336	-0.0190241	-0.312797	-0.00910816
	248.8	-0.509102	-0.0148243	-0.530781	-0.0154555	-0.561246	-0.0163426	-0.43985	-0.0128077	-0.571208	-0.0166327	-0.664068	-0.0193366	-0.326225	-0.00949916
	248.7	-0.510077	-0.0148526	-0.535596	-0.0155957	-0.577289	-0.0168098	-0.439333	-0.0127927	-0.574056	-0.0167156	-0.674081	-0.0196282	-0.342526	-0.00997382
	248.6	-0.512445	-0.0149216	-0.54124	-0.0157601	-0.588179	-0.0171269	-0.439495	-0.0127974	-0.576323	-0.0167816	-0.682665	-0.0198781	-0.350422	-0.0102037
	248.5	-0.515114	-0.0149993	-0.547723	-0.0159488	-0.600571	-0.0174877	-0.438976	-0.0127823	-0.57929	-0.016868	-0.694188	-0.0202137	-0.359235	-0.0104604
	248.4	-0.523261	-0.0152365	-0.553033	-0.0161035	-0.610736	-0.0177837	-0.437371	-0.0127356	-0.583038	-0.0169772	-0.702729	-0.0204624	-0.368144	-0.0107198
	248.3	-0.528966	-0.0154027	-0.552267	-0.0160812	-0.624125	-0.0181735	-0.436517	-0.0127107	-0.586523	-0.0170786	-0.711889	-0.0207291	-0.377372	-0.0109885
	248.2	-0.529722	-0.0154247	-0.548682	-0.0159768	-0.638174	-0.0185826	-0.437856	-0.0127497	-0.590517	-0.0171949	-0.725268	-0.0211187	-0.390596	-0.0113735
	248.1	-0.530225	-0.0154393	-0.543309	-0.0158203	-0.65499	-0.0190723	-0.442975	-0.0128987	-0.589608	-0.0171685	-0.734911	-0.0213995	-0.404077	-0.0117661
	248	-0.530577	-0.0154496	-0.539061	-0.0156966	-0.674635	-0.0196443	-0.451551	-0.0131485	-0.588834	-0.0171459	-0.738693	-0.0215096	-0.419051	-0.0122021
	247.9	-0.535123	-0.0155819	-0.533838	-0.0155445	-0.691163	-0.0201256	-0.461313	-0.0134327	-0.581024	-0.0169185	-0.74063	-0.021566	-0.434681	-0.0126572
	247.8	-0.536601	-0.015625	-0.524172	-0.0152631	-0.703286	-0.0204786	-0.46758	-0.0136152	-0.576144	-0.0167764	-0.741599	-0.0215942	-0.449099	-0.0130771
	247.7	-0.537062	-0.0156384	-0.516221	-0.0150315	-0.718731	-0.0209283	-0.47085	-0.0137104	-0.570522	-0.0166127	-0.738658	-0.0215086	-0.463213	-0.013488
	247.6	-0.54437	-0.0158512	-0.512499	-0.0149232	-0.737592	-0.0214775	-0.472593	-0.0137612	-0.563992	-0.0164226	-0.732326	-0.0213242	-0.475955	-0.0138591
	247.5	-0.557546	-0.0162349	-0.510139	-0.0148545	-0.758596	-0.0220891	-0.473324	-0.0137825	-0.558877	-0.0162736	-0.731491	-0.0212999	-0.487461	-0.0141941
	247.4	-0.567976	-0.0165386	-0.513714	-0.0149585	-0.776981	-0.0226245	-0.475206	-0.0138373	-0.555887	-0.0161866	-0.735501	-0.0214166	-0.500771	-0.0145817
	247.3	-0.575406	-0.0167549	-0.521948	-0.0151983	-0.792078	-0.0230641	-0.474083	-0.0138046	-0.554237	-0.0161385	-0.743162	-0.0216397	-0.513436	-0.0149505
	247.2	-0.583274	-0.016984	-0.52514	-0.0152913	-0.80523	-0.023447	-0.474053	-0.0138037	-0.555229	-0.0161674	-0.755701	-0.0220048	-0.522801	-0.0152231
	247.1	-0.594615	-0.0173143	-0.526508	-0.0153311	-0.813785	-0.0236961	-0.472733	-0.0137652	-0.560797	-0.0163295	-0.767646	-0.0223527	-0.525536	-0.0153028
	247	-0.607119	-0.0176784	-0.52381	-0.0152525	-0.82486	-0.0240186	-0.467154	-0.0136028	-0.570655	-0.0166166	-0.780846	-0.022737	-0.528618	-0.0153925
	246.9	-0.61798	-0.0179946	-0.521858	-0.0151957	-0.840327	-0.024469	-0.46375	-0.0135037	-0.581774	-0.0169404	-0.787755	-0.0229382	-0.538643	-0.0156844
	246.8	-0.629621	-0.0183336	-0.527313	-0.0153545	-0.85497	-0.0248954	-0.457799	-0.0133304	-0.595188	-0.0173309	-0.792292	-0.0230703	-0.550889	-0.016041
	246.7	-0.638873	-0.018603	-0.537462	-0.0156501	-0.871297	-0.0253708	-0.455303	-0.0132577	-0.603184	-0.0175638	-0.802524	-0.0233682	-0.559904	-0.0163035
	246.6	-0.643755	-0.0187451	-0.5501	-0.0160181	-0.885727	-0.025791	-0.454445	-0.0132327	-0.608271	-0.0177119	-0.813248	-0.0236805	-0.571335	-0.0166364
	246.5	-0.653315	-0.0190235	-0.563868	-0.016419	-0.899014	-0.0261779	-0.454064	-0.0132216	-0.614182	-0.017884	-0.827018	-0.0240815	-0.581815	-0.0169415
	246.4	-0.663502	-0.0193201	-0.574836	-0.0167383	-0.915485	-0.0266575	-0.456353	-0.0132883	-0.624812	-0.0181936	-0.834841	-0.0243093	-0.592608	-0.0172558
	246.3	-0.677493	-0.0197275	-0.584383	-0.0170163	-0.932265	-0.0271461	-0.463332	-0.0134915	-0.634703	-0.0184816	-0.83851	-0.0244161	-0.608776	-0.0177266
	246.2	-0.694225	-0.0202147	-0.595254	-0.0173329	-0.951574	-0.0277083	-0.474806	-0.0138256	-0.648383	-0.0188799	-0.842896	-0.0245438	-0.62094	-0.0180808
	246.1	-0.707581	-0.0206037	-0.602054	-0.0175309	-0.972488	-0.0283173	-0.486963	-0.0141796	-0.65973	-0.0192103	-0.85459	-0.0248843	-0.631648	-0.0183926
	246	-0.7173	-0.0208867	-0.606017	-0.0176463	-0.9967	-0.0290223	-0.500588	-0.0145763	-0.672377	-0.0195786	-0.868654	-0.0252938	-0.645643	-0.0188001
	245.9	-0.727384	-0.0211803	-0.61395	-0.0178773	-1.02251	-0.0297739	-0.509517	-0.0148363	-0.684942	-0.0199444	-0.881081	-0.0256557	-0.656823	-0.0191257
	245.8	-0.74196	-0.0216047	-0.620287	-0.0180618	-1.04622	-0.0304643	-0.518724	-0.0151044	-0.694571	-0.0202248	-0.891152	-0.025949	-0.669882	-0.0195059
	245.7	-0.760054	-0.0221316	-0.628847	-0.018311	-1.06374	-0.0309744	-0.529283	-0.0154119	-0.706398	-0.0205692	-0.904615	-0.026341	-0.682451	-0.0198719
	245.6	-0.774355	-0.022548	-0.633533	-0.0184475	-1.08049	-0.0314622	-0.536707	-0.0156281	-0.720596	-0.0209826	-0.918969	-0.0267589	-0.695381	-0.0202484
	245.5	-0.793335	-0.0231007	-0.643354	-0.0187335	-1.1024	-0.0321002	-0.542031	-0.0157831	-0.734391	-0.0213843	-0.928506	-0.0270366	-0.709559	-0.0206613
	245.4	-0.813788	-0.0236962	-0.656439	-0.0191145	-1.1239	-0.0327262	-0.549729	-0.0160073	-0.75246	-0.0219105	-0.938873	-0.0273385	-0.725902	-0.0211371
	245.3	-0.834184	-0.0242901	-0.663911	-0.0193321	-1.14869	-0.0334481	-0.559084	-0.0162797	-0.772385	-0.0224906	-0.947488	-0.0275894	-0.744449	-0.0216772
	245.2	-0.851206	-0.0247858	-0.673402	-0.0196084	-1.17618	-0.0342485	-0.567855	-0.0165351	-0.793383	-0.0231021	-0.954959	-0.0278069	-0.764678	-0.0222662
	245.1	-0.872099	-0.0253942	-0.688437	-0.0200462	-1.19985	-0.0349378	-0.578903	-0.0168568	-0.815916	-0.0237582	-0.961767	-0.0280052	-0.787706	-0.0229368
	245	-0.894226	-0.0260385	-0.70434	-0.0205093	-1.22462	-0.035659	-0.589263	-0.0171584	-0.836443	-0.0243559	-0.972263	-0.0283108	-0.810477	-0.0235998
	244.9	-0.917207	-0.0267076	-0.717533	-0.0208934	-1.2543	-0.0365233	-0.596589	-0.0173717	-0.85222	-0.0248153	-0.988871	-0.0287944	-0.834896	-0.0243109
	244.8	-0.939238	-0.0273491	-0.72996	-0.0212553	-1.28543	-0.0374297	-0.601718	-0.0175211	-0.868333	-0.0252845	-1.00402	-0.0292355	-0.8592	-0.0250186
	244.7	-0.963893	-0.0280671	-0.739678	-0.0215383	-1.31899	-0.0384069	-0.61218	-0.0178257	-0.884092	-0.0257434	-1.01713	-0.0296172	-0.885688	-0.0257899
	244.6	-0.985478	-0.0286956	-0.75246	-0.0219105	-1.34995	-0.0393084	-0.62627	-0.018236	-0.899021	-0.0261781	-1.03109	-0.0300237	-0.915489	-0.0266576
	244.5	-1.00532	-0.0292733	-0.768021	-0.0223636	-1.38172	-0.0402335	-0.643401	-0.0187348	-0.916825	-0.0266965	-1.04511	-0.030432	-0.946887	-0.0275719
	244.4	-1.02797	-0.0299329	-0.787176	-0.0229213	-1.40862	-0.0410168	-0.661893	-0.0192733	-0.934169	-0.0272015	-1.06234	-0.0309337	-0.983807	-0.0286469
	244.3	-1.05296	-0.0306606	-0.805522	-0.0234555	-1.43788	-0.0418688	-0.678901	-0.0197685	-0.950357	-0.0276729	-1.07967	-0.0314383	-1.02243	-0.0297716
	244.2	-1.07888	-0.0314153	-0.826582	-0.0240688	-1.47166	-0.0428524	-0.693228	-0.0201857	-0.960956	-0.0279815	-1.09933	-0.0320108	-1.05939	-0.0308478
	244.1	-1.10358	-0.0321345	-0.849348	-0.0247317	-1.50934	-0.0439496	-0.706098	-0.0205605	-0.973764	-0.0283545	-1.12063	-0.032631	-1.09405	-0.031857
	244	-1.12404	-0.0327303	-0.868688	-0.0252948	-1.54929	-0.0451129	-0.723669	-0.0210721	-0.9895	-0.0288127	-1.13505	-0.0330509	-1.12931	-0.0328837
	243.9	-1.14449	-0.0333258	-0.883965	-0.0257397	-1.59225	-0.0463638	-0.740728	-0.0215688	-1.00586	-0.0292891	-1.14917	-0.033462	-1.16579	-0.033946
	243.8	-1.16822	-0.0340167	-0.901004	-0.0262358	-1.63539	-0.04762	-0.754063	-0.0219571	-1.02207	-0.0297611	-1.16119	-0.033812	-1.2027	-0.0350207
	243.7	-1.19569	-0.0348166	-0.915599	-0.0266608	-1.678	-0.0488607	-0.766318	-0.022314	-1.03956	-0.0302704	-1.17505	-0.0342156	-1.23562	-0.0359793
	243.6	-1.22402	-0.0356416	-0.93623	-0.0272616	-1.71696	-0.0499952	-0.777138	-0.022629	-1.05866	-0.0308265	-1.18569	-0.0345254	-1.27063	-0.0369988
	243.5	-1.25376	-0.0365075	-0.953967	-0.027778	-1.75785	-0.0511858	-0.786352	-0.0228973	-1.07379	-0.0312671	-1.19882	-0.0349078	-1.30477	-0.0379929
	243.4	-1.28674	-0.0374679	-0.971621	-0.0282921	-1.79945	-0.0523972	-0.79958	-0.0232825	-1.08676	-0.0316448	-1.21295	-0.0353192	-1.33684	-0.0389267
	243.3	-1.32231	-0.0385036	-0.993276	-0.0289226	-1.8407	-0.0535983	-0.814036	-0.0237035	-1.09972	-0.0320221	-1.22753	-0.0357438	-1.37182	-0.0399453
	243.2	-1.35525	-0.0394628	-1.01655	-0.0296003	-1.88206	-0.0548026	-0.829216	-0.0241455	-1.10625	-0.0322123	-1.24384	-0.0362187	-1.41139	-0.0410975
	243.1	-1.38731	-0.0403963	-1.03857	-0.0302415	-1.92806	-0.0561421	-0.848421	-0.0247047	-1.11715	-0.0325297	-1.26137	-0.0367291	-1.45129	-0.0422593
	243	-1.41448	-0.0411874	-1.06219	-0.0309293	-1.97538	-0.05752	-0.869778	-0.0253266	-1.13305	-0.0329926	-1.28017	-0.0372766	-1.48508	-0.0432432
	242.9	-1.44731	-0.0421434	-1.09317	-0.0318314	-2.03016	-0.0591151	-0.891353	-0.0259548	-1.14835	-0.0334382	-1.30123	-0.0378898	-1.51722	-0.0441791
	242.8	-1.47637	-0.0429896	-1.1269	-0.0328136	-2.08375	-0.0606755	-0.911528	-0.0265423	-1.16686	-0.0339771	-1.31956	-0.0384235	-1.55088	-0.0451592
	242.7	-1.50478	-0.0438168	-1.15823	-0.0337258	-2.13191	-0.0620779	-0.931056	-0.0271109	-1.18835	-0.0346029	-1.33574	-0.0388947	-1.58315	-0.0460989
	242.6	-1.53646	-0.0447393	-1.18147	-0.0344026	-2.17481	-0.0633271	-0.950573	-0.0276792	-1.20807	-0.0351771	-1.35144	-0.0393518	-1.61354	-0.0469838
	242.5	-1.57213	-0.045778	-1.20087	-0.0349675	-2.22031	-0.064652	-0.964278	-0.0280783	-1.22616	-0.0357039	-1.36939	-0.0398745	-1.64315	-0.047846
	242.4	-1.60947	-0.0468653	-1.22096	-0.0355524	-2.2709	-0.0661251	-0.976048	-0.028421	-1.24727	-0.0363186	-1.38636	-0.0403686	-1.67564	-0.048792
	242.3	-1.65419	-0.0481674	-1.24081	-0.0361305	-2.32422	-0.0676777	-0.988079	-0.0287713	-1.26873	-0.0369434	-1.40397	-0.0408814	-1.71168	-0.0498415
	242.2	-1.69947	-0.0494859	-1.26162	-0.0367364	-2.38071	-0.0693226	-1.00062	-0.0291365	-1.29185	-0.0376167	-1.42788	-0.0415776	-1.74889	-0.0509249
	242.1	-1.7442	-0.0507884	-1.27837	-0.0372241	-2.43382	-0.070869	-1.0196	-0.0296892	-1.31419	-0.0382672	-1.45275	-0.0423018	-1.78774	-0.0520562
	242	-1.79093	-0.0521491	-1.29357	-0.0376667	-2.49092	-0.0725317	-1.03918	-0.0302593	-1.33548	-0.0388871	-1.48521	-0.043247	-1.82465	-0.053131
	241.9	-1.83932	-0.0535581	-1.31148	-0.0381883	-2.54811	-0.074197	-1.05596	-0.0307479	-1.35562	-0.0394735	-1.5208	-0.0442833	-1.86754	-0.0543799
	241.8	-1.88716	-0.0549512	-1.32554	-0.0385977	-2.60637	-0.0758934	-1.07087	-0.0311821	-1.37752	-0.0401112	-1.55363	-0.0452393	-1.90974	-0.0556086
	241.7	-1.93578	-0.0563669	-1.33879	-0.0389835	-2.66464	-0.0775902	-1.08439	-0.0315757	-1.40011	-0.040769	-1.59013	-0.0463021	-1.95198	-0.0568386
	241.6	-1.98569	-0.0578202	-1.35545	-0.0394686	-2.72432	-0.0793279	-1.09562	-0.0319027	-1.42598	-0.0415223	-1.6269	-0.0473728	-1.99486	-0.0580872
	241.5	-2.0389	-0.0593696	-1.37178	-0.0399441	-2.78135	-0.0809886	-1.10188	-0.032085	-1.44909	-0.0421952	-1.66076	-0.0483587	-2.04231	-0.0594689
	241.4	-2.08933	-0.060838	-1.391	-0.0405037	-2.83664	-0.0825985	-1.11034	-0.0323314	-1.47744	-0.0430207	-1.69913	-0.049476	-2.09217	-0.0609207
	241.3	-2.14098	-0.062342	-1.419	-0.0413191	-2.89041	-0.0841642	-1.11975	-0.0326054	-1.50799	-0.0439103	-1.73823	-0.0506145	-2.14096	-0.0623414
	241.2	-2.19083	-0.0637936	-1.44835	-0.0421737	-2.94904	-0.0858714	-1.13379	-0.0330142	-1.53954	-0.044829	-1.78417	-0.0519522	-2.19041	-0.0637813
	241.1	-2.2416	-0.0652719	-1.47707	-0.04301	-3.01422	-0.0877694	-1.15107	-0.0335174	-1.56981	-0.0457104	-1.82909	-0.0532602	-2.24626	-0.0654076
	241	-2.29439	-0.0668091	-1.50858	-0.0439275	-3.084	-0.0898013	-1.17106	-0.0340994	-1.60136	-0.0466291	-1.87478	-0.0545907	-2.30126	-0.0670091
	240.9	-2.3451	-0.0682857	-1.53109	-0.044583	-3.15817	-0.091961	-1.19019	-0.0346565	-1.63527	-0.0476165	-1.92209	-0.0559683	-2.35769	-0.0686523
	240.8	-2.394	-0.0697095	-1.54903	-0.0451053	-3.23754	-0.0942721	-1.21745	-0.0354502	-1.66737	-0.0485512	-1.96486	-0.0572137	-2.42132	-0.0705051
	240.7	-2.44722	-0.0712592	-1.56829	-0.0456662	-3.32476	-0.0968118	-1.2417	-0.0361564	-1.69271	-0.0492891	-2.00984	-0.0585234	-2.4905	-0.0725195
	240.6	-2.5031	-0.0728864	-1.58753	-0.0462264	-3.41311	-0.0993844	-1.27394	-0.0370951	-1.71843	-0.050038	-2.05631	-0.0598765	-2.56403	-0.0746606
	240.5	-2.56033	-0.0745528	-1.61306	-0.0469698	-3.50269	-0.101993	-1.30696	-0.0380566	-1.74487	-0.0508079	-2.09771	-0.061082	-2.63686	-0.0767812
	240.4	-2.6141	-0.0761185	-1.64147	-0.047797	-3.59666	-0.104729	-1.33994	-0.039017	-1.7675	-0.0514668	-2.13698	-0.0622255	-2.71171	-0.0789608
	240.3	-2.67228	-0.0778126	-1.67308	-0.0487175	-3.685	-0.107301	-1.37205	-0.039952	-1.78782	-0.0520585	-2.17465	-0.0633224	-2.78571	-0.0811155
	240.2	-2.73371	-0.0796014	-1.70404	-0.049619	-3.77415	-0.109897	-1.39974	-0.0407582	-1.81071	-0.052725	-2.21495	-0.0644959	-2.85644	-0.0831751
	240.1	-2.7925	-0.0813132	-1.73169	-0.0504241	-3.85961	-0.112386	-1.42945	-0.0416234	-1.838	-0.0535197	-2.25528	-0.0656702	-2.93196	-0.0853741
	240	-2.85455	-0.08312	-1.75974	-0.0512409	-3.95163	-0.115065	-1.45718	-0.0424308	-1.86826	-0.0544008	-2.2988	-0.0669375	-3.00412	-0.0874753
	239.9	-2.9171	-0.0849414	-1.78388	-0.0519438	-4.04519	-0.11779	-1.48325	-0.0431899	-1.89636	-0.055219	-2.34695	-0.0683395	-3.07297	-0.0894801
	239.8	-2.97896	-0.0867427	-1.80465	-0.0525486	-4.13945	-0.120534	-1.51159	-0.0440151	-1.92537	-0.0560638	-2.39753	-0.0698123	-3.14313	-0.091523
	239.7	-3.04828	-0.0887612	-1.82952	-0.0532728	-4.23589	-0.123343	-1.53667	-0.0447454	-1.95648	-0.0569696	-2.45709	-0.0715466	-3.21227	-0.0935363
	239.6	-3.11583	-0.0907281	-1.85655	-0.0540598	-4.33439	-0.126211	-1.55773	-0.0453587	-1.98804	-0.0578886	-2.52014	-0.0733825	-3.28269	-0.0955868
	239.5	-3.18449	-0.0927274	-1.87848	-0.0546984	-4.4335	-0.129097	-1.57649	-0.0459049	-2.0191	-0.058793	-2.58412	-0.0752455	-3.3595	-0.0978234
	239.4	-3.2542	-0.0947572	-1.90444	-0.0554543	-4.53859	-0.132157	-1.59406	-0.0464165	-2.05455	-0.0598253	-2.64552	-0.0770334	-3.43861	-0.100127
	239.3	-3.32286	-0.0967565	-1.92596	-0.0560809	-4.6436	-0.135214	-1.61099	-0.0469095	-2.09003	-0.0608584	-2.70605	-0.078796	-3.52008	-0.102499
	239.2	-3.3917	-0.098761	-1.94939	-0.0567632	-4.75245	-0.138384	-1.63143	-0.0475047	-2.1292	-0.061999	-2.76865	-0.0806188	-3.61231	-0.105185
	239.1	-3.45846	-0.100705	-1.98086	-0.0576796	-4.865	-0.141661	-1.65438	-0.048173	-2.16629	-0.063079	-2.8323	-0.0824722	-3.70842	-0.107983
	239	-3.53218	-0.102852	-2.01296	-0.0586143	-4.9803	-0.145019	-1.68008	-0.0489213	-2.19998	-0.06406	-2.89572	-0.0843188	-3.81032	-0.110951
	238.9	-3.60982	-0.105112	-2.04627	-0.0595842	-5.09712	-0.14842	-1.70919	-0.0497689	-2.23219	-0.0649979	-2.9591	-0.0861644	-3.90945	-0.113837
	238.8	-3.69031	-0.107456	-2.07496	-0.0604196	-5.21883	-0.151964	-1.73694	-0.050577	-2.26675	-0.0660042	-3.02717	-0.0881465	-4.00551	-0.116634
	238.7	-3.77734	-0.10999	-2.10663	-0.0613418	-5.34053	-0.155508	-1.75829	-0.0511987	-2.29745	-0.0668982	-3.09285	-0.090059	-4.09987	-0.119382
	238.6	-3.86309	-0.112487	-2.13807	-0.0622573	-5.46084	-0.159011	-1.77882	-0.0517965	-2.32644	-0.0677423	-3.15981	-0.0920087	-4.19599	-0.122181
	238.5	-3.95178	-0.11507	-2.16481	-0.0630359	-5.58295	-0.162567	-1.80008	-0.0524155	-2.35757	-0.0686488	-3.22962	-0.0940415	-4.29542	-0.125076
	238.4	-4.03899	-0.117609	-2.19257	-0.0638442	-5.70848	-0.166222	-1.82064	-0.0530142	-2.39029	-0.0696015	-3.2991	-0.0960646	-4.39863	-0.128081
	238.3	-4.13298	-0.120346	-2.22516	-0.0647932	-5.83201	-0.169819	-1.84311	-0.0536685	-2.4268	-0.0706646	-3.36277	-0.0979186	-4.50622	-0.131214
	238.2	-4.22824	-0.12312	-2.25957	-0.0657952	-5.95573	-0.173422	-1.87271	-0.0545304	-2.46752	-0.0718503	-3.41875	-0.0995487	-4.61574	-0.134403
	238.1	-4.32439	-0.125919	-2.29577	-0.0668492	-6.08151	-0.177084	-1.90595	-0.0554983	-2.50908	-0.0730605	-3.47966	-0.101322	-4.72364	-0.137545
	238	-4.4167	-0.128607	-2.33273	-0.0679255	-6.20988	-0.180822	-1.93931	-0.0564697	-2.54993	-0.07425	-3.54344	-0.103179	-4.83137	-0.140682
	237.9	-4.51068	-0.131344	-2.3664	-0.0689059	-6.34515	-0.184761	-1.97322	-0.0574571	-2.58907	-0.0753897	-3.61469	-0.105254	-4.93557	-0.143716
	237.8	-4.6067	-0.13414	-2.39604	-0.0697689	-6.48247	-0.188759	-2.00579	-0.0584055	-2.62856	-0.0765396	-3.68361	-0.107261	-5.0391	-0.146731
	237.7	-4.7037	-0.136964	-2.42508	-0.0706145	-6.61979	-0.192758	-2.03421	-0.059233	-2.67015	-0.0777506	-3.75407	-0.109313	-5.14533	-0.149824
	237.6	-4.80133	-0.139807	-2.45978	-0.071625	-6.7589	-0.196809	-2.06177	-0.0600355	-2.71395	-0.079026	-3.82234	-0.111301	-5.25121	-0.152907
	237.5	-4.90022	-0.142687	-2.49351	-0.0726071	-6.8995	-0.200903	-2.08546	-0.0607253	-2.76361	-0.080472	-3.89076	-0.113293	-5.36083	-0.156099
	237.4	-5.00118	-0.145627	-2.53071	-0.0736903	-7.03796	-0.204934	-2.11116	-0.0614737	-2.81618	-0.0820028	-3.96174	-0.11536	-5.47743	-0.159494
	237.3	-5.10757	-0.148724	-2.57159	-0.0748807	-7.17886	-0.209037	-2.13516	-0.0621725	-2.8668	-0.0834767	-4.03535	-0.117503	-5.59241	-0.162842
	237.2	-5.21005	-0.151709	-2.61315	-0.0760908	-7.32319	-0.21324	-2.16419	-0.0630178	-2.91363	-0.0848404	-4.10899	-0.119647	-5.70561	-0.166138
	237.1	-5.3076	-0.154549	-2.65884	-0.0774213	-7.47185	-0.217569	-2.19439	-0.0638972	-2.95821	-0.0861385	-4.1866	-0.121907	-5.82125	-0.169506
	237	-5.40417	-0.157361	-2.70376	-0.0787293	-7.62171	-0.221932	-2.22705	-0.0648482	-3.00384	-0.0874671	-4.25962	-0.124033	-5.94729	-0.173176
	236.9	-5.50498	-0.160296	-2.74348	-0.0798859	-7.77391	-0.226364	-2.26669	-0.0660025	-3.0558	-0.0889801	-4.33427	-0.126207	-6.07622	-0.17693
	236.8	-5.60872	-0.163317	-2.78505	-0.0810963	-7.92525	-0.230771	-2.30744	-0.0671891	-3.1091	-0.0905321	-4.40997	-0.128411	-6.21111	-0.180858
	236.7	-5.71337	-0.166364	-2.82236	-0.0821827	-8.08235	-0.235345	-2.34683	-0.068336	-3.1587	-0.0919764	-4.48499	-0.130596	-6.34344	-0.184711
	236.6	-5.82337	-0.169567	-2.86259	-0.0833542	-8.24724	-0.240147	-2.38757	-0.0695223	-3.21016	-0.0934748	-4.56246	-0.132852	-6.47818	-0.188634
	236.5	-5.93914	-0.172938	-2.90273	-0.084523	-8.41633	-0.24507	-2.42785	-0.0706952	-3.2676	-0.0951474	-4.64124	-0.135146	-6.61705	-0.192678
	236.4	-6.05829	-0.176408	-2.94426	-0.0857323	-8.58522	-0.249988	-2.46859	-0.0718815	-3.32648	-0.0968619	-4.72213	-0.137501	-6.76132	-0.196879
	236.3	-6.17566	-0.179826	-2.98445	-0.0869025	-8.75134	-0.254825	-2.50442	-0.0729248	-3.38498	-0.0985653	-4.80198	-0.139826	-6.91373	-0.201317
	236.2	-6.28987	-0.183151	-3.02248	-0.0880099	-8.92012	-0.25974	-2.541	-0.07399	-3.44592	-0.10034	-4.8853	-0.142252	-7.06928	-0.205846
	236.1	-6.41204	-0.186709	-3.06305	-0.0891912	-9.09769	-0.264911	-2.57409	-0.0749535	-3.5053	-0.102069	-4.96953	-0.144705	-7.22512	-0.210384
	236	-6.53332	-0.19024	-3.10653	-0.0904573	-9.27533	-0.270083	-2.60675	-0.0759045	-3.56821	-0.103901	-5.05578	-0.147216	-7.38409	-0.215013
	235.9	-6.65539	-0.193795	-3.15742	-0.0919391	-9.45039	-0.275181	-2.63755	-0.0768013	-3.63462	-0.105834	-5.14789	-0.149899	-7.54523	-0.219705
	235.8	-6.78357	-0.197527	-3.21584	-0.0936402	-9.62503	-0.280266	-2.67249	-0.0778187	-3.70154	-0.107783	-5.2394	-0.152563	-7.70189	-0.224267
	235.7	-6.90967	-0.201199	-3.27296	-0.0953035	-9.80299	-0.285448	-2.71008	-0.0789133	-3.76569	-0.109651	-5.33207	-0.155262	-7.86018	-0.228876
	235.6	-7.03207	-0.204763	-3.32243	-0.096744	-9.98703	-0.290807	-2.75664	-0.0802691	-3.83277	-0.111604	-5.42705	-0.158027	-8.02143	-0.233572
	235.5	-7.15392	-0.208311	-3.3758	-0.098298	-10.1766	-0.296327	-2.79861	-0.0814912	-3.89962	-0.113551	-5.52212	-0.160796	-8.18379	-0.238299
	235.4	-7.28332	-0.212079	-3.4328	-0.0999578	-10.3656	-0.30183	-2.83378	-0.0825153	-3.96515	-0.115459	-5.6195	-0.163631	-8.34836	-0.243091
	235.3	-7.41128	-0.215805	-3.4881	-0.101568	-10.5574	-0.307415	-2.8652	-0.0834302	-4.03044	-0.11736	-5.71774	-0.166492	-8.51189	-0.247853
	235.2	-7.53634	-0.219446	-3.54078	-0.103102	-10.7565	-0.313212	-2.89764	-0.0843748	-4.09673	-0.11929	-5.81683	-0.169377	-8.67835	-0.2527
	235.1	-7.66129	-0.223085	-3.59341	-0.104634	-10.9621	-0.319199	-2.92792	-0.0852565	-4.15951	-0.121118	-5.91238	-0.172159	-8.84782	-0.257635
	235	-7.79021	-0.226839	-3.64881	-0.106248	-11.1737	-0.325361	-2.95837	-0.0861431	-4.22458	-0.123013	-6.00626	-0.174893	-9.02056	-0.262665
	234.9	-7.92054	-0.230634	-3.706	-0.107913	-11.382	-0.331426	-2.99328	-0.0871596	-4.29058	-0.124935	-6.0965	-0.177521	-9.19349	-0.2677
	234.8	-8.05654	-0.234594	-3.76552	-0.109646	-11.5964	-0.337669	-3.03093	-0.088256	-4.35977	-0.12695	-6.19106	-0.180274	-9.37126	-0.272876
	234.7	-8.20024	-0.238778	-3.823	-0.11132	-11.8126	-0.343964	-3.06302	-0.0891904	-4.42642	-0.12889	-6.28504	-0.183011	-9.55111	-0.278113
	234.6	-8.34486	-0.242989	-3.8764	-0.112875	-12.027	-0.350207	-3.09591	-0.0901481	-4.49379	-0.130852	-6.38041	-0.185788	-9.73453	-0.283454
	234.5	-8.49341	-0.247315	-3.92916	-0.114411	-12.2414	-0.35645	-3.13316	-0.0912327	-4.5697	-0.133063	-6.47662	-0.188589	-9.91272	-0.288643
	234.4	-8.64299	-0.25167	-3.98612	-0.11607	-12.4588	-0.362781	-3.17258	-0.0923806	-4.64895	-0.13537	-6.58122	-0.191635	-10.0923	-0.293872
	234.3	-8.79205	-0.256011	-4.04209	-0.117699	-12.6741	-0.36905	-3.20685	-0.0933785	-4.72876	-0.137694	-6.68465	-0.194647	-10.2724	-0.299116
	234.2	-8.93881	-0.260284	-4.10913	-0.119651	-12.8865	-0.375235	-3.23889	-0.0943114	-4.806	-0.139943	-6.78635	-0.197608	-10.456	-0.304462
	234.1	-9.09124	-0.264723	-4.1786	-0.121674	-13.0948	-0.3813	-3.2746	-0.0953512	-4.88562	-0.142262	-6.88837	-0.200579	-10.6421	-0.309881
	234	-9.24786	-0.269283	-4.24435	-0.123589	-13.301	-0.387304	-3.31215	-0.0964446	-4.97291	-0.144803	-6.98991	-0.203535	-10.8319	-0.315408
	233.9	-9.40238	-0.273783	-4.31104	-0.125531	-13.5156	-0.393553	-3.34324	-0.0973499	-5.0603	-0.147348	-7.09165	-0.206498	-11.0269	-0.321086
	233.8	-9.56034	-0.278382	-4.37405	-0.127366	-13.7339	-0.39991	-3.37384	-0.098241	-5.14373	-0.149777	-7.19812	-0.209598	-11.216	-0.326592
	233.7	-9.71746	-0.282957	-4.43781	-0.129222	-13.9546	-0.406336	-3.40666	-0.0991966	-5.23012	-0.152293	-7.30692	-0.212766	-11.4071	-0.332157
	233.6	-9.87704	-0.287604	-4.49826	-0.130982	-14.1768	-0.412806	-3.44124	-0.100204	-5.31816	-0.154857	-7.42049	-0.216073	-11.6007	-0.337794
	233.5	-10.039	-0.29232	-4.55804	-0.132723	-14.3984	-0.419259	-3.48109	-0.101364	-5.40235	-0.157308	-7.5311	-0.219294	-11.7915	-0.34335
	233.4	-10.204	-0.297125	-4.6163	-0.134419	-14.6291	-0.425977	-3.52358	-0.102601	-5.48652	-0.159759	-7.63918	-0.222441	-11.9887	-0.349092
	233.3	-10.3718	-0.302011	-4.67338	-0.136082	-14.8582	-0.432648	-3.5627	-0.10374	-5.57637	-0.162375	-7.74532	-0.225532	-12.194	-0.35507
	233.2	-10.5446	-0.307042	-4.73496	-0.137875	-15.0937	-0.439505	-3.59919	-0.104803	-5.66288	-0.164894	-7.84962	-0.228569	-12.3994	-0.361051
	233.1	-10.7149	-0.312001	-4.79402	-0.139594	-15.3352	-0.446537	-3.63721	-0.10591	-5.75055	-0.167447	-7.95119	-0.231526	-12.605	-0.367038
	233	-10.8834	-0.316908	-4.85098	-0.141253	-15.5778	-0.453601	-3.67994	-0.107154	-5.83752	-0.169979	-8.05414	-0.234524	-12.8152	-0.373159
	232.9	-11.0495	-0.321744	-4.91043	-0.142984	-15.8189	-0.460622	-3.72356	-0.108424	-5.92142	-0.172423	-8.15317	-0.237408	-13.0249	-0.379265
	232.8	-11.2157	-0.326584	-4.97784	-0.144947	-16.0587	-0.467604	-3.76175	-0.109536	-6.0077	-0.174935	-8.25071	-0.240248	-13.2352	-0.385388
	232.7	-11.3886	-0.331618	-5.05361	-0.147153	-16.3039	-0.474744	-3.8011	-0.110682	-6.09156	-0.177377	-8.34842	-0.243093	-13.444	-0.391468
	232.6	-11.5618	-0.336662	-5.13457	-0.149511	-16.5494	-0.481893	-3.84459	-0.111948	-6.17217	-0.179724	-8.45236	-0.24612	-13.649	-0.397438
	232.5	-11.7363	-0.341743	-5.20768	-0.15164	-16.7969	-0.4891	-3.88923	-0.113248	-6.2488	-0.181955	-8.55939	-0.249236	-13.8523	-0.403357
	232.4	-11.903	-0.346597	-5.28126	-0.153782	-17.0407	-0.496199	-3.92938	-0.114417	-6.32891	-0.184288	-8.66782	-0.252393	-14.058	-0.409347
	232.3	-12.0731	-0.35155	-5.35109	-0.155815	-17.2867	-0.503362	-3.96589	-0.115481	-6.41298	-0.186736	-8.77654	-0.255559	-14.2673	-0.415442
	232.2	-12.2411	-0.356442	-5.42194	-0.157878	-17.5398	-0.510732	-3.99623	-0.116364	-6.49534	-0.189134	-8.88455	-0.258704	-14.4887	-0.421888
	232.1	-12.406	-0.361243	-5.48874	-0.159824	-17.7911	-0.518049	-4.02943	-0.117331	-6.58242	-0.19167	-8.99616	-0.261954	-14.7144	-0.42846
	232	-12.5732	-0.366112	-5.55267	-0.161685	-18.0435	-0.525399	-4.07142	-0.118553	-6.66715	-0.194137	-9.10863	-0.265229	-14.9442	-0.435152
	231.9	-12.7422	-0.371033	-5.61772	-0.163579	-18.2937	-0.532684	-4.12093	-0.119995	-6.74767	-0.196482	-9.21517	-0.268331	-15.171	-0.441756
	231.8	-12.9133	-0.376015	-5.68623	-0.165574	-18.548	-0.540089	-4.17699	-0.121627	-6.83339	-0.198978	-9.32254	-0.271458	-15.392	-0.448191
	231.7	-13.077	-0.380782	-5.75926	-0.167701	-18.7999	-0.547424	-4.23745	-0.123388	-6.91649	-0.201397	-9.43337	-0.274685	-15.6065	-0.454437
	231.6	-13.2375	-0.385455	-5.83102	-0.16979	-19.0552	-0.554858	-4.29023	-0.124925	-6.99785	-0.203766	-9.54817	-0.278028	-15.8266	-0.460846
	231.5	-13.4015	-0.390231	-5.90876	-0.172054	-19.3129	-0.562362	-4.33376	-0.126192	-7.08213	-0.206221	-9.66644	-0.281472	-16.0497	-0.467342
	231.4	-13.5641	-0.394965	-5.98359	-0.174233	-19.5728	-0.569929	-4.37166	-0.127296	-7.16816	-0.208726	-9.7847	-0.284915	-16.2702	-0.473763
	231.3	-13.7347	-0.399933	-6.062	-0.176516	-19.8311	-0.577451	-4.40573	-0.128288	-7.25642	-0.211296	-9.89958	-0.28826	-16.4884	-0.480116
	231.2	-13.9149	-0.40518	-6.14535	-0.178943	-20.0815	-0.584742	-4.44456	-0.129419	-7.34364	-0.213835	-10.0148	-0.291615	-16.7128	-0.486651
	231.1	-14.0931	-0.410369	-6.22682	-0.181315	-20.3281	-0.591923	-4.48748	-0.130668	-7.43448	-0.21648	-10.1346	-0.295104	-16.9429	-0.493351
	231	-14.2685	-0.415476	-6.30784	-0.183674	-20.5712	-0.599001	-4.53574	-0.132074	-7.52386	-0.219083	-10.2597	-0.298746	-17.1732	-0.500057
	230.9	-14.4447	-0.420607	-6.38485	-0.185917	-20.8167	-0.60615	-4.5865	-0.133552	-7.61339	-0.22169	-10.3854	-0.302407	-17.4008	-0.506684
	230.8	-14.6217	-0.425761	-6.45743	-0.18803	-21.0695	-0.613511	-4.63057	-0.134835	-7.70621	-0.224393	-10.5053	-0.305898	-17.6283	-0.513309
	230.7	-14.8016	-0.430999	-6.53141	-0.190184	-21.3255	-0.620965	-4.67424	-0.136107	-7.79476	-0.226971	-10.6257	-0.309404	-17.8536	-0.519869
	230.6	-14.9753	-0.436057	-6.6046	-0.192316	-21.5821	-0.628437	-4.72277	-0.13752	-7.8887	-0.229707	-10.7479	-0.312962	-18.0785	-0.526418
	230.5	-15.1537	-0.441252	-6.67523	-0.194372	-21.8359	-0.635827	-4.77092	-0.138922	-7.98596	-0.232539	-10.8671	-0.316433	-18.3037	-0.532975
	230.4	-15.3338	-0.446496	-6.7402	-0.196264	-22.0977	-0.643451	-4.82274	-0.140431	-8.08112	-0.23531	-10.9861	-0.319898	-18.5245	-0.539405
	230.3	-15.5146	-0.451761	-6.80339	-0.198104	-22.3625	-0.651161	-4.87022	-0.141813	-8.1712	-0.237933	-11.1119	-0.323561	-18.7432	-0.545773
	230.2	-15.6924	-0.456938	-6.8694	-0.200026	-22.628	-0.658892	-4.9146	-0.143105	-8.25626	-0.240409	-11.2338	-0.327111	-18.9614	-0.552126
	230.1	-15.8625	-0.461891	-6.94315	-0.202174	-22.8934	-0.66662	-4.95537	-0.144293	-8.33926	-0.242826	-11.3509	-0.33052	-19.1785	-0.558448
	230	-16.0368	-0.466967	-7.01647	-0.204309	-23.1532	-0.674185	-5.00306	-0.145681	-8.42748	-0.245395	-11.4647	-0.333834	-19.3978	-0.564834
	229.9	-16.2049	-0.471861	-7.08167	-0.206207	-23.412	-0.681721	-5.0498	-0.147042	-8.5202	-0.248095	-11.5718	-0.336953	-19.6143	-0.571138
	229.8	-16.3695	-0.476654	-7.15257	-0.208272	-23.6675	-0.689161	-5.09109	-0.148245	-8.60261	-0.250495	-11.6792	-0.34008	-19.8199	-0.577125
	229.7	-16.5322	-0.481392	-7.22063	-0.210253	-23.9193	-0.696493	-5.13359	-0.149482	-8.68312	-0.252839	-11.787	-0.343219	-20.0186	-0.58291
	229.6	-16.6961	-0.486164	-7.29095	-0.212301	-24.1719	-0.703848	-5.17605	-0.150718	-8.75856	-0.255036	-11.9003	-0.346518	-20.2145	-0.588615
	229.5	-16.8579	-0.490876	-7.35837	-0.214264	-24.4179	-0.711011	-5.22043	-0.152011	-8.83321	-0.257209	-12.013	-0.3498	-20.413	-0.594395
	229.4	-17.0201	-0.495599	-7.42885	-0.216317	-24.6687	-0.718314	-5.26779	-0.15339	-8.91172	-0.259495	-12.1206	-0.352933	-20.6098	-0.600125
	229.3	-17.1881	-0.500491	-7.49744	-0.218314	-24.9252	-0.725783	-5.30941	-0.154602	-8.99131	-0.261813	-12.2245	-0.355958	-20.8091	-0.605929
	229.2	-17.3573	-0.505417	-7.56481	-0.220275	-25.1839	-0.733316	-5.34997	-0.155783	-9.06771	-0.264038	-12.3265	-0.358928	-21.0141	-0.611898
	229.1	-17.5254	-0.510312	-7.62626	-0.222065	-25.4423	-0.74084	-5.39785	-0.157177	-9.14259	-0.266218	-12.4299	-0.361939	-21.2173	-0.617815
	229	-17.6989	-0.515364	-7.68287	-0.223713	-25.6963	-0.748236	-5.4397	-0.158396	-9.21567	-0.268346	-12.5307	-0.364874	-21.4103	-0.623435
	228.9	-17.8748	-0.520486	-7.73614	-0.225264	-25.9412	-0.755367	-5.4753	-0.159432	-9.28893	-0.270479	-12.6256	-0.367638	-21.5987	-0.62892
	228.8	-18.0486	-0.525547	-7.7927	-0.226911	-26.1841	-0.76244	-5.51954	-0.16072	-9.36708	-0.272755	-12.7205	-0.370401	-21.7832	-0.634293
	228.7	-18.2167	-0.530442	-7.84737	-0.228503	-26.4226	-0.769385	-5.56829	-0.16214	-9.45614	-0.275348	-12.8116	-0.373054	-21.9669	-0.639642
	228.6	-18.3865	-0.535386	-7.90142	-0.230077	-26.6624	-0.776367	-5.61484	-0.163495	-9.54413	-0.27791	-12.8975	-0.375555	-22.1484	-0.644927
	228.5	-18.5625	-0.540511	-7.95901	-0.231754	-26.8989	-0.783254	-5.66064	-0.164829	-9.62708	-0.280326	-12.9884	-0.378202	-22.3269	-0.650124
	228.4	-18.7361	-0.545566	-8.01801	-0.233472	-27.1255	-0.789852	-5.70652	-0.166165	-9.70918	-0.282716	-13.0876	-0.38109	-22.5056	-0.655328
	228.3	-18.91	-0.55063	-8.07371	-0.235094	-27.3536	-0.796494	-5.7602	-0.167728	-9.78777	-0.285005	-13.1856	-0.383944	-22.676	-0.66029
	228.2	-19.0793	-0.555559	-8.12981	-0.236727	-27.5855	-0.803247	-5.81059	-0.169195	-9.865	-0.287253	-13.2884	-0.386937	-22.8395	-0.665051
	228.1	-19.2401	-0.560242	-8.18675	-0.238385	-27.8108	-0.809807	-5.85974	-0.170626	-9.93767	-0.289369	-13.3917	-0.389945	-22.9939	-0.669546
	228	-19.3965	-0.564796	-8.24135	-0.239975	-28.0358	-0.816359	-5.91515	-0.17224	-10.0124	-0.291545	-13.4901	-0.392811	-23.1504	-0.674104
	227.9	-19.5504	-0.569277	-8.29844	-0.241638	-28.2688	-0.823143	-5.96759	-0.173767	-10.0854	-0.293671	-13.5875	-0.395647	-23.3139	-0.678864
	227.8	-19.6966	-0.573534	-8.35965	-0.24342	-28.4991	-0.829849	-6.01522	-0.175154	-10.1511	-0.295584	-13.6783	-0.398291	-23.4773	-0.683622
	227.7	-19.844	-0.577826	-8.41699	-0.24509	-28.7197	-0.836273	-6.06315	-0.176549	-10.2154	-0.297457	-13.7692	-0.400938	-23.6378	-0.688296
	227.6	-19.9924	-0.582147	-8.47484	-0.246774	-28.9357	-0.842562	-6.11984	-0.1782	-10.2829	-0.299422	-13.8605	-0.403596	-23.8016	-0.693065
	227.5	-20.1409	-0.586472	-8.52739	-0.248304	-29.1484	-0.848756	-6.16918	-0.179637	-10.3458	-0.301254	-13.9607	-0.406514	-23.9624	-0.697748
	227.4	-20.2812	-0.590557	-8.57792	-0.249776	-29.3625	-0.85499	-6.21011	-0.180829	-10.4077	-0.303056	-14.055	-0.40926	-24.1162	-0.702226
	227.3	-20.4231	-0.594689	-8.6285	-0.251248	-29.5717	-0.861082	-6.25064	-0.182009	-10.4659	-0.304751	-14.1547	-0.412163	-24.2619	-0.706469
	227.2	-20.5624	-0.598745	-8.67647	-0.252645	-29.7696	-0.866844	-6.29103	-0.183185	-10.5212	-0.306361	-14.2483	-0.414888	-24.406	-0.710665
	227.1	-20.6987	-0.602714	-8.7256	-0.254076	-29.97	-0.87268	-6.33131	-0.184358	-10.5768	-0.30798	-14.3381	-0.417503	-24.5506	-0.714875
	227	-20.8311	-0.606569	-8.77668	-0.255563	-30.1739	-0.878617	-6.36722	-0.185404	-10.6315	-0.309573	-14.4218	-0.41994	-24.6865	-0.718832
	226.9	-20.9622	-0.610387	-8.83258	-0.257191	-30.3781	-0.884563	-6.40723	-0.186569	-10.6786	-0.310944	-14.4995	-0.422203	-24.8236	-0.722824
	226.8	-21.0941	-0.614227	-8.89138	-0.258903	-30.5722	-0.890215	-6.44217	-0.187586	-10.7316	-0.312487	-14.5835	-0.424649	-24.9581	-0.726741
	226.7	-21.2246	-0.618027	-8.95295	-0.260696	-30.7579	-0.895622	-6.47334	-0.188494	-10.7858	-0.314066	-14.6705	-0.427182	-25.0892	-0.730558
	226.6	-21.3517	-0.621728	-9.0118	-0.26241	-30.9419	-0.90098	-6.50098	-0.189298	-10.8392	-0.315621	-14.756	-0.429672	-25.2173	-0.734288
	226.5	-21.4838	-0.625575	-9.07524	-0.264257	-31.1218	-0.906218	-6.52956	-0.190131	-10.8902	-0.317106	-14.8414	-0.432158	-25.3466	-0.738053
	226.4	-21.6184	-0.629494	-9.13356	-0.265955	-31.2997	-0.911398	-6.55453	-0.190858	-10.9383	-0.318506	-14.9285	-0.434695	-25.4769	-0.741848
	226.3	-21.7541	-0.633445	-9.18874	-0.267562	-31.4697	-0.916349	-6.56925	-0.191286	-10.9918	-0.320064	-15.0125	-0.437141	-25.6008	-0.745455
	226.2	-21.8922	-0.637467	-9.24473	-0.269192	-31.635	-0.921162	-6.57805	-0.191543	-11.0463	-0.321651	-15.0978	-0.439624	-25.7199	-0.748923
	226.1	-22.0301	-0.641482	-9.29506	-0.270658	-31.7983	-0.925917	-6.59028	-0.191899	-11.0943	-0.323049	-15.1802	-0.442024	-25.8324	-0.752199
	226	-22.1589	-0.645233	-9.33397	-0.271791	-31.9565	-0.930523	-6.605	-0.192327	-11.1423	-0.324446	-15.2515	-0.4441	-25.9446	-0.755466
	225.9	-22.2881	-0.648995	-9.37305	-0.272929	-32.1147	-0.93513	-6.61888	-0.192731	-11.1924	-0.325905	-15.3178	-0.44603	-26.0595	-0.758812
	225.8	-22.4191	-0.652809	-9.41113	-0.274037	-32.2621	-0.939422	-6.63676	-0.193252	-11.2443	-0.327416	-15.3833	-0.447938	-26.1641	-0.761858
	225.7	-22.5438	-0.65644	-9.4509	-0.275195	-32.4054	-0.943595	-6.65902	-0.1939	-11.2966	-0.328939	-15.4495	-0.449865	-26.2659	-0.764822
	225.6	-22.6552	-0.659684	-9.49067	-0.276353	-32.5431	-0.947604	-6.69027	-0.19481	-11.3526	-0.33057	-15.513	-0.451714	-26.3568	-0.767469
	225.5	-22.7666	-0.662928	-9.5315	-0.277542	-32.6739	-0.951413	-6.72755	-0.195896	-11.4048	-0.33209	-15.5789	-0.453633	-26.4392	-0.769868
	225.4	-22.8758	-0.666108	-9.57117	-0.278698	-32.7907	-0.954814	-6.76276	-0.196921	-11.4562	-0.333587	-15.6473	-0.455625	-26.5193	-0.772201
	225.3	-22.9819	-0.669197	-9.61123	-0.279864	-32.9074	-0.958212	-6.79523	-0.197866	-11.5076	-0.335083	-15.7241	-0.457861	-26.5916	-0.774306
	225.2	-23.0862	-0.672234	-9.65499	-0.281138	-33.0199	-0.961488	-6.81832	-0.198539	-11.5541	-0.336437	-15.7965	-0.459969	-26.6668	-0.776496
	225.1	-23.1907	-0.675277	-9.6998	-0.282443	-33.1239	-0.964516	-6.83991	-0.199168	-11.5966	-0.337675	-15.8612	-0.461853	-26.746	-0.778802
	225	-23.2968	-0.678366	-9.74279	-0.283695	-33.2262	-0.967495	-6.85811	-0.199697	-11.6506	-0.339247	-15.9205	-0.46358	-26.8254	-0.781114
	224.9	-23.3975	-0.681299	-9.7787	-0.28474	-33.3262	-0.970407	-6.87418	-0.200165	-11.7043	-0.340811	-15.9782	-0.46526	-26.8998	-0.78328
	224.8	-23.4978	-0.684219	-9.8109	-0.285678	-33.4194	-0.973121	-6.89674	-0.200822	-11.7513	-0.34218	-16.0359	-0.46694	-26.9715	-0.785368
	224.7	-23.5971	-0.687111	-9.84144	-0.286567	-33.5095	-0.975744	-6.92488	-0.201642	-11.7972	-0.343516	-16.0912	-0.468551	-27.0398	-0.787357
	224.6	-23.6887	-0.689778	-9.86628	-0.287291	-33.5928	-0.97817	-6.95049	-0.202387	-11.8312	-0.344506	-16.1431	-0.470062	-27.0976	-0.78904
	224.5	-23.7734	-0.692244	-9.89552	-0.288142	-33.678	-0.980651	-6.97033	-0.202965	-11.8608	-0.345368	-16.192	-0.471486	-27.1413	-0.790312
	224.4	-23.8639	-0.69488	-9.91986	-0.288851	-33.7724	-0.9834	-6.98526	-0.2034	-11.8896	-0.346207	-16.2379	-0.472822	-27.1745	-0.791279
	224.3	-23.9624	-0.697748	-9.94354	-0.28954	-33.8614	-0.985991	-6.99698	-0.203741	-11.9288	-0.347348	-16.2773	-0.47397	-27.2067	-0.792217
	224.2	-24.0556	-0.700462	-9.97373	-0.290419	-33.9441	-0.988399	-7.01013	-0.204124	-11.9643	-0.348382	-16.322	-0.475271	-27.2454	-0.793344
	224.1	-24.1393	-0.702899	-10.007	-0.291388	-34.017	-0.990522	-7.02755	-0.204631	-11.9939	-0.349244	-16.3719	-0.476724	-27.2842	-0.794473
	224	-24.2122	-0.705021	-10.0352	-0.292209	-34.0903	-0.992656	-7.0429	-0.205078	-12.0278	-0.350231	-16.413	-0.477921	-27.3256	-0.795679
	223.9	-24.2872	-0.707205	-10.054	-0.292757	-34.1624	-0.994756	-7.05535	-0.205441	-12.0584	-0.351122	-16.4528	-0.47908	-27.3654	-0.796838
	223.8	-24.3567	-0.709229	-10.0815	-0.293558	-34.2203	-0.996442	-7.06663	-0.205769	-12.0895	-0.352027	-16.4871	-0.480079	-27.3887	-0.797516
	223.7	-24.4191	-0.711046	-10.1125	-0.29446	-34.2533	-0.997403	-7.07436	-0.205994	-12.1178	-0.352851	-16.5128	-0.480827	-27.4059	-0.798017
	223.6	-24.4783	-0.71277	-10.1406	-0.295278	-34.2828	-0.998262	-7.07985	-0.206154	-12.149	-0.35376	-16.5439	-0.481733	-27.4277	-0.798652
	223.5	-24.5379	-0.714505	-10.1646	-0.295977	-34.305	-0.998908	-7.08766	-0.206382	-12.184	-0.354779	-16.5784	-0.482737	-27.443	-0.799097
	223.4	-24.6001	-0.716317	-10.1871	-0.296632	-34.3198	-0.999339	-7.09466	-0.206585	-12.223	-0.355915	-16.6134	-0.483756	-27.453	-0.799389
	223.3	-24.6627	-0.718139	-10.2094	-0.297282	-34.3322	-0.9997	-7.0977	-0.206674	-12.2545	-0.356832	-16.6528	-0.484904	-27.4663	-0.799776
	223.2	-24.7229	-0.719892	-10.2375	-0.2981	-34.3382	-0.999875	-7.10178	-0.206793	-12.2775	-0.357502	-16.692	-0.486045	-27.4846	-0.800309
	223.1	-24.7836	-0.72166	-10.2574	-0.298679	-34.3406	-0.999945	-7.11516	-0.207182	-12.2972	-0.358075	-16.7271	-0.487067	-27.508	-0.80099
	223	-24.8359	-0.723183	-10.2809	-0.299364	-34.3425	-1	-7.11838	-0.207276	-12.314	-0.358564	-16.7583	-0.487976	-27.5274	-0.801555
	222.9	-24.891	-0.724787	-10.3049	-0.300063	-34.3403	-0.999936	-7.1174	-0.207248	-12.3329	-0.359115	-16.7848	-0.488747	-27.5411	-0.801954
	222.8	-24.9521	-0.726566	-10.3352	-0.300945	-34.3419	-0.999983	-7.11295	-0.207118	-12.3494	-0.359595	-16.8151	-0.489629	-27.5568	-0.802411
	222.7	-25.0173	-0.728465	-10.3596	-0.301655	-34.3339	-0.99975	-7.11501	-0.207178	-12.3622	-0.359968	-16.8515	-0.490689	-27.5757	-0.802961
	222.6	-25.0718	-0.730052	-10.3823	-0.302316	-34.321	-0.999374	-7.12344	-0.207423	-12.3735	-0.360297	-16.8862	-0.4917	-27.5918	-0.80343
	222.5	-25.123	-0.731543	-10.3986	-0.302791	-34.3077	-0.998987	-7.12771	-0.207548	-12.3845	-0.360617	-16.9156	-0.492556	-27.6008	-0.803692
	222.4	-25.1674	-0.732835	-10.4179	-0.303353	-34.2869	-0.998381	-7.12242	-0.207394	-12.3864	-0.360673	-16.9444	-0.493394	-27.605	-0.803815
	222.3	-25.2064	-0.733971	-10.4471	-0.304203	-34.262	-0.997656	-7.13276	-0.207695	-12.392	-0.360836	-16.9675	-0.494067	-27.6107	-0.80398
	222.2	-25.2459	-0.735121	-10.4754	-0.305027	-34.2312	-0.996759	-7.14958	-0.208185	-12.3971	-0.360984	-16.9932	-0.494815	-27.6163	-0.804144
	222.1	-25.2872	-0.736324	-10.4991	-0.305717	-34.1961	-0.995737	-7.16402	-0.208605	-12.3994	-0.361051	-17.009	-0.495276	-27.6218	-0.804304
	222	-25.3327	-0.737649	-10.5282	-0.306565	-34.1498	-0.994389	-7.17825	-0.209019	-12.4005	-0.361083	-17.0225	-0.495669	-27.6274	-0.804467
	221.9	-25.368	-0.738677	-10.5582	-0.307438	-34.0852	-0.992508	-7.19573	-0.209528	-12.4069	-0.36127	-17.0398	-0.496172	-27.6413	-0.804872
	221.8	-25.4006	-0.739626	-10.5913	-0.308402	-34.0104	-0.99033	-7.21265	-0.210021	-12.4128	-0.361441	-17.0599	-0.496758	-27.6537	-0.805233
	221.7	-25.4269	-0.740392	-10.6255	-0.309398	-33.9331	-0.988079	-7.2238	-0.210346	-12.4212	-0.361686	-17.0754	-0.497209	-27.6589	-0.805384
	221.6	-25.4501	-0.741067	-10.6503	-0.31012	-33.8542	-0.985781	-7.23095	-0.210554	-12.4279	-0.361881	-17.089	-0.497605	-27.6635	-0.805518
	221.5	-25.479	-0.741909	-10.6719	-0.310749	-33.7832	-0.983714	-7.2429	-0.210902	-12.4378	-0.362169	-17.098	-0.497867	-27.676	-0.805882
	221.4	-25.5135	-0.742913	-10.6906	-0.311294	-33.7224	-0.981944	-7.25143	-0.21115	-12.4474	-0.362449	-17.1106	-0.498234	-27.6816	-0.806045
	221.3	-25.5398	-0.743679	-10.712	-0.311917	-33.6547	-0.979972	-7.25256	-0.211183	-12.4497	-0.362516	-17.1278	-0.498735	-27.6712	-0.805742
	221.2	-25.5676	-0.744489	-10.7248	-0.312289	-33.5901	-0.978091	-7.24796	-0.211049	-12.4454	-0.362391	-17.1493	-0.499361	-27.6614	-0.805457
	221.1	-25.5929	-0.745225	-10.7375	-0.312659	-33.5254	-0.976207	-7.24358	-0.210922	-12.4441	-0.362353	-17.1736	-0.500068	-27.6542	-0.805247
	221	-25.6196	-0.746003	-10.7517	-0.313073	-33.4582	-0.974251	-7.24211	-0.210879	-12.4363	-0.362126	-17.1916	-0.500593	-27.6401	-0.804837
	220.9	-25.6395	-0.746582	-10.7672	-0.313524	-33.3849	-0.972116	-7.23781	-0.210754	-12.4325	-0.362015	-17.2054	-0.500994	-27.6197	-0.804243
	220.8	-25.6582	-0.747127	-10.7854	-0.314054	-33.3039	-0.969758	-7.23439	-0.210654	-12.4385	-0.36219	-17.2124	-0.501198	-27.5893	-0.803357
	220.7	-25.672	-0.747529	-10.8056	-0.314642	-33.2219	-0.96737	-7.22432	-0.210361	-12.4482	-0.362472	-17.2225	-0.501492	-27.5464	-0.802108
	220.6	-25.6837	-0.747869	-10.8171	-0.314977	-33.1464	-0.965171	-7.22202	-0.210294	-12.4562	-0.362705	-17.2377	-0.501935	-27.5099	-0.801045
	220.5	-25.7027	-0.748423	-10.8235	-0.315163	-33.0784	-0.963191	-7.22822	-0.210474	-12.4607	-0.362836	-17.2505	-0.502308	-27.472	-0.799942
	220.4	-25.7297	-0.749209	-10.8259	-0.315233	-33.0013	-0.960946	-7.24034	-0.210827	-12.463	-0.362903	-17.2679	-0.502814	-27.4421	-0.799071
	220.3	-25.7529	-0.749884	-10.8308	-0.315376	-32.9206	-0.958596	-7.25149	-0.211152	-12.473	-0.363194	-17.2881	-0.503402	-27.4199	-0.798425
	220.2	-25.7723	-0.750449	-10.8355	-0.315513	-32.8465	-0.956439	-7.25664	-0.211302	-12.4909	-0.363716	-17.3086	-0.503999	-27.3963	-0.797737
	220.1	-25.7962	-0.751145	-10.8367	-0.315548	-32.7834	-0.954601	-7.26372	-0.211508	-12.5071	-0.364187	-17.3241	-0.504451	-27.3772	-0.797181
	220	-25.8157	-0.751713	-10.8279	-0.315292	-32.7209	-0.952782	-7.27463	-0.211826	-12.5151	-0.36442	-17.3374	-0.504838	-27.3538	-0.7965
	219.9	-25.8316	-0.752176	-10.8115	-0.314814	-32.6561	-0.950895	-7.28157	-0.212028	-12.5239	-0.364676	-17.3544	-0.505333	-27.3289	-0.795775
	219.8	-25.8343	-0.752254	-10.7891	-0.314162	-32.5815	-0.948722	-7.29201	-0.212332	-12.5373	-0.365067	-17.3648	-0.505636	-27.3005	-0.794948
	219.7	-25.8402	-0.752426	-10.7727	-0.313684	-32.5016	-0.946396	-7.30572	-0.212731	-12.5447	-0.365282	-17.3671	-0.505703	-27.2668	-0.793967
	219.6	-25.8425	-0.752493	-10.7582	-0.313262	-32.4283	-0.944261	-7.33506	-0.213585	-12.5461	-0.365323	-17.3723	-0.505854	-27.2334	-0.792994
	219.5	-25.8395	-0.752406	-10.7458	-0.312901	-32.3438	-0.941801	-7.36224	-0.214377	-12.5522	-0.3655	-17.3676	-0.505717	-27.2049	-0.792164
	219.4	-25.8311	-0.752161	-10.7346	-0.312575	-32.2464	-0.938965	-7.38881	-0.215151	-12.5607	-0.365748	-17.3648	-0.505636	-27.1684	-0.791101
	219.3	-25.8278	-0.752065	-10.7206	-0.312167	-32.142	-0.935925	-7.40787	-0.215706	-12.5607	-0.365748	-17.3645	-0.505627	-27.1339	-0.790097
	219.2	-25.8338	-0.75224	-10.7055	-0.311727	-32.0459	-0.933127	-7.4195	-0.216044	-12.5618	-0.36578	-17.3643	-0.505621	-27.1022	-0.789174
	219.1	-25.8479	-0.752651	-10.6954	-0.311433	-31.9606	-0.930643	-7.42473	-0.216197	-12.5587	-0.36569	-17.3655	-0.505656	-27.076	-0.788411
	219	-25.8621	-0.753064	-10.6834	-0.311084	-31.8812	-0.928331	-7.42347	-0.21616	-12.558	-0.365669	-17.3643	-0.505621	-27.0502	-0.78766
	218.9	-25.8814	-0.753626	-10.6786	-0.310944	-31.8072	-0.926176	-7.41305	-0.215856	-12.5509	-0.365463	-17.3588	-0.505461	-27.017	-0.786693
	218.8	-25.8874	-0.753801	-10.6769	-0.310895	-31.7332	-0.924021	-7.4079	-0.215706	-12.5365	-0.365043	-17.3515	-0.505249	-26.9808	-0.785639
	218.7	-25.8882	-0.753824	-10.6793	-0.310965	-31.6725	-0.922254	-7.41631	-0.215951	-12.5259	-0.364735	-17.3408	-0.504937	-26.9377	-0.784384
	218.6	-25.8917	-0.753926	-10.6873	-0.311197	-31.6129	-0.920518	-7.42003	-0.21606	-12.5156	-0.364435	-17.3304	-0.504634	-26.8941	-0.783114
	218.5	-25.9056	-0.754331	-10.6799	-0.310982	-31.5594	-0.91896	-7.42003	-0.21606	-12.511	-0.364301	-17.3184	-0.504285	-26.8475	-0.781757
	218.4	-25.9243	-0.754875	-10.6707	-0.310714	-31.5043	-0.917356	-7.42072	-0.21608	-12.5032	-0.364074	-17.3063	-0.503932	-26.7981	-0.780319
	218.3	-25.9395	-0.755318	-10.6569	-0.310312	-31.451	-0.915804	-7.42303	-0.216147	-12.4899	-0.363686	-17.2983	-0.503699	-26.7534	-0.779017
	218.2	-25.9403	-0.755341	-10.6446	-0.309954	-31.3918	-0.91408	-7.42394	-0.216174	-12.4808	-0.363421	-17.2873	-0.503379	-26.712	-0.777812
	218.1	-25.9307	-0.755062	-10.6244	-0.309366	-31.3207	-0.91201	-7.41959	-0.216047	-12.4672	-0.363025	-17.268	-0.502817	-26.6797	-0.776871
	218	-25.9208	-0.754773	-10.603	-0.308743	-31.2577	-0.910175	-7.41682	-0.215966	-12.4503	-0.362533	-17.2538	-0.502404	-26.6575	-0.776225
	217.9	-25.9131	-0.754549	-10.5781	-0.308018	-31.1956	-0.908367	-7.41806	-0.216002	-12.4523	-0.362592	-17.2438	-0.502113	-26.6447	-0.775852
	217.8	-25.905	-0.754313	-10.5588	-0.307456	-31.1263	-0.906349	-7.41677	-0.215965	-12.4515	-0.362568	-17.2371	-0.501917	-26.6486	-0.775966
	217.7	-25.893	-0.753964	-10.5553	-0.307354	-31.0467	-0.904031	-7.41254	-0.215842	-12.4473	-0.362446	-17.2338	-0.501821	-26.6471	-0.775922
	217.6	-25.8763	-0.753477	-10.5589	-0.307459	-30.965	-0.901652	-7.41462	-0.215902	-12.4397	-0.362225	-17.2296	-0.501699	-26.6328	-0.775506
	217.5	-25.8715	-0.753338	-10.5572	-0.307409	-30.8811	-0.899209	-7.41803	-0.216001	-12.4295	-0.361928	-17.2184	-0.501373	-26.6118	-0.774894
	217.4	-25.8768	-0.753492	-10.5585	-0.307447	-30.7967	-0.896752	-7.42944	-0.216334	-12.4212	-0.361686	-17.2102	-0.501134	-26.5859	-0.77414
	217.3	-25.8907	-0.753897	-10.5629	-0.307575	-30.7113	-0.894265	-7.43928	-0.21662	-12.4062	-0.361249	-17.2016	-0.500884	-26.5548	-0.773234
	217.2	-25.9028	-0.754249	-10.5772	-0.307992	-30.6196	-0.891595	-7.44361	-0.216746	-12.3944	-0.360906	-17.1924	-0.500616	-26.5285	-0.772469
	217.1	-25.9174	-0.754674	-10.587	-0.308277	-30.5462	-0.889458	-7.44771	-0.216866	-12.3826	-0.360562	-17.1869	-0.500456	-26.5197	-0.772212
	217	-25.9254	-0.754907	-10.5986	-0.308615	-30.4922	-0.887885	-7.45728	-0.217144	-12.371	-0.360224	-17.1741	-0.500083	-26.505	-0.771784
	216.9	-25.9259	-0.754922	-10.6163	-0.30913	-30.4397	-0.886357	-7.47141	-0.217556	-12.3558	-0.359782	-17.156	-0.499556	-26.483	-0.771144
	216.8	-25.9265	-0.754939	-10.6311	-0.309561	-30.3866	-0.88481	-7.4963	-0.218281	-12.3335	-0.359132	-17.1421	-0.499151	-26.4708	-0.770788
	216.7	-25.9202	-0.754756	-10.6479	-0.31005	-30.3399	-0.883451	-7.52347	-0.219072	-12.3228	-0.358821	-17.1284	-0.498752	-26.4561	-0.77036
	216.6	-25.9119	-0.754514	-10.6572	-0.310321	-30.308	-0.882522	-7.54616	-0.219732	-12.3223	-0.358806	-17.109	-0.498187	-26.4306	-0.769618
	216.5	-25.9074	-0.754383	-10.663	-0.31049	-30.2726	-0.881491	-7.55784	-0.220073	-12.3301	-0.359033	-17.0985	-0.497882	-26.398	-0.768669
	216.4	-25.9015	-0.754211	-10.6697	-0.310685	-30.236	-0.880425	-7.5704	-0.220438	-12.3315	-0.359074	-17.0881	-0.497579	-26.3664	-0.767748
	216.3	-25.9106	-0.754476	-10.6701	-0.310697	-30.2013	-0.879415	-7.58622	-0.220899	-12.338	-0.359263	-17.0817	-0.497392	-26.3373	-0.766901
	216.2	-25.9245	-0.754881	-10.6684	-0.310647	-30.1637	-0.87832	-7.60492	-0.221443	-12.344	-0.359438	-17.0745	-0.497183	-26.3076	-0.766036
	216.1	-25.9274	-0.754965	-10.6679	-0.310633	-30.1132	-0.876849	-7.61961	-0.221871	-12.3461	-0.359499	-17.0675	-0.496979	-26.2706	-0.764959
	216	-25.924	-0.754866	-10.6639	-0.310516	-30.0701	-0.875594	-7.62301	-0.22197	-12.3477	-0.359546	-17.0613	-0.496798	-26.2355	-0.763937
	215.9	-25.9296	-0.755029	-10.6645	-0.310534	-30.0285	-0.874383	-7.62351	-0.221985	-12.3474	-0.359537	-17.0639	-0.496874	-26.203	-0.76299
	215.8	-25.9369	-0.755242	-10.6742	-0.310816	-29.9872	-0.87318	-7.62638	-0.222068	-12.35	-0.359613	-17.0694	-0.497034	-26.1755	-0.76219
	215.7	-25.9451	-0.755481	-10.6861	-0.311163	-29.9553	-0.872252	-7.64179	-0.222517	-12.365	-0.36005	-17.0892	-0.497611	-26.1504	-0.761459
	215.6	-25.9558	-0.755792	-10.6912	-0.311311	-29.9264	-0.87141	-7.64474	-0.222603	-12.3879	-0.360716	-17.1122	-0.498281	-26.1385	-0.761112
	215.5	-25.9635	-0.756017	-10.6991	-0.311541	-29.8839	-0.870173	-7.64439	-0.222593	-12.4058	-0.361238	-17.1413	-0.499128	-26.1268	-0.760772
	215.4	-25.9799	-0.756494	-10.703	-0.311655	-29.856	-0.86936	-7.63806	-0.222408	-12.416	-0.361535	-17.1815	-0.500298	-26.1129	-0.760367
	215.3	-26.0006	-0.757097	-10.7073	-0.31178	-29.8264	-0.868498	-7.63629	-0.222357	-12.4213	-0.361689	-17.2242	-0.501542	-26.0972	-0.75991
	215.2	-26.0288	-0.757918	-10.7092	-0.311835	-29.8024	-0.867799	-7.64154	-0.22251	-12.4258	-0.36182	-17.2514	-0.502334	-26.0778	-0.759345
	215.1	-26.0527	-0.758614	-10.7071	-0.311774	-29.7946	-0.867572	-7.65589	-0.222928	-12.4358	-0.362111	-17.264	-0.502701	-26.066	-0.759001
	215	-26.0777	-0.759342	-10.7089	-0.311826	-29.7915	-0.867482	-7.67474	-0.223476	-12.4483	-0.362475	-17.2794	-0.503149	-26.0585	-0.758783
	214.9	-26.091	-0.759729	-10.7217	-0.312199	-29.791	-0.867467	-7.69033	-0.22393	-12.4603	-0.362824	-17.3022	-0.503813	-26.0528	-0.758617
	214.8	-26.0974	-0.759916	-10.734	-0.312557	-29.7661	-0.866742	-7.6978	-0.224148	-12.4719	-0.363162	-17.3262	-0.504512	-26.0538	-0.758646
	214.7	-26.1013	-0.760029	-10.7496	-0.313012	-29.734	-0.865808	-7.70678	-0.224409	-12.4868	-0.363596	-17.3402	-0.50492	-26.0697	-0.759109
	214.6	-26.1219	-0.760629	-10.763	-0.313402	-29.7041	-0.864937	-7.72368	-0.224902	-12.5097	-0.364263	-17.3459	-0.505086	-26.087	-0.759613
	214.5	-26.1508	-0.76147	-10.7833	-0.313993	-29.668	-0.863886	-7.73612	-0.225264	-12.5314	-0.364895	-17.355	-0.505351	-26.0973	-0.759913
	214.4	-26.1824	-0.762391	-10.7953	-0.314342	-29.6415	-0.863114	-7.74368	-0.225484	-12.5618	-0.36578	-17.3645	-0.505627	-26.1062	-0.760172
	214.3	-26.1994	-0.762886	-10.7965	-0.314377	-29.6236	-0.862593	-7.7451	-0.225525	-12.5931	-0.366691	-17.3834	-0.506177	-26.1198	-0.760568
	214.2	-26.2189	-0.763453	-10.7894	-0.31417	-29.6188	-0.862453	-7.73635	-0.22527	-12.6248	-0.367614	-17.4093	-0.506932	-26.145	-0.761302
	214.1	-26.2392	-0.764045	-10.7838	-0.314007	-29.6094	-0.86218	-7.73952	-0.225363	-12.6568	-0.368546	-17.4354	-0.507692	-26.1953	-0.762766
	214	-26.2647	-0.764787	-10.7782	-0.313844	-29.5962	-0.861795	-7.74592	-0.225549	-12.6844	-0.36935	-17.4511	-0.508149	-26.2455	-0.764228
	213.9	-26.2986	-0.765774	-10.7743	-0.313731	-29.5789	-0.861291	-7.74134	-0.225416	-12.7125	-0.370168	-17.4614	-0.508449	-26.299	-0.765786
	213.8	-26.327	-0.766601	-10.7796	-0.313885	-29.5699	-0.861029	-7.7376	-0.225307	-12.7384	-0.370922	-17.4826	-0.509066	-26.3549	-0.767414
	213.7	-26.3537	-0.767379	-10.7929	-0.314272	-29.5608	-0.860764	-7.73115	-0.225119	-12.7619	-0.371607	-17.4895	-0.509267	-26.4044	-0.768855
	213.6	-26.388	-0.768377	-10.8037	-0.314587	-29.5569	-0.860651	-7.73661	-0.225278	-12.7857	-0.3723	-17.5002	-0.509579	-26.4427	-0.76997
	213.5	-26.4182	-0.769257	-10.8156	-0.314933	-29.5611	-0.860773	-7.74728	-0.225589	-12.7947	-0.372562	-17.5141	-0.509983	-26.4776	-0.770986
	213.4	-26.4375	-0.769819	-10.8339	-0.315466	-29.5567	-0.860645	-7.76057	-0.225976	-12.8063	-0.372899	-17.5313	-0.510484	-26.5039	-0.771752
	213.3	-26.4675	-0.770692	-10.8594	-0.316209	-29.5413	-0.860197	-7.78334	-0.226639	-12.8274	-0.373514	-17.5484	-0.510982	-26.5266	-0.772413
	213.2	-26.5079	-0.771869	-10.8949	-0.317242	-29.5221	-0.859637	-7.80125	-0.22716	-12.8409	-0.373907	-17.5628	-0.511401	-26.5533	-0.773191
	213.1	-26.5467	-0.772998	-10.9193	-0.317953	-29.5111	-0.859317	-7.82474	-0.227844	-12.8508	-0.374195	-17.588	-0.512135	-26.583	-0.774055
	213	-26.5916	-0.774306	-10.9402	-0.318562	-29.5029	-0.859078	-7.84538	-0.228445	-12.8753	-0.374909	-17.6213	-0.513105	-26.6307	-0.775444
	212.9	-26.6351	-0.775573	-10.9619	-0.319193	-29.5174	-0.859501	-7.85805	-0.228814	-12.8994	-0.37561	-17.655	-0.514086	-26.6791	-0.776854
	212.8	-26.6927	-0.77725	-10.9852	-0.319872	-29.5424	-0.860229	-7.87662	-0.229355	-12.92	-0.37621	-17.691	-0.515134	-26.7358	-0.778505
	212.7	-26.7572	-0.779128	-11.0225	-0.320958	-29.5663	-0.860925	-7.89893	-0.230005	-12.9573	-0.377296	-17.7288	-0.516235	-26.7949	-0.780226
	212.6	-26.8127	-0.780744	-11.0663	-0.322233	-29.5795	-0.861309	-7.93202	-0.230968	-13.0106	-0.378848	-17.7829	-0.51781	-26.8403	-0.781548
	212.5	-26.8533	-0.781926	-11.1071	-0.323421	-29.5878	-0.861551	-7.96703	-0.231987	-13.0589	-0.380255	-17.8383	-0.519423	-26.8707	-0.782433
	212.4	-26.8909	-0.783021	-11.1478	-0.324607	-29.589	-0.861585	-7.98939	-0.232639	-13.108	-0.381685	-17.8956	-0.521092	-26.9007	-0.783306
	212.3	-26.9378	-0.784387	-11.1927	-0.325914	-29.6035	-0.862008	-8.02691	-0.233731	-13.1468	-0.382814	-17.9516	-0.522723	-26.9345	-0.784291
	212.2	-27.0007	-0.786218	-11.2297	-0.326991	-29.6238	-0.862599	-8.06438	-0.234822	-13.1803	-0.38379	-18.0018	-0.524184	-26.9682	-0.785272
	212.1	-27.0773	-0.788449	-11.2725	-0.328238	-29.6352	-0.862931	-8.09461	-0.235702	-13.2093	-0.384634	-18.0485	-0.525544	-27.0113	-0.786527
	212	-27.1392	-0.790251	-11.3131	-0.32942	-29.6303	-0.862788	-8.11948	-0.236427	-13.2405	-0.385543	-18.0913	-0.52679	-27.0627	-0.788024
	211.9	-27.203	-0.792109	-11.3421	-0.330264	-29.6395	-0.863056	-8.14278	-0.237105	-13.282	-0.386751	-18.1352	-0.528069	-27.1156	-0.789564
	211.8	-27.2644	-0.793897	-11.374	-0.331193	-29.6274	-0.862704	-8.16731	-0.237819	-13.315	-0.387712	-18.1866	-0.529565	-27.1708	-0.791171
	211.7	-27.3235	-0.795618	-11.4161	-0.332419	-29.6381	-0.863015	-8.19589	-0.238652	-13.3491	-0.388705	-18.2433	-0.531216	-27.2345	-0.793026
	211.6	-27.3822	-0.797327	-11.4612	-0.333732	-29.6662	-0.863833	-8.22087	-0.239379	-13.3856	-0.389768	-18.306	-0.533042	-27.2911	-0.794674
	211.5	-27.4529	-0.799386	-11.5011	-0.334894	-29.6945	-0.864657	-8.24867	-0.240188	-13.4172	-0.390688	-18.38	-0.535197	-27.3431	-0.796188
	211.4	-27.5325	-0.801703	-11.5401	-0.33603	-29.7509	-0.8663	-8.28043	-0.241113	-13.4424	-0.391422	-18.4605	-0.537541	-27.3868	-0.797461
	211.3	-27.6172	-0.80417	-11.5761	-0.337078	-29.8133	-0.868117	-8.31456	-0.242107	-13.4795	-0.392502	-18.5303	-0.539573	-27.4265	-0.798617
	211.2	-27.6944	-0.806418	-11.6192	-0.338333	-29.8716	-0.869814	-8.34321	-0.242941	-13.5224	-0.393751	-18.5924	-0.541382	-27.4599	-0.799589
	211.1	-27.7699	-0.808616	-11.6436	-0.339043	-29.9199	-0.871221	-8.37242	-0.243792	-13.5768	-0.395335	-18.6386	-0.542727	-27.4723	-0.79995
	211	-27.8409	-0.810684	-11.6591	-0.339495	-29.9516	-0.872144	-8.39723	-0.244514	-13.6219	-0.396648	-18.685	-0.544078	-27.4975	-0.800684
	210.9	-27.9033	-0.812501	-11.6743	-0.339937	-29.9859	-0.873143	-8.43478	-0.245608	-13.6641	-0.397877	-18.7278	-0.545324	-27.5354	-0.801788
	210.8	-27.953	-0.813948	-11.6902	-0.3404	-30.0117	-0.873894	-8.47476	-0.246772	-13.7013	-0.39896	-18.7772	-0.546763	-27.566	-0.802679
	210.7	-27.9999	-0.815313	-11.7004	-0.340697	-30.0468	-0.874916	-8.52231	-0.248156	-13.7347	-0.399933	-18.819	-0.54798	-27.5911	-0.80341
	210.6	-28.0389	-0.816449	-11.7185	-0.341224	-30.0885	-0.87613	-8.57673	-0.249741	-13.7731	-0.401051	-18.8621	-0.549235	-27.6055	-0.803829
	210.5	-28.0843	-0.817771	-11.7316	-0.341606	-30.1274	-0.877263	-8.64428	-0.251708	-13.8151	-0.402274	-18.9131	-0.55072	-27.6229	-0.804336
	210.4	-28.1385	-0.819349	-11.7454	-0.342008	-30.1383	-0.87758	-8.70499	-0.253476	-13.8567	-0.403485	-18.9697	-0.552368	-27.6315	-0.804586
	210.3	-28.1989	-0.821108	-11.7647	-0.34257	-30.1393	-0.877609	-8.7453	-0.254649	-13.8959	-0.404627	-19.039	-0.554386	-27.6418	-0.804886
	210.2	-28.2777	-0.823402	-11.7816	-0.343062	-30.1053	-0.876619	-8.77903	-0.255632	-13.9393	-0.405891	-19.1036	-0.556267	-27.6474	-0.805049
	210.1	-28.3688	-0.826055	-11.8026	-0.343673	-30.0512	-0.875044	-8.80487	-0.256384	-13.988	-0.407309	-19.1732	-0.558294	-27.6599	-0.805413
	210	-28.4611	-0.828743	-11.8199	-0.344177	-29.9842	-0.873093	-8.83337	-0.257214	-14.0194	-0.408223	-19.2358	-0.560116	-27.6646	-0.80555
	209.9	-28.5473	-0.831253	-11.8394	-0.344745	-29.9191	-0.871197	-8.8583	-0.25794	-14.0481	-0.409059	-19.2923	-0.561762	-27.6664	-0.805602
	209.8	-28.6311	-0.833693	-11.8482	-0.345001	-29.8543	-0.869311	-8.8758	-0.258449	-14.0739	-0.40981	-19.3345	-0.56299	-27.6645	-0.805547
	209.7	-28.7126	-0.836066	-11.8499	-0.345051	-29.7999	-0.867727	-8.88474	-0.25871	-14.1122	-0.410925	-19.3755	-0.564184	-27.6614	-0.805457
	209.6	-28.777	-0.837941	-11.8546	-0.345187	-29.7323	-0.865758	-8.90698	-0.259357	-14.1556	-0.412189	-19.4212	-0.565515	-27.6669	-0.805617
	209.5	-28.8203	-0.839202	-11.8563	-0.345237	-29.6565	-0.863551	-8.93335	-0.260125	-14.2052	-0.413633	-19.4695	-0.566921	-27.6787	-0.805961
	209.4	-28.8807	-0.840961	-11.8598	-0.345339	-29.5866	-0.861516	-8.96772	-0.261126	-14.2549	-0.41508	-19.5077	-0.568034	-27.6937	-0.806397
	209.3	-28.9266	-0.842297	-11.8637	-0.345452	-29.5158	-0.859454	-9.00665	-0.26226	-14.2996	-0.416382	-19.5423	-0.569041	-27.7059	-0.806753
	209.2	-28.968	-0.843503	-11.8646	-0.345479	-29.433	-0.857043	-9.04173	-0.263281	-14.3418	-0.417611	-19.5741	-0.569967	-27.7134	-0.806971
	209.1	-29.0088	-0.844691	-11.8657	-0.345511	-29.3278	-0.85398	-9.05302	-0.26361	-14.367	-0.418345	-19.5846	-0.570273	-27.7211	-0.807195
	209	-29.0486	-0.84585	-11.8595	-0.34533	-29.2042	-0.850381	-9.05865	-0.263774	-14.3738	-0.418543	-19.5839	-0.570253	-27.7265	-0.807352
	208.9	-29.0812	-0.846799	-11.8491	-0.345027	-29.0785	-0.846721	-9.06729	-0.264025	-14.3581	-0.418085	-19.593	-0.570518	-27.7216	-0.80721
	208.8	-29.1078	-0.847574	-11.8309	-0.344497	-28.9356	-0.84256	-9.07503	-0.264251	-14.3373	-0.41748	-19.5892	-0.570407	-27.7147	-0.807009
	208.7	-29.1249	-0.848072	-11.8167	-0.344084	-28.7879	-0.838259	-9.10618	-0.265158	-14.3147	-0.416822	-19.5738	-0.569959	-27.6926	-0.806365
	208.6	-29.1438	-0.848622	-11.7945	-0.343437	-28.6526	-0.834319	-9.13711	-0.266058	-14.2947	-0.416239	-19.5621	-0.569618	-27.6549	-0.805268
	208.5	-29.1734	-0.849484	-11.7771	-0.342931	-28.5277	-0.830682	-9.15471	-0.266571	-14.2646	-0.415363	-19.5593	-0.569536	-27.601	-0.803698
	208.4	-29.2119	-0.850605	-11.7549	-0.342284	-28.3989	-0.826932	-9.17173	-0.267066	-14.232	-0.414414	-19.5547	-0.569402	-27.5311	-0.801663
	208.3	-29.2405	-0.851438	-11.7154	-0.341134	-28.2401	-0.822308	-9.18488	-0.267449	-14.2102	-0.413779	-19.5434	-0.569073	-27.4703	-0.799892
	208.2	-29.2648	-0.852145	-11.6725	-0.339885	-28.0773	-0.817567	-9.20946	-0.268165	-14.1889	-0.413159	-19.5352	-0.568835	-27.3908	-0.797577
	208.1	-29.2863	-0.852771	-11.6336	-0.338752	-27.9173	-0.812908	-9.23449	-0.268894	-14.1694	-0.412591	-19.5137	-0.568208	-27.2896	-0.794631
	208	-29.2981	-0.853115	-11.5946	-0.337617	-27.7387	-0.807708	-9.24445	-0.269184	-14.136	-0.411618	-19.4946	-0.567652	-27.1785	-0.791396
	207.9	-29.2972	-0.853089	-11.5536	-0.336423	-27.5371	-0.801837	-9.25327	-0.269441	-14.1031	-0.41066	-19.4641	-0.566764	-27.0514	-0.787695
	207.8	-29.289	-0.85285	-11.5133	-0.335249	-27.3329	-0.795891	-9.26762	-0.269859	-14.0795	-0.409973	-19.403	-0.564985	-26.9254	-0.784026
	207.7	-29.2798	-0.852582	-11.4571	-0.333613	-27.0942	-0.788941	-9.29585	-0.270681	-14.0585	-0.409362	-19.3407	-0.563171	-26.8	-0.780374
	207.6	-29.265	-0.852151	-11.4011	-0.331982	-26.8216	-0.781003	-9.32982	-0.27167	-14.0286	-0.408491	-19.2656	-0.560984	-26.6602	-0.776303
	207.5	-29.2559	-0.851886	-11.3398	-0.330197	-26.5502	-0.7731	-9.35182	-0.27231	-13.984	-0.407192	-19.1872	-0.558701	-26.4942	-0.77147
	207.4	-29.2521	-0.851775	-11.2841	-0.328575	-26.2736	-0.765046	-9.37938	-0.273113	-13.9293	-0.405599	-19.097	-0.556075	-26.3161	-0.766284
	207.3	-29.2246	-0.850975	-11.2323	-0.327067	-25.9799	-0.756494	-9.41363	-0.27411	-13.8707	-0.403893	-19.0118	-0.553594	-26.1461	-0.761334
	207.2	-29.1792	-0.849653	-11.1815	-0.325588	-25.6626	-0.747255	-9.44178	-0.27493	-13.8046	-0.401968	-18.9182	-0.550868	-25.9627	-0.755993
	207.1	-29.1326	-0.848296	-11.1281	-0.324033	-25.3409	-0.737887	-9.47692	-0.275953	-13.7464	-0.400274	-18.8188	-0.547974	-25.7771	-0.750589
	207	-29.0755	-0.846633	-11.0647	-0.322187	-24.9913	-0.727708	-9.50485	-0.276766	-13.6915	-0.398675	-18.7374	-0.545604	-25.5743	-0.744684
	206.9	-28.9943	-0.844269	-11.017	-0.320798	-24.6305	-0.717202	-9.51916	-0.277183	-13.6355	-0.397044	-18.6531	-0.543149	-25.3663	-0.738627
	206.8	-28.9072	-0.841733	-10.9637	-0.319246	-24.2636	-0.706518	-9.53165	-0.277547	-13.5814	-0.395469	-18.5664	-0.540625	-25.1517	-0.732378
	206.7	-28.8169	-0.839103	-10.9122	-0.317746	-23.8814	-0.695389	-9.52714	-0.277415	-13.5089	-0.393358	-18.472	-0.537876	-24.9328	-0.726004
	206.6	-28.6888	-0.835373	-10.857	-0.316139	-23.5096	-0.684563	-9.48869	-0.276296	-13.4397	-0.391343	-18.3685	-0.534862	-24.7116	-0.719563
	206.5	-28.5574	-0.831547	-10.8001	-0.314482	-23.1617	-0.674433	-9.46086	-0.275485	-13.374	-0.38943	-18.2639	-0.531816	-24.475	-0.712674
	206.4	-28.4151	-0.827403	-10.7532	-0.313116	-22.7966	-0.663801	-9.43147	-0.27463	-13.3021	-0.387336	-18.1385	-0.528165	-24.2155	-0.705118
	206.3	-28.2671	-0.823094	-10.6958	-0.311445	-22.4038	-0.652364	-9.41079	-0.274028	-13.2226	-0.385021	-18.0091	-0.524397	-23.9294	-0.696787
	206.2	-28.106	-0.818403	-10.6216	-0.309284	-21.986	-0.640198	-9.41509	-0.274153	-13.1486	-0.382867	-17.8695	-0.520332	-23.6369	-0.68827
	206.1	-27.9286	-0.813237	-10.5388	-0.306873	-21.5392	-0.627188	-9.40745	-0.27393	-13.0579	-0.380226	-17.7159	-0.515859	-23.3386	-0.679584
	206	-27.7579	-0.808267	-10.4471	-0.304203	-21.0775	-0.613744	-9.38634	-0.273316	-12.9384	-0.376746	-17.5364	-0.510633	-23.0322	-0.670662
	205.9	-27.5849	-0.803229	-10.3501	-0.301379	-20.6072	-0.60005	-9.36008	-0.272551	-12.805	-0.372862	-17.3435	-0.505016	-22.7353	-0.662016
	205.8	-27.4193	-0.798407	-10.2552	-0.298615	-20.1316	-0.586201	-9.3499	-0.272254	-12.6699	-0.368928	-17.1482	-0.499329	-22.4359	-0.653298
	205.7	-27.2447	-0.793323	-10.1603	-0.295852	-19.6365	-0.571784	-9.34097	-0.271994	-12.5311	-0.364886	-16.945	-0.493412	-22.1182	-0.644047
	205.6	-27.0452	-0.787514	-10.0668	-0.29313	-19.0954	-0.556028	-9.30441	-0.27093	-12.4017	-0.361118	-16.739	-0.487414	-21.8066	-0.634974
	205.5	-26.8364	-0.781434	-9.96307	-0.290109	-18.5741	-0.540849	-9.24917	-0.269321	-12.2793	-0.357554	-16.5232	-0.48113	-21.481	-0.625493
	205.4	-26.6213	-0.775171	-9.84704	-0.28673	-18.0565	-0.525777	-9.19489	-0.267741	-12.1562	-0.35397	-16.3024	-0.4747	-21.1523	-0.615922
	205.3	-26.4048	-0.768867	-9.73423	-0.283446	-17.5331	-0.510537	-9.12831	-0.265802	-12.0216	-0.35005	-16.092	-0.468574	-20.8136	-0.60606
	205.2	-26.1744	-0.762158	-9.6356	-0.280574	-17.0039	-0.495127	-9.08251	-0.264469	-11.8772	-0.345846	-15.8766	-0.462302	-20.4581	-0.595708
	205.1	-25.913	-0.754546	-9.53892	-0.277758	-16.4585	-0.479246	-9.04309	-0.263321	-11.7454	-0.342008	-15.6616	-0.456041	-20.0837	-0.584806
	205	-25.6436	-0.746702	-9.41795	-0.274236	-15.8322	-0.461009	-9.00395	-0.262181	-11.5997	-0.337765	-15.4367	-0.449493	-19.689	-0.573313
	204.9	-25.3725	-0.738808	-9.28125	-0.270256	-15.1467	-0.441048	-8.9508	-0.260633	-11.4461	-0.333293	-15.192	-0.442367	-19.2901	-0.561698
	204.8	-25.092	-0.73064	-9.1454	-0.2663	-14.4183	-0.419838	-8.88581	-0.258741	-11.2919	-0.328803	-14.9322	-0.434802	-18.865	-0.549319
	204.7	-24.773	-0.721351	-9.01233	-0.262425	-13.6172	-0.396512	-8.81096	-0.256561	-11.1375	-0.324307	-14.6817	-0.427508	-18.4438	-0.537055
	204.6	-24.4447	-0.711792	-8.87237	-0.25835	-12.7814	-0.372174	-8.74876	-0.25475	-10.9628	-0.31922	-14.4307	-0.420199	-18.0149	-0.524566
	204.5	-24.1117	-0.702095	-8.71686	-0.253821	-11.961	-0.348286	-8.69951	-0.253316	-10.771	-0.313635	-14.1695	-0.412594	-17.57	-0.511611
	204.4	-23.7848	-0.692576	-8.56755	-0.249474	-11.1803	-0.325553	-8.65527	-0.252028	-10.5719	-0.307837	-13.8971	-0.404662	-17.1193	-0.498487
	204.3	-23.4591	-0.683092	-8.41274	-0.244966	-10.3983	-0.302782	-8.60446	-0.250548	-10.3633	-0.301763	-13.6258	-0.396762	-16.6475	-0.484749
	204.2	-23.1094	-0.67291	-8.25548	-0.240387	-9.58106	-0.278986	-8.52714	-0.248297	-10.1424	-0.295331	-13.3495	-0.388717	-16.1624	-0.470624
	204.1	-22.7561	-0.662622	-8.09185	-0.235622	-8.74205	-0.254555	-8.42592	-0.24535	-9.92343	-0.288955	-13.0641	-0.380406	-15.676	-0.456461
	204	-22.4062	-0.652434	-7.92427	-0.230742	-7.86784	-0.229099	-8.29967	-0.241673	-9.70834	-0.282692	-12.7767	-0.372038	-15.1935	-0.442411
	203.9	-22.0588	-0.642318	-7.76451	-0.22609	-6.9982	-0.203777	-8.15164	-0.237363	-9.47696	-0.275954	-12.4799	-0.363395	-14.7098	-0.428326
	203.8	-21.6944	-0.631707	-7.60073	-0.221321	-6.13065	-0.178515	-8.00416	-0.233069	-9.24424	-0.269178	-12.1736	-0.354476	-14.211	-0.413802
	203.7	-21.2995	-0.620208	-7.4141	-0.215887	-5.25234	-0.15294	-7.88622	-0.229634	-9.0094	-0.26234	-11.8567	-0.345249	-13.703	-0.39901
	203.6	-20.8925	-0.608357	-7.21565	-0.210108	-4.38941	-0.127813	-7.77955	-0.226528	-8.76736	-0.255292	-11.5256	-0.335607	-13.194	-0.384189
	203.5	-20.4494	-0.595455	-7.00325	-0.203924	-3.52141	-0.102538	-7.66841	-0.223292	-8.51527	-0.247951	-11.1788	-0.325509	-12.6564	-0.368535
	203.4	-19.9926	-0.582153	-6.78663	-0.197616	-2.62499	-0.0764356	-7.57694	-0.220629	-8.24712	-0.240143	-10.8177	-0.314995	-12.1042	-0.352455
	203.3	-19.5205	-0.568406	-6.56814	-0.191254	-1.70077	-0.0495238	-7.50607	-0.218565	-7.98344	-0.232465	-10.4455	-0.304157	-11.5505	-0.336333
	203.2	-19.0529	-0.554791	-6.34506	-0.184758	-0.769314	-0.0224012	-7.43382	-0.216461	-7.70895	-0.224473	-10.0617	-0.292981	-10.9847	-0.319857
	203.1	-18.5744	-0.540858	-6.13339	-0.178595	0.186501	0.00543062	-7.35671	-0.214216	-7.42281	-0.216141	-9.66914	-0.28155	-10.3916	-0.302587
	203	-18.0757	-0.526336	-5.92384	-0.172493	1.16694	0.0339795	-7.28356	-0.212086	-7.12669	-0.207518	-9.27148	-0.269971	-9.78172	-0.284828
	202.9	-17.5695	-0.511596	-5.69522	-0.165836	2.15516	0.0627549	-7.20539	-0.20981	-6.82308	-0.198677	-8.86751	-0.258208	-9.16563	-0.266889
	202.8	-17.0575	-0.496688	-5.46133	-0.159025	3.13631	0.0913245	-7.1248	-0.207463	-6.52713	-0.19006	-8.45778	-0.246277	-8.53349	-0.248482
	202.7	-16.5387	-0.481581	-5.23095	-0.152317	4.13321	0.120353	-7.04872	-0.205248	-6.22874	-0.181371	-8.04482	-0.234253	-7.8818	-0.229506
	202.6	-16.0065	-0.466084	-5.00114	-0.145625	5.17203	0.150601	-6.97856	-0.203205	-5.92864	-0.172633	-7.62162	-0.22193	-7.21116	-0.209978
	202.5	-15.4424	-0.449659	-4.76059	-0.138621	6.18906	0.180216	-6.91205	-0.201268	-5.63322	-0.164031	-7.18339	-0.209169	-6.53564	-0.190308
	202.4	-14.854	-0.432525	-4.51994	-0.131614	7.1934	0.209461	-6.83862	-0.19913	-5.3518	-0.155836	-6.74965	-0.196539	-5.84653	-0.170242
	202.3	-14.27	-0.41552	-4.28659	-0.124819	8.19464	0.238615	-6.75507	-0.196697	-5.06453	-0.147471	-6.31472	-0.183875	-5.15023	-0.149967
	202.2	-13.7138	-0.399324	-4.06168	-0.11827	9.21725	0.268392	-6.67078	-0.194243	-4.78314	-0.139278	-5.87518	-0.171076	-4.45538	-0.129734
	202.1	-13.155	-0.383053	-3.83868	-0.111776	10.3116	0.300258	-6.57442	-0.191437	-4.49544	-0.1309	-5.42165	-0.15787	-3.74202	-0.108962
	202	-12.5879	-0.36654	-3.6171	-0.105324	11.4709	0.334015	-6.4535	-0.187916	-4.19762	-0.122228	-4.96563	-0.144591	-3.03555	-0.0883905
	201.9	-11.9946	-0.349264	-3.38454	-0.0985525	12.6281	0.367711	-6.34166	-0.184659	-3.89506	-0.113418	-4.49545	-0.1309	-2.31682	-0.0674622
	201.8	-11.352	-0.330553	-3.11297	-0.0906448	13.7434	0.400186	-6.23336	-0.181506	-3.58913	-0.10451	-4.02719	-0.117265	-1.58302	-0.0460951
	201.7	-10.7041	-0.311687	-2.82955	-0.0823921	14.8464	0.432304	-6.12449	-0.178336	-3.27652	-0.0954071	-3.5555	-0.103531	-0.837997	-0.0244012
	201.6	-10.0387	-0.292311	-2.56325	-0.0746378	15.942	0.464206	-6.01702	-0.175206	-2.93316	-0.085409	-3.07509	-0.0895418	-0.0846576	-0.0024651
	201.5	-9.34998	-0.272257	-2.30393	-0.0670868	17.0286	0.495846	-5.90708	-0.172005	-2.56794	-0.0747744	-2.58223	-0.0751905	0.668891	0.0194771
	201.4	-8.64332	-0.25168	-2.03391	-0.0592243	18.1063	0.527227	-5.8038	-0.168998	-2.19562	-0.063933	-2.09914	-0.0611237	1.42479	0.0414877
	201.3	-7.93302	-0.230997	-1.77061	-0.0515574	19.1907	0.558803	-5.70625	-0.166157	-1.83026	-0.0532943	-1.60863	-0.0468408	2.1593	0.0628754
	201.2	-7.18843	-0.209316	-1.49553	-0.0435475	20.3146	0.591529	-5.59969	-0.163054	-1.4665	-0.0427022	-1.12431	-0.0327382	2.89053	0.0841677
	201.1	-6.42111	-0.186973	-1.23675	-0.0360122	21.4194	0.623699	-5.49752	-0.160079	-1.0817	-0.0314974	-0.659769	-0.0192114	3.64449	0.106122
	201	-5.62914	-0.163912	-0.991397	-0.0288679	22.435	0.653272	-5.35359	-0.155888	-0.692784	-0.0201728	-0.187266	-0.00545289	4.416	0.128587
	200.9	-4.85084	-0.141249	-0.739364	-0.0215291	23.4743	0.683535	-5.20701	-0.15162	-0.329075	-0.00958215	0.287044	0.00835827	5.19207	0.151185
	200.8	-4.03871	-0.117601	-0.489431	-0.0142515	24.5177	0.713917	-5.07677	-0.147828	0.025275	0.000735969	0.782324	0.0227801	5.9858	0.174297
	200.7	-3.19743	-0.0931042	-0.223928	-0.00652043	25.5494	0.743959	-4.93007	-0.143556	0.374473	0.0109041	1.27901	0.0372428	6.78816	0.197661
	200.6	-2.37401	-0.0691275	0.0376236	0.00109554	26.5709	0.773703	-4.78361	-0.139291	0.71516	0.0208243	1.76996	0.0515385	7.58259	0.220793
	200.5	-1.51196	-0.0440259	0.305479	0.00889507	27.6751	0.805856	-4.61086	-0.134261	1.06159	0.0309118	2.24335	0.0653229	8.38869	0.244266
	200.4	-0.639384	-0.0186179	0.564589	0.01644	28.7153	0.836145	-4.43803	-0.129229	1.41539	0.0412139	2.75497	0.0802204	9.19844	0.267844
	200.3	0.246881	0.00718879	0.848834	0.0247167	29.7242	0.865522	-4.27887	-0.124594	1.78228	0.0518972	3.29744	0.0960163	9.99351	0.290995
	200.2	1.1272	0.0328223	1.14785	0.0334236	30.8146	0.897273	-4.12194	-0.120024	2.15165	0.0626527	3.84192	0.111871	10.8192	0.315038
	200.1	2.00066	0.0582561	1.45717	0.0424305	31.8347	0.926977	-3.97732	-0.115813	2.52229	0.0734451	4.40878	0.128377	11.6516	0.339276
	200	2.86056	0.083295	1.7736	0.0516445	32.7998	0.955079	-3.8787	-0.112942	2.8915	0.084196	4.9893	0.145281	12.4959	0.363861
	199.9	3.70535	0.107894	2.11152	0.0614842	33.802	0.984261	-3.81611	-0.111119	3.28697	0.0957114	5.55981	0.161893	13.3501	0.388734
	199.8	4.57951	0.133348	2.45764	0.0715626	34.8537	1.01489	-3.75306	-0.109283	3.68209	0.107217	6.1345	0.178627	14.1948	0.41333
	199.7	5.4407	0.158425	2.81377	0.0819326	35.9683	1.04734	-3.67023	-0.106871	4.07272	0.118591	6.72389	0.195789	15.0204	0.437371
	199.6	6.34981	0.184897	3.15364	0.0918291	37.0869	1.07991	-3.56426	-0.103786	4.43809	0.12923	7.32333	0.213244	15.8372	0.461155
	199.5	7.23607	0.210703	3.46933	0.101021	38.2113	1.11265	-3.43157	-0.099922	4.79499	0.139623	7.88054	0.229469	16.6563	0.485005
	199.4	8.11793	0.236381	3.78654	0.110258	39.4013	1.1473	-3.31026	-0.0963896	5.14535	0.149825	8.43166	0.245517	17.484	0.509107
	199.3	9.03721	0.263149	4.09854	0.119343	40.5633	1.18114	-3.18193	-0.0926528	5.47959	0.159557	8.98657	0.261675	18.3121	0.53322
	199.2	9.98475	0.29074	4.40215	0.128184	41.6621	1.21314	-3.05565	-0.0889758	5.81427	0.169302	9.55186	0.278135	19.1532	0.557711
	199.1	10.9053	0.317545	4.71222	0.137212	42.709	1.24362	-2.91274	-0.0848144	6.16467	0.179506	10.1165	0.294577	20.0018	0.582421
	199	11.8192	0.344157	5.04595	0.14693	43.7183	1.27301	-2.75789	-0.0803055	6.52333	0.189949	10.6751	0.310842	20.8399	0.606825
	198.9	12.7349	0.37082	5.39112	0.156981	44.8041	1.30463	-2.58202	-0.0751844	6.88257	0.20041	11.2129	0.326502	21.6809	0.631314
	198.8	13.6582	0.397705	5.74254	0.167214	45.9936	1.33926	-2.42115	-0.0705001	7.23753	0.210746	11.7511	0.342174	22.5377	0.656263
	198.7	14.5778	0.424483	6.09912	0.177597	47.0738	1.37072	-2.27954	-0.0663766	7.59877	0.221264	12.2858	0.357743	23.4034	0.68147
	198.6	15.5012	0.451371	6.46477	0.188244	48.0886	1.40026	-2.14641	-0.0625001	7.97189	0.232129	12.8674	0.374679	24.2606	0.706431
	198.5	16.4322	0.47848	6.83801	0.199112	49.0722	1.42891	-2.01287	-0.0586116	8.3676	0.243651	13.4557	0.391809	25.0636	0.729813
	198.4	17.3007	0.503769	7.19416	0.209483	50.104	1.45895	-1.8464	-0.0537643	8.7749	0.255511	14.055	0.40926	25.8503	0.75272
	198.3	18.19	0.529664	7.54445	0.219683	51.1377	1.48905	-1.68226	-0.0489848	9.19147	0.267641	14.6399	0.426291	26.6212	0.775168
	198.2	19.106	0.556337	7.88186	0.229507	52.1313	1.51798	-1.52756	-0.0444802	9.60307	0.279626	15.2149	0.443034	27.3845	0.797394
	198.1	20.0131	0.58275	8.21517	0.239213	53.0528	1.54481	-1.41	-0.041057	9.98596	0.290776	15.7739	0.459311	28.1428	0.819474
	198	20.8996	0.608564	8.53558	0.248543	53.831	1.56747	-1.28929	-0.0375421	10.372	0.302016	16.3535	0.476188	28.9038	0.841634
	197.9	21.7736	0.634013	8.84051	0.257422	54.3999	1.58404	-1.14533	-0.0333502	10.7487	0.312985	16.9369	0.493176	29.6256	0.862651
	197.8	22.6559	0.659704	9.14929	0.266413	54.9968	1.60142	-0.981106	-0.0285683	11.1096	0.323494	17.5203	0.510164	30.3495	0.88373
	197.7	23.4936	0.684097	9.48026	0.27605	55.5911	1.61873	-0.811188	-0.0236205	11.4836	0.334385	18.109	0.527306	31.0583	0.904369
	197.6	24.2981	0.707523	9.78561	0.284942	56.2169	1.63695	-0.626161	-0.0182328	11.8598	0.345339	18.698	0.544457	31.7566	0.924703
	197.5	25.0864	0.730477	10.0928	0.293887	56.7176	1.65153	-0.457392	-0.0133185	12.2286	0.356078	19.2919	0.56175	32.4745	0.945607
	197.4	25.8473	0.752633	10.3994	0.302814	57.298	1.66843	-0.287256	-0.00836445	12.5799	0.366307	19.8565	0.57819	33.2034	0.966831
	197.3	26.6074	0.774766	10.7053	0.311722	58.0939	1.6916	-0.133844	-0.00389733	12.912	0.375977	20.4131	0.594398	33.954	0.988687
	197.2	27.3557	0.796555	11.0353	0.321331	58.8464	1.71352	0.00659698	0.000192094	13.2393	0.385508	20.9747	0.610751	34.7041	1.01053
	197.1	28.1283	0.819052	11.3277	0.329845	59.5194	1.73311	0.154568	0.00450078	13.5534	0.394654	21.527	0.626833	35.4534	1.03235
	197	28.9037	0.841631	11.597	0.337687	60.2684	1.75492	0.305829	0.00890526	13.8639	0.403695	22.0584	0.642306	36.1825	1.05358
	196.9	29.6773	0.864157	11.8524	0.345123	61.0333	1.77719	0.475814	0.013855	14.1782	0.412847	22.5686	0.657162	36.9005	1.07448
	196.8	30.4691	0.887213	12.0848	0.351891	61.6657	1.79561	0.62312	0.0181443	14.4751	0.421492	23.0532	0.671273	37.589	1.09453
	196.7	31.2656	0.910405	12.3379	0.35926	62.1531	1.8098	0.763914	0.022244	14.7464	0.429392	23.5593	0.68601	38.242	1.11355
	196.6	32.0293	0.932643	12.6049	0.367035	62.6297	1.82368	0.881689	0.0256734	15.0243	0.437484	24.0377	0.69994	38.8826	1.1322
	196.5	32.817	0.95558	12.8852	0.375197	63.1355	1.83841	0.98618	0.028716	15.2916	0.445268	24.4567	0.712141	39.5236	1.15087
	196.4	33.5908	0.978112	13.1757	0.383656	63.4854	1.8486	1.12496	0.0327571	15.538	0.452442	24.8749	0.724318	40.1464	1.169
	196.3	34.3311	0.999668	13.4324	0.391131	63.7955	1.85763	1.22142	0.0355658	15.7813	0.459527	25.331	0.737599	40.7586	1.18683
	196.2	35.0297	1.02001	13.6812	0.398375	64.16	1.86824	1.31226	0.038211	16.0206	0.466495	25.7676	0.750312	41.3643	1.20446
	196.1	35.7361	1.04058	13.9591	0.406467	64.4628	1.87706	1.43051	0.0416542	16.2629	0.47355	26.1957	0.762778	41.9745	1.22223
	196	36.4464	1.06126	14.2588	0.415194	64.8134	1.88727	1.61092	0.0469075	16.5118	0.480798	26.5978	0.774486	42.5787	1.23983
	195.9	37.1988	1.08317	14.5405	0.423397	65.1431	1.89687	1.76907	0.0515126	16.7519	0.487789	26.9828	0.785697	43.1651	1.2569
	195.8	37.9727	1.10571	14.7972	0.430871	65.5758	1.90946	1.90867	0.0555775	16.9769	0.494341	27.3301	0.79581	43.7304	1.27336
	195.7	38.6848	1.12644	15.0372	0.43786	66.0033	1.92191	2.00894	0.0584972	17.2125	0.501201	27.7079	0.806811	44.2858	1.28953
	195.6	39.3775	1.14661	15.2613	0.444385	66.3744	1.93272	2.14558	0.0624759	17.4519	0.508172	28.1018	0.818281	44.8356	1.30554
	195.5	40.1063	1.16783	15.4702	0.450468	66.7737	1.94435	2.2714	0.0661396	17.6626	0.514307	28.4713	0.82904	45.3596	1.3208
	195.4	40.8443	1.18932	15.6754	0.456443	67.012	1.95128	2.37782	0.0692384	17.8391	0.519447	28.8291	0.839458	45.8926	1.33632
	195.3	41.5208	1.20902	15.8815	0.462444	66.9822	1.95042	2.47234	0.0719907	18.0075	0.52435	29.1366	0.848412	46.4158	1.35156
	195.2	42.121	1.2265	16.068	0.467875	66.8701	1.94715	2.58544	0.075284	18.1992	0.529932	29.4033	0.856178	46.9008	1.36568
	195.1	42.6998	1.24335	16.2218	0.472353	66.9029	1.94811	2.68149	0.0780808	18.4137	0.536178	29.6406	0.863088	47.36	1.37905
	195	43.2856	1.26041	16.3376	0.475725	66.8248	1.94583	2.78325	0.0810439	18.5851	0.541169	29.8635	0.869579	47.7908	1.39159
	194.9	43.8301	1.27626	16.4677	0.479514	66.4648	1.93535	2.88446	0.083991	18.7313	0.545426	30.0469	0.874919	48.2227	1.40417
	194.8	44.3375	1.29104	16.5998	0.48336	65.9519	1.92042	3.00131	0.0873935	18.8642	0.549296	30.2457	0.880708	48.6526	1.41669
	194.7	44.8669	1.30645	16.7519	0.487789	65.6053	1.91032	3.14192	0.0914878	18.999	0.553221	30.4779	0.887469	49.0934	1.42952
	194.6	45.3564	1.32071	16.9196	0.492672	65.1232	1.89629	3.28104	0.0955388	19.1373	0.557248	30.6944	0.893773	49.5473	1.44274
	194.5	45.8812	1.33599	17.0742	0.497174	64.6762	1.88327	3.43221	0.0999406	19.2928	0.561776	30.8981	0.899704	49.9524	1.45454
	194.4	46.3807	1.35053	17.2178	0.501355	64.2608	1.87117	3.571	0.103982	19.4397	0.566054	31.0967	0.905487	50.3154	1.46511
	194.3	46.852	1.36426	17.3431	0.505004	64.0304	1.86447	3.64586	0.106162	19.5689	0.569816	31.2971	0.911323	50.6043	1.47352
	194.2	47.2867	1.37691	17.4342	0.507657	63.7605	1.85661	3.69926	0.107717	19.6879	0.573281	31.5213	0.917851	50.8715	1.4813
	194.1	47.6742	1.3882	17.5364	0.510633	63.4531	1.84766	3.76033	0.109495	19.8094	0.576819	31.7283	0.923879	51.1319	1.48888
	194	48.0567	1.39934	17.6291	0.513332	63.1617	1.83917	3.88537	0.113136	19.8993	0.579437	31.9324	0.929822	51.4034	1.49679
	193.9	48.4153	1.40978	17.7196	0.515967	62.8952	1.83141	4.00888	0.116732	19.9919	0.582133	32.1549	0.936301	51.6767	1.50474
	193.8	48.7264	1.41884	17.8354	0.519339	62.6462	1.82416	4.09138	0.119135	20.0677	0.58434	32.3484	0.941935	51.9393	1.51239
	193.7	49.0199	1.42738	17.9663	0.523151	62.5055	1.82006	4.18993	0.122004	20.1637	0.587135	32.4656	0.945348	52.1556	1.51869
	193.6	49.3055	1.4357	18.0911	0.526785	62.1617	1.81005	4.28296	0.124713	20.2197	0.588766	32.5691	0.948361	52.3503	1.52436
	193.5	49.5948	1.44412	18.1765	0.529271	61.711	1.79693	4.3709	0.127274	20.2446	0.589491	32.6618	0.951061	52.4863	1.52832
	193.4	49.8305	1.45099	18.2759	0.532166	61.4205	1.78847	4.47918	0.130427	20.271	0.59026	32.7003	0.952182	52.6167	1.53212
	193.3	50.0594	1.45765	18.3956	0.535651	60.9556	1.77493	4.55969	0.132771	20.2888	0.590778	32.7446	0.953472	52.6733	1.53376
	193.2	50.2325	1.46269	18.4161	0.536248	60.6239	1.76527	4.67642	0.13617	20.2814	0.590563	32.7831	0.954593	52.7134	1.53493
	193.1	50.3521	1.46617	18.425	0.536507	60.3526	1.75737	4.79529	0.139631	20.2336	0.589171	32.7909	0.95482	52.7677	1.53651
	193	50.4197	1.46814	18.4223	0.536429	60.0936	1.74983	4.8532	0.141318	20.2015	0.588236	32.7685	0.954168	52.8496	1.5389
	192.9	50.4353	1.4686	18.394	0.535605	59.7864	1.74089	4.90192	0.142736	20.1816	0.587657	32.7576	0.95385	52.9508	1.54184
	192.8	50.4394	1.46872	18.4009	0.535805	59.2509	1.72529	4.92536	0.143419	20.1672	0.587237	32.7942	0.954916	53.0126	1.54364
	192.7	50.411	1.46789	18.407	0.535983	58.8141	1.71257	4.93624	0.143736	20.1356	0.586317	32.8107	0.955396	53.0467	1.54464
	192.6	50.3894	1.46726	18.4224	0.536432	58.4914	1.70318	4.9555	0.144296	20.0581	0.584061	32.8134	0.955475	53.1	1.54619
	192.5	50.3553	1.46627	18.4499	0.537232	58.1387	1.69291	5.01424	0.146007	19.9696	0.581484	32.7875	0.954721	53.1107	1.5465
	192.4	50.3205	1.46525	18.4668	0.537724	57.8177	1.68356	5.08106	0.147953	19.8695	0.578569	32.7386	0.953297	53.0646	1.54516
	192.3	50.2867	1.46427	18.4018	0.535832	57.3395	1.66964	5.06211	0.147401	19.7801	0.575966	32.6529	0.950801	53.0368	1.54435
	192.2	50.2188	1.46229	18.312	0.533217	56.7746	1.65319	4.96883	0.144685	19.707	0.573837	32.5354	0.94738	53.0067	1.54347
	192.1	50.1184	1.45937	18.2511	0.531444	56.2756	1.63866	4.94208	0.143906	19.6279	0.571534	32.3786	0.942814	52.9703	1.54241
	192	50.0066	1.45611	18.1704	0.529094	55.834	1.6258	4.925	0.143408	19.5394	0.568957	32.2608	0.939384	52.9219	1.541
	191.9	49.9533	1.45456	18.0709	0.526196	55.4234	1.61384	4.9027	0.142759	19.4209	0.565506	32.0867	0.934315	52.8897	1.54007
	191.8	49.9271	1.4538	17.978	0.523491	54.9023	1.59867	4.91931	0.143243	19.2384	0.560192	31.9524	0.930404	52.8718	1.53954
	191.7	49.8887	1.45268	17.9283	0.522044	54.3931	1.58384	4.93745	0.143771	19.034	0.55424	31.7758	0.925262	52.8502	1.53892
	191.6	49.7468	1.44855	17.8831	0.520728	53.6538	1.56231	4.94126	0.143882	18.7954	0.547293	31.5907	0.919872	52.8314	1.53837
	191.5	49.5679	1.44334	17.8203	0.518899	52.998	1.54322	4.94017	0.14385	18.563	0.540526	31.4495	0.91576	52.7792	1.53685
	191.4	49.3602	1.43729	17.6765	0.514712	52.1713	1.51915	4.8701	0.14181	18.3705	0.53492	31.3163	0.911882	52.6983	1.53449
	191.3	49.1397	1.43087	17.5327	0.510525	51.5295	1.50046	4.73521	0.137882	18.1549	0.528642	31.2057	0.908661	52.5947	1.53148
	191.2	48.9478	1.42528	17.3136	0.504145	51.0495	1.48648	4.56572	0.132947	17.9722	0.523322	31.0676	0.90464	52.4467	1.52717
	191.1	48.7768	1.4203	17.0306	0.495904	50.4647	1.46945	4.44276	0.129366	17.7614	0.517184	30.9032	0.899853	52.2957	1.52277
	191	48.6747	1.41733	16.7168	0.486767	50.0716	1.45801	4.34859	0.126624	17.5429	0.510822	30.7059	0.894108	52.1309	1.51797
	190.9	48.5856	1.41474	16.4527	0.479077	49.5938	1.44409	4.26724	0.124255	17.293	0.503545	30.5028	0.888194	51.9566	1.5129
	190.8	48.4329	1.41029	16.1501	0.470266	49.1108	1.43003	4.1179	0.119907	17.0192	0.495573	30.2281	0.880195	51.7544	1.50701
	190.7	48.2804	1.40585	15.847	0.46144	48.54	1.41341	3.95337	0.115116	16.809	0.489452	29.9711	0.872712	51.5502	1.50106
	190.6	48.1445	1.40189	15.6428	0.455494	47.8517	1.39337	3.82257	0.111307	16.6201	0.483951	29.6964	0.864713	51.3351	1.4948
	190.5	48.0003	1.39769	15.4861	0.450931	46.898	1.3656	3.74274	0.108983	16.4776	0.479802	29.408	0.856315	51.1163	1.48843
	190.4	47.8279	1.39267	15.4084	0.448669	45.8361	1.33468	3.75017	0.109199	16.354	0.476203	29.1128	0.847719	50.854	1.48079
	190.3	47.661	1.38781	15.3486	0.446927	44.7064	1.30178	3.72208	0.108381	16.2216	0.472348	28.8151	0.839051	50.5599	1.47223
	190.2	47.407	1.38042	15.1984	0.442554	43.247	1.25929	3.69739	0.107662	16.0516	0.467398	28.4942	0.829707	50.2476	1.46313
	190.1	47.1299	1.37235	15.1001	0.439691	41.7989	1.21712	3.74401	0.10902	15.8902	0.462698	28.1476	0.819614	49.9599	1.45475
	190	46.9295	1.36651	15.1021	0.43975	40.6323	1.18315	3.8455	0.111975	15.7687	0.45916	27.8115	0.809827	49.7202	1.44777

## Sheet: Sup. Fig. 4b
Cd spectra after 7 days of incubation at 37C
		Raw data	MRE value	Raw data	MRE value
	Wavelength (nm)	PSMα2	PSMα2	δ-toxin	δ-toxin
	250	-0.13188	-28.5455	-0.50144	-113.448
	249.9	-0.13106	-28.368	-0.50322	-113.851
	249.8	-0.13031	-28.2056	-0.50499	-114.251
	249.7	-0.12962	-28.0563	-0.50675	-114.649
	249.6	-0.129	-27.9221	-0.5085	-115.045
	249.5	-0.12844	-27.8009	-0.51024	-115.439
	249.4	-0.12796	-27.697	-0.51198	-115.833
	249.3	-0.12754	-27.6061	-0.51371	-116.224
	249.2	-0.12719	-27.5303	-0.51543	-116.613
	249.1	-0.1269	-27.4675	-0.51714	-117
	249	-0.12667	-27.4177	-0.51885	-117.387
	248.9	-0.12649	-27.3788	-0.52055	-117.771
	248.8	-0.12637	-27.3528	-0.52225	-118.156
	248.7	-0.12629	-27.3355	-0.52394	-118.538
	248.6	-0.12626	-27.329	-0.52563	-118.921
	248.5	-0.12627	-27.3312	-0.5273	-119.299
	248.4	-0.12631	-27.3398	-0.52898	-119.679
	248.3	-0.12639	-27.3571	-0.53065	-120.057
	248.2	-0.12648	-27.3766	-0.53231	-120.432
	248.1	-0.12659	-27.4004	-0.53396	-120.805
	248	-0.12672	-27.4286	-0.53562	-121.181
	247.9	-0.12685	-27.4567	-0.53726	-121.552
	247.8	-0.12702	-27.4935	-0.5389	-121.923
	247.7	-0.12727	-27.5476	-0.54052	-122.29
	247.6	-0.12779	-27.6602	-0.54211	-122.649
	247.5	-0.13068	-28.2857	-0.54342	-122.946
	247.4	-0.13412	-29.0303	-0.54468	-123.231
	247.3	-0.1381	-29.8918	-0.54591	-123.509
	247.2	-0.14259	-30.8636	-0.54712	-123.783
	247.1	-0.14756	-31.9394	-0.54832	-124.054
	247	-0.15296	-33.1082	-0.54955	-124.333
	246.9	-0.15875	-34.3615	-0.5508	-124.615
	246.8	-0.16491	-35.6948	-0.55208	-124.905
	246.7	-0.17138	-37.0952	-0.55341	-125.206
	246.6	-0.17813	-38.5563	-0.55478	-125.516
	246.5	-0.1851	-40.0649	-0.55618	-125.833
	246.4	-0.19225	-41.6126	-0.55762	-126.158
	246.3	-0.19952	-43.1861	-0.5591	-126.493
	246.2	-0.20684	-44.7706	-0.56061	-126.835
	246.1	-0.21417	-46.3571	-0.56215	-127.183
	246	-0.22147	-47.9372	-0.56372	-127.538
	245.9	-0.2287	-49.5022	-0.56531	-127.898
	245.8	-0.23586	-51.0519	-0.56695	-128.269
	245.7	-0.24291	-52.5779	-0.56863	-128.649
	245.6	-0.24987	-54.0844	-0.57037	-129.043
	245.5	-0.25672	-55.5671	-0.57217	-129.45
	245.4	-0.26343	-57.0195	-0.57405	-129.876
	245.3	-0.26999	-58.4394	-0.57601	-130.319
	245.2	-0.27634	-59.8139	-0.57806	-130.783
	245.1	-0.28244	-61.1342	-0.58021	-131.269
	245	-0.2882	-62.381	-0.58247	-131.781
	244.9	-0.29358	-63.5455	-0.58484	-132.317
	244.8	-0.2985	-64.6104	-0.58734	-132.882
	244.7	-0.30291	-65.5649	-0.58995	-133.473
	244.6	-0.30675	-66.3961	-0.59269	-134.093
	244.5	-0.30998	-67.0952	-0.59554	-134.738
	244.4	-0.31255	-67.6515	-0.59852	-135.412
	244.3	-0.31445	-68.0628	-0.60161	-136.111
	244.2	-0.31565	-68.3225	-0.60479	-136.83
	244.1	-0.31616	-68.4329	-0.60806	-137.57
	244	-0.316	-68.3983	-0.61137	-138.319
	243.9	-0.31518	-68.2208	-0.61471	-139.075
	243.8	-0.31376	-67.9134	-0.61804	-139.828
	243.7	-0.31177	-67.4827	-0.62132	-140.57
	243.6	-0.30928	-66.9437	-0.62453	-141.296
	243.5	-0.30632	-66.303	-0.62765	-142.002
	243.4	-0.30297	-65.5779	-0.63066	-142.683
	243.3	-0.29926	-64.7749	-0.63355	-143.337
	243.2	-0.29526	-63.9091	-0.63632	-143.964
	243.1	-0.29103	-62.9935	-0.63899	-144.568
	243	-0.28664	-62.0433	-0.64156	-145.149
	242.9	-0.28215	-61.0714	-0.64406	-145.715
	242.8	-0.27764	-60.0952	-0.64649	-146.265
	242.7	-0.27322	-59.1385	-0.64888	-146.805
	242.6	-0.26897	-58.2186	-0.65124	-147.339
	242.5	-0.26499	-57.3571	-0.65358	-147.869
	242.4	-0.26138	-56.5758	-0.6559	-148.394
	242.3	-0.25822	-55.8918	-0.65821	-148.916
	242.2	-0.25559	-55.3225	-0.66051	-149.437
	242.1	-0.25354	-54.8788	-0.66278	-149.95
	242	-0.2521	-54.5671	-0.66502	-150.457
	241.9	-0.25132	-54.3983	-0.66721	-150.952
	241.8	-0.25122	-54.3766	-0.66934	-151.434
	241.7	-0.25185	-54.513	-0.67139	-151.898
	241.6	-0.25323	-54.8117	-0.67334	-152.339
	241.5	-0.25542	-55.2857	-0.67518	-152.756
	241.4	-0.25846	-55.9437	-0.6769	-153.145
	241.3	-0.26236	-56.7879	-0.6785	-153.507
	241.2	-0.26718	-57.8312	-0.67996	-153.837
	241.1	-0.27292	-59.0736	-0.68131	-154.143
	241	-0.27957	-60.513	-0.68254	-154.421
	240.9	-0.28712	-62.1472	-0.68367	-154.676
	240.8	-0.29551	-63.9632	-0.68472	-154.914
	240.7	-0.30468	-65.9481	-0.68574	-155.145
	240.6	-0.31457	-68.0887	-0.68676	-155.376
	240.5	-0.32511	-70.3701	-0.68782	-155.615
	240.4	-0.33624	-72.7792	-0.68897	-155.876
	240.3	-0.34793	-75.3095	-0.69027	-156.17
	240.2	-0.36012	-77.9481	-0.69174	-156.502
	240.1	-0.37276	-80.684	-0.69343	-156.885
	240	-0.38579	-83.5043	-0.69535	-157.319
	239.9	-0.39916	-86.3983	-0.6975	-157.805
	239.8	-0.41277	-89.3442	-0.69988	-158.344
	239.7	-0.42654	-92.3247	-0.70248	-158.932
	239.6	-0.44037	-95.3182	-0.70531	-159.572
	239.5	-0.45415	-98.3009	-0.70834	-160.258
	239.4	-0.46779	-101.253	-0.71158	-160.991
	239.3	-0.4812	-104.156	-0.71503	-161.771
	239.2	-0.49432	-106.996	-0.71867	-162.595
	239.1	-0.50708	-109.758	-0.72252	-163.466
	239	-0.51947	-112.439	-0.72656	-164.38
	238.9	-0.53145	-115.032	-0.73079	-165.337
	238.8	-0.54302	-117.537	-0.73522	-166.339
	238.7	-0.55417	-119.95	-0.73984	-167.385
	238.6	-0.5649	-122.273	-0.74469	-168.482
	238.5	-0.57523	-124.509	-0.74976	-169.629
	238.4	-0.58519	-126.665	-0.75509	-170.835
	238.3	-0.59482	-128.749	-0.76069	-172.102
	238.2	-0.60417	-130.773	-0.76659	-173.437
	238.1	-0.61331	-132.751	-0.77282	-174.846
	238	-0.6223	-134.697	-0.77938	-176.33
	237.9	-0.6312	-136.623	-0.7863	-177.896
	237.8	-0.64007	-138.543	-0.79356	-179.538
	237.7	-0.64894	-140.463	-0.80115	-181.256
	237.6	-0.65785	-142.392	-0.80906	-183.045
	237.5	-0.6668	-144.329	-0.81726	-184.9
	237.4	-0.67581	-146.279	-0.82571	-186.812
	237.3	-0.68492	-148.251	-0.83436	-188.769
	237.2	-0.69416	-150.251	-0.84319	-190.767
	237.1	-0.70356	-152.286	-0.85213	-192.79
	237	-0.71317	-154.366	-0.86115	-194.83
	236.9	-0.72302	-156.498	-0.87021	-196.88
	236.8	-0.73313	-158.686	-0.87929	-198.934
	236.7	-0.74351	-160.933	-0.88836	-200.986
	236.6	-0.75417	-163.24	-0.89741	-203.034
	236.5	-0.76511	-165.608	-0.90645	-205.079
	236.4	-0.77632	-168.035	-0.91548	-207.122
	236.3	-0.78778	-170.515	-0.92449	-209.161
	236.2	-0.7995	-173.052	-0.9335	-211.199
	236.1	-0.81149	-175.647	-0.94251	-213.238
	236	-0.82377	-178.305	-0.95151	-215.274
	235.9	-0.83638	-181.035	-0.9605	-217.308
	235.8	-0.84933	-183.838	-0.96948	-219.339
	235.7	-0.86264	-186.719	-0.97843	-221.364
	235.6	-0.87627	-189.669	-0.98737	-223.387
	235.5	-0.8902	-192.684	-0.99627	-225.4
	235.4	-0.90437	-195.751	-1.00513	-227.405
	235.3	-0.9187	-198.853	-1.01396	-229.403
	235.2	-0.93314	-201.978	-1.02273	-231.387
	235.1	-0.94764	-205.117	-1.03146	-233.362
	235	-0.96217	-208.262	-1.04013	-235.324
	234.9	-0.97675	-211.418	-1.04874	-237.271
	234.8	-0.99139	-214.587	-1.05727	-239.201
	234.7	-1.0061	-217.771	-1.06572	-241.113
	234.6	-1.02092	-220.978	-1.0741	-243.009
	234.5	-1.03587	-224.214	-1.08242	-244.891
	234.4	-1.05098	-227.485	-1.09068	-246.76
	234.3	-1.06627	-230.794	-1.09891	-248.622
	234.2	-1.08174	-234.143	-1.10714	-250.484
	234.1	-1.09742	-237.537	-1.11539	-252.351
	234	-1.11334	-240.983	-1.12368	-254.226
	233.9	-1.12953	-244.487	-1.13203	-256.115
	233.8	-1.14604	-248.061	-1.14046	-258.023
	233.7	-1.16293	-251.716	-1.14896	-259.946
	233.6	-1.18025	-255.465	-1.15755	-261.889
	233.5	-1.19803	-259.314	-1.1662	-263.846
	233.4	-1.2163	-263.268	-1.17491	-265.817
	233.3	-1.23505	-267.327	-1.18366	-267.796
	233.2	-1.25426	-271.485	-1.19243	-269.781
	233.1	-1.27392	-275.74	-1.20122	-271.769
	233	-1.29399	-280.084	-1.21001	-273.758
	232.9	-1.31447	-284.517	-1.2188	-275.747
	232.8	-1.33534	-289.035	-1.22761	-277.74
	232.7	-1.35659	-293.634	-1.23644	-279.738
	232.6	-1.37823	-298.318	-1.24531	-281.744
	232.5	-1.40028	-303.091	-1.25425	-283.767
	232.4	-1.42273	-307.95	-1.26329	-285.812
	232.3	-1.4456	-312.9	-1.27244	-287.882
	232.2	-1.46887	-317.937	-1.28172	-289.982
	232.1	-1.49253	-323.058	-1.29116	-292.118
	232	-1.51654	-328.255	-1.30076	-294.29
	231.9	-1.54086	-333.519	-1.31053	-296.5
	231.8	-1.56545	-338.842	-1.32045	-298.744
	231.7	-1.59025	-344.21	-1.33053	-301.025
	231.6	-1.6152	-349.61	-1.34074	-303.335
	231.5	-1.64021	-355.024	-1.35109	-305.676
	231.4	-1.66523	-360.439	-1.36155	-308.043
	231.3	-1.69015	-365.833	-1.3721	-310.43
	231.2	-1.71489	-371.188	-1.38274	-312.837
	231.1	-1.73935	-376.483	-1.39344	-315.258
	231	-1.7634	-381.688	-1.40416	-317.683
	230.9	-1.78696	-386.788	-1.41489	-320.111
	230.8	-1.80991	-391.755	-1.42558	-322.529
	230.7	-1.83218	-396.576	-1.43622	-324.937
	230.6	-1.85372	-401.238	-1.4468	-327.33
	230.5	-1.87449	-405.734	-1.45729	-329.704
	230.4	-1.89449	-410.063	-1.46771	-332.061
	230.3	-1.91375	-414.232	-1.47805	-334.4
	230.2	-1.93226	-418.238	-1.4883	-336.719
	230.1	-1.95005	-422.089	-1.49846	-339.018
	230	-1.96717	-425.794	-1.50855	-341.301
	229.9	-1.98367	-429.366	-1.51855	-343.563
	229.8	-1.99961	-432.816	-1.52847	-345.808
	229.7	-2.01508	-436.165	-1.5383	-348.032
	229.6	-2.03016	-439.429	-1.54803	-350.233
	229.5	-2.04493	-442.626	-1.55765	-352.41
	229.4	-2.05949	-445.777	-1.56715	-354.559
	229.3	-2.0739	-448.896	-1.57649	-356.672
	229.2	-2.08822	-451.996	-1.58567	-358.749
	229.1	-2.10252	-455.091	-1.59465	-360.781
	229	-2.1168	-458.182	-1.6034	-362.76
	228.9	-2.1311	-461.277	-1.61192	-364.688
	228.8	-2.14539	-464.37	-1.62016	-366.552
	228.7	-2.15968	-467.463	-1.62812	-368.353
	228.6	-2.17399	-470.561	-1.63579	-370.088
	228.5	-2.18835	-473.669	-1.64317	-371.758
	228.4	-2.20278	-476.792	-1.65028	-373.367
	228.3	-2.21735	-479.946	-1.65713	-374.916
	228.2	-2.23208	-483.134	-1.66375	-376.414
	228.1	-2.247	-486.364	-1.67015	-377.862
	228	-2.26214	-489.641	-1.67637	-379.269
	227.9	-2.2775	-492.965	-1.68244	-380.643
	227.8	-2.29308	-496.338	-1.68838	-381.986
	227.7	-2.30887	-499.755	-1.69423	-383.31
	227.6	-2.32484	-503.212	-1.70001	-384.618
	227.5	-2.341	-506.71	-1.70574	-385.914
	227.4	-2.35733	-510.245	-1.71145	-387.206
	227.3	-2.37384	-513.818	-1.71716	-388.498
	227.2	-2.39053	-517.431	-1.72285	-389.785
	227.1	-2.4074	-521.082	-1.72852	-391.068
	227	-2.42441	-524.764	-1.73418	-392.348
	226.9	-2.44152	-528.468	-1.7398	-393.62
	226.8	-2.45867	-532.18	-1.74536	-394.878
	226.7	-2.47579	-535.885	-1.75084	-396.118
	226.6	-2.49278	-539.563	-1.75623	-397.337
	226.5	-2.50954	-543.19	-1.76149	-398.527
	226.4	-2.52597	-546.747	-1.76662	-399.688
	226.3	-2.54197	-550.21	-1.7716	-400.814
	226.2	-2.55745	-553.561	-1.77643	-401.907
	226.1	-2.57235	-556.786	-1.78112	-402.968
	226	-2.58663	-559.877	-1.78566	-403.995
	225.9	-2.60024	-562.823	-1.79008	-404.995
	225.8	-2.61314	-565.615	-1.79439	-405.971
	225.7	-2.6253	-568.247	-1.7986	-406.923
	225.6	-2.63669	-570.712	-1.80273	-407.857
	225.5	-2.64728	-573.004	-1.80682	-408.783
	225.4	-2.65706	-575.121	-1.8109	-409.706
	225.3	-2.66604	-577.065	-1.81497	-410.627
	225.2	-2.67425	-578.842	-1.81907	-411.554
	225.1	-2.68173	-580.461	-1.8232	-412.489
	225	-2.68852	-581.931	-1.82736	-413.43
	224.9	-2.69466	-583.26	-1.83153	-414.373
	224.8	-2.70018	-584.455	-1.8357	-415.317
	224.7	-2.70513	-585.526	-1.83986	-416.258
	224.6	-2.70954	-586.481	-1.84399	-417.192
	224.5	-2.71344	-587.325	-1.84807	-418.115
	224.4	-2.71686	-588.065	-1.85212	-419.032
	224.3	-2.71982	-588.706	-1.85612	-419.937
	224.2	-2.72234	-589.251	-1.86013	-420.844
	224.1	-2.72446	-589.71	-1.86416	-421.756
	224	-2.72618	-590.082	-1.86829	-422.69
	223.9	-2.72753	-590.374	-1.87256	-423.656
	223.8	-2.72851	-590.587	-1.87704	-424.67
	223.7	-2.72912	-590.719	-1.8818	-425.747
	223.6	-2.72937	-590.773	-1.8869	-426.9
	223.5	-2.72924	-590.745	-1.89241	-428.147
	223.4	-2.72874	-590.636	-1.89839	-429.5
	223.3	-2.72791	-590.457	-1.90488	-430.968
	223.2	-2.72681	-590.219	-1.91193	-432.563
	223.1	-2.7255	-589.935	-1.91957	-434.292
	223	-2.72407	-589.626	-1.9278	-436.154
	222.9	-2.72261	-589.31	-1.93663	-438.152
	222.8	-2.72118	-589	-1.94602	-440.276
	222.7	-2.71987	-588.716	-1.95594	-442.52
	222.6	-2.71874	-588.472	-1.96633	-444.871
	222.5	-2.71783	-588.275	-1.97713	-447.314
	222.4	-2.71718	-588.134	-1.98826	-449.833
	222.3	-2.71683	-588.058	-1.99969	-452.419
	222.2	-2.71676	-588.043	-2.01135	-455.057
	222.1	-2.71698	-588.091	-2.02321	-457.74
	222	-2.71746	-588.195	-2.03525	-460.464
	221.9	-2.71813	-588.34	-2.04747	-463.229
	221.8	-2.71893	-588.513	-2.05985	-466.029
	221.7	-2.71973	-588.686	-2.07238	-468.864
	221.6	-2.72044	-588.84	-2.08507	-471.735
	221.5	-2.72095	-588.95	-2.0979	-474.638
	221.4	-2.72117	-588.998	-2.11085	-477.568
	221.3	-2.72102	-588.965	-2.12389	-480.518
	221.2	-2.72047	-588.846	-2.137	-483.484
	221.1	-2.71948	-588.632	-2.15014	-486.457
	221	-2.71805	-588.323	-2.16326	-489.425
	220.9	-2.7162	-587.922	-2.17631	-492.378
	220.8	-2.71396	-587.437	-2.18924	-495.303
	220.7	-2.71136	-586.874	-2.20197	-498.183
	220.6	-2.70844	-586.242	-2.21445	-501.007
	220.5	-2.70528	-585.558	-2.2266	-503.756
	220.4	-2.70194	-584.835	-2.23835	-506.414
	220.3	-2.69852	-584.095	-2.24966	-508.973
	220.2	-2.69513	-583.361	-2.26047	-511.419
	220.1	-2.69191	-582.665	-2.27079	-513.753
	220	-2.689	-582.035	-2.2806	-515.973
	219.9	-2.68653	-581.5	-2.28991	-518.079
	219.8	-2.6846	-581.082	-2.29874	-520.077
	219.7	-2.6833	-580.801	-2.3071	-521.968
	219.6	-2.68267	-580.665	-2.31503	-523.762
	219.5	-2.68274	-580.68	-2.32256	-525.466
	219.4	-2.68349	-580.842	-2.32974	-527.09
	219.3	-2.68494	-581.156	-2.33662	-528.647
	219.2	-2.68707	-581.617	-2.34326	-530.149
	219.1	-2.6899	-582.229	-2.3497	-531.606
	219	-2.69343	-582.994	-2.356	-533.032
	218.9	-2.69767	-583.911	-2.36217	-534.428
	218.8	-2.70263	-584.985	-2.36823	-535.799
	218.7	-2.70833	-586.219	-2.37418	-537.145
	218.6	-2.71473	-587.604	-2.38002	-538.466
	218.5	-2.72179	-589.132	-2.38577	-539.767
	218.4	-2.72943	-590.786	-2.39142	-541.045
	218.3	-2.73756	-592.545	-2.39698	-542.303
	218.2	-2.74607	-594.387	-2.40246	-543.543
	218.1	-2.75487	-596.292	-2.40789	-544.771
	218	-2.7639	-598.247	-2.41331	-545.998
	217.9	-2.77308	-600.234	-2.41876	-547.231
	217.8	-2.78235	-602.24	-2.4243	-548.484
	217.7	-2.79163	-604.249	-2.42998	-549.769
	217.6	-2.80082	-606.238	-2.43583	-551.093
	217.5	-2.80983	-608.188	-2.44189	-552.464
	217.4	-2.81857	-610.08	-2.44818	-553.887
	217.3	-2.82692	-611.887	-2.45471	-555.364
	217.2	-2.83481	-613.595	-2.46146	-556.891
	217.1	-2.84218	-615.19	-2.46842	-558.466
	217	-2.84895	-616.656	-2.47556	-560.081
	216.9	-2.85511	-617.989	-2.48283	-561.726
	216.8	-2.86063	-619.184	-2.49021	-563.396
	216.7	-2.8655	-620.238	-2.49767	-565.084
	216.6	-2.86971	-621.149	-2.5052	-566.787
	216.5	-2.87326	-621.918	-2.51279	-568.505
	216.4	-2.87613	-622.539	-2.52044	-570.235
	216.3	-2.87832	-623.013	-2.52814	-571.977
	216.2	-2.87982	-623.338	-2.53588	-573.729
	216.1	-2.88064	-623.515	-2.54364	-575.484
	216	-2.88078	-623.545	-2.55136	-577.231
	215.9	-2.88029	-623.439	-2.55901	-578.962
	215.8	-2.87921	-623.206	-2.56657	-580.672
	215.7	-2.87757	-622.851	-2.57401	-582.355
	215.6	-2.87539	-622.379	-2.58132	-584.009
	215.5	-2.8727	-621.797	-2.58851	-585.636
	215.4	-2.86953	-621.11	-2.59558	-587.235
	215.3	-2.86593	-620.331	-2.6025	-588.801
	215.2	-2.86194	-619.468	-2.60923	-590.324
	215.1	-2.85767	-618.543	-2.61572	-591.792
	215	-2.85318	-617.571	-2.6219	-593.19
	214.9	-2.8486	-616.58	-2.62773	-594.509
	214.8	-2.84399	-615.582	-2.63311	-595.726
	214.7	-2.83943	-614.595	-2.63797	-596.826
	214.6	-2.83496	-613.628	-2.64222	-597.787
	214.5	-2.8306	-612.684	-2.64577	-598.59
	214.4	-2.82635	-611.764	-2.64856	-599.222
	214.3	-2.82218	-610.861	-2.65056	-599.674
	214.2	-2.81806	-609.97	-2.65174	-599.941
	214.1	-2.81392	-609.074	-2.65211	-600.025
	214	-2.8097	-608.16	-2.65169	-599.93
	213.9	-2.80537	-607.223	-2.65052	-599.665
	213.8	-2.80088	-606.251	-2.64862	-599.235
	213.7	-2.79623	-605.245	-2.64603	-598.649
	213.6	-2.79142	-604.203	-2.64277	-597.912
	213.5	-2.78648	-603.134	-2.63888	-597.032
	213.4	-2.78142	-602.039	-2.63438	-596.014
	213.3	-2.77627	-600.924	-2.6293	-594.864
	213.2	-2.77106	-599.797	-2.62367	-593.59
	213.1	-2.76585	-598.669	-2.61749	-592.192
	213	-2.76069	-597.552	-2.61078	-590.674
	212.9	-2.75567	-596.465	-2.60356	-589.041
	212.8	-2.7509	-595.433	-2.59589	-587.305
	212.7	-2.74646	-594.472	-2.58782	-585.48
	212.6	-2.74243	-593.6	-2.57941	-583.577
	212.5	-2.73884	-592.823	-2.57075	-581.618
	212.4	-2.73574	-592.152	-2.56188	-579.611
	212.3	-2.73314	-591.589	-2.55287	-577.572
	212.2	-2.73103	-591.132	-2.54377	-575.514
	212.1	-2.72939	-590.777	-2.53461	-573.441
	212	-2.72816	-590.511	-2.52544	-571.367
	211.9	-2.72726	-590.316	-2.51634	-569.308
	211.8	-2.72662	-590.177	-2.50735	-567.274
	211.7	-2.72617	-590.08	-2.49854	-565.281
	211.6	-2.72584	-590.009	-2.48999	-563.346
	211.5	-2.72559	-589.955	-2.48183	-561.5
	211.4	-2.72537	-589.907	-2.47418	-559.769
	211.3	-2.7252	-589.87	-2.46719	-558.188
	211.2	-2.72507	-589.842	-2.46101	-556.79
	211.1	-2.725	-589.827	-2.45575	-555.6
	211	-2.72502	-589.831	-2.4515	-554.638
	210.9	-2.72518	-589.866	-2.44831	-553.916
	210.8	-2.72553	-589.942	-2.4462	-553.439
	210.7	-2.72612	-590.069	-2.44516	-553.204
	210.6	-2.72696	-590.251	-2.44515	-553.201
	210.5	-2.72809	-590.496	-2.44612	-553.421
	210.4	-2.72951	-590.803	-2.44805	-553.857
	210.3	-2.73124	-591.177	-2.4509	-554.502
	210.2	-2.73327	-591.617	-2.45465	-555.351
	210.1	-2.73556	-592.113	-2.45926	-556.394
	210	-2.73809	-592.66	-2.4647	-557.624
	209.9	-2.74081	-593.249	-2.47092	-559.032
	209.8	-2.74365	-593.864	-2.47793	-560.618
	209.7	-2.74656	-594.494	-2.48569	-562.373
	209.6	-2.74945	-595.119	-2.49419	-564.296
	209.5	-2.75226	-595.727	-2.50337	-566.373
	209.4	-2.75489	-596.297	-2.51316	-568.588
	209.3	-2.75725	-596.807	-2.52345	-570.916
	209.2	-2.75925	-597.24	-2.53414	-573.335
	209.1	-2.76081	-597.578	-2.5451	-575.814
	209	-2.76188	-597.81	-2.55624	-578.335
	208.9	-2.76242	-597.926	-2.56743	-580.867
	208.8	-2.76239	-597.92	-2.57858	-583.389
	208.7	-2.76172	-597.775	-2.58954	-585.869
	208.6	-2.76037	-597.483	-2.60018	-588.276
	208.5	-2.75826	-597.026	-2.61037	-590.581
	208.4	-2.75531	-596.387	-2.61994	-592.747
	208.3	-2.75144	-595.55	-2.6287	-594.729
	208.2	-2.74653	-594.487	-2.63646	-596.484
	208.1	-2.74045	-593.171	-2.64299	-597.962
	208	-2.73307	-591.574	-2.64805	-599.106
	207.9	-2.72426	-589.667	-2.65143	-599.871
	207.8	-2.71395	-587.435	-2.65295	-600.215
	207.7	-2.70213	-584.877	-2.65243	-600.097
	207.6	-2.68885	-582.002	-2.64976	-599.493
	207.5	-2.67416	-578.823	-2.64488	-598.389
	207.4	-2.65811	-575.348	-2.63775	-596.776
	207.3	-2.64073	-571.587	-2.6284	-594.661
	207.2	-2.62204	-567.541	-2.61687	-592.052
	207.1	-2.602	-563.203	-2.60326	-588.973
	207	-2.58058	-558.567	-2.58764	-585.439
	206.9	-2.55772	-553.619	-2.57011	-581.473
	206.8	-2.53337	-548.348	-2.55077	-577.097
	206.7	-2.50745	-542.738	-2.52966	-572.321
	206.6	-2.47988	-536.771	-2.50681	-567.152
	206.5	-2.4506	-530.433	-2.48218	-561.579
	206.4	-2.41954	-523.71	-2.45575	-555.6
	206.3	-2.38663	-516.587	-2.42745	-549.197
	206.2	-2.35182	-509.052	-2.39724	-542.362
	206.1	-2.31506	-501.095	-2.36508	-535.086
	206	-2.2763	-492.706	-2.33095	-527.364
	205.9	-2.23551	-483.877	-2.29485	-519.197
	205.8	-2.19266	-474.602	-2.25682	-510.593
	205.7	-2.14775	-464.881	-2.21693	-501.568
	205.6	-2.10084	-454.727	-2.17531	-492.152
	205.5	-2.05203	-444.162	-2.13212	-482.38
	205.4	-2.00148	-433.221	-2.08756	-472.299
	205.3	-1.94938	-421.944	-2.04189	-461.966
	205.2	-1.89593	-410.374	-1.99538	-451.443
	205.1	-1.84133	-398.556	-1.94833	-440.799
	205	-1.78574	-386.524	-1.90109	-430.111
	204.9	-1.7293	-374.307	-1.85398	-419.452
	204.8	-1.6721	-361.926	-1.8073	-408.891
	204.7	-1.6142	-349.394	-1.76135	-398.495
	204.6	-1.55561	-336.712	-1.71637	-388.319
	204.5	-1.49628	-323.87	-1.67255	-378.405
	204.4	-1.43608	-310.84	-1.63002	-368.783
	204.3	-1.37486	-297.589	-1.58885	-359.468
	204.2	-1.31246	-284.082	-1.54907	-350.468
	204.1	-1.24869	-270.279	-1.51067	-341.781
	204	-1.18341	-256.149	-1.47364	-333.403
	203.9	-1.11655	-241.677	-1.43793	-325.324
	203.8	-1.04806	-226.853	-1.40354	-317.543
	203.7	-0.978	-211.688	-1.37041	-310.048
	203.6	-0.9065	-196.212	-1.33854	-302.837
	203.5	-0.83379	-180.474	-1.3079	-295.905
	203.4	-0.76018	-164.541	-1.27854	-289.262
	203.3	-0.68607	-148.5	-1.2505	-282.919
	203.2	-0.61194	-132.455	-1.22383	-276.885
	203.1	-0.5383	-116.515	-1.19863	-271.183
	203	-0.46565	-100.79	-1.17495	-265.826
	202.9	-0.39445	-85.3788	-1.15288	-260.833
	202.8	-0.32511	-70.3701	-1.1325	-256.222
	202.7	-0.25795	-55.8333	-1.1139	-252.014
	202.6	-0.1933	-41.8398	-1.09715	-248.224
	202.5	-0.13137	-28.4351	-1.08224	-244.851
	202.4	-0.07994	-17.303	-1.07367	-242.912
	202.3	-0.03196	-6.91775	-1.06542	-241.045
	202.2	0.01437	3.11039	-1.05734	-239.217
	202.1	0.06004	12.9957	-1.04936	-237.412
	202	0.10547	22.829	-1.04149	-235.631
	201.9	0.15084	32.6494	-1.0337	-233.869
	201.8	0.19624	42.4762	-1.02602	-232.131
	201.7	0.24169	52.3139	-1.01844	-230.416
	201.6	0.28718	62.1602	-1.01095	-228.722
	201.5	0.33268	72.0087	-1.00355	-227.048
	201.4	0.37816	81.8528	-0.99624	-225.394
	201.3	0.42357	91.6818	-0.98901	-223.758
	201.2	0.46884	101.481	-0.98186	-222.14
	201.1	0.51393	111.24	-0.97478	-220.538
	201	0.55877	120.946	-0.96777	-218.952
	200.9	0.60329	130.582	-0.96083	-217.382
	200.8	0.64742	140.134	-0.95395	-215.826
	200.7	0.69112	149.593	-0.94713	-214.283
	200.6	0.73432	158.944	-0.94038	-212.756
	200.5	0.77699	168.18	-0.93368	-211.24
	200.4	0.81908	177.29	-0.92704	-209.738
	200.3	0.86057	186.271	-0.92045	-208.247
	200.2	0.90147	195.123	-0.91391	-206.767
	200.1	0.94176	203.844	-0.90743	-205.301

## Sheet: Sup. Fig. 4c
Ellipticity (mdeg) of fibrils incubated at different concentration of urea
		Urea [M]	PSMα1	Sd	PSMα3	Sd	PSMα4	Sd	PSMβ1	Sd	PSMβ2	Sd
		0	-8.81034	0.405	-4.64012	0.6	-16.1719	0.036	-14.2095	0.37	-13.4221	0.744
		1	-9.11348	0.351	-4.32854	0.11	-15.624	0.073	-14.4571	1.3	-13.3491	0.739
		2	-9.24518	0.586	-4.27194	0.58	-15.2505	0.119	-14.3863	1.2	-13.1526	1.14
		3	-9.39089	0.649	-5.70565	0.35	-16.3803	0.071	-14.7346	1.9	-13.1149	0.84
		4	-9.37605	0.518	-5.26721	0.64	-16.1334	0.104	-14.4089	2.1	-13.1076	0.45
		5	-9.11986	0.538	-6.49066	0.35	-15.8578	0.016	-15.0472	1.7	-12.8746	1.26
		6	-9.25238	0.327	-7.32098	0.1	-16.5702	0.118	-15.2766	1.4	-12.6324	0.51
		7	-8.82081	0.159	-8.08283	0.14	-15.5276	0.021	-14.4852	1.1	-12.2182	0.99
		8	-9.78389	0.492	-7.74991	0.04	-16.0123	0.331	-15.7918	1.5	-12.3825	0.56

## Sheet: Sup. Fig. 4d
CD spectra of PSMa3 fibrils in the absence and presence fo 5, 6, 7 and 8M of urea
					Average			Average				Average				Average				Average
	Wavelength (nm)	0M UREA	0M UREA	0M UREA	0M urea	5M UREA	5M UREA	5M urea	6M UREA	6M UREA	6M UREA	6M urea	7M UREA	7M UREA	7M UREA	7M urea	8M UREA	8M UREA	8M UREA	8M urea
	250	3.54499	4.23887	4.16876	3.98421	2.17212	1.94519	2.05865	0.789945	0.770108	0.879902	0.813318	0.845383	0.875645	0.511719	0.744249	0.32682	0.469754	0.555426	0.450667
	249.9	3.54069	4.24375	4.15199	3.97881	2.17738	1.9352	2.05629	0.779675	0.766537	0.880459	0.80889	0.808591	0.878528	0.509363	0.732161	0.330466	0.449229	0.551549	0.443748
	249.8	3.53733	4.23365	4.14371	3.97156	2.18888	1.923	2.05594	0.772267	0.756441	0.873782	0.80083	0.774731	0.870537	0.503596	0.716288	0.334453	0.442873	0.549513	0.44228
	249.7	3.5333	4.22765	4.12931	3.96342	2.20033	1.91667	2.0585	0.758407	0.74976	0.876842	0.795003	0.759331	0.864917	0.495993	0.706747	0.328673	0.442891	0.538926	0.43683
	249.6	3.53211	4.22436	4.10932	3.95526	2.20553	1.90921	2.05737	0.749906	0.74066	0.883476	0.791347	0.779698	0.866115	0.480772	0.708862	0.322748	0.465982	0.524807	0.437846
	249.5	3.53467	4.22436	4.10259	3.95387	2.20622	1.90284	2.05453	0.744671	0.72198	0.882454	0.783035	0.794206	0.853896	0.459162	0.702421	0.313027	0.484227	0.510434	0.435896
	249.4	3.54265	4.22656	4.08623	3.95181	2.19962	1.89833	2.04897	0.734676	0.706761	0.866764	0.7694	0.81591	0.838988	0.456732	0.703877	0.311064	0.497214	0.496158	0.434812
	249.3	3.54293	4.22686	4.06462	3.9448	2.18559	1.88675	2.03617	0.734055	0.693394	0.856133	0.761194	0.849759	0.836467	0.457954	0.714727	0.314911	0.497185	0.486915	0.433004
	249.2	3.54271	4.22492	4.04406	3.93723	2.16334	1.86952	2.01643	0.721731	0.68488	0.851194	0.752602	0.873961	0.823247	0.462362	0.719857	0.318845	0.480569	0.487507	0.428974
	249.1	3.53593	4.21401	4.02395	3.92463	2.14537	1.85206	1.99872	0.703043	0.675812	0.850463	0.743106	0.896297	0.803606	0.459198	0.7197	0.319032	0.460611	0.491241	0.423628
	249	3.52026	4.19474	4.01181	3.90894	2.13851	1.84444	1.99148	0.68589	0.651746	0.846923	0.728186	0.916199	0.78829	0.460992	0.721827	0.324447	0.452769	0.493156	0.423457
	248.9	3.50901	4.16231	3.99385	3.88839	2.13523	1.83687	1.98605	0.675755	0.629207	0.832159	0.712374	0.949474	0.761479	0.454867	0.72194	0.324596	0.447182	0.488699	0.420159
	248.8	3.50659	4.13468	3.97782	3.87303	2.13419	1.8203	1.97724	0.675781	0.611279	0.816998	0.701353	0.973666	0.746783	0.441619	0.720689	0.316104	0.435013	0.489555	0.413557
	248.7	3.49344	4.11379	3.96592	3.85772	2.12567	1.79463	1.96015	0.674458	0.585179	0.813728	0.691122	0.978694	0.71774	0.43053	0.708988	0.302965	0.414633	0.485064	0.400887
	248.6	3.4757	4.11124	3.95297	3.84664	2.11256	1.7689	1.94073	0.668173	0.558879	0.808626	0.678559	0.981682	0.70334	0.410361	0.698461	0.28893	0.4033	0.475573	0.389268
	248.5	3.46191	4.10967	3.93377	3.83512	2.11155	1.74901	1.93028	0.670396	0.536542	0.798236	0.668391	0.972629	0.686853	0.385623	0.681702	0.264314	0.398405	0.472909	0.378543
	248.4	3.45236	4.13111	3.91924	3.83424	2.11279	1.73372	1.92325	0.671706	0.516731	0.785916	0.658118	0.972064	0.687051	0.37246	0.677192	0.249047	0.388647	0.477781	0.371825
	248.3	3.44124	4.15185	3.90503	3.83271	2.10947	1.72369	1.91658	0.669152	0.499542	0.780887	0.64986	0.971207	0.682474	0.370269	0.67465	0.23987	0.388472	0.481996	0.370113
	248.2	3.42406	4.15915	3.89198	3.82506	2.109	1.70985	1.90943	0.66939	0.492908	0.772768	0.645022	0.960616	0.671036	0.365925	0.665859	0.233997	0.389214	0.481862	0.368358
	248.1	3.39998	4.1643	3.88011	3.8148	2.10762	1.69655	1.90209	0.674738	0.488959	0.763661	0.642453	0.956839	0.6588	0.356357	0.657332	0.231579	0.401019	0.480267	0.370955
	248	3.37857	4.17045	3.86614	3.80505	2.10895	1.6834	1.89617	0.686009	0.467601	0.757015	0.636875	0.954298	0.655951	0.344423	0.651557	0.221006	0.421822	0.474084	0.372304
	247.9	3.35499	4.17578	3.84584	3.7922	2.09572	1.66795	1.88184	0.690598	0.451918	0.752273	0.631596	0.940091	0.659229	0.34057	0.64663	0.207537	0.423375	0.469047	0.366653
	247.8	3.33248	4.18503	3.82188	3.7798	2.07814	1.64554	1.86184	0.699095	0.453105	0.746353	0.632851	0.91946	0.644003	0.334682	0.632715	0.195904	0.425174	0.459028	0.360035
	247.7	3.29857	4.19307	3.80179	3.76448	2.06022	1.62373	1.84198	0.701216	0.453384	0.738979	0.631193	0.895679	0.610034	0.322113	0.609275	0.187642	0.43217	0.454627	0.358146
	247.6	3.27631	4.19931	3.78346	3.75303	2.04413	1.59731	1.82072	0.688776	0.443907	0.737955	0.623546	0.867598	0.57901	0.309177	0.585262	0.174653	0.427911	0.444527	0.34903
	247.5	3.26339	4.19256	3.75762	3.73786	2.02156	1.57153	1.79655	0.66323	0.427557	0.735382	0.608723	0.853818	0.567461	0.298862	0.57338	0.161183	0.416411	0.436884	0.338159
	247.4	3.25394	4.17927	3.71344	3.71555	2.00289	1.55507	1.77898	0.6467	0.42348	0.729543	0.599908	0.862018	0.55899	0.287711	0.569573	0.144226	0.41525	0.438587	0.332688
	247.3	3.24449	4.16601	3.67588	3.69546	1.98786	1.54471	1.76628	0.636672	0.407397	0.719022	0.587697	0.888254	0.558824	0.274037	0.573705	0.134227	0.413632	0.443375	0.330411
	247.2	3.21965	4.14481	3.64303	3.66916	1.96987	1.53888	1.75438	0.631844	0.395888	0.706139	0.577957	0.922005	0.560426	0.263633	0.582021	0.123989	0.414473	0.433838	0.3241
	247.1	3.19176	4.134	3.61548	3.64708	1.95077	1.52902	1.73989	0.61915	0.40117	0.695011	0.571777	0.946153	0.542035	0.255051	0.58108	0.11215	0.438911	0.418527	0.323196
	247	3.17854	4.14061	3.58536	3.63484	1.93863	1.51353	1.72608	0.597942	0.415265	0.680771	0.564659	0.972665	0.52063	0.253218	0.582171	0.098082	0.455112	0.405996	0.31973
	246.9	3.17027	4.14014	3.5617	3.62404	1.922	1.5069	1.71445	0.577968	0.413974	0.664556	0.552166	0.979633	0.507846	0.259421	0.5823	0.0777664	0.446477	0.395025	0.306423
	246.8	3.15776	4.12966	3.53953	3.60898	1.89421	1.49069	1.69245	0.568961	0.417262	0.646126	0.544116	0.967271	0.487024	0.274436	0.576244	0.0689168	0.432669	0.380717	0.294101
	246.7	3.1458	4.11173	3.5256	3.59438	1.86107	1.474	1.66753	0.55393	0.41283	0.636164	0.534308	0.959837	0.463692	0.277021	0.56685	0.0517222	0.416994	0.365456	0.278057
	246.6	3.12819	4.08953	3.51498	3.57757	1.82355	1.45701	1.64028	0.538316	0.406514	0.630911	0.525247	0.931361	0.449059	0.268777	0.549732	0.0337026	0.401776	0.340472	0.25865
	246.5	3.10322	4.06895	3.50401	3.55873	1.78183	1.4503	1.61606	0.524669	0.400879	0.622139	0.515896	0.907214	0.444025	0.255575	0.535605	0.0128148	0.387173	0.324013	0.241334
	246.4	3.08726	4.0536	3.49337	3.54474	1.74654	1.44013	1.59333	0.514488	0.405345	0.596662	0.505498	0.887967	0.454163	0.248584	0.530238	-0.000352989	0.360722	0.305968	0.222112
	246.3	3.08411	4.03832	3.4894	3.53728	1.72402	1.42336	1.57369	0.494984	0.394086	0.570684	0.486585	0.847021	0.443987	0.238063	0.50969	-0.0130386	0.318837	0.285667	0.197155
	246.2	3.06527	4.01675	3.46936	3.51713	1.69966	1.39883	1.54924	0.469218	0.383165	0.550899	0.467761	0.808542	0.416238	0.226201	0.48366	-0.0264348	0.274028	0.26814	0.171911
	246.1	3.03866	3.99892	3.44158	3.49305	1.68136	1.37565	1.52851	0.464159	0.380824	0.533518	0.4595	0.778549	0.390041	0.208425	0.459005	-0.0400543	0.227415	0.258755	0.148705
	246	3.01125	3.9714	3.4207	3.46778	1.66532	1.35842	1.51187	0.454257	0.380014	0.516665	0.450312	0.74453	0.378369	0.179952	0.434284	-0.0519821	0.196904	0.253827	0.132916
	245.9	2.98187	3.95372	3.39001	3.44187	1.64094	1.34379	1.49236	0.446231	0.385719	0.497424	0.443125	0.711412	0.3576	0.1484	0.405804	-0.071524	0.177992	0.243675	0.116714
	245.8	2.9544	3.94377	3.37452	3.42423	1.61162	1.33607	1.47385	0.440981	0.373282	0.472859	0.429041	0.678271	0.339597	0.124708	0.380859	-0.0831752	0.160939	0.225865	0.10121
	245.7	2.92537	3.93563	3.35717	3.40606	1.58418	1.31644	1.45031	0.432504	0.361954	0.454586	0.416348	0.657088	0.319321	0.104749	0.360386	-0.0974314	0.14818	0.209553	0.0867672
	245.6	2.89904	3.92577	3.33397	3.38626	1.55535	1.29494	1.42515	0.42751	0.34223	0.435729	0.401823	0.631931	0.313022	0.0848709	0.343275	-0.108767	0.157664	0.198221	0.0823727
	245.5	2.86653	3.91198	3.31355	3.36402	1.52596	1.27414	1.40005	0.410817	0.323662	0.420754	0.385078	0.61485	0.305278	0.0722982	0.330809	-0.122282	0.176331	0.177049	0.0770327
	245.4	2.83758	3.89846	3.27612	3.33739	1.50185	1.25389	1.37787	0.381328	0.297165	0.405151	0.361215	0.599203	0.303203	0.0550415	0.319149	-0.137367	0.18943	0.161514	0.0711923
	245.3	2.81409	3.88336	3.23521	3.31089	1.48295	1.23836	1.36065	0.366196	0.270628	0.387168	0.341331	0.579034	0.299727	0.0514399	0.310067	-0.158219	0.194469	0.155648	0.063966
	245.2	2.79728	3.8723	3.19738	3.28899	1.45872	1.22678	1.34275	0.354771	0.251305	0.358331	0.321469	0.567543	0.282701	0.052654	0.300966	-0.168602	0.183932	0.143694	0.053008
	245.1	2.78108	3.84906	3.15967	3.26327	1.43247	1.22193	1.3272	0.342023	0.232584	0.333752	0.302786	0.572479	0.262408	0.050648	0.295178	-0.177416	0.171886	0.126587	0.0403523
	245	2.75426	3.81823	3.12888	3.23379	1.41055	1.21078	1.31066	0.323917	0.22598	0.312889	0.287595	0.574576	0.248685	0.0336136	0.285625	-0.187451	0.145308	0.108275	0.022044
	244.9	2.72845	3.78373	3.09945	3.20388	1.39695	1.19618	1.29656	0.302354	0.22878	0.290043	0.273726	0.564964	0.235344	0.0164113	0.27224	-0.201271	0.112994	0.0808034	-0.0024912
	244.8	2.70267	3.74193	3.05941	3.168	1.36965	1.17669	1.27317	0.276793	0.230574	0.274554	0.26064	0.541858	0.229642	0.000637308	0.257379	-0.20746	0.0907013	0.0488449	-0.0226379
	244.7	2.66974	3.69507	3.01599	3.12693	1.33585	1.15493	1.24539	0.248888	0.213145	0.255506	0.23918	0.504597	0.220103	-0.0222239	0.234159	-0.21716	0.063237	0.0217316	-0.0440638
	244.6	2.63651	3.64487	2.97455	3.08531	1.30423	1.12803	1.21613	0.232364	0.200488	0.240875	0.224576	0.454506	0.203108	-0.0546026	0.201004	-0.227054	0.0322357	-0.000267536	-0.0650286
	244.5	2.5956	3.59258	2.93456	3.04091	1.27523	1.10596	1.1906	0.208572	0.178587	0.224508	0.203889	0.418874	0.195323	-0.0853846	0.176271	-0.24183	-0.00286865	-0.0307327	-0.0918104
	244.4	2.56689	3.54924	2.88317	2.99977	1.24326	1.08533	1.1643	0.187306	0.151767	0.198023	0.179032	0.403909	0.200687	-0.115059	0.163179	-0.259086	-0.0325714	-0.0634481	-0.118368
	244.3	2.53755	3.50321	2.8377	2.95949	1.20285	1.05903	1.13094	0.17481	0.113634	0.171841	0.153428	0.377904	0.209976	-0.144814	0.147689	-0.273827	-0.0557877	-0.0847804	-0.138132
	244.2	2.4949	3.45219	2.80061	2.9159	1.178	1.0345	1.10625	0.169708	0.0764099	0.144146	0.130088	0.344164	0.189232	-0.179168	0.118076	-0.289221	-0.0624039	-0.113095	-0.154907
	244.1	2.45311	3.41757	2.7704	2.88036	1.15606	1.0081	1.08208	0.16437	0.0347198	0.125165	0.108085	0.299927	0.160982	-0.20784	0.0843563	-0.30904	-0.0831085	-0.147542	-0.179897
	244	2.40282	3.38235	2.7322	2.83912	1.12178	0.974132	1.04796	0.160281	-0.00132904	0.0850113	0.0813211	0.246626	0.129469	-0.22942	0.0488917	-0.332965	-0.112025	-0.1803	-0.20843
	243.9	2.34702	3.32935	2.68248	2.78628	1.08579	0.937954	1.01187	0.140647	-0.0363007	0.0422506	0.0488656	0.180429	0.0967789	-0.251821	0.0084623	-0.346296	-0.128127	-0.201999	-0.225474
	243.8	2.30351	3.27699	2.62901	2.7365	1.05902	0.906494	0.982757	0.118951	-0.0684311	-0.00155792	0.0163207	0.112849	0.085527	-0.273344	-0.0249893	-0.351376	-0.151974	-0.226691	-0.243347
	243.7	2.25557	3.21229	2.57972	2.68253	1.02512	0.875419	0.950269	0.105197	-0.120474	-0.0347509	-0.016676	0.0516373	0.0673294	-0.303869	-0.0616341	-0.359992	-0.178989	-0.253843	-0.264275
	243.6	2.20185	3.14143	2.53578	2.62635	0.989733	0.840463	0.915098	0.0887245	-0.166211	-0.0692698	-0.0489188	-0.0122284	0.0328247	-0.337248	-0.105551	-0.368582	-0.198827	-0.275294	-0.280901
	243.5	2.14431	3.0733	2.49457	2.57073	0.955932	0.810717	0.883325	0.0702499	-0.217578	-0.103188	-0.0835054	-0.0413528	0.0134659	-0.371006	-0.132964	-0.388336	-0.221115	-0.299629	-0.303027
	243.4	2.08833	3.0099	2.44722	2.51515	0.925835	0.779317	0.852576	0.0593948	-0.265486	-0.144815	-0.116969	-0.0684311	-0.00242004	-0.404352	-0.158401	-0.411285	-0.243768	-0.322965	-0.326006
	243.3	2.04119	2.95453	2.39283	2.46285	0.89536	0.744126	0.819743	0.0507118	-0.298529	-0.192759	-0.146859	-0.0721527	-0.0167847	-0.432178	-0.173705	-0.430596	-0.275858	-0.330562	-0.345672
	243.2	1.99441	2.8893	2.33067	2.40479	0.868447	0.703929	0.786188	0.0403069	-0.337352	-0.24858	-0.181875	-0.0933334	-0.0342712	-0.456189	-0.194598	-0.438543	-0.312277	-0.336225	-0.362348
	243.1	1.9414	2.82434	2.27216	2.34597	0.828349	0.656613	0.742481	0.0252251	-0.394612	-0.291424	-0.22027	-0.130762	-0.0698334	-0.480514	-0.227036	-0.455015	-0.364174	-0.356094	-0.391761
	243	1.87722	2.73233	2.21355	2.27437	0.776036	0.614489	0.695262	0.0116226	-0.443095	-0.326974	-0.252815	-0.163245	-0.105725	-0.505959	-0.25831	-0.483319	-0.398686	-0.374171	-0.418725
	242.9	1.81848	2.65474	2.15218	2.20847	0.719056	0.574493	0.646775	0.00435944	-0.487024	-0.371661	-0.284775	-0.202763	-0.119444	-0.526042	-0.28275	-0.511021	-0.424106	-0.39576	-0.443629
	242.8	1.77159	2.58809	2.10197	2.15388	0.666117	0.530009	0.598063	-0.00429917	-0.539558	-0.40562	-0.316492	-0.244485	-0.125925	-0.548733	-0.306381	-0.539901	-0.433879	-0.42311	-0.46563
	242.7	1.71669	2.52598	2.03571	2.09279	0.614098	0.476747	0.545423	-0.0202438	-0.604829	-0.440992	-0.355355	-0.302467	-0.144695	-0.566002	-0.337721	-0.567708	-0.44324	-0.460831	-0.490593
	242.6	1.66126	2.4678	1.96739	2.03215	0.563487	0.418261	0.490874	-0.0496841	-0.677249	-0.468982	-0.398638	-0.341135	-0.167711	-0.578877	-0.362574	-0.596894	-0.48727	-0.492511	-0.525558
	242.5	1.60624	2.40274	1.89652	1.9685	0.52144	0.351632	0.436536	-0.0833023	-0.73979	-0.502383	-0.441825	-0.377533	-0.178346	-0.603623	-0.386501	-0.625667	-0.520927	-0.518025	-0.554873
	242.4	1.55968	2.3437	1.81613	1.9065	0.48607	0.29253	0.3893	-0.118752	-0.799864	-0.546413	-0.488343	-0.427736	-0.171895	-0.627503	-0.409045	-0.663138	-0.555006	-0.544484	-0.587543
	242.3	1.51287	2.28519	1.74236	1.84681	0.445789	0.242447	0.344118	-0.152525	-0.845486	-0.59405	-0.530687	-0.482343	-0.185851	-0.65082	-0.439671	-0.704561	-0.600832	-0.58124	-0.628878
	242.2	1.46469	2.22064	1.65952	1.78162	0.399125	0.184624	0.291875	-0.191708	-0.878175	-0.641683	-0.570522	-0.550258	-0.220351	-0.682344	-0.484318	-0.748742	-0.650366	-0.619536	-0.672881
	242.1	1.41125	2.13845	1.57801	1.70924	0.344641	0.140715	0.242678	-0.222838	-0.898798	-0.69237	-0.604669	-0.613638	-0.259729	-0.706724	-0.526697	-0.785983	-0.696136	-0.665833	-0.715984
	242	1.34681	2.03206	1.5078	1.62889	0.287234	0.0832082	0.185221	-0.250161	-0.922289	-0.749914	-0.640788	-0.668159	-0.305573	-0.735977	-0.569903	-0.818732	-0.731796	-0.717065	-0.755864
	241.9	1.27895	1.93083	1.44341	1.55106	0.232899	0.0184535	0.125676	-0.277192	-0.949289	-0.797032	-0.674504	-0.705914	-0.355051	-0.770069	-0.610345	-0.841832	-0.774733	-0.764947	-0.793837
	241.8	1.19691	1.83341	1.3765	1.46894	0.18194	-0.0557434	0.0630983	-0.307684	-0.98519	-0.834662	-0.709179	-0.758517	-0.409923	-0.813754	-0.660731	-0.875064	-0.826392	-0.806491	-0.835982
	241.7	1.1147	1.75132	1.31249	1.39284	0.108198	-0.140548	-0.016175	-0.336879	-1.02956	-0.875045	-0.747161	-0.828401	-0.47112	-0.866317	-0.721946	-0.911486	-0.868295	-0.849976	-0.876586
	241.6	1.02996	1.6658	1.23804	1.31127	0.0307098	-0.223609	-0.0964496	-0.356896	-1.08804	-0.921216	-0.788717	-0.89507	-0.51842	-0.914521	-0.776004	-0.935829	-0.901076	-0.88556	-0.907488
	241.5	0.948689	1.58824	1.1782	1.23838	-0.0444382	-0.291252	-0.167845	-0.386095	-1.14878	-0.97136	-0.835412	-0.93793	-0.573784	-0.974773	-0.828829	-0.963054	-0.92625	-0.921334	-0.936879
	241.4	0.872235	1.51381	1.13286	1.17297	-0.115521	-0.355377	-0.235449	-0.435565	-1.19214	-1.02738	-0.885028	-0.983949	-0.628064	-1.02954	-0.880518	-1.00177	-0.955469	-0.954477	-0.970572
	241.3	0.801115	1.44879	1.07801	1.1093	-0.185661	-0.403601	-0.294631	-0.486677	-1.24523	-1.08228	-0.938062	-1.00189	-0.683296	-1.06947	-0.918219	-1.04936	-0.980937	-0.983147	-1.00448
	241.2	0.72518	1.38692	1.00796	1.04002	-0.260688	-0.455252	-0.35797	-0.550487	-1.30562	-1.14601	-1.00071	-1.02124	-0.748941	-1.10787	-0.95935	-1.0959	-1.02378	-0.996849	-1.03884
	241.1	0.646428	1.3149	0.937434	0.966254	-0.334685	-0.517881	-0.426283	-0.606796	-1.35462	-1.2049	-1.05544	-1.06762	-0.83338	-1.15012	-1.01704	-1.13573	-1.07103	-1.02527	-1.07734
	241	0.56565	1.23444	0.862138	0.887409	-0.417833	-0.580247	-0.49904	-0.655157	-1.39236	-1.25649	-1.10134	-1.11554	-0.925487	-1.20056	-1.08053	-1.17821	-1.13747	-1.06312	-1.12627
	240.9	0.48145	1.15365	0.767972	0.801024	-0.495972	-0.644776	-0.570374	-0.699105	-1.44629	-1.31212	-1.1525	-1.14888	-1.00082	-1.24672	-1.13214	-1.22452	-1.21787	-1.09975	-1.18071
	240.8	0.388429	1.06664	0.677605	0.710891	-0.567646	-0.722253	-0.64495	-0.763692	-1.5075	-1.36826	-1.21315	-1.18152	-1.05358	-1.28884	-1.17465	-1.26288	-1.29765	-1.12367	-1.22807
	240.7	0.287369	0.984169	0.598203	0.623247	-0.63527	-0.804196	-0.719733	-0.81865	-1.56211	-1.43064	-1.27047	-1.23337	-1.09747	-1.34236	-1.2244	-1.30315	-1.35924	-1.15697	-1.27312
	240.6	0.201293	0.904728	0.523798	0.543273	-0.708294	-0.877872	-0.793083	-0.887348	-1.6043	-1.48646	-1.32604	-1.28974	-1.14723	-1.40076	-1.27924	-1.34316	-1.42111	-1.19833	-1.32087
	240.5	0.129659	0.830861	0.452213	0.470911	-0.778336	-0.953125	-0.86573	-0.954768	-1.67344	-1.54195	-1.39005	-1.36052	-1.20384	-1.46582	-1.34339	-1.39106	-1.49476	-1.24196	-1.37593
	240.4	0.0393112	0.750607	0.378039	0.389319	-0.841602	-1.02736	-0.934481	-1.01975	-1.73265	-1.60162	-1.45134	-1.42696	-1.26805	-1.5249	-1.40664	-1.43769	-1.56599	-1.29279	-1.43216
	240.3	-0.0488337	0.663892	0.292165	0.302408	-0.91049	-1.1133	-1.01189	-1.07422	-1.785	-1.6619	-1.50704	-1.48868	-1.32603	-1.57691	-1.46387	-1.49192	-1.62828	-1.35027	-1.49016
	240.2	-0.131452	0.573967	0.2055	0.216005	-0.984863	-1.2101	-1.09748	-1.12243	-1.8445	-1.72201	-1.56298	-1.56292	-1.40155	-1.63302	-1.5325	-1.54438	-1.69366	-1.41409	-1.55071
	240.1	-0.227953	0.490421	0.110543	0.124337	-1.05867	-1.30409	-1.18138	-1.17781	-1.90541	-1.78591	-1.62304	-1.65346	-1.47713	-1.69995	-1.61018	-1.59787	-1.74871	-1.48011	-1.6089
	240	-0.336357	0.407029	0.025885	0.0321857	-1.13838	-1.39512	-1.26675	-1.24003	-1.97002	-1.84493	-1.68499	-1.73088	-1.54117	-1.7632	-1.67842	-1.64342	-1.80127	-1.54116	-1.66195
	239.9	-0.454885	0.322945	-0.0497971	-0.060579	-1.22053	-1.49551	-1.35802	-1.30057	-2.04969	-1.89096	-1.74707	-1.78581	-1.61062	-1.82497	-1.74047	-1.69691	-1.86036	-1.60784	-1.7217
	239.8	-0.57801	0.238649	-0.129226	-0.156196	-1.30466	-1.59932	-1.45199	-1.36335	-2.10782	-1.94685	-1.80601	-1.84287	-1.68477	-1.88535	-1.80433	-1.75187	-1.88944	-1.67394	-1.77175
	239.7	-0.707035	0.172115	-0.223927	-0.252949	-1.38636	-1.69974	-1.54305	-1.43374	-2.17022	-2.01145	-1.8718	-1.91577	-1.74207	-1.94652	-1.86812	-1.79988	-1.91264	-1.72281	-1.81178
	239.6	-0.842213	0.0906143	-0.317495	-0.356365	-1.46513	-1.80643	-1.63578	-1.49062	-2.23668	-2.07082	-1.93271	-1.9928	-1.7995	-2.01678	-1.93636	-1.8492	-1.93862	-1.77083	-1.85288
	239.5	-0.978557	-0.00429077	-0.427518	-0.470122	-1.53706	-1.90597	-1.72152	-1.54242	-2.30236	-2.13905	-1.99461	-2.07451	-1.85744	-2.09214	-2.00803	-1.90144	-1.96845	-1.82769	-1.89919
	239.4	-1.11956	-0.109663	-0.534075	-0.587766	-1.62687	-2.00681	-1.81684	-1.59522	-2.37689	-2.21702	-2.06304	-2.15814	-1.91291	-2.17165	-2.0809	-1.95785	-2.0247	-1.88586	-1.95614
	239.3	-1.2501	-0.216793	-0.633396	-0.700096	-1.71042	-2.11177	-1.91109	-1.63614	-2.44421	-2.29974	-2.1267	-2.24546	-1.97859	-2.25784	-2.16063	-2.00816	-2.07023	-1.94927	-2.00922
	239.2	-1.38067	-0.339214	-0.72069	-0.813525	-1.79963	-2.20942	-2.00453	-1.68218	-2.49686	-2.38133	-2.18679	-2.332	-2.05802	-2.33037	-2.24013	-2.0636	-2.11268	-2.01422	-2.0635
	239.1	-1.50816	-0.464912	-0.804639	-0.925904	-1.90142	-2.30897	-2.1052	-1.72531	-2.53939	-2.46227	-2.24232	-2.39939	-2.16408	-2.4089	-2.32412	-2.11982	-2.16399	-2.07075	-2.11819
	239	-1.63515	-0.600223	-0.906478	-1.04728	-2.00537	-2.41771	-2.21154	-1.76512	-2.59312	-2.53277	-2.297	-2.46681	-2.24004	-2.49343	-2.40009	-2.16627	-2.21366	-2.11918	-2.16637
	238.9	-1.75024	-0.733359	-1.00819	-1.16393	-2.10332	-2.51816	-2.31074	-1.81443	-2.66371	-2.60052	-2.35955	-2.54592	-2.3054	-2.57805	-2.47646	-2.21388	-2.26274	-2.16064	-2.21242
	238.8	-1.86975	-0.853828	-1.11509	-1.27956	-2.2028	-2.62219	-2.41249	-1.88018	-2.74843	-2.66915	-2.43259	-2.62608	-2.37444	-2.66232	-2.55428	-2.26399	-2.32705	-2.20949	-2.26684
	238.7	-1.99569	-0.957205	-1.2253	-1.39273	-2.29076	-2.73728	-2.51402	-1.93997	-2.82963	-2.74503	-2.50488	-2.71492	-2.45657	-2.75353	-2.64167	-2.3113	-2.39257	-2.26722	-2.3237
	238.6	-2.13063	-1.06099	-1.34372	-1.51178	-2.3872	-2.84222	-2.61471	-2.017	-2.90584	-2.82338	-2.58207	-2.81029	-2.54247	-2.84985	-2.7342	-2.3685	-2.45511	-2.32841	-2.38401
	238.5	-2.25419	-1.1553	-1.47147	-1.62699	-2.48013	-2.94466	-2.71239	-2.0934	-3.00026	-2.90461	-2.66609	-2.91333	-2.62707	-2.94088	-2.82709	-2.43434	-2.4981	-2.38888	-2.44044
	238.4	-2.37727	-1.27261	-1.60361	-1.75116	-2.56758	-3.05064	-2.80911	-2.16267	-3.10441	-2.9851	-2.75073	-3.01317	-2.69696	-3.0148	-2.90831	-2.5002	-2.54353	-2.45617	-2.49997
	238.3	-2.51012	-1.37742	-1.73043	-1.87266	-2.65009	-3.15055	-2.90032	-2.23182	-3.18995	-3.06269	-2.82815	-3.11761	-2.76124	-3.08649	-2.98845	-2.57356	-2.5926	-2.52415	-2.56344
	238.2	-2.64653	-1.47976	-1.86853	-1.99827	-2.73626	-3.26334	-2.9998	-2.2929	-3.27006	-3.1499	-2.90429	-3.2104	-2.83993	-3.1558	-3.06871	-2.6525	-2.64779	-2.58583	-2.62871
	238.1	-2.78531	-1.59486	-2.01668	-2.13228	-2.82705	-3.38996	-3.10851	-2.32575	-3.34364	-3.23419	-2.96786	-3.27998	-2.91685	-3.21944	-3.13876	-2.72778	-2.71228	-2.64892	-2.69633
	238	-2.91935	-1.7203	-2.17443	-2.27136	-2.92112	-3.52042	-3.22077	-2.36298	-3.41957	-3.31776	-3.03344	-3.35296	-3.00455	-3.27995	-3.21249	-2.80346	-2.76741	-2.7273	-2.76606
	237.9	-3.04674	-1.86261	-2.31967	-2.40967	-3.0188	-3.64495	-3.33188	-2.40147	-3.49785	-3.40222	-3.10051	-3.44527	-3.09861	-3.35015	-3.29801	-2.86674	-2.79259	-2.80996	-2.8231
	237.8	-3.17106	-1.99912	-2.45855	-2.54291	-3.11995	-3.75642	-3.43818	-2.45196	-3.58554	-3.4836	-3.1737	-3.53603	-3.17462	-3.42769	-3.37945	-2.92805	-2.81646	-2.88332	-2.87594
	237.7	-3.30847	-2.1435	-2.59301	-2.68166	-3.21024	-3.87405	-3.54215	-2.52496	-3.67727	-3.5657	-3.25598	-3.62138	-3.24838	-3.51047	-3.46008	-2.99146	-2.8371	-2.95404	-2.92753
	237.6	-3.44917	-2.2897	-2.71586	-2.81824	-3.30475	-3.99	-3.64738	-2.59889	-3.74689	-3.6594	-3.33506	-3.71414	-3.32152	-3.59769	-3.54445	-3.05121	-2.85886	-3.01873	-2.97627
	237.5	-3.58631	-2.4373	-2.84177	-2.95513	-3.4231	-4.09558	-3.75934	-2.65541	-3.80946	-3.75816	-3.40768	-3.80427	-3.40035	-3.69888	-3.6345	-3.11037	-2.88488	-3.09282	-3.02936
	237.4	-3.727	-2.58068	-2.97355	-3.09374	-3.55152	-4.2024	-3.87696	-2.71697	-3.89871	-3.84999	-3.48856	-3.90634	-3.49171	-3.79422	-3.73076	-3.17028	-2.92404	-3.17426	-3.08953
	237.3	-3.87403	-2.71531	-3.11056	-3.2333	-3.66779	-4.31057	-3.98918	-2.77572	-4.00632	-3.93752	-3.57319	-4.00505	-3.57603	-3.88058	-3.82055	-3.2338	-2.99323	-3.26297	-3.16333
	237.2	-4.02369	-2.84686	-3.23775	-3.36943	-3.77051	-4.43324	-4.10187	-2.8316	-4.11427	-4.02371	-3.65653	-4.08704	-3.68231	-3.96238	-3.91058	-3.31782	-3.07172	-3.34966	-3.2464
	237.1	-4.17458	-2.9798	-3.36927	-3.50788	-3.88374	-4.56928	-4.22651	-2.89265	-4.22975	-4.12702	-3.74981	-4.17287	-3.76771	-4.0454	-3.99533	-3.39986	-3.15277	-3.42072	-3.32445
	237	-4.32988	-3.10912	-3.50489	-3.64796	-3.99493	-4.70548	-4.3502	-2.95906	-4.33215	-4.228	-3.83974	-4.26949	-3.83913	-4.13398	-4.08087	-3.48066	-3.24215	-3.49477	-3.40586
	236.9	-4.49374	-3.22731	-3.64199	-3.78768	-4.10225	-4.82517	-4.46371	-3.0364	-4.42567	-4.32299	-3.92835	-4.37247	-3.90827	-4.23013	-4.17029	-3.55828	-3.31053	-3.55486	-3.47456
	236.8	-4.65823	-3.34866	-3.78041	-3.9291	-4.21839	-4.93463	-4.57651	-3.11767	-4.51893	-4.41788	-4.01816	-4.4602	-3.98641	-4.31538	-4.254	-3.62319	-3.36524	-3.61183	-3.53342
	236.7	-4.80527	-3.48349	-3.93014	-4.07297	-4.34088	-5.05405	-4.69747	-3.18641	-4.61858	-4.52585	-4.11028	-4.53875	-4.06963	-4.39423	-4.3342	-3.68605	-3.4318	-3.66592	-3.59459
	236.6	-4.94997	-3.61336	-4.10212	-4.22182	-4.47125	-5.17141	-4.82133	-3.25493	-4.70334	-4.63924	-4.19917	-4.63033	-4.13882	-4.48243	-4.41719	-3.75287	-3.49393	-3.72529	-3.65736
	236.5	-5.09648	-3.74997	-4.27423	-4.37356	-4.59915	-5.28609	-4.94262	-3.32506	-4.78465	-4.73599	-4.2819	-4.7245	-4.21717	-4.59058	-4.51075	-3.82165	-3.57941	-3.78702	-3.72936
	236.4	-5.24372	-3.90708	-4.44601	-4.53227	-4.71008	-5.40518	-5.05763	-3.40192	-4.86636	-4.82669	-4.36499	-4.79789	-4.30673	-4.71119	-4.60527	-3.88373	-3.66882	-3.8491	-3.80055
	236.3	-5.37562	-4.05721	-4.60962	-4.68082	-4.81729	-5.51582	-5.16655	-3.47231	-4.94676	-4.91373	-4.44427	-4.88444	-4.41025	-4.82035	-4.70501	-3.94371	-3.76241	-3.93222	-3.87945
	236.2	-5.51646	-4.21558	-4.77151	-4.83452	-4.93816	-5.62937	-5.28376	-3.56487	-5.05683	-5.01785	-4.54652	-4.9748	-4.52117	-4.91276	-4.80291	-4.01268	-3.85804	-4.0181	-3.96294
	236.1	-5.65464	-4.37345	-4.92698	-4.98502	-5.04813	-5.7418	-5.39496	-3.65828	-5.15007	-5.12654	-4.64496	-5.06402	-4.64783	-5.0072	-4.90635	-4.08319	-3.94414	-4.09773	-4.04169
	236	-5.78407	-4.54411	-5.08785	-5.13868	-5.15945	-5.85384	-5.50664	-3.75189	-5.22767	-5.2448	-4.74145	-5.15577	-4.7502	-5.09791	-5.00129	-4.16541	-4.02026	-4.16868	-4.11812
	235.9	-5.91804	-4.71161	-5.26311	-5.29759	-5.2706	-5.97547	-5.62303	-3.84415	-5.30388	-5.37044	-4.83949	-5.2479	-4.87299	-5.19727	-5.10605	-4.24706	-4.101	-4.23144	-4.19317
	235.8	-6.04904	-4.85669	-5.44967	-5.4518	-5.39227	-6.10885	-5.75056	-3.91984	-5.4017	-5.482	-4.93451	-5.36897	-4.96039	-5.29753	-5.20896	-4.32533	-4.15933	-4.31373	-4.26613
	235.7	-6.18685	-4.98314	-5.62377	-5.59792	-5.51009	-6.24774	-5.87892	-4.00211	-5.48377	-5.60334	-5.02974	-5.49174	-5.05595	-5.39075	-5.31281	-4.40154	-4.21769	-4.40457	-4.34127
	235.6	-6.34525	-5.122	-5.79189	-5.75305	-5.62015	-6.39072	-6.00544	-4.08242	-5.57582	-5.72362	-5.12729	-5.60088	-5.1534	-5.48199	-5.41209	-4.47004	-4.29749	-4.4992	-4.42224
	235.5	-6.51301	-5.27728	-5.9557	-5.91533	-5.7307	-6.54769	-6.13919	-4.14844	-5.67782	-5.84291	-5.22306	-5.70273	-5.25876	-5.57445	-5.51198	-4.54346	-4.36957	-4.58653	-4.49985
	235.4	-6.6797	-5.43432	-6.11805	-6.07736	-5.84271	-6.68714	-6.26492	-4.22059	-5.78769	-5.96108	-5.32312	-5.81192	-5.35379	-5.67268	-5.6128	-4.62338	-4.44004	-4.66174	-4.57505
	235.3	-6.83455	-5.60664	-6.27885	-6.24001	-5.9696	-6.82191	-6.39575	-4.29619	-5.90728	-6.0714	-5.42496	-5.92195	-5.44668	-5.76998	-5.71287	-4.70216	-4.53405	-4.73681	-4.65767
	235.2	-7.01449	-5.78737	-6.42477	-6.40888	-6.10089	-6.95676	-6.52882	-4.36596	-6.01589	-6.18764	-5.52316	-6.04262	-5.52897	-5.86468	-5.81209	-4.79156	-4.63766	-4.8147	-4.74797
	235.1	-7.20639	-5.97021	-6.5699	-6.58217	-6.24162	-7.10296	-6.67229	-4.44852	-6.11691	-6.30059	-5.62201	-6.1397	-5.59776	-5.95578	-5.89775	-4.88199	-4.7242	-4.89598	-4.83406
	235	-7.37948	-6.1536	-6.71463	-6.74924	-6.3786	-7.25678	-6.81769	-4.52946	-6.22699	-6.41167	-5.72271	-6.21911	-5.68218	-6.04419	-5.98183	-4.97086	-4.81336	-4.97741	-4.92054
	234.9	-7.54156	-6.32776	-6.86359	-6.91097	-6.51839	-7.40662	-6.96251	-4.61245	-6.34413	-6.51802	-5.82487	-6.30607	-5.76186	-6.14469	-6.07087	-5.05265	-4.9114	-5.072	-5.01202
	234.8	-7.71025	-6.49597	-7.01017	-7.07213	-6.66422	-7.5417	-7.10296	-4.70277	-6.48278	-6.62607	-5.93721	-6.43089	-5.8536	-6.24931	-6.17793	-5.12952	-5.02145	-5.18072	-5.11056
	234.7	-7.8839	-6.65017	-7.15875	-7.23094	-6.79324	-7.67804	-7.23564	-4.80602	-6.62067	-6.7383	-6.055	-6.55377	-5.95672	-6.37288	-6.29446	-5.20333	-5.13618	-5.27965	-5.20639
	234.6	-8.06154	-6.81375	-7.29819	-7.39116	-6.91434	-7.8223	-7.36832	-4.90635	-6.74626	-6.85292	-6.16851	-6.67025	-6.05239	-6.48904	-6.40389	-5.29317	-5.26914	-5.3752	-5.3125
	234.5	-8.23605	-6.98107	-7.44453	-7.55388	-7.0285	-7.97783	-7.50317	-4.9987	-6.84958	-6.96212	-6.27013	-6.77824	-6.15208	-6.59494	-6.50842	-5.38244	-5.39368	-5.47674	-5.41762
	234.4	-8.4049	-7.13452	-7.5915	-7.71031	-7.14687	-8.12722	-7.63704	-5.08518	-6.96236	-7.08007	-6.37587	-6.88365	-6.2551	-6.69721	-6.61199	-5.46796	-5.52257	-5.57428	-5.5216
	234.3	-8.56491	-7.28288	-7.76022	-7.86934	-7.26887	-8.27175	-7.77031	-5.17034	-7.0925	-7.19716	-6.48667	-7.00685	-6.34901	-6.79975	-6.71854	-5.55925	-5.64215	-5.66393	-5.62178
	234.2	-8.73069	-7.41439	-7.94396	-8.02968	-7.3879	-8.42249	-7.90519	-5.26887	-7.20164	-7.31348	-6.59466	-7.13564	-6.46104	-6.90109	-6.83259	-5.66624	-5.75887	-5.76361	-5.72957
	234.1	-8.88286	-7.55857	-8.12112	-8.18752	-7.51221	-8.57082	-8.04152	-5.3678	-7.32127	-7.44086	-6.70998	-7.24431	-6.55694	-7.00104	-6.9341	-5.77602	-5.87809	-5.86534	-5.83982
	234	-9.03611	-7.72822	-8.29189	-8.35207	-7.63913	-8.72177	-8.18045	-5.47686	-7.43418	-7.57316	-6.82807	-7.34027	-6.64395	-7.11291	-7.03238	-5.88765	-5.98298	-5.96074	-5.94379
	233.9	-9.19506	-7.90455	-8.45874	-8.51945	-7.78494	-8.8621	-8.32352	-5.58665	-7.53004	-7.70803	-6.94157	-7.43983	-6.73611	-7.22171	-7.13255	-5.98701	-6.0888	-6.05039	-6.04207
	233.8	-9.36116	-8.09535	-8.62716	-8.69456	-7.92484	-9.00347	-8.46415	-5.68196	-7.63473	-7.83358	-7.05009	-7.53878	-6.84722	-7.33648	-7.24083	-6.07798	-6.17949	-6.14497	-6.13415
	233.7	-9.52323	-8.28838	-8.80226	-8.87129	-8.0649	-9.14384	-8.60437	-5.77835	-7.74369	-7.93945	-7.15383	-7.65621	-6.97409	-7.43861	-7.3563	-6.16781	-6.28543	-6.23702	-6.23009
	233.6	-9.69153	-8.48406	-8.97528	-9.05029	-8.20506	-9.27555	-8.7403	-5.86794	-7.85537	-8.05328	-7.25886	-7.78029	-7.06988	-7.54904	-7.4664	-6.25869	-6.39229	-6.33023	-6.32707
	233.5	-9.85248	-8.6848	-9.1475	-9.22826	-8.35264	-9.42636	-8.8895	-5.95614	-7.9757	-8.17704	-7.36963	-7.88364	-7.15773	-7.67101	-7.57079	-6.34656	-6.48044	-6.43782	-6.42161
	233.4	-10.0211	-8.88271	-9.30794	-9.40392	-8.49922	-9.58214	-9.04068	-6.062	-8.10253	-8.30057	-7.48837	-7.98566	-7.25598	-7.79513	-7.67892	-6.44045	-6.58338	-6.54695	-6.52359
	233.3	-10.1923	-9.08305	-9.45789	-9.57775	-8.64074	-9.72555	-9.18314	-6.16511	-8.23063	-8.42357	-7.60644	-8.10217	-7.37683	-7.92435	-7.80112	-6.54219	-6.69876	-6.6634	-6.63478
	233.2	-10.3598	-9.27692	-9.60536	-9.74736	-8.78042	-9.87751	-9.32897	-6.2725	-8.36187	-8.55191	-7.72876	-8.21409	-7.49654	-8.0345	-7.91504	-6.64384	-6.78688	-6.77735	-6.73602
	233.1	-10.5308	-9.45848	-9.77068	-9.91999	-8.93082	-10.0196	-9.47521	-6.3566	-8.48224	-8.6893	-7.84271	-8.33344	-7.59275	-8.14155	-8.02258	-6.74602	-6.8818	-6.89715	-6.84166
	233	-10.709	-9.62801	-9.93732	-10.0914	-9.08842	-10.1694	-9.62891	-6.44802	-8.61787	-8.83004	-7.96531	-8.46882	-7.7077	-8.24475	-8.14042	-6.87167	-6.99784	-7.0128	-6.96077
	232.9	-10.8831	-9.80009	-10.102	-10.2617	-9.23875	-10.3352	-9.78697	-6.54459	-8.74547	-8.96266	-8.08424	-8.62502	-7.83076	-8.36874	-8.27484	-6.98186	-7.0909	-7.10875	-7.0605
	232.8	-11.0551	-9.97056	-10.2728	-10.4328	-9.38783	-10.5088	-9.94832	-6.63754	-8.86073	-9.0828	-8.19369	-8.77906	-7.94334	-8.50147	-8.40796	-7.07803	-7.18861	-7.19675	-7.15446
	232.7	-11.2235	-10.1287	-10.4318	-10.5947	-9.53503	-10.6739	-10.1045	-6.73834	-8.98389	-9.19986	-8.30736	-8.8984	-8.05678	-8.62057	-8.52525	-7.17093	-7.29652	-7.29903	-7.25549
	232.6	-11.3947	-10.2772	-10.5744	-10.7488	-9.68823	-10.8406	-10.2644	-6.84532	-9.12672	-9.32083	-8.43096	-9.00873	-8.16056	-8.71648	-8.62859	-7.26889	-7.37943	-7.41565	-7.35466
	232.5	-11.5688	-10.4329	-10.7084	-10.9034	-9.83604	-10.9976	-10.4168	-6.94336	-9.29348	-9.44778	-8.56154	-9.11191	-8.2779	-8.82402	-8.73794	-7.37	-7.47253	-7.54038	-7.46097
	232.4	-11.7566	-10.6249	-10.8311	-11.0709	-9.97286	-11.1561	-10.5645	-7.04319	-9.46592	-9.5701	-8.69307	-9.19951	-8.42243	-8.9344	-8.85211	-7.47023	-7.57887	-7.6524	-7.56717
	232.3	-11.9421	-10.8117	-10.969	-11.2409	-10.1161	-11.3068	-10.7114	-7.14116	-9.61284	-9.69952	-8.81784	-9.30188	-8.55691	-9.04994	-8.96958	-7.58591	-7.67961	-7.776	-7.68051
	232.2	-12.1112	-10.9702	-11.1086	-11.3967	-10.26	-11.4509	-10.8555	-7.2378	-9.74565	-9.83364	-8.93903	-9.4106	-8.67192	-9.16901	-9.08384	-7.70065	-7.78426	-7.88057	-7.78849
	232.1	-12.2762	-11.1406	-11.2447	-11.5538	-10.4266	-11.6037	-11.0152	-7.32721	-9.8618	-9.96779	-9.05227	-9.50451	-8.79165	-9.27829	-9.19148	-7.8026	-7.90255	-7.98327	-7.89614
	232	-12.456	-11.3019	-11.3737	-11.7105	-10.5674	-11.7688	-11.1681	-7.40767	-9.98767	-10.1104	-9.16858	-9.6118	-8.90538	-9.37821	-9.29846	-7.90182	-8.0211	-8.08877	-8.0039
	231.9	-12.6191	-11.4536	-11.5128	-11.8618	-10.69	-11.9315	-11.3107	-7.49095	-10.126	-10.2375	-9.28482	-9.71271	-9.01948	-9.48761	-9.4066	-7.99326	-8.11211	-8.20769	-8.10435
	231.8	-12.7572	-11.6073	-11.6671	-12.0105	-10.8149	-12.0848	-11.4498	-7.58326	-10.2537	-10.3613	-9.39942	-9.82853	-9.15442	-9.61419	-9.53238	-8.0778	-8.21078	-8.32821	-8.2056
	231.7	-12.9115	-11.7634	-11.8277	-12.1675	-10.9352	-12.2295	-11.5823	-7.67521	-10.3642	-10.4927	-9.5107	-9.97251	-9.30018	-9.74218	-9.67162	-8.17094	-8.30942	-8.4403	-8.30689
	231.6	-13.0696	-11.933	-11.9764	-12.3263	-11.0465	-12.3738	-11.7101	-7.7776	-10.4716	-10.6315	-9.6269	-10.1002	-9.45133	-9.85648	-9.80267	-8.26927	-8.42527	-8.54235	-8.4123
	231.5	-13.22	-12.1062	-12.1292	-12.4851	-11.1502	-12.5228	-11.8365	-7.89467	-10.5613	-10.7528	-9.73626	-10.2062	-9.57907	-9.95809	-9.91445	-8.37327	-8.51541	-8.6342	-8.50763
	231.4	-13.3677	-12.273	-12.2764	-12.639	-11.2689	-12.6775	-11.9732	-7.99107	-10.6615	-10.8727	-9.84176	-10.3171	-9.70701	-10.0589	-10.0277	-8.48303	-8.5943	-8.72124	-8.59952
	231.3	-13.5229	-12.44	-12.4338	-12.7989	-11.3966	-12.8337	-12.1151	-8.08155	-10.7712	-10.999	-9.95058	-10.4021	-9.84997	-10.1648	-10.139	-8.58772	-8.68051	-8.81287	-8.6937
	231.2	-13.6741	-12.5828	-12.5823	-12.9464	-11.5191	-12.995	-12.257	-8.18197	-10.9041	-11.1149	-10.067	-10.4939	-9.9713	-10.2953	-10.2535	-8.6877	-8.77976	-8.90047	-8.78931
	231.1	-13.8219	-12.7289	-12.7346	-13.0951	-11.6508	-13.1597	-12.4053	-8.28116	-11.0497	-11.2238	-10.1849	-10.5878	-10.0881	-10.42	-10.3653	-8.79265	-8.88142	-8.99393	-8.88933
	231	-13.9684	-12.8669	-12.869	-13.2348	-11.7915	-13.3163	-12.5539	-8.37857	-11.1805	-11.3303	-10.2965	-10.6778	-10.209	-10.5389	-10.4752	-8.8936	-8.98759	-9.10529	-8.99549
	230.9	-14.1014	-13.0177	-13.0003	-13.3731	-11.93	-13.4693	-12.6997	-8.46993	-11.3114	-11.4338	-10.405	-10.7599	-10.3484	-10.6438	-10.584	-8.98264	-9.08083	-9.21724	-9.09357
	230.8	-14.2433	-13.174	-13.1305	-13.5159	-12.0605	-13.6095	-12.835	-8.557	-11.4334	-11.527	-10.5058	-10.8812	-10.4816	-10.7466	-10.7031	-9.0734	-9.17631	-9.31714	-9.18895
	230.7	-14.3863	-13.3217	-13.2773	-13.6618	-12.1898	-13.7416	-12.9657	-8.64899	-11.553	-11.6271	-10.6097	-11.0073	-10.6364	-10.84	-10.8279	-9.16259	-9.25657	-9.41498	-9.27805
	230.6	-14.5289	-13.4505	-13.4286	-13.8027	-12.3055	-13.8778	-13.0917	-8.73371	-11.6737	-11.7156	-10.7077	-11.1148	-10.7923	-10.9303	-10.9458	-9.25218	-9.31677	-9.51256	-9.3605
	230.5	-14.6686	-13.5543	-13.5912	-13.938	-12.4376	-14.0188	-13.2282	-8.82747	-11.7836	-11.8102	-10.8071	-11.2398	-10.9122	-11.0193	-11.0571	-9.33743	-9.38034	-9.61954	-9.44577
	230.4	-14.8236	-13.6425	-13.7427	-14.0696	-12.5758	-14.1338	-13.3548	-8.92251	-11.8965	-11.9159	-10.9116	-11.3522	-11.0226	-11.125	-11.1666	-9.42386	-9.45333	-9.71778	-9.53166
	230.3	-14.9542	-13.7386	-13.8873	-14.1934	-12.7068	-14.2636	-13.4852	-9.00705	-12.0262	-12.0276	-11.0203	-11.4528	-11.1618	-11.231	-11.2819	-9.50993	-9.51086	-9.81607	-9.61229
	230.2	-15.0749	-13.8546	-14.022	-14.3172	-12.8116	-14.3927	-13.6021	-9.09358	-12.1394	-12.1347	-11.1226	-11.553	-11.2826	-11.3088	-11.3815	-9.59423	-9.57997	-9.9118	-9.69533
	230.1	-15.1882	-13.9709	-14.1653	-14.4415	-12.9151	-14.5034	-13.7093	-9.17973	-12.2537	-12.2406	-11.2247	-11.681	-11.391	-11.3931	-11.4884	-9.6798	-9.64779	-9.99909	-9.77556
	230	-15.2885	-14.0824	-14.3164	-14.5624	-12.9981	-14.6349	-13.8165	-9.25306	-12.364	-12.3509	-11.3227	-11.8309	-11.4989	-11.483	-11.6043	-9.7657	-9.70034	-10.0851	-9.85038
	229.9	-15.3814	-14.1898	-14.459	-14.6767	-13.0745	-14.7671	-13.9208	-9.33996	-12.4517	-12.4742	-11.422	-11.9533	-11.628	-11.5822	-11.7212	-9.84462	-9.76747	-10.1665	-9.9262
	229.8	-15.4755	-14.2861	-14.577	-14.7795	-13.1692	-14.8925	-14.0309	-9.43641	-12.556	-12.5917	-11.528	-12.055	-11.7745	-11.6755	-11.835	-9.94074	-9.8601	-10.2532	-10.018
	229.7	-15.5649	-14.3847	-14.6878	-14.8791	-13.2623	-15.019	-14.1407	-9.51854	-12.6767	-12.694	-11.6297	-12.1331	-11.9113	-11.76	-11.9348	-10.0389	-9.92586	-10.3348	-10.0999
	229.6	-15.6552	-14.4776	-14.8087	-14.9805	-13.3484	-15.1337	-14.241	-9.58497	-12.7978	-12.7915	-11.7248	-12.1976	-12.0219	-11.8449	-12.0215	-10.1308	-9.99234	-10.4115	-10.1782
	229.5	-15.7509	-14.5662	-14.9149	-15.0773	-13.4348	-15.2373	-14.3361	-9.64967	-12.9299	-12.8777	-11.8191	-12.2443	-12.1218	-11.9141	-12.0934	-10.2308	-10.0628	-10.4921	-10.2619
	229.4	-15.8627	-14.6559	-15.0138	-15.1775	-13.5248	-15.3485	-14.4367	-9.71687	-13.0253	-12.9589	-11.9004	-12.3116	-12.2274	-11.9807	-12.1732	-10.3177	-10.139	-10.5723	-10.343
	229.3	-15.9853	-14.7462	-15.1303	-15.2873	-13.6065	-15.4408	-14.5236	-9.75929	-13.1057	-13.0218	-11.9623	-12.4277	-12.3251	-12.0702	-12.2743	-10.4012	-10.2086	-10.646	-10.4186
	229.2	-16.0968	-14.8372	-15.2325	-15.3888	-13.6902	-15.5333	-14.6118	-9.80915	-13.1695	-13.079	-12.0192	-12.5297	-12.4183	-12.1568	-12.3683	-10.4868	-10.2803	-10.7048	-10.4906
	229.1	-16.1857	-14.9172	-15.366	-15.4896	-13.7969	-15.6014	-14.6991	-9.87881	-13.2313	-13.1427	-12.0843	-12.6091	-12.4884	-12.232	-12.4432	-10.5765	-10.3458	-10.7602	-10.5608
	229	-16.2767	-14.9915	-15.4864	-15.5849	-13.9095	-15.6628	-14.7861	-9.94481	-13.3118	-13.2099	-12.1555	-12.6956	-12.554	-12.3108	-12.5201	-10.6502	-10.4283	-10.8188	-10.6324
	228.9	-16.348	-15.0855	-15.5965	-15.6767	-14.0206	-15.7298	-14.8752	-9.99719	-13.357	-13.2699	-12.208	-12.7886	-12.6322	-12.3967	-12.6058	-10.7178	-10.4764	-10.8873	-10.6938
	228.8	-16.4237	-15.1512	-15.6944	-15.7564	-14.103	-15.8126	-14.9578	-10.0634	-13.4103	-13.3241	-12.2659	-12.8808	-12.7065	-12.4791	-12.6888	-10.7942	-10.5461	-10.9672	-10.7692
	228.7	-16.5082	-15.208	-15.7912	-15.8358	-14.177	-15.8859	-15.0314	-10.1486	-13.4677	-13.3771	-12.3311	-12.9531	-12.8114	-12.5596	-12.7747	-10.8772	-10.5882	-11.0438	-10.8364
	228.6	-16.5748	-15.2583	-15.8824	-15.9052	-14.271	-15.9631	-15.1171	-10.2418	-13.5142	-13.4323	-12.3961	-13.0382	-12.9255	-12.6284	-12.864	-10.9567	-10.6648	-11.1013	-10.9076
	228.5	-16.6494	-15.305	-15.9567	-15.9704	-14.3655	-16.0417	-15.2036	-10.3206	-13.5726	-13.4981	-12.4638	-13.1161	-13.0159	-12.6854	-12.9391	-11.0237	-10.7602	-11.1575	-10.9805
	228.4	-16.7118	-15.3512	-16.0125	-16.0252	-14.4547	-16.1162	-15.2855	-10.3954	-13.6235	-13.5674	-12.5288	-13.2003	-13.0779	-12.746	-13.0081	-11.0942	-10.8474	-11.2171	-11.0529
	228.3	-16.7741	-15.3919	-16.0683	-16.0781	-14.5561	-16.1941	-15.3751	-10.4681	-13.6533	-13.6375	-12.5863	-13.2963	-13.1267	-12.8299	-13.0843	-11.168	-10.9048	-11.2813	-11.118
	228.2	-16.8387	-15.4389	-16.1292	-16.1356	-14.6739	-16.2767	-15.4753	-10.5163	-13.6796	-13.7042	-12.6334	-13.4025	-13.1889	-12.9286	-13.1733	-11.2331	-10.9582	-11.3444	-11.1786
	228.1	-16.9068	-15.4904	-16.1789	-16.192	-14.7795	-16.3499	-15.5647	-10.568	-13.6801	-13.7675	-12.6719	-13.4928	-13.2318	-13.0182	-13.2476	-11.2925	-11.0344	-11.4095	-11.2455
	228	-16.9598	-15.5304	-16.2115	-16.2339	-14.8602	-16.4067	-15.6334	-10.6269	-13.6999	-13.8134	-12.7134	-13.5892	-13.2374	-13.0895	-13.3054	-11.3519	-11.1111	-11.4702	-11.3111
	227.9	-17.0057	-15.5702	-16.2488	-16.2749	-14.9575	-16.4491	-15.7033	-10.6617	-13.7169	-13.8563	-12.745	-13.6772	-13.23	-13.1472	-13.3515	-11.4012	-11.1806	-11.5378	-11.3732
	227.8	-17.0631	-15.6405	-16.2867	-16.3301	-15.0244	-16.4854	-15.7549	-10.6774	-13.7203	-13.902	-12.7666	-13.7678	-13.2798	-13.1819	-13.4098	-11.4455	-11.2342	-11.6053	-11.4283
	227.7	-17.1202	-15.7029	-16.317	-16.38	-15.0688	-16.5247	-15.7967	-10.6823	-13.7045	-13.946	-12.7776	-13.8584	-13.3185	-13.2097	-13.4622	-11.5005	-11.2747	-11.644	-11.4731
	227.6	-17.1617	-15.7442	-16.339	-16.415	-15.1017	-16.5604	-15.8311	-10.7086	-13.7087	-13.9827	-12.8	-13.9326	-13.3468	-13.2392	-13.5062	-11.552	-11.3113	-11.6659	-11.5097
	227.5	-17.1972	-15.7791	-16.3587	-16.445	-15.1259	-16.6024	-15.8641	-10.7378	-13.7149	-14.0262	-12.8263	-13.976	-13.3647	-13.2772	-13.5393	-11.6172	-11.3323	-11.6831	-11.5442
	227.4	-17.222	-15.7705	-16.3668	-16.4531	-15.1449	-16.6521	-15.8985	-10.7663	-13.7115	-14.0641	-12.8473	-14.0195	-13.3731	-13.3252	-13.5726	-11.6717	-11.353	-11.6959	-11.5735
	227.3	-17.2492	-15.779	-16.3693	-16.4658	-15.1652	-16.696	-15.9306	-10.7856	-13.717	-14.1033	-12.8686	-14.0401	-13.3855	-13.3837	-13.6031	-11.7306	-11.3831	-11.7129	-11.6089
	227.2	-17.2715	-15.7907	-16.3536	-16.4719	-15.1845	-16.7288	-15.9566	-10.7972	-13.7527	-14.151	-12.9003	-14.0565	-13.4064	-13.4538	-13.6389	-11.8015	-11.4178	-11.7405	-11.6533
	227.1	-17.2637	-15.809	-16.3326	-16.4684	-15.2043	-16.7489	-15.9766	-10.8023	-13.778	-14.1885	-12.9229	-14.0596	-13.433	-13.5058	-13.6661	-11.8738	-11.4553	-11.7699	-11.6997
	227	-17.2531	-15.8208	-16.3083	-16.4607	-15.2162	-16.7616	-15.9889	-10.8121	-13.7955	-14.2306	-12.9461	-14.0686	-13.4588	-13.5474	-13.6916	-11.9257	-11.4874	-11.8061	-11.7397
	226.9	-17.2621	-15.8294	-16.2952	-16.4622	-15.2323	-16.7782	-16.0053	-10.8315	-13.852	-14.2601	-12.9812	-14.0704	-13.5043	-13.6006	-13.7251	-11.9673	-11.5377	-11.8345	-11.7798
	226.8	-17.2631	-15.8322	-16.273	-16.4561	-15.2288	-16.8115	-16.0202	-10.8478	-13.913	-14.2958	-13.0189	-14.0756	-13.5543	-13.6445	-13.7581	-12.0181	-11.5922	-11.8603	-11.8235
	226.7	-17.2867	-15.8325	-16.2466	-16.4553	-15.2402	-16.8379	-16.039	-10.8831	-13.9659	-14.2982	-13.0491	-14.0792	-13.6017	-13.6801	-13.787	-12.0748	-11.6702	-11.8908	-11.8786
	226.6	-17.3167	-15.8387	-16.203	-16.4528	-15.2569	-16.8417	-16.0493	-10.8929	-14.045	-14.2873	-13.0751	-14.0777	-13.6169	-13.6913	-13.7953	-12.1216	-11.7421	-11.9072	-11.9236
	226.5	-17.3133	-15.821	-16.1523	-16.4289	-15.2553	-16.8414	-16.0483	-10.8982	-14.0857	-14.2555	-13.0798	-14.1067	-13.5996	-13.7017	-13.8027	-12.1532	-11.7777	-11.9166	-11.9492
	226.4	-17.3137	-15.7773	-16.1021	-16.3977	-15.2532	-16.8403	-16.0467	-10.9248	-14.0997	-14.2347	-13.0864	-14.1335	-13.5612	-13.714	-13.8029	-12.1649	-11.8038	-11.9217	-11.9635
	226.3	-17.332	-15.7347	-16.0485	-16.3717	-15.2366	-16.8296	-16.0331	-10.9438	-14.0692	-14.2134	-13.0755	-14.1504	-13.5387	-13.7405	-13.8099	-12.1742	-11.8167	-11.9325	-11.9745
	226.2	-17.3396	-15.6919	-15.9894	-16.3403	-15.2288	-16.8321	-16.0305	-10.9546	-14.0244	-14.2059	-13.0616	-14.1746	-13.5215	-13.7605	-13.8189	-12.1843	-11.8525	-11.9531	-11.9966
	226.1	-17.3189	-15.649	-15.9361	-16.3013	-15.2073	-16.8226	-16.0149	-10.9623	-14.0057	-14.1946	-13.0542	-14.1873	-13.5111	-13.7829	-13.8271	-12.2047	-11.8907	-11.9788	-12.0247
	226	-17.2893	-15.6016	-15.8682	-16.253	-15.2025	-16.831	-16.0168	-10.9727	-14.0386	-14.174	-13.0618	-14.203	-13.5134	-13.7987	-13.8384	-12.2186	-11.9268	-11.9971	-12.0475
	225.9	-17.2588	-15.5771	-15.8004	-16.2121	-15.1956	-16.8251	-16.0103	-10.9864	-14.0844	-14.1645	-13.0784	-14.2218	-13.5195	-13.8258	-13.8557	-12.2144	-11.9564	-12.0094	-12.0601
	225.8	-17.2346	-15.5399	-15.7121	-16.1622	-15.1671	-16.8411	-16.0041	-10.9925	-14.0972	-14.1444	-13.078	-14.2614	-13.5605	-13.8547	-13.8922	-12.2091	-12.0076	-12.0225	-12.0797
	225.7	-17.184	-15.5141	-15.6309	-16.1097	-15.1278	-16.8446	-15.9862	-10.9749	-14.0874	-14.1201	-13.0608	-14.2888	-13.6103	-13.8732	-13.9241	-12.2341	-12.0337	-12.0229	-12.0969
	225.6	-17.1313	-15.4697	-15.5525	-16.0512	-15.0771	-16.8452	-15.9611	-10.9655	-14.1401	-14.1102	-13.0719	-14.2607	-13.6163	-13.8839	-13.9203	-12.2569	-12.0768	-12.0203	-12.118
	225.5	-17.107	-15.4276	-15.4614	-15.9987	-15.0307	-16.8218	-15.9262	-10.9516	-14.1793	-14.1171	-13.0827	-14.2368	-13.5834	-13.881	-13.9004	-12.2769	-12.1042	-12.015	-12.132
	225.4	-17.0699	-15.3742	-15.3716	-15.9386	-14.9974	-16.7831	-15.8903	-10.9421	-14.189	-14.1223	-13.0845	-14.2268	-13.5266	-13.8841	-13.8792	-12.2984	-12.1206	-12.0118	-12.1436
	225.3	-16.9893	-15.2958	-15.2888	-15.858	-14.963	-16.7527	-15.8578	-10.9037	-14.1647	-14.1216	-13.0633	-14.2173	-13.4494	-13.9047	-13.8571	-12.314	-12.118	-12.0186	-12.1502
	225.2	-16.9129	-15.231	-15.2184	-15.7874	-14.914	-16.7269	-15.8205	-10.8671	-14.1245	-14.1166	-13.0361	-14.1932	-13.3959	-13.9198	-13.8363	-12.335	-12.0903	-12.0216	-12.149
	225.1	-16.8381	-15.1585	-15.1361	-15.7109	-14.8692	-16.7024	-15.7858	-10.8358	-14.0902	-14.1013	-13.0091	-14.1684	-13.3608	-13.9211	-13.8168	-12.3322	-12.0598	-12.0319	-12.1413
	225	-16.7442	-15.0615	-15.0626	-15.6228	-14.8212	-16.6501	-15.7356	-10.7942	-14.1012	-14.0696	-12.9883	-14.1213	-13.355	-13.9112	-13.7958	-12.3195	-12.0567	-12.0407	-12.139
	224.9	-16.6543	-14.9624	-14.9956	-15.5374	-14.7764	-16.5816	-15.679	-10.7599	-14.1653	-14.0301	-12.9851	-14.0789	-13.3286	-13.8965	-13.768	-12.3106	-12.0324	-12.0434	-12.1288
	224.8	-16.5841	-14.8714	-14.9102	-15.4552	-14.7092	-16.4992	-15.6042	-10.7209	-14.2401	-13.9846	-12.9819	-14.0468	-13.2937	-13.8805	-13.7403	-12.305	-12.0117	-12.0226	-12.1131
	224.7	-16.5187	-14.7576	-14.8142	-15.3635	-14.653	-16.4148	-15.5339	-10.6744	-14.2608	-13.9388	-12.958	-14.0243	-13.2976	-13.8684	-13.7301	-12.2741	-11.9962	-11.994	-12.0881
	224.6	-16.4305	-14.6532	-14.7081	-15.2639	-14.5736	-16.3455	-15.4596	-10.6423	-14.2701	-13.9025	-12.9383	-13.9846	-13.3052	-13.8519	-13.7139	-12.2401	-11.9826	-11.9734	-12.0654
	224.5	-16.3136	-14.518	-14.5987	-15.1434	-14.506	-16.2798	-15.3929	-10.6369	-14.2793	-13.8662	-12.9275	-13.9249	-13.2709	-13.8493	-13.6817	-12.2134	-11.9427	-11.9555	-12.0372
	224.4	-16.1806	-14.4038	-14.4787	-15.021	-14.4242	-16.2067	-15.3155	-10.6411	-14.2852	-13.8268	-12.9177	-13.8811	-13.2357	-13.8483	-13.655	-12.1932	-11.8985	-11.9488	-12.0135
	224.3	-16.0792	-14.295	-14.3687	-14.9143	-14.3442	-16.1452	-15.2447	-10.6329	-14.2541	-13.8017	-12.8962	-13.8237	-13.1801	-13.8397	-13.6145	-12.1682	-11.8373	-11.9596	-11.9884
	224.2	-15.9883	-14.1745	-14.2349	-14.7992	-14.2691	-16.0648	-15.1669	-10.5985	-14.2148	-13.7624	-12.8586	-13.7744	-13.1093	-13.8305	-13.5714	-12.1232	-11.8175	-11.9784	-11.973
	224.1	-15.8825	-14.067	-14.1062	-14.6852	-14.1995	-15.9673	-15.0834	-10.5835	-14.1957	-13.7215	-12.8336	-13.6984	-13.0835	-13.8051	-13.529	-12.0792	-11.8224	-11.9804	-11.9607
	224	-15.7895	-13.959	-13.9916	-14.58	-14.1244	-15.8743	-14.9993	-10.5426	-14.1616	-13.6734	-12.7925	-13.6491	-13.0599	-13.7626	-13.4905	-12.043	-11.8112	-11.9555	-11.9366
	223.9	-15.6992	-13.8583	-13.9035	-14.487	-14.0527	-15.7798	-14.9162	-10.498	-14.0942	-13.6168	-12.7363	-13.6304	-13.0158	-13.7024	-13.4495	-11.9897	-11.7768	-11.9219	-11.8961
	223.8	-15.5886	-13.7657	-13.8333	-14.3959	-13.9679	-15.6818	-14.8249	-10.4576	-14.0201	-13.5429	-12.6735	-13.6084	-12.9599	-13.6436	-13.404	-11.9319	-11.7294	-11.8849	-11.8487
	223.7	-15.4915	-13.6913	-13.7408	-14.3079	-13.8656	-15.5926	-14.7291	-10.4225	-13.9235	-13.4712	-12.6057	-13.5676	-12.8963	-13.5744	-13.3461	-11.8786	-11.695	-11.8402	-11.8046
	223.6	-15.3969	-13.5753	-13.6563	-14.2095	-13.7635	-15.5002	-14.6319	-10.3796	-13.7833	-13.3913	-12.5181	-13.5105	-12.8337	-13.5154	-13.2865	-11.8473	-11.6582	-11.8013	-11.7689
	223.5	-15.2826	-13.4497	-13.559	-14.0971	-13.6692	-15.4069	-14.5381	-10.3451	-13.6569	-13.3069	-12.4363	-13.454	-12.7584	-13.471	-13.2278	-11.8165	-11.6159	-11.7658	-11.7327
	223.4	-15.1449	-13.329	-13.4447	-13.9729	-13.5638	-15.3082	-14.436	-10.3069	-13.5118	-13.228	-12.3489	-13.371	-12.6826	-13.4278	-13.1605	-11.7605	-11.5411	-11.7069	-11.6695
	223.3	-14.9942	-13.1738	-13.319	-13.829	-13.4366	-15.2047	-14.3207	-10.254	-13.3676	-13.1553	-12.259	-13.267	-12.6126	-13.3797	-13.0864	-11.7042	-11.4535	-11.6567	-11.6048
	223.2	-14.8404	-13.0253	-13.1759	-13.6805	-13.3269	-15.102	-14.2144	-10.2025	-13.2572	-13.072	-12.1772	-13.1625	-12.5428	-13.3346	-13.0133	-11.6554	-11.3481	-11.6015	-11.535
	223.1	-14.6872	-12.8897	-13.0566	-13.5445	-13.219	-14.9997	-14.1093	-10.128	-13.1611	-12.993	-12.094	-13.0755	-12.5026	-13.2945	-12.9575	-11.6082	-11.2638	-11.5315	-11.4678
	223	-14.4994	-12.7506	-12.9283	-13.3928	-13.1189	-14.8916	-14.0053	-10.0559	-13.0768	-12.9266	-12.0198	-13.0057	-12.4576	-13.235	-12.8994	-11.5597	-11.2031	-11.4571	-11.4066
	222.9	-14.3083	-12.6147	-12.7945	-13.2392	-13.0193	-14.7629	-13.8911	-9.98861	-12.9827	-12.8656	-11.9456	-12.9264	-12.4	-13.1718	-12.8327	-11.5146	-11.1289	-11.3914	-11.345
	222.8	-14.158	-12.4423	-12.6571	-13.0858	-12.9157	-14.6185	-13.7671	-9.93001	-12.9194	-12.8015	-11.8836	-12.83	-12.3532	-13.1248	-12.7693	-11.4643	-11.0432	-11.3218	-11.2764
	222.7	-14.0013	-12.2664	-12.5165	-12.9281	-12.7963	-14.4585	-13.6274	-9.87552	-12.8029	-12.7518	-11.8101	-12.7399	-12.3007	-13.0732	-12.7046	-11.4056	-10.9596	-11.2435	-11.2029
	222.6	-13.8217	-12.0627	-12.372	-12.7521	-12.664	-14.2735	-13.4688	-9.83488	-12.6728	-12.6845	-11.7307	-12.5985	-12.2042	-12.9977	-12.6001	-11.3399	-10.8895	-11.1732	-11.1342
	222.5	-13.6287	-11.885	-12.233	-12.5822	-12.5372	-14.1157	-13.3265	-9.78948	-12.537	-12.5952	-11.6406	-12.4798	-12.0675	-12.9155	-12.4876	-11.2791	-10.8231	-11.1077	-11.07
	222.4	-13.4414	-11.6758	-12.0872	-12.4015	-12.4116	-13.9457	-13.1787	-9.74062	-12.4147	-12.5084	-11.5546	-12.3984	-11.9574	-12.8408	-12.3989	-11.2088	-10.7223	-11.0328	-10.988
	222.3	-13.2524	-11.4365	-11.9214	-12.2034	-12.2877	-13.763	-13.0253	-9.69787	-12.256	-12.4013	-11.4517	-12.3216	-11.8809	-12.7522	-12.3182	-11.143	-10.6199	-10.9669	-10.9099
	222.2	-13.0625	-11.2045	-11.8006	-12.0225	-12.1744	-13.6035	-12.889	-9.61935	-12.0868	-12.273	-11.3264	-12.2047	-11.848	-12.6598	-12.2375	-11.0692	-10.5381	-10.8957	-10.8343
	222.1	-12.8377	-10.979	-11.6512	-11.8226	-12.0482	-13.4235	-12.7358	-9.53553	-11.9257	-12.1493	-11.2035	-12.127	-11.7732	-12.5552	-12.1518	-10.987	-10.4441	-10.8291	-10.7534
	222	-12.6244	-10.7646	-11.492	-11.627	-11.9165	-13.2497	-12.5831	-9.44939	-11.7965	-12.0299	-11.0919	-12.0423	-11.6774	-12.4321	-12.0506	-10.896	-10.3626	-10.7545	-10.671
	221.9	-12.412	-10.5801	-11.2923	-11.4281	-11.7805	-13.0554	-12.418	-9.36846	-11.6821	-11.9097	-10.9868	-11.9521	-11.5583	-12.3105	-11.9403	-10.8271	-10.295	-10.6852	-10.6024
	221.8	-12.182	-10.3957	-11.0828	-11.2202	-11.6509	-12.8393	-12.2451	-9.28512	-11.5738	-11.8112	-10.89	-11.8462	-11.4726	-12.2064	-11.8417	-10.7627	-10.2151	-10.6193	-10.5324
	221.7	-11.9726	-10.2413	-10.8917	-11.0352	-11.5178	-12.6652	-12.0915	-9.21385	-11.452	-11.7053	-10.7904	-11.7192	-11.3817	-12.1066	-11.7358	-10.6824	-10.1229	-10.5419	-10.4491
	221.6	-11.7555	-10.0741	-10.7048	-10.8448	-11.3615	-12.4831	-11.9223	-9.15475	-11.3147	-11.569	-10.6795	-11.5763	-11.2779	-11.9919	-11.6154	-10.5988	-10.0761	-10.4513	-10.3754
	221.5	-11.5325	-9.88195	-10.5368	-10.6504	-11.1847	-12.3164	-11.7506	-9.09071	-11.1296	-11.4384	-10.5529	-11.4332	-11.1692	-11.8688	-11.4904	-10.5323	-9.99483	-10.3777	-10.3016
	221.4	-11.3327	-9.67455	-10.3714	-10.4596	-10.9931	-12.1609	-11.577	-9.02731	-10.9478	-11.3113	-10.4288	-11.2822	-11.0537	-11.7428	-11.3596	-10.4799	-9.8722	-10.2989	-10.217
	221.3	-11.1666	-9.46925	-10.2318	-10.2892	-10.8494	-11.9948	-11.4221	-8.9484	-10.7463	-11.2001	-10.2983	-11.14	-10.9416	-11.6252	-11.2356	-10.4279	-9.73358	-10.223	-10.1282
	221.2	-11.0197	-9.25297	-10.0844	-10.119	-10.7145	-11.8229	-11.2687	-8.8638	-10.5403	-11.065	-10.1564	-11.047	-10.8227	-11.4999	-11.1232	-10.3685	-9.6002	-10.1382	-10.0356
	221.1	-10.8564	-9.037	-9.89099	-9.92813	-10.5789	-11.6497	-11.1143	-8.7751	-10.3829	-10.9376	-10.0319	-11.0075	-10.6428	-11.3869	-11.0124	-10.3002	-9.51446	-10.0318	-9.94882
	221	-10.6887	-8.83512	-9.71111	-9.74498	-10.4413	-11.45	-10.9457	-8.66633	-10.2317	-10.792	-9.89668	-10.9673	-10.4796	-11.2825	-10.9098	-10.2374	-9.45692	-9.93775	-9.87736
	220.9	-10.5304	-8.62032	-9.54152	-9.56408	-10.3002	-11.2474	-10.7738	-8.54309	-10.0762	-10.6669	-9.76206	-10.9104	-10.3876	-11.1937	-10.8306	-10.1557	-9.39851	-9.8208	-9.79167
	220.8	-10.3721	-8.43417	-9.38744	-9.3979	-10.1424	-11.0564	-10.5994	-8.42026	-9.92489	-10.5604	-9.63518	-10.8199	-10.2937	-11.1005	-10.738	-10.0861	-9.31401	-9.73598	-9.71203
	220.7	-10.1622	-8.24949	-9.21618	-9.20929	-9.98556	-10.893	-10.4393	-8.3005	-9.74891	-10.461	-9.50347	-10.743	-10.239	-11.0092	-10.6637	-9.98521	-9.27283	-9.65396	-9.63733
	220.6	-9.92846	-8.00385	-9.0386	-8.9903	-9.8365	-10.7237	-10.2801	-8.19152	-9.56468	-10.3284	-9.36153	-10.6231	-10.1329	-10.9	-10.552	-9.90136	-9.25229	-9.5911	-9.58158
	220.5	-9.69574	-7.7948	-8.83549	-8.77534	-9.67276	-10.5473	-10.11	-8.07904	-9.38708	-10.1845	-9.21687	-10.5158	-10.0433	-10.794	-10.451	-9.83638	-9.22448	-9.52664	-9.52917
	220.4	-9.48333	-7.55819	-8.65217	-8.56456	-9.55427	-10.376	-9.96514	-7.97817	-9.22514	-10.0299	-9.07774	-10.4384	-9.96254	-10.6926	-10.3645	-9.77584	-9.13546	-9.46064	-9.45731
	220.3	-9.26513	-7.32627	-8.46772	-8.35304	-9.46162	-10.2038	-9.83271	-7.90716	-9.12799	-9.90196	-8.97904	-10.353	-9.89125	-10.5918	-10.2787	-9.68371	-9.03632	-9.38425	-9.36809
	220.2	-9.07503	-7.10056	-8.26219	-8.14593	-9.38246	-10.0397	-9.71108	-7.8187	-9.03057	-9.77631	-8.87519	-10.2422	-9.82397	-10.4795	-10.1819	-9.57991	-8.95809	-9.3036	-9.28053
	220.1	-8.91835	-6.81057	-8.05477	-7.9279	-9.28928	-9.84645	-9.56787	-7.70639	-8.97441	-9.65225	-8.77768	-10.1563	-9.73499	-10.3808	-10.0907	-9.49962	-8.92894	-9.23716	-9.22191
	220	-8.78948	-6.53761	-7.84412	-7.72374	-9.2122	-9.66114	-9.43667	-7.60624	-8.89771	-9.52333	-8.67576	-10.1012	-9.68951	-10.2785	-10.0231	-9.42221	-8.91499	-9.17706	-9.17142
	219.9	-8.63516	-6.25605	-7.64568	-7.5123	-9.12577	-9.45049	-9.28813	-7.51719	-8.83404	-9.40703	-8.58609	-10.0603	-9.60954	-10.1794	-9.94975	-9.35365	-8.89411	-9.11595	-9.12124
	219.8	-8.50048	-5.98744	-7.45848	-7.31547	-9.03058	-9.21668	-9.12363	-7.40656	-8.73703	-9.30003	-8.48121	-10.0424	-9.49356	-10.0752	-9.87039	-9.28283	-8.85396	-9.06196	-9.06625
	219.7	-8.34497	-5.71318	-7.31147	-7.12321	-8.92696	-8.99286	-8.95991	-7.28388	-8.61628	-9.20459	-8.36825	-9.96732	-9.35725	-9.9787	-9.76776	-9.20092	-8.78581	-9.02288	-9.0032
	219.6	-8.17611	-5.46303	-7.16285	-6.934	-8.83072	-8.77309	-8.8019	-7.18593	-8.50624	-9.08275	-8.25831	-9.82996	-9.21562	-9.88098	-9.64219	-9.11184	-8.77035	-8.96077	-8.94765
	219.5	-7.99086	-5.27922	-6.97939	-6.74982	-8.73266	-8.58986	-8.66126	-7.10171	-8.36787	-8.97661	-8.14873	-9.73563	-9.1049	-9.75748	-9.53267	-9.03029	-8.75618	-8.87781	-8.88809
	219.4	-7.77419	-5.13783	-6.78598	-6.566	-8.61566	-8.43215	-8.5239	-6.99521	-8.25472	-8.86159	-8.03717	-9.64151	-9.0083	-9.63041	-9.42674	-8.95384	-8.69294	-8.77905	-8.80861
	219.3	-7.56107	-4.99865	-6.61988	-6.3932	-8.46602	-8.31442	-8.39022	-6.88599	-8.17534	-8.73919	-7.93351	-9.55029	-8.91739	-9.52187	-9.32985	-8.88603	-8.60542	-8.6835	-8.72498
	219.2	-7.36932	-4.8067	-6.49801	-6.22468	-8.34915	-8.17143	-8.26029	-6.75988	-8.05693	-8.63466	-7.81716	-9.45116	-8.83576	-9.4054	-9.23077	-8.79417	-8.5251	-8.61271	-8.64399
	219.1	-7.2146	-4.59754	-6.37396	-6.06203	-8.20501	-7.98729	-8.09615	-6.63305	-7.94365	-8.51589	-7.69753	-9.27746	-8.69947	-9.28521	-9.08738	-8.67085	-8.45353	-8.56317	-8.56252
	219	-7.03933	-4.48427	-6.242	-5.92187	-8.07378	-7.8415	-7.95764	-6.50552	-7.86095	-8.39218	-7.58622	-9.11644	-8.51077	-9.19352	-8.94024	-8.54519	-8.41901	-8.48446	-8.48289
	218.9	-6.86185	-4.37829	-6.0852	-5.77511	-7.94763	-7.68137	-7.8145	-6.41591	-7.77814	-8.29249	-7.49551	-9.02735	-8.33008	-9.10864	-8.82202	-8.44184	-8.39259	-8.40651	-8.41365
	218.8	-6.69018	-4.27673	-5.9459	-5.6376	-7.83044	-7.54181	-7.68613	-6.33094	-7.68661	-8.17592	-7.39782	-8.91589	-8.25016	-9.03969	-8.73525	-8.33886	-8.36694	-8.35175	-8.35252
	218.7	-6.57377	-4.1703	-5.82688	-5.52365	-7.72567	-7.43236	-7.57902	-6.26695	-7.6159	-8.06908	-7.31731	-8.75278	-8.27575	-8.98605	-8.67153	-8.24874	-8.28935	-8.30103	-8.27971
	218.6	-6.50439	-4.10045	-5.75009	-5.45164	-7.61369	-7.32597	-7.46983	-6.20928	-7.51903	-7.93473	-7.22101	-8.6009	-8.28373	-8.91174	-8.59879	-8.15688	-8.17284	-8.24159	-8.19044
	218.5	-6.43449	-4.00671	-5.67895	-5.37338	-7.49726	-7.23653	-7.36689	-6.18432	-7.44605	-7.78559	-7.13865	-8.46189	-8.26075	-8.80607	-8.50957	-8.06516	-8.07895	-8.17226	-8.10546
	218.4	-6.35045	-3.84516	-5.60127	-5.26563	-7.40253	-7.08191	-7.24222	-6.11256	-7.35531	-7.67183	-7.04657	-8.33721	-8.19066	-8.68167	-8.40318	-8.00798	-7.97427	-8.09915	-8.02713
	218.3	-6.22143	-3.75988	-5.4441	-5.1418	-7.29298	-6.9298	-7.11139	-6.0335	-7.28524	-7.58968	-6.96947	-8.20419	-8.09709	-8.57691	-8.29273	-7.95969	-7.83644	-8.03251	-7.94288
	218.2	-6.05725	-3.64708	-5.2483	-4.98421	-7.20272	-6.81823	-7.01047	-5.94693	-7.20357	-7.53001	-6.8935	-8.09722	-8.02019	-8.50584	-8.20775	-7.90347	-7.75649	-7.94545	-7.86847
	218.1	-5.90243	-3.52588	-5.06301	-4.83044	-7.13267	-6.6804	-6.90653	-5.88151	-7.15985	-7.48566	-6.84234	-7.97995	-7.99214	-8.43931	-8.13713	-7.84622	-7.68732	-7.86425	-7.79926
	218	-5.68462	-3.35788	-4.87785	-4.64012	-7.06124	-6.5723	-6.81677	-5.83844	-7.11845	-7.42224	-6.79304	-7.90965	-7.95788	-8.38096	-8.08283	-7.77447	-7.66681	-7.80846	-7.74991
	217.9	-5.51819	-3.18975	-4.6819	-4.46328	-6.95969	-6.44866	-6.70418	-5.81106	-7.12268	-7.36147	-6.76507	-7.79357	-7.95518	-8.32065	-8.02313	-7.70387	-7.64289	-7.72514	-7.69063
	217.8	-5.39392	-3.00559	-4.5119	-4.3038	-6.87599	-6.29985	-6.58792	-5.78629	-7.08019	-7.29917	-6.72188	-7.59986	-7.965	-8.25055	-7.93847	-7.62052	-7.60157	-7.65078	-7.62429
	217.7	-5.2699	-2.86553	-4.39632	-4.17725	-6.79346	-6.16135	-6.4774	-5.74706	-7.0251	-7.25789	-6.67668	-7.39869	-7.99067	-8.17477	-7.85471	-7.5054	-7.55562	-7.56765	-7.54289
	217.6	-5.09473	-2.75589	-4.31757	-4.05606	-6.70899	-6.02388	-6.36644	-5.72218	-6.99124	-7.24352	-6.65231	-7.23443	-7.96567	-8.08731	-7.76247	-7.40591	-7.4694	-7.5265	-7.46727
	217.5	-4.89962	-2.68579	-4.21505	-3.93349	-6.61069	-5.90587	-6.25828	-5.6727	-6.98596	-7.20751	-6.62206	-7.058	-7.94263	-7.95336	-7.65133	-7.31308	-7.40458	-7.45114	-7.3896
	217.4	-4.76208	-2.55823	-4.13427	-3.81819	-6.50921	-5.7815	-6.14536	-5.59476	-6.98296	-7.16503	-6.58092	-6.90808	-7.87172	-7.83043	-7.53674	-7.26276	-7.36416	-7.37138	-7.33277
	217.3	-4.66677	-2.49055	-3.99379	-3.71704	-6.39084	-5.66423	-6.02754	-5.53945	-6.96799	-7.12718	-6.54487	-6.77426	-7.76752	-7.74269	-7.42816	-7.23726	-7.23985	-7.31037	-7.26249
	217.2	-4.55073	-2.40602	-3.82811	-3.59495	-6.27555	-5.5527	-5.91413	-5.47676	-6.93335	-7.08985	-6.49999	-6.64879	-7.67974	-7.67295	-7.33383	-7.19846	-7.10812	-7.24256	-7.18305
	217.1	-4.4571	-2.21983	-3.66628	-3.44774	-6.11669	-5.4705	-5.79359	-5.38803	-6.91086	-7.05223	-6.45037	-6.51442	-7.61477	-7.60048	-7.24322	-7.12922	-7.04816	-7.16438	-7.11392
	217	-4.3465	-2.06293	-3.50166	-3.3037	-5.97683	-5.38373	-5.68028	-5.29303	-6.82458	-7.00063	-6.37275	-6.3712	-7.53696	-7.56556	-7.15791	-7.09354	-7.01281	-7.08965	-7.06533
	216.9	-4.19474	-1.92579	-3.36481	-3.16178	-5.83582	-5.26153	-5.54867	-5.20387	-6.7597	-6.91116	-6.29158	-6.27835	-7.40784	-7.52425	-7.07015	-7.07758	-6.91726	-7.02766	-7.0075
	216.8	-4.04425	-1.85886	-3.26683	-3.05665	-5.67698	-5.16169	-5.41934	-5.12799	-6.6448	-6.83673	-6.20317	-6.16167	-7.32428	-7.44943	-6.97846	-7.05234	-6.81489	-6.99272	-6.95332
	216.7	-3.87074	-1.82969	-3.1727	-2.95771	-5.51491	-5.05376	-5.28434	-5.04697	-6.5537	-6.76665	-6.12244	-6.01224	-7.22944	-7.38168	-6.87445	-6.99936	-6.7207	-6.93798	-6.88601
	216.6	-3.75231	-1.81552	-3.15514	-2.90766	-5.36638	-4.95465	-5.16052	-4.97502	-6.41215	-6.6721	-6.01976	-5.85271	-7.16472	-7.33363	-6.78369	-6.96251	-6.61244	-6.87563	-6.81686
	216.5	-3.62687	-1.77583	-3.19159	-2.86476	-5.20343	-4.88774	-5.04558	-4.89518	-6.31712	-6.57546	-5.92925	-5.67888	-7.11938	-7.2616	-6.68662	-6.91228	-6.55643	-6.84373	-6.77081
	216.4	-3.48867	-1.73701	-3.21538	-2.81369	-5.05695	-4.80235	-4.92965	-4.8775	-6.24106	-6.48717	-5.86858	-5.52109	-7.09971	-7.18292	-6.60124	-6.8565	-6.53468	-6.79305	-6.72808
	216.3	-3.43431	-1.75406	-3.21093	-2.79977	-4.92965	-4.73036	-4.83	-4.85263	-6.17493	-6.42542	-5.81766	-5.35411	-7.0599	-7.09099	-6.50167	-6.85251	-6.51656	-6.73049	-6.69985
	216.2	-3.36311	-1.58926	-3.23461	-2.72899	-4.78349	-4.65959	-4.72154	-4.81252	-6.0942	-6.37739	-5.76137	-5.26347	-7.00938	-7.01876	-6.43054	-6.82888	-6.48872	-6.68386	-6.66715
	216.1	-3.30974	-1.40075	-3.27704	-2.66251	-4.68229	-4.60281	-4.64255	-4.80864	-6.02101	-6.30874	-5.7128	-5.16794	-6.90734	-6.96469	-6.34666	-6.7768	-6.5212	-6.63467	-6.64422
	216	-3.30429	-1.22524	-3.26957	-2.5997	-4.62976	-4.50952	-4.56964	-4.81856	-5.90821	-6.24743	-5.65807	-5.09838	-6.7952	-6.89273	-6.2621	-6.73462	-6.53701	-6.5849	-6.61884
	215.9	-3.29138	-1.12677	-3.20387	-2.54067	-4.58631	-4.40793	-4.49712	-4.84786	-5.78217	-6.17075	-5.60026	-5.061	-6.66768	-6.80278	-6.17715	-6.70623	-6.54543	-6.51828	-6.58998
	215.8	-3.23755	-1.06527	-3.07033	-2.45772	-4.52154	-4.34968	-4.43561	-4.89492	-5.68658	-6.12508	-5.56886	-5.00382	-6.57669	-6.71659	-6.09903	-6.6889	-6.50821	-6.44282	-6.54664
	215.7	-3.15429	-0.917655	-2.94167	-2.33787	-4.50005	-4.29381	-4.39693	-4.94532	-5.55297	-6.10945	-5.53591	-4.96238	-6.51738	-6.58341	-6.02106	-6.70283	-6.50858	-6.38503	-6.53215
	215.6	-3.07914	-0.720824	-2.84168	-2.21388	-4.46298	-4.21986	-4.34142	-4.96383	-5.34844	-6.08125	-5.46451	-4.99697	-6.56589	-6.49972	-6.02086	-6.67092	-6.51264	-6.32968	-6.50441
	215.5	-3.05143	-0.491342	-2.72229	-2.08835	-4.42115	-4.15023	-4.28569	-4.96825	-5.23478	-6.04331	-5.41545	-4.93116	-6.52165	-6.44287	-5.96523	-6.65513	-6.53493	-6.26896	-6.48634
	215.4	-2.9942	-0.301379	-2.64521	-1.98026	-4.37765	-4.01896	-4.1983	-4.95119	-5.12879	-6.01444	-5.36481	-4.82608	-6.35538	-6.37546	-5.85231	-6.67641	-6.548	-6.18114	-6.46852
	215.3	-2.94875	-0.0942574	-2.56181	-1.86827	-4.30915	-3.84665	-4.0779	-4.93793	-5.00426	-5.99955	-5.31391	-4.71817	-6.1325	-6.27733	-5.70933	-6.68146	-6.52294	-6.10674	-6.43705
	215.2	-2.90239	0.140426	-2.38088	-1.71428	-4.31626	-3.75426	-4.03526	-4.84813	-4.93271	-5.99938	-5.26007	-4.66592	-5.96205	-6.22648	-5.61815	-6.63862	-6.52695	-6.06278	-6.40945
	215.1	-2.85626	0.284273	-2.23	-1.60066	-4.26774	-3.67076	-3.96925	-4.78284	-4.8896	-5.9759	-5.21611	-4.67574	-5.81909	-6.17523	-5.55669	-6.58592	-6.49392	-6.03545	-6.37176
	215	-2.91937	0.334954	-2.07035	-1.55159	-4.15281	-3.59077	-3.87179	-4.72685	-4.84758	-5.92962	-5.16802	-4.73511	-5.75882	-6.11982	-5.53792	-6.52028	-6.47332	-6.01106	-6.33489
	214.9	-3.00388	0.47605	-1.99969	-1.50917	-4.06534	-3.50369	-3.78451	-4.71832	-4.82543	-5.85649	-5.13341	-4.76776	-5.69721	-6.04504	-5.50334	-6.44991	-6.44852	-5.9979	-6.29878
	214.8	-2.97732	0.611306	-1.94992	-1.43864	-4.03333	-3.37878	-3.70606	-4.67483	-4.79388	-5.76629	-5.07833	-4.78399	-5.60945	-5.98298	-5.45881	-6.38387	-6.41862	-5.99956	-6.26735
	214.7	-2.91504	0.612857	-1.97901	-1.42706	-4.00089	-3.20827	-3.60458	-4.65203	-4.78745	-5.71134	-5.05027	-4.72557	-5.52381	-5.92299	-5.39079	-6.33773	-6.44192	-5.98438	-6.25468
	214.6	-2.78232	0.574492	-2.01997	-1.40927	-3.92331	-3.05174	-3.48752	-4.65022	-4.7382	-5.67641	-5.02161	-4.68645	-5.42955	-5.87356	-5.32985	-6.2882	-6.45792	-5.96827	-6.23813
	214.5	-2.60201	0.536419	-2.09117	-1.38559	-3.79594	-2.92392	-3.35993	-4.6274	-4.64007	-5.61225	-4.95991	-4.70587	-5.29877	-5.82656	-5.27707	-6.26285	-6.46611	-5.98508	-6.23801
	214.4	-2.4307	0.619302	-2.01794	-1.27645	-3.66956	-2.88943	-3.27949	-4.60364	-4.51498	-5.51481	-4.87781	-4.74042	-5.16884	-5.78896	-5.23274	-6.27351	-6.43782	-5.98431	-6.23188
	214.3	-2.32684	0.801104	-1.88417	-1.13664	-3.64635	-2.90388	-3.27511	-4.55826	-4.47141	-5.40269	-4.81079	-4.72204	-5.06171	-5.79803	-5.19393	-6.31318	-6.4528	-5.95041	-6.2388
	214.2	-2.26666	0.971161	-1.71485	-1.00345	-3.60969	-2.84668	-3.22818	-4.52958	-4.44421	-5.28353	-4.75244	-4.71541	-4.96197	-5.80657	-5.16132	-6.35824	-6.4797	-5.9275	-6.25515
	214.1	-2.24506	1.07648	-1.63374	-0.934107	-3.58969	-2.81227	-3.20098	-4.58238	-4.37007	-5.16688	-4.70644	-4.68149	-4.8795	-5.84481	-5.13527	-6.33994	-6.39219	-5.94739	-6.22651
	214	-2.20872	1.12613	-1.57712	-0.88657	-3.54518	-2.73808	-3.14163	-4.65801	-4.29271	-5.1048	-4.68517	-4.6419	-4.88379	-5.87524	-5.13364	-6.26995	-6.39164	-5.95784	-6.20648
	213.9	-2.14996	1.17105	-1.57749	-0.852133	-3.57081	-2.69403	-3.13242	-4.72112	-4.31734	-5.06685	-4.70177	-4.5603	-4.8743	-5.86999	-5.10153	-6.22567	-6.41052	-5.90452	-6.18024
	213.8	-2.10613	1.109	-1.62458	-0.873903	-3.67	-2.64058	-3.15529	-4.79258	-4.32245	-5.03991	-4.71831	-4.48022	-4.77624	-5.85554	-5.03733	-6.21034	-6.39019	-5.85319	-6.15124
	213.7	-2.09358	1.02708	-1.62971	-0.898737	-3.75894	-2.59174	-3.17534	-4.83933	-4.31788	-5.06764	-4.74162	-4.33525	-4.65919	-5.82016	-4.9382	-6.17307	-6.38398	-5.82302	-6.12669
	213.6	-1.98769	0.910819	-1.72825	-0.93504	-3.78803	-2.5576	-3.17281	-4.82941	-4.37393	-5.10728	-4.77021	-4.23267	-4.57876	-5.71503	-4.84215	-6.15024	-6.48406	-5.78084	-6.13838
	213.5	-1.89863	0.924476	-1.67989	-0.884681	-3.81566	-2.55045	-3.18305	-4.82556	-4.39843	-5.16493	-4.79631	-4.08024	-4.56451	-5.68419	-4.77631	-6.12794	-6.5929	-5.71971	-6.14685
	213.4	-1.88241	1.03547	-1.65544	-0.834127	-3.77697	-2.59641	-3.18669	-4.80476	-4.35597	-5.1947	-4.78514	-3.99097	-4.62647	-5.68126	-4.76623	-6.13308	-6.64879	-5.69038	-6.15742
	213.3	-1.90994	1.17711	-1.64863	-0.79382	-3.76264	-2.69051	-3.22658	-4.77801	-4.32118	-5.24705	-4.78208	-4.01342	-4.65567	-5.66686	-4.77865	-6.12356	-6.65696	-5.71221	-6.16424
	213.2	-1.98691	1.22766	-1.58311	-0.780787	-3.75836	-2.74111	-3.24974	-4.78796	-4.30062	-5.28106	-4.78988	-3.99837	-4.61518	-5.68795	-4.76717	-6.08455	-6.65111	-5.70084	-6.1455
	213.1	-2.00943	1.27351	-1.50311	-0.746343	-3.73964	-2.81346	-3.27655	-4.82641	-4.38881	-5.31466	-4.84329	-3.91891	-4.62619	-5.68697	-4.74402	-6.05651	-6.63441	-5.66849	-6.1198
	213	-1.89764	1.40234	-1.52338	-0.672893	-3.7408	-2.84089	-3.29085	-4.83923	-4.46149	-5.28438	-4.8617	-3.8296	-4.70081	-5.70456	-4.74499	-6.03845	-6.60613	-5.66986	-6.10481
	212.9	-1.82291	1.43893	-1.45162	-0.611867	-3.7138	-2.86751	-3.29066	-4.87767	-4.54808	-5.25157	-4.89244	-3.78094	-4.8086	-5.70494	-4.76483	-6.01382	-6.58954	-5.6907	-6.09802
	212.8	-1.8833	1.35192	-1.28429	-0.605223	-3.7068	-2.82369	-3.26525	-4.85071	-4.72822	-5.18296	-4.92063	-3.66447	-4.80942	-5.68353	-4.71914	-6.01675	-6.47864	-5.71251	-6.0693
	212.7	-1.9216	1.32367	-1.14859	-0.582173	-3.61591	-2.80536	-3.21063	-4.81624	-4.86662	-5.14924	-4.94403	-3.57122	-4.81911	-5.70462	-4.69832	-6.01582	-6.37147	-5.74913	-6.04547
	212.6	-1.92446	1.33256	-1.02783	-0.53991	-3.49284	-2.84511	-3.16898	-4.80957	-5.07691	-5.17002	-5.01883	-3.41609	-4.91375	-5.73956	-4.6898	-5.99222	-6.34125	-5.78073	-6.03807
	212.5	-1.92998	1.43446	-0.910815	-0.468778	-3.41222	-2.79513	-3.10367	-4.79086	-5.28261	-5.16881	-5.08076	-3.32585	-4.96504	-5.78041	-4.69043	-5.96862	-6.35292	-5.77896	-6.0335
	212.4	-1.95492	1.33291	-0.920462	-0.514157	-3.30102	-2.7456	-3.02331	-4.77978	-5.41636	-5.15003	-5.11539	-3.28779	-5.04382	-5.80394	-4.71185	-5.97048	-6.2791	-5.81661	-6.02206
	212.3	-2.03677	1.1481	-0.82584	-0.571503	-3.24398	-2.61737	-2.93067	-4.79965	-5.58419	-5.1001	-5.16131	-3.17288	-5.10396	-5.77937	-4.6854	-5.95821	-6.20834	-5.84054	-6.00236
	212.2	-2.22491	0.950379	-0.676507	-0.650346	-3.23419	-2.48736	-2.86077	-4.85014	-5.65232	-5.08872	-5.19706	-3.10345	-5.10065	-5.73019	-4.64476	-5.96817	-6.17481	-5.84745	-5.99681
	212.1	-2.38021	0.671805	-0.48306	-0.730488	-3.14074	-2.46962	-2.80518	-4.90086	-5.72258	-5.05069	-5.22471	-3.18737	-5.01719	-5.73654	-4.64703	-5.96422	-6.09244	-5.83757	-5.96474
	212	-2.4723	0.373383	-0.367596	-0.822171	-3.12132	-2.53918	-2.83025	-4.89044	-5.88127	-5.04014	-5.27062	-3.35653	-5.02337	-5.77738	-4.71909	-5.96049	-6.16503	-5.80277	-5.9761
	211.9	-2.45526	0.0703667	-0.396595	-0.927163	-3.06046	-2.57557	-2.81801	-4.92078	-5.95674	-4.98719	-5.28824	-3.4345	-5.16021	-5.77087	-4.78853	-5.96191	-6.25742	-5.74356	-5.98763
	211.8	-2.535	-0.246027	-0.453471	-1.07817	-2.94964	-2.55262	-2.75113	-4.96225	-5.98143	-4.9586	-5.30076	-3.45918	-5.29669	-5.7692	-4.84169	-5.96603	-6.31528	-5.672	-5.98444
	211.7	-2.44652	-0.341382	-0.574256	-1.12072	-2.95791	-2.66358	-2.81074	-5.01644	-5.98959	-4.9413	-5.31578	-3.45462	-5.3464	-5.7981	-4.86637	-6.03181	-6.3365	-5.6134	-5.9939
	211.6	-2.44344	-0.399597	-0.549375	-1.1308	-3.00312	-2.66281	-2.83296	-5.06364	-5.89406	-4.97448	-5.31073	-3.3529	-5.34262	-5.82554	-4.84035	-6.1183	-6.33705	-5.59903	-6.01813
	211.5	-2.36252	-0.453315	-0.592845	-1.13623	-2.95045	-2.6717	-2.81107	-5.14171	-5.80619	-5.03255	-5.32682	-3.26549	-5.3458	-5.83319	-4.81483	-6.2046	-6.35666	-5.60219	-6.05448
	211.4	-2.14011	-0.492235	-0.753821	-1.12872	-2.82376	-2.73757	-2.78066	-5.11087	-5.72754	-5.08101	-5.30647	-3.23333	-5.39713	-5.84681	-4.82576	-6.20015	-6.46414	-5.5703	-6.0782
	211.3	-2.06234	-0.666104	-1.05339	-1.26061	-2.67746	-2.75042	-2.71394	-5.07512	-5.80785	-5.08379	-5.32225	-3.17258	-5.41979	-5.82633	-4.80623	-6.24134	-6.45224	-5.5452	-6.07959
	211.2	-2.07054	-0.679897	-1.32891	-1.35978	-2.56762	-2.93342	-2.75052	-4.97421	-6.00056	-5.14398	-5.37292	-2.93028	-5.47913	-5.7779	-4.7291	-6.29478	-6.43375	-5.58124	-6.10326
	211.1	-2.07718	-0.76441	-1.53455	-1.45871	-2.55761	-3.05861	-2.80811	-4.90351	-6.18978	-5.29966	-5.46432	-2.78882	-5.48867	-5.74456	-4.67402	-6.3557	-6.49586	-5.61365	-6.15507
	211	-2.03649	-1.06114	-1.72281	-1.60681	-2.50119	-3.01715	-2.75917	-4.85024	-6.24122	-5.34778	-5.47975	-2.60684	-5.36454	-5.66362	-4.545	-6.42814	-6.56352	-5.68205	-6.22457
	210.9	-2.32947	-1.41661	-1.80603	-1.8507	-2.47076	-3.02514	-2.74795	-4.87357	-6.28599	-5.33822	-5.49926	-2.50211	-5.35165	-5.57776	-4.47717	-6.53721	-6.54002	-5.69809	-6.25844
	210.8	-2.61519	-1.51964	-1.88125	-2.00536	-2.50352	-3.11326	-2.80839	-4.88064	-6.41793	-5.33749	-5.54535	-2.46678	-5.32909	-5.47182	-4.42256	-6.65086	-6.46655	-5.65842	-6.25861
	210.7	-2.64771	-1.41133	-1.98044	-2.01316	-2.55199	-3.07694	-2.81447	-4.77958	-6.516	-5.30413	-5.53324	-2.45071	-5.33376	-5.3689	-4.38446	-6.74437	-6.38818	-5.61431	-6.24895
	210.6	-2.72984	-1.35719	-2.1906	-2.09254	-2.56393	-2.98786	-2.7759	-4.72879	-6.61414	-5.27506	-5.53933	-2.54815	-5.46449	-5.25923	-4.42396	-6.82801	-6.32655	-5.5704	-6.24165
	210.5	-2.77997	-1.28232	-2.06522	-2.0425	-2.47826	-3.0326	-2.75543	-4.71422	-6.72725	-5.20793	-5.5498	-2.67029	-5.58736	-5.15165	-4.46977	-6.88946	-6.36857	-5.56952	-6.27585
	210.4	-2.7397	-1.29514	-1.79919	-1.94468	-2.35158	-3.09201	-2.7218	-4.71555	-6.76849	-5.12112	-5.53505	-3.04514	-5.70989	-5.02011	-4.59171	-6.91225	-6.43201	-5.57041	-6.30489
	210.3	-2.83801	-1.22997	-1.43383	-1.83394	-2.20909	-3.04853	-2.62881	-4.68857	-6.79675	-4.97579	-5.48704	-3.30265	-5.79291	-4.98322	-4.69293	-6.95926	-6.43374	-5.63981	-6.34427
	210.2	-2.96693	-1.32602	-1.25942	-1.85079	-2.07839	-3.06206	-2.57022	-4.68468	-6.7743	-4.83837	-5.43245	-3.39881	-5.70638	-5.0275	-4.7109	-7.01992	-6.41622	-5.73037	-6.38884
	210.1	-3.11172	-1.65086	-0.94379	-1.90212	-2.01239	-3.00175	-2.50707	-4.72503	-6.71009	-4.72938	-5.38817	-3.48192	-5.61076	-5.07685	-4.72318	-6.97669	-6.25322	-5.73449	-6.32147
	210	-3.01469	-1.80307	-0.846702	-1.88815	-1.95696	-2.91708	-2.43702	-4.73894	-6.83513	-4.58684	-5.38697	-3.37073	-5.48279	-5.04209	-4.63187	-6.88504	-6.19761	-5.64931	-6.24399
	209.9	-2.82866	-1.94939	-0.890566	-1.88954	-1.95835	-2.94215	-2.45025	-4.72294	-6.92573	-4.42604	-5.35824	-3.30379	-5.39547	-4.9645	-4.55459	-6.94727	-6.28671	-5.50612	-6.2467
	209.8	-2.90196	-1.95488	-1.01622	-1.95769	-1.99773	-2.99829	-2.49801	-4.61438	-7.09115	-4.30679	-5.33744	-3.29991	-5.42308	-4.8908	-4.53793	-7.03333	-6.29103	-5.44541	-6.25659
	209.7	-3.02218	-2.065	-1.05629	-2.04782	-1.90147	-2.98999	-2.44573	-4.44037	-7.0283	-4.25371	-5.24079	-3.31798	-5.34962	-4.90366	-4.52375	-7.07933	-6.27027	-5.38498	-6.24486
	209.6	-3.22332	-2.00468	-1.00317	-2.07706	-1.90445	-2.95146	-2.42795	-4.33163	-7.04065	-4.2949	-5.22239	-3.30068	-5.19931	-4.89815	-4.46605	-7.10144	-6.32731	-5.2651	-6.23128
	209.5	-3.19439	-2.06309	-1.13944	-2.13231	-1.93738	-3.00032	-2.46885	-4.25162	-6.96844	-4.27817	-5.16608	-3.27211	-5.21497	-4.83447	-4.44052	-7.07502	-6.40297	-5.17991	-6.2193
	209.4	-3.10111	-2.07588	-1.28024	-2.15241	-2.02789	-3.29693	-2.66241	-4.23372	-6.94994	-4.24228	-5.14198	-3.15233	-5.17911	-4.68388	-4.33844	-7.08808	-6.3972	-5.1068	-6.19736
	209.3	-3.31521	-1.98408	-1.33132	-2.2102	-2.20995	-3.56219	-2.88607	-4.14772	-6.83201	-4.15037	-5.04337	-3.07247	-5.15049	-4.58378	-4.26891	-7.13382	-6.39206	-4.9777	-6.16786
	209.2	-3.40912	-2.03656	-1.66562	-2.37043	-2.24792	-3.77269	-3.0103	-4.09749	-6.64539	-4.03922	-4.92737	-2.92746	-4.82398	-4.52248	-4.09131	-7.13364	-6.35419	-4.90934	-6.13239
	209.1	-3.63603	-2.03572	-2.06784	-2.57986	-2.2831	-3.89306	-3.08808	-4.02508	-6.41974	-3.93638	-4.79373	-2.74765	-4.55108	-4.51612	-3.93828	-7.12948	-6.39178	-4.88463	-6.1353
	209	-3.77492	-1.80566	-2.31725	-2.63261	-2.21308	-3.85921	-3.03615	-3.94081	-6.23474	-3.89808	-4.69121	-2.63916	-4.32891	-4.5098	-3.82596	-7.1335	-6.51981	-4.93841	-6.19724
	208.9	-3.91858	-1.72794	-2.30987	-2.65213	-2.02135	-3.77259	-2.89697	-3.94034	-6.0811	-3.81326	-4.61157	-2.52637	-4.32762	-4.50728	-3.78709	-7.26208	-6.67195	-4.88298	-6.27234
	208.8	-4.03468	-1.32613	-2.40625	-2.58902	-2.00853	-3.81546	-2.912	-3.98772	-5.972	-3.79596	-4.58523	-2.26147	-4.51909	-4.55021	-3.77692	-7.26863	-6.68516	-4.99865	-6.31748
	208.7	-3.96292	-0.78487	-2.39162	-2.3798	-1.93175	-3.97724	-2.9545	-4.00948	-5.75788	-3.6209	-4.46275	-1.89602	-4.60907	-4.51759	-3.67423	-7.28727	-6.69323	-5.08903	-6.35651
	208.6	-3.93412	-0.453264	-2.27163	-2.21967	-1.54434	-3.97396	-2.75915	-4.01785	-5.38379	-3.37704	-4.25956	-1.79282	-4.49331	-4.46884	-3.58499	-7.29023	-6.64224	-5.16689	-6.36645
	208.5	-3.69006	-0.257207	-2.26928	-2.07218	-1.12916	-3.80457	-2.46686	-4.07226	-5.30271	-3.23283	-4.2026	-1.55209	-4.66734	-4.50749	-3.57564	-7.32872	-6.69394	-5.23502	-6.41923
	208.4	-3.63459	-0.0235001	-2.21776	-1.95862	-0.742651	-3.84568	-2.29417	-4.19818	-5.35148	-3.01311	-4.18759	-1.16173	-4.70017	-4.49568	-3.45253	-7.27256	-6.9175	-5.29524	-6.4951
	208.3	-3.4885	0.158608	-2.2045	-1.8448	-0.223648	-3.75106	-1.98735	-4.22428	-5.39204	-2.78937	-4.13523	-1.09089	-4.85168	-4.51246	-3.48501	-7.22732	-6.89234	-5.35106	-6.49024
	208.2	-3.3819	0.333946	-2.05385	-1.7006	0.125901	-3.57463	-1.72436	-4.20753	-5.36424	-2.54931	-4.04036	-1.16078	-5.11486	-4.4439	-3.57318	-7.13808	-6.8134	-5.231	-6.39416
	208.1	-3.43057	0.290235	-1.69753	-1.61262	0.618304	-3.36016	-1.37093	-4.26063	-5.46868	-2.6	-4.10977	-1.2155	-5.1215	-4.41633	-3.58444	-7.00174	-6.59031	-5.15387	-6.24864
	208	-3.45425	0.218979	-1.1319	-1.45572	1.09717	-3.4702	-1.18651	-4.2025	-5.63512	-2.58143	-4.13968	-1.2449	-5.17648	-4.33915	-3.58684	-6.79431	-6.34616	-5.11082	-6.08376
	207.9	-3.30883	0.109492	-0.483782	-1.22771	1.56432	-3.23747	-0.836575	-4.17004	-5.65238	-2.39966	-4.07403	-1.26184	-5.21842	-4.32678	-3.60235	-6.52686	-6.11621	-4.98446	-5.87584
	207.8	-3.32649	0.370012	0.07583	-0.960216	2.22211	-2.61469	-0.19629	-4.04633	-5.61935	-2.05746	-3.90771	-1.23558	-5.32137	-4.44191	-3.66629	-6.30354	-5.82394	-4.85637	-5.66128
	207.7	-3.42923	0.866138	0.476338	-0.695585	2.62528	-1.99684	0.31422	-3.77785	-5.60176	-1.79282	-3.72414	-1.21691	-5.38334	-4.55802	-3.71942	-6.05177	-5.48366	-4.7531	-5.42951
	207.6	-3.33988	1.07634	0.725459	-0.512694	2.68583	-1.37999	0.65292	-3.50901	-5.4445	-1.64747	-3.53366	-1.38348	-5.43698	-4.63549	-3.81865	-5.77197	-5.0956	-4.65584	-5.17447
	207.5	-2.94006	1.26842	0.950163	-0.240492	3.21482	-0.864521	1.17515	-3.24662	-5.22183	-1.56145	-3.3433	-1.57117	-5.45262	-4.71853	-3.91411	-5.3484	-4.90932	-4.43945	-4.89906
	207.4	-2.49984	1.5082	1.17517	0.0611767	3.71556	-0.418863	1.64835	-3.0735	-5.04731	-1.53884	-3.21988	-1.6081	-5.77562	-4.86399	-4.08257	-4.87209	-4.6715	-4.33178	-4.62512
	207.3	-2.08628	1.55417	1.39272	0.28687	3.95389	0.00224352	1.97807	-2.88312	-5.00374	-1.56426	-3.15037	-1.37972	-6.1051	-5.10468	-4.1965	-4.58108	-4.49832	-4.3464	-4.47527
	207.2	-1.51911	1.59892	1.38133	0.487047	3.75959	0.365221	2.06241	-2.80927	-4.72393	-1.50166	-3.01162	-1.09747	-6.29606	-5.12341	-4.17231	-4.61482	-3.98672	-4.24219	-4.28124
	207.1	-0.945364	1.65722	1.17082	0.627559	3.485	0.99251	2.23875	-2.64266	-3.97753	-1.37075	-2.66365	-0.829684	-6.42519	-5.16701	-4.14063	-4.56136	-3.2773	-4.24329	-4.02732
	207	-0.355411	1.70765	0.950123	0.767454	3.02354	0.806932	1.91524	-2.5997	-3.71524	-1.56079	-2.62524	-0.730475	-6.15194	-4.86241	-3.91494	-4.37162	-2.9466	-4.07236	-3.79686
	206.9	0.110074	1.73154	0.919645	0.92042	2.5914	0.779	1.6852	-2.56598	-3.63055	-1.468	-2.55484	-0.904797	-5.97715	-4.61623	-3.83273	-3.99933	-2.53479	-3.61547	-3.3832
	206.8	0.300164	1.95348	0.816343	1.02333	1.91396	0.832547	1.37325	-2.43994	-3.86922	-1.08207	-2.46374	-0.944557	-6.11304	-4.32898	-3.79553	-3.63802	-2.60395	-3.16658	-3.13618
	206.7	0.409354	1.94946	0.81334	1.05738	1.52391	1.35448	1.4392	-2.28203	-4.6318	-0.605589	-2.50647	-0.79953	-6.08114	-4.08419	-3.65495	-3.36118	-2.77967	-2.83612	-2.99232
	206.6	0.523925	1.91598	1.00561	1.14851	1.21267	1.88047	1.54657	-2.13417	-4.5852	-0.357222	-2.35886	-0.565364	-5.89463	-4.00724	-3.48908	-3.07896	-3.19899	-2.44315	-2.90703
	206.5	0.854517	2.02555	1.34411	1.40806	1.73858	2.14072	1.93965	-2.05266	-4.06097	-0.570565	-2.22807	-0.412244	-5.24867	-3.95208	-3.20433	-2.91216	-2.76824	-2.26243	-2.64761
	206.4	1.30903	2.35464	1.70274	1.7888	2.58489	2.91593	2.75041	-1.75843	-3.49691	-0.915259	-2.05687	-0.343768	-4.55205	-3.82572	-2.90718	-2.65056	-2.93633	-1.89468	-2.49386
	206.3	1.75892	2.22996	1.84474	1.94454	3.46062	2.76146	3.11104	-1.21907	-3.23738	-1.17406	-1.87684	0.0482758	-4.41736	-3.70636	-2.69181	-2.387	-2.66004	-1.7611	-2.26938
	206.2	1.90705	2.23437	2.0594	2.06694	4.74622	2.12318	3.4347	-1.12937	-2.55863	-1.62823	-1.77208	0.048291	-3.75224	-3.69423	-2.46606	-2.15428	-2.3438	-1.96221	-2.15343
	206.1	1.93931	2.61375	2.26397	2.27234	6.45395	2.19907	4.32651	-1.07809	-2.41332	-1.71161	-1.73434	0.0898346	-3.46087	-3.61102	-2.32735	-2.20276	-2.31976	-2.46434	-2.32895
	206	2.43893	3.14485	2.40602	2.66327	7.55369	2.42435	4.98902	-0.666997	-2.58853	-1.77648	-1.67734	0.335124	-3.10319	-3.62049	-2.12952	-2.28848	-2.60809	-2.80901	-2.56853
	205.9	2.81703	3.85591	2.83237	3.16844	7.7253	2.66422	5.19476	-0.24978	-2.04001	-1.19488	-1.16156	-0.329289	-3.14366	-3.64638	-2.37311	-2.28563	-2.34455	-3.10842	-2.57953
	205.8	3.16837	4.4343	3.52049	3.70772	8.15505	3.73872	5.94688	0.291168	-0.23206	-0.435336	-0.125409	-0.755655	-2.96521	-3.42476	-2.38187	-1.95059	-1.74139	-3.05085	-2.24761
	205.7	3.73294	4.80504	4.11337	4.21712	7.83852	5.3732	6.60586	0.819466	1.35215	0.450654	0.87409	-0.517964	-2.39242	-2.95841	-1.95626	-1.55659	-1.55448	-2.74648	-1.95252
	205.6	4.3973	5.04374	4.63071	4.69058	8.68909	6.1148	7.40194	1.60901	1.2335	0.880548	1.24102	-0.254178	-1.2174	-2.44504	-1.30554	-1.0202	-1.83165	-2.6318	-1.82788
	205.5	5.23105	5.12309	4.99636	5.11683	9.93846	6.54052	8.23949	2.20282	1.05497	1.35318	1.53699	0.111353	1.90561	-1.87466	0.0474343	-0.779478	-2.71358	-2.74775	-2.08027
	205.4	5.88616	5.14933	5.28622	5.44057	11.1286	6.56401	8.84631	2.82365	0.939954	2.61899	2.12753	1.24871	2.16176	-0.489899	0.973524	-0.787723	-3.54165	-2.80281	-2.37739
	205.3	6.27367	5.25797	5.66048	5.73071	12.1019	6.04322	9.07256	3.74262	1.73387	3.85834	3.11161	2.91544	2.13472	0.762637	1.9376	-0.356705	-2.11432	-2.79493	-1.75532
	205.2	6.73848	5.41434	6.28614	6.14632	12.0642	6.3863	9.22525	4.58292	4.52041	5.12919	4.74417	3.99107	3.03295	1.93171	2.98524	0.418906	-1.47879	-3.0552	-1.37169
	205.1	7.12357	5.516	6.81765	6.48574	13.9826	9.37865	11.6806	5.16132	6.32634	5.68962	5.72576	3.86497	5.76688	3.0075	4.21312	0.851205	-2.36638	-4.03054	-1.84857
	205	7.53884	5.5875	7.29174	6.80603	14.6524	13.7057	14.1791	5.47624	9.7197	6.08994	7.09529	3.8047	8.17784	2.80744	4.92999	0.944415	-2.1266	-4.10876	-1.76365
	204.9	8.04813	5.71473	7.64088	7.13458	15.2883	16.9616	16.1249	5.56072	11.99	7.24341	8.26471	5.39905	9.34151	3.46864	6.06973	1.58603	-1.98591	-4.66403	-1.68797
	204.8	8.50314	5.73627	7.86025	7.36655	15.7335	18.0219	16.8777	5.90488	10.6299	9.90074	8.81184	8.14661	10.7556	4.36725	7.75649	3.2686	-0.483153	-5.06425	-0.759601
	204.7	8.9387	6.4879	8.29482	7.90714	15.6322	20.2416	17.9369	5.49	8.94284	10.8051	8.41265	9.32592	11.3975	4.26705	8.33016	3.68367	2.02529	-4.29533	0.47121
	204.6	9.43738	7.37226	9.02588	8.61184	14.4936	21.8504	18.172	5.61661	9.96642	12.0483	9.21044	8.01504	13.5437	4.24372	8.60082	4.3629	5.97034	-1.83475	2.83283
	204.5	10.2443	8.14948	10.0469	9.48023	13.3078	23.1553	18.2315	6.14395	11.5076	13.05	10.2339	8.20803	16.544	5.04521	9.93241	6.79879	7.73446	0.958868	5.16404
	204.4	11.2961	8.10277	10.8016	10.0668	11.3921	22.6439	17.018	6.34244	10.9733	14.5953	10.637	10.743	20.8453	6.95154	12.8466	6.94764	6.22552	2.58989	5.25435
	204.3	12.4363	8.26343	11.0675	10.5891	11.8005	21.6671	16.7338	6.16092	9.23474	14.702	10.0326	13.5485	23.2009	5.83526	14.1949	6.17708	3.80721	3.19302	4.39244
	204.2	13.539	8.38994	11.6086	11.1792	12.5561	19.6247	16.0904	6.98394	9.29446	17.3517	11.21	16.6462	27.2727	5.30721	16.4087	6.63492	0.185379	2.56413	3.12814
	204.1	14.3768	8.30967	12.2996	11.662	13.2733	18.3118	15.7926	8.04564	9.17305	19.2905	12.1697	17.7418	30.8654	5.71249	18.1066	5.30747	-3.13031	0.186156	0.787772
	204	15.1305	8.31888	13.0434	12.1643	12.4253	18.6475	15.5364	7.99816	9.29214	21.2669	12.8524	18.798	32.5419	6.40664	19.2488	3.57497	-8.12701	-0.657853	-1.73663
	203.9	15.6155	8.31841	14.2669	12.7336	14.1262	18.8864	16.5063	7.90189	9.81399	21.8746	13.1968	19.4871	32.2604	6.76216	19.5032	3.65474	-10.5399	-1.37937	-2.75484
	203.8	16.21	8.51992	15.3322	13.354	15.8736	17.3298	16.6017	7.07966	9.99814	20.5049	12.5276	22.8996	32.5637	7.84031	21.1012	4.01346	-13.8947	-1.49024	-3.79049
	203.7	16.6943	9.16042	16.3132	14.056	18.3133	16.1731	17.2432	8.06152	9.01887	18.6424	11.9076	27.7435	31.6919	7.63162	22.3557	3.88329	-19.0474	-2.60458	-5.9229
	203.6	17.199	9.86736	17.1373	14.7346	19.7902	15.0535	17.4218	7.91301	5.80308	17.3492	10.3551	33.9462	31.3141	8.30867	24.523	4.55994	-24.226	-5.41837	-8.36148
	203.5	17.7133	11.0792	17.7763	15.5229	22.032	14.5652	18.2986	4.51622	4.05577	15.8658	8.14593	37.9313	34.8287	8.82329	27.1944	6.062	-25.3948	-9.43715	-9.58998
	203.4	18.3751	12.2674	18.458	16.3668	23.9573	12.1696	18.0634	0.799754	5.85516	14.9933	7.21607	38.0504	40.6856	8.66752	29.1345	6.63989	-25.9719	-13.4975	-10.9432
	203.3	18.8688	13.2106	19.6059	17.2284	24.1962	11.7506	17.9734	-1.66478	6.6485	15.109	6.69757	40.75	46.0584	8.52558	31.778	9.53667	-26.9762	-15.2491	-10.8962
	203.2	19.3019	14.413	20.8172	18.1774	24.9118	11.6262	18.269	-3.46483	8.39211	15.1568	6.69469	41.3114	50.282	8.10915	33.2342	12.0536	-28.6705	-15.5214	-10.7128
	203.1	19.5821	15.1646	21.8936	18.8801	26.3519	10.7633	18.5576	-5.04844	12.4876	14.9482	7.46245	43.2407	52.4487	7.17715	34.2888	13.0023	-28.6882	-16.1221	-10.6027
	203	19.86	16.1801	23.1019	19.714	26.3832	10.4559	18.4196	-6.35976	9.38444	15.8058	6.27683	44.7647	53.7289	7.02655	35.1734	14.7547	-29.685	-16.3097	-10.4133
	202.9	20.4515	16.9134	24.0367	20.4672	27.0604	10.7042	18.8823	-5.76613	8.46935	16.7493	6.48417	44.6135	56.9975	8.8554	36.8221	14.6479	-33.8006	-13.4581	-10.8703
	202.8	21.1244	17.5535	25.0357	21.2379	27.3034	9.66535	18.4844	-5.23378	7.85206	17.1323	6.58353	45.4786	60.1618	11.3267	38.989	14.5884	-38.3188	-10.8458	-11.5254
	202.7	21.7552	17.8696	26.2273	21.9507	27.2102	7.83475	17.5225	-4.12473	5.87435	18.7445	6.83137	46.1615	61.8066	13.3221	40.4301	13.2751	-39.8713	-9.11266	-11.903
	202.6	22.5625	17.713	27.081	22.4522	26.7679	5.75189	16.2599	-4.68965	4.37408	20.7091	6.79784	47.6135	65.2927	14.3132	42.4065	12.7349	-38.7122	-9.55913	-11.8455
	202.5	23.1819	17.3966	27.7093	22.7626	27.7286	2.31861	15.0236	-5.10519	-1.209	22.7949	5.49357	50.1574	70.4274	13.6017	44.7288	11.2138	-38.7263	-9.05623	-12.1896
	202.4	23.2412	17.6518	28.3046	23.0659	25.4872	-2.27336	11.6069	-4.38615	-7.95693	23.2361	3.63101	52.2548	70.5937	12.4449	45.0978	10.4262	-39.9743	-10.909	-13.4857
	202.3	23.26	18.0147	28.8631	23.3793	22.4997	-4.52247	8.98861	-2.6054	-13.1629	21.3143	1.84867	53.6081	70.2267	13.1883	45.6744	10.7007	-41.2812	-11.1223	-13.9009
	202.2	23.4614	18.7459	29.7758	23.9944	20.6032	-6.46174	7.07073	0.000792027	-16.6797	19.1442	0.821764	52.5126	70.7045	13.4549	45.5573	11.852	-39.5421	-10.5942	-12.7614
	202.1	24.2638	19.8878	30.5459	24.8992	19.8554	-7.20758	6.32391	2.19297	-19.1792	16.5599	-0.14211	50.9629	70.6031	13.7067	45.0909	15.4758	-35.8704	-8.49968	-9.63143
	202	25.414	21.4767	31.2626	26.0511	19.2225	-5.67096	6.77577	5.16304	-18.9503	13.8454	0.01938	53.0526	72.4669	13.7139	46.4111	17.3015	-34.7703	-6.62485	-8.03122
	201.9	26.2652	23.0184	32.2195	27.1677	17.9883	-3.58722	7.20054	9.22056	-19.7422	10.613	0.0304533	55.7467	71.7454	15.2513	47.5811	19.9384	-32.3508	-4.62141	-5.67794
	201.8	26.9377	24.4648	33.0026	28.135	13.868	-6.65979	3.60411	11.1791	-18.1323	6.07945	-0.29125	57.7663	68.8761	15.7635	47.4686	22.0402	-25.5991	-3.47938	-2.34609
	201.7	28.0475	24.6437	33.2872	28.6595	12.8251	-10.8521	0.9865	12.4561	-16.5318	2.91224	-0.38782	58.7371	63.0289	15.046	45.604	22.9033	-23.1541	-3.45411	-1.23497
	201.6	28.7233	24.5767	33.6504	28.9835	12.3343	-16.9452	-2.30545	12.1465	-17.1862	0.0157434	-1.67465	59.3322	58.3517	12.7302	43.4714	23.8614	-19.5325	-3.18219	0.382237
	201.5	29.1173	25.0833	34.5778	29.5928	11.8898	-20.0461	-4.07815	11.5463	-15.3433	-2.38557	-2.06086	56.7831	55.1482	8.89892	40.2767	23.2759	-18.8177	-2.38041	0.692597
	201.4	29.6196	26.0597	35.0127	30.2307	10.7983	-24.0918	-6.64675	12.9623	-13.7219	-2.99239	-1.25066	55.5774	50.477	6.12663	37.3937	22.4607	-20.5725	-1.25116	0.212347
	201.3	29.9516	27.2402	35.4257	30.8725	11.5179	-26.3738	-7.42795	14.5555	-11.609	-2.05346	0.29768	56.4602	46.3249	6.30148	36.3622	21.7147	-23.2317	-1.65325	-1.05675
	201.2	30.1519	28.794	35.217	31.3876	13.152	-28.6836	-7.7658	15.0236	-9.36984	-2.50808	1.04856	58.3714	44.9697	5.72292	36.3547	18.7592	-27.0436	-4.52353	-4.26931
	201.1	30.065	29.9626	35.5674	31.865	13.9182	-30.0653	-8.07355	12.7365	-4.03947	-4.2647	1.47744	56.2618	45.5343	3.78744	35.1945	16.1529	-27.8057	-5.45064	-5.70115
	201	29.7538	30.3854	36.7007	32.28	13.7777	-28.3645	-7.2934	12.154	2.47196	-3.84034	3.59521	53.5038	45.6573	3.12811	34.0964	15.9852	-25.6588	-4.62428	-4.76596
	200.9	29.4909	31.5496	37.6353	32.8919	11.0987	-23.1815	-6.0414	8.28974	7.14222	-5.47663	3.31844	51.7151	41.4	3.39788	32.171	15.0028	-19.6036	-2.47113	-2.35731
	200.8	28.879	32.5695	38.3719	33.2735	9.48284	-17.8084	-4.16278	3.82706	9.06497	-7.37447	1.83919	51.1604	34.8317	2.91135	29.6345	12.3286	-10.7254	2.12858	1.24393
	200.7	28.6283	33.6646	39.0654	33.7861	10.8415	-14.9303	-2.0444	1.28637	11.1999	-7.75754	1.57624	51.4043	30.3148	2.1345	27.9512	11.4149	-3.82676	5.79002	4.45939
	200.6	28.8328	34.8399	40.3262	34.6663	10.4554	-13.5268	-1.5357	0.222567	12.5699	-9.55913	1.07778	49.8209	28.2871	1.03121	26.3797	8.80824	0.988562	7.83797	5.87826
	200.5	29.1539	35.8192	41.2579	35.4103	9.73902	-12.3776	-1.31929	2.61275	12.6171	-6.87048	2.78646	48.2756	27.9879	0.456967	25.5735	6.29706	6.66144	10.4452	7.80123
	200.4	29.8264	37.1828	42.1032	36.3708	8.65361	-10.0008	-0.673595	4.03292	15.8694	-4.2035	5.23294	43.1279	26.1629	0.344904	23.2119	5.26371	14.7447	12.695	10.9011
	200.3	30.205	38.8184	43.2837	37.4357	9.14829	-7.97802	0.585135	5.36834	17.6949	-1.42578	7.21249	35.9264	21.4851	1.44589	19.6191	4.07719	23.3741	14.1303	13.8605
	200.2	31.8379	39.4926	44.3651	38.5652	8.06467	-5.70914	1.17776	9.18912	20.2201	1.11596	10.1751	28.2021	15.2796	4.22088	15.9009	2.07557	27.4578	17.1335	15.5556
	200.1	32.2912	40.3019	44.8238	39.139	5.95832	-2.03362	1.96235	13.5134	21.2422	2.36279	12.3728	22.3341	6.8726	6.84625	12.0176	1.61107	30.8804	21.2616	17.9177
	200	32.7387	41.0237	44.4547	39.4057	4.87756	-1.38433	1.74661	15.9541	22.087	3.84433	13.9618	17.2646	0.929523	9.6029	9.26567	-0.228078	30.0605	24.436	18.0895
