# Supplementary material for: Cross-talk between individual phenol-soluble modulins in Staphylococcus aureus biofilm enables rapid and efficient amyloid formation
Source: eLife. 2020 Dec 1;9:e59776. doi: 10.7554/eLife.59776 (PMC7732344; doi:10.7554/eLife.59776)
Supplement: Figure 2—figure supplement 2—source data 1. [file elife-59776-fig2-figsupp2-data1.xlsx]

## Sheet: Sup. Fig. 5a
PSMα1
	Wavenumber (cm-1)	Spectra	Spectra (normalized)	Fit	Fit (normalized)	Peak 1	Peak 1 (normalized)	Peak 2	Peak 2 (normalized)	Peak 3	Peak 3 (normalized)
	1700.07	0.00137	0.00809741	0.00481	0.0284296	0.0027	0.0159584	0.0016	0.00945682	0.0005	0.00295526
	1699.11	0.00275	0.0162539	0.00498	0.0294344	0.00277	0.0163721	0.00167	0.00987056	0.00053	0.00313257
	1698.15	0.00354	0.0209232	0.00515	0.0304392	0.00285	0.016845	0.00174	0.0102843	0.00057	0.00336899
	1697.18	0.0028	0.0165494	0.00534	0.0315621	0.00292	0.0172587	0.00182	0.0107571	0.0006	0.00354631
	1696.22	0.00162	0.00957503	0.00554	0.0327443	0.003	0.0177315	0.0019	0.01123	0.00064	0.00378273
	1695.25	0.00372	0.0219871	0.00576	0.0340446	0.00309	0.0182635	0.00198	0.0117028	0.00069	0.00407826
	1694.29	0.00295	0.017436	0.00599	0.035404	0.00318	0.0187954	0.00207	0.0122348	0.00074	0.00437378
	1693.32	0.0022	0.0130031	0.00623	0.0368225	0.00327	0.0193274	0.00217	0.0128258	0.00079	0.00466931
	1692.36	0.0032	0.0189136	0.00649	0.0383592	0.00336	0.0198593	0.00228	0.013476	0.00085	0.00502394
	1691.39	0.00104	0.00614694	0.00677	0.0400142	0.00346	0.0204504	0.00239	0.0141261	0.00092	0.00543767
	1690.43	0.00391	0.0231101	0.00707	0.0417873	0.00357	0.0211005	0.00251	0.0148354	0.001	0.00591051
	1689.47	0.00291	0.0171996	0.00739	0.0436787	0.00367	0.0216916	0.00264	0.0156038	0.00108	0.00638336
	1688.5	0.00205	0.0121166	0.00774	0.0457474	0.00379	0.0224009	0.00278	0.0164312	0.00118	0.00697441
	1687.54	0.00122	0.00721083	0.00812	0.0479934	0.00391	0.0231101	0.00293	0.0173178	0.00129	0.00762456
	1686.57	0.00027	0.00159584	0.00854	0.0504758	0.00403	0.0238194	0.00309	0.0182635	0.00141	0.00833383
	1685.61	0.00094	0.00555588	0.00899	0.0531355	0.00416	0.0245877	0.00327	0.0193274	0.00156	0.0092204
	1684.64	0.00238	0.014067	0.00948	0.0560317	0.0043	0.0254152	0.00346	0.0204504	0.00172	0.0101661
	1683.68	0.00362	0.0213961	0.01003	0.0592825	0.00444	0.0262427	0.00367	0.0216916	0.00192	0.0113482
	1682.72	0.00452	0.0267155	0.01064	0.0628879	0.00459	0.0271293	0.0039	0.023051	0.00215	0.0127076
	1681.75	0.00558	0.0329807	0.01132	0.066907	0.00475	0.0280749	0.00415	0.0245286	0.00241	0.0142443
	1680.79	0.00734	0.0433832	0.01208	0.071399	0.00492	0.0290797	0.00443	0.0261836	0.00274	0.0161948
	1679.82	0.00972	0.0574502	0.01295	0.0765412	0.0051	0.0301436	0.00473	0.0279567	0.00312	0.0184408
	1678.86	0.01212	0.0716354	0.01393	0.0823335	0.00528	0.0312075	0.00506	0.0299072	0.00359	0.0212187
	1677.89	0.014	0.0827472	0.01507	0.0890715	0.00548	0.0323896	0.00542	0.032035	0.00417	0.0246468
	1676.93	0.01559	0.0921449	0.0164	0.0969324	0.00568	0.0335717	0.00583	0.0344583	0.00489	0.0289024
	1675.97	0.01794	0.106035	0.01796	0.106153	0.0059	0.034872	0.00628	0.037118	0.00579	0.0342219
	1675	0.02172	0.128376	0.01983	0.117206	0.00613	0.0362315	0.00678	0.0400733	0.00692	0.0409008
	1674.04	0.02621	0.154915	0.02208	0.130504	0.00638	0.0377091	0.00734	0.0433832	0.00836	0.0494119
	1673.07	0.03026	0.178852	0.0248	0.146581	0.00664	0.0392458	0.00796	0.0470477	0.0102	0.0602873
	1672.11	0.03354	0.198239	0.0281	0.166085	0.00691	0.0408417	0.00867	0.0512442	0.01252	0.0739996
	1671.14	0.03624	0.214197	0.03203	0.189314	0.0072	0.0425557	0.00946	0.0559135	0.01536	0.0907855
	1670.18	0.03873	0.228914	0.0365	0.215734	0.00752	0.0444471	0.01036	0.0612329	0.01862	0.110054
	1669.22	0.04103	0.242508	0.0411	0.242922	0.00785	0.0463975	0.01138	0.0672617	0.02187	0.129263
	1668.25	0.04288	0.253443	0.04505	0.266269	0.0082	0.0484662	0.01253	0.0740588	0.02432	0.143744
	1667.29	0.04427	0.261658	0.04748	0.280631	0.00858	0.0507122	0.01385	0.0818606	0.02506	0.148118
	1666.32	0.04548	0.26881	0.04809	0.284237	0.00898	0.0530764	0.01535	0.0907264	0.02376	0.140434
	1665.36	0.04658	0.275312	0.04745	0.280454	0.00941	0.0556179	0.01706	0.100833	0.02098	0.124003
	1664.39	0.04752	0.280868	0.04655	0.275134	0.00988	0.0583959	0.01901	0.112359	0.01766	0.10438
	1663.43	0.04848	0.286542	0.0461	0.272475	0.01038	0.0613511	0.02123	0.12548	0.0145	0.0857025
	1662.47	0.04968	0.293634	0.04644	0.274484	0.01091	0.0644837	0.02373	0.140257	0.0118	0.0697441
	1661.5	0.05128	0.303091	0.04764	0.281577	0.01149	0.0679118	0.02652	0.156747	0.00963	0.0569183
	1660.54	0.05337	0.315444	0.04962	0.29328	0.01211	0.0715763	0.0296	0.174951	0.00791	0.0467522
	1659.57	0.05586	0.330161	0.05225	0.308824	0.01278	0.0755364	0.0329	0.194456	0.00657	0.0388321
	1658.61	0.05841	0.345233	0.05536	0.327206	0.01351	0.0798511	0.03634	0.214788	0.00551	0.0325669
	1657.64	0.06066	0.358532	0.0587	0.346947	0.0143	0.0845204	0.03973	0.234825	0.00467	0.0276021
	1656.68	0.06237	0.368639	0.06199	0.366393	0.01516	0.0896034	0.04283	0.253147	0.00399	0.023583
	1655.72	0.06373	0.376677	0.06491	0.383652	0.0161	0.0951593	0.04536	0.268101	0.00345	0.0203913
	1654.75	0.06521	0.385425	0.06715	0.396891	0.01712	0.101188	0.04702	0.277912	0.003	0.0177315
	1653.79	0.06636	0.392222	0.06847	0.404693	0.01824	0.107808	0.04759	0.281281	0.00264	0.0156038
	1652.82	0.06614	0.390921	0.0688	0.406643	0.01947	0.115078	0.04699	0.277735	0.00233	0.0137715
	1651.86	0.06488	0.383474	0.0682	0.403097	0.02082	0.123057	0.0453	0.267746	0.00208	0.0122939
	1650.89	0.06389	0.377623	0.06692	0.395532	0.02231	0.131864	0.04276	0.252734	0.00186	0.0109936
	1649.93	0.06343	0.374904	0.06527	0.385779	0.02395	0.141557	0.03964	0.234293	0.00167	0.00987056
	1648.97	0.06312	0.373072	0.06353	0.375495	0.02578	0.152373	0.03625	0.214256	0.00151	0.00892488
	1648	0.063	0.372362	0.06198	0.366334	0.0278	0.164312	0.03281	0.193924	0.00137	0.00809741
	1647.04	0.06326	0.373899	0.06081	0.359418	0.03005	0.177611	0.02951	0.174419	0.00125	0.00738814
	1646.07	0.06393	0.377859	0.06015	0.355517	0.03256	0.192446	0.02644	0.156274	0.00115	0.00679709
	1645.11	0.06503	0.384361	0.06008	0.355104	0.03537	0.209055	0.02366	0.139843	0.00105	0.00620604
	1644.14	0.06655	0.393345	0.06065	0.358473	0.03852	0.227673	0.02116	0.125066	0.00097	0.0057332
	1643.18	0.06808	0.402388	0.06191	0.36592	0.04206	0.248596	0.01896	0.112063	0.0009	0.00531946
	1642.22	0.06918	0.408889	0.06389	0.377623	0.04604	0.27212	0.01701	0.100538	0.00083	0.00490573
	1641.25	0.06988	0.413027	0.06662	0.393758	0.05053	0.298658	0.01531	0.09049	0.00078	0.0046102
	1640.29	0.07081	0.418524	0.07013	0.414504	0.0556	0.328625	0.01381	0.0816242	0.00072	0.00425557
	1639.32	0.07277	0.430108	0.07449	0.440274	0.06131	0.362374	0.0125	0.0738814	0.00068	0.00401915
	1638.36	0.0763	0.450972	0.07973	0.471245	0.06775	0.400437	0.01135	0.0670843	0.00063	0.00372362
	1637.39	0.08176	0.483244	0.0859	0.507713	0.07497	0.443111	0.01033	0.0610556	0.00059	0.0034872
	1636.43	0.08932	0.527927	0.09303	0.549855	0.08303	0.49075	0.00944	0.0557953	0.00056	0.00330989
	1635.47	0.09883	0.584136	0.10111	0.597612	0.09194	0.543413	0.00865	0.051126	0.00053	0.00313257
	1634.5	0.10923	0.645606	0.1101	0.650748	0.10166	0.600863	0.00795	0.0469886	0.0005	0.00295526
	1633.54	0.11969	0.70743	0.11985	0.708375	0.11206	0.662332	0.00732	0.043265	0.00047	0.00277794
	1632.57	0.13051	0.771381	0.13008	0.76884	0.12288	0.726284	0.00676	0.0399551	0.00044	0.00260063
	1631.61	0.14174	0.837756	0.14038	0.829718	0.13369	0.790177	0.00627	0.0370589	0.00042	0.00248242
	1630.64	0.1525	0.901354	0.15013	0.887346	0.14391	0.850582	0.00582	0.0343992	0.0004	0.00236421
	1629.68	0.16146	0.954312	0.15859	0.937349	0.15279	0.903068	0.00541	0.0319759	0.00038	0.002246
	1628.71	0.16728	0.988711	0.16495	0.974939	0.15954	0.942964	0.00505	0.0298481	0.00036	0.00212779
	1627.75	0.16919	1	0.1685	0.995922	0.16344	0.966015	0.00472	0.0278976	0.00034	0.00200958
	1626.79	0.16745	0.989716	0.16878	0.997577	0.16403	0.969502	0.00442	0.0261245	0.00033	0.00195047
	1625.82	0.16299	0.963355	0.16571	0.979431	0.16126	0.95313	0.00414	0.0244695	0.00031	0.00183226
	1624.86	0.1565	0.924996	0.15963	0.943495	0.15544	0.91873	0.00389	0.0229919	0.0003	0.00177315
	1623.89	0.14845	0.877416	0.15116	0.893433	0.14721	0.870087	0.00367	0.0216916	0.00029	0.00171405
	1622.93	0.13935	0.82363	0.1411	0.833974	0.13737	0.811927	0.00346	0.0204504	0.00027	0.00159584
	1621.96	0.12964	0.766239	0.13021	0.769608	0.12669	0.748803	0.00327	0.0193274	0.00026	0.00153673
	1621	0.11974	0.707725	0.11915	0.704238	0.11581	0.684497	0.00309	0.0182635	0.00025	0.00147763
	1620.04	0.11021	0.651398	0.1084	0.6407	0.10523	0.621963	0.00293	0.0173178	0.00024	0.00141852
	1619.07	0.10144	0.599563	0.09826	0.580767	0.09525	0.562977	0.00277	0.0163721	0.00023	0.00135942
	1618.11	0.0931	0.550269	0.08891	0.525504	0.08605	0.5086	0.00263	0.0155447	0.00022	0.00130031
	1617.14	0.08438	0.498729	0.08041	0.475264	0.07769	0.459188	0.00251	0.0148354	0.00022	0.00130031
	1616.18	0.0754	0.445653	0.07277	0.430108	0.07018	0.4148	0.00238	0.014067	0.00021	0.00124121
	1615.21	0.06732	0.397896	0.06595	0.389798	0.06348	0.375199	0.00227	0.0134169	0.0002	0.0011821
	1614.25	0.06051	0.357645	0.05988	0.353922	0.05752	0.339973	0.00217	0.0128258	0.00019	0.001123
	1613.29	0.05466	0.323069	0.05449	0.322064	0.05224	0.308765	0.00207	0.0122348	0.00019	0.001123
	1612.32	0.04958	0.293043	0.04971	0.293812	0.04755	0.281045	0.00198	0.0117028	0.00018	0.00106389
	1611.36	0.04503	0.26615	0.04546	0.268692	0.0434	0.256516	0.00189	0.0111709	0.00017	0.00100479
	1610.39	0.04087	0.241563	0.04169	0.246409	0.03971	0.234707	0.00181	0.010698	0.00017	0.00100479
	1609.43	0.03725	0.220167	0.03833	0.22655	0.03643	0.21532	0.00174	0.0102843	0.00016	0.000945682
	1608.46	0.03416	0.201903	0.03533	0.208818	0.0335	0.198002	0.00167	0.00987056	0.00016	0.000945682
	1607.5	0.03133	0.185176	0.03265	0.192978	0.03089	0.182576	0.0016	0.00945682	0.00015	0.000886577
	1606.54	0.02877	0.170046	0.03024	0.178734	0.02856	0.168804	0.00154	0.00910219	0.00015	0.000886577
	1605.57	0.02665	0.157515	0.02808	0.165967	0.02646	0.156392	0.00148	0.00874756	0.00014	0.000827472
	1604.61	0.02483	0.146758	0.02613	0.154442	0.02457	0.145221	0.00142	0.00839293	0.00014	0.000827472
	1603.64	0.023	0.135942	0.02437	0.144039	0.02287	0.135173	0.00137	0.00809741	0.00013	0.000768367
	1602.68	0.02122	0.125421	0.02278	0.134642	0.02133	0.126071	0.00132	0.00780188	0.00013	0.000768367
	1601.71	0.01981	0.117087	0.02133	0.126071	0.01993	0.117797	0.00127	0.00750635	0.00013	0.000768367
	1600.75	0.01885	0.111413	0.02001	0.118269	0.01866	0.11029	0.00123	0.00726993	0.00012	0.000709262
	1599.79	0.01826	0.107926	0.01881	0.111177	0.0175	0.103434	0.00119	0.00703351	0.00012	0.000709262

## Sheet: Sup. Fig. 5b
PSMα3
	Wavenumber (cm-1)	Spectra	Spectra (normalized)	Fit	Fit (normalized)	Peak 1	Peak 1 (normalized)	Peak 2	Peak 2 (normalized)
	1700.07	0	0	0.18482	0.09241	0.01853	0.009265	0.16121	0.080605
	1699.11	0.01718	0.00859	0.19166	0.09583	0.01908	0.00954	0.1674	0.0837
	1698.15	0.0359	0.01795	0.19887	0.099435	0.01965	0.009825	0.17394	0.08697
	1697.18	0.05777	0.028885	0.2065	0.10325	0.02025	0.010125	0.18086	0.09043
	1696.22	0.08357	0.041785	0.21455	0.107275	0.02088	0.01044	0.18819	0.094095
	1695.25	0.11194	0.05597	0.22308	0.11154	0.02153	0.010765	0.19595	0.097975
	1694.29	0.14031	0.070155	0.23211	0.116055	0.02222	0.01111	0.20419	0.102095
	1693.32	0.16714	0.08357	0.24168	0.12084	0.02294	0.01147	0.21292	0.10646
	1692.36	0.19258	0.09629	0.25184	0.12592	0.02369	0.011845	0.22221	0.111105
	1691.39	0.21721	0.108605	0.26263	0.131315	0.02448	0.01224	0.23208	0.11604
	1690.43	0.24174	0.12087	0.2741	0.13705	0.02531	0.012655	0.2426	0.1213
	1689.47	0.26655	0.133275	0.2863	0.14315	0.02618	0.01309	0.2538	0.1269
	1688.5	0.29158	0.14579	0.29931	0.149655	0.0271	0.01355	0.26575	0.132875
	1687.54	0.31679	0.158395	0.31318	0.15659	0.02806	0.01403	0.27852	0.13926
	1686.57	0.34272	0.17136	0.32799	0.163995	0.02908	0.01454	0.29217	0.146085
	1685.61	0.3701	0.18505	0.34381	0.171905	0.03015	0.015075	0.30677	0.153385
	1684.64	0.39874	0.19937	0.36074	0.18037	0.03128	0.01564	0.32242	0.16121
	1683.68	0.42715	0.213575	0.37888	0.18944	0.03248	0.01624	0.33921	0.169605
	1682.72	0.45349	0.226745	0.39832	0.19916	0.03374	0.01687	0.35723	0.178615
	1681.75	0.47712	0.23856	0.4192	0.2096	0.03508	0.01754	0.37659	0.188295
	1680.79	0.49837	0.249185	0.44162	0.22081	0.03649	0.018245	0.39743	0.198715
	1679.82	0.51803	0.259015	0.46573	0.232865	0.03799	0.018995	0.41986	0.20993
	1678.86	0.53679	0.268395	0.49169	0.245845	0.03958	0.01979	0.44404	0.22202
	1677.89	0.55573	0.277865	0.51966	0.25983	0.04127	0.020635	0.47013	0.235065
	1676.93	0.57594	0.28797	0.54981	0.274905	0.04307	0.021535	0.49828	0.24914
	1675.97	0.5984	0.2992	0.58235	0.291175	0.04499	0.022495	0.5287	0.26435
	1675	0.6232	0.3116	0.61747	0.308735	0.04703	0.023515	0.56156	0.28078
	1674.04	0.65004	0.32502	0.65539	0.327695	0.04921	0.024605	0.59708	0.29854
	1673.07	0.67904	0.33952	0.69633	0.348165	0.05153	0.025765	0.63547	0.317735
	1672.11	0.71133	0.355665	0.74055	0.370275	0.05403	0.027015	0.67695	0.338475
	1671.14	0.74822	0.37411	0.78826	0.39413	0.05669	0.028345	0.72174	0.36087
	1670.18	0.79125	0.395625	0.83969	0.419845	0.05956	0.02978	0.77005	0.385025
	1669.22	0.84199	0.420995	0.89505	0.447525	0.06263	0.031315	0.82207	0.411035
	1668.25	0.90039	0.450195	0.95451	0.477255	0.06594	0.03297	0.87795	0.438975
	1667.29	0.9652	0.4826	1.01819	0.509095	0.0695	0.03475	0.93778	0.46889
	1666.32	1.03561	0.517805	1.08613	0.543065	0.07335	0.036675	1.00157	0.500785
	1665.36	1.11277	0.556385	1.15823	0.579115	0.0775	0.03875	1.0692	0.5346
	1664.39	1.19887	0.599435	1.23427	0.617135	0.082	0.041	1.14043	0.570215
	1663.43	1.2953	0.64765	1.31382	0.65691	0.08687	0.043435	1.21476	0.60738
	1662.47	1.39984	0.69992	1.39618	0.69809	0.09216	0.04608	1.29148	0.64574
	1661.5	1.50596	0.75298	1.48039	0.740195	0.09791	0.048955	1.36957	0.684785
	1660.54	1.60713	0.803565	1.56515	0.782575	0.10417	0.052085	1.44769	0.723845
	1659.57	1.70017	0.850085	1.64882	0.82441	0.11099	0.055495	1.52413	0.762065
	1658.61	1.78361	0.891805	1.72944	0.86472	0.11844	0.05922	1.59689	0.798445
	1657.64	1.85568	0.92784	1.80482	0.90241	0.12659	0.063295	1.66368	0.83184
	1656.68	1.91399	0.956995	1.87261	0.936305	0.13551	0.067755	1.72209	0.861045
	1655.72	1.95643	0.978215	1.93052	0.96526	0.14529	0.072645	1.76974	0.88487
	1654.75	1.98304	0.99152	1.9765	0.98825	0.15602	0.07801	1.8045	0.90225
	1653.79	1.99626	0.99813	2.00898	1.00449	0.16779	0.083895	1.82468	0.91234
	1652.82	2	1	2.02706	1.01353	0.18072	0.09036	1.82928	0.91464
	1651.86	1.99693	0.998465	2.0306	1.0153	0.19492	0.09746	1.81805	0.909025
	1650.89	1.9867	0.99335	2.0203	1.01015	0.21049	0.105245	1.79158	0.89579
	1649.93	1.96762	0.98381	1.99758	0.99879	0.22755	0.113775	1.75117	0.875585
	1648.97	1.93839	0.969195	1.96444	0.98222	0.24619	0.123095	1.69871	0.849355
	1648	1.89992	0.94996	1.9232	0.9616	0.26649	0.133245	1.63648	0.81824
	1647.04	1.85581	0.927905	1.87632	0.93816	0.28847	0.144235	1.56689	0.783445
	1646.07	1.81062	0.90531	1.82616	0.91308	0.3121	0.15605	1.49232	0.74616
	1645.11	1.76755	0.883775	1.77476	0.88738	0.33727	0.168635	1.41495	0.707475
	1644.14	1.72691	0.863455	1.72378	0.86189	0.36373	0.181865	1.33665	0.668325
	1643.18	1.68741	0.843705	1.67437	0.837185	0.39108	0.19554	1.25899	0.629495
	1642.22	1.64772	0.82386	1.62714	0.81357	0.41873	0.209365	1.18317	0.591585
	1641.25	1.60744	0.80372	1.5822	0.7911	0.44588	0.22294	1.11007	0.555035
	1640.29	1.56626	0.78313	1.53916	0.76958	0.47154	0.23577	1.04031	0.520155
	1639.32	1.5231	0.76155	1.49723	0.748615	0.49454	0.24727	0.97427	0.487135
	1638.36	1.47642	0.73821	1.45538	0.72769	0.51364	0.25682	0.91214	0.45607
	1637.39	1.42541	0.712705	1.4125	0.70625	0.52767	0.263835	0.85398	0.42699
	1636.43	1.3703	0.68515	1.3676	0.6838	0.5357	0.26785	0.79974	0.39987
	1635.47	1.31239	0.656195	1.31998	0.65999	0.53712	0.26856	0.7493	0.37465
	1634.5	1.25403	0.627015	1.26938	0.63469	0.53185	0.265925	0.7025	0.35125
	1633.54	1.19747	0.598735	1.21599	0.607995	0.52027	0.260135	0.65912	0.32956
	1632.57	1.14317	0.571585	1.1604	0.5802	0.50318	0.25159	0.61897	0.309485
	1631.61	1.09063	0.545315	1.1035	0.55175	0.48168	0.24084	0.58181	0.290905
	1630.64	1.03931	0.519655	1.04631	0.523155	0.457	0.2285	0.54743	0.273715
	1629.68	0.98821	0.494105	0.98982	0.49491	0.43035	0.215175	0.51562	0.25781
	1628.71	0.93684	0.46842	0.93492	0.46746	0.4028	0.2014	0.48618	0.24309
	1627.75	0.88601	0.443005	0.88232	0.44116	0.37524	0.18762	0.45892	0.22946
	1626.79	0.83775	0.418875	0.83251	0.416255	0.34834	0.17417	0.43366	0.21683
	1625.82	0.79328	0.39664	0.78581	0.392905	0.32259	0.161295	0.41023	0.205115
	1624.86	0.75197	0.375985	0.74239	0.371195	0.29828	0.14914	0.38848	0.19424
	1623.89	0.713	0.3565	0.70228	0.35114	0.2756	0.1378	0.36828	0.18414
	1622.93	0.67674	0.33837	0.66543	0.332715	0.25459	0.127295	0.34949	0.174745
	1621.96	0.644	0.322	0.63171	0.315855	0.23525	0.117625	0.33201	0.166005
	1621	0.61427	0.307135	0.60095	0.300475	0.21753	0.108765	0.31571	0.157855
	1620.04	0.58627	0.293135	0.57299	0.286495	0.20134	0.10067	0.30051	0.150255
	1619.07	0.55912	0.27956	0.54761	0.273805	0.18658	0.09329	0.28632	0.14316
	1618.11	0.53228	0.26614	0.52463	0.262315	0.17312	0.08656	0.27305	0.136525
	1617.14	0.50608	0.25304	0.50386	0.25193	0.16087	0.080435	0.26063	0.130315
	1616.18	0.48172	0.24086	0.48509	0.242545	0.14971	0.074855	0.249	0.1245
	1615.21	0.46062	0.23031	0.46815	0.234075	0.13955	0.069775	0.2381	0.11905
	1614.25	0.44294	0.22147	0.45286	0.22643	0.13027	0.065135	0.22786	0.11393
	1613.29	0.42823	0.214115	0.43906	0.21953	0.12181	0.060905	0.21824	0.10912
	1612.32	0.41619	0.208095	0.42657	0.213285	0.11407	0.057035	0.20919	0.104595
	1611.36	0.40654	0.20327	0.41523	0.207615	0.10698	0.05349	0.20066	0.10033
	1610.39	0.3986	0.1993	0.40489	0.202445	0.10049	0.050245	0.19263	0.096315
	1609.43	0.39148	0.19574	0.39538	0.19769	0.09453	0.047265	0.18506	0.09253
	1608.46	0.38453	0.192265	0.38655	0.193275	0.08906	0.04453	0.17791	0.088955
	1607.5	0.37754	0.18877	0.37826	0.18913	0.08401	0.042005	0.17115	0.085575
	1606.54	0.37014	0.18507	0.37036	0.18518	0.07936	0.03968	0.16475	0.082375
	1605.57	0.36252	0.18126	0.3627	0.18135	0.07507	0.037535	0.1587	0.07935
	1604.61	0.35499	0.177495	0.35518	0.17759	0.0711	0.03555	0.15297	0.076485
	1603.64	0.34818	0.17409	0.34768	0.17384	0.06742	0.03371	0.14753	0.073765
	1602.68	0.34205	0.171025	0.34011	0.170055	0.064	0.032	0.14237	0.071185
	1601.71	0.33614	0.16807	0.3324	0.1662	0.06083	0.030415	0.13746	0.06873
	1600.75	0.33032	0.16516	0.3245	0.16225	0.05788	0.02894	0.1328	0.0664
	1599.79	0.325	0.1625	0.31638	0.15819	0.05513	0.027565	0.12837	0.064185

## Sheet: Sup. Fig. 5c
PSMα4
	Wavenumber (cm-1)	Spectra	Spectra (normalized)	Fit	Fit (normalized)	Peak 1	Peak 1 (normalized)	Peak 2	Peak 2 (normalized)
	1700.07	-0.05081	-0.116145	0.01622	0.0370768	0.00914	0.0208929	0.00708	0.016184
	1699.11	-0.04499	-0.102841	0.01676	0.0383112	0.00938	0.0214415	0.00738	0.0168697
	1698.15	-0.03835	-0.0876632	0.01733	0.0396141	0.00963	0.0220129	0.0077	0.0176012
	1697.18	-0.03119	-0.0712963	0.01793	0.0409857	0.00988	0.0225844	0.00804	0.0183784
	1696.22	-0.02405	-0.0549752	0.01856	0.0424258	0.01015	0.0232016	0.00841	0.0192242
	1695.25	-0.01764	-0.0403228	0.01923	0.0439573	0.01043	0.0238416	0.0088	0.0201157
	1694.29	-0.01257	-0.0287334	0.01993	0.0455574	0.01072	0.0245045	0.00922	0.0210757
	1693.32	-0.009	-0.0205728	0.02068	0.0472718	0.01102	0.0251903	0.00966	0.0220815
	1692.36	-0.00661	-0.0151096	0.02147	0.0490777	0.01133	0.0258989	0.01014	0.0231787
	1691.39	-0.00484	-0.0110636	0.02231	0.0509978	0.01166	0.0266533	0.01065	0.0243445
	1690.43	-0.00313	-0.00715478	0.0232	0.0530322	0.012	0.0274305	0.01121	0.0256246
	1689.47	-0.00113	-0.00258303	0.02415	0.0552038	0.01235	0.0282305	0.0118	0.0269733
	1688.5	0.00117	0.00267447	0.02517	0.0575354	0.01273	0.0290991	0.01244	0.0284362
	1687.54	0.00364	0.00832057	0.02625	0.0600041	0.01311	0.0299678	0.01314	0.0300363
	1686.57	0.00632	0.0144467	0.02741	0.0626557	0.01352	0.030905	0.01389	0.0317507
	1685.61	0.0094	0.0214872	0.02865	0.0654902	0.01395	0.0318879	0.0147	0.0336023
	1684.64	0.01301	0.0297392	0.02998	0.0685304	0.01439	0.0328937	0.01559	0.0356367
	1683.68	0.01697	0.0387912	0.03141	0.0717992	0.01486	0.033968	0.01655	0.0378312
	1682.72	0.02091	0.0477976	0.03295	0.0753195	0.01535	0.0350881	0.0176	0.0402313
	1681.75	0.02468	0.0564153	0.03462	0.0791369	0.01586	0.0362539	0.01875	0.0428601
	1680.79	0.02829	0.0646673	0.03642	0.0832514	0.0164	0.0374883	0.02001	0.0457403
	1679.82	0.03184	0.0727821	0.03837	0.0877089	0.01697	0.0387912	0.02139	0.0488948
	1678.86	0.03549	0.0811256	0.04048	0.0925321	0.01757	0.0401628	0.02291	0.0523693
	1677.89	0.03948	0.0902462	0.04279	0.0978124	0.0182	0.0416029	0.02459	0.0562096
	1676.93	0.04405	0.100693	0.0453	0.10355	0.01886	0.0431115	0.02643	0.0604156
	1675.97	0.04927	0.112625	0.04804	0.109813	0.01956	0.0447116	0.02848	0.0651016
	1675	0.05496	0.125631	0.05105	0.116694	0.0203	0.0464032	0.03075	0.0702905
	1674.04	0.06078	0.138935	0.05434	0.124214	0.02108	0.0481862	0.03326	0.0760281
	1673.07	0.06648	0.151965	0.05797	0.132512	0.02191	0.0500834	0.03606	0.0824285
	1672.11	0.07199	0.16456	0.06196	0.141633	0.02278	0.0520721	0.03918	0.0895604
	1671.14	0.07735	0.176812	0.06636	0.15169	0.02371	0.054198	0.04265	0.0974924
	1670.18	0.08267	0.188973	0.07121	0.162777	0.02469	0.0564382	0.04653	0.106362
	1669.22	0.08805	0.201271	0.07657	0.175029	0.02573	0.0588155	0.05084	0.116214
	1668.25	0.09358	0.213912	0.08248	0.188539	0.02684	0.0613528	0.05564	0.127186
	1667.29	0.0994	0.227216	0.08899	0.20342	0.02802	0.0640501	0.06096	0.139347
	1666.32	0.10567	0.241548	0.09612	0.219718	0.02928	0.0669303	0.06684	0.152788
	1665.36	0.11248	0.257115	0.1039	0.237502	0.03063	0.0700162	0.07327	0.167486
	1664.39	0.11982	0.273893	0.11232	0.256749	0.03206	0.073285	0.08025	0.183441
	1663.43	0.12771	0.291929	0.12131	0.277299	0.0336	0.0768053	0.08771	0.200494
	1662.47	0.13613	0.311176	0.13076	0.2989	0.03524	0.0805541	0.09552	0.218346
	1661.5	0.1447	0.330766	0.14048	0.321119	0.03701	0.0846001	0.10347	0.236519
	1660.54	0.15287	0.349441	0.15017	0.343269	0.03891	0.0889432	0.11127	0.254349
	1659.57	0.16016	0.366105	0.15947	0.364528	0.04095	0.0936064	0.11852	0.270921
	1658.61	0.1663	0.38014	0.16791	0.383821	0.04315	0.0986353	0.12476	0.285185
	1657.64	0.17125	0.391455	0.17505	0.400142	0.04553	0.104076	0.12952	0.296066
	1656.68	0.17504	0.400119	0.18049	0.412577	0.04809	0.109928	0.13239	0.302626
	1655.72	0.17762	0.406016	0.18397	0.420532	0.05088	0.116305	0.1331	0.304249
	1654.75	0.17888	0.408897	0.18546	0.423938	0.0539	0.123208	0.13157	0.300752
	1653.79	0.17885	0.408828	0.18513	0.423183	0.05718	0.130706	0.12795	0.292477
	1652.82	0.17791	0.406679	0.18333	0.419069	0.06075	0.138867	0.12258	0.280202
	1651.86	0.17664	0.403776	0.18055	0.412714	0.06465	0.147782	0.11591	0.264955
	1650.89	0.17531	0.400736	0.17731	0.405308	0.06891	0.157519	0.1084	0.247788
	1649.93	0.17391	0.397536	0.17408	0.397924	0.07357	0.168172	0.10051	0.229753
	1648.97	0.17257	0.394473	0.17127	0.391501	0.07869	0.179875	0.09258	0.211626
	1648	0.17176	0.392621	0.1692	0.386769	0.08432	0.192745	0.08488	0.194025
	1647.04	0.1721	0.393398	0.16811	0.384278	0.09052	0.206917	0.07759	0.177361
	1646.07	0.17394	0.397604	0.16816	0.384392	0.09735	0.22253	0.07081	0.161863
	1645.11	0.17712	0.404873	0.16949	0.387432	0.10491	0.239811	0.06458	0.147622
	1644.14	0.18123	0.414268	0.17218	0.393581	0.11327	0.258921	0.05891	0.134661
	1643.18	0.18619	0.425606	0.17632	0.403045	0.12253	0.280088	0.05379	0.122957
	1642.22	0.19217	0.439276	0.18198	0.415983	0.1328	0.303564	0.04918	0.112419
	1641.25	0.19937	0.455734	0.18923	0.432555	0.14419	0.3296	0.04503	0.102933
	1640.29	0.20783	0.475073	0.19815	0.452945	0.15684	0.358516	0.04131	0.0944293
	1639.32	0.21757	0.497337	0.20882	0.477336	0.17085	0.390541	0.03798	0.0868174
	1638.36	0.22876	0.522916	0.22133	0.505932	0.18634	0.425949	0.03498	0.0799598
	1637.39	0.24179	0.552701	0.23572	0.538826	0.20342	0.464992	0.03229	0.0738108
	1636.43	0.25716	0.587835	0.25203	0.576108	0.22216	0.507829	0.02987	0.068279
	1635.47	0.27511	0.628866	0.27024	0.617734	0.24254	0.554415	0.02769	0.0632958
	1634.5	0.29495	0.674218	0.29022	0.663405	0.2645	0.604613	0.02572	0.0587926
	1633.54	0.31543	0.721032	0.31174	0.712597	0.2878	0.657874	0.02394	0.0547238
	1632.57	0.33591	0.767847	0.33438	0.76435	0.31205	0.713306	0.02233	0.0510435
	1631.61	0.35623	0.814296	0.35747	0.81713	0.33661	0.769447	0.02086	0.0476833
	1630.64	0.37604	0.859579	0.38014	0.868951	0.36061	0.824308	0.01953	0.0446431
	1629.68	0.39456	0.901913	0.40124	0.917183	0.38293	0.875329	0.01831	0.0418543
	1628.71	0.41092	0.93931	0.41945	0.958809	0.40225	0.919492	0.0172	0.039317
	1627.75	0.42419	0.969644	0.43343	0.990765	0.41725	0.95378	0.01618	0.0369854
	1626.79	0.43336	0.990605	0.44197	1.01029	0.42672	0.975427	0.01525	0.0348595
	1625.82	0.43747	1	0.44425	1.0155	0.42985	0.982582	0.01439	0.0328937
	1624.86	0.43588	0.996365	0.43997	1.00571	0.42636	0.974604	0.0136	0.0310878
	1623.89	0.42836	0.979176	0.42944	0.981644	0.41657	0.952225	0.01287	0.0294192
	1622.93	0.41543	0.949619	0.4135	0.945208	0.4013	0.91732	0.0122	0.0278876
	1621.96	0.39835	0.910577	0.39335	0.899147	0.38178	0.8727	0.01157	0.0264475
	1621	0.37834	0.864836	0.37034	0.846549	0.35934	0.821405	0.011	0.0251446
	1620.04	0.35625	0.814342	0.34574	0.790317	0.33528	0.766407	0.01046	0.0239102
	1619.07	0.33262	0.760326	0.32068	0.733033	0.31072	0.710266	0.00996	0.0227673
	1618.11	0.30773	0.703431	0.296	0.676618	0.28651	0.654925	0.00949	0.0216929
	1617.14	0.28195	0.644501	0.27233	0.622511	0.26327	0.601801	0.00906	0.02071
	1616.18	0.25659	0.586532	0.25005	0.571582	0.2414	0.551809	0.00865	0.0197728
	1615.21	0.23345	0.533637	0.22937	0.52431	0.2211	0.505406	0.00827	0.0189042
	1614.25	0.21305	0.487005	0.21037	0.480879	0.20246	0.462797	0.00791	0.0180812
	1613.29	0.19478	0.445242	0.19304	0.441265	0.18546	0.423938	0.00758	0.0173269
	1612.32	0.17796	0.406794	0.17732	0.405331	0.17005	0.388712	0.00727	0.0166183
	1611.36	0.1622	0.370768	0.16309	0.372803	0.15612	0.35687	0.00697	0.0159325
	1610.39	0.14738	0.336892	0.15024	0.343429	0.14355	0.328137	0.00669	0.0152925
	1609.43	0.13353	0.305232	0.13865	0.316936	0.13221	0.302215	0.00643	0.0146982
	1608.46	0.12074	0.275996	0.12819	0.293026	0.122	0.278876	0.00619	0.0141495
	1607.5	0.1091	0.249389	0.11874	0.271424	0.11279	0.257823	0.00595	0.0136009
	1606.54	0.09864	0.225478	0.11021	0.251926	0.10448	0.238828	0.00573	0.013098
	1605.57	0.08935	0.204243	0.10249	0.234279	0.09696	0.221638	0.00552	0.012618
	1604.61	0.0812	0.185613	0.09549	0.218278	0.09016	0.206094	0.00533	0.0121837
	1603.64	0.07403	0.169223	0.08914	0.203763	0.084	0.192013	0.00514	0.0117494
	1602.68	0.06766	0.154662	0.08336	0.19055	0.0784	0.179212	0.00496	0.0113379
	1601.71	0.06188	0.14145	0.0781	0.178527	0.07331	0.167577	0.00479	0.0109493
	1600.75	0.05659	0.129357	0.0733	0.167554	0.06867	0.156971	0.00463	0.0105836
	1599.79	0.05182	0.118454	0.06891	0.157519	0.06443	0.147279	0.00448	0.0102407

## Sheet: Sup. Fig. 5d
PSMβ1
	Wavenumber (cm-1)	Spectra	Spectra (normalized)	Fit	Fit (normalized)	Peak 1	Peak 1 (normalized)	Peak 2	Peak 2 (normalized)
	1700.07	0.0012	0.00462713	0.02139	0.0824786	0.00798	0.0307704	0.01341	0.0517082
	1699.11	0.00169	0.00651654	0.02217	0.0854862	0.00818	0.0315416	0.01399	0.0539446
	1698.15	0.00258	0.00994833	0.02299	0.0886481	0.00839	0.0323514	0.01461	0.0563353
	1697.18	0.00676	0.0260662	0.02387	0.0920413	0.0086	0.0331611	0.01526	0.0588417
	1696.22	0.01097	0.0422997	0.02479	0.0955888	0.00883	0.034048	0.01596	0.0615408
	1695.25	0.0151	0.0582247	0.02577	0.0993676	0.00906	0.0349348	0.0167	0.0643942
	1694.29	0.01883	0.0726074	0.0268	0.103339	0.00931	0.0358988	0.0175	0.067479
	1693.32	0.02191	0.0844837	0.02791	0.107619	0.00956	0.0368628	0.01834	0.070718
	1692.36	0.02434	0.0938536	0.02908	0.112131	0.00983	0.0379039	0.01925	0.0742269
	1691.39	0.02629	0.101373	0.03032	0.116912	0.0101	0.038945	0.02022	0.0779671
	1690.43	0.02805	0.108159	0.03165	0.122041	0.01039	0.0400632	0.02126	0.0819773
	1689.47	0.02996	0.115524	0.03307	0.127516	0.01069	0.04122	0.02238	0.086296
	1688.5	0.03223	0.124277	0.03458	0.133338	0.011	0.0424154	0.02358	0.0909231
	1687.54	0.03477	0.134071	0.03619	0.139547	0.01132	0.0436493	0.02487	0.0958973
	1686.57	0.0374	0.144212	0.03792	0.146217	0.01166	0.0449603	0.02626	0.101257
	1685.61	0.04009	0.154585	0.03977	0.153351	0.01202	0.0463484	0.02775	0.107002
	1684.64	0.04293	0.165536	0.04175	0.160986	0.01239	0.0477751	0.02936	0.11321
	1683.68	0.04594	0.177142	0.04388	0.169199	0.01278	0.0492789	0.0311	0.11992
	1682.72	0.04899	0.188903	0.04616	0.17799	0.01318	0.0508213	0.03298	0.127169
	1681.75	0.05211	0.200933	0.04862	0.187476	0.01361	0.0524794	0.03501	0.134997
	1680.79	0.05549	0.213966	0.05126	0.197656	0.01406	0.0542145	0.0372	0.143441
	1679.82	0.05914	0.22804	0.0541	0.208606	0.01452	0.0559883	0.03957	0.15258
	1678.86	0.06273	0.241883	0.05715	0.220367	0.01502	0.0579162	0.04214	0.162489
	1677.89	0.06601	0.254531	0.06044	0.233053	0.01553	0.0598828	0.0449	0.173132
	1676.93	0.06916	0.266677	0.06397	0.246665	0.01607	0.061965	0.04789	0.184661
	1675.97	0.07265	0.280134	0.06776	0.261279	0.01664	0.0641629	0.05111	0.197077
	1675	0.07682	0.296213	0.07182	0.276934	0.01725	0.066515	0.05458	0.210457
	1674.04	0.08153	0.314375	0.07617	0.293707	0.01788	0.0689442	0.0583	0.224801
	1673.07	0.08641	0.333192	0.08082	0.311637	0.01855	0.0715277	0.06227	0.24011
	1672.11	0.09124	0.351816	0.08575	0.330647	0.01925	0.0742269	0.0665	0.25642
	1671.14	0.09594	0.369939	0.09097	0.350775	0.01999	0.0770803	0.07097	0.273656
	1670.18	0.10049	0.387484	0.09645	0.371906	0.02078	0.0801265	0.07567	0.291779
	1669.22	0.10492	0.404565	0.10216	0.393923	0.02161	0.0833269	0.08054	0.310558
	1668.25	0.10926	0.4213	0.10805	0.416635	0.02249	0.0867201	0.08555	0.329876
	1667.29	0.11361	0.438074	0.11405	0.43977	0.02343	0.0903447	0.09062	0.349425
	1666.32	0.11812	0.455464	0.12006	0.462944	0.02442	0.0941621	0.09564	0.368782
	1665.36	0.12283	0.473625	0.12598	0.485772	0.02547	0.0982108	0.1005	0.387522
	1664.39	0.12765	0.492211	0.13166	0.507673	0.02659	0.102529	0.10507	0.405144
	1663.43	0.13253	0.511028	0.13697	0.528148	0.02779	0.107157	0.10918	0.420992
	1662.47	0.13736	0.529652	0.14175	0.54658	0.02906	0.112054	0.11269	0.434526
	1661.5	0.14196	0.54739	0.14586	0.562428	0.03041	0.117259	0.11544	0.44513
	1660.54	0.14613	0.563469	0.14917	0.575191	0.03186	0.12285	0.11731	0.452341
	1659.57	0.14973	0.57735	0.15161	0.584599	0.03341	0.128827	0.1182	0.455772
	1658.61	0.15256	0.588263	0.15313	0.59046	0.03506	0.135189	0.11807	0.455271
	1657.64	0.15439	0.595319	0.15376	0.59289	0.03684	0.142053	0.11692	0.450837
	1656.68	0.15502	0.597748	0.15356	0.592118	0.03874	0.149379	0.11482	0.442739
	1655.72	0.15441	0.595396	0.15265	0.58861	0.04079	0.157284	0.11186	0.431326
	1654.75	0.15278	0.589111	0.15117	0.582903	0.04299	0.165767	0.10819	0.417174
	1653.79	0.15052	0.580396	0.14929	0.575654	0.04535	0.174867	0.10394	0.400787
	1652.82	0.14806	0.570911	0.14719	0.567556	0.0479	0.1847	0.09929	0.382856
	1651.86	0.1458	0.562196	0.14503	0.559227	0.05066	0.195342	0.09437	0.363885
	1650.89	0.14401	0.555294	0.14296	0.551245	0.05363	0.206794	0.08933	0.344451
	1649.93	0.14274	0.550397	0.14111	0.544112	0.05684	0.219172	0.08427	0.32494
	1648.97	0.14185	0.546965	0.13961	0.538328	0.06032	0.23259	0.07929	0.305738
	1648	0.1411	0.544073	0.13854	0.534202	0.06409	0.247127	0.07445	0.287075
	1647.04	0.14039	0.541336	0.13798	0.532043	0.06817	0.26286	0.06981	0.269183
	1646.07	0.13999	0.539793	0.138	0.53212	0.0726	0.279941	0.0654	0.252179
	1645.11	0.1402	0.540603	0.13864	0.534588	0.0774	0.29845	0.06123	0.236099
	1644.14	0.14107	0.543958	0.13994	0.539601	0.08261	0.318539	0.05732	0.221023
	1643.18	0.14255	0.549665	0.14193	0.547274	0.08826	0.340325	0.05367	0.206948
	1642.22	0.14464	0.557723	0.14465	0.557762	0.09439	0.363962	0.05027	0.193838
	1641.25	0.14739	0.568327	0.14812	0.571142	0.10101	0.389489	0.04711	0.181653
	1640.29	0.15082	0.581553	0.15234	0.587414	0.10817	0.417097	0.04418	0.170356
	1639.32	0.15486	0.597131	0.15734	0.606694	0.11587	0.446788	0.04146	0.159867
	1638.36	0.15949	0.614984	0.1631	0.628904	0.12415	0.478715	0.03895	0.150189
	1637.39	0.1648	0.635459	0.16961	0.654006	0.13298	0.512763	0.03663	0.141243
	1636.43	0.17118	0.66006	0.17683	0.681846	0.14235	0.548893	0.03448	0.132953
	1635.47	0.17911	0.690638	0.1847	0.712192	0.15222	0.586951	0.03249	0.12528
	1634.5	0.18867	0.727501	0.19313	0.744698	0.16249	0.626552	0.03065	0.118185
	1633.54	0.19933	0.768605	0.20198	0.778823	0.17304	0.667232	0.02894	0.111591
	1632.57	0.21048	0.811599	0.21106	0.813835	0.1837	0.708337	0.02736	0.105499
	1631.61	0.22161	0.854515	0.22013	0.848809	0.19424	0.748978	0.02589	0.0998303
	1630.64	0.2322	0.89535	0.22891	0.882664	0.20438	0.788077	0.02453	0.0945863
	1629.68	0.2417	0.931981	0.23707	0.914128	0.2138	0.8244	0.02326	0.0896892
	1628.71	0.24956	0.962289	0.24423	0.941737	0.22214	0.856559	0.02209	0.0851778
	1627.75	0.2553	0.984422	0.25004	0.96414	0.22904	0.883165	0.02099	0.0809362
	1626.79	0.2586	0.997147	0.25415	0.979988	0.23418	0.902984	0.01997	0.0770032
	1625.82	0.25934	1	0.25629	0.988239	0.23728	0.914938	0.01901	0.0733015
	1624.86	0.25765	0.993483	0.25629	0.988239	0.23817	0.91837	0.01812	0.0698697
	1623.89	0.25378	0.978561	0.2541	0.979795	0.23681	0.913126	0.01729	0.0666692
	1622.93	0.24807	0.956544	0.24978	0.963137	0.23327	0.899476	0.01651	0.0636616
	1621.96	0.24083	0.928627	0.24352	0.938999	0.22775	0.878191	0.01578	0.0608468
	1621	0.23231	0.895774	0.23561	0.908498	0.22052	0.850312	0.01509	0.0581862
	1620.04	0.22274	0.858873	0.22637	0.87287	0.21192	0.817151	0.01445	0.0557184
	1619.07	0.21247	0.819272	0.21617	0.833539	0.20232	0.780134	0.01384	0.0533662
	1618.11	0.20189	0.778476	0.20535	0.791818	0.19207	0.740611	0.01327	0.0511684
	1617.14	0.19124	0.73741	0.19422	0.748901	0.18149	0.699815	0.01274	0.0491247
	1616.18	0.1808	0.697154	0.18306	0.705869	0.17083	0.658711	0.01223	0.0471582
	1615.21	0.17083	0.658711	0.17208	0.663531	0.16032	0.618185	0.01175	0.0453073
	1614.25	0.16127	0.621848	0.16143	0.622465	0.15013	0.578893	0.0113	0.0435721
	1613.29	0.15187	0.585602	0.15124	0.583173	0.14036	0.54122	0.01088	0.0419526
	1612.32	0.14248	0.549395	0.14157	0.545886	0.1311	0.505514	0.01047	0.0403717
	1611.36	0.13316	0.513457	0.13247	0.510797	0.12238	0.47189	0.01009	0.0389065
	1610.39	0.12416	0.478754	0.12395	0.477944	0.11423	0.440464	0.00973	0.0375183
	1609.43	0.1158	0.446518	0.11602	0.447366	0.10663	0.411159	0.00938	0.0361687
	1608.46	0.10841	0.418023	0.10865	0.418948	0.09959	0.384013	0.00906	0.0349348
	1607.5	0.10214	0.393846	0.10182	0.392612	0.09307	0.358873	0.00875	0.0337395
	1606.54	0.09689	0.373602	0.0955	0.368242	0.08705	0.33566	0.00845	0.0325827
	1605.57	0.09239	0.35625	0.08967	0.345762	0.0815	0.314259	0.00817	0.031503
	1604.61	0.08824	0.340248	0.08428	0.324979	0.07637	0.294478	0.00791	0.0305005
	1603.64	0.08414	0.324439	0.0793	0.305776	0.07165	0.276278	0.00765	0.029498
	1602.68	0.08003	0.308591	0.07471	0.288077	0.0673	0.259505	0.00741	0.0285725
	1601.71	0.07608	0.29336	0.07046	0.27169	0.06328	0.244004	0.00718	0.0276857
	1600.75	0.07251	0.279594	0.06653	0.256536	0.05958	0.229737	0.00696	0.0268374
	1599.79	0.06938	0.267525	0.0629	0.242539	0.05616	0.21655	0.00675	0.0260276

## Sheet: Sup. Fig. 5e
PSMβ2
	Wavenumber (cm-1)	Spectra	Spectra (normalized)	Fit	Fit (normalized)	Peak 1	Peak 1 (normalized)	Peak 2	Peak 2 (normalized)	Peak 3	Peak 3 (normalized)
	1700.07	0.03289	0.184444	0.0372	0.208614	0.00516	0.0289367	0.00011	0.000616869	0.00305	0.0171041
	1699.11	0.03611	0.202501	0.03813	0.213829	0.00529	0.0296658	0.00012	0.000672948	0.00321	0.0180013
	1698.15	0.03888	0.218035	0.03907	0.2191	0.00543	0.0304509	0.00012	0.000672948	0.00338	0.0189547
	1697.18	0.04131	0.231662	0.04002	0.224428	0.00557	0.031236	0.00013	0.000729026	0.00356	0.0199641
	1696.22	0.04349	0.243887	0.04097	0.229755	0.00572	0.0320772	0.00013	0.000729026	0.00375	0.0210296
	1695.25	0.04495	0.252075	0.04194	0.235195	0.00587	0.0329183	0.00014	0.000785105	0.00396	0.0222073
	1694.29	0.04545	0.254879	0.0429	0.240579	0.00603	0.0338156	0.00014	0.000785105	0.00419	0.0234971
	1693.32	0.0455	0.255159	0.04387	0.246018	0.00619	0.0347129	0.00015	0.000841184	0.00443	0.024843
	1692.36	0.04578	0.256729	0.04485	0.251514	0.00636	0.0356662	0.00015	0.000841184	0.0047	0.0263571
	1691.39	0.04639	0.26015	0.04582	0.256954	0.00654	0.0366756	0.00016	0.000897263	0.00499	0.0279834
	1690.43	0.04701	0.263627	0.0468	0.26245	0.00673	0.0377411	0.00017	0.000953342	0.00531	0.0297779
	1689.47	0.04742	0.265926	0.04778	0.267945	0.00692	0.0388066	0.00017	0.000953342	0.00566	0.0317407
	1688.5	0.04774	0.267721	0.04876	0.273441	0.00713	0.0399843	0.00018	0.00100942	0.00604	0.0338717
	1687.54	0.04821	0.270357	0.04974	0.278937	0.00734	0.041162	0.00019	0.0010655	0.00646	0.036227
	1686.57	0.04891	0.274282	0.05074	0.284545	0.00756	0.0423957	0.0002	0.00112158	0.00692	0.0388066
	1685.61	0.04974	0.278937	0.05174	0.290153	0.00779	0.0436855	0.00021	0.00117766	0.00742	0.0416106
	1684.64	0.05074	0.284545	0.05276	0.295873	0.00803	0.0450314	0.00022	0.00123374	0.00798	0.044751
	1683.68	0.05221	0.292788	0.05379	0.301649	0.00829	0.0464895	0.00023	0.00128982	0.00859	0.0481718
	1682.72	0.05406	0.303163	0.05485	0.307593	0.00855	0.0479475	0.00024	0.0013459	0.00927	0.0519852
	1681.75	0.05593	0.31365	0.05595	0.313762	0.00883	0.0495177	0.00025	0.00140197	0.01003	0.0562472
	1680.79	0.05764	0.323239	0.05709	0.320155	0.00912	0.051144	0.00027	0.00151413	0.01087	0.0609578
	1679.82	0.05915	0.331707	0.05829	0.326884	0.00942	0.0528264	0.00028	0.00157021	0.0118	0.0661732
	1678.86	0.06044	0.338941	0.05955	0.33395	0.00975	0.054677	0.0003	0.00168237	0.01283	0.0719493
	1677.89	0.06161	0.345502	0.06089	0.341465	0.01008	0.0565276	0.00032	0.00179453	0.01398	0.0783984
	1676.93	0.06297	0.353129	0.06233	0.34954	0.01044	0.0585464	0.00034	0.00190668	0.01526	0.0855765
	1675.97	0.06469	0.362775	0.06387	0.358176	0.01081	0.0606214	0.00036	0.00201884	0.01667	0.0934836
	1675	0.0666	0.373486	0.06553	0.367485	0.0112	0.0628084	0.00038	0.002131	0.01822	0.102176
	1674.04	0.06842	0.383692	0.06732	0.377524	0.01162	0.0651638	0.00041	0.00229924	0.01993	0.111765
	1673.07	0.07005	0.392833	0.06924	0.388291	0.01205	0.0675751	0.00043	0.0024114	0.02177	0.122084
	1672.11	0.07161	0.401581	0.07128	0.399731	0.01251	0.0701548	0.00046	0.00257963	0.02375	0.133188
	1671.14	0.07328	0.410947	0.07342	0.411732	0.013	0.0729026	0.0005	0.00280395	0.02584	0.144908
	1670.18	0.0751	0.421153	0.07562	0.424069	0.01351	0.0757627	0.00054	0.00302826	0.02799	0.156965
	1669.22	0.077	0.431808	0.07782	0.436406	0.01406	0.078847	0.00058	0.00325258	0.03013	0.168966
	1668.25	0.07886	0.442239	0.07994	0.448295	0.01464	0.0820996	0.00063	0.00353297	0.03218	0.180462
	1667.29	0.08071	0.452613	0.08187	0.459118	0.01525	0.0855204	0.00068	0.00381337	0.03402	0.190781
	1666.32	0.08267	0.463605	0.08351	0.468315	0.0159	0.0891655	0.00074	0.00414984	0.03554	0.199305
	1665.36	0.08465	0.474708	0.08473	0.475157	0.0166	0.0930911	0.00081	0.0045424	0.03661	0.205305
	1664.39	0.08613	0.483008	0.08546	0.479251	0.01733	0.0971848	0.00089	0.00499103	0.03715	0.208333
	1663.43	0.08653	0.485251	0.08565	0.480316	0.01812	0.101615	0.00098	0.00549574	0.0371	0.208053
	1662.47	0.08587	0.48155	0.08533	0.478522	0.01895	0.10627	0.00109	0.00611261	0.03647	0.20452
	1661.5	0.08475	0.475269	0.08455	0.474148	0.01985	0.111317	0.00121	0.00678555	0.03532	0.198071
	1660.54	0.08362	0.468932	0.08343	0.467867	0.0208	0.116644	0.00135	0.00757066	0.03374	0.18921
	1659.57	0.08252	0.462764	0.08209	0.460352	0.02182	0.122364	0.00152	0.008524	0.03186	0.178668
	1658.61	0.08124	0.455585	0.08067	0.452389	0.02292	0.128533	0.00172	0.00964558	0.02979	0.167059
	1657.64	0.07963	0.446557	0.0793	0.444706	0.02409	0.135094	0.00196	0.0109915	0.02764	0.155002
	1656.68	0.07783	0.436463	0.07807	0.437808	0.02535	0.14216	0.00225	0.0126178	0.0255	0.143001
	1655.72	0.07635	0.428163	0.07708	0.432257	0.02671	0.149787	0.0026	0.0145805	0.02343	0.131393
	1654.75	0.07551	0.423452	0.07639	0.428387	0.02817	0.157974	0.00303	0.0169919	0.02147	0.120402
	1653.79	0.07533	0.422443	0.07606	0.426537	0.02974	0.166779	0.00355	0.019908	0.01964	0.110139
	1652.82	0.07564	0.424181	0.07613	0.426929	0.03144	0.176312	0.0042	0.0235532	0.01796	0.100718
	1651.86	0.07633	0.428051	0.07665	0.429845	0.03328	0.186631	0.00499	0.0279834	0.01643	0.0921377
	1650.89	0.07742	0.434163	0.07764	0.435397	0.03527	0.19779	0.00595	0.033367	0.01504	0.0843428
	1649.93	0.07903	0.443192	0.0791	0.443585	0.03742	0.209847	0.00708	0.0397039	0.01379	0.0773329
	1648.97	0.08126	0.455698	0.08102	0.454352	0.03975	0.222914	0.00834	0.0467699	0.01266	0.070996
	1648	0.08377	0.469773	0.08326	0.466913	0.04229	0.237158	0.0096	0.0538358	0.01164	0.0652759
	1647.04	0.08613	0.483008	0.08563	0.480204	0.04504	0.25258	0.01065	0.0597241	0.01073	0.0601727
	1646.07	0.08814	0.49428	0.08785	0.492654	0.04803	0.269347	0.01122	0.0629206	0.0099	0.0555182
	1645.11	0.08976	0.503365	0.08977	0.503421	0.05129	0.287629	0.01112	0.0623598	0.00916	0.0513683
	1644.14	0.09107	0.510711	0.09143	0.51273	0.05483	0.307481	0.01039	0.058266	0.00849	0.047611
	1643.18	0.09243	0.518338	0.09308	0.521983	0.05868	0.329071	0.00925	0.051873	0.00788	0.0441902
	1642.22	0.09427	0.528656	0.09499	0.532694	0.06287	0.352568	0.00797	0.0446949	0.00733	0.0411059
	1641.25	0.09693	0.543573	0.09737	0.546041	0.06742	0.378084	0.00674	0.0377972	0.00684	0.038358
	1640.29	0.10041	0.563089	0.10034	0.562696	0.07235	0.405731	0.00566	0.0317407	0.00639	0.0358345
	1639.32	0.10448	0.585913	0.10394	0.582885	0.07768	0.435621	0.00475	0.0266375	0.00598	0.0335352
	1638.36	0.109	0.611261	0.10817	0.606606	0.08344	0.467923	0.004	0.0224316	0.0056	0.0314042
	1637.39	0.11391	0.638795	0.113	0.633692	0.08961	0.502524	0.00339	0.0190108	0.00526	0.0294975
	1636.43	0.11928	0.66891	0.1184	0.663975	0.09619	0.539424	0.00289	0.0162068	0.00495	0.0277591
	1635.47	0.12517	0.70194	0.1243	0.697061	0.10315	0.578454	0.00249	0.0139637	0.00466	0.0261328
	1634.5	0.13132	0.736429	0.13064	0.732616	0.11043	0.61928	0.00216	0.0121131	0.00439	0.0246187
	1633.54	0.13763	0.771815	0.13731	0.77002	0.11795	0.661451	0.00189	0.0105989	0.00415	0.0232728
	1632.57	0.14429	0.809163	0.14417	0.80849	0.12559	0.704296	0.00166	0.00930911	0.00393	0.022039
	1631.61	0.15113	0.847521	0.15104	0.847017	0.13318	0.74686	0.00147	0.00824361	0.00372	0.0208614
	1630.64	0.15763	0.883973	0.15771	0.884421	0.14051	0.787965	0.00131	0.00734634	0.00353	0.0197959
	1629.68	0.16334	0.915994	0.16392	0.919246	0.14733	0.826211	0.00117	0.00656124	0.00335	0.0187865
	1628.71	0.16826	0.943585	0.16941	0.950034	0.15338	0.860139	0.00106	0.00594437	0.00318	0.0178331
	1627.75	0.17254	0.967586	0.17387	0.975045	0.15837	0.888122	0.00095	0.0053275	0.00303	0.0169919
	1626.79	0.17594	0.986653	0.17707	0.99299	0.16206	0.908816	0.00087	0.00487887	0.00289	0.0162068
	1625.82	0.17796	0.997981	0.17878	1.00258	0.16424	0.921041	0.00079	0.00443024	0.00275	0.0154217
	1624.86	0.17832	1	0.17888	1.00314	0.16477	0.924013	0.00072	0.00403769	0.00263	0.0147488
	1623.89	0.17714	0.993383	0.17734	0.994504	0.16363	0.91762	0.00066	0.00370121	0.00251	0.0140758
	1622.93	0.17473	0.979868	0.17421	0.976952	0.16089	0.902254	0.00061	0.00342082	0.0024	0.013459
	1621.96	0.17114	0.959735	0.16966	0.951436	0.1567	0.878757	0.00057	0.0031965	0.0023	0.0128982
	1621	0.16597	0.930742	0.16392	0.919246	0.15129	0.848419	0.00053	0.00297218	0.00221	0.0123934
	1620.04	0.1591	0.892216	0.15724	0.881786	0.14493	0.812752	0.00049	0.00274787	0.00211	0.0118327
	1619.07	0.15118	0.847802	0.14991	0.84068	0.13789	0.773273	0.00046	0.00257963	0.00203	0.011384
	1618.11	0.14274	0.800471	0.14219	0.797387	0.13045	0.73155	0.00042	0.00235532	0.00195	0.0109354
	1617.14	0.13389	0.750841	0.13431	0.753197	0.12282	0.688762	0.0004	0.00224316	0.00187	0.0104868
	1616.18	0.12524	0.702333	0.12647	0.709231	0.11521	0.646086	0.00037	0.00207492	0.0018	0.0100942
	1615.21	0.11746	0.658703	0.11881	0.666274	0.10776	0.604307	0.00035	0.00196276	0.00174	0.00975774
	1614.25	0.11022	0.618102	0.11146	0.625056	0.10058	0.564042	0.00033	0.00185061	0.00167	0.00936519
	1613.29	0.10329	0.57924	0.10448	0.585913	0.09376	0.525796	0.00031	0.00173845	0.00161	0.00902871
	1612.32	0.09707	0.544358	0.09793	0.549181	0.08732	0.489681	0.00029	0.00162629	0.00155	0.00869224
	1611.36	0.09162	0.513795	0.09183	0.514973	0.0813	0.455922	0.00028	0.00157021	0.0015	0.00841184
	1610.39	0.08647	0.484915	0.08619	0.483345	0.0757	0.424518	0.00026	0.00145805	0.00145	0.00813145
	1609.43	0.08127	0.455754	0.08103	0.454408	0.07051	0.395413	0.00025	0.00140197	0.0014	0.00785105
	1608.46	0.07625	0.427602	0.07634	0.428107	0.06572	0.368551	0.00024	0.0013459	0.00135	0.00757066
	1607.5	0.07188	0.403096	0.07211	0.404385	0.06131	0.34382	0.00023	0.00128982	0.00131	0.00734634
	1606.54	0.0684	0.38358	0.06836	0.383356	0.05724	0.320996	0.00022	0.00123374	0.00127	0.00712203
	1605.57	0.06553	0.367485	0.06508	0.364962	0.05351	0.300079	0.00021	0.00117766	0.00123	0.00689771
	1604.61	0.06287	0.352568	0.06227	0.349204	0.05007	0.280787	0.0002	0.00112158	0.00119	0.0066734
	1603.64	0.06021	0.337651	0.05988	0.335801	0.04692	0.263122	0.00019	0.0010655	0.00115	0.00644908
	1602.68	0.05763	0.323183	0.0578	0.324136	0.04401	0.246803	0.00018	0.00100942	0.00112	0.00628084
	1601.71	0.05526	0.309892	0.05577	0.312752	0.04134	0.23183	0.00017	0.000953342	0.00108	0.00605653
	1600.75	0.05318	0.298228	0.05349	0.299966	0.03888	0.218035	0.00016	0.000897263	0.00105	0.00588829
	1599.79	0.0513	0.287685	0.05079	0.284825	0.03662	0.205361	0.00016	0.000897263	0.00102	0.00572005
