# Supplementary material for: Cross-talk between individual phenol-soluble modulins in Staphylococcus aureus biofilm enables rapid and efficient amyloid formation
Source: eLife. 2020 Dec 1;9:e59776. doi: 10.7554/eLife.59776 (PMC7732344; doi:10.7554/eLife.59776)
Supplement: Figure 2—source data 1. [file elife-59776-fig2-data1.xlsx]

## Sheet: Fig. 2a
Beam line CD
			MRE value		MRE value		MRE value		MRE value		MRE value
	Wavelength (nm)	PSMα1	PSMα1	PSMα3	PSMα3	PSMα4	PSMα4	PSMβ1	PSMβ1	PSMβ2	PSMβ2
	280	-0.1813	-203.225	-0.0463925	-125.202	0.0593417	260.791	0.1034	1351.41	-0.0913067	-1051.32
	279	-0.0110002	-12.3305	-0.0403591	-108.92	0.226558	995.664	-0.02735	-357.458	0.166087	1912.36
	278	0.131933	147.888	-0.0273925	-73.9256	0.158942	698.507	0.03805	497.305	0.07666	882.679
	277	0.100524	112.68	-0.0337004	-90.9492	0.144084	633.21	0.0947413	1238.25	0.112351	1293.63
	276	0.0833093	93.3841	-0.0211917	-57.1912	0.119008	523.007	0.124344	1625.15	0.0905606	1042.73
	275	0.0514569	57.6797	0.0272135	73.4426	0.173929	764.374	0.0722698	944.55	0.0843978	971.774
	274	-0.00489344	-5.48522	0.0305688	82.4977	0.153092	672.798	0.113881	1488.4	0.0758267	873.084
	273	-0.0709783	-79.5619	0.0303182	81.8214	0.178109	782.744	0.129939	1698.27	0.0383078	441.085
	272	-0.0464232	-52.0373	0.0448478	121.033	0.213357	937.649	0.17126	2238.33	0.0373353	429.886
	271	-0.0526276	-58.992	0.0360879	97.3925	0.228139	1002.61	0.11969	1564.32	0.0386641	445.186
	270	-0.041286	-46.2789	0.0471552	127.26	0.206481	907.431	0.0483642	632.108	0.0424181	488.411
	269	-0.0914416	-102.5	0.0181307	48.9305	0.159289	700.035	0.0252297	329.747	0.0504495	580.886
	268	-0.134012	-150.219	0.0906388	244.612	0.142505	626.274	0.0614542	803.192	-0.0136289	-156.926
	267	-0.137342	-153.952	0.121297	327.35	0.163666	719.271	0.0440855	576.187	-0.0110216	-126.905
	266	-0.0800062	-89.6815	0.158287	427.178	0.188261	827.356	0.0409114	534.703	-0.0536	-617.162
	265	-0.0319203	-35.7805	0.118779	320.556	0.1998	878.07	0.0560763	732.905	-0.0196026	-225.709
	264	0.0233807	26.2081	0.0930215	251.042	0.171298	752.808	0.00798398	104.349	0.0497242	572.535
	263	0.0217514	24.3819	0.0358238	96.6798	0.145243	638.304	-0.00176233	-23.0333	0.0387818	446.542
	262	-0.0498349	-55.8616	0.0669886	180.786	0.122462	538.186	0.00927554	121.229	0.0511303	588.725
	261	-0.102585	-114.991	0.131661	355.32	0.132897	584.049	-0.0924616	-1208.45	0.0229971	264.793
	260	-0.175865	-197.133	0.206276	556.69	0.10546	463.471	-0.1405	-1836.3	0.0127527	146.838
	259	-0.223181	-250.171	0.235355	635.167	0.127082	558.49	-0.107577	-1406.01	0.0240632	277.069
	258	-0.169196	-189.658	0.274401	740.541	0.148385	652.111	-0.135434	-1770.1	0.0236285	272.064
	257	-0.171069	-191.757	0.242125	653.436	0.141008	619.693	-0.0930518	-1216.16	0.0471206	542.556
	256	-0.20247	-226.955	0.255816	690.386	0.160417	704.991	-0.067968	-888.326	0.0575875	663.074
	255	-0.189124	-211.995	0.264166	712.921	0.151098	664.036	-0.0834103	-1090.15	0.0694672	799.86
	254	-0.246885	-276.742	0.304362	821.398	0.149505	657.033	-0.0889892	-1163.07	0.097704	1124.98
	253	-0.271873	-304.751	0.395749	1068.03	0.203889	896.037	-0.0522909	-683.43	0.124112	1429.05
	252	-0.279468	-313.265	0.370651	1000.3	0.179018	786.737	-0.10066	-1315.6	0.122472	1410.17
	251	-0.268389	-300.846	0.282107	761.338	0.157893	693.899	-0.120807	-1578.92	0.13397	1542.56
	250	-0.357282	-400.489	0.221805	598.597	0.133727	587.695	-0.140811	-1840.37	0.0706588	813.581
	249	-0.411191	-460.917	0.13892	374.913	0.0898783	394.992	-0.163526	-2137.24	-0.01575	-181.349
	248	-0.53449	-599.128	0.158387	427.447	0.0832042	365.66	-0.133479	-1744.54	0.0119696	137.821
	247	-0.618103	-692.852	0.171086	461.719	0.0865531	380.378	-0.0784988	-1025.96	0.013344	153.645
	246	-0.690741	-774.274	0.154163	416.049	0.112153	492.882	-0.107793	-1408.84	0.0304295	350.372
	245	-0.767598	-860.426	0.0484162	130.664	0.0706321	310.409	-0.102689	-1342.12	0.00770354	88.7002
	244	-0.98553	-1104.71	-0.000334061	-0.90155	0.0528651	232.328	-0.117208	-1531.89	-0.068967	-794.1
	243	-1.22284	-1370.73	-0.099947	-269.733	0.015234	66.9494	-0.13295	-1737.62	-0.0958075	-1103.15
	242	-1.45361	-1629.4	-0.262137	-707.445	-0.052876	-232.376	-0.231939	-3031.38	-0.157932	-1818.46
	241	-1.67064	-1872.67	-0.496188	-1339.09	-0.124983	-549.267	-0.229507	-2999.61	-0.16063	-1849.53
	240	-1.88516	-2113.13	-0.804283	-2170.56	-0.192621	-846.518	-0.288412	-3769.48	-0.199105	-2292.54
	239	-2.19125	-2456.25	-1.20824	-3260.76	-0.296626	-1303.59	-0.292306	-3820.37	-0.271012	-3120.49
	238	-2.61736	-2933.88	-1.60113	-4321.05	-0.374126	-1644.18	-0.321815	-4206.04	-0.441997	-5089.24
	237	-3.09175	-3465.64	-2.04282	-5513.07	-0.49428	-2172.23	-0.389403	-5089.41	-0.5248	-6042.66
	236	-3.57024	-4002	-2.51221	-6779.86	-0.575064	-2527.26	-0.489542	-6398.2	-0.624078	-7185.77
	235	-4.09907	-4594.78	-3.01176	-8128.01	-0.717419	-3152.87	-0.562871	-7356.59	-0.727468	-8376.22
	234	-4.64169	-5203.02	-3.54947	-9579.17	-0.821761	-3611.42	-0.678895	-8873	-0.883753	-10175.7
	233	-5.22793	-5860.16	-4.11406	-11102.9	-1.00036	-4396.34	-0.778777	-10178.4	-1.03687	-11938.7
	232	-5.81228	-6515.17	-4.63736	-12515.1	-1.14876	-5048.52	-0.842057	-11005.5	-1.20302	-13851.9
	231	-6.41427	-7189.96	-5.16148	-13929.6	-1.32645	-5829.39	-0.869621	-11365.7	-1.2913	-14868.3
	230	-6.9943	-7840.14	-5.68082	-15331.2	-1.49405	-6565.98	-0.941779	-12308.8	-1.38372	-15932.5
	229	-7.54651	-8459.13	-6.17189	-16656.4	-1.65881	-7290.02	-0.981258	-12824.8	-1.46573	-16876.7
	228	-8.19727	-9188.59	-6.63893	-17916.9	-1.80119	-7915.75	-1.05015	-13725.2	-1.56935	-18069.9
	227	-8.86799	-9940.41	-7.03947	-18997.8	-1.9705	-8659.84	-1.1556	-15103.4	-1.68194	-19366.2
	226	-9.4975	-10646.1	-7.4272	-20044.2	-2.11195	-9281.45	-1.1967	-15640.6	-1.82465	-21009.4
	225	-10.0926	-11313.1	-7.72426	-20845.9	-2.20827	-9704.76	-1.21933	-15936.4	-1.89628	-21834.1
	224	-10.6684	-11958.6	-7.90877	-21343.9	-2.29097	-10068.2	-1.27543	-16669.6	-1.89605	-21831.5
	223	-11.163	-12512.9	-7.87254	-21246.1	-2.40312	-10561.1	-1.34533	-17583.2	-1.91182	-22013.1
	222	-11.624	-13029.8	-7.56132	-20406.2	-2.49535	-10966.4	-1.42658	-18645.1	-1.91674	-22069.8
	221	-11.9588	-13405	-7.02211	-18951	-2.5761	-11321.3	-1.45069	-18960.1	-1.87129	-21546.4
	220	-12.095	-13557.7	-6.36034	-17165	-2.68523	-11800.9	-1.48252	-19376.2	-1.88352	-21687.3
	219	-12.1156	-13580.8	-5.71346	-15419.2	-2.69722	-11853.6	-1.50521	-19672.8	-1.81165	-20859.7
	218	-12.0681	-13527.5	-5.231	-14117.2	-2.71654	-11938.5	-1.54761	-20226.9	-1.75318	-20186.5
	217	-11.9897	-13439.6	-4.80907	-12978.5	-2.67424	-11752.6	-1.53852	-20108.1	-1.68472	-19398.2
	216	-11.7575	-13179.3	-4.39546	-11862.3	-2.59548	-11406.4	-1.49927	-19595.1	-1.60266	-18453.4
	215	-11.425	-12806.7	-4.04618	-10919.7	-2.49429	-10961.8	-1.41216	-18456.6	-1.44024	-16583.2
	214	-10.916	-12236.1	-3.75263	-10127.4	-2.43148	-10685.7	-1.29644	-16944.2	-1.32019	-15201
	213	-10.3094	-11556.2	-3.61916	-9767.22	-2.31082	-10155.4	-1.21967	-15940.8	-1.18237	-13614
	212	-9.59778	-10758.5	-3.69916	-9983.13	-2.26097	-9936.35	-1.166	-15239.3	-1.06135	-12220.6
	211	-8.76464	-9824.57	-3.87908	-10468.7	-2.08661	-9170.11	-0.990292	-12942.9	-0.890191	-10249.9
	210	-7.8508	-8800.22	-4.1107	-11093.8	-1.91095	-8398.11	-0.843315	-11021.9	-0.772853	-8898.79
	209	-6.80913	-7632.57	-4.26458	-11509.1	-1.73106	-7607.55	-0.658264	-8603.36	-0.575941	-6631.5
	208	-5.49029	-6154.25	-4.24011	-11443	-1.46625	-6443.76	-0.558759	-7302.84	-0.416121	-4791.31
	207	-3.98894	-4471.34	-3.82245	-10315.9	-1.08906	-4786.13	-0.396498	-5182.14	-0.20417	-2350.85
	206	-2.33216	-2614.19	-3.05991	-8257.97	-0.685062	-3010.67	-0.215253	-2813.3	-0.0636618	-733.016
	205	-0.53337	-597.872	-1.83848	-4961.62	-0.117796	-517.681	0.0391696	511.937	0.128531	1479.93
	204	1.07253	1202.23	-0.319286	-861.676	0.431037	1894.29	0.344982	4508.83	0.280942	3234.83
	203	2.42218	2715.1	1.62491	4385.24	0.943184	4145.05	0.655204	8563.36	0.473423	5451.09
	202	3.34577	3750.39	4.06384	10967.3	1.47867	6498.35	0.877334	11466.6	0.671952	7736.99
	201	3.91294	4386.14	7.22013	19485.4	1.95539	8593.43	1.0954	14316.6	0.859465	9896.07
	200	4.16543	4669.16	10.9833	29641.3	2.37518	10438.3	1.2076	15783.1	1.02319	11781.2
	199	4.19078	4697.58	15.099	40748.6	2.81512	12371.7	1.28077	16739.4	1.10989	12779.5
	198	4.02785	4514.95	18.7632	50637.2	3.16939	13928.7	1.36316	17816.2	1.15924	13347.8
	197	3.83739	4301.45	21.3786	57695.6	3.34718	14710	1.35444	17702.3	1.18008	13587.7
	196	3.52417	3950.35	22.6212	61049	3.46812	15241.5	1.29838	16969.5	1.14619	13197.5
	195	3.29534	3693.85	22.8232	61594.2	3.47459	15269.9	1.22101	15958.4	1.09044	12555.5
	194	3.05839	3428.24	22.0937	59625.4	3.37253	14821.4	1.04622	13673.8	1.01033	11633.2
	193	2.96557	3324.21	20.7269	55936.8	3.21599	14133.4	0.870097	11372	0.858132	9880.72
	192	2.93865	3294.02	18.6927	50447.1	2.92575	12857.9	0.709589	9274.16	0.809438	9320.04
	191	3.09234	3466.31	16.1003	43450.9	2.63779	11592.4	0.575938	7527.38	0.722248	8316.11
	190	3.37125	3778.94	12.9842	35041.1	2.33936	10280.9	0.49384	6454.38	0.652051	7507.85
	189	3.6974	4144.53	9.71756	26225.3	1.95222	8579.51	0.413867	5409.15	0.465787	5363.17
	188	3.97249	4452.89	6.4157	17314.4	1.58224	6953.51	0.274312	3585.2	0.346624	3991.1
	187	4.13991	4640.56	3.42488	9242.91	1.25222	5503.18	0.136206	1780.18	0.23457	2700.89
	186	4.15867	4661.58	0.885716	2390.33	0.774087	3401.91	-0.0142588	-186.359	0.151491	1744.3
	185	4.03419	4522.06	-1.05517	-2847.66	0.378297	1662.52	-0.144603	-1889.92	0.0890033	1024.8
	184	3.78506	4242.8	-2.2748	-6139.14	0.129104	567.378	-0.210138	-2746.45	-0.0163148	-187.852
	183	3.37117	3778.86	-2.89312	-7807.82	-0.254918	-1120.3	-0.255454	-3338.73	-0.128192	-1476.02
	182	2.82782	3169.79	-3.09431	-8350.8	-0.448947	-1973.01	-0.249174	-3256.65	-0.21583	-2485.11
	181	2.25054	2522.7	-2.8797	-7771.61	-0.648075	-2848.12	-0.385193	-5034.38	-0.282842	-3256.7
	180	1.53467	1720.26	-2.39864	-6473.35	-0.791639	-3479.05	-0.420438	-5495.03	-0.225235	-2593.4

## Sheet: Fig. 2b
FTIR
	Wavenumber (cm-1)	PSMα1	PSMα1 (normalized)		PSMα3	PSMα3 (normalized)		PSMα4	PSMα4 (normalized)		PSMβ1	PSMβ1(normalized)		PSMβ2	PSMβ2 (normalized)
	1700.07	0.00137	0.00809741		0	0		-0.05081	0.00185156		0.0012	0.00462713		0.03289	0.184444
	1699.11	0.00275	0.00738814		0.01718	0.00859		-0.04499	0.00226301		0.00169	0.00651654		0.03611	0.202501
	1698.15	0.00354	0.00910219		0.0359	0.01795		-0.03835	0.000800055		0.00258	0.00994833		0.03888	0.218035
	1697.18	0.0028	0.00833383		0.05777	0.028885		-0.03119	0.00116579		0.00676	0.0260662		0.04131	0.231662
	1696.22	0.00162	0.00780188		0.08357	0.041785		-0.02405	0.00148582		0.01097	0.0422997		0.04349	0.243887
	1695.25	0.00372	0.00839293		0.11194	0.05597		-0.01764	0.00146296		0.0151	0.0582247		0.04495	0.252075
	1694.29	0.00295	0.0091613		0.14031	0.070155		-0.01257	0.00130295		0.01883	0.0726074		0.04545	0.254879
	1693.32	0.0022	0.00715172		0.16714	0.08357		-0.009	0.00052575		0.02191	0.0844837		0.0455	0.255159
	1692.36	0.0032	0.00709262		0.19258	0.09629		-0.00661	0.00139438		0.02434	0.0938536		0.04578	0.256729
	1691.39	0.00104	0.00614694		0.21721	0.108605		-0.00484	0.00214872		0.02629	0.101373		0.04639	0.26015
	1690.43	0.00391	0.00656067		0.24174	0.12087		-0.00313	0.00258303		0.02805	0.108159		0.04701	0.263627
	1689.47	0.00291	0.00715172		0.26655	0.133275		-0.00113	0.00486891		0.02996	0.115524		0.04742	0.265926
	1688.5	0.00205	0.00797919		0.29158	0.14579		0.00117	0.00724621		0.03223	0.124277		0.04774	0.267721
	1687.54	0.00122	0.00839293		0.31679	0.158395		0.00364	0.0128923		0.03477	0.134071		0.04821	0.270357
	1686.57	0.00027	0.00927951		0.34272	0.17136		0.00632	0.0174183		0.0374	0.144212		0.04891	0.274282
	1685.61	0.00094	0.0114664		0.3701	0.18505		0.0094	0.022493		0.04009	0.154585		0.04974	0.278937
	1684.64	0.00238	0.014067		0.39874	0.19937		0.01301	0.0297392		0.04293	0.165536		0.05074	0.284545
	1683.68	0.00362	0.0213961		0.42715	0.213575		0.01697	0.0387912		0.04594	0.177142		0.05221	0.292788
	1682.72	0.00452	0.0267155		0.45349	0.226745		0.02091	0.0477976		0.04899	0.188903		0.05406	0.303163
	1681.75	0.00558	0.0329807		0.47712	0.23856		0.02468	0.0564153		0.05211	0.200933		0.05593	0.31365
	1680.79	0.00734	0.0433832		0.49837	0.249185		0.02829	0.0646673		0.05549	0.213966		0.05764	0.323239
	1679.82	0.00972	0.0574502		0.51803	0.259015		0.03184	0.0727821		0.05914	0.22804		0.05915	0.331707
	1678.86	0.01212	0.0716354		0.53679	0.268395		0.03549	0.0811256		0.06273	0.241883		0.06044	0.338941
	1677.89	0.014	0.0827472		0.55573	0.277865		0.03948	0.0902462		0.06601	0.254531		0.06161	0.345502
	1676.93	0.01559	0.0921449		0.57594	0.28797		0.04405	0.100693		0.06916	0.266677		0.06297	0.353129
	1675.97	0.01794	0.106035		0.5984	0.2992		0.04927	0.112625		0.07265	0.280134		0.06469	0.362775
	1675	0.02172	0.128376		0.6232	0.3116		0.05496	0.125631		0.07682	0.296213		0.0666	0.373486
	1674.04	0.02621	0.154915		0.65004	0.32502		0.06078	0.138935		0.08153	0.314375		0.06842	0.383692
	1673.07	0.03026	0.178852		0.67904	0.33952		0.06648	0.151965		0.08641	0.333192		0.07005	0.392833
	1672.11	0.03354	0.198239		0.71133	0.355665		0.07199	0.16456		0.09124	0.351816		0.07161	0.401581
	1671.14	0.03624	0.214197		0.74822	0.37411		0.07735	0.176812		0.09594	0.369939		0.07328	0.410947
	1670.18	0.03873	0.228914		0.79125	0.395625		0.08267	0.188973		0.10049	0.387484		0.0751	0.421153
	1669.22	0.04103	0.242508		0.84199	0.420995		0.08805	0.201271		0.10492	0.404565		0.077	0.431808
	1668.25	0.04288	0.253443		0.90039	0.450195		0.09358	0.213912		0.10926	0.4213		0.07886	0.442239
	1667.29	0.04427	0.261658		0.9652	0.4826		0.0994	0.227216		0.11361	0.438074		0.08071	0.452613
	1666.32	0.04548	0.26881		1.03561	0.517805		0.10567	0.241548		0.11812	0.455464		0.08267	0.463605
	1665.36	0.04658	0.275312		1.11277	0.556385		0.11248	0.257115		0.12283	0.473625		0.08465	0.474708
	1664.39	0.04752	0.280868		1.19887	0.599435		0.11982	0.273893		0.12765	0.492211		0.08613	0.483008
	1663.43	0.04848	0.286542		1.2953	0.64765		0.12771	0.291929		0.13253	0.511028		0.08653	0.485251
	1662.47	0.04968	0.293634		1.39984	0.69992		0.13613	0.311176		0.13736	0.529652		0.08587	0.48155
	1661.5	0.05128	0.303091		1.50596	0.75298		0.1447	0.330766		0.14196	0.54739		0.08475	0.475269
	1660.54	0.05337	0.315444		1.60713	0.803565		0.15287	0.349441		0.14613	0.563469		0.08362	0.468932
	1659.57	0.05586	0.330161		1.70017	0.850085		0.16016	0.366105		0.14973	0.57735		0.08252	0.462764
	1658.61	0.05841	0.345233		1.78361	0.891805		0.1663	0.38014		0.15256	0.588263		0.08124	0.455585
	1657.64	0.06066	0.358532		1.85568	0.92784		0.17125	0.391455		0.15439	0.595319		0.07963	0.446557
	1656.68	0.06237	0.368639		1.91399	0.956995		0.17504	0.400119		0.15502	0.597748		0.07783	0.436463
	1655.72	0.06373	0.376677		1.95643	0.978215		0.17762	0.406016		0.15441	0.595396		0.07635	0.428163
	1654.75	0.06521	0.385425		1.98304	0.99152		0.17888	0.408897		0.15278	0.589111		0.07551	0.423452
	1653.79	0.06636	0.392222		1.99626	0.99813		0.17885	0.408828		0.15052	0.580396		0.07533	0.422443
	1652.82	0.06614	0.390921		2	1		0.17791	0.406679		0.14806	0.570911		0.07564	0.424181
	1651.86	0.06488	0.383474		1.99693	0.998465		0.17664	0.403776		0.1458	0.562196		0.07633	0.428051
	1650.89	0.06389	0.377623		1.9867	0.99335		0.17531	0.400736		0.14401	0.555294		0.07742	0.434163
	1649.93	0.06343	0.374904		1.96762	0.98381		0.17391	0.397536		0.14274	0.550397		0.07903	0.443192
	1648.97	0.06312	0.373072		1.93839	0.969195		0.17257	0.394473		0.14185	0.546965		0.08126	0.455698
	1648	0.063	0.372362		1.89992	0.94996		0.17176	0.392621		0.1411	0.544073		0.08377	0.469773
	1647.04	0.06326	0.373899		1.85581	0.927905		0.1721	0.393398		0.14039	0.541336		0.08613	0.483008
	1646.07	0.06393	0.377859		1.81062	0.90531		0.17394	0.397604		0.13999	0.539793		0.08814	0.49428
	1645.11	0.06503	0.384361		1.76755	0.883775		0.17712	0.404873		0.1402	0.540603		0.08976	0.503365
	1644.14	0.06655	0.393345		1.72691	0.863455		0.18123	0.414268		0.14107	0.543958		0.09107	0.510711
	1643.18	0.06808	0.402388		1.68741	0.843705		0.18619	0.425606		0.14255	0.549665		0.09243	0.518338
	1642.22	0.06918	0.408889		1.64772	0.82386		0.19217	0.439276		0.14464	0.557723		0.09427	0.528656
	1641.25	0.06988	0.413027		1.60744	0.80372		0.19937	0.455734		0.14739	0.568327		0.09693	0.543573
	1640.29	0.07081	0.418524		1.56626	0.78313		0.20783	0.475073		0.15082	0.581553		0.10041	0.563089
	1639.32	0.07277	0.430108		1.5231	0.76155		0.21757	0.497337		0.15486	0.597131		0.10448	0.585913
	1638.36	0.0763	0.450972		1.47642	0.73821		0.22876	0.522916		0.15949	0.614984		0.109	0.611261
	1637.39	0.08176	0.483244		1.42541	0.712705		0.24179	0.552701		0.1648	0.635459		0.11391	0.638795
	1636.43	0.08932	0.527927		1.3703	0.68515		0.25716	0.587835		0.17118	0.66006		0.11928	0.66891
	1635.47	0.09883	0.584136		1.31239	0.656195		0.27511	0.628866		0.17911	0.690638		0.12517	0.70194
	1634.5	0.10923	0.645606		1.25403	0.627015		0.29495	0.674218		0.18867	0.727501		0.13132	0.736429
	1633.54	0.11969	0.70743		1.19747	0.598735		0.31543	0.721032		0.19933	0.768605		0.13763	0.771815
	1632.57	0.13051	0.771381		1.14317	0.571585		0.33591	0.767847		0.21048	0.811599		0.14429	0.809163
	1631.61	0.14174	0.837756		1.09063	0.545315		0.35623	0.814296		0.22161	0.854515		0.15113	0.847521
	1630.64	0.1525	0.901354		1.03931	0.519655		0.37604	0.859579		0.2322	0.89535		0.15763	0.883973
	1629.68	0.16146	0.954312		0.98821	0.494105		0.39456	0.901913		0.2417	0.931981		0.16334	0.915994
	1628.71	0.16728	0.988711		0.93684	0.46842		0.41092	0.93931		0.24956	0.962289		0.16826	0.943585
	1627.75	0.16919	1		0.88601	0.443005		0.42419	0.969644		0.2553	0.984422		0.17254	0.967586
	1626.79	0.16745	0.989716		0.83775	0.418875		0.43336	0.990605		0.2586	0.997147		0.17594	0.986653
	1625.82	0.16299	0.963355		0.79328	0.39664		0.43747	1		0.25934	1		0.17796	0.997981
	1624.86	0.1565	0.924996		0.75197	0.375985		0.43588	0.996365		0.25765	0.993483		0.17832	1
	1623.89	0.14845	0.877416		0.713	0.3565		0.42836	0.979176		0.25378	0.978561		0.17714	0.993383
	1622.93	0.13935	0.82363		0.67674	0.33837		0.41543	0.949619		0.24807	0.956544		0.17473	0.979868
	1621.96	0.12964	0.766239		0.644	0.322		0.39835	0.910577		0.24083	0.928627		0.17114	0.959735
	1621	0.11974	0.707725		0.61427	0.307135		0.37834	0.864836		0.23231	0.895774		0.16597	0.930742
	1620.04	0.11021	0.651398		0.58627	0.293135		0.35625	0.814342		0.22274	0.858873		0.1591	0.892216
	1619.07	0.10144	0.599563		0.55912	0.27956		0.33262	0.760326		0.21247	0.819272		0.15118	0.847802
	1618.11	0.0931	0.550269		0.53228	0.26614		0.30773	0.703431		0.20189	0.778476		0.14274	0.800471
	1617.14	0.08438	0.498729		0.50608	0.25304		0.28195	0.644501		0.19124	0.73741		0.13389	0.750841
	1616.18	0.0754	0.445653		0.48172	0.24086		0.25659	0.586532		0.1808	0.697154		0.12524	0.702333
	1615.21	0.06732	0.397896		0.46062	0.23031		0.23345	0.533637		0.17083	0.658711		0.11746	0.658703
	1614.25	0.06051	0.357645		0.44294	0.22147		0.21305	0.487005		0.16127	0.621848		0.11022	0.618102
	1613.29	0.05466	0.323069		0.42823	0.214115		0.19478	0.445242		0.15187	0.585602		0.10329	0.57924
	1612.32	0.04958	0.293043		0.41619	0.208095		0.17796	0.406794		0.14248	0.549395		0.09707	0.544358
	1611.36	0.04503	0.26615		0.40654	0.20327		0.1622	0.370768		0.13316	0.513457		0.09162	0.513795
	1610.39	0.04087	0.241563		0.3986	0.1993		0.14738	0.336892		0.12416	0.478754		0.08647	0.484915
	1609.43	0.03725	0.220167		0.39148	0.19574		0.13353	0.305232		0.1158	0.446518		0.08127	0.455754
	1608.46	0.03416	0.201903		0.38453	0.192265		0.12074	0.275996		0.10841	0.418023		0.07625	0.427602
	1607.5	0.03133	0.185176		0.37754	0.18877		0.1091	0.249389		0.10214	0.393846		0.07188	0.403096
	1606.54	0.02877	0.170046		0.37014	0.18507		0.09864	0.225478		0.09689	0.373602		0.0684	0.38358
	1605.57	0.02665	0.157515		0.36252	0.18126		0.08935	0.204243		0.09239	0.35625		0.06553	0.367485
	1604.61	0.02483	0.146758		0.35499	0.177495		0.0812	0.185613		0.08824	0.340248		0.06287	0.352568
	1603.64	0.023	0.135942		0.34818	0.17409		0.07403	0.169223		0.08414	0.324439		0.06021	0.337651
	1602.68	0.02122	0.125421		0.34205	0.171025		0.06766	0.154662		0.08003	0.308591		0.05763	0.323183
	1601.71	0.01981	0.117087		0.33614	0.16807		0.06188	0.14145		0.07608	0.29336		0.05526	0.309892
	1600.75	0.01885	0.111413		0.33032	0.16516		0.05659	0.129357		0.07251	0.279594		0.05318	0.298228
	1599.79	0.01826	0.107926		0.325	0.1625		0.05182	0.118454		0.06938	0.267525		0.0513	0.287685

## Sheet: Fig. 2c
Thermal Stability of fibrils
	Temp. °C	PSMα1	PSMα3 (2h)	PSMα3 (7d)	PSMα4	βPSM1	βPSM2
	25	-14.9327	-10.9674	-10.4335	-18.1919	-14.4937	-15.3694
	25.1	-15.0957	-10.855	-10.4335	-17.765	-15.1599	-14.3404
	25.2	-14.7208	-10.345	-10.3436	-17.6757	-15.4495	-14.6352
	25.3	-15.2403	-11.0522	-9.29039	-17.7697	-14.4903	-15.2766
	25.4	-15.3649	-10.5931	-10.7379	-17.6635	-14.8621	-14.4603
	25.5	-15.1526	-11.8514	-9.36428	-17.7628	-14.8776	-14.8597
	25.6	-15.2351	-11.6786	-10.2116	-17.6474	-14.6138	-14.7004
	25.7	-15.1082	-10.6507	-10.1004	-17.9396	-14.8208	-14.975
	25.8	-15.3692	-10.0277	-9.65934	-17.4028	-15.5379	-15.3249
	25.9	-15.0602	-10.1523	-9.21258	-18.019	-14.6085	-14.9404
	26	-15.3958	-10.9765	-9.54616	-17.9193	-14.294	-15.0212
	26.1	-14.7007	-10.5283	-9.81737	-17.8663	-15.2421	-14.8165
	26.2	-14.9957	-10.004	-9.61414	-17.8405	-14.9902	-15.1808
	26.3	-15.04	-10.18	-10.18	-17.6972	-14.8206	-14.7147
	26.4	-14.8543	-11.6494	-9.27252	-18.03	-14.8695	-15.2445
	26.5	-15.5176	-10.9202	-10.1308	-17.6856	-14.7274	-15.1309
	26.6	-15.2492	-10.9051	-9.33321	-17.8561	-14.3595	-15.1233
	26.7	-14.9748	-10.9255	-9.27816	-17.6387	-15.5655	-14.9327
	26.8	-15.2468	-10.4768	-8.97241	-17.9351	-15.1992	-14.922
	26.9	-15.1306	-11.2689	-9.8522	-18.2453	-14.908	-15.0345
	27	-14.9563	-10.9944	-8.53066	-18.3959	-14.9448	-15.048
	27.1	-15.6481	-11.1642	-9.34569	-18.1301	-15.6853	-15.4364
	27.2	-15.6111	-11.5188	-10.9765	-17.9095	-15.5534	-15.0899
	27.3	-14.9178	-11.815	-10.5283	-18.0421	-15.0338	-15.0616
	27.4	-15.3407	-11.0942	-10.004	-17.8202	-14.461	-14.884
	27.5	-15.1332	-11.5806	-8.66519	-18.6717	-15.394	-14.6348
	27.6	-15.2914	-11.5474	-9.20072	-17.9623	-15.2367	-14.2516
	27.7	-15.2071	-12.068	-10.0854	-17.884	-14.9023	-15.1704
	27.8	-15.4249	-13.0248	-9.36168	-18.2794	-14.6004	-14.8725
	27.9	-15.6063	-13.3141	-9.92296	-17.8014	-15.8942	-14.7867
	28	-15.4107	-10.8224	-9.13986	-18.253	-13.8369	-15.0309
	28.1	-14.9878	-11.7996	-8.61456	-18.2339	-14.6201	-15.2587
	28.2	-15.4031	-12.1727	-9.52902	-17.8866	-15.2666	-15.0737
	28.3	-15.2832	-11.1523	-9.22027	-18.0597	-14.8564	-15.2946
	28.4	-15.2327	-11.6389	-8.65561	-17.718	-15.3993	-14.9383
	28.5	-15.2937	-12.2015	-8.4905	-18.2	-14.6653	-14.8751
	28.6	-15.0032	-12.7599	-9.96567	-17.5488	-14.5814	-14.6833
	28.7	-14.9211	-12.0757	-8.11261	-18.0022	-14.8972	-14.8318
	28.8	-15.1548	-12.3415	-9.21578	-18.1353	-15.5065	-15.0547
	28.9	-14.9039	-12.4754	-8.83605	-18.1115	-15.7365	-15.3673
	29	-15.1442	-12.6808	-8.78354	-18.0059	-15.3343	-15.1705
	29.1	-15.2193	-12.1715	-9.80778	-18.0478	-14.4594	-14.5639
	29.2	-15.1917	-12.5532	-8.97891	-18.233	-13.9315	-15.1528
	29.3	-14.9804	-11.7793	-8.11738	-17.9033	-14.444	-15.019
	29.4	-14.9133	-12.1029	-8.98264	-17.8815	-14.7375	-15.1609
	29.5	-14.8321	-12.7748	-8.94363	-18.515	-13.9728	-14.766
	29.6	-15.1028	-12.0623	-9.21189	-17.9856	-14.4137	-15.0451
	29.7	-15.4596	-11.6608	-10.238	-18.0479	-14.1624	-14.8842
	29.8	-14.9188	-11.7872	-9.98759	-18.4611	-14.5357	-15.3943
	29.9	-15.1844	-12.1201	-9.56696	-18.2093	-14.7234	-15.1859
	30	-15.2642	-12.9046	-9.08036	-18.0767	-14.6535	-15.2101
	30.1	-15.3974	-12.1524	-8.56084	-18.0539	-14.3577	-15.3645
	30.2	-15.1786	-13.0776	-9.41028	-18.1915	-14.4736	-15.5036
	30.3	-15.7225	-12.8414	-8.98771	-17.6086	-14.109	-15.1184
	30.4	-15.3205	-12.0444	-9.56169	-18.2502	-14.8027	-15.4527
	30.5	-15.3955	-12.5106	-9.24793	-17.9843	-14.4728	-15.1691
	30.6	-15.5109	-12.7123	-8.25498	-18.3097	-14.8224	-15.4155
	30.7	-15.1875	-13.1198	-8.81038	-18.2126	-14.6925	-15.3581
	30.8	-14.77	-13.5998	-10.6881	-18.3453	-14.9939	-15.0896
	30.9	-14.9481	-12.7026	-8.63771	-18.2062	-14.2897	-15.2526
	31	-15.1189	-11.8491	-8.77406	-18.1455	-14.2569	-14.9191
	31.1	-14.7461	-12.7643	-9.48693	-18.0146	-15.1325	-15.3365
	31.2	-15.3813	-13.0138	-9.17577	-18.0222	-14.6943	-15.175
	31.3	-14.8073	-13.4972	-9.60869	-18.1804	-13.955	-14.9008
	31.4	-15.4595	-12.98	-9.80232	-18.0762	-14.8909	-15.1352
	31.5	-14.88	-13.288	-8.1963	-17.9064	-14.8557	-14.6337
	31.6	-15.2735	-13.5888	-8.44739	-18.4918	-14.1261	-15.0341
	31.7	-15.1936	-12.1196	-7.88063	-18.2081	-14.2494	-15.0657
	31.8	-14.9338	-13.4788	-7.44706	-18.5081	-14.6677	-15.2958
	31.9	-15.1088	-13.7121	-9.45077	-17.9661	-14.7997	-15.0544
	32	-15.4726	-13.6538	-8.98461	-18.1189	-14.7392	-15.5454
	32.1	-15.2413	-13.9636	-8.13692	-17.7406	-15.2334	-15.0888
	32.2	-15.1036	-12.6517	-8.99133	-17.9375	-14.3982	-15.0013
	32.3	-15.0398	-12.768	-8.44476	-17.9514	-14.2562	-14.9762
	32.4	-14.822	-13.2753	-9.51545	-18.2453	-15.0942	-15.1293
	32.5	-15.5422	-14.4255	-9.82723	-18.1162	-14.5565	-15.2467
	32.6	-15.4872	-14.0726	-9.86393	-17.9874	-14.2226	-14.8133
	32.7	-15.3509	-13.049	-9.76217	-17.951	-15.1808	-14.9382
	32.8	-15.2697	-12.8727	-9.53538	-18.1561	-14.0091	-14.8865
	32.9	-15.3045	-13.743	-9.67216	-18.1285	-14.6227	-15.5544
	33	-15.4041	-12.9514	-9.47823	-17.9911	-15.0246	-15.4832
	33.1	-15.2036	-12.9503	-9.23284	-18.0538	-15.0371	-15.1671
	33.2	-15.2571	-13.4374	-8.8252	-17.698	-15.1428	-14.8694
	33.3	-15.2291	-13.5218	-8.56931	-18.4946	-15.1996	-15.2278
	33.4	-15.3292	-12.801	-8.60281	-18.3295	-14.4142	-15.3153
	33.5	-15.4044	-13.4338	-8.86462	-18.3738	-14.2299	-15.1549
	33.6	-15.6656	-12.2582	-8.68998	-17.2531	-15.1202	-14.8161
	33.7	-15.4208	-12.64	-8.92293	-17.9511	-15.4762	-15.2695
	33.8	-15.0309	-13.2829	-8.85105	-17.8228	-14.7406	-15.2379
	33.9	-15.3035	-13.329	-8.01883	-17.8458	-15.1118	-15.4426
	34	-15.6451	-13.2954	-8.01883	-17.8523	-15.0231	-15.0699
	34.1	-15.1938	-13.6259	-8.61857	-17.9271	-15.3207	-14.8163
	34.2	-15.3907	-12.8943	-9.0807	-17.5866	-14.23	-15.4314
	34.3	-15.1013	-12.9914	-9.2931	-17.7623	-15.0295	-15.1523
	34.4	-15.0563	-13.4112	-8.47853	-17.6482	-14.7611	-15.3545
	34.5	-15.5361	-13.8543	-9.13978	-17.7369	-14.6689	-15.6329
	34.6	-14.9032	-12.7222	-9.48109	-17.9501	-15.1236	-15.0547
	34.7	-15.1861	-12.1299	-9.65658	-17.7807	-14.6319	-15.3652
	34.8	-15.4095	-13.5273	-9.52484	-18.3852	-14.6745	-14.8355
	34.9	-15.0428	-13.3059	-9.38586	-17.8891	-14.9111	-15.5022
	35	-15.0076	-12.9818	-9.36561	-17.3341	-14.3032	-15.5236
	35.1	-15.4853	-13.0308	-10.8492	-18.2757	-15.4811	-14.8455
	35.2	-15.2453	-13.2666	-9.82752	-17.8625	-14.33	-15.2933
	35.3	-15.4565	-12.7869	-9.29253	-17.6622	-14.9782	-15.0589
	35.4	-14.9926	-12.929	-8.96342	-18.2987	-14.6749	-15.3418
	35.5	-15.2328	-12.996	-9.2965	-18.058	-14.7232	-15.4514
	35.6	-14.7191	-13.1615	-9.28186	-17.9789	-14.4297	-15.2662
	35.7	-15.3276	-13.2579	-8.82212	-17.5167	-14.8613	-15.1162
	35.8	-15.1903	-13.6144	-8.78905	-18.0438	-15.0157	-15.1177
	35.9	-15.0454	-13.4197	-10.4114	-18.2069	-14.8079	-15.3119
	36	-15.1061	-13.3908	-9.45271	-17.8676	-14.3373	-15.2769
	36.1	-15.7012	-13.5161	-9.09013	-17.7698	-14.1018	-15.0474
	36.2	-15.1093	-13.7953	-9.58122	-17.7869	-14.1561	-15.259
	36.3	-15.2501	-14.4908	-8.87966	-17.4521	-14.2325	-15.1229
	36.4	-15.1721	-13.1548	-10.1897	-17.3314	-14.4133	-15.1542
	36.5	-15.1816	-13.1277	-9.24229	-18.022	-14.4444	-15.768
	36.6	-15.0022	-13.4325	-9.37661	-17.4945	-14.8188	-15.7526
	36.7	-15.2355	-12.8797	-9.37137	-18.5213	-14.4026	-15.4042
	36.8	-15.2656	-12.5803	-9.52871	-17.9313	-14.2066	-15.9587
	36.9	-14.9966	-13.1076	-9.3569	-17.5488	-15.0021	-15.3721
	37	-15.4626	-12.9505	-8.57308	-18.1358	-13.982	-16.0497
	37.1	-15.2909	-13.3618	-8.77299	-17.9241	-15.2043	-15.3758
	37.2	-15.0454	-13.0387	-9.36906	-18.29	-14.8934	-15.3476
	37.3	-15.2894	-13.7855	-10.1965	-17.9115	-14.3359	-15.1246
	37.4	-15.1832	-13.0591	-9.19196	-17.2403	-14.7169	-15.6634
	37.5	-14.9481	-12.822	-8.35444	-17.8606	-13.8144	-15.3604
	37.6	-15.5201	-13.3901	-10.0573	-17.7544	-15.0832	-15.5326
	37.7	-15.1215	-12.9762	-8.2345	-17.8114	-15.6287	-15.3534
	37.8	-15.0924	-13.3135	-8.28717	-17.8813	-14.2732	-15.2455
	37.9	-15.3314	-13.0602	-8.06856	-17.79	-15.2421	-16.1613
	38	-15.3617	-12.6936	-9.05074	-18.0373	-15.1154	-15.3441
	38.1	-15.16	-12.4428	-9.45177	-17.9157	-15.0116	-15.4359
	38.2	-14.9732	-13.0623	-10.0376	-17.4737	-14.3432	-15.4415
	38.3	-15.2439	-12.9969	-10.2094	-17.883	-14.6452	-15.2257
	38.4	-15.229	-13.4209	-9.76471	-17.3582	-14.6782	-15.7986
	38.5	-15.2806	-12.2026	-9.86849	-18.1395	-14.7143	-15.5764
	38.6	-15.4471	-12.3803	-7.56979	-17.4952	-14.8043	-15.5764
	38.7	-15.3033	-12.7357	-8.56403	-18.0759	-13.5668	-15.2673
	38.8	-15.4127	-12.3449	-10.2582	-17.6657	-14.8555	-15.7836
	38.9	-15.4482	-12.8377	-9.47525	-17.817	-15.5629	-15.4716
	39	-15.3808	-13.0648	-8.31301	-18.1799	-15.2879	-15.5269
	39.1	-15.6044	-13.4754	-9.74892	-18.2504	-13.4793	-15.2325
	39.2	-14.9933	-13.0434	-9.71381	-17.7994	-13.9618	-15.1037
	39.3	-15.226	-12.0843	-10.4862	-17.6039	-14.5478	-15.6102
	39.4	-15.3419	-12.6011	-9.73946	-18.1201	-15.0239	-15.9637
	39.5	-14.9239	-13.0672	-9.14851	-17.9845	-14.4823	-15.4803
	39.6	-15.2376	-12.6344	-10.2283	-17.9482	-14.8548	-15.1507
	39.7	-15.611	-12.1431	-10.1045	-18.0908	-14.0655	-15.8664
	39.8	-15.5212	-12.0409	-9.24068	-17.7322	-14.5997	-15.4873
	39.9	-15.5574	-12.9257	-9.84016	-18.3071	-14.2962	-15.695
	40	-15.2535	-11.9219	-9.74073	-17.9955	-13.9994	-15.466
	40.1	-15.2506	-11.5909	-8.55339	-17.6842	-14.3917	-15.3914
	40.2	-14.8094	-12.5275	-9.26942	-17.8463	-15.2453	-15.3174
	40.3	-15.0679	-11.9844	-9.56907	-17.9329	-14.0639	-15.8352
	40.4	-15.0611	-12.0693	-10.0449	-17.7715	-14.01	-15.4763
	40.5	-15.3727	-12.1458	-9.31435	-17.9225	-13.8463	-14.9212
	40.6	-15.5309	-12.3921	-10.4468	-17.6466	-15.2119	-15.6504
	40.7	-15.3759	-12.0628	-8.20262	-17.7797	-14.5028	-15.4773
	40.8	-15.097	-12.2903	-9.48938	-17.6522	-14.399	-15.5125
	40.9	-15.3075	-11.6925	-9.27798	-17.6896	-14.4305	-15.7279
	41	-15.2224	-12.2089	-10.1562	-17.409	-13.8527	-15.3676
	41.1	-15.022	-11.8553	-9.4231	-17.6385	-14.3046	-15.4562
	41.2	-15.4186	-12.0263	-9.04669	-18.0459	-14.2608	-15.4585
	41.3	-15.5689	-10.9755	-9.13784	-17.5112	-14.8305	-15.2959
	41.4	-15.5279	-12.0341	-10.4186	-17.7165	-14.9552	-15.0622
	41.5	-15.372	-12.0341	-9.70658	-18.3563	-15.0957	-15.1443
	41.6	-15.2035	-12.7373	-9.18178	-17.836	-14.5692	-15.1443
	41.7	-15.1844	-11.9811	-9.35352	-18.1292	-14.7285	-15.3638
	41.8	-15.2282	-12.0603	-9.03267	-18.3239	-15.2022	-15.3433
	41.9	-15.3831	-12.5916	-8.14089	-17.9667	-14.9879	-15.0799
	42	-15.1841	-12.2699	-10.1716	-17.7871	-15.1167	-15.206
	42.1	-15.4745	-12.2388	-8.92093	-17.816	-14.549	-15.1461
	42.2	-15.0378	-11.0414	-9.42634	-17.9496	-14.6364	-15.2008
	42.3	-15.318	-10.7616	-10.1445	-17.696	-13.8863	-15.2743
	42.4	-15.2359	-11.7783	-9.8914	-17.8645	-13.5949	-15.272
	42.5	-14.8156	-11.8413	-9.69809	-17.4986	-15.0993	-15.2775
	42.6	-14.9411	-12.2326	-10.2945	-18.3823	-14.4153	-14.9324
	42.7	-14.8561	-11.3078	-8.2447	-17.8536	-14.5545	-15.2496
	42.8	-14.8934	-11.6502	-10.4567	-17.6659	-15.2523	-15.3425
	42.9	-15.1988	-11.473	-10.1086	-17.5262	-14.5661	-15.293
	43	-14.7239	-12.1988	-9.84658	-17.7398	-14.3786	-15.1822
	43.1	-15.047	-11.7894	-9.43306	-17.8071	-15.2218	-14.8801
	43.2	-14.7354	-11.8644	-8.25917	-17.7484	-16.1522	-15.1452
	43.3	-15.2364	-11.5295	-10.1869	-17.823	-14.3792	-15.3224
	43.4	-15.4345	-11.6784	-9.02136	-17.8158	-14.5327	-14.8286
	43.5	-14.7323	-10.7857	-9.24893	-17.5749	-14.7745	-15.4403
	43.6	-14.9401	-10.9508	-9.26336	-17.4249	-14.0397	-14.9205
	43.7	-14.8445	-10.8626	-11.4717	-17.702	-14.0747	-15.3934
	43.8	-15.1677	-10.9311	-9.65216	-17.0639	-14.2329	-15.5876
	43.9	-15.1901	-10.6359	-9.51825	-17.9299	-14.5654	-15.4847
	44	-14.8113	-11.1301	-9.61461	-18.0426	-14.3131	-15.2859
	44.1	-15.58	-11.2257	-9.60466	-17.9208	-13.8488	-15.1102
	44.2	-15.3216	-10.7442	-8.72949	-17.5762	-14.6622	-15.042
	44.3	-15.2276	-11.5369	-10.1485	-17.7053	-14.2993	-14.8831
	44.4	-15.141	-10.6226	-9.75471	-17.8253	-14.7206	-14.8012
	44.5	-15.5443	-10.6455	-9.7135	-17.5524	-13.9518	-15.6138
	44.6	-14.9616	-10.8327	-8.91071	-17.7473	-14.8023	-14.8904
	44.7	-15.1004	-11.1287	-9.99788	-17.6917	-14.2476	-15.1128
	44.8	-15.0696	-10.7039	-9.49461	-17.3591	-14.8274	-15.2528
	44.9	-14.8293	-10.8135	-8.88041	-17.4169	-15.4958	-15.5156
	45	-15.3504	-9.16992	-10.506	-17.6493	-15.1311	-15.0731
	45.1	-14.9614	-11.0577	-10.1533	-17.9097	-15.297	-15.2367
	45.2	-15.0199	-11.8318	-10.218	-17.1328	-14.4135	-15.3764
	45.3	-14.6135	-11.1487	-9.84327	-18.0278	-13.6547	-15.2509
	45.4	-15.0186	-10.221	-10.2323	-17.687	-13.6931	-15.1196
	45.5	-14.6193	-11.1151	-9.8227	-17.984	-15.0828	-15.0406
	45.6	-14.7207	-11.1684	-9.28673	-17.8898	-13.8364	-15.3048
	45.7	-15.0179	-10.623	-9.92398	-17.4474	-15.5838	-14.9052
	45.8	-15.0158	-10.6349	-10.389	-17.3679	-15.1543	-14.8516
	45.9	-15.1451	-11.0664	-9.60709	-17.2964	-14.6964	-15.3005
	46	-15.0324	-10.4245	-9.32146	-17.4474	-13.8932	-14.724
	46.1	-14.624	-10.6033	-9.4081	-17.7938	-14.2325	-14.9767
	46.2	-14.9368	-10.2075	-9.97317	-17.5637	-15.0287	-15.4274
	46.3	-15.2031	-10.4994	-10.6547	-17.2797	-13.8519	-15.6168
	46.4	-14.8978	-10.4863	-8.98265	-17.9319	-14.7814	-15.6272
	46.5	-14.8224	-10.8653	-10.365	-17.4788	-14.3323	-15.5616
	46.6	-15.1822	-9.86034	-9.50072	-17.4741	-14.7836	-15.2851
	46.7	-14.7648	-9.59635	-10.6065	-17.1554	-13.8256	-15.0153
	46.8	-15.0167	-9.81839	-8.93738	-17.6403	-14.2552	-15.3552
	46.9	-14.8437	-9.67224	-9.2471	-17.0886	-14.9327	-15.1419
	47	-14.8135	-10.0148	-9.66841	-17.3158	-13.8121	-15.0997
	47.1	-14.6561	-9.43088	-9.59542	-17.5373	-14.2255	-15.4122
	47.2	-15.2489	-9.77196	-9.71588	-17.479	-14.1486	-15.1025
	47.3	-14.7235	-10.5702	-9.06221	-17.4773	-14.228	-14.9789
	47.4	-14.9265	-10.5942	-11.4837	-17.4211	-14.1308	-15.3383
	47.5	-14.9176	-9.99761	-9.70878	-17.4174	-14.3753	-15.3453
	47.6	-14.8499	-11.1626	-8.97587	-17.176	-14.6291	-14.8984
	47.7	-15.1652	-11.2019	-10.0181	-17.0438	-14.725	-15.2105
	47.8	-15.0496	-10.4745	-9.17757	-17.7554	-14.6097	-15.6806
	47.9	-14.7191	-11.1387	-10.1932	-17.5474	-14.1649	-15.3758
	48	-14.7981	-10.9673	-9.45116	-17.6292	-13.8359	-14.9411
	48.1	-14.4429	-10.9389	-9.25752	-17.3117	-14.1562	-15.1938
	48.2	-14.6265	-10.6952	-9.92911	-17.3011	-15.0321	-15.4073
	48.3	-14.6265	-10.1983	-9.98514	-17.7494	-15.2135	-15.041
	48.4	-14.5485	-10.0553	-9.23659	-17.3765	-14.549	-15.285
	48.5	-15.1176	-10.9778	-8.66358	-17.5633	-13.9911	-15.5268
	48.6	-14.3341	-10.5384	-8.02779	-17.921	-14.326	-15.1394
	48.7	-15.2265	-9.72592	-8.6184	-17.0641	-14.6517	-15.088
	48.8	-14.6304	-9.78239	-10.6288	-17.4526	-14.337	-15.1652
	48.9	-15.0451	-9.53294	-8.97935	-17.612	-14.3946	-15.0607
	49	-15.0192	-9.53294	-11.0693	-17.962	-13.7762	-14.8769
	49.1	-14.798	-10.016	-9.4774	-17.2253	-14.4198	-14.821
	49.2	-14.6299	-10.2859	-9.9749	-17.5406	-13.9254	-14.821
	49.3	-14.8035	-10.4528	-9.34234	-17.5082	-13.0361	-15.2865
	49.4	-14.9401	-9.99131	-8.98091	-17.4291	-13.6	-15.0127
	49.5	-15.3026	-10.1867	-9.19197	-17.7647	-13.5695	-14.8057
	49.6	-14.9796	-9.97998	-7.20494	-17.299	-13.6492	-14.9815
	49.7	-15.0326	-9.92262	-8.5646	-17.4085	-14.6376	-14.9628
	49.8	-14.9978	-9.55471	-10.0032	-17.3946	-14.6376	-15.2835
	49.9	-14.7055	-9.24796	-9.52428	-16.9449	-14.8516	-15.5241
	50	-14.8495	-9.83445	-10.3031	-17.2975	-13.6501	-15.0529
	50.1	-14.6128	-9.16141	-9.9602	-17.0165	-14.6546	-14.7035
	50.2	-14.866	-9.58776	-10.034	-17.451	-14.4576	-15.2686
	50.3	-14.6379	-9.69257	-10.1174	-17.28	-13.8222	-15.243
	50.4	-14.9497	-9.61608	-9.24241	-17.4244	-14.5756	-15.1281
	50.5	-15.4236	-9.24266	-9.90593	-17.1791	-13.7251	-15.0872
	50.6	-15.3314	-9.21378	-9.06396	-17.8703	-14.0228	-14.8519
	50.7	-15.2227	-9.15388	-10.7588	-17.6027	-13.0393	-15.2423
	50.8	-14.7879	-8.43519	-9.11158	-17.3794	-13.0307	-14.8503
	50.9	-15.0362	-8.77964	-9.47785	-17.3892	-14.344	-15.2688
	51	-14.3663	-9.08428	-10.1564	-17.1926	-13.8269	-15.3986
	51.1	-14.7765	-8.9201	-8.19431	-17.5255	-14.0671	-15.0029
	51.2	-14.5955	-9.66861	-10.233	-17.253	-14.2832	-15.0808
	51.3	-14.5279	-8.54437	-8.57126	-17.3507	-14.7148	-15.1339
	51.4	-14.8404	-9.18692	-9.07259	-16.8232	-14.4969	-14.8069
	51.5	-14.8049	-9.7646	-9.82148	-17.247	-14.2068	-15.1375
	51.6	-14.4332	-9.00654	-9.23107	-17.5239	-12.9177	-15.0422
	51.7	-14.6468	-9.05272	-8.74319	-17.1463	-14.75	-15.391
	51.8	-14.6957	-8.97731	-9.98739	-17.1331	-14.293	-15.1665
	51.9	-14.5269	-8.75628	-8.48704	-17.6078	-13.9681	-14.7543
	52	-14.6835	-8.77058	-7.79424	-17.3232	-13.2029	-15.2161
	52.1	-15.1295	-7.96561	-8.08807	-17.253	-14.1009	-15.08
	52.2	-14.8593	-7.99057	-9.53085	-17.2021	-13.9416	-15.111
	52.3	-14.6944	-8.43872	-8.41505	-17.4479	-14.7467	-14.4509
	52.4	-14.8679	-8.53288	-9.85337	-17.3101	-13.5185	-14.7999
	52.5	-14.5653	-8.81769	-9.2389	-17.1276	-14.4332	-14.9487
	52.6	-14.6236	-8.14883	-10.0252	-16.8434	-13.6796	-14.6107
	52.7	-14.3498	-7.79391	-9.22223	-17.4256	-14.2629	-15.1333
	52.8	-14.7805	-8.3142	-8.24016	-17.1049	-13.5224	-14.407
	52.9	-14.7257	-8.27701	-9.19048	-17.3884	-14.0589	-14.7206
	53	-14.541	-7.65041	-9.62711	-17.138	-14.2446	-14.9805
	53.1	-14.7476	-7.97762	-8.79381	-16.7139	-14.101	-14.5816
	53.2	-14.665	-7.88132	-9.143	-17.1255	-13.4405	-14.731
	53.3	-14.6571	-8.44684	-8.50719	-16.9223	-13.5242	-14.6681
	53.4	-14.432	-8.06689	-8.58268	-16.9373	-14.0216	-14.6406
	53.5	-14.4575	-8.66625	-8.79108	-17.1123	-13.5771	-14.9731
	53.6	-14.4974	-7.74726	-8.88006	-16.7307	-14.1477	-14.7176
	53.7	-14.8205	-7.48005	-9.05144	-17.4875	-14.7049	-14.9912
	53.8	-14.5468	-8.00795	-9.30439	-17.0219	-14.1817	-14.4509
	53.9	-14.1855	-7.99562	-8.44265	-17.4322	-13.4894	-14.7015
	54	-14.6404	-7.32237	-9.51827	-16.8314	-14.7726	-14.6777
	54.1	-14.2367	-7.40212	-8.54201	-17.1949	-13.3395	-14.8249
	54.2	-14.5632	-7.5793	-7.91252	-17.2511	-13.4818	-15.2811
	54.3	-14.4828	-8.01503	-8.59856	-17.2582	-13.9189	-15.0592
	54.4	-14.6069	-8.01503	-8.48999	-16.9672	-13.4983	-14.9885
	54.5	-14.4152	-7.21108	-8.48999	-16.364	-13.8091	-14.7522
	54.6	-14.3466	-7.57182	-8.55172	-17.0792	-14.1422	-14.5991
	54.7	-14.8645	-7.20832	-8.20614	-16.674	-14.3	-15.3376
	54.8	-14.5957	-7.38583	-9.46619	-17.2908	-14.1414	-14.8732
	54.9	-14.6044	-6.93451	-9.49135	-17.1672	-13.9227	-14.9573
	55	-14.2903	-7.15415	-9.74966	-17.0696	-13.6816	-15.1966
	55.1	-14.0548	-7.26375	-10.2587	-16.9296	-14.2564	-14.7285
	55.2	-14.4797	-7.22272	-8.76851	-16.6762	-13.1391	-15.0861
	55.3	-14.4748	-7.211	-9.47397	-17.2575	-13.2037	-15.307
	55.4	-14.536	-7.63712	-9.67023	-17.56	-13.186	-15.0285
	55.5	-14.6155	-7.15056	-8.77439	-16.9002	-13.2987	-14.6111
	55.6	-14.3494	-7.29565	-7.74327	-16.8276	-13.8492	-14.8579
	55.7	-14.473	-6.91718	-8.52062	-17.1653	-13.8679	-14.7581
	55.8	-14.3021	-6.9312	-8.368	-17.1825	-13.4786	-15.1728
	55.9	-14.5346	-6.85069	-9.44661	-16.8365	-12.3607	-15.1094
	56	-14.4374	-6.39028	-8.21877	-16.4254	-12.9511	-15.0518
	56.1	-14.4157	-6.1364	-8.94639	-16.8403	-14.1199	-14.3653
	56.2	-14.6584	-7.17532	-7.7406	-17.0556	-14.0663	-14.6298
	56.3	-14.4771	-6.72288	-8.65547	-16.6875	-13.4656	-14.841
	56.4	-14.6397	-6.35628	-7.82384	-16.702	-13.162	-14.7413
	56.5	-14.402	-6.22077	-7.60639	-17.6653	-13.9717	-14.3761
	56.6	-14.1584	-6.61228	-9.03375	-16.8061	-12.9282	-14.5735
	56.7	-14.1584	-6.21041	-8.48187	-16.7679	-13.5102	-14.4083
	56.8	-14.2498	-6.31618	-8.10124	-17.2665	-13.8016	-14.4104
	56.9	-14.0282	-6.86422	-9.14589	-17.1195	-13.6721	-14.2357
	57	-14.4601	-6.10184	-9.55181	-17.1502	-13.509	-14.5481
	57.1	-14.4579	-6.23129	-7.2763	-17.1995	-13.6894	-14.7237
	57.2	-14.3248	-6.16543	-8.43434	-17.1067	-13.3338	-14.8302
	57.3	-14.2321	-6.64351	-7.75686	-16.6247	-13.6321	-14.254
	57.4	-13.9609	-6.44707	-7.88737	-16.8825	-14.2147	-14.6385
	57.5	-14.3266	-5.971	-8.19034	-17.1715	-13.7963	-15.0429
	57.6	-13.876	-6.72745	-8.95477	-16.7207	-14.236	-14.9992
	57.7	-14.2866	-6.15115	-8.64972	-16.8667	-13.3267	-14.1594
	57.8	-13.6476	-5.89885	-7.72313	-16.8108	-13.8657	-14.7696
	57.9	-14.0302	-5.46292	-9.39906	-16.858	-13.8118	-14.4377
	58	-14.4478	-5.73084	-8.39478	-16.7251	-13.356	-15.1057
	58.1	-14.5919	-5.5838	-8.74772	-16.9169	-13.747	-15.0169
	58.2	-14.3667	-5.74745	-7.86107	-16.8637	-14.4915	-14.5724
	58.3	-14.5615	-6.14093	-7.51475	-16.6965	-13.5822	-14.6581
	58.4	-14.1533	-5.96483	-8.33652	-17.1577	-13.1653	-14.6203
	58.5	-14.1859	-5.54321	-8.34847	-16.7672	-14.0576	-14.4781
	58.6	-13.949	-5.82599	-10.2092	-16.7178	-13.1503	-14.4325
	58.7	-13.9835	-5.94916	-9.81945	-17.1108	-12.7453	-14.6288
	58.8	-14.2952	-5.40064	-10.1559	-16.5842	-12.6792	-14.5121
	58.9	-14.2744	-5.89622	-8.43763	-16.7059	-13.2053	-14.8079
	59	-14.3009	-5.56288	-9.02926	-16.7625	-13.4169	-14.9249
	59.1	-14.2552	-5.7771	-8.85304	-16.9085	-13.8276	-15.133
	59.2	-13.9404	-5.37778	-7.6093	-16.7806	-14.0968	-14.6325
	59.3	-14.1867	-6.10265	-8.4271	-16.9419	-13.7351	-14.4535
	59.4	-14.3507	-5.56151	-9.92578	-16.463	-13.3855	-14.3708
	59.5	-13.8832	-5.71389	-9.08362	-16.4246	-12.8101	-14.6757
	59.6	-13.7914	-5.71389	-8.17539	-16.8741	-13.3431	-14.5738
	59.7	-14.2211	-5.3173	-8.21744	-16.4367	-12.9277	-14.6166
	59.8	-14.1468	-5.43675	-9.16818	-17.1088	-12.9151	-14.3751
	59.9	-13.9817	-5.30152	-8.53677	-16.73	-12.7403	-14.9044
	60	-14.3246	-4.58806	-9.12164	-17.063	-13.2802	-14.2348
	60.1	-14.187	-4.852	-9.79635	-16.4477	-12.8458	-14.2367
	60.2	-14.5749	-6.2416	-8.45269	-16.8373	-13.6779	-14.3413
	60.3	-13.8745	-5.36638	-7.19318	-16.6761	-14.0888	-14.2146
	60.4	-13.8745	-5.61566	-8.58938	-17.486	-13.7363	-14.2424
	60.5	-14.2301	-5.69694	-9.70356	-16.9945	-12.9768	-14.4805
	60.6	-14.4714	-5.43606	-8.76231	-17.094	-13.2188	-14.7191
	60.7	-13.9403	-5.20209	-8.09589	-16.8104	-13.4727	-14.0894
	60.8	-13.8581	-5.23328	-9.20613	-16.4062	-14.0181	-14.3773
	60.9	-13.8581	-4.85382	-9.76575	-16.5082	-13.5058	-14.8635
	61	-13.9226	-5.37917	-7.98553	-16.6362	-14.23	-14.165
	61.1	-14.0899	-4.18548	-9.2041	-16.5593	-13.219	-14.1422
	61.2	-14.055	-4.53528	-10.1322	-16.7009	-13.5114	-14.1422
	61.3	-13.6898	-4.86241	-8.11855	-16.9601	-13.4353	-14.4332
	61.4	-14.4745	-4.89899	-8.63322	-16.3539	-13.1236	-13.9718
	61.5	-13.7632	-5.06253	-8.35173	-16.7188	-12.9999	-14.4503
	61.6	-14.4736	-5.31889	-9.88383	-16.4364	-13.4911	-14.4503
	61.7	-13.6939	-4.96216	-9.29506	-16.4002	-12.7844	-14.0263
	61.8	-13.4235	-5.20255	-9.07884	-16.6622	-13.407	-13.8092
	61.9	-13.7485	-4.95638	-9.10084	-16.6728	-13.0882	-14.1256
	62	-14.0893	-4.7088	-8.54401	-16.1817	-13.7467	-14.5055
	62.1	-13.9451	-5.55828	-8.16496	-16.528	-13.6129	-14.5167
	62.2	-13.7333	-4.54634	-7.46575	-16.597	-13.1592	-14.2756
	62.3	-14.1439	-4.62283	-8.83612	-16.324	-13.1039	-14.1536
	62.4	-13.9907	-4.84141	-8.76919	-16.5097	-13.4049	-14.5192
	62.5	-13.8938	-5.39997	-9.77906	-16.408	-13.4049	-14.4815
	62.6	-14.3232	-5.01355	-9.18427	-16.7308	-12.5709	-14.4247
	62.7	-14.4301	-4.48077	-9.43909	-16.8627	-12.7085	-14.5243
	62.8	-14.2018	-4.58429	-8.43809	-16.7216	-13.0924	-14.319
	62.9	-13.8774	-4.8702	-9.39843	-16.5394	-13.3455	-14.5251
	63	-14.6648	-5.27513	-9.70443	-16.5617	-13.6557	-14.5078
	63.1	-14.1572	-5.00628	-8.7783	-16.2984	-13.931	-14.66
	63.2	-14.2504	-4.73941	-9.39922	-16.5795	-12.5192	-14.2578
	63.3	-13.7761	-5.46923	-9.70647	-16.6292	-12.5192	-14.0124
	63.4	-13.7851	-4.93848	-9.46317	-16.5992	-13.7155	-13.713
	63.5	-13.6968	-4.02206	-7.76143	-16.9821	-13.0859	-14.703
	63.6	-14.1137	-4.10716	-8.10514	-16.484	-13.4075	-14.2933
	63.7	-13.692	-4.24756	-8.31452	-16.3605	-13.2831	-14.0453
	63.8	-13.7946	-4.13416	-8.70661	-16.7395	-12.6726	-14.0298
	63.9	-13.6059	-3.78233	-9.44677	-16.5814	-14.0924	-14.346
	64	-13.8751	-3.66352	-8.49779	-16.5637	-13.5617	-14.036
	64.1	-13.7542	-3.32665	-7.89867	-16.8485	-13.7034	-14.2059
	64.2	-13.6439	-3.18209	-8.49623	-16.6026	-12.6077	-14.2309
	64.3	-13.5557	-3.69982	-8.87149	-16.5511	-12.8368	-14.3157
	64.4	-14.136	-4.26982	-8.7034	-16.5858	-12.7032	-14.1202
	64.5	-13.9761	-4.26982	-7.96031	-16.8304	-12.9959	-14.265
	64.6	-14.2396	-3.92029	-7.97415	-16.6603	-12.9959	-14.6424
	64.7	-13.729	-4.17538	-8.741	-16.375	-12.2892	-14.1054
	64.8	-13.7457	-4.3643	-9.42688	-16.3997	-12.8956	-14.1269
	64.9	-13.8005	-4.58097	-9.37033	-16.7697	-13.5618	-14.1413
	65	-13.5533	-4.4475	-9.02021	-16.8006	-12.3696	-14.3436
	65.1	-13.9921	-4.06638	-8.78129	-16.4046	-12.8703	-14.6829
	65.2	-13.8926	-4.14265	-9.453	-16.5937	-13.3743	-13.8962
	65.3	-13.9449	-3.74457	-8.02472	-16.357	-12.8067	-13.9485
	65.4	-13.4005	-3.74457	-8.7349	-16.8314	-12.4817	-14.1717
	65.5	-13.6536	-4.59728	-9.28712	-16.607	-12.4734	-14.5647
	65.6	-13.7105	-3.70209	-8.6271	-16.863	-13.7058	-13.4884
	65.7	-13.7907	-4.71821	-7.67098	-16.7394	-12.8091	-14.2032
	65.8	-13.9244	-4.74672	-8.85868	-16.6902	-12.081	-14.2755
	65.9	-13.9905	-3.96788	-9.26524	-16.4676	-12.5135	-14.1367
	66	-14.0448	-3.52676	-8.81483	-16.0796	-12.7246	-14.1165
	66.1	-13.9322	-4.38685	-8.81483	-16.6282	-12.5977	-13.8733
	66.2	-13.9251	-4.42344	-8.34855	-16.14	-12.734	-13.6369
	66.3	-13.4495	-3.37435	-8.43162	-16.2181	-12.0824	-13.6749
	66.4	-13.5471	-3.74646	-8.88153	-16.5536	-12.4455	-14.2065
	66.5	-14.0115	-3.74646	-7.14355	-16.2515	-12.954	-14.1515
	66.6	-13.5575	-3.90981	-8.64222	-16.784	-12.1543	-13.9418
	66.7	-13.6584	-3.1372	-8.78743	-15.9961	-11.9986	-13.7627
	66.8	-13.8289	-3.52194	-9.08779	-16.5579	-12.0971	-13.9382
	66.9	-13.6953	-3.52562	-9.50398	-16.6097	-12.4297	-14.0027
	67	-13.7117	-3.71831	-9.73233	-15.9458	-13.1957	-13.5
	67.1	-13.7036	-4.01937	-8.41914	-16.1023	-12.0214	-14.033
	67.2	-14.0567	-3.71621	-9.51799	-16.4523	-12.6613	-13.7899
	67.3	-13.3869	-3.28865	-8.23278	-16.5738	-13.5847	-14.2935
	67.4	-13.7509	-3.96879	-8.91002	-16.4257	-12.6076	-14.2235
	67.5	-13.89	-3.63854	-9.06222	-16.2288	-13.3152	-13.9918
	67.6	-13.8323	-3.90253	-9.09376	-16.4442	-12.964	-13.6225
	67.7	-13.8972	-3.6015	-8.84542	-16.4848	-13.0121	-13.9566
	67.8	-13.8977	-3.36523	-9.46279	-16.5553	-12.4736	-13.9844
	67.9	-13.4346	-3.00905	-8.50263	-16.6828	-13.153	-13.9624
	68	-14.0643	-2.66425	-8.43518	-17.0255	-12.7511	-13.9607
	68.1	-14.1384	-3.27077	-6.83544	-16.4827	-12.9996	-13.8793
	68.2	-13.7738	-3.331	-7.78362	-16.3423	-13.4581	-13.8855
	68.3	-13.8181	-3.3468	-8.05629	-16.0466	-12.3737	-14.4466
	68.4	-13.4153	-2.73376	-8.71369	-16.2524	-12.8497	-13.7251
	68.5	-13.2754	-2.73171	-9.255	-16.1919	-13.0469	-13.9963
	68.6	-13.8139	-3.12189	-8.40593	-16.1196	-12.9337	-14.0997
	68.7	-13.6412	-3.40948	-8.54549	-16.2721	-12.4908	-14.0762
	68.8	-13.7508	-3.31111	-8.95731	-16.4182	-12.6739	-14.1016
	68.9	-13.9966	-2.9623	-9.24864	-16.1231	-13.3266	-14.051
	69	-13.7081	-2.93441	-8.32267	-16.4834	-13.2118	-14.4826
	69.1	-13.5787	-3.04923	-8.95859	-16.1466	-12.7067	-14.3148
	69.2	-13.5686	-2.29895	-9.33712	-16.1466	-13.1388	-14.3038
	69.3	-13.8149	-2.29895	-9.24046	-16.3449	-12.8865	-13.7038
	69.4	-13.8087	-2.46084	-8.43468	-16.2988	-13.0358	-13.94
	69.5	-13.4955	-2.99296	-8.03779	-16.3217	-13.2723	-13.962
	69.6	-13.5116	-2.73103	-8.6259	-15.929	-12.6428	-14.1228
	69.7	-13.4604	-2.76164	-8.60438	-16.0663	-12.6211	-13.8924
	69.8	-13.6419	-2.65133	-8.60438	-16.5982	-12.2445	-14.0237
	69.9	-13.7139	-2.53857	-7.94305	-15.721	-12.1549	-13.6406
	70	-13.4633	-2.88481	-8.40855	-16.3132	-12.6616	-13.743
	70.1	-13.5544	-3.30079	-9.88309	-16.2098	-12.8887	-14.0007
	70.2	-14.0239	-2.83538	-7.7534	-16.5607	-12.0956	-13.7999
	70.3	-14.0239	-2.35087	-8.34979	-16.2576	-12.8672	-13.7999
	70.4	-13.6188	-2.22287	-9.11532	-16.22	-12.9092	-13.8539
	70.5	-13.578	-2.22287	-8.14982	-15.7817	-12.9092	-14.0061
	70.6	-13.887	-1.82585	-7.56353	-15.9338	-13.2966	-14.0476
	70.7	-13.8668	-1.65794	-8.98035	-16.2235	-13.1862	-13.779
	70.8	-13.322	-1.84684	-8.13901	-15.5859	-13.1862	-14.0836
	70.9	-13.3436	-2.47576	-8.04135	-15.6055	-13.0306	-14.2745
	71	-13.3712	-3.00384	-8.4742	-16.5194	-12.9876	-13.8184
	71.1	-13.3878	-2.36737	-9.32732	-16.3447	-13.2648	-13.6968
	71.2	-13.3878	-1.66324	-7.39722	-15.887	-12.2441	-14.1049
	71.3	-13.5575	-1.66881	-7.39722	-16.1352	-13.4495	-14.0796
	71.4	-13.5413	-1.33322	-7.27766	-16.1572	-12.9137	-13.7234
	71.5	-13.3018	-1.76935	-7.92765	-15.8767	-13.4584	-13.4803
	71.6	-13.1581	-3.34915	-7.90285	-16.0182	-13.1236	-13.4796
	71.7	-13.4954	-2.96576	-7.90285	-15.7547	-12.151	-13.7865
	71.8	-14.0329	-2.90052	-6.79629	-16.1889	-13.3993	-13.4185
	71.9	-13.7614	-2.90052	-8.56925	-16.3621	-13.3993	-14.05
	72	-13.5599	-2.35898	-8.45073	-16.6681	-13.4832	-13.7558
	72.1	-13.4318	-1.81422	-7.8075	-15.928	-12.957	-13.7554
	72.2	-13.446	-2.08664	-7.92489	-15.928	-12.5055	-13.8376
	72.3	-13.4201	-1.70139	-8.11735	-16.2679	-12.5055	-13.4103
	72.4	-13.883	-1.61959	-6.99603	-16.3535	-12.5556	-13.6898
	72.5	-13.6302	-1.52466	-7.45734	-15.7145	-12.6509	-13.4411
	72.6	-13.534	-1.52466	-7.84515	-15.8697	-12.93	-14.0093
	72.7	-13.4459	-1.62613	-8.50425	-16.2552	-12.6259	-13.7614
	72.8	-13.2981	-1.69592	-7.41824	-16.3742	-12.6405	-14.0321
	72.9	-13.6053	-1.44028	-8.1654	-16.2133	-12.7496	-13.7221
	73	-13.4164	-2.21302	-7.73503	-15.6332	-12.8737	-13.5935
	73.1	-13.7309	-0.902049	-8.27442	-16.1705	-12.7768	-13.5687
	73.2	-13.5849	-1.16857	-7.20262	-16.1653	-13.0023	-13.8467
	73.3	-13.1834	-1.60651	-7.86816	-16.1136	-13.4632	-13.8799
	73.4	-13.2277	-1.77414	-6.82787	-16.0489	-12.9365	-13.6281
	73.5	-13.6824	-2.15153	-7.00998	-16.302	-12.4541	-13.8331
	73.6	-13.144	-2.12277	-7.24837	-15.4544	-13.2719	-13.406
	73.7	-13.4922	-2.67959	-7.28911	-15.9642	-12.9793	-13.8527
	73.8	-13.1756	-2.70785	-7.89629	-16.3212	-12.0514	-13.6774
	73.9	-13.4167	-2.64554	-7.63868	-16.0165	-13.2959	-14.0965
	74	-13.5925	-3.04188	-7.6425	-16.3224	-12.97	-13.3396
	74.1	-13.4433	-2.14763	-6.94154	-16.1078	-13.3162	-13.6469
	74.2	-13.3857	-2.10841	-7.59042	-16.005	-12.4629	-13.6699
	74.3	-13.4461	-1.71113	-7.84743	-16.1554	-11.7011	-13.3709
	74.4	-13.3639	-1.43284	-6.83416	-16.1507	-12.4321	-13.5699
	74.5	-13.6605	-1.45218	-6.83024	-16.3566	-12.6023	-13.8249
	74.6	-13.6605	-1.27605	-8.50402	-15.9809	-11.7705	-13.6967
	74.7	-13.3751	-0.913181	-8.50402	-15.8527	-11.9901	-13.7905
	74.8	-13.3043	-2.1854	-6.7016	-16.1741	-12.3651	-13.4419
	74.9	-13.3805	-1.6615	-7.36637	-16.4224	-12.6308	-14.4124
	75	-13.6526	-1.94572	-7.0128	-16.2052	-12.7514	-13.7661
	75.1	-13.5228	-2.02796	-6.26769	-15.8551	-12.3326	-13.6687
	75.2	-12.9872	-2.02303	-7.00366	-15.572	-13.1871	-13.3223
	75.3	-13.423	-1.50588	-6.93607	-15.7735	-12.8739	-13.6868
	75.4	-13.4731	-2.05221	-8.1408	-15.8711	-11.7857	-13.5663
	75.5	-13.3972	-2.34937	-7.64391	-16.2641	-11.8399	-13.6006
	75.6	-13.5324	-1.8362	-7.66936	-16.1354	-12.1446	-13.7078
	75.7	-13.1579	-2.27936	-7.76149	-15.7684	-12.6283	-13.7078
	75.8	-13.2252	-1.85938	-7.46998	-15.6531	-12.6497	-13.6757
	75.9	-13.0752	-1.96025	-7.33089	-15.9425	-12.6693	-13.4875
	76	-13.14	-1.02304	-7.98933	-15.6216	-12.0316	-13.2459
	76.1	-13.6042	-2.23155	-7.76708	-16.1835	-11.6109	-13.224
	76.2	-13.4903	-1.83313	-7.84601	-15.9062	-12.6471	-13.4238
	76.3	-13.7062	-1.66584	-7.73551	-15.8468	-12.4389	-13.7048
	76.4	-13.466	-2.17978	-7.24235	-16.1438	-11.8627	-13.2115
	76.5	-12.9544	-1.64346	-6.99307	-16.1108	-12.3237	-13.382
	76.6	-13.4138	-1.53957	-6.95598	-16.3531	-12.0348	-13.4189
	76.7	-12.9808	-1.87536	-6.74539	-16.1929	-12.5941	-13.571
	76.8	-13.4521	-1.80234	-6.90756	-16.3221	-12.4402	-13.537
	76.9	-13.4807	-1.67216	-5.68692	-15.8678	-12.4591	-13.4813
	77	-13.0185	-2.08952	-6.37614	-16.4286	-12.4714	-13.2591
	77.1	-12.9187	-2.36133	-7.10457	-15.8692	-12.1785	-13.6915
	77.2	-12.9732	-2.53398	-7.16099	-16.111	-12.3624	-13.6607
	77.3	-13.0264	-2.18165	-7.58188	-16.2542	-11.8931	-13.522
	77.4	-13.1444	-1.79838	-6.80604	-15.7271	-11.8931	-13.3653
	77.5	-13.2463	-2.40426	-6.84611	-16.1156	-12.3873	-13.3965
	77.6	-13.2042	-2.27569	-7.43828	-16.0333	-11.8775	-13.1121
	77.7	-13.1594	-2.05392	-6.65281	-16.0932	-12.746	-12.9629
	77.8	-12.903	-2.5793	-7.35102	-16.2118	-11.7108	-13.4085
	77.9	-12.903	-2.61157	-7.5963	-16.2578	-11.697	-13.4906
	78	-12.6008	-2.23974	-7.31591	-15.9882	-12.4251	-13.429
	78.1	-12.8705	-2.56199	-6.79232	-16.2761	-11.2216	-13.3229
	78.2	-12.9809	-3.59104	-6.7799	-15.9713	-11.4672	-13.1663
	78.3	-12.8098	-3.7095	-6.42601	-16.7096	-12.1939	-13.6733
	78.4	-12.8977	-2.6274	-7.63299	-16.241	-12.1939	-13.3752
	78.5	-13.0026	-3.40751	-7.0715	-15.9273	-12.0691	-13.4708
	78.6	-13.0425	-2.93457	-6.98485	-15.9043	-12.1987	-13.4708
	78.7	-13.0425	-2.93457	-7.29027	-15.7871	-12.2666	-13.2349
	78.8	-13.0231	-3.28164	-8.04091	-16.0015	-12.0859	-13.3656
	78.9	-13.1999	-3.17507	-7.68656	-15.8836	-12.4537	-13.3656
	79	-13.1999	-4.16319	-6.05291	-16.278	-11.9922	-13.0404
	79.1	-12.9076	-3.98614	-6.63411	-15.7756	-12.0828	-13.106
	79.2	-12.716	-3.88211	-6.23948	-15.4881	-12.0828	-13.4756
	79.3	-12.7416	-4.23877	-7.54987	-15.8263	-11.6087	-13.8221
	79.4	-12.7962	-4.21901	-6.27412	-15.8142	-11.31	-13.1175
	79.5	-13.122	-4.48469	-7.54985	-15.7068	-11.6899	-13.4493
	79.6	-13.1	-4.06526	-7.24671	-16.0625	-11.4048	-13.4493
	79.7	-13.1	-4.17622	-7.52122	-15.5673	-11.4048	-13.4641
	79.8	-12.9632	-5.12829	-6.56359	-15.9302	-11.7819	-13.4577
	79.9	-12.6802	-5.13079	-7.45483	-16.2274	-12.2843	-13.5019
	80	-12.9516	-4.92572	-7.11648	-15.7433	-12.3858	-13.5019
	80.1	-12.7893	-5.01839	-6.6974	-16.1086	-12.3858	-13.5864
	80.2	-13.1461	-4.96326	-6.55943	-15.6912	-13.0468	-13.2928
	80.3	-13.1679	-5.17233	-6.83674	-15.9725	-11.5507	-13.288
	80.4	-13.1929	-5.17233	-6.8744	-15.9725	-11.5507	-13.3428
	80.5	-12.9376	-4.95574	-7.02444	-15.6372	-11.6023	-13.4975
	80.6	-13.4246	-4.95574	-6.53466	-15.9346	-12.0136	-13.1369
	80.7	-13.3658	-4.95909	-6.03279	-16.0318	-12.0136	-12.8738
	80.8	-12.6347	-5.0129	-6.36519	-16.0318	-11.7201	-12.9582
	80.9	-12.6193	-5.10833	-6.33435	-16.0439	-11.5143	-13.2034
	81	-12.3155	-5.91662	-6.86447	-15.8933	-11.9282	-13.3659
	81.1	-12.6565	-6.44042	-6.57705	-15.9893	-11.9282	-13.5063
	81.2	-12.5628	-5.9004	-7.32098	-15.7657	-11.8233	-13.4794
	81.3	-12.7467	-6.58796	-7.97575	-15.8461	-11.5505	-13.3549
	81.4	-12.6498	-5.48453	-6.57082	-16.2346	-11.2445	-13.3549
	81.5	-12.84	-6.01011	-7.14847	-16.2346	-11.4842	-13.2504
	81.6	-12.806	-5.6413	-7.52134	-16.1077	-12.0958	-12.8631
	81.7	-12.8611	-5.40047	-7.04378	-15.8574	-11.922	-12.8631
	81.8	-12.8401	-5.41591	-6.74102	-15.938	-11.603	-12.8631
	81.9	-12.9852	-5.76268	-6.86198	-15.938	-10.9959	-13.4821
	82	-12.7124	-5.82392	-6.99086	-16.1826	-12.0895	-13.2066
	82.1	-12.382	-5.82392	-7.33677	-16.1826	-11.0024	-13.0493
	82.2	-12.7837	-5.38853	-6.39368	-15.9099	-10.5163	-12.8734
	82.3	-12.4949	-5.6954	-6.77789	-15.9099	-11.17	-12.9976
	82.4	-12.3995	-5.42497	-6.0677	-15.5637	-11.1493	-13.1813
	82.5	-12.7001	-5.75371	-6.85258	-15.4903	-11.3627	-12.8331
	82.6	-12.9328	-5.48052	-6.46212	-15.9599	-10.5527	-13.4558
	82.7	-12.7154	-5.32082	-7.51344	-16.1759	-10.5527	-13.0146
	82.8	-12.6189	-5.15543	-7.12541	-15.5978	-10.5527	-13.5596
	82.9	-12.688	-4.95088	-6.73902	-15.972	-10.6157	-13.3813
	83	-12.2553	-5.16227	-6.5222	-15.972	-11.1462	-12.9257
	83.1	-12.6223	-5.80372	-6.58616	-15.8897	-11.4484	-13.2838
	83.2	-13.0146	-5.01181	-7.37654	-16.0285	-11.0595	-13.2842
	83.3	-12.7653	-5.21556	-6.51552	-15.7598	-11.8333	-13.0097
	83.4	-12.4816	-5.17315	-6.49313	-15.5933	-11.6905	-13.4162
	83.5	-12.729	-5.39144	-6.48967	-15.7594	-11.6905	-13.414
	83.6	-12.8215	-5.04779	-7.03543	-15.7029	-11.5249	-13.0887
	83.7	-12.4774	-5.25568	-6.12873	-15.7943	-11.9214	-13.1263
	83.8	-12.591	-4.94497	-5.908	-15.5458	-11.9214	-12.8199
	83.9	-12.1647	-5.13506	-7.44363	-15.7825	-12.1734	-13.0749
	84	-12.5034	-5.51922	-6.78636	-15.7395	-10.8146	-13.2001
	84.1	-12.4294	-5.02811	-7.0715	-15.7098	-10.8146	-13.2839
	84.2	-12.4184	-4.62172	-6.38235	-15.983	-10.9874	-12.7716
	84.3	-12.3139	-4.66049	-6.27121	-16.0359	-10.8491	-13.1354
	84.4	-12.2081	-4.98817	-6.43707	-15.7579	-11.0042	-13.1354
	84.5	-12.4188	-5.02775	-6.99479	-15.8771	-11.2824	-13.0584
	84.6	-12.2485	-4.69063	-7.29557	-16.3952	-11.4995	-13.2234
	84.7	-12.2485	-4.39799	-7.57271	-15.7235	-10.3259	-13.1596
	84.8	-12.3592	-4.6874	-7.58721	-15.4286	-10.3259	-12.7172
	84.9	-12.375	-4.64373	-7.61465	-15.465	-11.5279	-12.6945
	85	-12.7681	-4.48881	-6.89176	-15.6885	-11.5279	-12.6945
	85.1	-12.3906	-4.50473	-6.59618	-15.1119	-11.5279	-12.4966
	85.2	-12.3906	-4.78352	-6.69512	-15.0164	-11.2132	-12.8828
	85.3	-12.4359	-4.99827	-6.74898	-15.8385	-11.2132	-12.9784
	85.4	-12.5604	-4.70966	-7.1281	-15.5431	-10.1189	-13.3354
	85.5	-12.5699	-5.16642	-7.1281	-15.4372	-10.6451	-12.7364
	85.6	-12.5699	-4.57997	-7.44656	-15.6519	-10.8595	-12.7364
	85.7	-12.4898	-4.70426	-6.3682	-15.5329	-10.8595	-12.9832
	85.8	-12.1443	-4.88226	-7.16902	-15.907	-10.8223	-12.8931
	85.9	-11.7559	-4.88226	-7.16902	-15.9633	-10.8223	-12.9043
	86	-11.8271	-4.48613	-6.29395	-15.8535	-10.2072	-13.3045
	86.1	-12.3727	-4.78245	-6.91448	-15.7577	-10.2072	-12.868
	86.2	-12.3271	-4.72705	-6.59058	-15.4604	-9.80519	-13.1742
	86.3	-11.9189	-4.92633	-6.59058	-15.6806	-10.7414	-12.7983
	86.4	-12.2281	-4.7579	-6.56245	-16.0323	-11.1889	-13.0829
	86.5	-12.4178	-4.12954	-5.92877	-16.0705	-10.8616	-12.7379
	86.6	-12.4567	-4.42334	-7.52001	-15.7966	-11.3413	-13.1545
	86.7	-12.5761	-4.86693	-6.29372	-15.4762	-11.0358	-12.9227
	86.8	-12.5761	-4.63289	-6.61351	-15.5844	-10.744	-12.4863
	86.9	-12.3072	-4.77459	-6.44871	-16.2096	-9.77377	-12.8688
	87	-12.4067	-4.31711	-6.0086	-15.995	-9.81477	-12.6646
	87.1	-11.8737	-4.347	-6.76565	-15.6773	-10.1924	-12.5138
	87.2	-12.2223	-4.86543	-7.0756	-15.7919	-9.95343	-12.7265
	87.3	-12.1226	-4.57625	-6.78368	-16.0037	-10.796	-12.9271
	87.4	-12.0051	-4.95139	-6.48465	-15.7117	-10.0011	-13.2353
	87.5	-12.0735	-5.01447	-5.96391	-15.4759	-10.9943	-12.4071
	87.6	-12.2504	-4.88509	-6.60416	-15.6923	-10.7757	-13.0737
	87.7	-12.1769	-4.94655	-6.60416	-15.6923	-10.7757	-12.7659
	87.8	-12.165	-4.63998	-6.73155	-15.7043	-10.2958	-12.8732
	87.9	-12.6325	-4.89809	-6.65631	-15.4433	-9.81742	-12.7453
	88	-12.2119	-4.56327	-5.66312	-15.1269	-9.32009	-12.7966
	88.1	-12.234	-4.34307	-6.14716	-15.342	-8.88577	-13.0323
	88.2	-12.2491	-4.1689	-6.9422	-15.3414	-10.1088	-12.9474
	88.3	-11.8788	-3.90676	-6.21392	-16.2327	-10.1967	-12.6632
	88.4	-12.5626	-4.08765	-7.47558	-16.2261	-10.61	-12.5437
	88.5	-12.0769	-4.65737	-6.15371	-16.024	-10.0436	-12.9733
	88.6	-12.2629	-4.18857	-7.11107	-15.549	-10.0436	-12.839
	88.7	-12.3513	-4.27823	-7.11107	-16.1124	-9.18712	-13.1748
	88.8	-12.2775	-3.74615	-6.55489	-15.5984	-9.18712	-12.664
	88.9	-12.3216	-4.34191	-6.70636	-15.663	-9.18712	-12.748
	89	-12.3976	-4.2782	-6.2649	-15.6846	-10.1139	-12.7926
	89.1	-12.1724	-4.50035	-4.78645	-15.4149	-9.25317	-12.7926
	89.2	-12.1724	-4.35577	-6.31543	-15.754	-9.25317	-12.4307
	89.3	-12.0662	-4.28534	-5.49096	-15.8263	-10.3971	-12.2929
	89.4	-12.1574	-4.43277	-5.65828	-15.6844	-9.51706	-12.968
	89.5	-12.3984	-4.27745	-5.4081	-15.6844	-9.18353	-12.7145
	89.6	-12.079	-4.43761	-6.1857	-15.7396	-10.4548	-12.4587
	89.7	-11.944	-4.26136	-6.54461	-15.5986	-10.4548	-12.0099
	89.8	-11.944	-4.24554	-6.62781	-15.5681	-10.4548	-12.3486
	89.9	-11.944	-4.43706	-5.59102	-15.6031	-10.5495	-12.3909
	90	-12.1453	-4.10343	-5.59102	-15.6833	-10.1782	-12.9362
	90.1	-12.2345	-3.81259	-5.48968	-15.7872	-9.48697	-13.5591
	90.2	-12.2628	-3.83284	-5.80345	-15.8039	-9.42036	-12.9151
	90.3	-12.062	-3.83284	-5.80345	-15.7462	-9.42036	-12.8096
	90.4	-12.0668	-4.20645	-6.69103	-15.9544	-9.42036	-12.8577
	90.5	-12.277	-3.98908	-6.69103	-15.3941	-9.88843	-12.7956
	90.6	-12.1984	-4.8853	-6.69103	-15.3559	-10.0038	-12.6732
	90.7	-11.9145	-4.8853	-7.82157	-15.9868	-9.62766	-12.342
	90.8	-11.8513	-5.07627	-6.56777	-15.5244	-9.66479	-12.342
	90.9	-12.0652	-4.5197	-6.73517	-15.6758	-10.013	-12.6171
	91	-11.988	-5.0176	-7.32534	-15.7001	-9.35702	-12.3895
	91.1	-11.9678	-4.13361	-6.95017	-15.7001	-10.0121	-12.7006
	91.2	-11.8018	-4.13361	-6.95017	-15.496	-9.35828	-12.7917
	91.3	-12.2721	-4.2731	-5.81704	-15.7018	-9.35828	-12.8244
	91.4	-11.9677	-4.57094	-5.87388	-15.3145	-8.94479	-12.4607
	91.5	-12.4806	-5.30052	-6.49412	-15.3145	-8.80347	-12.6271
	91.6	-12.1105	-5.19596	-6.88044	-15.8934	-8.80347	-12.6372
	91.7	-12.3799	-4.76572	-6.76309	-15.5587	-9.08232	-12.4113
	91.8	-12.3799	-4.42699	-6.03054	-15.7203	-9.08232	-12.1111
	91.9	-12.0713	-4.13113	-6.30871	-15.8549	-9.4446	-12.8838
	92	-11.9941	-4.07545	-6.84104	-15.5593	-9.4446	-12.8838
	92.1	-12.2542	-4.89231	-6.50291	-15.6679	-9.00844	-12.4234
	92.2	-12.2133	-4.8945	-6.35774	-15.5081	-9.15508	-12.4234
	92.3	-12.1479	-4.37006	-6.95935	-15.6991	-9.2765	-12.5456
	92.4	-11.8986	-4.31688	-5.8661	-15.7258	-9.61281	-12.7386
	92.5	-11.8374	-4.42166	-5.34733	-15.7282	-9.02566	-12.8675
	92.6	-12.192	-4.34493	-6.09671	-15.6109	-8.4753	-12.5716
	92.7	-11.9795	-4.24373	-5.15145	-15.1778	-8.50491	-12.3039
	92.8	-11.7796	-4.24373	-6.13183	-15.1778	-8.31644	-12.3484
	92.9	-11.7704	-4.22214	-5.84472	-15.1112	-8.31644	-12.3221
	93	-12.0911	-4.58055	-7.0929	-15.8188	-7.9739	-12.1147
	93.1	-12.5358	-4.46524	-6.80153	-15.7508	-8.40944	-12.1147
	93.2	-12.2605	-4.30769	-6.23509	-15.5119	-8.98531	-12.4824
	93.3	-11.9404	-4.48199	-6.98667	-15.6979	-8.61288	-12.6236
	93.4	-12.0331	-4.86785	-5.91764	-15.127	-9.4667	-12.1218
	93.5	-12.0331	-5.0414	-5.71683	-15.1715	-9.4667	-11.8097
	93.6	-12.0331	-4.16166	-6.24859	-15.0487	-9.35844	-12.5542
	93.7	-11.7784	-4.16166	-6.76081	-15.9033	-8.91545	-12.3174
	93.8	-12.4084	-4.12001	-6.24218	-15.9391	-8.856	-12.3174
	93.9	-12.4084	-4.2864	-6.20508	-15.7153	-9.41158	-12.3846
	94	-12.3714	-4.2864	-7.15231	-15.3826	-9.41158	-12.3991
	94.1	-11.8749	-4.63083	-5.67699	-15.5165	-8.28884	-12.2137
	94.2	-11.7906	-4.55578	-5.97529	-15.6503	-8.98032	-12.4595
	94.3	-11.8649	-4.22641	-6.39727	-15.6062	-9.11156	-12.3864
	94.4	-11.9985	-4.36479	-5.54509	-15.8991	-8.66926	-12.3864
	94.5	-11.8267	-5.10149	-6.17476	-15.6543	-8.66926	-12.3864
	94.6	-11.5979	-4.83526	-6.39583	-15.6289	-8.8279	-12.609
	94.7	-11.6543	-4.74605	-6.40605	-15.5802	-8.83794	-12.6666
	94.8	-12.304	-4.46522	-6.61763	-15.9929	-8.12953	-12.6666
	94.9	-12.304	-4.79542	-5.4129	-15.6135	-8.12953	-12.5266
	95	-11.9711	-5.02831	-6.07084	-15.2934	-8.64122	-12.1256

## Sheet: Fig 2e
FTIR fitting
PSMα1
	% secondary structure	Position	intensity	width	integral	Fitting mechanism
Peak 1	64.5815	1625.93	0.54236	22.6422	19.2897	Lorentz
Peak 2	26.3149	1653.79	0.220994	14.9157	5.17778	Lorentz
Peak 3	9.10364	1667.29	0.076453	38.0887	4.57418	Lorentz
PSMα3
Peak 1	43.9346	1636.46	0.235083	28.58	10.5537	Lorentz
Peak 2	56.0654	1654.16	0.299992	20.5831	11.6573	Lorentz
PSMα4
Peak 1	69.1164	1625.85	0.409857	21.8865	14.7782	Lorentz
Peak 2	30.8836	1655.9	0.183138	20.9394	4.3791	Lorentz
PSMβ1
Peak 1	66.8201	1624.96	0.238183	27.9626	10.4619	Lorentz
Peak 2	33.1799	1656.75	0.118271	29.2297	5.43029	Lorentz
PSMβ2
Peak 1	66.2264	1624.34	0.224299	24.1999	8.52632	Lorentz
Peak 2	20.0511	1655.55	0.06791	88.4255	9.43253	Lorentz
Peak 3	13.7225	1663.97	0.046476	22.8142	1.38984	Lorentz
