# Supplementary material for: Cross-talk between individual phenol-soluble modulins in Staphylococcus aureus biofilm enables rapid and efficient amyloid formation
Source: eLife. 2020 Dec 1;9:e59776. doi: 10.7554/eLife.59776 (PMC7732344; doi:10.7554/eLife.59776)
Supplement: Figure 4—figure supplement 1—source data 1. [file elife-59776-fig4-figsupp1-data1.xlsx]

## Sheet: Fig. 4a
20 % PSMα1 preformed seeds
	Time (h)	PSMα2	PSMα2	PSMα2	PSMα3	PSMα3	PSMα3	PSMα4	PSMα4	PSMα4	PSMβ1	PSMβ1	PSMβ1	PSMβ2	PSMβ2	PSMβ2	δ-toxin	δ-toxin	δ-toxin
	0	541	648	712	340	654	745	1427	1853	1292	2278	1317	1299	2846	2039	1799	2073	1582	1887
	0.166667	757	888	902	695	1023	1009	899	1227	827	2187	1103	1253	2205	1501	1326	1697	1240	1503
	0.333333	849	940	938	925	1188	1164	764	1024	729	1732	1075	1234	1974	1286	1142	1545	1140	1395
	0.5	937	993	1004	2373	1727	1627	715	908	713	1659	1069	1239	1807	1190	1076	1485	1100	1348
	0.666667	1026	1055	1065	2803	2823	2693	722	878	740	1624	1077	1262	1710	1156	1055	1448	1105	1357
	0.833333	1104	1125	1121	2776	3015	2917	742	885	774	1628	1106	1285	1648	1159	1056	1466	1133	1382
	1	1187	1184	1171	2721	2979	2880	757	904	806	1645	1151	1323	1624	1170	1076	1499	1176	1436
	1.16667	1246	1229	1222	2704	2954	2901	789	940	831	1659	1206	1355	1596	1203	1099	1560	1237	1489
	1.33333	1311	1275	1273	2713	2935	3023	804	962	858	1685	1266	1393	1604	1230	1135	1613	1304	1567
	1.5	1363	1314	1306	2737	2936	3072	826	991	883	1710	1304	1425	1594	1272	1166	1661	1372	1653
	1.66667	1418	1348	1355	2754	2959	3162	837	1014	905	1720	1337	1447	1610	1302	1197	1718	1447	1736
	1.83333	1472	1393	1386	2766	3011	3187	849	1029	918	1739	1377	1477	1612	1341	1235	1769	1506	1837
	2	1516	1435	1435	2786	3037	3234	870	1051	935	1761	1403	1512	1630	1391	1268	1815	1581	1929
	2.16667	1556	1470	1461	2796	3062	3288	876	1065	942	1762	1424	1527	1655	1421	1302	1865	1649	1992
	2.33333	1581	1499	1486	2809	3063	3322	884	1073	958	1779	1455	1546	1670	1464	1331	1915	1735	2042
	2.5	1623	1529	1514	2829	3075	3410	894	1090	966	1778	1469	1560	1680	1498	1373	1963	1792	2094
	2.66667	1653	1551	1539	2855	3085	3476	903	1104	970	1793	1488	1582	1703	1534	1391	2006	1856	2124
	2.83333	1669	1569	1551	2868	3101	3551	915	1111	986	1785	1505	1585	1721	1551	1416	2042	1918	2160
	3	1698	1578	1569	2886	3128	3581	925	1124	991	1779	1515	1604	1737	1588	1455	2080	1970	2188
	3.16667	1710	1595	1581	2907	3139	3607	924	1131	995	1801	1522	1617	1760	1609	1489	2113	2026	2209
	3.33333	1724	1619	1587	2908	3192	3636	930	1146	1001	1799	1527	1633	1779	1641	1499	2153	2080	2234
	3.5	1737	1627	1610	2927	3180	3657	937	1145	1013	1803	1536	1627	1802	1657	1522	2182	2129	2235
	3.66667	1738	1632	1610	2932	3218	3647	936	1160	1012	1804	1550	1636	1813	1679	1550	2203	2170	2261
	3.83333	1751	1637	1608	2989	3227	3654	944	1167	1029	1799	1555	1647	1828	1695	1549	2226	2204	2284
	4	1747	1634	1625	2997	3240	3659	954	1171	1025	1807	1559	1642	1851	1713	1575	2262	2239	2296
	4.16667	1745	1639	1628	3023	3262	3645	960	1172	1025	1806	1555	1652	1857	1722	1588	2260	2270	2307
	4.33333	1738	1644	1625	3021	3252	3633	962	1188	1033	1813	1565	1655	1866	1738	1602	2288	2304	2323
	4.5	1728	1641	1636	3060	3247	3642	968	1188	1036	1813	1569	1660	1891	1753	1620	2306	2329	2337
	4.66667	1729	1639	1637	3066	3257	3632	978	1193	1039	1806	1566	1670	1903	1757	1628	2319	2335	2348
	4.83333	1723	1643	1638	3086	3245	3613	980	1193	1054	1809	1582	1664	1909	1771	1645	2337	2354	2355
	5	1730	1638	1642	3107	3225	3602	984	1203	1048	1814	1568	1663	1928	1780	1648	2356	2368	2362
	5.16667	1731	1645	1652	3102	3220	3585	978	1211	1053	1809	1577	1668	1932	1785	1658	2358	2401	2359
	5.33333	1743	1657	1642	3127	3232	3553	986	1215	1055	1806	1572	1675	1944	1791	1669	2374	2412	2389
	5.5	1741	1644	1650	3110	3242	3533	996	1219	1061	1815	1583	1671	1956	1793	1684	2380	2430	2398
	5.66667	1743	1640	1669	3114	3223	3522	992	1222	1062	1819	1582	1682	1959	1805	1681	2403	2444	2407
	5.83333	1735	1653	1663	3114	3245	3509	999	1230	1074	1817	1587	1683	1968	1812	1691	2408	2455	2421
	6	1745	1655	1653	3126	3219	3499	1002	1227	1072	1816	1583	1676	1978	1819	1700	2425	2478	2427
	6.16667	1747	1658	1663	3122	3208	3456	1004	1240	1072	1816	1578	1680	1979	1819	1698	2433	2488	2426
	6.33333	1756	1652	1664	3138	3211	3444	1009	1238	1074	1822	1579	1683	1979	1821	1705	2447	2503	2442
	6.5	1763	1672	1661	3132	3191	3433	1010	1242	1081	1819	1580	1690	1981	1824	1711	2456	2511	2443
	6.66667	1765	1662	1655	3114	3183	3422	1015	1246	1087	1820	1582	1690	1998	1828	1714	2461	2533	2450
	6.83333	1759	1666	1669	3124	3150	3412	1021	1252	1086	1821	1582	1687	1997	1828	1718	2478	2532	2465
	7	1762	1669	1665	3116	3165	3405	1019	1260	1091	1818	1586	1680	2016	1839	1723	2479	2544	2487
	7.16667	1762	1673	1682	3116	3153	3386	1026	1255	1098	1821	1589	1685	2012	1834	1729	2499	2564	2476
	7.33333	1762	1670	1679	3127	3128	3367	1032	1273	1101	1821	1590	1693	2006	1847	1735	2499	2571	2485
	7.5	1763	1672	1677	3107	3127	3347	1031	1266	1103	1825	1588	1689	2022	1851	1732	2518	2587	2504
	7.66667	1773	1676	1675	3113	3125	3342	1038	1266	1106	1829	1588	1696	2021	1852	1743	2520	2595	2512
	7.83333	1774	1677	1680	3101	3116	3326	1040	1275	1117	1826	1595	1691	2036	1849	1750	2541	2590	2519
	8	1781	1671	1682	3095	3114	3320	1043	1276	1113	1828	1589	1689	2028	1856	1750	2545	2610	2524
	8.16667	1789	1687	1676	3098	3100	3316	1046	1283	1122	1826	1587	1699	2031	1866	1751	2563	2633	2541
	8.33333	1780	1678	1663	3096	3090	3295	1053	1285	1125	1821	1590	1692	2039	1865	1759	2559	2635	2542
	8.5	1793	1688	1665	3081	3087	3302	1050	1296	1129	1830	1595	1706	2038	1866	1762	2571	2632	2544
	8.66667	1779	1701	1669	3069	3083	3289	1058	1297	1125	1825	1597	1702	2047	1858	1759	2578	2642	2562
	8.83333	1792	1686	1669	3081	3069	3275	1059	1299	1132	1831	1587	1688	2041	1873	1759	2586	2649	2561
	9	1807	1697	1672	3061	3071	3282	1060	1296	1128	1835	1600	1698	2042	1869	1767	2599	2654	2570
	9.16667	1802	1699	1674	3061	3071	3261	1065	1302	1141	1832	1593	1697	2042	1876	1756	2595	2673	2584
	9.33333	1800	1703	1670	3064	3051	3249	1070	1312	1146	1831	1599	1700	2056	1878	1772	2611	2676	2589
	9.5	1798	1703	1672	3049	3044	3248	1074	1304	1150	1835	1595	1698	2053	1866	1781	2615	2697	2587
	9.66667	1804	1697	1681	3057	3042	3249	1082	1307	1149	1833	1601	1702	2055	1888	1770	2607	2700	2612
	9.83333	1808	1701	1680	3040	3034	3239	1083	1308	1153	1836	1594	1690	2062	1881	1776	2626	2690	2598
	10	1819	1699	1677	3046	3028	3224	1078	1305	1153	1831	1599	1695	2055	1887	1785	2630	2723	2603
	10.1667	1817	1702	1682	3036	3029	3223	1091	1312	1160	1827	1599	1704	2063	1890	1779	2645	2706	2628
	10.3333	1816	1724	1680	3043	3032	3226	1085	1320	1148	1837	1606	1704	2064	1891	1789	2633	2702	2621
	10.5	1823	1722	1688	3043	3033	3220	1093	1315	1158	1838	1599	1710	2073	1887	1782	2644	2726	2629
	10.6667	1820	1723	1685	3028	3027	3219	1094	1326	1153	1837	1607	1708	2079	1899	1788	2661	2738	2638
	10.8333	1831	1728	1701	3021	3012	3217	1093	1327	1166	1835	1599	1703	2074	1900	1799	2660	2735	2635
	11	1835	1728	1693	3025	3018	3214	1097	1331	1170	1832	1604	1702	2075	1897	1794	2672	2738	2644
	11.1667	1832	1724	1694	3018	3011	3197	1106	1343	1166	1843	1598	1703	2084	1908	1792	2672	2736	2667
	11.3333	1835	1733	1708	3012	3004	3200	1104	1339	1171	1838	1605	1717	2087	1917	1790	2689	2754	2660
	11.5	1835	1732	1699	3009	2999	3194	1106	1342	1177	1848	1610	1710	2077	1910	1794	2675	2752	2669
	11.6667	1844	1737	1698	3008	3000	3195	1112	1340	1182	1842	1597	1708	2082	1916	1803	2678	2768	2677
	11.8333	1841	1739	1710	3006	2987	3181	1114	1346	1185	1836	1595	1705	2082	1909	1805	2702	2767	2675
	12	1849	1744	1711	2997	2991	3181	1115	1346	1185	1839	1602	1709	2083	1916	1797	2691	2784	2676
	12.1667	1846	1742	1711	2995	2991	3168	1125	1354	1193	1856	1602	1713	2086	1909	1812	2704	2785	2685
	12.3333	1847	1744	1718	3000	2981	3186	1133	1363	1186	1839	1606	1713	2086	1907	1806	2713	2786	2682
	12.5	1851	1757	1720	2989	2989	3178	1136	1360	1190	1838	1603	1714	2092	1920	1808	2714	2805	2701
	12.6667	1846	1746	1717	2978	2990	3168	1129	1359	1195	1845	1601	1716	2095	1923	1810	2714	2800	2688
	12.8333	1872	1755	1725	2979	2971	3158	1143	1374	1198	1839	1607	1711	2091	1919	1818	2720	2803	2707
	13	1869	1760	1729	2994	2983	3154	1141	1366	1206	1839	1607	1713	2106	1924	1817	2730	2800	2714
	13.1667	1868	1761	1740	2989	2968	3163	1140	1365	1204	1847	1599	1714	2098	1925	1819	2748	2797	2714
	13.3333	1878	1763	1745	2980	2975	3167	1142	1377	1202	1850	1606	1718	2102	1923	1818	2738	2814	2721
	13.5	1884	1768	1741	2969	2982	3162	1142	1371	1212	1842	1606	1719	2098	1931	1821	2755	2814	2734
	13.6667	1871	1770	1740	2964	2968	3157	1148	1382	1208	1842	1600	1719	2101	1930	1820	2741	2808	2726
	13.8333	1888	1773	1748	2960	2967	3166	1151	1387	1216	1846	1605	1710	2098	1933	1820	2754	2838	2723
	14	1886	1781	1754	2964	2976	3152	1147	1387	1214	1834	1614	1715	2109	1935	1824	2749	2828	2736
	14.1667	1884	1776	1750	2947	2961	3139	1154	1382	1222	1843	1612	1713	2102	1931	1822	2766	2840	2739
	14.3333	1892	1783	1754	2953	2954	3137	1155	1381	1228	1845	1602	1710	2098	1940	1826	2759	2831	2747
	14.5	1902	1789	1762	2940	2945	3136	1158	1381	1219	1844	1606	1713	2111	1938	1831	2776	2845	2738
	14.6667	1907	1783	1764	2934	2962	3139	1162	1393	1232	1845	1611	1717	2102	1942	1829	2785	2837	2748
	14.8333	1899	1784	1763	2946	2955	3138	1161	1387	1228	1840	1615	1716	2110	1933	1837	2782	2845	2758
	15	1904	1787	1755	2952	2957	3133	1162	1393	1227	1850	1607	1709	2108	1940	1838	2777	2851	2752
	15.1667	1909	1797	1766	2941	2947	3127	1169	1401	1241	1850	1610	1718	2104	1937	1826	2776	2843	2759
	15.3333	1920	1798	1766	2926	2955	3137	1172	1402	1239	1846	1611	1715	2115	1944	1836	2782	2843	2758
	15.5	1917	1809	1781	2931	2949	3143	1167	1408	1237	1849	1598	1710	2116	1947	1835	2798	2848	2771
	15.6667	1926	1805	1787	2941	2951	3124	1173	1408	1244	1848	1614	1712	2104	1948	1844	2810	2851	2778
	15.8333	1922	1817	1778	2928	2945	3129	1176	1413	1247	1845	1609	1713	2115	1959	1838	2811	2862	2776
	16	1936	1825	1787	2943	2942	3142	1180	1406	1246	1841	1610	1716	2119	1943	1838	2803	2858	2773
	16.1667	1940	1819	1794	2928	2945	3129	1179	1409	1250	1840	1603	1710	2111	1944	1835	2798	2862	2784
	16.3333	1937	1820	1794	2934	2941	3125	1188	1410	1252	1850	1602	1720	2115	1949	1844	2812	2864	2777
	16.5	1949	1822	1797	2923	2926	3122	1187	1419	1258	1841	1606	1719	2109	1957	1844	2800	2873	2773
	16.6667	1939	1825	1791	2919	2931	3136	1190	1416	1257	1846	1613	1713	2110	1953	1842	2824	2864	2794
	16.8333	1936	1834	1800	2914	2933	3112	1191	1420	1254	1840	1611	1704	2116	1949	1847	2819	2873	2794
	17	1962	1831	1808	2929	2926	3109	1193	1422	1264	1844	1607	1718	2113	1951	1844	2810	2883	2790
	17.1667	1957	1839	1811	2917	2939	3133	1196	1428	1265	1852	1598	1717	2116	1959	1852	2820	2876	2803
	17.3333	1960	1841	1817	2921	2929	3121	1189	1425	1266	1841	1608	1725	2119	1956	1856	2832	2875	2801
	17.5	1964	1840	1815	2922	2935	3123	1199	1421	1261	1845	1603	1711	2122	1966	1851	2835	2887	2803
	17.6667	1972	1839	1817	2911	2935	3120	1195	1432	1267	1852	1607	1719	2121	1961	1840	2842	2878	2801
	17.8333	1973	1851	1827	2910	2928	3107	1198	1428	1267	1846	1608	1718	2119	1959	1843	2838	2891	2797
	18	1979	1857	1827	2903	2922	3117	1202	1436	1282	1850	1601	1710	2121	1958	1858	2836	2891	2802
	18.1667	1983	1847	1833	2906	2923	3108	1207	1439	1276	1842	1610	1714	2129	1958	1846	2849	2898	2803
	18.3333	1983	1856	1832	2906	2922	3098	1204	1441	1290	1836	1605	1716	2118	1958	1844	2846	2890	2807
	18.5	1977	1860	1830	2902	2921	3100	1209	1440	1272	1845	1604	1717	2119	1959	1850	2843	2900	2811
	18.6667	1994	1871	1833	2907	2921	3103	1207	1447	1280	1843	1607	1715	2121	1963	1854	2861	2881	2819
	18.8333	1993	1867	1843	2896	2926	3111	1211	1441	1287	1846	1610	1723	2122	1961	1855	2852	2890	2827
	19	2001	1869	1848	2890	2929	3107	1214	1462	1283	1847	1603	1705	2118	1960	1846	2859	2903	2818
	19.1667	2000	1873	1837	2896	2916	3097	1215	1455	1287	1844	1609	1719	2125	1965	1860	2865	2906	2828
	19.3333	2008	1878	1842	2900	2916	3087	1225	1448	1292	1847	1607	1710	2125	1964	1862	2860	2909	2840
	19.5	2007	1875	1855	2883	2907	3093	1216	1452	1289	1851	1603	1713	2125	1964	1850	2869	2913	2824
	19.6667	2007	1876	1850	2896	2905	3089	1222	1462	1299	1837	1603	1713	2126	1968	1855	2864	2906	2835
	19.8333	2015	1892	1852	2899	2909	3106	1222	1453	1299	1837	1602	1710	2125	1964	1857	2857	2923	2822
	20	2015	1888	1860	2888	2906	3109	1216	1461	1301	1837	1607	1713	2128	1970	1851	2876	2920	2834
	20.1667	2024	1884	1870	2878	2897	3087	1224	1460	1300	1843	1609	1715	2136	1977	1861	2876	2925	2837
	20.3333	2027	1896	1873	2875	2898	3100	1225	1464	1304	1846	1601	1710	2117	1969	1869	2873	2923	2836
	20.5	2027	1903	1874	2892	2906	3092	1231	1478	1303	1844	1608	1718	2124	1971	1857	2876	2918	2850
	20.6667	2032	1903	1878	2887	2893	3091	1235	1467	1303	1844	1610	1723	2126	1979	1855	2871	2939	2849
	20.8333	2037	1917	1877	2889	2915	3090	1238	1477	1308	1843	1604	1717	2134	1977	1870	2876	2930	2856
	21	2045	1916	1882	2867	2903	3084	1237	1479	1309	1850	1604	1715	2132	1977	1860	2872	2929	2844
	21.1667	2043	1910	1895	2865	2912	3101	1235	1483	1304	1847	1602	1710	2132	1976	1864	2883	2930	2841
	21.3333	2056	1908	1882	2871	2910	3087	1239	1479	1314	1835	1607	1716	2120	1968	1865	2879	2918	2853
	21.5	2052	1911	1888	2876	2893	3086	1237	1477	1313	1844	1610	1711	2122	1965	1869	2889	2928	2861
	21.6667	2055	1925	1893	2886	2891	3101	1240	1478	1321	1854	1613	1714	2127	1977	1871	2886	2939	2860
	21.8333	2058	1929	1904	2877	2895	3090	1239	1485	1322	1843	1614	1719	2136	1977	1869	2887	2949	2856
	22	2061	1937	1910	2875	2901	3081	1243	1489	1318	1842	1614	1714	2135	1978	1867	2894	2936	2860
	22.1667	2063	1942	1897	2868	2900	3082	1243	1483	1327	1843	1610	1726	2128	1981	1872	2900	2938	2874
	22.3333	2072	1934	1905	2865	2901	3076	1251	1492	1332	1842	1598	1712	2127	1980	1865	2903	2954	2874
	22.5	2084	1940	1920	2864	2896	3091	1249	1492	1326	1847	1608	1719	2125	1992	1867	2891	2938	2871
	22.6667	2070	1949	1914	2868	2899	3084	1251	1497	1332	1848	1604	1717	2132	1980	1871	2896	2953	2868
	22.8333	2082	1940	1917	2869	2891	3082	1259	1494	1334	1842	1610	1712	2132	1968	1880	2896	2946	2880
	23	2089	1954	1925	2849	2897	3077	1259	1494	1329	1849	1602	1721	2137	1986	1871	2908	2941	2870
	23.1667	2094	1955	1928	2861	2898	3073	1255	1496	1335	1847	1605	1724	2128	1975	1865	2895	2951	2877
	23.3333	2097	1962	1927	2865	2895	3083	1260	1502	1331	1839	1610	1727	2131	1981	1866	2899	2948	2876
	23.5	2098	1959	1932	2875	2894	3069	1257	1515	1339	1850	1598	1722	2136	1979	1871	2897	2950	2874
	23.6667	2104	1955	1936	2861	2884	3076	1260	1511	1335	1848	1608	1725	2138	1984	1870	2909	2950	2891
	23.8333	2104	1968	1934	2848	2892	3073	1266	1506	1337	1848	1602	1726	2137	1989	1877	2902	2960	2879
	24	2112	1966	1929	2868	2882	3071	1268	1510	1348	1847	1604	1719	2134	1987	1878	2916	2958	2885
	24.1667	2097	1979	1943	2862	2881	3072	1267	1511	1339	1844	1612	1727	2143	1985	1874	2913	2970	2888
	24.3333	2102	1972	1953	2853	2894	3068	1264	1517	1342	1849	1609	1721	2142	1991	1874	2923	2967	2898
	24.5	2119	1976	1956	2866	2899	3074	1272	1514	1341	1838	1603	1718	2143	1987	1874	2918	2959	2891
	24.6667	2112	1977	1956	2856	2878	3068	1277	1527	1346	1838	1606	1718	2146	1984	1871	2906	2971	2892
	24.8333	2118	1983	1958	2845	2894	3069	1273	1522	1346	1847	1608	1724	2138	1986	1884	2904	2964	2899
	25	2117	1986	1973	2859	2894	3051	1265	1519	1356	1845	1608	1720	2134	1988	1883	2910	2974	2900
	25.1667	2127	1999	1963	2853	2891	3064	1270	1522	1354	1844	1610	1729	2136	1994	1886	2913	2955	2903
	25.3333	2135	1991	1972	2857	2891	3064	1277	1520	1361	1845	1595	1721	2141	1988	1882	2925	2971	2902
	25.5	2138	1996	1977	2842	2890	3069	1282	1527	1354	1848	1612	1730	2131	1988	1882	2924	2959	2892
	25.6667	2148	2005	1982	2847	2889	3055	1277	1523	1356	1853	1609	1724	2139	1987	1880	2911	2971	2910
	25.8333	2157	2009	1986	2861	2902	3083	1278	1531	1360	1843	1607	1724	2140	1995	1879	2922	2971	2917
	26	2153	2006	1982	2841	2891	3071	1285	1531	1361	1853	1604	1722	2140	1997	1878	2920	2981	2909
	26.1667	2155	2014	1997	2857	2875	3060	1282	1526	1364	1845	1605	1727	2134	1997	1878	2918	2978	2910
	26.3333	2158	2015	1998	2842	2887	3058	1283	1531	1361	1855	1609	1725	2136	1990	1883	2922	2984	2915
	26.5	2164	2023	1999	2857	2881	3064	1288	1537	1360	1854	1604	1729	2142	1996	1884	2926	2979	2913
	26.6667	2168	2021	1999	2847	2881	3069	1291	1546	1370	1850	1613	1729	2144	1992	1887	2918	2976	2914
	26.8333	2161	2039	2002	2842	2888	3060	1294	1542	1369	1851	1611	1735	2146	2000	1887	2924	2974	2918
	27	2175	2034	2005	2849	2874	3067	1292	1539	1367	1856	1613	1733	2142	1998	1891	2927	2988	2916
	27.1667	2181	2041	2010	2851	2893	3055	1293	1544	1375	1852	1619	1717	2143	1997	1882	2928	2975	2922
	27.3333	2185	2033	2015	2855	2888	3065	1292	1547	1371	1846	1611	1726	2142	2003	1887	2922	2996	2921
	27.5	2194	2040	2016	2839	2890	3062	1296	1549	1368	1845	1613	1731	2155	1997	1888	2931	2990	2929
	27.6667	2183	2045	2019	2841	2873	3059	1298	1549	1383	1845	1613	1726	2140	1996	1889	2934	3002	2920
	27.8333	2201	2052	2017	2834	2876	3067	1295	1551	1376	1847	1611	1727	2136	1996	1885	2928	2985	2937
	28	2195	2053	2030	2834	2875	3052	1301	1552	1379	1856	1614	1728	2142	1998	1884	2941	2991	2932
	28.1667	2204	2060	2022	2837	2877	3063	1300	1546	1380	1848	1613	1740	2139	2002	1886	2936	2997	2928
	28.3333	2206	2056	2046	2850	2890	3047	1301	1553	1376	1852	1605	1735	2140	1997	1900	2939	2991	2936
	28.5	2208	2065	2039	2846	2868	3064	1304	1554	1377	1854	1606	1733	2153	2011	1879	2932	2988	2936
	28.6667	2198	2065	2049	2834	2885	3053	1304	1557	1387	1851	1617	1728	2137	1997	1894	2929	2981	2942
	28.8333	2214	2073	2043	2836	2875	3058	1308	1552	1376	1854	1619	1741	2141	2005	1882	2929	3001	2938
	29	2218	2079	2037	2832	2887	3058	1310	1560	1375	1856	1623	1733	2135	1992	1890	2941	3008	2938
	29.1667	2224	2076	2055	2834	2883	3053	1312	1557	1391	1860	1613	1733	2137	1999	1898	2939	2992	2940
	29.3333	2228	2075	2062	2838	2881	3059	1308	1563	1396	1854	1621	1740	2141	2004	1888	2938	2998	2932
	29.5	2229	2084	2057	2839	2871	3046	1306	1573	1390	1850	1612	1738	2137	2008	1889	2932	2992	2949
	29.6667	2226	2080	2060	2848	2868	3058	1312	1565	1395	1852	1613	1742	2149	2001	1879	2918	3005	2952
	29.8333	2238	2088	2059	2836	2887	3057	1313	1570	1394	1857	1612	1740	2137	1999	1890	2939	3014	2948
	30	2237	2084	2059	2843	2874	3055	1316	1573	1399	1853	1622	1724	2145	2014	1891	2933	2998	2958
	30.1667	2244	2099	2075	2827	2881	3032	1314	1566	1392	1855	1617	1745	2153	2008	1894	2940	3005	2942
	30.3333	2252	2106	2080	2837	2877	3050	1320	1571	1403	1856	1608	1743	2144	2014	1894	2939	3004	2953
	30.5	2253	2101	2076	2833	2875	3060	1317	1567	1392	1862	1617	1736	2142	2001	1898	2954	3009	2954
	30.6667	2241	2110	2086	2830	2872	3046	1317	1578	1402	1865	1617	1743	2144	2017	1897	2942	3000	2962
	30.8333	2255	2107	2083	2830	2871	3061	1327	1578	1410	1862	1623	1744	2138	2007	1893	2948	3013	2945
	31	2267	2112	2094	2830	2874	3054	1318	1573	1403	1856	1623	1745	2142	2011	1899	2941	3012	2962
	31.1667	2271	2107	2092	2834	2874	3053	1311	1585	1412	1867	1619	1744	2146	2006	1900	2938	3005	2959
	31.3333	2268	2118	2089	2829	2866	3056	1324	1580	1410	1863	1621	1734	2146	2004	1894	2936	3015	2952
	31.5	2278	2118	2094	2831	2867	3041	1326	1580	1411	1865	1621	1745	2140	2007	1896	2943	3013	2960
	31.6667	2265	2129	2093	2833	2879	3043	1322	1580	1412	1859	1629	1745	2161	1998	1902	2940	3016	2966
	31.8333	2283	2120	2101	2819	2865	3049	1326	1587	1413	1860	1622	1742	2146	2009	1904	2958	3021	2973
	32	2288	2133	2101	2822	2868	3052	1333	1584	1414	1873	1629	1743	2144	2013	1896	2958	3021	2970
	32.1667	2278	2127	2108	2829	2868	3048	1324	1590	1414	1866	1625	1754	2140	2010	1906	2951	3015	2975
	32.3333	2284	2143	2111	2830	2871	3036	1333	1588	1420	1867	1627	1751	2142	2014	1899	2949	3022	2973
	32.5	2300	2140	2125	2825	2858	3036	1326	1590	1423	1868	1621	1755	2150	2011	1899	2948	3015	2976
	32.6667	2296	2140	2123	2827	2858	3040	1328	1592	1416	1862	1625	1757	2143	2026	1907	2959	3014	2980
	32.8333	2306	2146	2116	2828	2859	3035	1338	1594	1423	1868	1634	1754	2142	2022	1909	2948	3035	2977
	33	2310	2152	2133	2819	2864	3043	1338	1595	1421	1865	1631	1746	2154	2017	1902	2967	3022	2989
	33.1667	2304	2154	2128	2810	2855	3043	1338	1603	1416	1869	1624	1757	2142	2006	1900	2969	3026	2982
	33.3333	2317	2150	2130	2834	2866	3024	1339	1600	1424	1869	1628	1761	2150	2024	1902	2941	3016	2992
	33.5	2316	2164	2138	2817	2859	3044	1336	1604	1427	1874	1636	1755	2134	2016	1894	2961	3017	2987
	33.6667	2316	2167	2134	2814	2868	3048	1341	1608	1428	1879	1629	1761	2150	2011	1912	2966	3036	2991
	33.8333	2326	2167	2153	2820	2878	3036	1341	1604	1428	1873	1632	1757	2151	2018	1904	2961	3043	2990
	34	2328	2159	2146	2819	2854	3036	1335	1608	1428	1870	1631	1758	2146	2016	1904	2966	3032	2988
	34.1667	2328	2170	2152	2808	2859	3026	1348	1607	1434	1881	1629	1758	2156	2021	1902	2958	3022	3001
	34.3333	2329	2182	2156	2813	2848	3030	1338	1607	1436	1875	1627	1759	2145	2017	1900	2954	3030	3005
	34.5	2336	2185	2146	2817	2859	3025	1347	1622	1436	1878	1629	1762	2151	2014	1907	2964	3032	3011
	34.6667	2335	2179	2167	2825	2854	3035	1347	1619	1433	1878	1636	1762	2148	2033	1901	2957	3029	3007
	34.8333	2341	2176	2155	2820	2863	3032	1347	1615	1433	1877	1623	1767	2140	2013	1899	2958	3025	2993
	35	2346	2182	2156	2812	2851	3029	1356	1618	1443	1878	1638	1767	2143	2019	1911	2960	3023	3012
	35.1667	2343	2196	2172	2797	2859	3040	1351	1615	1438	1870	1638	1766	2155	2023	1903	2953	3039	2990
	35.3333	2355	2202	2167	2806	2866	3030	1351	1622	1441	1884	1633	1771	2149	2028	1906	2965	3027	3008
	35.5	2352	2195	2179	2809	2859	3027	1340	1627	1437	1876	1641	1761	2151	2031	1909	2968	3043	3002
	35.6667	2361	2203	2182	2817	2854	3036	1348	1619	1437	1879	1634	1774	2149	2024	1905	2960	3031	3004
	35.8333	2368	2208	2187	2808	2865	3036	1364	1628	1449	1884	1642	1775	2139	2026	1908	2962	3030	3011
	36	2362	2205	2183	2803	2848	3011	1354	1622	1447	1887	1641	1780	2153	2019	1903	2963	3037	3012
	36.1667	2375	2217	2185	2803	2859	3020	1362	1620	1445	1895	1642	1781	2151	2030	1899	2962	3042	3014
	36.3333	2374	2219	2192	2805	2849	3034	1363	1629	1447	1890	1641	1782	2151	2024	1910	2971	3041	3007
	36.5	2366	2208	2198	2801	2858	3010	1354	1620	1447	1886	1633	1779	2154	2028	1912	2980	3043	3019
	36.6667	2374	2226	2194	2806	2851	3013	1353	1636	1454	1882	1646	1785	2156	2020	1912	2965	3040	3007
	36.8333	2378	2229	2200	2804	2854	3016	1364	1629	1454	1892	1634	1781	2156	2023	1914	2968	3045	3031
	37	2378	2226	2206	2802	2856	3021	1363	1637	1462	1886	1645	1778	2149	2021	1907	2952	3030	3019
	37.1667	2391	2235	2203	2797	2859	3023	1365	1636	1461	1885	1645	1776	2152	2028	1907	2964	3042	3020
	37.3333	2392	2235	2210	2799	2859	3018	1375	1635	1463	1883	1647	1781	2156	2032	1917	2975	3039	3018
	37.5	2398	2233	2211	2806	2857	3026	1372	1647	1461	1893	1657	1784	2150	2023	1911	2974	3047	3015
	37.6667	2395	2249	2207	2801	2839	3024	1370	1644	1461	1885	1648	1783	2151	2025	1917	2971	3045	3019
	37.8333	2399	2244	2223	2808	2850	3028	1368	1642	1463	1888	1646	1781	2147	2028	1914	2972	3053	3020
	38	2403	2247	2230	2795	2852	3013	1367	1646	1466	1888	1647	1780	2144	2036	1911	2982	3048	3032
	38.1667	2419	2259	2232	2799	2856	3022	1370	1649	1475	1901	1651	1787	2142	2030	1908	2969	3040	3028
	38.3333	2411	2257	2223	2804	2858	3023	1373	1640	1476	1899	1651	1788	2154	2032	1917	2966	3049	3031
	38.5	2414	2250	2232	2806	2843	3022	1372	1651	1466	1879	1640	1778	2157	2038	1912	2968	3046	3026
	38.6667	2412	2251	2232	2789	2852	3005	1362	1636	1456	1872	1628	1770	2147	2018	1910	2934	3036	3008
	38.8333	2414	2252	2232	2796	2853	3007	1364	1625	1456	1872	1633	1769	2138	2022	1912	2945	3025	3008
	39	2415	2265	2228	2789	2840	3004	1354	1613	1442	1887	1636	1775	2131	2025	1896	2940	3033	3011
	39.1667	2412	2257	2235	2775	2831	3007	1350	1628	1440	1876	1627	1777	2132	2021	1901	2939	3019	3013
	39.3333	2429	2257	2241	2782	2832	3004	1349	1624	1451	1880	1628	1773	2130	2014	1899	2950	3024	3003
	39.5	2424	2269	2239	2791	2827	2999	1365	1617	1451	1874	1635	1770	2143	2024	1904	2941	3035	3019
	39.6667	2421	2270	2247	2773	2836	2995	1355	1618	1449	1880	1636	1770	2136	2014	1903	2947	3027	3014
	39.8333	2425	2272	2253	2782	2829	2989	1359	1633	1458	1876	1636	1777	2137	2019	1903	2942	3023	3020
	40	2436	2280	2255	2789	2840	2987	1364	1626	1455	1889	1632	1787	2145	2014	1901	2950	3041	3021
	40.1667	2445	2284	2262	2781	2833	3000	1365	1625	1443	1883	1632	1785	2141	2031	1905	2941	3032	3028
	40.3333	2436	2290	2267	2776	2832	2999	1360	1628	1455	1890	1641	1773	2136	2025	1906	2953	3024	3019
	40.5	2443	2287	2261	2768	2834	2996	1360	1625	1453	1886	1637	1782	2137	2033	1908	2951	3035	3024
	40.6667	2443	2276	2268	2771	2833	2996	1366	1632	1448	1893	1631	1779	2129	2021	1913	2941	3036	3025
	40.8333	2453	2293	2275	2783	2824	2988	1370	1628	1449	1887	1643	1793	2140	2032	1907	2949	3043	3037
	41	2459	2298	2269	2766	2826	2983	1363	1634	1455	1889	1645	1785	2136	2032	1902	2957	3036	3036
	41.1667	2459	2304	2279	2770	2820	2986	1370	1631	1455	1893	1638	1792	2138	2023	1915	2955	3041	3046
	41.3333	2463	2301	2280	2770	2824	2981	1367	1632	1461	1896	1648	1780	2137	2030	1909	2947	3047	3036
	41.5	2466	2299	2271	2770	2828	2978	1369	1635	1455	1898	1637	1792	2136	2018	1910	2953	3042	3027
	41.6667	2470	2314	2273	2775	2816	2983	1369	1639	1460	1887	1650	1798	2141	2035	1911	2953	3041	3048
	41.8333	2475	2311	2293	2767	2823	2986	1369	1641	1467	1897	1650	1790	2138	2024	1902	2950	3043	3031
	42	2484	2313	2292	2762	2831	2991	1374	1639	1465	1900	1658	1791	2141	2034	1907	2943	3039	3040
	42.1667	2489	2318	2297	2768	2828	2982	1371	1643	1472	1906	1649	1798	2131	2032	1909	2938	3056	3034
	42.3333	2481	2334	2307	2762	2827	2971	1373	1653	1471	1912	1651	1792	2131	2026	1899	2954	3036	3037
	42.5	2490	2321	2303	2769	2815	2985	1379	1649	1469	1899	1656	1806	2134	2035	1905	2951	3037	3038
	42.6667	2487	2335	2307	2763	2830	2983	1373	1654	1471	1906	1654	1792	2145	2030	1920	2953	3046	3036
	42.8333	2497	2329	2315	2776	2824	2991	1372	1652	1466	1898	1660	1798	2143	2032	1912	2944	3052	3042
	43	2500	2339	2316	2772	2834	2984	1377	1656	1468	1905	1656	1803	2143	2034	1910	2952	3047	3045
	43.1667	2498	2335	2309	2779	2821	2971	1384	1654	1479	1907	1657	1799	2147	2033	1912	2945	3033	3042
	43.3333	2503	2340	2320	2773	2821	2974	1381	1656	1479	1908	1648	1797	2141	2035	1912	2951	3041	3059
	43.5	2516	2353	2325	2768	2829	2975	1395	1653	1482	1909	1653	1805	2145	2033	1909	2942	3046	3046
	43.6667	2508	2354	2340	2772	2819	2980	1385	1652	1479	1905	1661	1807	2137	2038	1920	2948	3049	3046
	43.8333	2523	2350	2337	2779	2818	2971	1384	1653	1473	1913	1653	1802	2143	2031	1922	2946	3053	3063
	44	2520	2374	2329	2763	2815	2976	1395	1660	1480	1912	1655	1810	2140	2040	1911	2951	3054	3059

## Sheet: Fig. 4b
20 % PSMα3 preformed seeds
	Time (h)	PSMα1	PSMα1	PSMα1	PSMα2	PSMα2	PSMα2	PSMα4	PSMα4	PSMα4	PSMβ1	PSMβ1	PSMβ1	PSMβ2	PSMβ2	PSMβ2	δ-toxin	δ-toxin	δ-toxin
	0	186	176	185	186	198	232	377	306	396	562	585	569	402	400	431	202	203	211
	0.166667	174	159	176	175	192	223	306	254	319	400	411	392	308	330	467	188	182	200
	0.333333	170	159	183	178	193	218	293	251	305	380	383	364	276	298	353	189	182	202
	0.5	172	152	177	175	193	218	293	264	300	382	380	368	279	297	335	203	191	212
	0.666667	169	149	172	182	197	222	297	269	298	396	398	379	288	298	341	215	201	216
	0.833333	165	146	173	182	197	226	298	274	299	412	413	396	300	315	351	221	210	228
	1	166	146	172	189	200	229	304	281	298	428	430	414	313	331	360	234	217	239
	1.16667	168	147	169	194	201	235	304	289	297	447	456	427	324	336	367	240	228	245
	1.33333	170	146	176	198	206	238	312	298	303	466	473	458	332	348	380	249	236	252
	1.5	171	147	174	204	211	244	317	303	305	488	486	476	341	357	389	257	240	255
	1.66667	170	147	176	208	219	256	321	302	308	506	513	494	355	365	396	265	244	265
	1.83333	172	150	171	211	224	259	322	314	299	519	527	510	358	368	404	265	254	266
	2	174	148	178	213	233	262	323	310	314	531	535	524	365	379	413	272	257	268
	2.16667	175	148	173	221	242	268	331	314	313	547	552	536	372	381	413	272	258	275
	2.33333	178	152	175	221	249	276	327	321	313	553	564	541	379	387	416	267	262	275
	2.5	173	145	183	227	247	276	330	319	314	563	568	550	377	388	426	271	265	279
	2.66667	178	147	179	232	251	277	337	324	317	574	577	557	385	392	425	271	267	280
	2.83333	179	156	180	239	259	280	341	326	321	583	582	564	393	397	430	268	265	281
	3	181	155	182	238	260	283	344	328	323	593	595	576	396	400	436	274	270	282
	3.16667	179	158	183	244	262	288	339	332	323	598	598	579	396	406	439	272	270	285
	3.33333	182	156	185	242	261	286	343	333	322	607	597	582	395	401	436	274	269	281
	3.5	183	160	188	247	266	287	345	335	328	614	611	584	398	409	443	274	271	279
	3.66667	191	163	190	249	270	288	347	338	323	613	607	592	402	408	442	274	272	279
	3.83333	195	162	190	251	266	291	352	341	329	620	619	597	402	408	444	269	273	276
	4	196	166	193	251	270	294	351	347	331	624	619	599	400	404	453	272	271	278
	4.16667	205	172	197	252	266	291	358	348	331	622	621	607	403	401	449	272	271	281
	4.33333	213	174	204	251	267	290	352	345	332	624	628	608	403	396	447	272	271	282
	4.5	216	175	210	255	265	297	359	347	332	633	629	609	400	390	454	272	271	277
	4.66667	232	181	217	255	266	295	359	351	338	639	635	617	405	389	457	271	271	277
	4.83333	246	188	227	254	272	298	365	353	337	639	632	616	397	389	452	269	267	283
	5	270	193	231	256	271	293	366	356	339	642	637	625	400	384	459	271	268	281
	5.16667	288	199	248	259	266	298	367	357	342	648	637	624	395	387	460	272	273	283
	5.33333	309	205	264	254	265	298	370	358	339	650	640	620	385	381	455	267	269	279
	5.5	334	214	280	257	268	303	371	357	339	652	644	632	385	388	460	272	269	279
	5.66667	372	229	300	254	270	297	370	363	340	657	651	632	388	386	465	269	267	277
	5.83333	412	243	326	260	267	299	375	364	342	658	651	634	387	388	459	269	271	281
	6	457	263	359	262	267	298	369	367	342	658	655	638	386	387	461	273	270	280
	6.16667	508	286	390	258	265	298	378	369	347	669	663	634	387	391	455	269	267	280
	6.33333	575	310	445	262	264	300	377	365	345	667	658	643	387	387	462	269	270	279
	6.5	650	346	497	263	270	300	380	369	348	669	660	643	385	386	462	270	269	277
	6.66667	741	376	561	260	267	299	381	370	347	668	667	642	394	390	459	269	271	277
	6.83333	816	415	627	261	267	302	383	369	352	672	665	649	397	393	459	276	272	278
	7	921	466	714	256	267	298	383	372	348	681	670	652	395	389	463	266	265	277
	7.16667	1037	512	798	261	265	298	387	373	352	672	669	652	399	389	455	270	271	278
	7.33333	1153	566	892	257	271	300	386	376	351	679	670	653	399	394	460	267	269	278
	7.5	1274	614	1002	257	270	302	389	377	354	684	676	658	407	398	456	270	267	277
	7.66667	1402	676	1114	259	266	301	385	381	355	681	677	657	411	401	458	269	264	278
	7.83333	1538	736	1240	261	264	302	388	382	355	690	679	662	414	406	454	271	265	277
	8	1670	802	1359	260	268	300	392	385	355	686	683	661	415	410	464	267	268	275
	8.16667	1806	867	1498	263	266	301	392	387	356	689	684	668	418	411	456	269	270	277
	8.33333	1956	935	1633	259	264	300	393	389	363	691	685	667	429	414	465	269	265	277
	8.5	2094	999	1779	259	267	300	395	389	360	698	685	672	432	425	465	267	264	277
	8.66667	2246	1077	1931	264	269	304	397	388	358	696	698	672	438	430	469	272	264	277
	8.83333	2379	1149	2079	258	263	301	394	390	359	701	691	673	446	432	470	268	266	273
	9	2539	1234	2248	261	267	300	397	390	362	699	691	676	455	447	481	263	263	276
	9.16667	2690	1303	2410	259	265	301	401	391	366	702	696	671	465	458	489	269	270	273
	9.33333	2855	1384	2563	259	267	302	403	392	365	698	696	687	480	458	494	264	264	280
	9.5	3007	1467	2751	261	264	300	405	395	369	705	703	683	490	473	500	267	267	277
	9.66667	3174	1568	2915	258	265	297	404	401	369	710	704	683	506	484	501	268	267	274
	9.83333	3335	1661	3088	262	266	303	410	397	368	714	703	684	534	495	510	268	266	276
	10	3502	1745	3271	261	266	300	408	402	367	709	710	685	557	509	517	270	263	277
	10.1667	3689	1841	3454	264	266	300	412	402	368	710	708	686	595	518	532	267	258	272
	10.3333	3852	1940	3637	261	268	299	410	404	371	713	714	688	623	537	536	266	269	274
	10.5	3997	2044	3826	261	265	300	418	406	371	716	714	692	664	554	550	262	266	276
	10.6667	4212	2152	4022	267	268	303	413	406	373	712	718	693	721	584	554	261	265	272
	10.8333	4384	2249	4209	259	265	301	416	408	371	717	715	690	766	615	571	266	267	273
	11	4542	2371	4407	257	268	299	419	409	380	726	712	701	812	660	577	266	265	272
	11.1667	4743	2481	4612	261	263	297	418	415	377	722	720	701	856	700	597	264	263	273
	11.3333	4923	2599	4794	258	264	295	420	412	379	721	722	699	898	735	618	267	263	277
	11.5	5111	2732	4986	256	265	298	421	413	377	718	721	696	951	781	633	262	261	272
	11.6667	5304	2853	5210	257	264	299	419	419	376	720	726	695	980	834	659	260	263	270
	11.8333	5502	2966	5412	265	265	295	421	414	377	729	723	702	1020	883	680	265	262	272
	12	5676	3106	5644	262	268	297	416	413	383	732	724	701	1053	939	715	263	263	277
	12.1667	5878	3248	5841	260	262	296	424	420	380	730	730	700	1071	992	751	265	265	271
	12.3333	6095	3380	6096	258	267	302	424	416	382	731	736	707	1106	1036	782	264	262	274
	12.5	6336	3515	6315	263	269	301	424	420	385	734	738	705	1125	1086	809	262	261	270
	12.6667	6503	3641	6573	263	267	299	430	421	381	735	742	700	1150	1140	849	265	262	271
	12.8333	6728	3793	6823	264	265	297	427	421	383	730	741	703	1179	1183	888	263	260	269
	13	6925	3925	7076	262	266	298	425	426	380	733	736	715	1213	1220	922	262	261	266
	13.1667	7177	4072	7370	262	268	300	434	425	386	737	738	708	1233	1256	962	263	259	267
	13.3333	7406	4218	7684	266	261	300	433	425	387	742	739	711	1260	1286	1004	258	262	274
	13.5	7650	4368	7968	259	272	295	430	427	384	742	735	705	1289	1315	1047	258	260	268
	13.6667	7858	4519	8317	258	264	296	429	425	389	739	737	711	1302	1352	1076	259	259	266
	13.8333	8153	4683	8629	259	267	294	432	423	389	745	745	719	1325	1390	1123	261	258	269
	14	8424	4858	8962	260	263	297	431	426	390	741	751	720	1350	1415	1161	261	265	269
	14.1667	8677	5016	9293	255	267	297	435	426	392	740	747	725	1370	1445	1213	260	261	269
	14.3333	8934	5173	9751	263	267	295	438	433	389	748	749	722	1383	1472	1257	261	261	269
	14.5	9284	5337	10157	256	267	296	438	433	393	747	751	717	1407	1496	1275	263	259	271
	14.6667	9560	5523	10646	259	265	297	434	435	395	746	749	721	1421	1527	1328	262	260	271
	14.8333	9885	5708	11081	263	265	296	440	440	391	747	755	726	1461	1546	1364	264	259	269
	15	10210	5863	11547	261	263	302	438	432	390	750	755	728	1464	1571	1413	262	260	265
	15.1667	10594	6068	12136	262	262	296	438	433	395	756	761	724	1488	1606	1455	256	255	268
	15.3333	10916	6267	12645	259	261	294	441	437	397	753	753	720	1504	1633	1495	258	258	271
	15.5	11326	6451	13162	260	264	295	442	440	392	759	754	725	1520	1664	1526	261	258	265
	15.6667	11709	6646	13722	259	264	297	442	437	397	759	758	726	1540	1690	1562	258	253	265
	15.8333	12121	6843	14304	256	263	292	447	441	394	757	761	722	1555	1730	1611	256	259	267
	16	12547	7032	14844	261	263	295	443	441	399	759	761	729	1574	1763	1644	259	261	267
	16.1667	12951	7281	15428	257	265	295	443	441	400	755	761	733	1601	1799	1679	256	252	266
	16.3333	13440	7471	16078	257	262	295	443	446	400	755	771	735	1631	1829	1721	257	259	267
	16.5	13912	7682	16759	258	263	295	447	443	406	760	763	728	1649	1866	1753	257	255	265
	16.6667	14336	7854	17325	262	260	297	449	445	404	768	770	727	1658	1895	1789	260	258	269
	16.8333	14821	8117	17920	257	264	291	447	449	404	759	764	738	1692	1929	1808	256	258	268
	17	15303	8298	18608	262	260	290	450	448	398	764	770	737	1696	1952	1849	255	261	270
	17.1667	15799	8519	19195	265	262	299	452	447	403	763	774	731	1714	1988	1872	258	257	264
	17.3333	16332	8756	19831	261	260	293	449	448	404	768	774	736	1721	2030	1901	261	255	268
	17.5	16866	8994	20377	262	264	293	457	447	405	770	777	740	1736	2049	1916	260	255	265
	17.6667	17352	9241	20884	260	261	292	451	448	405	773	776	742	1734	2089	1944	262	254	267
	17.8333	17850	9482	21482	259	266	292	453	451	402	770	773	739	1751	2118	1967	260	255	267
	18	18277	9714	21909	255	262	296	450	451	406	772	775	739	1765	2153	1988	261	252	267
	18.1667	18740	9961	22440	262	265	294	455	455	405	776	783	738	1777	2186	2009	259	254	263
	18.3333	19218	10257	22881	262	264	291	459	453	409	775	782	743	1798	2202	2025	255	254	266
	18.5	19622	10521	23339	256	265	294	453	456	407	777	776	742	1808	2226	2042	258	257	266
	18.6667	20111	10763	23800	258	259	296	456	453	408	779	783	740	1818	2246	2072	256	255	261
	18.8333	20550	11090	24264	257	262	293	459	456	416	776	784	744	1833	2273	2083	254	254	263
	19	21008	11418	24741	259	260	293	460	460	413	785	789	750	1843	2299	2103	256	256	266
	19.1667	21379	11722	25078	258	261	295	459	462	412	777	787	746	1846	2318	2105	255	257	262
	19.3333	21881	12073	25415	256	260	292	467	457	412	777	784	750	1876	2352	2125	254	254	265
	19.5	22208	12402	25834	259	262	289	463	462	414	779	790	743	1873	2373	2144	253	257	265
	19.6667	22589	12675	26125	255	257	293	464	457	410	783	793	747	1879	2396	2151	255	255	263
	19.8333	22943	12990	26439	258	263	295	457	461	415	784	789	744	1897	2410	2170	256	254	263
	20	23305	13343	26835	263	259	289	459	462	415	784	791	748	1903	2428	2177	251	257	263
	20.1667	23722	13643	27062	253	264	294	467	462	413	799	791	758	1909	2441	2197	258	252	267
	20.3333	24072	13974	27348	258	262	292	460	462	412	793	796	754	1921	2471	2212	254	248	261
	20.5	24388	14245	27590	261	260	292	467	463	415	797	799	758	1932	2490	2219	256	254	262
	20.6667	24792	14611	27842	260	259	290	463	464	418	799	802	759	1949	2496	2241	254	250	265
	20.8333	25130	14945	28143	257	261	292	465	462	415	797	801	752	1960	2518	2245	252	258	262
	21	25501	15250	28333	261	261	289	469	466	424	801	793	758	1964	2536	2261	255	253	266
	21.1667	25777	15633	28663	256	260	291	471	468	420	801	805	754	1982	2543	2272	260	248	259
	21.3333	26159	15911	28841	261	260	288	467	466	422	805	802	757	1982	2564	2284	247	252	260
	21.5	26451	16296	28983	256	255	292	470	467	425	801	802	751	1991	2580	2282	252	249	264
	21.6667	26770	16592	29188	258	263	289	472	472	418	804	802	757	1996	2597	2301	253	254	267
	21.8333	27107	16922	29367	258	260	293	467	467	425	805	811	758	2011	2613	2310	252	250	264
	22	27289	17309	29503	258	259	289	469	469	417	800	808	759	2017	2629	2309	253	251	259
	22.1667	27693	17646	29582	257	259	288	471	476	422	805	807	759	2031	2662	2324	250	254	260
	22.3333	27944	18003	29630	257	259	289	474	475	422	809	802	758	2028	2669	2344	255	252	257
	22.5	28186	18371	29727	255	254	291	475	476	423	808	812	764	2046	2690	2356	251	254	265
	22.6667	28469	18721	29752	259	261	290	472	473	422	809	810	767	2045	2698	2372	254	250	265
	22.8333	28763	19164	29846	254	259	288	470	472	425	811	806	758	2054	2717	2372	255	253	258
	23	28882	19439	29908	256	259	287	475	475	425	811	808	764	2067	2734	2386	250	250	258
	23.1667	29159	19858	29885	256	260	292	473	477	426	814	817	766	2065	2742	2386	253	248	257
	23.3333	29359	20183	29961	254	258	290	478	476	423	818	811	768	2084	2767	2399	252	254	260
	23.5	29578	20543	29929	255	257	291	479	475	425	814	819	764	2084	2777	2409	250	252	263
	23.6667	29754	20992	29922	259	261	290	480	480	432	814	817	767	2084	2787	2424	248	247	259
	23.8333	29986	21440	29901	256	264	289	482	481	435	822	819	766	2095	2798	2436	253	253	257
	24	30140	21724	29837	251	261	288	483	480	432	824	817	763	2092	2808	2424	256	244	261
	24.1667	30175	22201	29787	258	260	290	483	480	428	822	818	768	2111	2817	2437	253	252	261
	24.3333	30442	22588	29816	252	259	288	479	477	432	822	821	773	2108	2835	2447	248	248	260
	24.5	30557	23030	29763	262	262	288	483	480	431	830	817	765	2105	2835	2460	249	246	265
	24.6667	30667	23411	29727	254	260	290	481	480	438	822	822	763	2122	2858	2478	254	249	258
	24.8333	30812	23728	29625	253	260	289	483	486	436	828	824	774	2109	2865	2472	254	249	261
	25	30865	24161	29629	253	260	285	485	485	436	834	822	765	2121	2864	2490	251	251	260
	25.1667	31021	24647	29492	260	257	289	488	483	436	832	825	768	2126	2879	2493	251	247	261
	25.3333	30961	24878	29515	255	260	289	486	480	437	838	820	776	2128	2892	2497	254	250	259
	25.5	31092	25180	29566	253	259	289	480	480	436	840	823	774	2138	2923	2500	251	248	256
	25.6667	31194	25677	29390	256	260	285	485	487	436	837	826	772	2138	2922	2504	250	251	262
	25.8333	31155	25967	29410	253	259	287	483	491	439	838	826	778	2164	2927	2529	249	246	259
	26	31067	26279	29257	257	258	284	488	487	440	838	825	773	2154	2936	2525	253	253	259
	26.1667	31158	26533	29253	256	259	290	486	492	438	838	831	773	2148	2967	2518	251	246	262
	26.3333	31190	26898	29183	255	254	290	492	494	436	848	829	780	2164	2966	2525	252	249	259
	26.5	31066	27227	29122	249	255	286	493	489	438	845	826	775	2157	2965	2540	253	246	259
	26.6667	31069	27511	28976	256	257	287	495	494	443	853	840	787	2168	2980	2551	248	245	258
	26.8333	30972	27964	28908	256	257	289	489	496	443	848	826	773	2175	2990	2554	253	251	253
	27	30994	28175	29054	258	263	289	495	494	439	851	832	778	2168	2990	2572	251	246	257
	27.1667	30810	28485	28844	252	259	285	493	493	445	848	838	780	2178	3007	2584	248	244	253
	27.3333	30627	28502	28904	253	262	285	496	495	445	851	832	780	2184	3024	2592	252	248	253
	27.5	30671	28917	28798	251	260	287	495	497	439	851	838	780	2185	3024	2584	248	247	257
	27.6667	30542	29114	28885	254	258	284	497	493	442	859	835	782	2190	3027	2600	249	250	257
	27.8333	30321	29391	28639	250	257	288	493	496	447	859	838	785	2184	3051	2614	249	247	256
	28	30171	29643	28613	252	261	283	498	501	447	863	840	779	2195	3051	2616	248	247	259
	28.1667	30257	29804	28547	256	256	286	497	498	449	860	842	784	2207	3051	2609	247	246	258
	28.3333	30162	29906	28489	256	257	288	499	500	445	868	842	784	2204	3059	2615	249	245	257
	28.5	30011	30162	28528	257	258	291	499	503	441	862	848	786	2205	3073	2632	245	245	257
	28.6667	29833	30111	28436	256	257	287	496	498	447	866	845	785	2207	3091	2635	246	242	256
	28.8333	29800	30256	28320	253	256	284	501	502	449	873	850	793	2216	3080	2644	247	250	254
	29	29648	30389	28317	256	257	287	497	501	446	866	841	789	2221	3108	2651	249	246	255
	29.1667	29531	30576	28198	254	260	288	504	502	449	869	840	785	2221	3112	2646	250	248	252
	29.3333	29453	30594	28213	254	255	284	499	502	452	874	849	789	2224	3122	2658	248	245	255
	29.5	29398	30564	28162	251	255	287	507	502	452	868	844	792	2237	3131	2664	250	242	255
	29.6667	29282	30815	28201	256	260	286	502	508	453	881	853	784	2225	3135	2664	248	248	259
	29.8333	29238	30812	28167	257	256	286	501	503	449	873	847	788	2224	3135	2678	244	244	252
	30	29168	30957	28073	256	253	285	505	508	456	874	850	791	2237	3152	2696	245	246	256
	30.1667	29112	30993	28093	254	252	282	505	511	455	877	850	794	2241	3147	2692	244	246	256
	30.3333	29047	30953	28033	253	258	288	504	503	455	881	856	796	2240	3158	2700	248	245	257
	30.5	29123	31002	28091	254	260	285	507	508	456	883	851	790	2243	3178	2705	243	244	254
	30.6667	28924	30948	28039	254	260	283	502	508	453	882	855	797	2248	3180	2725	250	243	256
	30.8333	28903	30956	28062	252	260	288	506	505	457	890	849	795	2239	3177	2734	245	245	259
	31	28846	30995	28103	249	256	283	504	509	451	890	855	793	2245	3178	2734	246	243	257
	31.1667	28813	31009	28003	252	253	285	509	513	461	887	854	798	2248	3208	2736	250	246	250
	31.3333	28735	30925	27995	256	257	284	509	510	457	891	859	788	2250	3196	2748	246	245	254
	31.5	28686	30915	27986	252	255	287	507	512	461	891	857	795	2254	3213	2746	246	247	253
	31.6667	28726	30896	28036	250	257	280	508	514	452	893	862	797	2263	3225	2747	246	243	253
	31.8333	28695	30902	28048	256	256	283	506	514	452	899	857	804	2262	3232	2776	243	244	250
	32	28741	30912	27965	256	257	284	514	516	462	908	858	805	2265	3243	2788	245	243	253
	32.1667	28754	30941	28108	253	255	286	512	517	461	901	865	797	2267	3244	2781	244	245	254

## Sheet: Fig. 4c
20 % PSMβ1 preformed seeds
	Time (h)	PSMα1	PSMα1	PSMα2	PSMα2	PSMα2	PSMα3	PSMα3	PSMα3	PSMα4	PSMα4	PSMα4	PSMβ2	PSMβ2	PSMβ2	δ-toxin	δ-toxin	δ-toxin
	0	928	957	1114	1159	1128	898	852	930	928	896	909	2972	3036	2907	885	931	932
	0.166667	855	887	1083	1127	1090	839	784	850	828	811	818	2966	3129	2953	832	858	858
	0.333333	817	845	1130	1202	1115	814	769	837	813	807	815	3093	3676	3406	839	857	874
	0.5	827	862	1331	1365	1275	814	759	850	852	834	858	3422	4310	3997	873	886	884
	0.666667	831	879	1552	1660	1492	837	781	874	949	898	930	3854	4804	4506	885	897	894
	0.833333	861	916	1731	1805	1745	862	803	913	1018	957	980	4312	5211	4931	909	923	924
	1	878	940	1846	1930	1866	903	837	980	1059	1010	1039	4739	5570	5277	928	951	934
	1.16667	896	966	1966	2058	1988	955	870	1070	1116	1060	1069	5065	5856	5545	965	971	963
	1.33333	908	989	2056	2139	2046	1017	914	1137	1148	1089	1110	5396	6113	5819	982	967	980
	1.5	940	1014	2121	2206	2125	1078	979	1217	1188	1131	1138	5699	6260	5989	993	999	996
	1.66667	960	1027	2168	2267	2194	1150	1050	1283	1207	1158	1177	5917	6425	6113	1016	1006	997
	1.83333	964	1037	2235	2302	2239	1222	1114	1323	1245	1190	1196	6180	6556	6288	1035	1026	997
	2	978	1064	2288	2329	2307	1289	1166	1373	1265	1197	1227	6340	6695	6392	1040	1042	1029
	2.16667	984	1075	2335	2377	2350	1351	1238	1405	1282	1226	1248	6540	6792	6525	1060	1052	1017
	2.33333	992	1096	2358	2392	2378	1402	1287	1427	1297	1257	1261	6695	6859	6581	1073	1082	1031
	2.5	1006	1099	2397	2403	2396	1452	1344	1473	1337	1271	1283	6810	6926	6622	1083	1084	1026
	2.66667	1006	1126	2412	2434	2433	1502	1384	1501	1341	1287	1303	6885	6964	6686	1101	1092	1019
	2.83333	1010	1137	2453	2456	2445	1549	1408	1510	1365	1294	1312	7031	7009	6776	1103	1107	1025
	3	1021	1145	2476	2471	2480	1582	1470	1541	1368	1308	1322	7071	7085	6841	1120	1104	1042
	3.16667	1033	1151	2478	2503	2498	1605	1500	1555	1382	1330	1342	7190	7150	6919	1126	1125	1044
	3.33333	1037	1170	2495	2494	2503	1644	1538	1580	1394	1336	1342	7286	7180	7003	1133	1138	1058
	3.5	1044	1173	2531	2538	2528	1669	1563	1596	1401	1345	1356	7337	7307	7057	1147	1138	1064
	3.66667	1054	1183	2545	2551	2558	1706	1587	1611	1402	1354	1371	7384	7396	7143	1146	1143	1072
	3.83333	1063	1185	2565	2576	2554	1739	1619	1637	1404	1357	1395	7477	7558	7377	1157	1156	1065
	4	1062	1199	2561	2595	2588	1791	1637	1651	1418	1364	1384	7497	7737	7539	1163	1157	1080
	4.16667	1061	1211	2600	2622	2585	1802	1683	1666	1426	1371	1395	7537	7907	7744	1177	1166	1084
	4.33333	1071	1223	2592	2625	2602	1835	1694	1692	1421	1377	1404	7555	8118	7983	1194	1176	1088
	4.5	1086	1232	2618	2651	2639	1845	1729	1710	1441	1380	1411	7642	8333	8210	1196	1173	1098
	4.66667	1084	1242	2623	2684	2623	1878	1753	1735	1446	1385	1411	7640	8454	8295	1200	1189	1112
	4.83333	1091	1238	2640	2686	2635	1908	1780	1751	1467	1405	1416	7729	8437	8342	1210	1201	1114
	5	1100	1256	2655	2711	2644	1942	1794	1770	1457	1405	1433	7735	8448	8326	1206	1196	1125
	5.16667	1099	1258	2678	2680	2671	1964	1819	1806	1465	1404	1452	7768	8553	8358	1219	1213	1113
	5.33333	1111	1281	2681	2739	2680	1998	1827	1817	1475	1425	1436	7801	8616	8503	1227	1199	1140
	5.5	1111	1274	2694	2768	2690	2029	1862	1843	1475	1429	1460	7790	8632	8516	1238	1208	1139
	5.66667	1109	1290	2707	2768	2701	2043	1895	1852	1487	1443	1465	7806	8704	8554	1245	1214	1138
	5.83333	1130	1296	2717	2807	2745	2069	1914	1877	1498	1434	1467	7810	8732	8698	1243	1212	1144
	6	1122	1311	2715	2798	2729	2087	1952	1898	1509	1436	1467	7901	8798	8730	1262	1230	1148
	6.16667	1137	1315	2744	2820	2744	2128	1965	1908	1515	1461	1475	7887	8822	8727	1266	1221	1160
	6.33333	1146	1329	2737	2829	2752	2125	2001	1921	1516	1461	1469	7865	8821	8841	1271	1238	1170
	6.5	1152	1328	2749	2869	2776	2147	2007	1934	1524	1472	1479	7927	8862	9074	1278	1230	1167
	6.66667	1157	1348	2755	2871	2763	2168	2025	1941	1535	1479	1487	7949	8925	8896	1275	1237	1176
	6.83333	1166	1365	2791	2885	2777	2189	2046	1963	1541	1487	1494	7991	8936	8924	1276	1258	1194
	7	1173	1378	2788	2891	2793	2217	2078	1964	1539	1494	1501	8004	8965	8947	1266	1254	1171
	7.16667	1181	1385	2805	2930	2793	2216	2098	1982	1547	1489	1505	8021	8976	9057	1286	1264	1175
	7.33333	1199	1392	2796	2942	2809	2230	2110	2022	1550	1500	1508	8015	8977	9164	1289	1260	1191
	7.5	1208	1411	2830	2956	2807	2245	2134	2035	1570	1501	1522	8092	9036	9152	1306	1272	1193
	7.66667	1215	1427	2839	2966	2828	2255	2133	2050	1564	1516	1520	8109	9063	9250	1294	1264	1196
	7.83333	1224	1461	2842	2983	2848	2269	2169	2099	1566	1515	1515	8162	9068	9271	1308	1267	1200
	8	1228	1473	2861	2981	2845	2284	2196	2098	1586	1538	1536	8270	9084	9379	1311	1278	1208
	8.16667	1250	1497	2857	3000	2866	2290	2206	2101	1588	1531	1535	8371	9074	9430	1323	1292	1202
	8.33333	1268	1523	2851	3019	2840	2305	2212	2145	1598	1543	1519	8481	9129	9436	1336	1287	1214
	8.5	1287	1528	2902	3032	2884	2315	2242	2158	1608	1554	1538	8590	9167	9593	1326	1292	1220
	8.66667	1289	1552	2902	3046	2872	2323	2246	2173	1608	1553	1530	8716	9176	9791	1336	1290	1221
	8.83333	1305	1587	2905	3059	2905	2337	2276	2176	1611	1553	1549	8864	9201	9966	1338	1296	1247
	9	1313	1591	2900	3064	2877	2350	2275	2174	1614	1565	1554	8998	9155	10060	1340	1306	1241
	9.16667	1336	1638	2914	3106	2895	2350	2291	2186	1633	1573	1554	9054	9208	10099	1348	1304	1250
	9.33333	1343	1662	2927	3083	2929	2373	2300	2199	1630	1573	1556	9126	9220	10074	1346	1307	1235
	9.5	1384	1681	2947	3116	2912	2375	2309	2241	1640	1571	1561	9183	9234	10148	1361	1321	1236
	9.66667	1396	1732	2945	3124	2918	2385	2315	2238	1632	1575	1564	9179	9361	10225	1359	1314	1246
	9.83333	1409	1779	2950	3150	2918	2382	2324	2298	1656	1591	1573	9245	9308	10257	1364	1325	1250
	10	1446	1818	2965	3158	2933	2409	2335	2296	1654	1589	1570	9296	9341	10217	1360	1330	1254
	10.1667	1471	1850	2987	3182	2953	2413	2346	2294	1656	1592	1578	9305	9334	10315	1374	1336	1260
	10.3333	1502	1912	2969	3182	2949	2423	2349	2296	1647	1594	1585	9323	9363	10410	1369	1333	1253
	10.5	1536	1967	2998	3198	2960	2433	2362	2299	1652	1593	1595	9381	9448	10496	1372	1329	1267
	10.6667	1553	2021	3003	3201	2945	2422	2366	2307	1671	1590	1604	9391	9424	10533	1380	1340	1275
	10.8333	1584	2094	3022	3223	2974	2435	2386	2324	1677	1592	1603	9418	9437	10525	1388	1343	1274
	11	1643	2157	3008	3241	3006	2441	2393	2341	1670	1620	1593	9406	9513	10552	1383	1341	1278
	11.1667	1676	2237	3029	3268	2966	2449	2406	2341	1681	1609	1625	9477	9504	10615	1386	1343	1278
	11.3333	1724	2305	3026	3249	3001	2451	2395	2371	1675	1611	1609	9472	9511	10594	1387	1363	1278
	11.5	1801	2404	3041	3271	3007	2455	2425	2366	1686	1629	1615	9453	9533	10663	1398	1346	1284
	11.6667	1844	2499	3059	3293	2994	2462	2429	2364	1703	1624	1602	9477	9521	10654	1403	1349	1291
	11.8333	1911	2630	3065	3316	3036	2462	2444	2370	1693	1640	1615	9507	9579	10752	1397	1362	1281
	12	2000	2736	3062	3340	3026	2480	2439	2376	1693	1628	1619	9520	9559	10758	1393	1365	1282
	12.1667	2069	2848	3083	3323	3021	2486	2446	2390	1709	1633	1630	9531	9605	10792	1419	1369	1290
	12.3333	2144	2987	3072	3357	3025	2497	2462	2378	1718	1631	1631	9591	9624	10788	1411	1370	1295
	12.5	2211	3141	3098	3359	3046	2516	2481	2397	1703	1646	1618	9641	9645	10852	1424	1388	1302
	12.6667	2309	3317	3112	3366	3045	2520	2477	2377	1714	1651	1628	9654	9703	10933	1426	1392	1315
	12.8333	2407	3447	3104	3380	3065	2503	2482	2395	1717	1656	1637	9593	9672	10917	1429	1382	1312
	13	2505	3678	3106	3393	3067	2526	2479	2407	1725	1659	1639	9624	9740	10985	1436	1393	1313
	13.1667	2656	3831	3131	3390	3070	2511	2477	2381	1718	1661	1639	9650	9715	11033	1426	1383	1307
	13.3333	2757	4082	3132	3429	3092	2520	2488	2412	1736	1659	1652	9661	9743	11006	1448	1396	1311
	13.5	2899	4274	3145	3451	3102	2559	2517	2398	1744	1682	1643	9700	9701	11122	1438	1397	1328
	13.6667	3029	4487	3151	3429	3105	2542	2490	2425	1739	1663	1651	9695	9765	11165	1438	1413	1322
	13.8333	3184	4672	3163	3434	3092	2548	2516	2408	1749	1668	1660	9669	9809	11118	1452	1400	1332
	14	3343	4940	3174	3469	3109	2569	2527	2420	1740	1697	1651	9738	9831	11185	1451	1404	1332
	14.1667	3503	5192	3180	3478	3104	2542	2546	2430	1747	1678	1659	9752	9875	11164	1461	1405	1334
	14.3333	3673	5473	3178	3500	3124	2561	2527	2419	1743	1689	1671	9774	9860	11211	1459	1410	1341
	14.5	3843	5720	3197	3516	3128	2578	2541	2422	1738	1685	1670	9782	9856	11326	1462	1412	1342
	14.6667	4068	6037	3203	3540	3141	2548	2528	2425	1747	1687	1662	9790	9853	11338	1476	1416	1337
	14.8333	4263	6285	3196	3534	3141	2559	2545	2437	1767	1692	1674	9802	9891	11386	1468	1407	1346
	15	4491	6593	3207	3553	3156	2590	2550	2430	1763	1696	1671	9878	9885	11415	1469	1430	1341
	15.1667	4708	6902	3201	3554	3162	2596	2539	2423	1765	1707	1660	9835	9965	11410	1481	1415	1344
	15.3333	4941	7216	3227	3596	3157	2593	2541	2429	1757	1701	1676	9812	9953	11482	1463	1429	1353
	15.5	5198	7468	3233	3582	3141	2590	2556	2417	1764	1709	1670	9840	9990	11460	1478	1426	1350
	15.6667	5414	7787	3230	3620	3158	2564	2557	2455	1756	1693	1674	9885	10042	11529	1479	1431	1348
	15.8333	5700	8088	3245	3637	3170	2583	2552	2445	1774	1714	1681	9922	9998	11565	1487	1429	1356
	16	5961	8492	3252	3644	3159	2580	2576	2471	1782	1704	1680	9924	10020	11631	1495	1428	1348
	16.1667	6221	8802	3262	3647	3170	2579	2565	2461	1776	1710	1691	9888	10020	11645	1502	1422	1362
	16.3333	6520	9101	3279	3667	3185	2579	2566	2477	1780	1705	1691	9983	10036	11614	1492	1449	1357
	16.5	6775	9477	3260	3658	3199	2593	2591	2476	1778	1702	1694	10002	10081	11663	1492	1443	1366
	16.6667	7095	9780	3269	3671	3194	2583	2570	2477	1785	1718	1678	9996	10060	11681	1494	1455	1362
	16.8333	7462	10150	3278	3698	3208	2590	2580	2488	1786	1715	1688	10064	10134	11774	1500	1454	1366
	17	7741	10516	3255	3682	3212	2601	2584	2488	1803	1719	1706	10055	10175	11761	1507	1468	1366
	17.1667	8064	10852	3309	3703	3230	2601	2590	2499	1800	1720	1711	10137	10134	11801	1503	1452	1375
	17.3333	8415	11154	3313	3725	3244	2607	2575	2504	1781	1730	1697	10099	10212	11802	1508	1459	1369
	17.5	8720	11549	3323	3749	3227	2620	2580	2490	1794	1725	1699	10115	10142	11879	1507	1457	1365
	17.6667	9024	11959	3323	3752	3240	2608	2585	2488	1789	1726	1706	10183	10172	11894	1514	1451	1377
	17.8333	9391	12222	3320	3786	3244	2596	2586	2503	1801	1720	1705	10140	10203	11938	1513	1471	1383
	18	9712	12623	3330	3763	3248	2621	2603	2502	1798	1726	1712	10175	10201	12014	1514	1467	1384
	18.1667	10037	12884	3338	3781	3239	2620	2603	2478	1793	1747	1708	10132	10258	11995	1523	1459	1388
	18.3333	10382	13335	3344	3805	3257	2630	2606	2499	1794	1752	1711	10207	10237	12067	1511	1454	1385
	18.5	10778	13631	3333	3825	3264	2619	2599	2527	1811	1727	1717	10202	10232	12017	1507	1472	1381
	18.6667	11055	13902	3350	3826	3272	2608	2596	2515	1803	1735	1732	10248	10266	12006	1529	1476	1383
	18.8333	11361	14276	3362	3822	3262	2620	2608	2516	1807	1742	1730	10226	10264	12101	1525	1481	1386
	19	11717	14638	3352	3837	3266	2609	2611	2507	1814	1746	1719	10215	10261	12108	1535	1480	1403
	19.1667	12073	15009	3375	3836	3277	2632	2618	2513	1814	1759	1728	10268	10322	12154	1533	1483	1393
	19.3333	12362	15370	3407	3858	3278	2622	2611	2518	1834	1741	1725	10271	10301	12223	1531	1468	1399
	19.5	12773	15763	3389	3882	3277	2617	2615	2507	1825	1761	1720	10243	10358	12162	1533	1474	1400
	19.6667	13099	16037	3397	3901	3288	2632	2608	2517	1819	1757	1740	10315	10361	12268	1551	1492	1395
	19.8333	13501	16385	3397	3923	3295	2640	2618	2515	1822	1760	1751	10303	10381	12202	1547	1482	1391
	20	13855	16724	3425	3920	3297	2627	2625	2532	1834	1774	1723	10405	10368	12260	1527	1492	1416
	20.1667	14103	17075	3413	3962	3311	2633	2616	2508	1825	1755	1749	10361	10413	12324	1543	1502	1412
	20.3333	14555	17380	3412	3939	3316	2624	2631	2497	1840	1776	1747	10398	10453	12306	1549	1492	1395
	20.5	14904	17752	3420	3935	3321	2643	2624	2526	1841	1773	1742	10402	10416	12410	1545	1493	1408
	20.6667	15232	18120	3422	3964	3328	2648	2641	2530	1830	1753	1739	10384	10458	12425	1542	1499	1423
	20.8333	15628	18467	3438	3992	3320	2627	2626	2500	1827	1787	1742	10380	10437	12433	1545	1491	1420
	21	15968	18761	3443	3989	3334	2619	2626	2526	1838	1783	1759	10453	10451	12467	1556	1502	1411
	21.1667	16238	19076	3474	4001	3336	2650	2633	2514	1844	1769	1750	10473	10536	12499	1563	1497	1416
	21.3333	16658	19487	3470	4020	3350	2650	2656	2519	1855	1779	1748	10487	10472	12478	1565	1511	1425
	21.5	16956	19744	3457	4034	3356	2662	2640	2514	1844	1786	1737	10447	10545	12572	1546	1507	1427
	21.6667	17268	20065	3465	4024	3372	2647	2645	2544	1844	1788	1769	10486	10509	12604	1554	1513	1423
	21.8333	17639	20314	3455	4050	3348	2643	2627	2517	1850	1802	1752	10487	10543	12596	1560	1511	1433
	22	18038	20567	3486	4052	3341	2635	2641	2516	1849	1794	1766	10515	10539	12622	1555	1501	1427
	22.1667	18265	21024	3483	4061	3356	2645	2650	2523	1853	1792	1760	10504	10595	12621	1585	1497	1416
	22.3333	18570	21285	3494	4083	3346	2652	2635	2528	1859	1808	1774	10516	10598	12679	1581	1501	1430
	22.5	18920	21539	3492	4082	3359	2645	2641	2508	1844	1808	1772	10554	10611	12653	1568	1519	1433
	22.6667	19215	21834	3506	4076	3385	2640	2635	2517	1869	1802	1778	10560	10654	12684	1558	1512	1410
	22.8333	19523	22070	3509	4108	3367	2641	2642	2528	1858	1810	1768	10561	10659	12717	1567	1521	1431
	23	19757	22377	3506	4125	3359	2656	2648	2509	1858	1817	1779	10593	10621	12784	1569	1527	1428
	23.1667	20084	22655	3519	4122	3373	2654	2657	2519	1856	1808	1783	10640	10639	12766	1580	1529	1425
	23.3333	20398	22946	3529	4148	3377	2656	2647	2512	1875	1813	1788	10602	10676	12782	1579	1538	1436
	23.5	20785	23187	3567	4161	3395	2639	2653	2502	1873	1811	1782	10632	10656	12811	1581	1523	1434
	23.6667	20995	23458	3527	4194	3393	2654	2666	2532	1868	1829	1800	10640	10690	12876	1581	1536	1436
	23.8333	21338	23764	3559	4188	3408	2630	2651	2526	1875	1815	1785	10620	10714	12862	1590	1530	1428
	24	21653	24011	3543	4200	3417	2663	2656	2530	1862	1821	1800	10654	10688	12921	1587	1536	1442
	24.1667	21967	24311	3537	4216	3404	2675	2673	2535	1882	1830	1791	10713	10737	12965	1574	1539	1449
	24.3333	22190	24557	3569	4217	3427	2659	2645	2546	1878	1842	1800	10701	10719	12977	1588	1533	1464
	24.5	22442	24817	3568	4209	3423	2653	2651	2543	1888	1835	1805	10712	10791	13011	1586	1539	1436
	24.6667	22652	25060	3572	4241	3417	2647	2674	2528	1889	1845	1818	10734	10770	13015	1575	1547	1451
	24.8333	22920	25311	3569	4259	3424	2656	2679	2519	1888	1836	1815	10737	10774	13068	1579	1540	1452
	25	23215	25622	3570	4257	3461	2656	2648	2544	1898	1848	1818	10820	10773	13054	1590	1545	1448
	25.1667	23443	25926	3587	4261	3456	2658	2656	2521	1886	1852	1809	10807	10767	13077	1602	1544	1458
	25.3333	23651	26165	3599	4312	3464	2662	2652	2534	1888	1841	1809	10785	10847	13061	1589	1554	1460
	25.5	23891	26307	3605	4295	3456	2644	2666	2528	1892	1856	1817	10824	10850	13149	1603	1548	1448
	25.6667	24104	26497	3608	4310	3466	2657	2680	2545	1893	1854	1831	10811	10822	13207	1587	1546	1470
	25.8333	24436	26845	3599	4311	3477	2660	2657	2554	1914	1866	1834	10842	10872	13229	1613	1561	1458
	26	24591	26980	3624	4324	3479	2654	2663	2540	1902	1866	1843	10900	10851	13216	1598	1565	1462
	26.1667	24679	27202	3623	4325	3465	2666	2669	2525	1907	1859	1826	10821	10878	13203	1607	1548	1465
	26.3333	24995	27410	3653	4342	3473	2666	2695	2518	1914	1871	1833	10868	10848	13273	1591	1554	1462
	26.5	25188	27507	3639	4354	3473	2667	2670	2531	1894	1871	1837	10870	10905	13270	1623	1557	1460
	26.6667	25532	27796	3650	4375	3486	2662	2663	2538	1903	1880	1836	10930	10901	13310	1616	1558	1466
	26.8333	25620	27936	3631	4377	3485	2652	2661	2531	1908	1871	1845	10876	10879	13327	1601	1546	1470
	27	25862	28111	3646	4385	3463	2678	2672	2535	1909	1887	1842	10899	10983	13337	1608	1564	1476
	27.1667	25961	28229	3644	4407	3495	2666	2697	2528	1919	1891	1838	10970	10941	13426	1612	1556	1476
	27.3333	26271	28416	3657	4410	3480	2663	2668	2535	1918	1883	1862	10956	10998	13386	1614	1557	1478
	27.5	26400	28511	3658	4424	3506	2661	2676	2535	1924	1902	1843	10979	10948	13455	1623	1561	1484
	27.6667	26646	28633	3670	4416	3510	2671	2651	2541	1930	1888	1863	10960	11011	13474	1609	1567	1476
	27.8333	26785	28704	3667	4459	3511	2664	2674	2559	1935	1909	1861	11008	10995	13414	1614	1573	1482
	28	26856	28896	3668	4442	3520	2686	2669	2549	1940	1902	1860	10981	11009	13470	1607	1559	1470
	28.1667	27052	28916	3689	4431	3510	2653	2664	2538	1948	1913	1857	10934	10999	13497	1622	1569	1484
	28.3333	27180	28909	3656	4492	3522	2662	2685	2540	1931	1905	1876	11042	10998	13537	1613	1567	1475
	28.5	27291	29029	3690	4478	3532	2660	2690	2551	1939	1903	1883	11045	11074	13526	1629	1573	1481
	28.6667	27412	29053	3690	4479	3518	2675	2683	2537	1939	1916	1879	11057	11049	13570	1629	1577	1475
	28.8333	27452	29141	3693	4505	3521	2681	2660	2550	1938	1916	1872	11070	11054	13546	1620	1573	1481
	29	27697	29314	3679	4501	3516	2672	2669	2552	1941	1934	1876	11067	11056	13588	1635	1577	1476
	29.1667	27685	29306	3705	4549	3535	2666	2669	2553	1954	1923	1895	11086	11115	13637	1633	1579	1501
	29.3333	27769	29394	3716	4541	3538	2667	2681	2554	1953	1940	1876	11085	11108	13697	1622	1586	1487
	29.5	27887	29538	3723	4547	3546	2651	2679	2549	1959	1937	1892	11126	11143	13667	1627	1589	1489
	29.6667	27935	29531	3760	4556	3550	2666	2690	2565	1953	1935	1888	11160	11109	13661	1626	1585	1482
	29.8333	28096	29642	3717	4569	3543	2672	2662	2539	1955	1962	1894	11134	11187	13727	1631	1569	1487
	30	28094	29691	3740	4566	3556	2678	2663	2547	1962	1934	1900	11204	11158	13747	1639	1583	1493
	30.1667	28253	29746	3734	4603	3547	2670	2676	2556	1963	1954	1906	11169	11172	13705	1644	1585	1494
	30.3333	28236	29966	3726	4572	3542	2674	2682	2548	1958	1946	1911	11176	11169	13802	1631	1575	1501
	30.5	28345	29910	3769	4615	3561	2690	2708	2559	1945	1942	1902	11240	11233	13790	1634	1583	1494
	30.6667	28472	29967	3751	4623	3556	2673	2679	2533	1969	1951	1911	11178	11273	13739	1619	1591	1510
	30.8333	28415	30238	3763	4600	3585	2681	2700	2566	1976	1966	1931	11155	11298	13824	1640	1578	1502
	31	28539	30339	3746	4625	3563	2673	2687	2563	1966	1969	1907	11275	11298	13838	1642	1583	1494
	31.1667	28506	30379	3771	4645	3575	2655	2687	2542	1980	1982	1920	11217	11293	13890	1636	1575	1498
	31.3333	28534	30614	3760	4653	3568	2673	2690	2555	1994	1972	1928	11244	11330	13900	1632	1583	1499
	31.5	28521	30629	3806	4669	3587	2682	2698	2550	1975	1983	1930	11259	11381	13936	1635	1593	1505
	31.6667	28541	30812	3792	4625	3591	2683	2690	2563	1983	1974	1927	11280	11369	13924	1646	1597	1502
	31.8333	28372	30855	3806	4641	3594	2690	2694	2563	1987	1974	1937	11286	11407	13941	1657	1599	1505
	32	28230	31233	3804	4684	3583	2659	2693	2571	1977	1993	1940	11317	11372	14010	1647	1589	1517

## Sheet: Fig. 4d
20 % PSMβ2 preformed seeds
	Time (h)	PSMα1	PSMα1	PSMα1	PSMα2	PSMα2	PSMα2	PSMα3	PSMα3	PSMα3	PSMα4	PSMα4	PSMα4	PSMβ1	PSMβ1	PSMβ1	δ-toxin	δ-toxin	δ-toxin
	0	1181	1359	1166	2032	1463	1314	309	277	298	673	681	536	559	598	511	274	339	535
	0.166667	1134	1303	1073	1792	1373	1325	500	674	390	486	485	388	511	577	512	251	387	800
	0.333333	1139	1306	1369	1760	1395	1328	6066	6298	4715	430	429	353	549	649	519	385	562	996
	0.5	1124	1292	1621	1739	1391	1330	7134	6734	5082	408	393	350	604	754	526	709	820	1215
	0.666667	1099	1261	1700	1744	1396	1326	7396	6819	5019	411	324	352	658	840	540	925	1022	1377
	0.833333	1087	1244	1741	1749	1400	1337	7515	6857	4945	423	313	361	705	907	566	1063	1165	1494
	1	1081	1253	1788	1750	1415	1344	7558	6790	4830	432	345	365	752	968	594	1160	1291	1577
	1.16667	1082	1253	1797	1764	1419	1352	7555	6755	4720	437	383	373	794	1022	620	1238	1361	1665
	1.33333	1082	1253	1828	1778	1437	1359	7546	6658	4633	442	403	383	841	1075	651	1302	1435	1725
	1.5	1082	1257	1849	1788	1444	1371	7542	6591	4527	448	421	384	880	1116	697	1354	1493	1792
	1.66667	1083	1256	1859	1804	1455	1381	7527	6491	4428	456	437	390	918	1157	745	1399	1539	1831
	1.83333	1091	1266	1877	1813	1461	1382	7487	6393	4365	458	444	392	953	1181	791	1434	1577	1880
	2	1088	1258	1882	1828	1467	1395	7460	6329	4280	462	457	402	978	1204	834	1475	1621	1921
	2.16667	1084	1259	1911	1828	1480	1401	7420	6222	4216	468	458	406	1004	1218	868	1504	1640	1948
	2.33333	1084	1256	1908	1835	1489	1397	7356	6164	4146	470	471	406	1025	1243	902	1544	1660	1964
	2.5	1085	1265	1922	1846	1499	1407	7307	6055	4069	471	477	411	1046	1256	919	1551	1689	1991
	2.66667	1088	1267	1918	1847	1500	1405	7277	5972	4010	478	484	416	1064	1255	934	1568	1712	2022
	2.83333	1094	1270	1936	1868	1500	1413	7205	5900	3950	482	488	416	1083	1267	946	1592	1732	2046
	3	1093	1265	1935	1865	1505	1416	7144	5823	3887	482	491	417	1079	1270	962	1597	1736	2051
	3.16667	1085	1262	1935	1866	1512	1428	7106	5742	3847	488	499	427	1101	1285	963	1612	1754	2072
	3.33333	1090	1264	1942	1882	1506	1420	7050	5681	3790	488	506	427	1110	1290	985	1627	1770	2082
	3.5	1089	1270	1944	1882	1510	1428	6990	5589	3737	491	504	429	1116	1306	990	1638	1766	2084
	3.66667	1080	1268	1942	1877	1520	1428	6958	5518	3685	491	510	429	1121	1304	988	1651	1785	2095
	3.83333	1092	1269	1948	1880	1526	1433	6878	5446	3625	495	513	434	1126	1308	1007	1667	1795	2117
	4	1085	1267	1947	1889	1528	1440	6823	5387	3601	496	515	443	1140	1312	999	1665	1815	2130
	4.16667	1082	1262	1957	1892	1526	1443	6782	5313	3552	494	513	441	1141	1320	1008	1678	1825	2140
	4.33333	1088	1268	1953	1889	1527	1444	6742	5249	3506	501	521	448	1153	1328	1013	1695	1823	2152
	4.5	1089	1272	1960	1895	1539	1452	6700	5197	3476	501	527	447	1156	1326	1021	1701	1835	2159
	4.66667	1091	1277	1960	1906	1544	1442	6622	5117	3426	505	531	449	1160	1330	1024	1713	1841	2158
	4.83333	1083	1267	1965	1909	1539	1446	6577	5036	3413	504	530	448	1166	1343	1027	1709	1839	2174
	5	1082	1270	1962	1915	1550	1452	6523	5000	3353	510	533	453	1174	1346	1029	1714	1852	2173
	5.16667	1094	1267	1970	1922	1545	1452	6515	4924	3319	512	535	454	1171	1344	1034	1724	1854	2172
	5.33333	1089	1269	1959	1917	1551	1460	6454	4872	3297	514	533	456	1184	1350	1037	1718	1852	2179
	5.5	1087	1270	1962	1926	1556	1455	6386	4825	3259	515	540	458	1192	1349	1033	1738	1861	2191
	5.66667	1086	1268	1974	1931	1554	1461	6332	4760	3202	521	540	462	1194	1351	1043	1742	1866	2211
	5.83333	1092	1271	1972	1930	1563	1470	6309	4701	3170	520	545	465	1191	1356	1044	1747	1872	2205
	6	1090	1274	1984	1936	1562	1465	6252	4650	3142	519	545	466	1190	1357	1045	1757	1881	2215
	6.16667	1095	1277	1974	1933	1561	1473	6195	4588	3106	522	547	465	1199	1364	1048	1768	1885	2242
	6.33333	1082	1273	1974	1948	1565	1467	6166	4527	3079	524	550	470	1199	1371	1054	1761	1882	2225
	6.5	1083	1274	1979	1945	1564	1471	6101	4483	3050	522	549	466	1214	1371	1059	1765	1894	2233
	6.66667	1086	1274	1980	1953	1576	1474	6014	4426	3003	527	548	466	1208	1381	1058	1774	1900	2244
	6.83333	1093	1277	1987	1958	1569	1480	6027	4385	2994	530	552	474	1222	1372	1061	1777	1877	2258
	7	1093	1272	1991	1961	1573	1480	5954	4326	2956	528	556	476	1219	1374	1067	1782	1896	2255
	7.16667	1095	1278	1999	1958	1574	1481	5926	4285	2906	532	561	480	1228	1378	1070	1788	1902	2258
	7.33333	1092	1286	1996	1965	1579	1483	5868	4225	2894	530	554	480	1229	1392	1074	1790	1895	2276
	7.5	1099	1281	1998	1980	1578	1484	5821	4194	2847	534	556	479	1228	1398	1066	1791	1902	2277
	7.66667	1093	1287	2004	1971	1575	1485	5761	4121	2812	538	561	480	1228	1392	1075	1803	1904	2272
	7.83333	1105	1288	2013	1963	1585	1492	5723	4095	2811	540	563	483	1227	1400	1077	1801	1911	2284
	8	1105	1294	2015	1982	1588	1483	5671	4037	2785	540	562	484	1248	1400	1072	1810	1923	2295
	8.16667	1105	1303	2025	1989	1593	1483	5613	4005	2755	542	564	485	1241	1400	1081	1813	1919	2305
	8.33333	1115	1306	2036	1975	1585	1497	5578	3958	2715	547	564	485	1242	1398	1081	1816	1920	2292
	8.5	1119	1312	2050	1989	1593	1492	5496	3930	2694	548	566	495	1242	1413	1085	1814	1926	2295
	8.66667	1123	1319	2044	1988	1595	1496	5495	3891	2668	545	572	491	1247	1411	1086	1821	1918	2308
	8.83333	1139	1322	2066	1994	1598	1499	5423	3843	2670	547	568	491	1251	1411	1087	1825	1926	2311
	9	1150	1342	2072	1992	1600	1492	5405	3819	2623	551	570	496	1250	1411	1088	1830	1938	2323
	9.16667	1152	1350	2096	2001	1601	1493	5337	3762	2617	551	570	489	1264	1414	1093	1828	1936	2325
	9.33333	1173	1375	2100	1999	1602	1495	5289	3729	2582	548	573	497	1251	1423	1089	1831	1948	2337
	9.5	1203	1390	2125	2006	1609	1508	5250	3691	2563	548	576	498	1261	1428	1101	1828	1944	2340
	9.66667	1234	1411	2153	2006	1615	1511	5215	3642	2551	553	574	496	1259	1422	1097	1834	1936	2333
	9.83333	1266	1449	2178	2007	1613	1505	5164	3633	2538	553	574	500	1261	1415	1095	1835	1948	2340
	10	1332	1475	2212	2024	1611	1508	5111	3575	2514	556	579	496	1262	1432	1109	1835	1946	2350
	10.1667	1408	1516	2232	2013	1614	1512	5075	3562	2486	554	576	503	1270	1423	1097	1841	1936	2345
	10.3333	1496	1564	2298	2021	1622	1512	5038	3515	2469	557	580	499	1275	1432	1101	1833	1953	2353
	10.5	1618	1621	2357	2023	1620	1514	4987	3479	2443	562	584	507	1272	1434	1106	1852	1962	2359
	10.6667	1764	1684	2434	2023	1619	1515	4935	3441	2429	561	583	506	1277	1431	1114	1859	1955	2364
	10.8333	1937	1768	2513	2036	1627	1516	4888	3409	2411	561	578	505	1280	1442	1113	1850	1956	2359
	11	2131	1875	2630	2039	1630	1507	4860	3397	2390	564	585	512	1278	1446	1114	1850	1964	2373
	11.1667	2381	1996	2750	2024	1628	1516	4829	3378	2361	566	585	507	1285	1448	1118	1866	1966	2373
	11.3333	2695	2146	2894	2029	1629	1523	4780	3338	2365	571	589	512	1282	1439	1118	1860	1974	2371
	11.5	3064	2330	3064	2031	1630	1518	4754	3293	2337	567	595	512	1290	1444	1119	1869	1974	2374
	11.6667	3451	2557	3241	2032	1624	1517	4714	3271	2313	567	589	512	1294	1452	1123	1875	1968	2379
	11.8333	3832	2832	3482	2035	1631	1526	4680	3254	2315	573	596	514	1298	1449	1130	1872	1967	2399
	12	4236	3143	3742	2042	1629	1529	4641	3231	2288	571	591	518	1291	1457	1120	1877	1975	2389
	12.1667	4617	3475	4032	2047	1634	1536	4585	3189	2268	568	596	516	1290	1459	1129	1875	1985	2398
	12.3333	5104	3824	4366	2040	1637	1536	4577	3174	2252	571	595	514	1300	1456	1129	1881	1982	2408
	12.5	5636	4239	4765	2045	1634	1527	4545	3140	2229	574	593	515	1297	1455	1131	1878	1974	2414
	12.6667	6336	4648	5166	2041	1636	1529	4464	3113	2227	579	595	520	1297	1460	1128	1880	1977	2427
	12.8333	6904	5106	5646	2040	1639	1534	4454	3107	2201	579	600	521	1299	1458	1133	1885	1981	2413
	13	7320	5718	6148	2052	1640	1521	4398	3065	2188	574	601	523	1307	1457	1137	1896	1987	2416
	13.1667	7681	6392	6701	2047	1645	1530	4368	3044	2177	578	601	520	1307	1463	1138	1890	1987	2420
	13.3333	7999	6926	7293	2045	1647	1533	4351	3031	2160	580	607	520	1302	1470	1137	1887	1994	2433
	13.5	8317	7310	7889	2053	1640	1531	4323	3009	2147	580	605	523	1310	1467	1142	1890	2008	2433
	13.6667	8597	7642	8542	2057	1647	1530	4287	2980	2121	581	604	523	1313	1476	1145	1885	1989	2419
	13.8333	8904	7899	9173	2052	1645	1534	4256	2960	2113	580	602	525	1309	1480	1135	1897	1992	2445
	14	9148	8248	9827	2057	1648	1530	4201	2939	2103	585	605	525	1300	1469	1144	1902	2005	2446
	14.1667	9402	8537	10516	2055	1643	1532	4178	2935	2082	582	612	527	1310	1474	1147	1893	1998	2447
	14.3333	9697	8876	11169	2051	1638	1531	4136	2896	2058	580	606	528	1310	1470	1149	1907	2012	2437
	14.5	9940	9213	11736	2066	1649	1538	4122	2886	2055	583	610	529	1315	1475	1144	1899	2004	2452
	14.6667	10220	9562	12362	2054	1646	1539	4071	2866	2048	589	608	527	1318	1482	1149	1904	2009	2464
	14.8333	10477	9931	12908	2058	1655	1546	4055	2852	2017	589	619	534	1321	1477	1157	1908	2012	2477
	15	10738	10304	13410	2064	1647	1539	4031	2821	2019	588	612	529	1311	1481	1152	1914	1999	2457
	15.1667	11035	10684	13717	2070	1652	1545	3970	2817	1990	588	613	531	1316	1486	1155	1910	2015	2464
	15.3333	11315	11029	14046	2061	1660	1535	3954	2788	1987	590	618	536	1325	1494	1160	1908	2017	2465
	15.5	11583	11430	14216	2069	1655	1542	3950	2780	1972	593	619	534	1324	1490	1147	1907	2023	2468
	15.6667	11865	11796	14454	2070	1661	1548	3920	2778	1956	591	616	533	1324	1480	1160	1923	2022	2472
	15.8333	12210	12170	14568	2064	1651	1550	3889	2765	1944	587	618	538	1324	1490	1160	1924	2030	2474
	16	12434	12471	14562	2074	1657	1544	3850	2733	1930	596	620	537	1323	1493	1158	1914	2026	2479
	16.1667	12716	12764	14654	2074	1659	1548	3831	2730	1911	602	621	539	1325	1493	1165	1923	2021	2485
	16.3333	13009	13059	14641	2067	1662	1545	3781	2708	1895	596	621	539	1332	1497	1163	1929	2025	2489
	16.5	13253	13279	14654	2074	1657	1546	3774	2698	1900	595	619	538	1330	1495	1162	1919	2039	2499
	16.6667	13498	13511	14793	2082	1664	1554	3752	2687	1866	594	621	540	1331	1495	1166	1925	2039	2500
	16.8333	13734	13597	14813	2084	1664	1553	3735	2670	1864	600	621	545	1335	1494	1173	1936	2037	2490
	17	13901	13751	14991	2078	1667	1548	3699	2658	1859	596	618	538	1337	1504	1171	1923	2028	2494
	17.1667	14154	13784	15109	2091	1670	1556	3660	2653	1847	599	624	537	1328	1496	1183	1932	2035	2496
	17.3333	14338	13848	15208	2086	1659	1555	3651	2632	1831	599	626	542	1336	1496	1164	1935	2038	2501
	17.5	14413	13789	15324	2078	1670	1557	3617	2620	1830	601	623	541	1335	1517	1177	1931	2042	2510
	17.6667	14557	13684	15367	2087	1668	1553	3582	2612	1815	598	626	543	1342	1504	1174	1940	2039	2514
	17.8333	14576	13609	15375	2088	1662	1549	3570	2598	1802	608	626	545	1339	1510	1177	1939	2045	2531
	18	14639	13520	15500	2073	1663	1549	3542	2589	1790	605	620	544	1343	1508	1173	1932	2037	2522
	18.1667	14559	13379	15521	2089	1668	1554	3524	2579	1785	608	629	548	1338	1503	1181	1948	2040	2536
	18.3333	14596	13302	15557	2084	1677	1552	3514	2567	1757	608	634	549	1344	1510	1176	1940	2061	2522
	18.5	14496	13293	15591	2092	1669	1555	3478	2559	1759	610	631	543	1344	1504	1178	1950	2058	2529
	18.6667	14424	13187	15626	2095	1675	1552	3456	2560	1753	612	633	551	1350	1513	1180	1949	2058	2535
	18.8333	14387	13142	15723	2082	1669	1554	3428	2538	1739	608	629	554	1352	1510	1188	1954	2057	2520
	19	14356	13237	15711	2101	1679	1562	3401	2529	1735	607	636	556	1347	1510	1184	1952	2059	2538
	19.1667	14245	13225	15830	2098	1681	1562	3389	2532	1717	608	634	554	1356	1514	1189	1951	2061	2538
	19.3333	14227	13214	15887	2101	1679	1563	3379	2509	1705	615	638	547	1346	1520	1189	1951	2059	2532
	19.5	14259	13261	15920	2090	1671	1566	3332	2502	1685	614	634	556	1347	1518	1191	1959	2070	2545
	19.6667	14300	13330	16039	2090	1683	1562	3335	2484	1676	613	636	552	1347	1521	1191	1959	2081	2542
	19.8333	14292	13406	16062	2102	1693	1568	3299	2477	1681	616	638	555	1349	1515	1189	1964	2068	2553
	20	14317	13440	16153	2097	1684	1563	3284	2465	1664	616	638	555	1349	1523	1196	1955	2064	2563
	20.1667	14345	13485	16210	2102	1683	1561	3272	2449	1651	618	639	559	1351	1520	1193	1967	2067	2553
	20.3333	14344	13554	16282	2109	1685	1567	3262	2457	1638	620	637	554	1355	1522	1197	1966	2064	2563
	20.5	14460	13590	16297	2105	1688	1563	3213	2428	1632	614	646	559	1354	1531	1199	1969	2069	2572
	20.6667	14487	13647	16346	2100	1688	1569	3194	2423	1637	620	642	555	1356	1529	1202	1964	2062	2566
	20.8333	14542	13661	16446	2109	1688	1571	3193	2417	1618	623	643	555	1360	1525	1200	1963	2077	2570
	21	14606	13713	16449	2110	1699	1571	3171	2402	1602	622	644	559	1355	1529	1199	1960	2060	2564
	21.1667	14581	13769	16525	2109	1683	1576	3157	2395	1606	623	641	558	1357	1535	1190	1956	2070	2577
	21.3333	14654	13765	16579	2103	1683	1573	3140	2387	1587	625	645	557	1366	1536	1197	1979	2074	2572
	21.5	14678	13842	16578	2111	1689	1573	3110	2370	1585	621	646	565	1358	1535	1209	1974	2064	2579
	21.6667	14791	13889	16624	2107	1691	1575	3104	2375	1574	624	651	555	1353	1539	1205	1974	2075	2568
	21.8333	14838	13921	16676	2108	1693	1571	3080	2362	1561	623	650	562	1363	1532	1193	1971	2081	2575
	22	14880	13916	16736	2112	1689	1571	3069	2350	1560	623	645	563	1366	1534	1203	1972	2074	2580
	22.1667	14887	13951	16818	2117	1700	1579	3054	2339	1548	630	651	565	1372	1547	1204	1976	2089	2592
	22.3333	14863	13952	16712	2108	1699	1578	3035	2340	1532	625	652	570	1365	1535	1203	1978	2081	2578
	22.5	14895	13994	16742	2109	1688	1577	3009	2324	1537	626	649	567	1362	1537	1204	1983	2087	2581
	22.6667	14963	14003	16791	2100	1698	1575	2977	2320	1517	628	651	571	1366	1539	1209	1984	2091	2601
	22.8333	14958	13975	16779	2119	1692	1575	2975	2308	1516	632	653	566	1371	1537	1217	1987	2092	2591
	23	15025	14060	16792	2119	1695	1578	2964	2293	1502	629	653	569	1368	1538	1212	1989	2082	2602
	23.1667	15079	13995	16889	2123	1702	1565	2933	2294	1489	635	652	574	1365	1540	1209	1983	2088	2604
	23.3333	15057	14006	16800	2118	1705	1573	2919	2289	1495	631	651	569	1373	1539	1210	1988	2083	2608
	23.5	15091	14111	16924	2108	1705	1577	2917	2277	1480	631	658	574	1372	1542	1213	1974	2094	2607
	23.6667	15024	14061	16875	2116	1707	1576	2893	2255	1477	633	658	571	1365	1542	1218	1982	2096	2599
	23.8333	15158	14037	16901	2126	1702	1577	2870	2253	1470	638	655	570	1372	1540	1221	1987	2097	2606
	24	15113	14070	16905	2119	1711	1579	2863	2250	1459	637	653	573	1373	1542	1223	1989	2085	2607
	24.1667	15175	14066	16973	2127	1707	1584	2848	2236	1447	638	658	573	1370	1545	1222	1992	2095	2610
	24.3333	15173	14082	16965	2132	1700	1568	2832	2230	1434	637	657	572	1372	1552	1224	2006	2095	2613
	24.5	15241	14136	16868	2117	1703	1579	2820	2221	1435	635	657	580	1379	1556	1220	1995	2111	2624
	24.6667	15177	14116	16951	2136	1698	1582	2802	2213	1432	636	667	576	1379	1549	1225	1997	2104	2634
	24.8333	15285	14153	16938	2122	1708	1589	2784	2191	1425	640	660	574	1374	1551	1224	1994	2104	2626
	25	15137	14095	16970	2122	1711	1586	2788	2192	1415	640	661	575	1382	1554	1224	1995	2099	2630
	25.1667	15203	14129	16968	2127	1708	1581	2772	2186	1408	636	665	581	1375	1549	1225	1994	2102	2635
	25.3333	15258	14146	16957	2127	1712	1594	2755	2190	1397	643	660	575	1386	1562	1226	2005	2104	2633
	25.5	15301	14162	16958	2131	1710	1585	2736	2166	1404	645	666	578	1388	1561	1225	1997	2109	2635
	25.6667	15264	14117	16954	2141	1711	1584	2734	2163	1388	640	669	578	1391	1558	1233	2004	2104	2640
	25.8333	15270	14177	17034	2136	1709	1588	2696	2159	1370	643	666	579	1376	1550	1230	2005	2114	2643
	26	15368	14227	17002	2136	1709	1589	2715	2144	1373	642	669	581	1391	1551	1229	2000	2117	2645
	26.1667	15340	14217	16991	2133	1702	1603	2686	2138	1368	646	667	586	1390	1554	1234	1993	2117	2654
	26.3333	15347	14228	16987	2131	1713	1591	2686	2132	1362	647	666	585	1381	1563	1231	2008	2106	2633
	26.5	15305	14224	16997	2132	1715	1590	2666	2124	1350	646	670	580	1382	1561	1237	2004	2117	2649
	26.6667	15366	14209	17020	2147	1722	1584	2643	2110	1351	648	666	581	1385	1561	1236	2010	2117	2660
	26.8333	15347	14240	17026	2145	1721	1596	2656	2109	1341	646	672	586	1386	1564	1239	2014	2123	2642
	27	15384	14243	17018	2132	1713	1594	2634	2099	1336	649	671	588	1387	1562	1237	2011	2119	2658
	27.1667	15431	14212	17072	2146	1712	1592	2624	2084	1335	646	672	583	1391	1567	1239	2000	2125	2654
	27.3333	15355	14248	16997	2149	1717	1600	2599	2084	1319	653	671	584	1392	1558	1240	1997	2123	2662
	27.5	15444	14272	17006	2127	1718	1595	2602	2074	1320	660	669	587	1389	1573	1246	2017	2118	2663
	27.6667	15449	14275	16996	2127	1720	1598	2587	2074	1318	646	677	584	1387	1569	1244	2016	2130	2670
	27.8333	15480	14237	17012	2134	1729	1595	2575	2058	1307	652	676	590	1390	1561	1238	2012	2129	2663
	28	15494	14247	17053	2149	1729	1603	2557	2056	1299	648	670	591	1389	1572	1245	2022	2124	2674
	28.1667	15485	14270	17010	2152	1720	1609	2562	2058	1293	654	675	590	1385	1571	1249	2009	2126	2676
	28.3333	15438	14322	17075	2141	1715	1596	2552	2037	1299	655	675	593	1398	1575	1246	2009	2127	2680
	28.5	15482	14298	17031	2144	1724	1593	2531	2034	1284	660	674	594	1393	1564	1251	2011	2126	2665
	28.6667	15510	14303	17028	2137	1721	1600	2519	2030	1290	656	682	595	1395	1569	1245	2017	2137	2685
	28.8333	15550	14315	17067	2150	1735	1608	2520	2016	1274	657	676	595	1386	1568	1253	2021	2127	2694
	29	15535	14303	17032	2141	1724	1602	2498	2011	1272	656	675	591	1391	1572	1245	2024	2132	2684
