# Supplementary material for: Cross-talk between individual phenol-soluble modulins in Staphylococcus aureus biofilm enables rapid and efficient amyloid formation
Source: eLife. 2020 Dec 1;9:e59776. doi: 10.7554/eLife.59776 (PMC7732344; doi:10.7554/eLife.59776)
Supplement: Figure 4—figure supplement 2—source data 1. [file elife-59776-fig4-figsupp2-data1.xlsx]

## Sheet: Sup. Fig. 8
CamSol Analysis
	aa	PSMα1	aa	PSMα2	aa	PSMα3	aa	PSMα4	aa	PSMβ1	aa	PSMβ2	aa	δ-toxin
	1	-1.80898	1	-1.80898	1	-1.45087	1	-2.31095	1	0.224431	1	-1.02616	1	0.394095
	2	-1.5406	2	-1.5406	2	-1.2495	2	-1.67097	2	-0.634093	2	-0.894176	2	-0.274206
	3	-1.13022	3	-1.13022	3	-0.570546	3	-1.55765	3	-0.267805	3	-0.098806	3	-0.730722
	4	-1.41084	4	-1.41084	4	-0.828986	4	-1.7772	4	-0.296199	4	-0.108276	4	-0.523432
	5	-1.59926	5	-1.59926	5	-1.11979	5	-1.96563	5	-0.536771	5	-0.303393	5	-0.414015
	6	-1.23598	6	-1.23598	6	-1.08912	6	-1.40863	6	-0.660174	6	-0.223866	6	-0.800057
	7	-1.28538	7	-1.33588	7	-1.03425	7	-1.36491	7	-0.326563	7	-0.140511	7	-0.721871
	8	-1.25887	8	-1.30937	8	-1.06816	8	-1.24528	8	-0.154754	8	0.030432	8	-0.727321
	9	-0.707316	9	-0.757817	9	-0.559081	9	-0.887444	9	-0.108712	9	-0.482544	9	-0.596826
	10	-0.723221	10	-0.731931	10	-0.599903	10	-0.782031	10	-0.465315	10	-1.00444	10	-0.70902
	11	-0.607465	11	-0.610725	11	-0.642385	11	-0.794417	11	-0.455407	11	-1.02104	11	-0.411202
	12	-0.655397	12	-0.646272	12	-0.411866	12	-0.842349	12	-0.04546	12	-0.644903	12	-0.864591
	13	-0.680619	13	-0.654898	13	-0.758555	13	-0.914506	13	-0.915064	13	-0.544107	13	-0.872022
	14	-0.156023	14	0.37096	14	0.298638	14	-0.966896	14	-1.18476	14	-0.708002	14	-1.45538
	15	-0.287135	15	0.210495	15	0.296161	15	-1.11584	15	-0.815775	15	-0.586279	15	-1.45538
	16	-0.828796	16	-0.403745	16	-0.47998	16	-1.58219	16	0.229239	16	0.465671	16	-1.26895
	17	-0.787005	17	-0.403745	17	-0.782255	17	-1.11039	17	0.515987	17	0.535755	17	-1.25248
	18	-0.068952	18	0.405713	18	-0.24059	18	-0.786203	18	0.509299	18	0.047426	18	-1.45265
	19	0.451807	19	1.03543	19	0.293893	19	-0.2714	19	0.964497	19	0.502624	19	-0.479273
	20	-0.116918	20	0.529307	20	0.150741	20	-1.10788	20	1.0613	20	0.110115	20	-0.612119
	21	-0.211535	21	-0.177103	21	-0.495129			21	0.977948	21	0.20304	21	-0.23835
					22	0.403896			22	0.652679	22	0.129248	22	-0.149596
									23	0.32521	23	-0.203671	23	0.52942
									24	-0.250343	24	-0.749818	24	1.2507
									25	-0.750933	25	-0.785364	25	1.12111
									26	-1.15056	26	-0.755713	26	0.506485
									27	-1.30768	27	-0.835923
									28	-1.95406	28	-1.48899
									29	-1.24639	29	-1.40401
									30	-1.08991	30	-1.27887
									31	-0.497762	31	-0.706535
									32	-0.497762	32	-0.73787
									33	-0.455972	33	-1.11991
									34	-0.343188	34	-1.01381
									35	-0.165646	35	-0.79255
									36	-0.611215	36	-0.576783
									37	-0.320138	37	-0.302303
									38	-0.730516	38	-0.725067
									39	-0.765659	39	-0.765659
									40	-0.765659	40	-0.765659
									41	-1.03742	41	-1.03742
									42	-0.859259	42	-0.859259
									43	-1.26303	43	-1.26303
									44	-2.41177	44	-2.41177
