# Supplementary material for: Cross-talk between individual phenol-soluble modulins in Staphylococcus aureus biofilm enables rapid and efficient amyloid formation
Source: eLife. 2020 Dec 1;9:e59776. doi: 10.7554/eLife.59776 (PMC7732344; doi:10.7554/eLife.59776)
Supplement: Figure 4—source data 1. [file elife-59776-fig4-data1.xlsx]

## Sheet: PSMa1
0.25 mg/mL PSMα1 monomers in the absence and presence of seeds of the other PSM peptides
Raw data												Averaged data
Time (h)	Unseeded	Unseeded	Unseeded	PSMα3 seeds	PSMα3 seeds	PSMα3 seeds	PSMβ1 seeds	PSMβ1 seeds	PSMβ2 seeds	PSMβ2 seeds	PSMβ2 seeds	Time (h)	Unseeded	PSMα3 seeds	PSMβ1 seeds	PSMβ2 seeds
0	134	135	138	186	176	185	928	957	1181	1359	1166	0	135.667	182.333	942.5	1235.33
0.166667	127	123	128	174	159	176	855	887	1134	1303	1073	0.166667	126	169.667	871	1170
0.333333	121	118	122	170	159	183	817	845	1139	1306	1369	0.333333	120.333	170.667	831	1271.33
0.5	115	117	119	172	152	177	827	862	1124	1292	1621	0.5	117	167	844.5	1345.67
0.666667	116	113	116	169	149	172	831	879	1099	1261	1700	0.666667	115	163.333	855	1353.33
0.833333	111	117	120	165	146	173	861	916	1087	1244	1741	0.833333	116	161.333	888.5	1357.33
1	113	115	112	166	146	172	878	940	1081	1253	1788	1	113.333	161.333	909	1374
1.16667	111	114	120	168	147	169	896	966	1082	1253	1797	1.16667	115	161.333	931	1377.33
1.33333	113	115	119	170	146	176	908	989	1082	1253	1828	1.33333	115.667	164	948.5	1387.67
1.5	111	109	114	171	147	174	940	1014	1082	1257	1849	1.5	111.333	164	977	1396
1.66667	111	113	117	170	147	176	960	1027	1083	1256	1859	1.66667	113.667	164.333	993.5	1399.33
1.83333	112	114	116	172	150	171	964	1037	1091	1266	1877	1.83333	114	164.333	1000.5	1411.33
2	112	114	117	174	148	178	978	1064	1088	1258	1882	2	114.333	166.667	1021	1409.33
2.16667	113	113	114	175	148	173	984	1075	1084	1259	1911	2.16667	113.333	165.333	1029.5	1418
2.33333	112	111	115	178	152	175	992	1096	1084	1256	1908	2.33333	112.667	168.333	1044	1416
2.5	113	114	114	173	145	183	1006	1099	1085	1265	1922	2.5	113.667	167	1052.5	1424
2.66667	110	110	113	178	147	179	1006	1126	1088	1267	1918	2.66667	111	168	1066	1424.33
2.83333	113	112	119	179	156	180	1010	1137	1094	1270	1936	2.83333	114.667	171.667	1073.5	1433.33
3	111	112	116	181	155	182	1021	1145	1093	1265	1935	3	113	172.667	1083	1431
3.16667	110	111	117	179	158	183	1033	1151	1085	1262	1935	3.16667	112.667	173.333	1092	1427.33
3.33333	108	111	113	182	156	185	1037	1170	1090	1264	1942	3.33333	110.667	174.333	1103.5	1432
3.5	112	113	115	183	160	188	1044	1173	1089	1270	1944	3.5	113.333	177	1108.5	1434.33
3.66667	111	109	116	191	163	190	1054	1183	1080	1268	1942	3.66667	112	181.333	1118.5	1430
3.83333	110	116	117	195	162	190	1063	1185	1092	1269	1948	3.83333	114.333	182.333	1124	1436.33
4	110	113	117	196	166	193	1062	1199	1085	1267	1947	4	113.333	185	1130.5	1433
4.16667	111	112	116	205	172	197	1061	1211	1082	1262	1957	4.16667	113	191.333	1136	1433.67
4.33333	109	113	111	213	174	204	1071	1223	1088	1268	1953	4.33333	111	197	1147	1436.33
4.5	108	112	116	216	175	210	1086	1232	1089	1272	1960	4.5	112	200.333	1159	1440.33
4.66667	112	109	117	232	181	217	1084	1242	1091	1277	1960	4.66667	112.667	210	1163	1442.67
4.83333	110	113	117	246	188	227	1091	1238	1083	1267	1965	4.83333	113.333	220.333	1164.5	1438.33
5	107	113	114	270	193	231	1100	1256	1082	1270	1962	5	111.333	231.333	1178	1438
5.16667	109	108	115	288	199	248	1099	1258	1094	1267	1970	5.16667	110.667	245	1178.5	1443.67
5.33333	110	110	113	309	205	264	1111	1281	1089	1269	1959	5.33333	111	259.333	1196	1439
5.5	112	111	115	334	214	280	1111	1274	1087	1270	1962	5.5	112.667	276	1192.5	1439.67
5.66667	110	113	114	372	229	300	1109	1290	1086	1268	1974	5.66667	112.333	300.333	1199.5	1442.67
5.83333	111	109	116	412	243	326	1130	1296	1092	1271	1972	5.83333	112	327	1213	1445
6	107	109	117	457	263	359	1122	1311	1090	1274	1984	6	111	359.667	1216.5	1449.33
6.16667	112	112	115	508	286	390	1137	1315	1095	1277	1974	6.16667	113	394.667	1226	1448.67
6.33333	110	114	115	575	310	445	1146	1329	1082	1273	1974	6.33333	113	443.333	1237.5	1443
6.5	110	113	114	650	346	497	1152	1328	1083	1274	1979	6.5	112.333	497.667	1240	1445.33
6.66667	111	111	112	741	376	561	1157	1348	1086	1274	1980	6.66667	111.333	559.333	1252.5	1446.67
6.83333	107	114	113	816	415	627	1166	1365	1093	1277	1987	6.83333	111.333	619.333	1265.5	1452.33
7	111	112	117	921	466	714	1173	1378	1093	1272	1991	7	113.333	700.333	1275.5	1452
7.16667	109	111	115	1037	512	798	1181	1385	1095	1278	1999	7.16667	111.667	782.333	1283	1457.33
7.33333	111	110	116	1153	566	892	1199	1392	1092	1286	1996	7.33333	112.333	870.333	1295.5	1458
7.5	111	111	115	1274	614	1002	1208	1411	1099	1281	1998	7.5	112.333	963.333	1309.5	1459.33
7.66667	111	113	115	1402	676	1114	1215	1427	1093	1287	2004	7.66667	113	1064	1321	1461.33
7.83333	107	110	114	1538	736	1240	1224	1461	1105	1288	2013	7.83333	110.333	1171.33	1342.5	1468.67
8	108	112	116	1670	802	1359	1228	1473	1105	1294	2015	8	112	1277	1350.5	1471.33
8.16667	107	109	114	1806	867	1498	1250	1497	1105	1303	2025	8.16667	110	1390.33	1373.5	1477.67
8.33333	112	114	115	1956	935	1633	1268	1523	1115	1306	2036	8.33333	113.667	1508	1395.5	1485.67
8.5	106	111	117	2094	999	1779	1287	1528	1119	1312	2050	8.5	111.333	1624	1407.5	1493.67
8.66667	110	112	112	2246	1077	1931	1289	1552	1123	1319	2044	8.66667	111.333	1751.33	1420.5	1495.33
8.83333	109	114	115	2379	1149	2079	1305	1587	1139	1322	2066	8.83333	112.667	1869	1446	1509
9	108	112	116	2539	1234	2248	1313	1591	1150	1342	2072	9	112	2007	1452	1521.33
9.16667	111	112	113	2690	1303	2410	1336	1638	1152	1350	2096	9.16667	112	2134.33	1487	1532.67
9.33333	110	112	114	2855	1384	2563	1343	1662	1173	1375	2100	9.33333	112	2267.33	1502.5	1549.33
9.5	112	113	115	3007	1467	2751	1384	1681	1203	1390	2125	9.5	113.333	2408.33	1532.5	1572.67
9.66667	112	113	113	3174	1568	2915	1396	1732	1234	1411	2153	9.66667	112.667	2552.33	1564	1599.33
9.83333	111	111	113	3335	1661	3088	1409	1779	1266	1449	2178	9.83333	111.667	2694.67	1594	1631
10	109	115	114	3502	1745	3271	1446	1818	1332	1475	2212	10	112.667	2839.33	1632	1673
10.1667	115	113	115	3689	1841	3454	1471	1850	1408	1516	2232	10.1667	114.333	2994.67	1660.5	1718.67
10.3333	112	111	113	3852	1940	3637	1502	1912	1496	1564	2298	10.3333	112	3143	1707	1786
10.5	113	111	112	3997	2044	3826	1536	1967	1618	1621	2357	10.5	112	3289	1751.5	1865.33
10.6667	115	114	118	4212	2152	4022	1553	2021	1764	1684	2434	10.6667	115.667	3462	1787	1960.67
10.8333	115	118	119	4384	2249	4209	1584	2094	1937	1768	2513	10.8333	117.333	3614	1839	2072.67
11	114	118	118	4542	2371	4407	1643	2157	2131	1875	2630	11	116.667	3773.33	1900	2212
11.1667	118	118	118	4743	2481	4612	1676	2237	2381	1996	2750	11.1667	118	3945.33	1956.5	2375.67
11.3333	116	115	122	4923	2599	4794	1724	2305	2695	2146	2894	11.3333	117.667	4105.33	2014.5	2578.33
11.5	118	120	122	5111	2732	4986	1801	2404	3064	2330	3064	11.5	120	4276.33	2102.5	2819.33
11.6667	120	120	125	5304	2853	5210	1844	2499	3451	2557	3241	11.6667	121.667	4455.67	2171.5	3083
11.8333	124	123	129	5502	2966	5412	1911	2630	3832	2832	3482	11.8333	125.333	4626.67	2270.5	3382
12	124	123	130	5676	3106	5644	2000	2736	4236	3143	3742	12	125.667	4808.67	2368	3707
12.1667	129	126	138	5878	3248	5841	2069	2848	4617	3475	4032	12.1667	131	4989	2458.5	4041.33
12.3333	130	126	137	6095	3380	6096	2144	2987	5104	3824	4366	12.3333	131	5190.33	2565.5	4431.33
12.5	131	129	141	6336	3515	6315	2211	3141	5636	4239	4765	12.5	133.667	5388.67	2676	4880
12.6667	132	134	148	6503	3641	6573	2309	3317	6336	4648	5166	12.6667	138	5572.33	2813	5383.33
12.8333	137	137	148	6728	3793	6823	2407	3447	6904	5106	5646	12.8333	140.667	5781.33	2927	5885.33
13	136	136	152	6925	3925	7076	2505	3678	7320	5718	6148	13	141.333	5975.33	3091.5	6395.33
13.1667	142	142	158	7177	4072	7370	2656	3831	7681	6392	6701	13.1667	147.333	6206.33	3243.5	6924.67
13.3333	143	144	164	7406	4218	7684	2757	4082	7999	6926	7293	13.3333	150.333	6436	3419.5	7406
13.5	147	151	169	7650	4368	7968	2899	4274	8317	7310	7889	13.5	155.667	6662	3586.5	7838.67
13.6667	152	153	176	7858	4519	8317	3029	4487	8597	7642	8542	13.6667	160.333	6898	3758	8260.33
13.8333	159	155	183	8153	4683	8629	3184	4672	8904	7899	9173	13.8333	165.667	7155	3928	8658.67
14	167	160	189	8424	4858	8962	3343	4940	9148	8248	9827	14	172	7414.67	4141.5	9074.33
14.1667	174	165	195	8677	5016	9293	3503	5192	9402	8537	10516	14.1667	178	7662	4347.5	9485
14.3333	178	168	201	8934	5173	9751	3673	5473	9697	8876	11169	14.3333	182.333	7952.67	4573	9914
14.5	186	176	204	9284	5337	10157	3843	5720	9940	9213	11736	14.5	188.667	8259.33	4781.5	10296.3
14.6667	197	182	215	9560	5523	10646	4068	6037	10220	9562	12362	14.6667	198	8576.33	5052.5	10714.7
14.8333	202	188	221	9885	5708	11081	4263	6285	10477	9931	12908	14.8333	203.667	8891.33	5274	11105.3
15	209	195	234	10210	5863	11547	4491	6593	10738	10304	13410	15	212.667	9206.67	5542	11484
15.1667	220	203	242	10594	6068	12136	4708	6902	11035	10684	13717	15.1667	221.667	9599.33	5805	11812
15.3333	229	218	253	10916	6267	12645	4941	7216	11315	11029	14046	15.3333	233.333	9942.67	6078.5	12130
15.5	242	230	267	11326	6451	13162	5198	7468	11583	11430	14216	15.5	246.333	10313	6333	12409.7
15.6667	251	246	275	11709	6646	13722	5414	7787	11865	11796	14454	15.6667	257.333	10692.3	6600.5	12705
15.8333	264	251	283	12121	6843	14304	5700	8088	12210	12170	14568	15.8333	266	11089.3	6894	12982.7
16	278	261	300	12547	7032	14844	5961	8492	12434	12471	14562	16	279.667	11474.3	7226.5	13155.7
16.1667	281	267	302	12951	7281	15428	6221	8802	12716	12764	14654	16.1667	283.333	11886.7	7511.5	13378
16.3333	289	276	311	13440	7471	16078	6520	9101	13009	13059	14641	16.3333	292	12329.7	7810.5	13569.7
16.5	299	285	332	13912	7682	16759	6775	9477	13253	13279	14654	16.5	305.333	12784.3	8126	13728.7
16.6667	307	292	335	14336	7854	17325	7095	9780	13498	13511	14793	16.6667	311.333	13171.7	8437.5	13934
16.8333	320	303	359	14821	8117	17920	7462	10150	13734	13597	14813	16.8333	327.333	13619.3	8806	14048
17	332	315	368	15303	8298	18608	7741	10516	13901	13751	14991	17	338.333	14069.7	9128.5	14214.3
17.1667	346	324	384	15799	8519	19195	8064	10852	14154	13784	15109	17.1667	351.333	14504.3	9458	14349
17.3333	356	334	392	16332	8756	19831	8415	11154	14338	13848	15208	17.3333	360.667	14973	9784.5	14464.7
17.5	374	339	407	16866	8994	20377	8720	11549	14413	13789	15324	17.5	373.333	15412.3	10134.5	14508.7
17.6667	386	356	423	17352	9241	20884	9024	11959	14557	13684	15367	17.6667	388.333	15825.7	10491.5	14536
17.8333	399	363	434	17850	9482	21482	9391	12222	14576	13609	15375	17.8333	398.667	16271.3	10806.5	14520
18	415	377	447	18277	9714	21909	9712	12623	14639	13520	15500	18	413	16633.3	11167.5	14553
18.1667	429	387	468	18740	9961	22440	10037	12884	14559	13379	15521	18.1667	428	17047	11460.5	14486.3
18.3333	445	395	480	19218	10257	22881	10382	13335	14596	13302	15557	18.3333	440	17452	11858.5	14485
18.5	461	405	496	19622	10521	23339	10778	13631	14496	13293	15591	18.5	454	17827.3	12204.5	14460
18.6667	474	419	510	20111	10763	23800	11055	13902	14424	13187	15626	18.6667	467.667	18224.7	12478.5	14412.3
18.8333	495	435	526	20550	11090	24264	11361	14276	14387	13142	15723	18.8333	485.333	18634.7	12818.5	14417.3
19	506	441	542	21008	11418	24741	11717	14638	14356	13237	15711	19	496.333	19055.7	13177.5	14434.7
19.1667	533	455	552	21379	11722	25078	12073	15009	14245	13225	15830	19.1667	513.333	19393	13541	14433.3
19.3333	550	468	568	21881	12073	25415	12362	15370	14227	13214	15887	19.3333	528.667	19789.7	13866	14442.7
19.5	569	480	591	22208	12402	25834	12773	15763	14259	13261	15920	19.5	546.667	20148	14268	14480
19.6667	589	502	603	22589	12675	26125	13099	16037	14300	13330	16039	19.6667	564.667	20463	14568	14556.3
19.8333	611	513	626	22943	12990	26439	13501	16385	14292	13406	16062	19.8333	583.333	20790.7	14943	14586.7
20	635	530	646	23305	13343	26835	13855	16724	14317	13440	16153	20	603.667	21161	15289.5	14636.7
20.1667	656	541	666	23722	13643	27062	14103	17075	14345	13485	16210	20.1667	621	21475.7	15589	14680
20.3333	681	558	689	24072	13974	27348	14555	17380	14344	13554	16282	20.3333	642.667	21798	15967.5	14726.7
20.5	705	578	721	24388	14245	27590	14904	17752	14460	13590	16297	20.5	668	22074.3	16328	14782.3
20.6667	726	590	744	24792	14611	27842	15232	18120	14487	13647	16346	20.6667	686.667	22415	16676	14826.7
20.8333	757	614	771	25130	14945	28143	15628	18467	14542	13661	16446	20.8333	714	22739.3	17047.5	14883
21	789	635	799	25501	15250	28333	15968	18761	14606	13713	16449	21	741	23028	17364.5	14922.7
21.1667	821	658	830	25777	15633	28663	16238	19076	14581	13769	16525	21.1667	769.667	23357.7	17657	14958.3
21.3333	847	682	857	26159	15911	28841	16658	19487	14654	13765	16579	21.3333	795.333	23637	18072.5	14999.3
21.5	883	704	893	26451	16296	28983	16956	19744	14678	13842	16578	21.5	826.667	23910	18350	15032.7
21.6667	913	726	925	26770	16592	29188	17268	20065	14791	13889	16624	21.6667	854.667	24183.3	18666.5	15101.3
21.8333	951	755	961	27107	16922	29367	17639	20314	14838	13921	16676	21.8333	889	24465.3	18976.5	15145
22	989	778	1001	27289	17309	29503	18038	20567	14880	13916	16736	22	922.667	24700.3	19302.5	15177.3
22.1667	1029	809	1045	27693	17646	29582	18265	21024	14887	13951	16818	22.1667	961	24973.7	19644.5	15218.7
22.3333	1067	838	1085	27944	18003	29630	18570	21285	14863	13952	16712	22.3333	996.667	25192.3	19927.5	15175.7
22.5	1119	869	1135	28186	18371	29727	18920	21539	14895	13994	16742	22.5	1041	25428	20229.5	15210.3
22.6667	1167	908	1178	28469	18721	29752	19215	21834	14963	14003	16791	22.6667	1084.33	25647.3	20524.5	15252.3
22.8333	1219	936	1231	28763	19164	29846	19523	22070	14958	13975	16779	22.8333	1128.67	25924.3	20796.5	15237.3
23	1261	974	1285	28882	19439	29908	19757	22377	15025	14060	16792	23	1173.33	26076.3	21067	15292.3
23.1667	1317	1007	1335	29159	19858	29885	20084	22655	15079	13995	16889	23.1667	1219.67	26300.7	21369.5	15321
23.3333	1367	1043	1392	29359	20183	29961	20398	22946	15057	14006	16800	23.3333	1267.33	26501	21672	15287.7
23.5	1422	1081	1451	29578	20543	29929	20785	23187	15091	14111	16924	23.5	1318	26683.3	21986	15375.3
23.6667	1472	1128	1510	29754	20992	29922	20995	23458	15024	14061	16875	23.6667	1370	26889.3	22226.5	15320
23.8333	1536	1173	1572	29986	21440	29901	21338	23764	15158	14037	16901	23.8333	1427	27109	22551	15365.3
24	1594	1205	1637	30140	21724	29837	21653	24011	15113	14070	16905	24	1478.67	27233.7	22832	15362.7
24.1667	1671	1256	1702	30175	22201	29787	21967	24311	15175	14066	16973	24.1667	1543	27387.7	23139	15404.7
24.3333	1733	1308	1763	30442	22588	29816	22190	24557	15173	14082	16965	24.3333	1601.33	27615.3	23373.5	15406.7
24.5	1800	1339	1838	30557	23030	29763	22442	24817	15241	14136	16868	24.5	1659	27783.3	23629.5	15415
24.6667	1852	1390	1909	30667	23411	29727	22652	25060	15177	14116	16951	24.6667	1717	27935	23856	15414.7
24.8333	1945	1434	1984	30812	23728	29625	22920	25311	15285	14153	16938	24.8333	1787.67	28055	24115.5	15458.7
25	2011	1485	2087	30865	24161	29629	23215	25622	15137	14095	16970	25	1861	28218.3	24418.5	15400.7
25.1667	2092	1535	2188	31021	24647	29492	23443	25926	15203	14129	16968	25.1667	1938.33	28386.7	24684.5	15433.3
25.3333	2169	1590	2304	30961	24878	29515	23651	26165	15258	14146	16957	25.3333	2021	28451.3	24908	15453.7
25.5	2245	1641	2439	31092	25180	29566	23891	26307	15301	14162	16958	25.5	2108.33	28612.7	25099	15473.7
25.6667	2318	1699	2590	31194	25677	29390	24104	26497	15264	14117	16954	25.6667	2202.33	28753.7	25300.5	15445
25.8333	2401	1757	2728	31155	25967	29410	24436	26845	15270	14177	17034	25.8333	2295.33	28844	25640.5	15493.7
26	2482	1801	2899	31067	26279	29257	24591	26980	15368	14227	17002	26	2394	28867.7	25785.5	15532.3
26.1667	2561	1874	3040	31158	26533	29253	24679	27202	15340	14217	16991	26.1667	2491.67	28981.3	25940.5	15516
26.3333	2650	1919	3206	31190	26898	29183	24995	27410	15347	14228	16987	26.3333	2591.67	29090.3	26202.5	15520.7
26.5	2736	1981	3350	31066	27227	29122	25188	27507	15305	14224	16997	26.5	2689	29138.3	26347.5	15508.7
26.6667	2834	2035	3495	31069	27511	28976	25532	27796	15366	14209	17020	26.6667	2788	29185.3	26664	15531.7
26.8333	2912	2103	3641	30972	27964	28908	25620	27936	15347	14240	17026	26.8333	2885.33	29281.3	26778	15537.7
27	2999	2163	3809	30994	28175	29054	25862	28111	15384	14243	17018	27	2990.33	29407.7	26986.5	15548.3
27.1667	3097	2229	3942	30810	28485	28844	25961	28229	15431	14212	17072	27.1667	3089.33	29379.7	27095	15571.7
27.3333	3193	2289	4069	30627	28502	28904	26271	28416	15355	14248	16997	27.3333	3183.67	29344.3	27343.5	15533.3
27.5	3298	2361	4229	30671	28917	28798	26400	28511	15444	14272	17006	27.5	3296	29462	27455.5	15574
27.6667	3410	2409	4371	30542	29114	28885	26646	28633	15449	14275	16996	27.6667	3396.67	29513.7	27639.5	15573.3
27.8333	3506	2502	4485	30321	29391	28639	26785	28704	15480	14237	17012	27.8333	3497.67	29450.3	27744.5	15576.3
28	3618	2563	4599	30171	29643	28613	26856	28896	15494	14247	17053	28	3593.33	29475.7	27876	15598
28.1667	3722	2624	4676	30257	29804	28547	27052	28916	15485	14270	17010	28.1667	3674	29536	27984	15588.3
28.3333	3819	2689	4754	30162	29906	28489	27180	28909	15438	14322	17075	28.3333	3754	29519	28044.5	15611.7
28.5	3904	2765	4794	30011	30162	28528	27291	29029	15482	14298	17031	28.5	3821	29567	28160	15603.7
28.6667	4005	2844	4844	29833	30111	28436	27412	29053	15510	14303	17028	28.6667	3897.67	29460	28232.5	15613.7
28.8333	4088	2924	4888	29800	30256	28320	27452	29141	15550	14315	17067	28.8333	3966.67	29458.7	28296.5	15644
29	4146	3010	4931	29648	30389	28317	27697	29314	15535	14303	17032	29	4029	29451.3	28505.5	15623.3
29.1667	4220	3104	5023	29531	30576	28198	27685	29306				29.1667	4115.67	29435	28495.5
29.3333	4293	3182	5060	29453	30594	28213	27769	29394				29.3333	4178.33	29420	28581.5
29.5	4375	3296	5167	29398	30564	28162	27887	29538				29.5	4279.33	29374.7	28712.5
29.6667	4444	3382	5254	29282	30815	28201	27935	29531				29.6667	4360	29432.7	28733
29.8333	4554	3483	5317	29238	30812	28167	28096	29642				29.8333	4451.33	29405.7	28869
30	4637	3631	5429	29168	30957	28073	28094	29691				30	4565.67	29399.3	28892.5
30.1667	4721	3717	5529	29112	30993	28093	28253	29746				30.1667	4655.67	29399.3	28999.5
30.3333	4824	3829	5642	29047	30953	28033	28236	29966				30.3333	4765	29344.3	29101
30.5	4903	3945	5780	29123	31002	28091	28345	29910				30.5	4876	29405.3	29127.5
30.6667	4992	4032	5912	28924	30948	28039	28472	29967				30.6667	4978.67	29303.7	29219.5
30.8333	5086	4154	6064	28903	30956	28062	28415	30238				30.8333	5101.33	29307	29326.5
31	5201	4249	6272	28846	30995	28103	28539	30339				31	5240.67	29314.7	29439
31.1667	5294	4335	6406	28813	31009	28003	28506	30379				31.1667	5345	29275	29442.5
31.3333	5404	4437	6554	28735	30925	27995	28534	30614				31.3333	5465	29218.3	29574
31.5	5498	4541	6700	28686	30915	27986	28521	30629				31.5	5579.67	29195.7	29575
31.6667	5587	4605	6843	28726	30896	28036	28541	30812				31.6667	5678.33	29219.3	29676.5
31.8333	5685	4741	6978	28695	30902	28048	28372	30855				31.8333	5801.33	29215	29613.5
32	5797	4840	7153	28741	30912	27965	28230	31233				32	5930	29206	29731.5
32.1667	5898	4909	7232	28754	30941	28108						32.1667	6013	29267.7
32.3333	5999	4987	7377									32.3333	6121
32.5	6114	5095	7468									32.5	6225.67
32.6667	6248	5212	7604									32.6667	6354.67
32.8333	6382	5274	7685									32.8333	6447
33	6562	5355	7785									33	6567.33
33.1667	6731	5456	7929									33.1667	6705.33
33.3333	6938	5550	8007									33.3333	6831.67
33.5	7106	5640	8162									33.5	6969.33
33.6667	7328	5724	8288									33.6667	7113.33
33.8333	7530	5813	8414									33.8333	7252.33
34	7703	5943	8512									34	7386
34.1667	7951	6024	8641									34.1667	7538.67
34.3333	8185	6134	8754									34.3333	7691
34.5	8341	6206	8871									34.5	7806
34.6667	8576	6337	8999									34.6667	7970.67
34.8333	8724	6452	9094									34.8333	8090
35	8869	6570	9240									35	8226.33
35.1667	9008	6677	9322									35.1667	8335.67
35.3333	9189	6779	9399									35.3333	8455.67
35.5	9290	6894	9523									35.5	8569
35.6667	9443	7026	9612									35.6667	8693.67
35.8333	9570	7149	9690									35.8333	8803
36	9627	7247	9754									36	8876
36.1667	9814	7406	9897									36.1667	9039
36.3333	9979	7544	9943									36.3333	9155.33
36.5	10092	7621	10016									36.5	9243
36.6667	10279	7791	10144									36.6667	9404.67
36.8333	10408	7955	10227									36.8333	9530
37	10571	8050	10302									37	9641
37.1667	10676	8211	10372									37.1667	9753
37.3333	10788	8410	10442									37.3333	9880
37.5	10931	8575	10548									37.5	10018
37.6667	11111	8788	10641									37.6667	10180
37.8333	11200	9018	10711									37.8333	10309.7
38	11337	9184	10810									38	10443.7
38.1667	11423	9381	10864									38.1667	10556
38.3333	11494	9565	10935									38.3333	10664.7
38.5	11589	9791	11042									38.5	10807.3
38.6667	11702	9989	11071									38.6667	10920.7
38.8333	11839	10215	11137									38.8333	11063.7
39	11894	10353	11163									39	11136.7
39.1667	11996	10492	11271									39.1667	11253
39.3333	12020	10633	11320									39.3333	11324.3
39.5	12188	10769	11391									39.5	11449.3
39.6667	12231	10841	11453									39.6667	11508.3
39.8333	12291	10988	11493									39.8333	11590.7
40	12399	11079	11579									40	11685.7
40.1667	12458	11201	11594									40.1667	11751
40.3333	12549	11314	11645									40.3333	11836
40.5	12553	11466	11721									40.5	11913.3
40.6667	12649	11528	11823									40.6667	12000
40.8333	12695	11626	11857									40.8333	12059.3
41	12738	11729	11915									41	12127.3
41.1667	12804	11888	11959									41.1667	12217
41.3333	12907	11963	12006									41.3333	12292
41.5	12939	12044	12088									41.5	12357
41.6667	13021	12157	12136									41.6667	12438
41.8333	13065	12224	12223									41.8333	12504
42	13107	12316	12310									42	12577.7
42.1667	13159	12402	12334									42.1667	12631.7
42.3333	13228	12497	12415									42.3333	12713.3
42.5	13244	12564	12494									42.5	12767.3
42.6667	13301	12693	12549									42.6667	12847.7
42.8333	13323	12678	12588									42.8333	12863
43	13369	12801	12679									43	12949.7
43.1667	13386	12848	12742									43.1667	12992
43.3333	13433	12890	12792									43.3333	13038.3
43.5	13444	12979	12846									43.5	13089.7
43.6667	13515	13046	12883									43.6667	13148
43.8333	13510	13050	12939									43.8333	13166.3
44	13547	13173	13037									44	13252.3
44.1667	13594	13238	13105									44.1667	13312.3
44.3333	13672	13268	13078									44.3333	13339.3
44.5	13649	13301	13160									44.5	13370
44.6667	13730	13344	13215									44.6667	13429.7
44.8333	13769	13412	13300									44.8333	13493.7
45	13832	13439	13303									45	13524.7
45.1667	13829	13526	13384									45.1667	13579.7
45.3333	13809	13590	13477									45.3333	13625.3
45.5	13871	13627	13543									45.5	13680.3
45.6667	13921	13665	13594									45.6667	13726.7
45.8333	14008	13715	13600									45.8333	13774.3
46	14038	13733	13699									46	13823.3
46.1667	14016	13781	13734									46.1667	13843.7
46.3333	14061	13801	13822									46.3333	13894.7
46.5	14143	13869	13818									46.5	13943.3
46.6667	14130	13943	13909									46.6667	13994
46.8333	14191	13969	13952									46.8333	14037.3
47	14214	13977	13995									47	14062
47.1667	14167	14010	14035									47.1667	14070.7
47.3333	14264	14048	14123									47.3333	14145
47.5	14249	14086	14152									47.5	14162.3
47.6667	14283	14168	14194									47.6667	14215
47.8333	14325	14144	14228									47.8333	14232.3
48	14336	14138	14248									48	14240.7
48.1667	14352	14210	14303									48.1667	14288.3
48.3333	14354	14199	14318									48.3333	14290.3
48.5	14428	14238	14388									48.5	14351.3
48.6667	14415	14263	14397									48.6667	14358.3
48.8333	14446	14294	14429									48.8333	14389.7
49	14483	14301	14481									49	14421.7
49.1667	14457	14338	14442									49.1667	14412.3
49.3333	14489	14328	14482									49.3333	14433
49.5	14566	14407	14537									49.5	14503.3
49.6667	14565	14355	14557									49.6667	14492.3
49.8333	14554	14387	14533									49.8333	14491.3
50	14603	14394	14621									50	14539.3
50.1667	14656	14413	14648									50.1667	14572.3
50.3333	14637	14484	14649									50.3333	14590
50.5	14666	14492	14668									50.5	14608.7
50.6667	14742	14505	14740									50.6667	14662.3
50.8333	14677	14575	14769									50.8333	14673.7
51	14719	14585	14745									51	14683
51.1667	14752	14564	14803									51.1667	14706.3
51.3333	14750	14616	14860									51.3333	14742
51.5	14831	14591	14893									51.5	14771.7
51.6667	14820	14606	14866									51.6667	14764
51.8333	14807	14689	14938									51.8333	14811.3
52	14827	14687	14946									52	14820
52.1667	14807	14689	14974									52.1667	14823.3
52.3333	14861	14742	14960									52.3333	14854.3
52.5	14876	14702	14967									52.5	14848.3
52.6667	14854	14725	15015									52.6667	14864.7
52.8333	14898	14771	15038									52.8333	14902.3
53	14896	14816	15050									53	14920.7
53.1667	14964	14849	15035									53.1667	14949.3
53.3333	14944	14827	15086									53.3333	14952.3
53.5	14990	14804	15106									53.5	14966.7
53.6667	15002	14809	15176									53.6667	14995.7
53.8333	15035	14879	15129									53.8333	15014.3
54	14989	14827	15129									54	14981.7
54.1667	14988	14906	15140									54.1667	15011.3
54.3333	15075	14871	15164									54.3333	15036.7
54.5	15078	14864	15239									54.5	15060.3
54.6667	15073	14896	15268									54.6667	15079
54.8333	15116	14953	15255									54.8333	15108
55	15091	14915	15293									55	15099.7
55.1667	15050	14914	15347									55.1667	15103.7
55.3333	15100	14921	15342									55.3333	15121
55.5	15190	14959	15289									55.5	15146
55.6667	15107	15012	15389									55.6667	15169.3
55.8333	15102	14944	15389									55.8333	15145
56	15189	14990	15417									56	15198.7
56.1667	15147	14957	15367									56.1667	15157
56.3333	15199	15000	15404									56.3333	15201
56.5	15147	15072	15432									56.5	15217
56.6667	15147	14971	15489									56.6667	15202.3
56.8333	15178	15047	15469									56.8333	15231.3
57	15190	15023	15489									57	15234
57.1667	15252	15050	15522									57.1667	15274.7
57.3333	15268	15045	15521									57.3333	15278
57.5	15295	15087	15504									57.5	15295.3
57.6667	15266	15076	15471									57.6667	15271
57.8333	15282	15077	15479									57.8333	15279.3
58	15286	15073	15625									58	15328
58.1667	15277	15090	15553									58.1667	15306.7
58.3333	15314	15107	15546									58.3333	15322.3
58.5	15267	15119	15604									58.5	15330
58.6667	15358	15120	15605									58.6667	15361
58.8333	15408	15129	15658									58.8333	15398.3
59	15325	15171	15582									59	15359.3
59.1667	15391	15172	15670									59.1667	15411
59.3333	15290	15099	15588									59.3333	15325.7
59.5	15278	15110	15671									59.5	15353
59.6667	15371	15179	15667									59.6667	15405.7
59.8333	15375	15221	15675									59.8333	15423.7
60	15344	15173	15655									60	15390.7
60.1667	15381	15217	15713									60.1667	15437
60.3333	15373	15248	15660									60.3333	15427
60.5	15393	15220	15712									60.5	15441.7
60.6667	15383	15268	15712									60.6667	15454.3
60.8333	15448	15275	15782									60.8333	15501.7
61	15461	15205	15737									61	15467.7
61.1667	15427	15283	15800									61.1667	15503.3
61.3333	15407	15287	15791									61.3333	15495
61.5	15474	15277	15765									61.5	15505.3
61.6667	15456	15329	15803									61.6667	15529.3
61.8333	15447	15273	15743									61.8333	15487.7
62	15444	15297	15827									62	15522.7
62.1667	15461	15332	15800									62.1667	15531
62.3333	15494	15351	15822									62.3333	15555.7
62.5	15480	15374	15811									62.5	15555
62.6667	15530	15341	15813									62.6667	15561.3
62.8333	15520	15359	15820									62.8333	15566.3
63	15495	15366	15797									63	15552.7
63.1667	15537	15377	15839									63.1667	15584.3
63.3333	15559	15454	15783									63.3333	15598.7
63.5	15509	15377	15890									63.5	15592
63.6667	15556	15428	15862									63.6667	15615.3
63.8333	15619	15400	15839									63.8333	15619.3
64	15545	15422	15913									64	15626.7
64.1667	15556	15440	15899									64.1667	15631.7
64.3333	15566	15401	15873									64.3333	15613.3
64.5	15563	15403	15961									64.5	15642.3
64.6667	15654	15405	15924									64.6667	15661
64.8333	15606	15451	15932									64.8333	15663
65	15614	15418	15928									65	15653.3
65.1667	15574	15406	15916									65.1667	15632
65.3333	15639	15451	15901									65.3333	15663.7
65.5	15670	15470	15981									65.5	15707
65.6667	15647	15452	15916									65.6667	15671.7
65.8333	15647	15416	15949									65.8333	15670.7
66	15603	15509	15930									66	15680.7
66.1667	15690	15495	15965									66.1667	15716.7
66.3333	15652	15450	15902									66.3333	15668
66.5	15672	15465	15952									66.5	15696.3
66.6667	15641	15427	15960									66.6667	15676
66.8333	15704	15483	15972									66.8333	15719.7
67	15642	15467	15962									67	15690.3
67.1667	15692	15463	16045									67.1667	15733.3
67.3333	15722	15539	16036									67.3333	15765.7
67.5	15669	15517	16015									67.5	15733.7
67.6667	15700	15502	15952									67.6667	15718
67.8333	15730	15480	16017									67.8333	15742.3
68	15661	15533	16001									68	15731.7
68.1667	15701	15497	16001									68.1667	15733
68.3333	15765	15564	15992									68.3333	15773.7
68.5	15785	15507	15967									68.5	15753
68.6667	15739	15498	16007									68.6667	15748
68.8333	15801	15494	16015									68.8333	15770
69	15800	15521	16003									69	15774.7
69.1667	15748	15499	16035									69.1667	15760.7
69.3333	15758	15535	16023									69.3333	15772
69.5	15800	15540	16001									69.5	15780.3
69.6667	15741	15535	15997									69.6667	15757.7
69.8333	15781	15536	15982									69.8333	15766.3
70	15834	15538	15966									70	15779.3
70.1667	15780	15501	15983									70.1667	15754.7
70.3333	15764	15536	15997									70.3333	15765.7
70.5	15765	15573	16004									70.5	15780.7
70.6667	15808	15542	16053									70.6667	15801
70.8333	15834	15504	16011									70.8333	15783
71	15748	15543	16043									71	15778
71.1667	15837	15561	16063									71.1667	15820.3
71.3333	15787	15550	15985									71.3333	15774
71.5	15790	15550	16048									71.5	15796
71.6667	15778	15585	16061									71.6667	15808
71.8333	15741	15561	16071									71.8333	15791
72	15803	15569	16004									72	15792
72.1667	15809	15584	16038									72.1667	15810.3
72.3333	15816	15577	16081									72.3333	15824.7
72.5	15802	15590	16068									72.5	15820
72.6667	15798	15603	16050									72.6667	15817
72.8333	15832	15609	16050									72.8333	15830.3
73	15898	15510	16054									73	15820.7
73.1667	15844	15628	16064									73.1667	15845.3
73.3333	15806	15595	16128									73.3333	15843
73.5	15872	15588	15984									73.5	15814.7
73.6667	15859	15607	16087									73.6667	15851
73.8333	15828	15616	16015									73.8333	15819.7
74	15844	15576	16021									74	15813.7
74.1667	15899	15595	16109									74.1667	15867.7
74.3333	15850	15587	16075									74.3333	15837.3
74.5	15844	15531	16090									74.5	15821.7
74.6667	15888	15574	16062									74.6667	15841.3
74.8333	15797	15503	16019									74.8333	15773
75	15882	15566	16124									75	15857.3
75.1667	15833	15552	16058									75.1667	15814.3
75.3333	15874	15580	16096									75.3333	15850
75.5	15868	15639	16113									75.5	15873.3
75.6667	15823	15599	16109									75.6667	15843.7
75.8333	15905	15606	16105									75.8333	15872
76	15913	15626	16114									76	15884.3
76.1667	15874	15653	16068									76.1667	15865
76.3333	15851	15604	16129									76.3333	15861.3
76.5	15882	15561	16059									76.5	15834
76.6667	15850	15640	16102									76.6667	15864
76.8333	15930	15599	16153									76.8333	15894
77	15868	15648	16132									77	15882.7
77.1667	15916	15619	16155									77.1667	15896.7
77.3333	15913	15615	16155									77.3333	15894.3
77.5	15917	15545	16102									77.5	15854.7
77.6667	15941	15591	16162									77.6667	15898
77.8333	15913	15622	16096									77.8333	15877
78	15936	15648	16178									78	15920.7
78.1667	15901	15597	16119									78.1667	15872.3
78.3333	15948	15627	16134									78.3333	15903
78.5	15918	15631	16154									78.5	15901
78.6667	15929	15655	16168									78.6667	15917.3
78.8333	15909	15710	16164									78.8333	15927.7
79	15955	15626	16126									79	15902.3
79.1667	15958	15642	16138									79.1667	15912.7
79.3333	15923	15611	16111									79.3333	15881.7
79.5	15878	15588	16165									79.5	15877
79.6667	15962	15612	16181									79.6667	15918.3
79.8333	15920	15638	16154									79.8333	15904
80	15917	15620	16170									80	15902.3
80.1667	15896	15627	16079									80.1667	15867.3
80.3333	15904	15613	16138									80.3333	15885
80.5	15954	15619	16057									80.5	15876.7
80.6667	15930	15699	16100									80.6667	15909.7
80.8333	15885	15613	16207									80.8333	15901.7
81	15903	15534	16136									81	15857.7
81.1667	15915	15643	16126									81.1667	15894.7
81.3333	15922	15651	16109									81.3333	15894
81.5	15967	15632	16143									81.5	15914
81.6667	15995	15616	16147									81.6667	15919.3
81.8333	15930	15636	16182									81.8333	15916
82	15890	15656	16139									82	15895
82.1667	15963	15578	16097									82.1667	15879.3
82.3333	16005	15663	16150									82.3333	15939.3
82.5	15944	15628	16127									82.5	15899.7
82.6667	16001	15636	16166									82.6667	15934.3
82.8333	15978	15593	16121									82.8333	15897.3
83	15911	15552	16122									83	15861.7
83.1667	15957	15663	16170									83.1667	15930
83.3333	15974	15672	16128									83.3333	15924.7
83.5	15980	15676	16117									83.5	15924.3
83.6667	15962	15593	16090									83.6667	15881.7
83.8333	15937	15653	16121									83.8333	15903.7
84	15991	15620	16050									84	15887
84.1667	15984	15631	16190									84.1667	15935
84.3333	15930	15579	16087									84.3333	15865.3
84.5	16013	15592	16123									84.5	15909.3
84.6667	15931	15648	16104									84.6667	15894.3
84.8333	15923	15655	16203									84.8333	15927
85	15970	15622	16101									85	15897.7
85.1667	15993	15657	16134									85.1667	15928
85.3333	15922	15660	16183									85.3333	15921.7
85.5	15989	15622	16130									85.5	15913.7
85.6667	15963	15675	16198									85.6667	15945.3
85.8333	16006	15629	16141									85.8333	15925.3
86	16027	15607	16179									86	15937.7
86.1667	15968	15631	16160									86.1667	15919.7
86.3333	16026	15598	16209									86.3333	15944.3
86.5	15983	15643	16145									86.5	15923.7
86.6667	16030	15622	16196									86.6667	15949.3
86.8333	15993	15688	16175									86.8333	15952
87	16021	15591	16145									87	15919
87.1667	16024	15630	16205									87.1667	15953
87.3333	16013	15588	16214									87.3333	15938.3
87.5	15972	15616	16157									87.5	15915
87.6667	16033	15669	16162									87.6667	15954.7
87.8333	16034	15673	16186									87.8333	15964.3
88	15983	15707	16188									88	15959.3
88.1667	16025	15657	16221									88.1667	15967.7
88.3333	16080	15672	16125									88.3333	15959
88.5	16024	15634	16211									88.5	15956.3
88.6667	15986	15627	16170									88.6667	15927.7
88.8333	16010	15630	16197									88.8333	15945.7
89	16033	15676	16166									89	15958.3
89.1667	15992	15653	16216									89.1667	15953.7
89.3333	16011	15655	16207									89.3333	15957.7
89.5	16056	15684	16225									89.5	15988.3
89.6667	16103	15721	16220									89.6667	16014.7
89.8333	16031	15672	16225									89.8333	15976
90	16070	15619	16223									90	15970.7
90.1667	16003	15637	16237									90.1667	15959
90.3333	16074	15714	16217									90.3333	16001.7
90.5	16045	15621	16212									90.5	15959.3
90.6667	16075	15683	16200									90.6667	15986
90.8333	16037	15639	16215									90.8333	15963.7
91	16056	15649	16285									91	15996.7
91.1667	16057	15699	16198									91.1667	15984.7
91.3333	16109	15673	16234									91.3333	16005.3
91.5	16118	15671	16241									91.5	16010
91.6667	16091	15738	16208									91.6667	16012.3
91.8333	16186	15664	16277									91.8333	16042.3
92	16105	15700	16255									92	16020
92.1667	16063	15719	16248									92.1667	16010
92.3333	16144	15641	16255									92.3333	16013.3
92.5	16134	15695	16225									92.5	16018
92.6667	16156	15671	16227									92.6667	16018
92.8333	16101	15707	16240									92.8333	16016
93	16130	15672	16268									93	16023.3
93.1667	16129	15727	16268									93.1667	16041.3
93.3333	16133	15679	16267									93.3333	16026.3
93.5	16147	15660	16242									93.5	16016.3
93.6667	16160	15757	16281									93.6667	16066
93.8333	16151	15733	16234									93.8333	16039.3
94	16137	15685	16192									94	16004.7
94.1667	16171	15721	16266									94.1667	16052.7
94.3333	16212	15720	16300									94.3333	16077.3
94.5	16134	15704	16314									94.5	16050.7
94.6667	16124	15705	16279									94.6667	16036
94.8333	16164	15758	16252									94.8333	16058
95	16195	15688	16328									95	16070.3
95.1667	16168	15727	16309									95.1667	16068
95.3333	16208	15745	16254									95.3333	16069
95.5	16157	15728	16331									95.5	16072
95.6667	16195	15714	16290									95.6667	16066.3
95.8333	16165	15776	16287									95.8333	16076
96	16145	15702	16322									96	16056.3
96.1667	16247	15712	16273									96.1667	16077.3
96.3333	16196	15716	16331									96.3333	16081

## Sheet: PSMa2
0.25 mg/mL PSMα2 monomers in the absence and presence of seeds of the other PSM peptides
Raw data																Average data
Time (h)	Unseeded	Unseeded	Unseeded	PSMα1 seeds	PSMα1 seeds	PSMα1 seeds	PSMα3 seeds	PSMα3 seeds	PSMα3 seeds	PSMβ1 seeds	PSMβ1 seeds	PSMβ1 seeds	PSMβ2 seeds	PSMβ2 seeds	PSMβ2 seeds	Time (h)	Unseeded	PSMα1 seeds	PSMα3 seeds	PSMβ1 seeds	PSMβ2 seeds
0	109	133	127	541	648	712	186	198	232	1114	1159	1128	2032	1463	1314	0	123	633.667	205.333	1133.67	1603
0.166667	105	122	121	757	888	902	175	192	223	1083	1127	1090	1792	1373	1325	0.166667	116	849	196.667	1100	1496.67
0.333333	101	115	115	849	940	938	178	193	218	1130	1202	1115	1760	1395	1328	0.333333	110.333	909	196.333	1149	1494.33
0.5	96	115	118	937	993	1004	175	193	218	1331	1365	1275	1739	1391	1330	0.5	109.667	978	195.333	1323.67	1486.67
0.666667	94	115	111	1026	1055	1065	182	197	222	1552	1660	1492	1744	1396	1326	0.666667	106.667	1048.67	200.333	1568	1488.67
0.833333	99	111	114	1104	1125	1121	182	197	226	1731	1805	1745	1749	1400	1337	0.833333	108	1116.67	201.667	1760.33	1495.33
1	97	116	112	1187	1184	1171	189	200	229	1846	1930	1866	1750	1415	1344	1	108.333	1180.67	206	1880.67	1503
1.16667	95	114	111	1246	1229	1222	194	201	235	1966	2058	1988	1764	1419	1352	1.16667	106.667	1232.33	210	2004	1511.67
1.33333	99	114	109	1311	1275	1273	198	206	238	2056	2139	2046	1778	1437	1359	1.33333	107.333	1286.33	214	2080.33	1524.67
1.5	100	114	110	1363	1314	1306	204	211	244	2121	2206	2125	1788	1444	1371	1.5	108	1327.67	219.667	2150.67	1534.33
1.66667	99	117	110	1418	1348	1355	208	219	256	2168	2267	2194	1804	1455	1381	1.66667	108.667	1373.67	227.667	2209.67	1546.67
1.83333	98	111	111	1472	1393	1386	211	224	259	2235	2302	2239	1813	1461	1382	1.83333	106.667	1417	231.333	2258.67	1552
2	101	113	115	1516	1435	1435	213	233	262	2288	2329	2307	1828	1467	1395	2	109.667	1462	236	2308	1563.33
2.16667	96	110	112	1556	1470	1461	221	242	268	2335	2377	2350	1828	1480	1401	2.16667	106	1495.67	243.667	2354	1569.67
2.33333	102	114	111	1581	1499	1486	221	249	276	2358	2392	2378	1835	1489	1397	2.33333	109	1522	248.667	2376	1573.67
2.5	102	110	114	1623	1529	1514	227	247	276	2397	2403	2396	1846	1499	1407	2.5	108.667	1555.33	250	2398.67	1584
2.66667	99	114	113	1653	1551	1539	232	251	277	2412	2434	2433	1847	1500	1405	2.66667	108.667	1581	253.333	2426.33	1584
2.83333	96	112	110	1669	1569	1551	239	259	280	2453	2456	2445	1868	1500	1413	2.83333	106	1596.33	259.333	2451.33	1593.67
3	95	116	117	1698	1578	1569	238	260	283	2476	2471	2480	1865	1505	1416	3	109.333	1615	260.333	2475.67	1595.33
3.16667	101	116	114	1710	1595	1581	244	262	288	2478	2503	2498	1866	1512	1428	3.16667	110.333	1628.67	264.667	2493	1602
3.33333	99	118	114	1724	1619	1587	242	261	286	2495	2494	2503	1882	1506	1420	3.33333	110.333	1643.33	263	2497.33	1602.67
3.5	98	111	114	1737	1627	1610	247	266	287	2531	2538	2528	1882	1510	1428	3.5	107.667	1658	266.667	2532.33	1606.67
3.66667	99	112	115	1738	1632	1610	249	270	288	2545	2551	2558	1877	1520	1428	3.66667	108.667	1660	269	2551.33	1608.33
3.83333	101	110	115	1751	1637	1608	251	266	291	2565	2576	2554	1880	1526	1433	3.83333	108.667	1665.33	269.333	2565	1613
4	100	113	116	1747	1634	1625	251	270	294	2561	2595	2588	1889	1528	1440	4	109.667	1668.67	271.667	2581.33	1619
4.16667	102	113	122	1745	1639	1628	252	266	291	2600	2622	2585	1892	1526	1443	4.16667	112.333	1670.67	269.667	2602.33	1620.33
4.33333	99	112	115	1738	1644	1625	251	267	290	2592	2625	2602	1889	1527	1444	4.33333	108.667	1669	269.333	2606.33	1620
4.5	99	115	118	1728	1641	1636	255	265	297	2618	2651	2639	1895	1539	1452	4.5	110.667	1668.33	272.333	2636	1628.67
4.66667	101	115	116	1729	1639	1637	255	266	295	2623	2684	2623	1906	1544	1442	4.66667	110.667	1668.33	272	2643.33	1630.67
4.83333	97	113	119	1723	1643	1638	254	272	298	2640	2686	2635	1909	1539	1446	4.83333	109.667	1668	274.667	2653.67	1631.33
5	98	110	116	1730	1638	1642	256	271	293	2655	2711	2644	1915	1550	1452	5	108	1670	273.333	2670	1639
5.16667	99	114	117	1731	1645	1652	259	266	298	2678	2680	2671	1922	1545	1452	5.16667	110	1676	274.333	2676.33	1639.67
5.33333	99	114	117	1743	1657	1642	254	265	298	2681	2739	2680	1917	1551	1460	5.33333	110	1680.67	272.333	2700	1642.67
5.5	103	111	119	1741	1644	1650	257	268	303	2694	2768	2690	1926	1556	1455	5.5	111	1678.33	276	2717.33	1645.67
5.66667	97	110	117	1743	1640	1669	254	270	297	2707	2768	2701	1931	1554	1461	5.66667	108	1684	273.667	2725.33	1648.67
5.83333	99	113	116	1735	1653	1663	260	267	299	2717	2807	2745	1930	1563	1470	5.83333	109.333	1683.67	275.333	2756.33	1654.33
6	100	111	115	1745	1655	1653	262	267	298	2715	2798	2729	1936	1562	1465	6	108.667	1684.33	275.667	2747.33	1654.33
6.16667	98	112	116	1747	1658	1663	258	265	298	2744	2820	2744	1933	1561	1473	6.16667	108.667	1689.33	273.667	2769.33	1655.67
6.33333	100	112	116	1756	1652	1664	262	264	300	2737	2829	2752	1948	1565	1467	6.33333	109.333	1690.67	275.333	2772.67	1660
6.5	104	113	117	1763	1672	1661	263	270	300	2749	2869	2776	1945	1564	1471	6.5	111.333	1698.67	277.667	2798	1660
6.66667	100	109	117	1765	1662	1655	260	267	299	2755	2871	2763	1953	1576	1474	6.66667	108.667	1694	275.333	2796.33	1667.67
6.83333	98	113	119	1759	1666	1669	261	267	302	2791	2885	2777	1958	1569	1480	6.83333	110	1698	276.667	2817.67	1669
7	101	112	120	1762	1669	1665	256	267	298	2788	2891	2793	1961	1573	1480	7	111	1698.67	273.667	2824	1671.33
7.16667	99	113	123	1762	1673	1682	261	265	298	2805	2930	2793	1958	1574	1481	7.16667	111.667	1705.67	274.667	2842.67	1671
7.33333	99	110	116	1762	1670	1679	257	271	300	2796	2942	2809	1965	1579	1483	7.33333	108.333	1703.67	276	2849	1675.67
7.5	100	113	120	1763	1672	1677	257	270	302	2830	2956	2807	1980	1578	1484	7.5	111	1704	276.333	2864.33	1680.67
7.66667	98	112	119	1773	1676	1675	259	266	301	2839	2966	2828	1971	1575	1485	7.66667	109.667	1708	275.333	2877.67	1677
7.83333	103	115	117	1774	1677	1680	261	264	302	2842	2983	2848	1963	1585	1492	7.83333	111.667	1710.33	275.667	2891	1680
8	100	114	117	1781	1671	1682	260	268	300	2861	2981	2845	1982	1588	1483	8	110.333	1711.33	276	2895.67	1684.33
8.16667	100	114	119	1789	1687	1676	263	266	301	2857	3000	2866	1989	1593	1483	8.16667	111	1717.33	276.667	2907.67	1688.33
8.33333	99	114	119	1780	1678	1663	259	264	300	2851	3019	2840	1975	1585	1497	8.33333	110.667	1707	274.333	2903.33	1685.67
8.5	101	112	120	1793	1688	1665	259	267	300	2902	3032	2884	1989	1593	1492	8.5	111	1715.33	275.333	2939.33	1691.33
8.66667	100	110	120	1779	1701	1669	264	269	304	2902	3046	2872	1988	1595	1496	8.66667	110	1716.33	279	2940	1693
8.83333	103	110	121	1792	1686	1669	258	263	301	2905	3059	2905	1994	1598	1499	8.83333	111.333	1715.67	274	2956.33	1697
9	104	113	118	1807	1697	1672	261	267	300	2900	3064	2877	1992	1600	1492	9	111.667	1725.33	276	2947	1694.67
9.16667	101	114	121	1802	1699	1674	259	265	301	2914	3106	2895	2001	1601	1493	9.16667	112	1725	275	2971.67	1698.33
9.33333	101	112	117	1800	1703	1670	259	267	302	2927	3083	2929	1999	1602	1495	9.33333	110	1724.33	276	2979.67	1698.67
9.5	96	114	122	1798	1703	1672	261	264	300	2947	3116	2912	2006	1609	1508	9.5	110.667	1724.33	275	2991.67	1707.67
9.66667	99	114	123	1804	1697	1681	258	265	297	2945	3124	2918	2006	1615	1511	9.66667	112	1727.33	273.333	2995.67	1710.67
9.83333	98	113	120	1808	1701	1680	262	266	303	2950	3150	2918	2007	1613	1505	9.83333	110.333	1729.67	277	3006	1708.33
10	100	112	119	1819	1699	1677	261	266	300	2965	3158	2933	2024	1611	1508	10	110.333	1731.67	275.667	3018.67	1714.33
10.1667	95	110	120	1817	1702	1682	264	266	300	2987	3182	2953	2013	1614	1512	10.1667	108.333	1733.67	276.667	3040.67	1713
10.3333	100	110	122	1816	1724	1680	261	268	299	2969	3182	2949	2021	1622	1512	10.3333	110.667	1740	276	3033.33	1718.33
10.5	97	111	120	1823	1722	1688	261	265	300	2998	3198	2960	2023	1620	1514	10.5	109.333	1744.33	275.333	3052	1719
10.6667	101	112	120	1820	1723	1685	267	268	303	3003	3201	2945	2023	1619	1515	10.6667	111	1742.67	279.333	3049.67	1719
10.8333	100	113	121	1831	1728	1701	259	265	301	3022	3223	2974	2036	1627	1516	10.8333	111.333	1753.33	275	3073	1726.33
11	98	113	122	1835	1728	1693	257	268	299	3008	3241	3006	2039	1630	1507	11	111	1752	274.667	3085	1725.33
11.1667	100	114	126	1832	1724	1694	261	263	297	3029	3268	2966	2024	1628	1516	11.1667	113.333	1750	273.667	3087.67	1722.67
11.3333	99	113	123	1835	1733	1708	258	264	295	3026	3249	3001	2029	1629	1523	11.3333	111.667	1758.67	272.333	3092	1727
11.5	102	112	128	1835	1732	1699	256	265	298	3041	3271	3007	2031	1630	1518	11.5	114	1755.33	273	3106.33	1726.33
11.6667	99	113	127	1844	1737	1698	257	264	299	3059	3293	2994	2032	1624	1517	11.6667	113	1759.67	273.333	3115.33	1724.33
11.8333	100	114	128	1841	1739	1710	265	265	295	3065	3316	3036	2035	1631	1526	11.8333	114	1763.33	275	3139	1730.67
12	99	113	123	1849	1744	1711	262	268	297	3062	3340	3026	2042	1629	1529	12	111.667	1768	275.667	3142.67	1733.33
12.1667	99	112	124	1846	1742	1711	260	262	296	3083	3323	3021	2047	1634	1536	12.1667	111.667	1766.33	272.667	3142.33	1739
12.3333	98	114	124	1847	1744	1718	258	267	302	3072	3357	3025	2040	1637	1536	12.3333	112	1769.67	275.667	3151.33	1737.67
12.5	98	111	124	1851	1757	1720	263	269	301	3098	3359	3046	2045	1634	1527	12.5	111	1776	277.667	3167.67	1735.33
12.6667	99	115	123	1846	1746	1717	263	267	299	3112	3366	3045	2041	1636	1529	12.6667	112.333	1769.67	276.333	3174.33	1735.33
12.8333	99	114	124	1872	1755	1725	264	265	297	3104	3380	3065	2040	1639	1534	12.8333	112.333	1784	275.333	3183	1737.67
13	97	111	118	1869	1760	1729	262	266	298	3106	3393	3067	2052	1640	1521	13	108.667	1786	275.333	3188.67	1737.67
13.1667	101	112	121	1868	1761	1740	262	268	300	3131	3390	3070	2047	1645	1530	13.1667	111.333	1789.67	276.667	3197	1740.67
13.3333	99	112	117	1878	1763	1745	266	261	300	3132	3429	3092	2045	1647	1533	13.3333	109.333	1795.33	275.667	3217.67	1741.67
13.5	98	113	120	1884	1768	1741	259	272	295	3145	3451	3102	2053	1640	1531	13.5	110.333	1797.67	275.333	3232.67	1741.33
13.6667	98	115	122	1871	1770	1740	258	264	296	3151	3429	3105	2057	1647	1530	13.6667	111.667	1793.67	272.667	3228.33	1744.67
13.8333	101	112	120	1888	1773	1748	259	267	294	3163	3434	3092	2052	1645	1534	13.8333	111	1803	273.333	3229.67	1743.67
14	98	110	118	1886	1781	1754	260	263	297	3174	3469	3109	2057	1648	1530	14	108.667	1807	273.333	3250.67	1745
14.1667	97	109	116	1884	1776	1750	255	267	297	3180	3478	3104	2055	1643	1532	14.1667	107.333	1803.33	273	3254	1743.33
14.3333	97	112	119	1892	1783	1754	263	267	295	3178	3500	3124	2051	1638	1531	14.3333	109.333	1809.67	275	3267.33	1740
14.5	99	112	123	1902	1789	1762	256	267	296	3197	3516	3128	2066	1649	1538	14.5	111.333	1817.67	273	3280.33	1751
14.6667	97	109	121	1907	1783	1764	259	265	297	3203	3540	3141	2054	1646	1539	14.6667	109	1818	273.667	3294.67	1746.33
14.8333	98	113	117	1899	1784	1763	263	265	296	3196	3534	3141	2058	1655	1546	14.8333	109.333	1815.33	274.667	3290.33	1753
15	98	111	121	1904	1787	1755	261	263	302	3207	3553	3156	2064	1647	1539	15	110	1815.33	275.333	3305.33	1750
15.1667	99	114	120	1909	1797	1766	262	262	296	3201	3554	3162	2070	1652	1545	15.1667	111	1824	273.333	3305.67	1755.67
15.3333	98	112	120	1920	1798	1766	259	261	294	3227	3596	3157	2061	1660	1535	15.3333	110	1828	271.333	3326.67	1752
15.5	96	111	121	1917	1809	1781	260	264	295	3233	3582	3141	2069	1655	1542	15.5	109.333	1835.67	273	3318.67	1755.33
15.6667	100	110	121	1926	1805	1787	259	264	297	3230	3620	3158	2070	1661	1548	15.6667	110.333	1839.33	273.333	3336	1759.67
15.8333	99	114	125	1922	1817	1778	256	263	292	3245	3637	3170	2064	1651	1550	15.8333	112.667	1839	270.333	3350.67	1755
16	99	112	119	1936	1825	1787	261	263	295	3252	3644	3159	2074	1657	1544	16	110	1849.33	273	3351.67	1758.33
16.1667	100	113	122	1940	1819	1794	257	265	295	3262	3647	3170	2074	1659	1548	16.1667	111.667	1851	272.333	3359.67	1760.33
16.3333	100	112	120	1937	1820	1794	257	262	295	3279	3667	3185	2067	1662	1545	16.3333	110.667	1850.33	271.333	3377	1758
16.5	102	114	124	1949	1822	1797	258	263	295	3260	3658	3199	2074	1657	1546	16.5	113.333	1856	272	3372.33	1759
16.6667	97	113	122	1939	1825	1791	262	260	297	3269	3671	3194	2082	1664	1554	16.6667	110.667	1851.67	273	3378	1766.67
16.8333	97	115	121	1936	1834	1800	257	264	291	3278	3698	3208	2084	1664	1553	16.8333	111	1856.67	270.667	3394.67	1767
17	102	111	120	1962	1831	1808	262	260	290	3255	3682	3212	2078	1667	1548	17	111	1867	270.667	3383	1764.33
17.1667	99	112	123	1957	1839	1811	265	262	299	3309	3703	3230	2091	1670	1556	17.1667	111.333	1869	275.333	3414	1772.33
17.3333	100	111	118	1960	1841	1817	261	260	293	3313	3725	3244	2086	1659	1555	17.3333	109.667	1872.67	271.333	3427.33	1766.67
17.5	96	114	121	1964	1840	1815	262	264	293	3323	3749	3227	2078	1670	1557	17.5	110.333	1873	273	3433	1768.33
17.6667	96	113	115	1972	1839	1817	260	261	292	3323	3752	3240	2087	1668	1553	17.6667	108	1876	271	3438.33	1769.33
17.8333	99	112	117	1973	1851	1827	259	266	292	3320	3786	3244	2088	1662	1549	17.8333	109.333	1883.67	272.333	3450	1766.33
18	100	112	115	1979	1857	1827	255	262	296	3330	3763	3248	2073	1663	1549	18	109	1887.67	271	3447	1761.67
18.1667	101	110	112	1983	1847	1833	262	265	294	3338	3781	3239	2089	1668	1554	18.1667	107.667	1887.67	273.667	3452.67	1770.33
18.3333	99	112	114	1983	1856	1832	262	264	291	3344	3805	3257	2084	1677	1552	18.3333	108.333	1890.33	272.333	3468.67	1771
18.5	98	112	114	1977	1860	1830	256	265	294	3333	3825	3264	2092	1669	1555	18.5	108	1889	271.667	3474	1772
18.6667	97	114	113	1994	1871	1833	258	259	296	3350	3826	3272	2095	1675	1552	18.6667	108	1899.33	271	3482.67	1774
18.8333	100	112	115	1993	1867	1843	257	262	293	3362	3822	3262	2082	1669	1554	18.8333	109	1901	270.667	3482	1768.33
19	100	113	111	2001	1869	1848	259	260	293	3352	3837	3266	2101	1679	1562	19	108	1906	270.667	3485	1780.67
19.1667	97	115	112	2000	1873	1837	258	261	295	3375	3836	3277	2098	1681	1562	19.1667	108	1903.33	271.333	3496	1780.33
19.3333	101	115	116	2008	1878	1842	256	260	292	3407	3858	3278	2101	1679	1563	19.3333	110.667	1909.33	269.333	3514.33	1781
19.5	98	114	111	2007	1875	1855	259	262	289	3389	3882	3277	2090	1671	1566	19.5	107.667	1912.33	270	3516	1775.67
19.6667	101	108	116	2007	1876	1850	255	257	293	3397	3901	3288	2090	1683	1562	19.6667	108.333	1911	268.333	3528.67	1778.33
19.8333	99	112	113	2015	1892	1852	258	263	295	3397	3923	3295	2102	1693	1568	19.8333	108	1919.67	272	3538.33	1787.67
20	96	110	112	2015	1888	1860	263	259	289	3425	3920	3297	2097	1684	1563	20	106	1921	270.333	3547.33	1781.33
20.1667	96	115	112	2024	1884	1870	253	264	294	3413	3962	3311	2102	1683	1561	20.1667	107.667	1926	270.333	3562	1782
20.3333	99	115	113	2027	1896	1873	258	262	292	3412	3939	3316	2109	1685	1567	20.3333	109	1932	270.667	3555.67	1787
20.5	101	114	112	2027	1903	1874	261	260	292	3420	3935	3321	2105	1688	1563	20.5	109	1934.67	271	3558.67	1785.33
20.6667	99	111	111	2032	1903	1878	260	259	290	3422	3964	3328	2100	1688	1569	20.6667	107	1937.67	269.667	3571.33	1785.67
20.8333	99	111	113	2037	1917	1877	257	261	292	3438	3992	3320	2109	1688	1571	20.8333	107.667	1943.67	270	3583.33	1789.33
21	97	113	110	2045	1916	1882	261	261	289	3443	3989	3334	2110	1699	1571	21	106.667	1947.67	270.333	3588.67	1793.33
21.1667	98	110	109	2043	1910	1895	256	260	291	3474	4001	3336	2109	1683	1576	21.1667	105.667	1949.33	269	3603.67	1789.33
21.3333	100	113	110	2056	1908	1882	261	260	288	3470	4020	3350	2103	1683	1573	21.3333	107.667	1948.67	269.667	3613.33	1786.33
21.5	100	115	111	2052	1911	1888	256	255	292	3457	4034	3356	2111	1689	1573	21.5	108.667	1950.33	267.667	3615.67	1791
21.6667	95	112	106	2055	1925	1893	258	263	289	3465	4024	3372	2107	1691	1575	21.6667	104.333	1957.67	270	3620.33	1791
21.8333	99	111	114	2058	1929	1904	258	260	293	3455	4050	3348	2108	1693	1571	21.8333	108	1963.67	270.333	3617.67	1790.67
22	99	114	112	2061	1937	1910	258	259	289	3486	4052	3341	2112	1689	1571	22	108.333	1969.33	268.667	3626.33	1790.67
22.1667	97	112	110	2063	1942	1897	257	259	288	3483	4061	3356	2117	1700	1579	22.1667	106.333	1967.33	268	3633.33	1798.67
22.3333	98	112	110	2072	1934	1905	257	259	289	3494	4083	3346	2108	1699	1578	22.3333	106.667	1970.33	268.333	3641	1795
22.5	98	117	112	2084	1940	1920	255	254	291	3492	4082	3359	2109	1688	1577	22.5	109	1981.33	266.667	3644.33	1791.33
22.6667	102	112	112	2070	1949	1914	259	261	290	3506	4076	3385	2100	1698	1575	22.6667	108.667	1977.67	270	3655.67	1791
22.8333	97	113	113	2082	1940	1917	254	259	288	3509	4108	3367	2119	1692	1575	22.8333	107.667	1979.67	267	3661.33	1795.33
23	98	114	111	2089	1954	1925	256	259	287	3506	4125	3359	2119	1695	1578	23	107.667	1989.33	267.333	3663.33	1797.33
23.1667	97	113	113	2094	1955	1928	256	260	292	3519	4122	3373	2123	1702	1565	23.1667	107.667	1992.33	269.333	3671.33	1796.67
23.3333	99	112	112	2097	1962	1927	254	258	290	3529	4148	3377	2118	1705	1573	23.3333	107.667	1995.33	267.333	3684.67	1798.67
23.5	95	111	111	2098	1959	1932	255	257	291	3567	4161	3395	2108	1705	1577	23.5	105.667	1996.33	267.667	3707.67	1796.67
23.6667	101	113	111	2104	1955	1936	259	261	290	3527	4194	3393	2116	1707	1576	23.6667	108.333	1998.33	270	3704.67	1799.67
23.8333	99	114	111	2104	1968	1934	256	264	289	3559	4188	3408	2126	1702	1577	23.8333	108	2002	269.667	3718.33	1801.67
24	99	113	113	2112	1966	1929	251	261	288	3543	4200	3417	2119	1711	1579	24	108.333	2002.33	266.667	3720	1803
24.1667	96	112	112	2097	1979	1943	258	260	290	3537	4216	3404	2127	1707	1584	24.1667	106.667	2006.33	269.333	3719	1806
24.3333	102	113	114	2102	1972	1953	252	259	288	3569	4217	3427	2132	1700	1568	24.3333	109.667	2009	266.333	3737.67	1800
24.5	99	116	113	2119	1976	1956	262	262	288	3568	4209	3423	2117	1703	1579	24.5	109.333	2017	270.667	3733.33	1799.67
24.6667	97	109	110	2112	1977	1956	254	260	290	3572	4241	3417	2136	1698	1582	24.6667	105.333	2015	268	3743.33	1805.33
24.8333	100	112	115	2118	1983	1958	253	260	289	3569	4259	3424	2122	1708	1589	24.8333	109	2019.67	267.333	3750.67	1806.33
25	101	113	111	2117	1986	1973	253	260	285	3570	4257	3461	2122	1711	1586	25	108.333	2025.33	266	3762.67	1806.33
25.1667	98	113	112	2127	1999	1963	260	257	289	3587	4261	3456	2127	1708	1581	25.1667	107.667	2029.67	268.667	3768	1805.33
25.3333	99	112	111	2135	1991	1972	255	260	289	3599	4312	3464	2127	1712	1594	25.3333	107.333	2032.67	268	3791.67	1811
25.5	99	112	110	2138	1996	1977	253	259	289	3605	4295	3456	2131	1710	1585	25.5	107	2037	267	3785.33	1808.67
25.6667	99	112	111	2148	2005	1982	256	260	285	3608	4310	3466	2141	1711	1584	25.6667	107.333	2045	267	3794.67	1812
25.8333	98	114	112	2157	2009	1986	253	259	287	3599	4311	3477	2136	1709	1588	25.8333	108	2050.67	266.333	3795.67	1811
26	100	114	113	2153	2006	1982	257	258	284	3624	4324	3479	2136	1709	1589	26	109	2047	266.333	3809	1811.33
26.1667	99	117	113	2155	2014	1997	256	259	290	3623	4325	3465	2133	1702	1603	26.1667	109.667	2055.33	268.333	3804.33	1812.67
26.3333	97	113	112	2158	2015	1998	255	254	290	3653	4342	3473	2131	1713	1591	26.3333	107.333	2057	266.333	3822.67	1811.67
26.5	97	113	108	2164	2023	1999	249	255	286	3639	4354	3473	2132	1715	1590	26.5	106	2062	263.333	3822	1812.33
26.6667	98	112	113	2168	2021	1999	256	257	287	3650	4375	3486	2147	1722	1584	26.6667	107.667	2062.67	266.667	3837	1817.67
26.8333	98	113	112	2161	2039	2002	256	257	289	3631	4377	3485	2145	1721	1596	26.8333	107.667	2067.33	267.333	3831	1820.67
27	97	113	111	2175	2034	2005	258	263	289	3646	4385	3463	2132	1713	1594	27	107	2071.33	270	3831.33	1813
27.1667	99	114	111	2181	2041	2010	252	259	285	3644	4407	3495	2146	1712	1592	27.1667	108	2077.33	265.333	3848.67	1816.67
27.3333	100	114	113	2185	2033	2015	253	262	285	3657	4410	3480	2149	1717	1600	27.3333	109	2077.67	266.667	3849	1822
27.5	98	111	112	2194	2040	2016	251	260	287	3658	4424	3506	2127	1718	1595	27.5	107	2083.33	266	3862.67	1813.33
27.6667	97	112	113	2183	2045	2019	254	258	284	3670	4416	3510	2127	1720	1598	27.6667	107.333	2082.33	265.333	3865.33	1815
27.8333	98	112	110	2201	2052	2017	250	257	288	3667	4459	3511	2134	1729	1595	27.8333	106.667	2090	265	3879	1819.33
28	97	115	112	2195	2053	2030	252	261	283	3668	4442	3520	2149	1729	1603	28	108	2092.67	265.333	3876.67	1827
28.1667	98	114	113	2204	2060	2022	256	256	286	3689	4431	3510	2152	1720	1609	28.1667	108.333	2095.33	266	3876.67	1827
28.3333	98	113	113	2206	2056	2046	256	257	288	3656	4492	3522	2141	1715	1596	28.3333	108	2102.67	267	3890	1817.33
28.5	99	113	111	2208	2065	2039	257	258	291	3690	4478	3532	2144	1724	1593	28.5	107.667	2104	268.667	3900	1820.33
28.6667	100	111	113	2198	2065	2049	256	257	287	3690	4479	3518	2137	1721	1600	28.6667	108	2104	266.667	3895.67	1819.33
28.8333	101	113	112	2214	2073	2043	253	256	284	3693	4505	3521	2150	1735	1608	28.8333	108.667	2110	264.333	3906.33	1831
29	102	114	111	2218	2079	2037	256	257	287	3679	4501	3516	2141	1724	1602	29	109	2111.33	266.667	3898.67	1822.33
29.1667	102	114	111	2224	2076	2055	254	260	288	3705	4549	3535				29.1667	109	2118.33	267.333
29.3333	102	114	111	2228	2075	2062	254	255	284	3716	4541	3538				29.3333	109	2121.67	264.333
29.5	100	116	112	2229	2084	2057	251	255	287	3723	4547	3546				29.5	109.333	2123.33	264.333
29.6667	99	112	109	2226	2080	2060	256	260	286	3760	4556	3550				29.6667	106.667	2122	267.333
29.8333	100	114	110	2238	2088	2059	257	256	286	3717	4569	3543				29.8333	108	2128.33	266.333
30	101	112	113	2237	2084	2059	256	253	285	3740	4566	3556				30	108.667	2126.67	264.667
30.1667	98	119	110	2244	2099	2075	254	252	282	3734	4603	3547				30.1667	109	2139.33	262.667
30.3333	97	113	112	2252	2106	2080	253	258	288	3726	4572	3542				30.3333	107.333	2146	266.333
30.5	96	115	111	2253	2101	2076	254	260	285	3769	4615	3561				30.5	107.333	2143.33	266.333
30.6667	95	114	109	2241	2110	2086	254	260	283	3751	4623	3556				30.6667	106	2145.67	265.667
30.8333	96	112	108	2255	2107	2083	252	260	288	3763	4600	3585				30.8333	105.333	2148.33	266.667
31	98	109	111	2267	2112	2094	249	256	283	3746	4625	3563				31	106	2157.67	262.667
31.1667	100	111	114	2271	2107	2092	252	253	285	3771	4645	3575				31.1667	108.333	2156.67	263.333
31.3333	101	111	110	2268	2118	2089	256	257	284	3760	4653	3568				31.3333	107.333	2158.33	265.667
31.5	95	116	112	2278	2118	2094	252	255	287	3806	4669	3587				31.5	107.667	2163.33	264.667
31.6667	100	110	112	2265	2129	2093	250	257	280	3792	4625	3591				31.6667	107.333	2162.33	262.333
31.8333	99	110	112	2283	2120	2101	256	256	283	3806	4641	3594				31.8333	107	2168	265
32	100	115	111	2288	2133	2101	256	257	284	3804	4684	3583				32	108.667	2174	265.667
32.1667	98	110	112	2278	2127	2108	253	255	286							32.1667	106.667	2171
32.3333	100	113	112	2284	2143	2111										32.3333	108.333	2179.33
32.5	100	116	111	2300	2140	2125										32.5	109	2188.33
32.6667	96	112	108	2296	2140	2123										32.6667	105.333	2186.33
32.8333	99	115	115	2306	2146	2116										32.8333	109.667	2189.33
33	98	112	113	2310	2152	2133										33	107.667	2198.33
33.1667	99	112	112	2304	2154	2128										33.1667	107.667	2195.33
33.3333	99	111	109	2317	2150	2130										33.3333	106.333	2199
33.5	99	111	111	2316	2164	2138										33.5	107	2206
33.6667	98	112	113	2316	2167	2134										33.6667	107.667	2205.67
33.8333	97	112	113	2326	2167	2153										33.8333	107.333	2215.33
34	99	114	115	2328	2159	2146										34	109.333	2211
34.1667	100	113	112	2328	2170	2152										34.1667	108.333	2216.67
34.3333	99	116	112	2329	2182	2156										34.3333	109	2222.33
34.5	98	115	110	2336	2185	2146										34.5	107.667	2222.33
34.6667	97	112	113	2335	2179	2167										34.6667	107.333	2227
34.8333	99	110	107	2341	2176	2155										34.8333	105.333	2224
35	100	114	110	2346	2182	2156										35	108	2228
35.1667	98	113	114	2343	2196	2172										35.1667	108.333	2237
35.3333	99	112	113	2355	2202	2167										35.3333	108	2241.33
35.5	98	112	115	2352	2195	2179										35.5	108.333	2242
35.6667	100	115	112	2361	2203	2182										35.6667	109	2248.67
35.8333	97	112	114	2368	2208	2187										35.8333	107.667	2254.33
36	100	110	111	2362	2205	2183										36	107	2250
36.1667	99	112	109	2375	2217	2185										36.1667	106.667	2259
36.3333	97	114	114	2374	2219	2192										36.3333	108.333	2261.67
36.5	99	113	112	2366	2208	2198										36.5	108	2257.33
36.6667	99	112	110	2374	2226	2194										36.6667	107	2264.67
36.8333	100	111	111	2378	2229	2200										36.8333	107.333	2269
37	99	113	114	2378	2226	2206										37	108.667	2270
37.1667	99	113	112	2391	2235	2203										37.1667	108	2276.33
37.3333	100	112	113	2392	2235	2210										37.3333	108.333	2279
37.5	97	114	114	2398	2233	2211										37.5	108.333	2280.67
37.6667	100	114	114	2395	2249	2207										37.6667	109.333	2283.67
37.8333	102	115	115	2399	2244	2223										37.8333	110.667	2288.67
38	99	113	111	2403	2247	2230										38	107.667	2293.33
38.1667	97	114	111	2419	2259	2232										38.1667	107.333	2303.33
38.3333	98	112	112	2411	2257	2223										38.3333	107.333	2297
38.5	100	111	111	2414	2250	2232										38.5	107.333	2298.67
38.6667	98	112	113	2412	2251	2232										38.6667	107.667	2298.33
38.8333	102	112	112	2414	2252	2232										38.8333	108.667	2299.33
39	98	113	110	2415	2265	2228										39	107	2302.67
39.1667	101	112	112	2412	2257	2235										39.1667	108.333	2301.33
39.3333	99	116	112	2429	2257	2241										39.3333	109	2309
39.5	99	112	111	2424	2269	2239										39.5	107.333	2310.67
39.6667	98	112	111	2421	2270	2247										39.6667	107	2312.67
39.8333	98	109	109	2425	2272	2253										39.8333	105.333	2316.67
40	100	110	111	2436	2280	2255										40	107	2323.67
40.1667	99	113	113	2445	2284	2262										40.1667	108.333	2330.33
40.3333	96	113	110	2436	2290	2267										40.3333	106.333	2331
40.5	96	115	110	2443	2287	2261										40.5	107	2330.33
40.6667	99	112	112	2443	2276	2268										40.6667	107.667	2329
40.8333	98	112	109	2453	2293	2275										40.8333	106.333	2340.33
41	101	113	111	2459	2298	2269										41	108.333	2342
41.1667	99	116	111	2459	2304	2279										41.1667	108.667	2347.33
41.3333	97	110	111	2463	2301	2280										41.3333	106	2348
41.5	99	115	111	2466	2299	2271										41.5	108.333	2345.33
41.6667	98	112	110	2470	2314	2273										41.6667	106.667	2352.33
41.8333	100	112	112	2475	2311	2293										41.8333	108	2359.67
42	99	116	110	2484	2313	2292										42	108.333	2363
42.1667	97	113	111	2489	2318	2297										42.1667	107	2368
42.3333	98	113	112	2481	2334	2307										42.3333	107.667	2374
42.5	96	112	109	2490	2321	2303										42.5	105.667	2371.33
42.6667	99	110	110	2487	2335	2307										42.6667	106.333	2376.33
42.8333	98	113	113	2497	2329	2315										42.8333	108	2380.33
43	99	111	114	2500	2339	2316										43	108	2385
43.1667	98	112	109	2498	2335	2309										43.1667	106.333	2380.67
43.3333	97	113	110	2503	2340	2320										43.3333	106.667	2387.67
43.5	98	111	111	2516	2353	2325										43.5	106.667	2398
43.6667	100	113	112	2508	2354	2340										43.6667	108.333	2400.67
43.8333	99	113	109	2523	2350	2337										43.8333	107	2403.33
44	101	114	109	2520	2374	2329										44	108	2407.67
44.1667	101	113	108													44.1667	107.333
44.3333	99	114	111													44.3333	108
44.5	97	113	110													44.5	106.667
44.6667	100	110	111													44.6667	107
44.8333	101	113	110													44.8333	108
45	100	114	111													45	108.333
45.1667	101	111	111													45.1667	107.667
45.3333	98	112	110													45.3333	106.667
45.5	100	114	111													45.5	108.333
45.6667	101	111	112													45.6667	108
45.8333	100	111	111													45.8333	107.333
46	100	116	109													46	108.333
46.1667	100	115	111													46.1667	108.667
46.3333	98	112	112													46.3333	107.333
46.5	99	113	108													46.5	106.667
46.6667	100	112	112													46.6667	108
46.8333	99	113	110													46.8333	107.333
47	101	113	110													47	108
47.1667	98	114	110													47.1667	107.333
47.3333	98	114	111													47.3333	107.667
47.5	101	114	111													47.5	108.667
47.6667	97	112	109													47.6667	106
47.8333	102	111	110													47.8333	107.667
48	102	116	110													48	109.333
48.1667	100	114	112													48.1667	108.667
48.3333	98	111	111													48.3333	106.667
48.5	101	111	110													48.5	107.333
48.6667	100	111	111													48.6667	107.333
48.8333	100	113	109													48.8333	107.333
49	100	113	110													49	107.667
49.1667	102	110	112													49.1667	108
49.3333	99	112	111													49.3333	107.333
49.5	98	114	110													49.5	107.333
49.6667	100	113	110													49.6667	107.667
49.8333	100	112	112													49.8333	108
50	95	113	112													50	106.667
50.1667	100	112	106													50.1667	106
50.3333	99	113	109													50.3333	107
50.5	100	111	112													50.5	107.667
50.6667	98	111	111													50.6667	106.667
50.8333	101	115	111													50.8333	109
51	98	114	111													51	107.667
51.1667	99	110	109													51.1667	106
51.3333	101	113	109													51.3333	107.667
51.5	99	113	114													51.5	108.667
51.6667	98	110	110													51.6667	106
51.8333	97	111	113													51.8333	107
52	103	113	112													52	109.333
52.1667	97	113	115													52.1667	108.333
52.3333	96	112	110													52.3333	106
52.5	100	112	112													52.5	108
52.6667	101	114	109													52.6667	108
52.8333	99	111	112													52.8333	107.333
53	98	111	112													53	107
53.1667	102	112	110													53.1667	108
53.3333	100	113	111													53.3333	108
53.5	96	111	112													53.5	106.333
53.6667	99	115	110													53.6667	108
53.8333	99	115	110													53.8333	108
54	98	115	109													54	107.333
54.1667	96	115	111													54.1667	107.333
54.3333	97	115	111													54.3333	107.667
54.5	100	111	110													54.5	107
54.6667	101	112	108													54.6667	107
54.8333	101	112	108													54.8333	107
55	99	113	107													55	106.333
55.1667	99	111	111													55.1667	107
55.3333	100	110	109													55.3333	106.333
55.5	97	114	109													55.5	106.667
55.6667	96	116	108													55.6667	106.667
55.8333	98	112	111													55.8333	107
56	100	115	109													56	108
56.1667	97	111	110													56.1667	106
56.3333	100	111	111													56.3333	107.333
56.5	100	111	113													56.5	108
56.6667	100	114	112													56.6667	108.667
56.8333	99	110	108													56.8333	105.667
57	100	111	110													57	107
57.1667	101	113	108													57.1667	107.333
57.3333	97	116	110													57.3333	107.667
57.5	100	111	110													57.5	107
57.6667	101	111	111													57.6667	107.667
57.8333	97	108	111													57.8333	105.333
58	99	114	110													58	107.667
58.1667	99	115	109													58.1667	107.667
58.3333	101	109	109													58.3333	106.333
58.5	99	114	110													58.5	107.667
58.6667	98	113	111													58.6667	107.333
58.8333	100	115	110													58.8333	108.333
59	98	116	110													59	108
59.1667	97	112	111													59.1667	106.667
59.3333	100	114	107													59.3333	107
59.5	99	113	108													59.5	106.667
59.6667	99	114	111													59.6667	108
59.8333	100	114	112													59.8333	108.667
60	98	114	111													60	107.667
60.1667	100	113	110													60.1667	107.667
60.3333	100	113	109													60.3333	107.333
60.5	102	114	110													60.5	108.667
60.6667	100	114	112													60.6667	108.667
60.8333	101	113	112													60.8333	108.667
61	98	113	106													61	105.667
61.1667	101	111	108													61.1667	106.667
61.3333	103	114	111													61.3333	109.333
61.5	102	111	110													61.5	107.667
61.6667	101	113	110													61.6667	108
61.8333	103	111	112													61.8333	108.667
62	103	113	110													62	108.667
62.1667	100	112	111													62.1667	107.667
62.3333	99	113	108													62.3333	106.667
62.5	103	110	111													62.5	108
62.6667	102	113	110													62.6667	108.333
62.8333	102	113	107													62.8333	107.333
63	102	115	110													63	109
63.1667	102	114	113													63.1667	109.667
63.3333	99	112	110													63.3333	107
63.5	106	116	109													63.5	110.333
63.6667	97	115	110													63.6667	107.333
63.8333	102	113	107													63.8333	107.333
64	100	112	109													64	107
64.1667	101	113	112													64.1667	108.667
64.3333	101	113	113													64.3333	109
64.5	101	112	109													64.5	107.333
64.6667	98	116	109													64.6667	107.667
64.8333	100	113	110													64.8333	107.667
65	102	116	111													65	109.667
65.1667	106	113	108													65.1667	109
65.3333	103	113	113													65.3333	109.667
65.5	102	114	110													65.5	108.667
65.6667	101	114	114													65.6667	109.667
65.8333	103	109	110													65.8333	107.333
66	100	114	108													66	107.333
66.1667	99	116	110													66.1667	108.333
66.3333	102	115	109													66.3333	108.667
66.5	102	115	111													66.5	109.333
66.6667	101	112	113													66.6667	108.667
66.8333	100	115	109													66.8333	108
67	103	113	112													67	109.333
67.1667	100	115	112													67.1667	109
67.3333	100	113	111													67.3333	108
67.5	102	113	110													67.5	108.333
67.6667	102	112	111													67.6667	108.333
67.8333	100	114	112													67.8333	108.667
68	99	113	112													68	108
68.1667	102	117	113													68.1667	110.667
68.3333	102	113	112													68.3333	109
68.5	101	115	110													68.5	108.667
68.6667	101	112	112													68.6667	108.333
68.8333	102	114	112													68.8333	109.333
69	101	115	109													69	108.333
69.1667	102	114	109													69.1667	108.333
69.3333	105	114	113													69.3333	110.667
69.5	103	113	112													69.5	109.333
69.6667	103	113	111													69.6667	109
69.8333	100	113	110													69.8333	107.667
70	101	114	112													70	109
70.1667	103	114	107													70.1667	108
70.3333	101	117	110													70.3333	109.333
70.5	100	116	109													70.5	108.333
70.6667	103	115	109													70.6667	109
70.8333	103	113	111													70.8333	109
71	101	114	111													71	108.667
71.1667	105	113	112													71.1667	110
71.3333	103	112	113													71.3333	109.333
71.5	104	114	112													71.5	110
71.6667	104	115	110													71.6667	109.667
71.8333	103	115	109													71.8333	109
72	104	115	112													72	110.333
72.1667	103	118	110													72.1667	110.333
72.3333	103	117	110													72.3333	110
72.5	105	117	111													72.5	111
72.6667	102	115	114													72.6667	110.333
72.8333	102	112	112													72.8333	108.667
73	104	118	109													73	110.333
73.1667	103	116	112													73.1667	110.333
73.3333	102	115	114													73.3333	110.333
73.5	102	116	111													73.5	109.667
73.6667	101	116	111													73.6667	109.333
73.8333	103	116	110													73.8333	109.667
74	102	115	111													74	109.333
74.1667	102	115	111													74.1667	109.333
74.3333	104	118	113													74.3333	111.667
74.5	104	115	112													74.5	110.333
74.6667	103	116	108													74.6667	109
74.8333	103	115	112													74.8333	110
75	103	117	109													75	109.667
75.1667	100	116	113													75.1667	109.667
75.3333	101	116	110													75.3333	109
75.5	104	119	110													75.5	111
75.6667	101	117	110													75.6667	109.333
75.8333	103	114	110													75.8333	109
76	102	115	108													76	108.333
76.1667	103	115	112													76.1667	110
76.3333	101	117	109													76.3333	109
76.5	105	116	112													76.5	111
76.6667	104	115	111													76.6667	110
76.8333	103	117	111													76.8333	110.333
77	104	117	112													77	111
77.1667	104	118	109													77.1667	110.333
77.3333	106	114	111													77.3333	110.333
77.5	102	117	110													77.5	109.667
77.6667	106	120	110													77.6667	112
77.8333	103	114	110													77.8333	109
78	104	118	114													78	112
78.1667	104	116	111													78.1667	110.333
78.3333	105	118	109													78.3333	110.667
78.5	105	119	110													78.5	111.333
78.6667	101	118	111													78.6667	110
78.8333	106	118	114													78.8333	112.667
79	104	119	111													79	111.333
79.1667	102	115	109													79.1667	108.667
79.3333	105	119	111													79.3333	111.667
79.5	102	115	112													79.5	109.667
79.6667	105	116	113													79.6667	111.333
79.8333	106	116	112													79.8333	111.333
80	105	118	108													80	110.333
80.1667	107	118	110													80.1667	111.667
80.3333	101	115	109													80.3333	108.333
80.5	103	114	111													80.5	109.333
80.6667	106	118	112													80.6667	112
80.8333	105	116	112													80.8333	111
81	105	115	109													81	109.667
81.1667	105	115	109													81.1667	109.667
81.3333	108	115	110													81.3333	111
81.5	108	114	111													81.5	111
81.6667	107	119	113													81.6667	113
81.8333	105	115	109													81.8333	109.667
82	106	119	108													82	111
82.1667	104	120	112													82.1667	112
82.3333	106	115	111													82.3333	110.667
82.5	106	117	112													82.5	111.667
82.6667	107	116	114													82.6667	112.333
82.8333	107	116	109													82.8333	110.667
83	106	116	110													83	110.667
83.1667	107	119	111													83.1667	112.333
83.3333	110	120	111													83.3333	113.667
83.5	106	114	110													83.5	110
83.6667	106	116	111													83.6667	111
83.8333	106	118	112													83.8333	112
84	107	118	110													84	111.667
84.1667	108	117	109													84.1667	111.333
84.3333	108	116	111													84.3333	111.667
84.5	111	115	111													84.5	112.333
84.6667	109	116	107													84.6667	110.667
84.8333	110	114	111													84.8333	111.667
85	109	115	109													85	111
85.1667	108	118	109													85.1667	111.667
85.3333	109	114	111													85.3333	111.333
85.5	106	118	111													85.5	111.667
85.6667	110	117	110													85.6667	112.333
85.8333	107	120	109													85.8333	112
86	108	119	111													86	112.667
86.1667	110	118	113													86.1667	113.667
86.3333	108	120	111													86.3333	113
86.5	106	118	112													86.5	112
86.6667	111	117	111													86.6667	113
86.8333	111	118	109													86.8333	112.667
87	108	117	111													87	112
87.1667	111	120	115													87.1667	115.333
87.3333	112	119	112													87.3333	114.333
87.5	113	120	114													87.5	115.667
87.6667	111	118	111													87.6667	113.333
87.8333	112	119	114													87.8333	115
88	111	118	109													88	112.667
88.1667	110	120	112													88.1667	114
88.3333	111	118	113													88.3333	114
88.5	112	120	111													88.5	114.333
88.6667	112	119	112													88.6667	114.333
88.8333	109	119	111													88.8333	113
89	112	120	110													89	114
89.1667	112	116	110													89.1667	112.667
89.3333	113	117	110													89.3333	113.333
89.5	116	118	111													89.5	115
89.6667	108	120	111													89.6667	113
89.8333	111	121	112													89.8333	114.667
90	110	120	112													90	114
90.1667	111	120	114													90.1667	115
90.3333	111	118	113													90.3333	114
90.5	111	120	112													90.5	114.333
90.6667	113	119	109													90.6667	113.667
90.8333	112	121	111													90.8333	114.667
91	109	120	109													91	112.667
91.1667	115	119	109													91.1667	114.333
91.3333	114	118	112													91.3333	114.667
91.5	114	118	108													91.5	113.333
91.6667	114	120	114													91.6667	116
91.8333	113	122	115													91.8333	116.667
92	114	118	113													92	115
92.1667	113	121	112													92.1667	115.333
92.3333	114	121	112													92.3333	115.667
92.5	115	116	111													92.5	114
92.6667	116	121	110													92.6667	115.667
92.8333	114	115	109													92.8333	112.667
93	115	118	112													93	115
93.1667	111	123	112													93.1667	115.333
93.3333	117	117	113													93.3333	115.667
93.5	115	120	111													93.5	115.333
93.6667	113	119	113													93.6667	115

## Sheet: PSMa3
0.25 mg/mL PSMα3 monomers in the absence and presence of seeds of the other PSM peptides
Raw data													Averaged data
Time (h)	Unseeded	Unseeded	Unseeded	PSMα1 seeds	PSMα1 seeds	PSMα1 seeds	PSMβ1 seeds	PSMβ1 seeds	PSMβ1 seeds	PSMβ2 seeds	PSMβ2 seeds	PSMβ2 seeds	Time (h)	Unseeded	Time (h)	PSMα1 seeds	PSMβ1 seeds	PSMβ2 seeds
0	129	130	123	340	654	745	898	852	930	309	277	298	0	127.333	0	579.667	893.333	294.667
0.00555556	138	126	125	695	1023	1009	839	784	850	500	674	390	0.166667	129.667	0.166667	909	824.333	521.333
0.0111111	132	126	123	925	1188	1164	814	769	837	6066	6298	4715	0.333333	127	0.333333	1092.33	806.667	5693
0.0166667	131	128	124	2373	1727	1627	814	759	850	7134	6734	5082	0.5	127.667	0.5	1909	807.667	6316.67
0.0222222	136	130	121	2803	2823	2693	837	781	874	7396	6819	5019	0.666667	129	0.666667	2773	830.667	6411.33
0.0277778	130	126	120	2776	3015	2917	862	803	913	7515	6857	4945	0.833333	125.333	0.833333	2902.67	859.333	6439
0.0333333	134	127	120	2721	2979	2880	903	837	980	7558	6790	4830	1	127	1	2860	906.667	6392.67
0.0388889	135	128	120	2704	2954	2901	955	870	1070	7555	6755	4720	1.16667	127.667	1.16667	2853	965	6343.33
0.0444444	133	130	118	2713	2935	3023	1017	914	1137	7546	6658	4633	1.33333	127	1.33333	2890.33	1022.67	6279
0.05	137	129	119	2737	2936	3072	1078	979	1217	7542	6591	4527	1.5	128.333	1.5	2915	1091.33	6220
0.0555556	134	125	124	2754	2959	3162	1150	1050	1283	7527	6491	4428	1.66667	127.667	1.66667	2958.33	1161	6148.67
0.0611111	136	131	124	2766	3011	3187	1222	1114	1323	7487	6393	4365	1.83333	130.333	1.83333	2988	1219.67	6081.67
0.0666667	136	128	125	2786	3037	3234	1289	1166	1373	7460	6329	4280	2	129.667	2	3019	1276	6023
0.0722222	138	129	123	2796	3062	3288	1351	1238	1405	7420	6222	4216	2.16667	130	2.16667	3048.67	1331.33	5952.67
0.0777778	134	128	124	2809	3063	3322	1402	1287	1427	7356	6164	4146	2.33333	128.667	2.33333	3064.67	1372	5888.67
0.0833333	139	133	124	2829	3075	3410	1452	1344	1473	7307	6055	4069	2.5	132	2.5	3104.67	1423	5810.33
0.0888889	140	134	126	2855	3085	3476	1502	1384	1501	7277	5972	4010	2.66667	133.333	2.66667	3138.67	1462.33	5753
0.0944444	140	133	120	2868	3101	3551	1549	1408	1510	7205	5900	3950	2.83333	131	2.83333	3173.33	1489	5685
0.1	145	129	123	2886	3128	3581	1582	1470	1541	7144	5823	3887	3	132.333	3	3198.33	1531	5618
0.105556	141	131	128	2907	3139	3607	1605	1500	1555	7106	5742	3847	3.16667	133.333	3.16667	3217.67	1553.33	5565
0.111111	146	130	123	2908	3192	3636	1644	1538	1580	7050	5681	3790	3.33333	133	3.33333	3245.33	1587.33	5507
0.116667	146	132	125	2927	3180	3657	1669	1563	1596	6990	5589	3737	3.5	134.333	3.5	3254.67	1609.33	5438.67
0.122222	143	134	129	2932	3218	3647	1706	1587	1611	6958	5518	3685	3.66667	135.333	3.66667	3265.67	1634.67	5387
0.127778	148	130	123	2989	3227	3654	1739	1619	1637	6878	5446	3625	3.83333	133.667	3.83333	3290	1665	5316.33
0.133333	152	136	128	2997	3240	3659	1791	1637	1651	6823	5387	3601	4	138.667	4	3298.67	1693	5270.33
0.138889	153	138	131	3023	3262	3645	1802	1683	1666	6782	5313	3552	4.16667	140.667	4.16667	3310	1717	5215.67
0.144444	152	138	132	3021	3252	3633	1835	1694	1692	6742	5249	3506	4.33333	140.667	4.33333	3302	1740.33	5165.67
0.15	156	135	134	3060	3247	3642	1845	1729	1710	6700	5197	3476	4.5	141.667	4.5	3316.33	1761.33	5124.33
0.155556	162	136	137	3066	3257	3632	1878	1753	1735	6622	5117	3426	4.66667	145	4.66667	3318.33	1788.67	5055
0.161111	163	140	134	3086	3245	3613	1908	1780	1751	6577	5036	3413	4.83333	145.667	4.83333	3314.67	1813	5008.67
0.166667	166	144	137	3107	3225	3602	1942	1794	1770	6523	5000	3353	5	149	5	3311.33	1835.33	4958.67
0.172222	161	147	142	3102	3220	3585	1964	1819	1806	6515	4924	3319	5.16667	150	5.16667	3302.33	1863	4919.33
0.177778	172	148	139	3127	3232	3553	1998	1827	1817	6454	4872	3297	5.33333	153	5.33333	3304	1880.67	4874.33
0.183333	172	144	144	3110	3242	3533	2029	1862	1843	6386	4825	3259	5.5	153.333	5.5	3295	1911.33	4823.33
0.188889	173	153	150	3114	3223	3522	2043	1895	1852	6332	4760	3202	5.66667	158.667	5.66667	3286.33	1930	4764.67
0.194444	181	155	153	3114	3245	3509	2069	1914	1877	6309	4701	3170	5.83333	163	5.83333	3289.33	1953.33	4726.67
0.2	185	152	160	3126	3219	3499	2087	1952	1898	6252	4650	3142	6	165.667	6	3281.33	1979	4681.33
0.205556	187	161	162	3122	3208	3456	2128	1965	1908	6195	4588	3106	6.16667	170	6.16667	3262	2000.33	4629.67
0.211111	191	167	167	3138	3211	3444	2125	2001	1921	6166	4527	3079	6.33333	175	6.33333	3264.33	2015.67	4590.67
0.216667	196	161	178	3132	3191	3433	2147	2007	1934	6101	4483	3050	6.5	178.333	6.5	3252	2029.33	4544.67
0.222222	200	174	182	3114	3183	3422	2168	2025	1941	6014	4426	3003	6.66667	185.333	6.66667	3239.67	2044.67	4481
0.227778	212	179	184	3124	3150	3412	2189	2046	1963	6027	4385	2994	6.83333	191.667	6.83333	3228.67	2066	4468.67
0.233333	211	180	202	3116	3165	3405	2217	2078	1964	5954	4326	2956	7	197.667	7	3228.67	2086.33	4412
0.238889	223	185	205	3116	3153	3386	2216	2098	1982	5926	4285	2906	7.16667	204.333	7.16667	3218.33	2098.67	4372.33
0.244444	228	199	220	3127	3128	3367	2230	2110	2022	5868	4225	2894	7.33333	215.667	7.33333	3207.33	2120.67	4329
0.25	232	203	226	3107	3127	3347	2245	2134	2035	5821	4194	2847	7.5	220.333	7.5	3193.67	2138	4287.33
0.255556	241	204	240	3113	3125	3342	2255	2133	2050	5761	4121	2812	7.66667	228.333	7.66667	3193.33	2146	4231.33
0.261111	251	220	260	3101	3116	3326	2269	2169	2099	5723	4095	2811	7.83333	243.667	7.83333	3181	2179	4209.67
0.266667	256	228	276	3095	3114	3320	2284	2196	2098	5671	4037	2785	8	253.333	8	3176.33	2192.67	4164.33
0.272222	270	237	290	3098	3100	3316	2290	2206	2101	5613	4005	2755	8.16667	265.667	8.16667	3171.33	2199	4124.33
0.277778	282	250	303	3096	3090	3295	2305	2212	2145	5578	3958	2715	8.33333	278.333	8.33333	3160.33	2220.67	4083.67
0.283333	286	259	329	3081	3087	3302	2315	2242	2158	5496	3930	2694	8.5	291.333	8.5	3156.67	2238.33	4040
0.288889	298	268	352	3069	3083	3289	2323	2246	2173	5495	3891	2668	8.66667	306	8.66667	3147	2247.33	4018
0.294444	312	289	378	3081	3069	3275	2337	2276	2176	5423	3843	2670	8.83333	326.333	8.83333	3141.67	2263	3978.67
0.3	327	299	404	3061	3071	3282	2350	2275	2174	5405	3819	2623	9	343.333	9	3138	2266.33	3949
0.305556	335	316	429	3061	3071	3261	2350	2291	2186	5337	3762	2617	9.16667	360	9.16667	3131	2275.67	3905.33
0.311111	359	327	463	3064	3051	3249	2373	2300	2199	5289	3729	2582	9.33333	383	9.33333	3121.33	2290.67	3866.67
0.316667	369	348	488	3049	3044	3248	2375	2309	2241	5250	3691	2563	9.5	401.667	9.5	3113.67	2308.33	3834.67
0.322222	396	365	516	3057	3042	3249	2385	2315	2238	5215	3642	2551	9.66667	425.667	9.66667	3116	2312.67	3802.67
0.327778	399	384	539	3040	3034	3239	2382	2324	2298	5164	3633	2538	9.83333	440.667	9.83333	3104.33	2334.67	3778.33
0.333333	426	408	556	3046	3028	3224	2409	2335	2296	5111	3575	2514	10	463.333	10	3099.33	2346.67	3733.33
0.338889	444	422	599	3036	3029	3223	2413	2346	2294	5075	3562	2486	10.1667	488.333	10.1667	3096	2351	3707.67
0.344444	460	446	620	3043	3032	3226	2423	2349	2296	5038	3515	2469	10.3333	508.667	10.3333	3100.33	2356	3674
0.35	480	456	644	3043	3033	3220	2433	2362	2299	4987	3479	2443	10.5	526.667	10.5	3098.67	2364.67	3636.33
0.355556	498	476	666	3028	3027	3219	2422	2366	2307	4935	3441	2429	10.6667	546.667	10.6667	3091.33	2365	3601.67
0.361111	515	497	691	3021	3012	3217	2435	2386	2324	4888	3409	2411	10.8333	567.667	10.8333	3083.33	2381.67	3569.33
0.366667	535	515	717	3025	3018	3214	2441	2393	2341	4860	3397	2390	11	589	11	3085.67	2391.67	3549
0.372222	545	531	730	3018	3011	3197	2449	2406	2341	4829	3378	2361	11.1667	602	11.1667	3075.33	2398.67	3522.67
0.377778	567	548	745	3012	3004	3200	2451	2395	2371	4780	3338	2365	11.3333	620	11.3333	3072	2405.67	3494.33
0.383333	581	565	768	3009	2999	3194	2455	2425	2366	4754	3293	2337	11.5	638	11.5	3067.33	2415.33	3461.33
0.388889	595	579	774	3008	3000	3195	2462	2429	2364	4714	3271	2313	11.6667	649.333	11.6667	3067.67	2418.33	3432.67
0.394444	611	602	786	3006	2987	3181	2462	2444	2370	4680	3254	2315	11.8333	666.333	11.8333	3058	2425.33	3416.33
0.4	626	606	812	2997	2991	3181	2480	2439	2376	4641	3231	2288	12	681.333	12	3056.33	2431.67	3386.67
0.405556	645	622	827	2995	2991	3168	2486	2446	2390	4585	3189	2268	12.1667	698	12.1667	3051.33	2440.67	3347.33
0.411111	654	636	834	3000	2981	3186	2497	2462	2378	4577	3174	2252	12.3333	708	12.3333	3055.67	2445.67	3334.33
0.416667	676	648	835	2989	2989	3178	2516	2481	2397	4545	3140	2229	12.5	719.667	12.5	3052	2464.67	3304.67
0.422222	686	662	857	2978	2990	3168	2520	2477	2377	4464	3113	2227	12.6667	735	12.6667	3045.33	2458	3268
0.427778	699	672	859	2979	2971	3158	2503	2482	2395	4454	3107	2201	12.8333	743.333	12.8333	3036	2460	3254
0.433333	706	690	859	2994	2983	3154	2526	2479	2407	4398	3065	2188	13	751.667	13	3043.67	2470.67	3217
0.438889	722	700	876	2989	2968	3163	2511	2477	2381	4368	3044	2177	13.1667	766	13.1667	3040	2456.33	3196.33
0.444444	736	709	877	2980	2975	3167	2520	2488	2412	4351	3031	2160	13.3333	774	13.3333	3040.67	2473.33	3180.67
0.45	744	718	884	2969	2982	3162	2559	2517	2398	4323	3009	2147	13.5	782	13.5	3037.67	2491.33	3159.67
0.455556	752	724	893	2964	2968	3157	2542	2490	2425	4287	2980	2121	13.6667	789.667	13.6667	3029.67	2485.67	3129.33
0.461111	759	732	903	2960	2967	3166	2548	2516	2408	4256	2960	2113	13.8333	798	13.8333	3031	2490.67	3109.67
0.466667	777	743	905	2964	2976	3152	2569	2527	2420	4201	2939	2103	14	808.333	14	3030.67	2505.33	3081
0.472222	788	752	909	2947	2961	3139	2542	2546	2430	4178	2935	2082	14.1667	816.333	14.1667	3015.67	2506	3065
0.477778	786	764	915	2953	2954	3137	2561	2527	2419	4136	2896	2058	14.3333	821.667	14.3333	3014.67	2502.33	3030
0.483333	793	767	919	2940	2945	3136	2578	2541	2422	4122	2886	2055	14.5	826.333	14.5	3007	2513.67	3021
0.488889	798	778	940	2934	2962	3139	2548	2528	2425	4071	2866	2048	14.6667	838.667	14.6667	3011.67	2500.33	2995
0.494444	808	788	926	2946	2955	3138	2559	2545	2437	4055	2852	2017	14.8333	840.667	14.8333	3013	2513.67	2974.67
0.5	809	790	935	2952	2957	3133	2590	2550	2430	4031	2821	2019	15	844.667	15	3014	2523.33	2957
0.505556	824	788	940	2941	2947	3127	2596	2539	2423	3970	2817	1990	15.1667	850.667	15.1667	3005	2519.33	2925.67
0.511111	838	798	942	2926	2955	3137	2593	2541	2429	3954	2788	1987	15.3333	859.333	15.3333	3006	2521	2909.67
0.516667	844	807	945	2931	2949	3143	2590	2556	2417	3950	2780	1972	15.5	865.333	15.5	3007.67	2521	2900.67
0.522222	861	800	954	2941	2951	3124	2564	2557	2455	3920	2778	1956	15.6667	871.667	15.6667	3005.33	2525.33	2884.67
0.527778	856	822	960	2928	2945	3129	2583	2552	2445	3889	2765	1944	15.8333	879.333	15.8333	3000.67	2526.67	2866
0.533333	859	818	974	2943	2942	3142	2580	2576	2471	3850	2733	1930	16	883.667	16	3009	2542.33	2837.67
0.538889	869	834	973	2928	2945	3129	2579	2565	2461	3831	2730	1911	16.1667	892	16.1667	3000.67	2535	2824
0.544444	874	835	964	2934	2941	3125	2579	2566	2477	3781	2708	1895	16.3333	891	16.3333	3000	2540.67	2794.67
0.55	885	834	984	2923	2926	3122	2593	2591	2476	3774	2698	1900	16.5	901	16.5	2990.33	2553.33	2790.67
0.555556	901	845	975	2919	2931	3136	2583	2570	2477	3752	2687	1866	16.6667	907	16.6667	2995.33	2543.33	2768.33
0.561111	906	853	977	2914	2933	3112	2590	2580	2488	3735	2670	1864	16.8333	912	16.8333	2986.33	2552.67	2756.33
0.566667	901	856	979	2929	2926	3109	2601	2584	2488	3699	2658	1859	17	912	17	2988	2557.67	2738.67
0.572222	909	868	996	2917	2939	3133	2601	2590	2499	3660	2653	1847	17.1667	924.333	17.1667	2996.33	2563.33	2720
0.577778	929	862	995	2921	2929	3121	2607	2575	2504	3651	2632	1831	17.3333	928.667	17.3333	2990.33	2562	2704.67
0.583333	933	868	995	2922	2935	3123	2620	2580	2490	3617	2620	1830	17.5	932	17.5	2993.33	2563.33	2689
0.588889	946	871	995	2911	2935	3120	2608	2585	2488	3582	2612	1815	17.6667	937.333	17.6667	2988.67	2560.33	2669.67
0.594444	956	880	1016	2910	2928	3107	2596	2586	2503	3570	2598	1802	17.8333	950.667	17.8333	2981.67	2561.67	2656.67
0.6	971	893	1009	2903	2922	3117	2621	2603	2502	3542	2589	1790	18	957.667	18	2980.67	2575.33	2640.33
0.605556	986	898	1008	2906	2923	3108	2620	2603	2478	3524	2579	1785	18.1667	964	18.1667	2979	2567	2629.33
0.611111	1004	904	1012	2906	2922	3098	2630	2606	2499	3514	2567	1757	18.3333	973.333	18.3333	2975.33	2578.33	2612.67
0.616667	1012	905	1009	2902	2921	3100	2619	2599	2527	3478	2559	1759	18.5	975.333	18.5	2974.33	2581.67	2598.67
0.622222	1033	915	1016	2907	2921	3103	2608	2596	2515	3456	2560	1753	18.6667	988	18.6667	2977	2573	2589.67
0.627778	1039	922	1020	2896	2926	3111	2620	2608	2516	3428	2538	1739	18.8333	993.667	18.8333	2977.67	2581.33	2568.33
0.633333	1046	928	1020	2890	2929	3107	2609	2611	2507	3401	2529	1735	19	998	19	2975.33	2575.67	2555
0.638889	1053	938	1039	2896	2916	3097	2632	2618	2513	3389	2532	1717	19.1667	1010	19.1667	2969.67	2587.67	2546
0.644444	1072	936	1033	2900	2916	3087	2622	2611	2518	3379	2509	1705	19.3333	1013.67	19.3333	2967.67	2583.67	2531
0.65	1081	954	1034	2883	2907	3093	2617	2615	2507	3332	2502	1685	19.5	1023	19.5	2961	2579.67	2506.33
0.655556	1101	957	1030	2896	2905	3089	2632	2608	2517	3335	2484	1676	19.6667	1029.33	19.6667	2963.33	2585.67	2498.33
0.661111	1108	966	1038	2899	2909	3106	2640	2618	2515	3299	2477	1681	19.8333	1037.33	19.8333	2971.33	2591	2485.67
0.666667	1126	965	1047	2888	2906	3109	2627	2625	2532	3284	2465	1664	20	1046	20	2967.67	2594.67	2471
0.672222	1133	972	1040	2878	2897	3087	2633	2616	2508	3272	2449	1651	20.1667	1048.33	20.1667	2954	2585.67	2457.33
0.677778	1160	974	1053	2875	2898	3100	2624	2631	2497	3262	2457	1638	20.3333	1062.33	20.3333	2957.67	2584	2452.33
0.683333	1173	977	1049	2892	2906	3092	2643	2624	2526	3213	2428	1632	20.5	1066.33	20.5	2963.33	2597.67	2424.33
0.688889	1178	996	1050	2887	2893	3091	2648	2641	2530	3194	2423	1637	20.6667	1074.67	20.6667	2957	2606.33	2418
0.694444	1190	994	1063	2889	2915	3090	2627	2626	2500	3193	2417	1618	20.8333	1082.33	20.8333	2964.67	2584.33	2409.33
0.7	1192	1000	1070	2867	2903	3084	2619	2626	2526	3171	2402	1602	21	1087.33	21	2951.33	2590.33	2391.67
0.705556	1206	1018	1060	2865	2912	3101	2650	2633	2514	3157	2395	1606	21.1667	1094.67	21.1667	2959.33	2599	2386
0.711111	1230	1019	1069	2871	2910	3087	2650	2656	2519	3140	2387	1587	21.3333	1106	21.3333	2956	2608.33	2371.33
0.716667	1241	1030	1069	2876	2893	3086	2662	2640	2514	3110	2370	1585	21.5	1113.33	21.5	2951.67	2605.33	2355
0.722222	1252	1030	1075	2886	2891	3101	2647	2645	2544	3104	2375	1574	21.6667	1119	21.6667	2959.33	2612	2351
0.727778	1256	1024	1077	2877	2895	3090	2643	2627	2517	3080	2362	1561	21.8333	1119	21.8333	2954	2595.67	2334.33
0.733333	1282	1052	1104	2875	2901	3081	2635	2641	2516	3069	2350	1560	22	1146	22	2952.33	2597.33	2326.33
0.738889	1298	1064	1106	2868	2900	3082	2645	2650	2523	3054	2339	1548	22.1667	1156	22.1667	2950	2606	2313.67
0.744444	1311	1094	1104	2865	2901	3076	2652	2635	2528	3035	2340	1532	22.3333	1169.67	22.3333	2947.33	2605	2302.33
0.75	1316	1092	1115	2864	2896	3091	2645	2641	2508	3009	2324	1537	22.5	1174.33	22.5	2950.33	2598	2290
0.755556	1317	1102	1130	2868	2899	3084	2640	2635	2517	2977	2320	1517	22.6667	1183	22.6667	2950.33	2597.33	2271.33
0.761111	1339	1110	1117	2869	2891	3082	2641	2642	2528	2975	2308	1516	22.8333	1188.67	22.8333	2947.33	2603.67	2266.33
0.766667	1353	1114	1135	2849	2897	3077	2656	2648	2509	2964	2293	1502	23	1200.67	23	2941	2604.33	2253
0.772222	1368	1127	1151	2861	2898	3073	2654	2657	2519	2933	2294	1489	23.1667	1215.33	23.1667	2944	2610	2238.67
0.777778	1377	1116	1154	2865	2895	3083	2656	2647	2512	2919	2289	1495	23.3333	1215.67	23.3333	2947.67	2605	2234.33
0.783333	1402	1132	1159	2875	2894	3069	2639	2653	2502	2917	2277	1480	23.5	1231	23.5	2946	2598	2224.67
0.788889	1407	1130	1180	2861	2884	3076	2654	2666	2532	2893	2255	1477	23.6667	1239	23.6667	2940.33	2617.33	2208.33
0.794444	1440	1136	1184	2848	2892	3073	2630	2651	2526	2870	2253	1470	23.8333	1253.33	23.8333	2937.67	2602.33	2197.67
0.8	1448	1150	1190	2868	2882	3071	2663	2656	2530	2863	2250	1459	24	1262.67	24	2940.33	2616.33	2190.67
0.805556	1480	1161	1186	2862	2881	3072	2675	2673	2535	2848	2236	1447	24.1667	1275.67	24.1667	2938.33	2627.67	2177
0.811111	1480	1174	1187	2853	2894	3068	2659	2645	2546	2832	2230	1434	24.3333	1280.33	24.3333	2938.33	2616.67	2165.33
0.816667	1493	1180	1202	2866	2899	3074	2653	2651	2543	2820	2221	1435	24.5	1291.67	24.5	2946.33	2615.67	2158.67
0.822222	1515	1175	1207	2856	2878	3068	2647	2674	2528	2802	2213	1432	24.6667	1299	24.6667	2934	2616.33	2149
0.827778	1515	1211	1216	2845	2894	3069	2656	2679	2519	2784	2191	1425	24.8333	1314	24.8333	2936	2618	2133.33
0.833333	1526	1224	1222	2859	2894	3051	2656	2648	2544	2788	2192	1415	25	1324	25	2934.67	2616	2131.67
0.838889	1540	1240	1232	2853	2891	3064	2658	2656	2521	2772	2186	1408	25.1667	1337.33	25.1667	2936	2611.67	2122
0.844444	1532	1236	1242	2857	2891	3064	2662	2652	2534	2755	2190	1397	25.3333	1336.67	25.3333	2937.33	2616	2114
0.85	1546	1259	1242	2842	2890	3069	2644	2666	2528	2736	2166	1404	25.5	1349	25.5	2933.67	2612.67	2102
0.855556	1553	1266	1258	2847	2889	3055	2657	2680	2545	2734	2163	1388	25.6667	1359	25.6667	2930.33	2627.33	2095
0.861111	1554	1267	1275	2861	2902	3083	2660	2657	2554	2696	2159	1370	25.8333	1365.33	25.8333	2948.67	2623.67	2075
0.866667	1557	1278	1280	2841	2891	3071	2654	2663	2540	2715	2144	1373	26	1371.67	26	2934.33	2619	2077.33
0.872222	1572	1284	1294	2857	2875	3060	2666	2669	2525	2686	2138	1368	26.1667	1383.33	26.1667	2930.67	2620	2064
0.877778	1562	1282	1294	2842	2887	3058	2666	2695	2518	2686	2132	1362	26.3333	1379.33	26.3333	2929	2626.33	2060
0.883333	1577	1296	1316	2857	2881	3064	2667	2670	2531	2666	2124	1350	26.5	1396.33	26.5	2934	2622.67	2046.67
0.888889	1581	1310	1325	2847	2881	3069	2662	2663	2538	2643	2110	1351	26.6667	1405.33	26.6667	2932.33	2621	2034.67
0.894444	1586	1308	1342	2842	2888	3060	2652	2661	2531	2656	2109	1341	26.8333	1412	26.8333	2930	2614.67	2035.33
0.9	1601	1325	1344	2849	2874	3067	2678	2672	2535	2634	2099	1336	27	1423.33	27	2930	2628.33	2023
0.905556	1595	1339	1353	2851	2893	3055	2666	2697	2528	2624	2084	1335	27.1667	1429	27.1667	2933	2630.33	2014.33
0.911111	1622	1337	1368	2855	2888	3065	2663	2668	2535	2599	2084	1319	27.3333	1442.33	27.3333	2936	2622	2000.67
0.916667	1636	1353	1374	2839	2890	3062	2661	2676	2535	2602	2074	1320	27.5	1454.33	27.5	2930.33	2624	1998.67
0.922222	1646	1355	1394	2841	2873	3059	2671	2651	2541	2587	2074	1318	27.6667	1465	27.6667	2924.33	2621	1993
0.927778	1675	1373	1405	2834	2876	3067	2664	2674	2559	2575	2058	1307	27.8333	1484.33	27.8333	2925.67	2632.33	1980
0.933333	1703	1387	1417	2834	2875	3052	2686	2669	2549	2557	2056	1299	28	1502.33	28	2920.33	2634.67	1970.67
0.938889	1744	1390	1419	2837	2877	3063	2653	2664	2538	2562	2058	1293	28.1667	1517.67	28.1667	2925.67	2618.33	1971
0.944444	1771	1396	1421	2850	2890	3047	2662	2685	2540	2552	2037	1299	28.3333	1529.33	28.3333	2929	2629	1962.67
0.95	1786	1410	1433	2846	2868	3064	2660	2690	2551	2531	2034	1284	28.5	1543	28.5	2926	2633.67	1949.67
				2834	2885	3053	2675	2683	2537	2519	2030	1290	28.6667
				2836	2875	3058	2681	2660	2550	2520	2016	1274	28.8333
				2832	2887	3058	2672	2669	2552	2498	2011	1272	29
				2834	2883	3053	2666	2669	2553				29.1667
				2838	2881	3059	2667	2681	2554				29.3333
				2839	2871	3046	2651	2679	2549				29.5
				2848	2868	3058	2666	2690	2565				29.6667
				2836	2887	3057	2672	2662	2539				29.8333
				2843	2874	3055	2678	2663	2547				30
				2827	2881	3032	2670	2676	2556				30.1667
				2837	2877	3050	2674	2682	2548				30.3333
				2833	2875	3060	2690	2708	2559				30.5
				2830	2872	3046	2673	2679	2533				30.6667
				2830	2871	3061	2681	2700	2566				30.8333
				2830	2874	3054	2673	2687	2563				31
				2834	2874	3053	2655	2687	2542				31.1667
				2829	2866	3056	2673	2690	2555				31.3333
				2831	2867	3041	2682	2698	2550				31.5
				2833	2879	3043	2683	2690	2563				31.6667
				2819	2865	3049	2690	2694	2563				31.8333
				2822	2868	3052	2659	2693	2571				32
				2829	2868	3048							32.1667
				2830	2871	3036							32.3333
				2825	2858	3036							32.5
				2827	2858	3040							32.6667
				2828	2859	3035							32.8333
				2819	2864	3043							33
				2810	2855	3043							33.1667
				2834	2866	3024							33.3333
				2817	2859	3044							33.5
				2814	2868	3048							33.6667
				2820	2878	3036							33.8333
				2819	2854	3036							34
				2808	2859	3026							34.1667
				2813	2848	3030							34.3333
				2817	2859	3025							34.5
				2825	2854	3035							34.6667
				2820	2863	3032							34.8333
				2812	2851	3029							35
				2797	2859	3040							35.1667
				2806	2866	3030							35.3333
				2809	2859	3027							35.5
				2817	2854	3036							35.6667
				2808	2865	3036							35.8333
				2803	2848	3011							36
				2803	2859	3020							36.1667
				2805	2849	3034							36.3333
				2801	2858	3010							36.5
				2806	2851	3013							36.6667
				2804	2854	3016							36.8333
				2802	2856	3021							37
				2797	2859	3023							37.1667
				2799	2859	3018							37.3333
				2806	2857	3026							37.5
				2801	2839	3024							37.6667
				2808	2850	3028							37.8333
				2795	2852	3013							38
				2799	2856	3022							38.1667
				2804	2858	3023							38.3333
				2806	2843	3022							38.5
				2789	2852	3005							38.6667
				2796	2853	3007							38.8333
				2789	2840	3004							39
				2775	2831	3007							39.1667
				2782	2832	3004							39.3333
				2791	2827	2999							39.5
				2773	2836	2995							39.6667
				2782	2829	2989							39.8333
				2789	2840	2987							40
				2781	2833	3000							40.1667
				2776	2832	2999							40.3333
				2768	2834	2996							40.5
				2771	2833	2996							40.6667
				2783	2824	2988							40.8333
				2766	2826	2983							41
				2770	2820	2986							41.1667
				2770	2824	2981							41.3333
				2770	2828	2978							41.5
				2775	2816	2983							41.6667
				2767	2823	2986							41.8333
				2762	2831	2991							42
				2768	2828	2982							42.1667
				2762	2827	2971							42.3333
				2769	2815	2985							42.5
				2763	2830	2983							42.6667
				2776	2824	2991							42.8333
				2772	2834	2984							43
				2779	2821	2971							43.1667
				2773	2821	2974							43.3333
				2768	2829	2975							43.5
				2772	2819	2980							43.6667
				2779	2818	2971							43.8333
				2763	2815	2976							44

## Sheet: PSMa4
0.25 mg/mL PSMα4 monomers in the absence and presence of seeds of the other PSM peptides
Raw data																Averaged data
Time (h)	Unseeded	Unseeded	Unseeded	PSMα1 seeds	PSMα1 seeds	PSMα1 seeds	PSMα3 seeds	PSMα3 seeds	PSMα3 seeds	PSMβ1 seeds	PSMβ1 seeds	PSMβ1 seeds	PSMβ2 seeds	PSMβ2 seeds	PSMβ2 seeds	Time (h)	Unseeded	PSMα1 seeds	PSMα3 seeds	PSMβ1 seeds	PSMβ2 seeds
0	252	250	264	1427	1853	1292	377	306	396	928	896	909	673	681	536	0	255.333	1524	359.667	911	630
0.166667	241	244	253	899	1227	827	306	254	319	828	811	818	486	485	388	0.166667	246	984.333	293	819	453
0.333333	243	245	251	764	1024	729	293	251	305	813	807	815	430	429	353	0.333333	246.333	839	283	811.667	404
0.5	241	245	252	715	908	713	293	264	300	852	834	858	408	393	350	0.5	246	778.667	285.667	848	383.667
0.666667	245	247	256	722	878	740	297	269	298	949	898	930	411	324	352	0.666667	249.333	780	288	925.667	362.333
0.833333	247	250	261	742	885	774	298	274	299	1018	957	980	423	313	361	0.833333	252.667	800.333	290.333	985	365.667
1	252	251	263	757	904	806	304	281	298	1059	1010	1039	432	345	365	1	255.333	822.333	294.333	1036	380.667
1.16667	259	257	265	789	940	831	304	289	297	1116	1060	1069	437	383	373	1.16667	260.333	853.333	296.667	1081.67	397.667
1.33333	264	263	272	804	962	858	312	298	303	1148	1089	1110	442	403	383	1.33333	266.333	874.667	304.333	1115.67	409.333
1.5	266	264	275	826	991	883	317	303	305	1188	1131	1138	448	421	384	1.5	268.333	900	308.333	1152.33	417.667
1.66667	274	267	278	837	1014	905	321	302	308	1207	1158	1177	456	437	390	1.66667	273	918.667	310.333	1180.67	427.667
1.83333	274	273	282	849	1029	918	322	314	299	1245	1190	1196	458	444	392	1.83333	276.333	932	311.667	1210.33	431.333
2	280	273	280	870	1051	935	323	310	314	1265	1197	1227	462	457	402	2	277.667	952	315.667	1229.67	440.333
2.16667	281	278	285	876	1065	942	331	314	313	1282	1226	1248	468	458	406	2.16667	281.333	961	319.333	1252	444
2.33333	281	279	286	884	1073	958	327	321	313	1297	1257	1261	470	471	406	2.33333	282	971.667	320.333	1271.67	449
2.5	285	282	286	894	1090	966	330	319	314	1337	1271	1283	471	477	411	2.5	284.333	983.333	321	1297	453
2.66667	284	285	288	903	1104	970	337	324	317	1341	1287	1303	478	484	416	2.66667	285.667	992.333	326	1310.33	459.333
2.83333	288	288	293	915	1111	986	341	326	321	1365	1294	1312	482	488	416	2.83333	289.667	1004	329.333	1323.67	462
3	286	288	292	925	1124	991	344	328	323	1368	1308	1322	482	491	417	3	288.667	1013.33	331.667	1332.67	463.333
3.16667	292	289	298	924	1131	995	339	332	323	1382	1330	1342	488	499	427	3.16667	293	1016.67	331.333	1351.33	471.333
3.33333	292	293	298	930	1146	1001	343	333	322	1394	1336	1342	488	506	427	3.33333	294.333	1025.67	332.667	1357.33	473.667
3.5	292	292	300	937	1145	1013	345	335	328	1401	1345	1356	491	504	429	3.5	294.667	1031.67	336	1367.33	474.667
3.66667	290	293	300	936	1160	1012	347	338	323	1402	1354	1371	491	510	429	3.66667	294.333	1036	336	1375.67	476.667
3.83333	295	291	298	944	1167	1029	352	341	329	1404	1357	1395	495	513	434	3.83333	294.667	1046.67	340.667	1385.33	480.667
4	295	299	301	954	1171	1025	351	347	331	1418	1364	1384	496	515	443	4	298.333	1050	343	1388.67	484.667
4.16667	296	300	303	960	1172	1025	358	348	331	1426	1371	1395	494	513	441	4.16667	299.667	1052.33	345.667	1397.33	482.667
4.33333	300	299	306	962	1188	1033	352	345	332	1421	1377	1404	501	521	448	4.33333	301.667	1061	343	1400.67	490
4.5	300	297	306	968	1188	1036	359	347	332	1441	1380	1411	501	527	447	4.5	301	1064	346	1410.67	491.667
4.66667	304	301	306	978	1193	1039	359	351	338	1446	1385	1411	505	531	449	4.66667	303.667	1070	349.333	1414	495
4.83333	304	301	306	980	1193	1054	365	353	337	1467	1405	1416	504	530	448	4.83333	303.667	1075.67	351.667	1429.33	494
5	303	300	313	984	1203	1048	366	356	339	1457	1405	1433	510	533	453	5	305.333	1078.33	353.667	1431.67	498.667
5.16667	305	305	314	978	1211	1053	367	357	342	1465	1404	1452	512	535	454	5.16667	308	1080.67	355.333	1440.33	500.333
5.33333	304	303	309	986	1215	1055	370	358	339	1475	1425	1436	514	533	456	5.33333	305.333	1085.33	355.667	1445.33	501
5.5	306	303	311	996	1219	1061	371	357	339	1475	1429	1460	515	540	458	5.5	306.667	1092	355.667	1454.67	504.333
5.66667	311	307	311	992	1222	1062	370	363	340	1487	1443	1465	521	540	462	5.66667	309.667	1092	357.667	1465	507.667
5.83333	307	310	316	999	1230	1074	375	364	342	1498	1434	1467	520	545	465	5.83333	311	1101	360.333	1466.33	510
6	312	309	313	1002	1227	1072	369	367	342	1509	1436	1467	519	545	466	6	311.333	1100.33	359.333	1470.67	510
6.16667	310	307	321	1004	1240	1072	378	369	347	1515	1461	1475	522	547	465	6.16667	312.667	1105.33	364.667	1483.67	511.333
6.33333	312	310	318	1009	1238	1074	377	365	345	1516	1461	1469	524	550	470	6.33333	313.333	1107	362.333	1482	514.667
6.5	310	312	320	1010	1242	1081	380	369	348	1524	1472	1479	522	549	466	6.5	314	1111	365.667	1491.67	512.333
6.66667	315	309	322	1015	1246	1087	381	370	347	1535	1479	1487	527	548	466	6.66667	315.333	1116	366	1500.33	513.667
6.83333	313	311	323	1021	1252	1086	383	369	352	1541	1487	1494	530	552	474	6.83333	315.667	1119.67	368	1507.33	518.667
7	317	316	327	1019	1260	1091	383	372	348	1539	1494	1501	528	556	476	7	320	1123.33	367.667	1511.33	520
7.16667	318	316	323	1026	1255	1098	387	373	352	1547	1489	1505	532	561	480	7.16667	319	1126.33	370.667	1513.67	524.333
7.33333	322	316	328	1032	1273	1101	386	376	351	1550	1500	1508	530	554	480	7.33333	322	1135.33	371	1519.33	521.333
7.5	316	318	324	1031	1266	1103	389	377	354	1570	1501	1522	534	556	479	7.5	319.333	1133.33	373.333	1531	523
7.66667	321	317	327	1038	1266	1106	385	381	355	1564	1516	1520	538	561	480	7.66667	321.667	1136.67	373.667	1533.33	526.333
7.83333	320	317	330	1040	1275	1117	388	382	355	1566	1515	1515	540	563	483	7.83333	322.333	1144	375	1532	528.667
8	321	321	328	1043	1276	1113	392	385	355	1586	1538	1536	540	562	484	8	323.333	1144	377.333	1553.33	528.667
8.16667	322	324	327	1046	1283	1122	392	387	356	1588	1531	1535	542	564	485	8.16667	324.333	1150.33	378.333	1551.33	530.333
8.33333	328	323	329	1053	1285	1125	393	389	363	1598	1543	1519	547	564	485	8.33333	326.667	1154.33	381.667	1553.33	532
8.5	325	324	328	1050	1296	1129	395	389	360	1608	1554	1538	548	566	495	8.5	325.667	1158.33	381.333	1566.67	536.333
8.66667	326	321	336	1058	1297	1125	397	388	358	1608	1553	1530	545	572	491	8.66667	327.667	1160	381	1563.67	536
8.83333	319	329	331	1059	1299	1132	394	390	359	1611	1553	1549	547	568	491	8.83333	326.333	1163.33	381	1571	535.333
9	327	326	334	1060	1296	1128	397	390	362	1614	1565	1554	551	570	496	9	329	1161.33	383	1577.67	539
9.16667	329	327	340	1065	1302	1141	401	391	366	1633	1573	1554	551	570	489	9.16667	332	1169.33	386	1586.67	536.667
9.33333	327	323	336	1070	1312	1146	403	392	365	1630	1573	1556	548	573	497	9.33333	328.667	1176	386.667	1586.33	539.333
9.5	326	330	335	1074	1304	1150	405	395	369	1640	1571	1561	548	576	498	9.5	330.333	1176	389.667	1590.67	540.667
9.66667	333	329	341	1082	1307	1149	404	401	369	1632	1575	1564	553	574	496	9.66667	334.333	1179.33	391.333	1590.33	541
9.83333	333	333	340	1083	1308	1153	410	397	368	1656	1591	1573	553	574	500	9.83333	335.333	1181.33	391.667	1606.67	542.333
10	332	329	339	1078	1305	1153	408	402	367	1654	1589	1570	556	579	496	10	333.333	1178.67	392.333	1604.33	543.667
10.1667	331	329	342	1091	1312	1160	412	402	368	1656	1592	1578	554	576	503	10.1667	334	1187.67	394	1608.67	544.333
10.3333	334	333	336	1085	1320	1148	410	404	371	1647	1594	1585	557	580	499	10.3333	334.333	1184.33	395	1608.67	545.333
10.5	332	331	346	1093	1315	1158	418	406	371	1652	1593	1595	562	584	507	10.5	336.333	1188.67	398.333	1613.33	551
10.6667	335	332	341	1094	1326	1153	413	406	373	1671	1590	1604	561	583	506	10.6667	336	1191	397.333	1621.67	550
10.8333	332	332	339	1093	1327	1166	416	408	371	1677	1592	1603	561	578	505	10.8333	334.333	1195.33	398.333	1624	548
11	334	331	346	1097	1331	1170	419	409	380	1670	1620	1593	564	585	512	11	337	1199.33	402.667	1627.67	553.667
11.1667	336	337	347	1106	1343	1166	418	415	377	1681	1609	1625	566	585	507	11.1667	340	1205	403.333	1638.33	552.667
11.3333	338	338	345	1104	1339	1171	420	412	379	1675	1611	1609	571	589	512	11.3333	340.333	1204.67	403.667	1631.67	557.333
11.5	338	337	346	1106	1342	1177	421	413	377	1686	1629	1615	567	595	512	11.5	340.333	1208.33	403.667	1643.33	558
11.6667	337	338	351	1112	1340	1182	419	419	376	1703	1624	1602	567	589	512	11.6667	342	1211.33	404.667	1643	556
11.8333	338	339	349	1114	1346	1185	421	414	377	1693	1640	1615	573	596	514	11.8333	342	1215	404	1649.33	561
12	341	341	350	1115	1346	1185	416	413	383	1693	1628	1619	571	591	518	12	344	1215.33	404	1646.67	560
12.1667	340	336	350	1125	1354	1193	424	420	380	1709	1633	1630	568	596	516	12.1667	342	1224	408	1657.33	560
12.3333	343	338	354	1133	1363	1186	424	416	382	1718	1631	1631	571	595	514	12.3333	345	1227.33	407.333	1660	560
12.5	342	341	351	1136	1360	1190	424	420	385	1703	1646	1618	574	593	515	12.5	344.667	1228.67	409.667	1655.67	560.667
12.6667	342	341	354	1129	1359	1195	430	421	381	1714	1651	1628	579	595	520	12.6667	345.667	1227.67	410.667	1664.33	564.667
12.8333	343	339	348	1143	1374	1198	427	421	383	1717	1656	1637	579	600	521	12.8333	343.333	1238.33	410.333	1670	566.667
13	346	345	350	1141	1366	1206	425	426	380	1725	1659	1639	574	601	523	13	347	1237.67	410.333	1674.33	566
13.1667	347	344	354	1140	1365	1204	434	425	386	1718	1661	1639	578	601	520	13.1667	348.333	1236.33	415	1672.67	566.333
13.3333	344	345	356	1142	1377	1202	433	425	387	1736	1659	1652	580	607	520	13.3333	348.333	1240.33	415	1682.33	569
13.5	344	345	354	1142	1371	1212	430	427	384	1744	1682	1643	580	605	523	13.5	347.667	1241.67	413.667	1689.67	569.333
13.6667	345	349	360	1148	1382	1208	429	425	389	1739	1663	1651	581	604	523	13.6667	351.333	1246	414.333	1684.33	569.333
13.8333	348	346	357	1151	1387	1216	432	423	389	1749	1668	1660	580	602	525	13.8333	350.333	1251.33	414.667	1692.33	569
14	348	351	356	1147	1387	1214	431	426	390	1740	1697	1651	585	605	525	14	351.667	1249.33	415.667	1696	571.667
14.1667	346	350	357	1154	1382	1222	435	426	392	1747	1678	1659	582	612	527	14.1667	351	1252.67	417.667	1694.67	573.667
14.3333	350	349	360	1155	1381	1228	438	433	389	1743	1689	1671	580	606	528	14.3333	353	1254.67	420	1701	571.333
14.5	353	351	362	1158	1381	1219	438	433	393	1738	1685	1670	583	610	529	14.5	355.333	1252.67	421.333	1697.67	574
14.6667	355	351	360	1162	1393	1232	434	435	395	1747	1687	1662	589	608	527	14.6667	355.333	1262.33	421.333	1698.67	574.667
14.8333	352	351	360	1161	1387	1228	440	440	391	1767	1692	1674	589	619	534	14.8333	354.333	1258.67	423.667	1711	580.667
15	350	351	361	1162	1393	1227	438	432	390	1763	1696	1671	588	612	529	15	354	1260.67	420	1710	576.333
15.1667	351	352	362	1169	1401	1241	438	433	395	1765	1707	1660	588	613	531	15.1667	355	1270.33	422	1710.67	577.333
15.3333	354	351	364	1172	1402	1239	441	437	397	1757	1701	1676	590	618	536	15.3333	356.333	1271	425	1711.33	581.333
15.5	356	353	364	1167	1408	1237	442	440	392	1764	1709	1670	593	619	534	15.5	357.667	1270.67	424.667	1714.33	582
15.6667	357	351	366	1173	1408	1244	442	437	397	1756	1693	1674	591	616	533	15.6667	358	1275	425.333	1707.67	580
15.8333	355	353	365	1176	1413	1247	447	441	394	1774	1714	1681	587	618	538	15.8333	357.667	1278.67	427.333	1723	581
16	358	356	365	1180	1406	1246	443	441	399	1782	1704	1680	596	620	537	16	359.667	1277.33	427.667	1722	584.333
16.1667	358	355	368	1179	1409	1250	443	441	400	1776	1710	1691	602	621	539	16.1667	360.333	1279.33	428	1725.67	587.333
16.3333	360	358	366	1188	1410	1252	443	446	400	1780	1705	1691	596	621	539	16.3333	361.333	1283.33	429.667	1725.33	585.333
16.5	357	361	370	1187	1419	1258	447	443	406	1778	1702	1694	595	619	538	16.5	362.667	1288	432	1724.67	584
16.6667	360	363	369	1190	1416	1257	449	445	404	1785	1718	1678	594	621	540	16.6667	364	1287.67	432.667	1727	585
16.8333	356	358	371	1191	1420	1254	447	449	404	1786	1715	1688	600	621	545	16.8333	361.667	1288.33	433.333	1729.67	588.667
17	361	360	372	1193	1422	1264	450	448	398	1803	1719	1706	596	618	538	17	364.333	1293	432	1742.67	584
17.1667	359	356	367	1196	1428	1265	452	447	403	1800	1720	1711	599	624	537	17.1667	360.667	1296.33	434	1743.67	586.667
17.3333	361	360	371	1189	1425	1266	449	448	404	1781	1730	1697	599	626	542	17.3333	364	1293.33	433.667	1736	589
17.5	361	364	372	1199	1421	1261	457	447	405	1794	1725	1699	601	623	541	17.5	365.667	1293.67	436.333	1739.33	588.333
17.6667	362	363	373	1195	1432	1267	451	448	405	1789	1726	1706	598	626	543	17.6667	366	1298	434.667	1740.33	589
17.8333	365	360	373	1198	1428	1267	453	451	402	1801	1720	1705	608	626	545	17.8333	366	1297.67	435.333	1742	593
18	364	362	372	1202	1436	1282	450	451	406	1798	1726	1712	605	620	544	18	366	1306.67	435.667	1745.33	589.667
18.1667	362	358	375	1207	1439	1276	455	455	405	1793	1747	1708	608	629	548	18.1667	365	1307.33	438.333	1749.33	595
18.3333	367	362	374	1204	1441	1290	459	453	409	1794	1752	1711	608	634	549	18.3333	367.667	1311.67	440.333	1752.33	597
18.5	366	363	374	1209	1440	1272	453	456	407	1811	1727	1717	610	631	543	18.5	367.667	1307	438.667	1751.67	594.667
18.6667	365	363	373	1207	1447	1280	456	453	408	1803	1735	1732	612	633	551	18.6667	367	1311.33	439	1756.67	598.667
18.8333	368	365	373	1211	1441	1287	459	456	416	1807	1742	1730	608	629	554	18.8333	368.667	1313	443.667	1759.67	597
19	371	365	376	1214	1462	1283	460	460	413	1814	1746	1719	607	636	556	19	370.667	1319.67	444.333	1759.67	599.667
19.1667	368	365	376	1215	1455	1287	459	462	412	1814	1759	1728	608	634	554	19.1667	369.667	1319	444.333	1767	598.667
19.3333	369	365	376	1225	1448	1292	467	457	412	1834	1741	1725	615	638	547	19.3333	370	1321.67	445.333	1766.67	600
19.5	370	369	377	1216	1452	1289	463	462	414	1825	1761	1720	614	634	556	19.5	372	1319	446.333	1768.67	601.333
19.6667	367	367	383	1222	1462	1299	464	457	410	1819	1757	1740	613	636	552	19.6667	372.333	1327.67	443.667	1772	600.333
19.8333	368	369	380	1222	1453	1299	457	461	415	1822	1760	1751	616	638	555	19.8333	372.333	1324.67	444.333	1777.67	603
20	370	369	377	1216	1461	1301	459	462	415	1834	1774	1723	616	638	555	20	372	1326	445.333	1777	603
20.1667	371	367	381	1224	1460	1300	467	462	413	1825	1755	1749	618	639	559	20.1667	373	1328	447.333	1776.33	605.333
20.3333	370	371	381	1225	1464	1304	460	462	412	1840	1776	1747	620	637	554	20.3333	374	1331	444.667	1787.67	603.667
20.5	374	372	381	1231	1478	1303	467	463	415	1841	1773	1742	614	646	559	20.5	375.667	1337.33	448.333	1785.33	606.333
20.6667	370	370	383	1235	1467	1303	463	464	418	1830	1753	1739	620	642	555	20.6667	374.333	1335	448.333	1774	605.667
20.8333	375	373	384	1238	1477	1308	465	462	415	1827	1787	1742	623	643	555	20.8333	377.333	1341	447.333	1785.33	607
21	375	369	384	1237	1479	1309	469	466	424	1838	1783	1759	622	644	559	21	376	1341.67	453	1793.33	608.333
21.1667	378	372	380	1235	1483	1304	471	468	420	1844	1769	1750	623	641	558	21.1667	376.667	1340.67	453	1787.67	607.333
21.3333	372	371	383	1239	1479	1314	467	466	422	1855	1779	1748	625	645	557	21.3333	375.333	1344	451.667	1794	609
21.5	373	370	383	1237	1477	1313	470	467	425	1844	1786	1737	621	646	565	21.5	375.333	1342.33	454	1789	610.667
21.6667	377	376	383	1240	1478	1321	472	472	418	1844	1788	1769	624	651	555	21.6667	378.667	1346.33	454	1800.33	610
21.8333	376	374	390	1239	1485	1322	467	467	425	1850	1802	1752	623	650	562	21.8333	380	1348.67	453	1801.33	611.667
22	378	373	385	1243	1489	1318	469	469	417	1849	1794	1766	623	645	563	22	378.667	1350	451.667	1803	610.333
22.1667	376	373	387	1243	1483	1327	471	476	422	1853	1792	1760	630	651	565	22.1667	378.667	1351	456.333	1801.67	615.333
22.3333	380	376	385	1251	1492	1332	474	475	422	1859	1808	1774	625	652	570	22.3333	380.333	1358.33	457	1813.67	615.667
22.5	382	374	386	1249	1492	1326	475	476	423	1844	1808	1772	626	649	567	22.5	380.667	1355.67	458	1808	614
22.6667	379	376	386	1251	1497	1332	472	473	422	1869	1802	1778	628	651	571	22.6667	380.333	1360	455.667	1816.33	616.667
22.8333	378	379	383	1259	1494	1334	470	472	425	1858	1810	1768	632	653	566	22.8333	380	1362.33	455.667	1812	617
23	381	378	393	1259	1494	1329	475	475	425	1858	1817	1779	629	653	569	23	384	1360.67	458.333	1818	617
23.1667	382	376	392	1255	1496	1335	473	477	426	1856	1808	1783	635	652	574	23.1667	383.333	1362	458.667	1815.67	620.333
23.3333	382	377	389	1260	1502	1331	478	476	423	1875	1813	1788	631	651	569	23.3333	382.667	1364.33	459	1825.33	617
23.5	385	379	391	1257	1515	1339	479	475	425	1873	1811	1782	631	658	574	23.5	385	1370.33	459.667	1822	621
23.6667	381	380	391	1260	1511	1335	480	480	432	1868	1829	1800	633	658	571	23.6667	384	1368.67	464	1832.33	620.667
23.8333	386	382	388	1266	1506	1337	482	481	435	1875	1815	1785	638	655	570	23.8333	385.333	1369.67	466	1825	621
24	383	384	389	1268	1510	1348	483	480	432	1862	1821	1800	637	653	573	24	385.333	1375.33	465	1827.67	621
24.1667	385	382	391	1267	1511	1339	483	480	428	1882	1830	1791	638	658	573	24.1667	386	1372.33	463.667	1834.33	623
24.3333	385	388	395	1264	1517	1342	479	477	432	1878	1842	1800	637	657	572	24.3333	389.333	1374.33	462.667	1840	622
24.5	386	383	389	1272	1514	1341	483	480	431	1888	1835	1805	635	657	580	24.5	386	1375.67	464.667	1842.67	624
24.6667	384	380	394	1277	1527	1346	481	480	438	1889	1845	1818	636	667	576	24.6667	386	1383.33	466.333	1850.67	626.333
24.8333	389	382	396	1273	1522	1346	483	486	436	1888	1836	1815	640	660	574	24.8333	389	1380.33	468.333	1846.33	624.667
25	386	386	396	1265	1519	1356	485	485	436	1898	1848	1818	640	661	575	25	389.333	1380	468.667	1854.67	625.333
25.1667	385	384	395	1270	1522	1354	488	483	436	1886	1852	1809	636	665	581	25.1667	388	1382	469	1849	627.333
25.3333	385	385	401	1277	1520	1361	486	480	437	1888	1841	1809	643	660	575	25.3333	390.333	1386	467.667	1846	626
25.5	388	383	398	1282	1527	1354	480	480	436	1892	1856	1817	645	666	578	25.5	389.667	1387.67	465.333	1855	629.667
25.6667	388	384	394	1277	1523	1356	485	487	436	1893	1854	1831	640	669	578	25.6667	388.667	1385.33	469.333	1859.33	629
25.8333	388	385	395	1278	1531	1360	483	491	439	1914	1866	1834	643	666	579	25.8333	389.333	1389.67	471	1871.33	629.333
26	390	384	398	1285	1531	1361	488	487	440	1902	1866	1843	642	669	581	26	390.667	1392.33	471.667	1870.33	630.667
26.1667	388	383	395	1282	1526	1364	486	492	438	1907	1859	1826	646	667	586	26.1667	388.667	1390.67	472	1864	633
26.3333	395	386	401	1283	1531	1361	492	494	436	1914	1871	1833	647	666	585	26.3333	394	1391.67	474	1872.67	632.667
26.5	391	390	400	1288	1537	1360	493	489	438	1894	1871	1837	646	670	580	26.5	393.667	1395	473.333	1867.33	632
26.6667	388	391	403	1291	1546	1370	495	494	443	1903	1880	1836	648	666	581	26.6667	394	1402.33	477.333	1873	631.667
26.8333	392	386	401	1294	1542	1369	489	496	443	1908	1871	1845	646	672	586	26.8333	393	1401.67	476	1874.67	634.667
27	390	387	404	1292	1539	1367	495	494	439	1909	1887	1842	649	671	588	27	393.667	1399.33	476	1879.33	636
27.1667	389	391	404	1293	1544	1375	493	493	445	1919	1891	1838	646	672	583	27.1667	394.667	1404	477	1882.67	633.667
27.3333	394	390	405	1292	1547	1371	496	495	445	1918	1883	1862	653	671	584	27.3333	396.333	1403.33	478.667	1887.67	636
27.5	392	390	400	1296	1549	1368	495	497	439	1924	1902	1843	660	669	587	27.5	394	1404.33	477	1889.67	638.667
27.6667	395	392	405	1298	1549	1383	497	493	442	1930	1888	1863	646	677	584	27.6667	397.333	1410	477.333	1893.67	635.667
27.8333	393	392	408	1295	1551	1376	493	496	447	1935	1909	1861	652	676	590	27.8333	397.667	1407.33	478.667	1901.67	639.333
28	395	394	406	1301	1552	1379	498	501	447	1940	1902	1860	648	670	591	28	398.333	1410.67	482	1900.67	636.333
28.1667	396	396	405	1300	1546	1380	497	498	449	1948	1913	1857	654	675	590	28.1667	399	1408.67	481.333	1906	639.667
28.3333	400	394	407	1301	1553	1376	499	500	445	1931	1905	1876	655	675	593	28.3333	400.333	1410	481.333	1904	641
28.5	397	391	410	1304	1554	1377	499	503	441	1939	1903	1883	660	674	594	28.5	399.333	1411.67	481	1908.33	642.667
28.6667	401	400	408	1304	1557	1387	496	498	447	1939	1916	1879	656	682	595	28.6667	403	1416	480.333	1911.33	644.333
28.8333	401	394	405	1308	1552	1376	501	502	449	1938	1916	1872	657	676	595	28.8333	400	1412	484	1908.67	642.667
29	397	396	406	1310	1560	1375	497	501	446	1941	1934	1876	656	675	591	29	399.667	1415	481.333	1917	640.667
29.1667	400	403	409	1312	1557	1391	504	502	449	1954	1923	1895				29.1667	404	1420	485	1924
29.3333	401	401	411	1308	1563	1396	499	502	452	1953	1940	1876				29.3333	404.333	1422.33	484.333	1923
29.5	403	396	410	1306	1573	1390	507	502	452	1959	1937	1892				29.5	403	1423	487	1929.33
29.6667	403	399	408	1312	1565	1395	502	508	453	1953	1935	1888				29.6667	403.333	1424	487.667	1925.33
29.8333	404	403	412	1313	1570	1394	501	503	449	1955	1962	1894				29.8333	406.333	1425.67	484.333	1937
30	401	404	409	1316	1573	1399	505	508	456	1962	1934	1900				30	404.667	1429.33	489.667	1932
30.1667	404	401	408	1314	1566	1392	505	511	455	1963	1954	1906				30.1667	404.333	1424	490.333	1941
30.3333	407	404	413	1320	1571	1403	504	503	455	1958	1946	1911				30.3333	408	1431.33	487.333	1938.33
30.5	407	400	415	1317	1567	1392	507	508	456	1945	1942	1902				30.5	407.333	1425.33	490.333	1929.67
30.6667	403	399	413	1317	1578	1402	502	508	453	1969	1951	1911				30.6667	405	1432.33	487.667	1943.67
30.8333	401	406	418	1327	1578	1410	506	505	457	1976	1966	1931				30.8333	408.333	1438.33	489.333	1957.67
31	404	410	415	1318	1573	1403	504	509	451	1966	1969	1907				31	409.667	1431.33	488	1947.33
31.1667	406	403	419	1311	1585	1412	509	513	461	1980	1982	1920				31.1667	409.333	1436	494.333	1960.67
31.3333	409	403	414	1324	1580	1410	509	510	457	1994	1972	1928				31.3333	408.667	1438	492	1964.67
31.5	408	408	415	1326	1580	1411	507	512	461	1975	1983	1930				31.5	410.333	1439	493.333	1962.67
31.6667	407	406	419	1322	1580	1412	508	514	452	1983	1974	1927				31.6667	410.667	1438	491.333	1961.33
31.8333	407	406	422	1326	1587	1413	506	514	452	1987	1974	1937				31.8333	411.667	1442	490.667	1966
32	409	411	420	1333	1584	1414	514	516	462	1977	1993	1940				32	413.333	1443.67	497.333	1970
32.1667	408	406	413	1324	1590	1414	512	517	461							32.1667	409	1442.67	496.667
32.3333	414	409	417	1333	1588	1420										32.3333	413.333	1447
32.5	413	411	420	1326	1590	1423										32.5	414.667	1446.33
32.6667	410	403	417	1328	1592	1416										32.6667	410	1445.33
32.8333	413	413	419	1338	1594	1423										32.8333	415	1451.67
33	415	412	419	1338	1595	1421										33	415.333	1451.33
33.1667	414	410	421	1338	1603	1416										33.1667	415	1452.33
33.3333	411	410	422	1339	1600	1424										33.3333	414.333	1454.33
33.5	414	411	421	1336	1604	1427										33.5	415.333	1455.67
33.6667	411	409	419	1341	1608	1428										33.6667	413	1459
33.8333	413	412	424	1341	1604	1428										33.8333	416.333	1457.67
34	416	414	422	1335	1608	1428										34	417.333	1457
34.1667	413	413	426	1348	1607	1434										34.1667	417.333	1463
34.3333	415	410	421	1338	1607	1436										34.3333	415.333	1460.33
34.5	419	412	423	1347	1622	1436										34.5	418	1468.33
34.6667	418	413	422	1347	1619	1433										34.6667	417.667	1466.33
34.8333	418	416	428	1347	1615	1433										34.8333	420.667	1465
35	419	406	428	1356	1618	1443										35	417.667	1472.33
35.1667	421	415	426	1351	1615	1438										35.1667	420.667	1468
35.3333	415	417	429	1351	1622	1441										35.3333	420.333	1471.33
35.5	420	421	425	1340	1627	1437										35.5	422	1468
35.6667	418	414	431	1348	1619	1437										35.6667	421	1468
35.8333	424	423	434	1364	1628	1449										35.8333	427	1480.33
36	424	420	430	1354	1622	1447										36	424.667	1474.33
36.1667	421	417	429	1362	1620	1445										36.1667	422.333	1475.67
36.3333	422	420	434	1363	1629	1447										36.3333	425.333	1479.67
36.5	415	416	426	1354	1620	1447										36.5	419	1473.67
36.6667	421	421	432	1353	1636	1454										36.6667	424.667	1481
36.8333	423	424	436	1364	1629	1454										36.8333	427.667	1482.33
37	424	424	435	1363	1637	1462										37	427.667	1487.33
37.1667	428	422	434	1365	1636	1461										37.1667	428	1487.33
37.3333	425	424	433	1375	1635	1463										37.3333	427.333	1491
37.5	427	424	436	1372	1647	1461										37.5	429	1493.33
37.6667	428	425	434	1370	1644	1461										37.6667	429	1491.67
37.8333	429	429	434	1368	1642	1463										37.8333	430.667	1491
38	428	425	437	1367	1646	1466										38	430	1493
38.1667	425	427	438	1370	1649	1475										38.1667	430	1498
38.3333	424	426	437	1373	1640	1476										38.3333	429	1496.33
38.5	427	426	435	1372	1651	1466										38.5	429.333	1496.33
38.6667	422	426	431	1362	1636	1456										38.6667	426.333	1484.67
38.8333	423	425	434	1364	1625	1456										38.8333	427.333	1481.67
39	427	424	439	1354	1613	1442										39	430	1469.67
39.1667	419	425	432	1350	1628	1440										39.1667	425.333	1472.67
39.3333	427	425	437	1349	1624	1451										39.3333	429.667	1474.67
39.5	422	426	436	1365	1617	1451										39.5	428	1477.67
39.6667	427	425	437	1355	1618	1449										39.6667	429.667	1474
39.8333	428	431	440	1359	1633	1458										39.8333	433	1483.33
40	426	425	442	1364	1626	1455										40	431	1481.67
40.1667	430	424	441	1365	1625	1443										40.1667	431.667	1477.67
40.3333	430	425	443	1360	1628	1455										40.3333	432.667	1481
40.5	433	430	441	1360	1625	1453										40.5	434.667	1479.33
40.6667	431	425	440	1366	1632	1448										40.6667	432	1482
40.8333	429	424	441	1370	1628	1449										40.8333	431.333	1482.33
41	435	429	441	1363	1634	1455										41	435	1484
41.1667	432	429	442	1370	1631	1455										41.1667	434.333	1485.33
41.3333	429	429	444	1367	1632	1461										41.3333	434	1486.67
41.5	433	430	446	1369	1635	1455										41.5	436.333	1486.33
41.6667	430	432	446	1369	1639	1460										41.6667	436	1489.33
41.8333	428	429	445	1369	1641	1467										41.8333	434	1492.33
42	428	429	443	1374	1639	1465										42	433.333	1492.67
42.1667	433	432	442	1371	1643	1472										42.1667	435.667	1495.33
42.3333	438	434	445	1373	1653	1471										42.3333	439	1499
42.5	435	437	449	1379	1649	1469										42.5	440.333	1499
42.6667	431	435	453	1373	1654	1471										42.6667	439.667	1499.33
42.8333	435	436	448	1372	1652	1466										42.8333	439.667	1496.67
43	439	436	451	1377	1656	1468										43	442	1500.33
43.1667	435	438	450	1384	1654	1479										43.1667	441	1505.67
43.3333	438	436	450	1381	1656	1479										43.3333	441.333	1505.33
43.5	438	436	449	1395	1653	1482										43.5	441	1510
43.6667	434	437	450	1385	1652	1479										43.6667	440.333	1505.33
43.8333	443	440	452	1384	1653	1473										43.8333	445	1503.33
44	439	436	453	1395	1660	1480										44	442.667	1511.67
44.1667	433	438	450													44.1667	440.333
44.3333	440	440	457													44.3333	445.667
44.5	440	437	455													44.5	444
44.6667	437	439	453													44.6667	443
44.8333	440	440	455													44.8333	445
45	445	442	455													45	447.333
45.1667	438	441	456													45.1667	445
45.3333	443	438	455													45.3333	445.333
45.5	443	440	457													45.5	446.667
45.6667	444	446	458													45.6667	449.333
45.8333	442	444	456													45.8333	447.333
46	442	444	462													46	449.333
46.1667	444	440	463													46.1667	449
46.3333	445	441	461													46.3333	449
46.5	443	447	457													46.5	449
46.6667	445	446	462													46.6667	451
46.8333	447	444	460													46.8333	450.333
47	449	444	460													47	451
47.1667	446	441	463													47.1667	450
47.3333	450	444	459													47.3333	451
47.5	446	446	466													47.5	452.667
47.6667	451	449	460													47.6667	453.333
47.8333	451	451	460													47.8333	454
48	449	449	463													48	453.667
48.1667	451	448	469													48.1667	456
48.3333	458	449	467													48.3333	458
48.5	456	453	470													48.5	459.667
48.6667	449	452	468													48.6667	456.333
48.8333	451	451	467													48.8333	456.333
49	457	451	468													49	458.667
49.1667	450	456	469													49.1667	458.333
49.3333	453	454	469													49.3333	458.667
49.5	458	451	469													49.5	459.333
49.6667	455	456	469													49.6667	460
49.8333	454	451	474													49.8333	459.667
50	454	453	468													50	458.333
50.1667	459	454	472													50.1667	461.667
50.3333	461	451	477													50.3333	463
50.5	457	454	473													50.5	461.333
50.6667	458	456	473													50.6667	462.333
50.8333	457	458	475													50.8333	463.333
51	459	458	472													51	463
51.1667	457	455	472													51.1667	461.333
51.3333	457	458	469													51.3333	461.333
51.5	459	456	476													51.5	463.667
51.6667	459	460	477													51.6667	465.333
51.8333	456	457	472													51.8333	461.667
52	461	456	476													52	464.333
52.1667	461	456	480													52.1667	465.667
52.3333	459	459	477													52.3333	465
52.5	465	458	483													52.5	468.667
52.6667	460	461	481													52.6667	467.333
52.8333	465	467	477													52.8333	469.667
53	462	459	480													53	467
53.1667	463	465	480													53.1667	469.333
53.3333	466	465	482													53.3333	471
53.5	466	465	482													53.5	471
53.6667	471	460	483													53.6667	471.333
53.8333	465	464	479													53.8333	469.333
54	468	467	481													54	472
54.1667	470	463	487													54.1667	473.333
54.3333	470	467	482													54.3333	473
54.5	470	465	488													54.5	474.333
54.6667	469	467	485													54.6667	473.667
54.8333	469	467	488													54.8333	474.667
55	476	467	484													55	475.667
55.1667	471	471	489													55.1667	477
55.3333	474	467	490													55.3333	477
55.5	468	468	493													55.5	476.333
55.6667	471	468	491													55.6667	476.667
55.8333	473	473	488													55.8333	478
56	473	468	489													56	476.667
56.1667	473	467	487													56.1667	475.667
56.3333	478	471	490													56.3333	479.667
56.5	473	472	485													56.5	476.667
56.6667	477	473	494													56.6667	481.333
56.8333	475	472	492													56.8333	479.667
57	474	475	492													57	480.333
57.1667	474	474	490													57.1667	479.333
57.3333	483	472	496													57.3333	483.667
57.5	479	473	494													57.5	482
57.6667	480	475	494													57.6667	483
57.8333	480	478	495													57.8333	484.333
58	475	476	492													58	481
58.1667	477	476	499													58.1667	484
58.3333	481	477	500													58.3333	486
58.5	478	480	500													58.5	486
58.6667	484	480	499													58.6667	487.667
58.8333	481	479	497													58.8333	485.667
59	482	476	497													59	485
59.1667	483	482	500													59.1667	488.333
59.3333	482	482	500													59.3333	488
59.5	487	482	500													59.5	489.667
59.6667	488	484	504													59.6667	492
59.8333	483	478	502													59.8333	487.667
60	488	484	503													60	491.667
60.1667	488	483	507													60.1667	492.667
60.3333	489	484	507													60.3333	493.333
60.5	490	484	504													60.5	492.667
60.6667	489	484	504													60.6667	492.333
60.8333	489	489	507													60.8333	495
61	487	484	507													61	492.667
61.1667	490	487	504													61.1667	493.667
61.3333	493	483	508													61.3333	494.667
61.5	490	490	506													61.5	495.333
61.6667	492	488	506													61.6667	495.333
61.8333	490	484	508													61.8333	494
62	492	489	510													62	497
62.1667	494	489	505													62.1667	496
62.3333	494	488	509													62.3333	497
62.5	490	493	507													62.5	496.667
62.6667	493	495	511													62.6667	499.667
62.8333	491	490	511													62.8333	497.333
63	500	493	511													63	501.333
63.1667	494	488	509													63.1667	497
63.3333	497	491	516													63.3333	501.333
63.5	493	495	512													63.5	500
63.6667	498	493	514													63.6667	501.667
63.8333	496	496	514													63.8333	502
64	499	494	520													64	504.333
64.1667	497	496	511													64.1667	501.333
64.3333	497	498	518													64.3333	504.333
64.5	499	497	513													64.5	503
64.6667	501	491	515													64.6667	502.333
64.8333	501	502	520													64.8333	507.667
65	502	497	517													65	505.333
65.1667	505	497	518													65.1667	506.667
65.3333	500	500	514													65.3333	504.667
65.5	504	500	523													65.5	509
65.6667	500	502	525													65.6667	509
65.8333	505	503	522													65.8333	510
66	509	502	524													66	511.667
66.1667	505	496	523													66.1667	508
66.3333	506	504	520													66.3333	510
66.5	506	502	524													66.5	510.667
66.6667	508	507	522													66.6667	512.333
66.8333	509	506	529													66.8333	514.667
67	508	504	524													67	512
67.1667	514	504	530													67.1667	516
67.3333	511	508	528													67.3333	515.667
67.5	516	506	526													67.5	516
67.6667	509	507	533													67.6667	516.333
67.8333	508	505	530													67.8333	514.333
68	511	510	530													68	517
68.1667	514	513	534													68.1667	520.333
68.3333	513	512	531													68.3333	518.667
68.5	511	512	534													68.5	519
68.6667	513	511	533													68.6667	519
68.8333	514	513	532													68.8333	519.667
69	516	518	531													69	521.667
69.1667	514	510	528													69.1667	517.333
69.3333	518	509	531													69.3333	519.333
69.5	521	515	538													69.5	524.667
69.6667	523	513	532													69.6667	522.667
69.8333	523	513	533													69.8333	523
70	520	514	544													70	526
70.1667	522	515	534													70.1667	523.667
70.3333	519	518	540													70.3333	525.667
70.5	518	518	541													70.5	525.667
70.6667	521	517	538													70.6667	525.333
70.8333	527	518	539													70.8333	528
71	522	519	540													71	527
71.1667	522	518	540													71.1667	526.667
71.3333	525	520	542													71.3333	529
71.5	527	523	539													71.5	529.667
71.6667	521	519	539													71.6667	526.333
71.8333	523	519	540													71.8333	527.333
72	525	521	546													72	530.667
72.1667	529	523	543													72.1667	531.667
72.3333	523	524	542													72.3333	529.667
72.5	527	523	544													72.5	531.333
72.6667	525	525	543													72.6667	531
72.8333	524	530	541													72.8333	531.667
73	528	528	545													73	533.667
73.1667	529	525	548													73.1667	534
73.3333	528	529	543													73.3333	533.333
73.5	531	527	547													73.5	535
73.6667	532	525	551													73.6667	536
73.8333	527	524	544													73.8333	531.667
74	531	524	550													74	535
74.1667	533	525	548													74.1667	535.333
74.3333	534	527	549													74.3333	536.667
74.5	529	525	550													74.5	534.667
74.6667	536	534	552													74.6667	540.667
74.8333	530	532	548													74.8333	536.667
75	536	536	550													75	540.667
75.1667	532	531	550													75.1667	537.667
75.3333	536	534	554													75.3333	541.333
75.5	535	532	549													75.5	538.667
75.6667	538	535	557													75.6667	543.333
75.8333	536	532	552													75.8333	540
76	541	531	552													76	541.333
76.1667	537	531	550													76.1667	539.333
76.3333	537	537	556													76.3333	543.333
76.5	537	525	556													76.5	539.333
76.6667	539	533	553													76.6667	541.667
76.8333	537	539	553													76.8333	543
77	538	536	558													77	544
77.1667	541	537	556													77.1667	544.667
77.3333	541	535	557													77.3333	544.333
77.5	542	535	557													77.5	544.667
77.6667	541	536	556													77.6667	544.333
77.8333	543	535	560													77.8333	546
78	545	538	560													78	547.667
78.1667	546	541	563													78.1667	550
78.3333	545	539	560													78.3333	548
78.5	548	544	560													78.5	550.667
78.6667	543	538	560													78.6667	547
78.8333	547	538	559													78.8333	548
79	543	544	563													79	550
79.1667	549	542	572													79.1667	554.333
79.3333	546	544	562													79.3333	550.667
79.5	547	542	565													79.5	551.333
79.6667	548	544	568													79.6667	553.333
79.8333	550	541	566													79.8333	552.333
80	546	544	566													80	552
80.1667	552	543	565													80.1667	553.333
80.3333	550	546	563													80.3333	553
80.5	550	544	566													80.5	553.333
80.6667	550	546	568													80.6667	554.667
80.8333	553	546	569													80.8333	556
81	554	547	565													81	555.333
81.1667	554	548	571													81.1667	557.667
81.3333	552	548	568													81.3333	556
81.5	553	555	566													81.5	558
81.6667	554	546	571													81.6667	557
81.8333	552	549	568													81.8333	556.333
82	554	550	571													82	558.333
82.1667	554	549	569													82.1667	557.333
82.3333	556	553	574													82.3333	561
82.5	556	549	574													82.5	559.667
82.6667	556	552	576													82.6667	561.333
82.8333	560	550	573													82.8333	561
83	559	549	575													83	561
83.1667	555	551	570													83.1667	558.667
83.3333	557	552	574													83.3333	561
83.5	564	551	574													83.5	563
83.6667	563	556	580													83.6667	566.333
83.8333	561	554	576													83.8333	563.667
84	559	555	579													84	564.333
84.1667	563	558	573													84.1667	564.667
84.3333	565	557	576													84.3333	566
84.5	564	557	581													84.5	567.333
84.6667	561	557	577													84.6667	565
84.8333	568	561	579													84.8333	569.333
85	569	558	581													85	569.333
85.1667	564	561	580													85.1667	568.333
85.3333	567	562	588													85.3333	572.333
85.5	571	562	584													85.5	572.333
85.6667	567	559	582													85.6667	569.333
85.8333	572	561	582													85.8333	571.667
86	570	562	582													86	571.333
86.1667	571	565	583													86.1667	573
86.3333	573	569	585													86.3333	575.667
86.5	574	565	589													86.5	576
86.6667	571	568	590													86.6667	576.333
86.8333	575	560	587													86.8333	574
87	571	567	590													87	576
87.1667	575	567	589													87.1667	577
87.3333	574	569	588													87.3333	577
87.5	571	565	593													87.5	576.333
87.6667	573	566	589													87.6667	576
87.8333	577	561	589													87.8333	575.667
88	573	568	591													88	577.333
88.1667	574	570	590													88.1667	578
88.3333	580	568	592													88.3333	580
88.5	580	573	598													88.5	583.667
88.6667	574	572	595													88.6667	580.333
88.8333	580	576	590													88.8333	582
89	578	571	590													89	579.667
89.1667	583	573	601													89.1667	585.667
89.3333	583	573	596													89.3333	584
89.5	582	574	600													89.5	585.333
89.6667	585	578	599													89.6667	587.333
89.8333	584	577	602													89.8333	587.667
90	586	578	597													90	587
90.1667	587	577	604													90.1667	589.333
90.3333	591	577	604													90.3333	590.667
90.5	587	579	601													90.5	589
90.6667	587	579	604													90.6667	590
90.8333	590	585	604													90.8333	593
91	592	585	599													91	592
91.1667	595	580	601													91.1667	592
91.3333	591	583	601													91.3333	591.667
91.5	588	584	608													91.5	593.333
91.6667	590	585	604													91.6667	593
91.8333	591	584	603													91.8333	592.667
92	590	583	603													92	592
92.1667	595	584	604													92.1667	594.333
92.3333	593	583	610													92.3333	595.333
92.5	591	584	610													92.5	595
92.6667	594	590	610													92.6667	598
92.8333	596	587	611													92.8333	598
93	599	586	609													93	598
93.1667	595	585	612													93.1667	597.333
93.3333	601	591	610													93.3333	600.667
93.5	600	592	609													93.5	600.333
93.6667	599	590	615													93.6667	601.333
93.8333	604	597	612													93.8333	604.333
94	596	597	614													94	602.333
94.1667	604	588	618													94.1667	603.333
94.3333	599	593	616													94.3333	602.667
94.5	602	593	615													94.5	603.333
94.6667	595	595	619													94.6667	603
94.8333	604	596	619													94.8333	606.333
95	607	597	621													95	608.333
95.1667	606	606	619													95.1667	610.333
95.3333	610	601	623													95.3333	611.333
95.5	613	599	622													95.5	611.333
95.6667	611	602	621													95.6667	611.333
95.8333	611	598	624													95.8333	611
96	609	605	620													96	611.333
96.1667	612	602	621													96.1667	611.667
96.3333	610	609	618													96.3333	612.333
96.5	609	602	624													96.5	611.667
96.6667	613	603	626													96.6667	614
96.8333	618	604	625													96.8333	615.667
97	619	610	632													97	620.333
97.1667	611	606	627													97.1667	614.667
97.3333	617	609	629													97.3333	618.333
97.5	616	610	630													97.5	618.667
97.6667	622	607	632													97.6667	620.333
97.8333	616	609	630													97.8333	618.333
98	618	609	633													98	620
98.1667	618	607	629													98.1667	618
98.3333	618	610	632													98.3333	620
98.5	622	609	631													98.5	620.667
98.6667	621	609	632													98.6667	620.667
98.8333	617	615	632													98.8333	621.333
99	625	615	631													99	623.667
99.1667	620	615	639													99.1667	624.667
99.3333	618	615	639													99.3333	624
99.5	621	618	639													99.5	626
99.6667	624	613	637													99.6667	624.667
99.8333	626	614	634													99.8333	624.667
100	628	619	635													100	627.333
100.167	626	619	643													100.167	629.333
100.333	623	620	637													100.333	626.667
100.5	624	618	646													100.5	629.333
100.667	630	613	641													100.667	628
100.833	626	616	644													100.833	628.667
101	633	623	642													101	632.667
101.167	630	622	643													101.167	631.667
101.333	629	620	644													101.333	631
101.5	632	619	640													101.5	630.333
101.667	639	621	648													101.667	636
101.833	633	619	644													101.833	632
102	635	622	643													102	633.333
102.167	632	627	647													102.167	635.333
102.333	634	621	644													102.333	633
102.5	632	623	647													102.5	634
102.667	636	625	643													102.667	634.667
102.833	631	629	642													102.833	634
103	636	628	650													103	638
103.167	637	631	651													103.167	639.667
103.333	638	630	657													103.333	641.667
103.5	637	629	645													103.5	637
103.667	639	629	653													103.667	640.333
103.833	637	632	653													103.833	640.667
104	642	633	654													104	643
104.167	641	632	652													104.167	641.667
104.333	640	629	654													104.333	641
104.5	645	632	657													104.5	644.667
104.667	648	633	654													104.667	645
104.833	647	634	655													104.833	645.333
105	648	635	656													105	646.333
105.167	646	639	651													105.167	645.333
105.333	643	633	656													105.333	644
105.5	645	635	656													105.5	645.333
105.667	645	631	657													105.667	644.333
105.833	646	633	653													105.833	644
106	653	634	655													106	647.333
106.167	653	633	658													106.167	648
106.333	653	639	658													106.333	650
106.5	649	639	660													106.5	649.333
106.667	654	642	664													106.667	653.333
106.833	653	644	661													106.833	652.667
107	646	642	664													107	650.667
107.167	654	644	661													107.167	653
107.333	657	642	667													107.333	655.333
107.5	655	646	662													107.5	654.333
107.667	653	645	665													107.667	654.333
107.833	662	649	666													107.833	659
108	655	649	667													108	657
108.167	662	645	671													108.167	659.333
108.333	659	646	667													108.333	657.333
108.5	656	648	669													108.5	657.667
108.667	659	646	671													108.667	658.667
108.833	659	646	668													108.833	657.667
109	660	651	671													109	660.667
109.167	663	648	672													109.167	661
109.333	666	647	672													109.333	661.667
109.5	667	652	670													109.5	663
109.667	668	652	675													109.667	665
109.833	664	653	677													109.833	664.667
110	664	653	675													110	664
110.167	672	654	674													110.167	666.667
110.333	665	653	676													110.333	664.667
110.5	667	657	675													110.5	666.333
110.667	670	656	676													110.667	667.333
110.833	670	659	679													110.833	669.333
111	666	655	670													111	663.667
111.167	673	651	682													111.167	668.667
111.333	668	657	684													111.333	669.667
111.5	674	661	674													111.5	669.667
111.667	675	660	684													111.667	673
111.833	679	665	683													111.833	675.667
112	675	663	682													112	673.333
112.167	672	661	679													112.167	670.667
112.333	682	664	688													112.333	678
112.5	676	665	688													112.5	676.333
112.667	678	665	686													112.667	676.333
112.833	679	660	687													112.833	675.333
113	679	668	684													113	677
113.167	680	664	686													113.167	676.667
113.333	685	664	689													113.333	679.333
113.5	681	670	692													113.5	681
113.667	680	674	688													113.667	680.667
113.833	687	671	694													113.833	684
114	688	671	694													114	684.333
114.167	688	665	691													114.167	681.333
114.333	680	675	693													114.333	682.667
114.5	688	672	691													114.5	683.667
114.667	688	672	695													114.667	685
114.833	686	673	695													114.833	684.667
115	690	679	699													115	689.333
115.167	692	674	692													115.167	686
115.333	696	681	697													115.333	691.333
115.5	690	677	701													115.5	689.333
115.667	692	677	699													115.667	689.333
115.833	696	679	698													115.833	691
116	693	679	697													116	689.667
116.167	694	682	702													116.167	692.667
116.333	697	682	701													116.333	693.333
116.5	691	680	706													116.5	692.333
116.667	699	685	707													116.667	697
116.833	691	682	706													116.833	693
117	697	685	708													117	696.667
117.167	698	685	705													117.167	696
117.333	694	682	705													117.333	693.667
117.5	702	688	709													117.5	699.667
117.667	704	690	709													117.667	701
117.833	705	688	706													117.833	699.667
118	708	688	711													118	702.333
118.167	706	688	712													118.167	702
118.333	704	687	714													118.333	701.667
118.5	710	691	711													118.5	704
118.667	705	694	712													118.667	703.667
118.833	708	691	714													118.833	704.333
119	709	692	718													119	706.333
119.167	712	696	716													119.167	708
119.333	712	689	721													119.333	707.333
119.5	707	698	719													119.5	708
119.667	709	695	718													119.667	707.333
119.833	709	690	712													119.833	703.667
120	716	699	719													120	711.333
120.167	716	698	714													120.167	709.333
120.333	711	697	719													120.333	709
120.5	719	700	717													120.5	712
120.667	716	700	719													120.667	711.667

## Sheet: PSMB1
25 µg/mL PSMβ1 monomers in the absence and presence of seeds of the other PSM peptides
Raw data														Averaged data
Time (h)	Unseeded	Unseeded	Unseeded	Time (h)	PSMα1 seeds	PSMα1 seeds	PSMα1 seeds	PSMα3 seeds	PSMα3 seeds	PSMα3 seeds	PSMβ2 seeds	PSMβ2 seeds	PSMβ2 seeds	Time (h)	Unseeded	PSMα1 seeds	PSMα3 seeds	PSMβ2 seeds	unseeded
0	941	1013	958	0	2278	1317	1299	562	585	569	559	598	511	0	970.667	1631.33	572	556	919.778
0.166667	855	908	867	0.166667	2187	1103	1253	400	411	392	511	577	512	0.166667	876.667	1514.33	401	533.333	816.222
0.333333	814	865	836	0.333333	1732	1075	1234	380	383	364	549	649	519	0.333333	838.333	1347	375.667	572.333	765
0.5	801	845	810	0.5	1659	1069	1239	382	380	368	604	754	526	0.5	818.667	1322.33	376.667	628	775.667
0.666667	780	847	811	0.666667	1624	1077	1262	396	398	379	658	840	540	0.666667	812.667	1321	391	679.333	797.111
0.833333	771	833	805	0.833333	1628	1106	1285	412	413	396	705	907	566	0.833333	803	1339.67	407	726	824.222
1	777	822	801	1	1645	1151	1323	428	430	414	752	968	594	1	800	1373	424	771.333	856.111
1.16667	780	834	794	1.16667	1659	1206	1355	447	456	427	794	1022	620	1.16667	802.667	1406.67	443.333	812	887.333
1.33333	787	839	796	1.33333	1685	1266	1393	466	473	458	841	1075	651	1.33333	807.333	1448	465.667	855.667	923.111
1.5	785	845	790	1.5	1710	1304	1425	488	486	476	880	1116	697	1.5	806.667	1479.67	483.333	897.667	953.556
1.66667	796	849	792	1.66667	1720	1337	1447	506	513	494	918	1157	745	1.66667	812.333	1501.33	504.333	940	981.889
1.83333	784	865	811	1.83333	1739	1377	1477	519	527	510	953	1181	791	1.83333	820	1531	518.667	975	1008.22
2	787	864	822	2	1761	1403	1512	531	535	524	978	1204	834	2	824.333	1558.67	530	1005.33	1031.33
2.16667	808	862	809	2.16667	1762	1424	1527	547	552	536	1004	1218	868	2.16667	826.333	1571	545	1030	1048.67
2.33333	803	873	815	2.33333	1779	1455	1546	553	564	541	1025	1243	902	2.33333	830.333	1593.33	552.667	1056.67	1067.56
2.5	812	879	814	2.5	1778	1469	1560	563	568	550	1046	1256	919	2.5	835	1602.33	560.333	1073.67	1078.78
2.66667	814	907	803	2.66667	1793	1488	1582	574	577	557	1064	1255	934	2.66667	841.333	1621	569.333	1084.33	1091.56
2.83333	814	946	824	2.83333	1785	1505	1585	583	582	564	1083	1267	946	2.83333	861.333	1625	576.333	1098.67	1100
3	893	971	850	3	1779	1515	1604	593	595	576	1079	1270	962	3	904.667	1632.67	588	1103.67	1108.11
3.16667	983	978	906	3.16667	1801	1522	1617	598	598	579	1101	1285	963	3.16667	955.667	1646.67	591.667	1116.33	1118.22
3.33333	996	1038	966	3.33333	1799	1527	1633	607	597	582	1110	1290	985	3.33333	1000	1653	595.333	1128.33	1125.56
3.5	1054	1065	1013	3.5	1803	1536	1627	614	611	584	1116	1306	990	3.5	1044	1655.33	603	1137.33	1131.89
3.66667	1085	1094	1038	3.66667	1804	1550	1636	613	607	592	1121	1304	988	3.66667	1072.33	1663.33	604	1137.67	1135
3.83333	1154	1138	1082	3.83333	1799	1555	1647	620	619	597	1126	1308	1007	3.83333	1124.67	1667	612	1147	1142
4	1211	1185	1168	4	1807	1559	1642	624	619	599	1140	1312	999	4	1188	1669.33	614	1150.33	1144.56
4.16667	1271	1251	1214	4.16667	1806	1555	1652	622	621	607	1141	1320	1008	4.16667	1245.33	1671	616.667	1156.33	1148
4.33333	1353	1308	1265	4.33333	1813	1565	1655	624	628	608	1153	1328	1013	4.33333	1308.67	1677.67	620	1164.67	1154.11
4.5	1415	1354	1349	4.5	1813	1569	1660	633	629	609	1156	1326	1021	4.5	1372.67	1680.67	623.667	1167.67	1157.33
4.66667	1485	1417	1436	4.66667	1806	1566	1670	639	635	617	1160	1330	1024	4.66667	1446	1680.67	630.333	1171.33	1160.78
4.83333	1608	1481	1493	4.83333	1809	1582	1664	639	632	616	1166	1343	1027	4.83333	1527.33	1685	629	1178.67	1164.22
5	1729	1511	1587	5	1814	1568	1663	642	637	625	1174	1346	1029	5	1609	1681.67	634.667	1183	1166.44
5.16667	1782	1570	1651	5.16667	1809	1577	1668	648	637	624	1171	1344	1034	5.16667	1667.67	1684.67	636.333	1183	1168
5.33333	1874	1656	1710	5.33333	1806	1572	1675	650	640	620	1184	1350	1037	5.33333	1746.67	1684.33	636.667	1190.33	1170.44
5.5	1913	1726	1780	5.5	1815	1583	1671	652	644	632	1192	1349	1033	5.5	1806.33	1689.67	642.667	1191.33	1174.56
5.66667	1983	1745	1846	5.66667	1819	1582	1682	657	651	632	1194	1351	1043	5.66667	1858	1694.33	646.667	1196	1179
5.83333	2067	1797	1905	5.83333	1817	1587	1683	658	651	634	1191	1356	1044	5.83333	1923	1695.67	647.667	1197	1180.11
6	2121	1855	1977	6	1816	1583	1676	658	655	638	1190	1357	1045	6	1984.33	1691.67	650.333	1197.33	1179.78
6.16667	2196	1916	2029	6.16667	1816	1578	1680	669	663	634	1199	1364	1048	6.16667	2047	1691.33	655.333	1203.67	1183.44
6.33333	2247	1969	2102	6.33333	1822	1579	1683	667	658	643	1199	1371	1054	6.33333	2106	1694.67	656	1208	1186.22
6.5	2276	1996	2127	6.5	1819	1580	1690	669	660	643	1214	1371	1059	6.5	2133	1696.33	657.333	1214.67	1189.44
6.66667	2369	2082	2203	6.66667	1820	1582	1690	668	667	642	1208	1381	1058	6.66667	2218	1697.33	659	1215.67	1190.67
6.83333	2420	2161	2215	6.83333	1821	1582	1687	672	665	649	1222	1372	1061	6.83333	2265.33	1696.67	662	1218.33	1192.33
7	2430	2192	2280	7	1818	1586	1680	681	670	652	1219	1374	1067	7	2300.67	1694.67	667.667	1220	1194.11
7.16667	2494	2219	2321	7.16667	1821	1589	1685	672	669	652	1228	1378	1070	7.16667	2344.67	1698.33	664.333	1225.33	1196
7.33333	2534	2307	2384	7.33333	1821	1590	1693	679	670	653	1229	1392	1074	7.33333	2408.33	1701.33	667.333	1231.67	1200.11
7.5	2620	2345	2427	7.5	1825	1588	1689	684	676	658	1228	1398	1066	7.5	2464	1700.67	672.667	1230.67	1201.33
7.66667	2643	2399	2452	7.66667	1829	1588	1696	681	677	657	1228	1392	1075	7.66667	2498	1704.33	671.667	1231.67	1202.56
7.83333	2680	2448	2563	7.83333	1826	1595	1691	690	679	662	1227	1400	1077	7.83333	2563.67	1704	677	1234.67	1205.22
8	2708	2494	2518	8	1828	1589	1689	686	683	661	1248	1400	1072	8	2573.33	1702	676.667	1240	1206.22
8.16667	2772	2570	2605	8.16667	1826	1587	1699	689	684	668	1241	1400	1081	8.16667	2649	1704	680.333	1240.67	1208.33
8.33333	2829	2608	2644	8.33333	1821	1590	1692	691	685	667	1242	1398	1081	8.33333	2693.67	1701	681	1240.33	1207.44
8.5	2863	2635	2699	8.5	1830	1595	1706	698	685	672	1242	1413	1085	8.5	2732.33	1710.33	685	1246.67	1214
8.66667	2881	2668	2722	8.66667	1825	1597	1702	696	698	672	1247	1411	1086	8.66667	2757	1708	688.667	1248	1214.89
8.83333	2946	2717	2780	8.83333	1831	1587	1688	701	691	673	1251	1411	1087	8.83333	2814.33	1702	688.333	1249.67	1213.33
9	2981	2811	2825	9	1835	1600	1698	699	691	676	1250	1411	1088	9	2872.33	1711	688.667	1249.67	1216.44
9.16667	3049	2852	2877	9.16667	1832	1593	1697	702	696	671	1264	1414	1093	9.16667	2926	1707.33	689.667	1257	1218
9.33333	3067	2890	2913	9.33333	1831	1599	1700	698	696	687	1251	1423	1089	9.33333	2956.67	1710	693.667	1254.33	1219.33
9.5	3120	2945	2949	9.5	1835	1595	1698	705	703	683	1261	1428	1101	9.5	3004.67	1709.33	697	1263.33	1223.22
9.66667	3180	2992	2982	9.66667	1833	1601	1702	710	704	683	1259	1422	1097	9.66667	3051.33	1712	699	1259.33	1223.44
9.83333	3266	3071	3027	9.83333	1836	1594	1690	714	703	684	1261	1415	1095	9.83333	3121.33	1706.67	700.333	1257	1221.33
10	3283	3132	3075	10	1831	1599	1695	709	710	685	1262	1432	1109	10	3163.33	1708.33	701.333	1267.67	1225.78
10.1667	3286	3141	3113	10.1667	1827	1599	1704	710	708	686	1270	1423	1097	10.1667	3180	1710	701.333	1263.33	1224.89
10.3333	3364	3222	3145	10.3333	1837	1606	1704	713	714	688	1275	1432	1101	10.3333	3243.67	1715.67	705	1269.33	1230
10.5	3403	3271	3178	10.5	1838	1599	1710	716	714	692	1272	1434	1106	10.5	3284	1715.67	707.333	1270.67	1231.22
10.6667	3445	3308	3245	10.6667	1837	1607	1708	712	718	693	1277	1431	1114	10.6667	3332.67	1717.33	707.667	1274	1233
10.8333	3472	3367	3282	10.8333	1835	1599	1703	717	715	690	1280	1442	1113	10.8333	3373.67	1712.33	707.333	1278.33	1232.67
11	3490	3452	3292	11	1832	1604	1702	726	712	701	1278	1446	1114	11	3411.33	1712.67	713	1279.33	1235
11.1667	3591	3496	3323	11.1667	1843	1598	1703	722	720	701	1285	1448	1118	11.1667	3470	1714.67	714.333	1283.67	1237.56
11.3333	3605	3548	3357	11.3333	1838	1605	1717	721	722	699	1282	1439	1118	11.3333	3503.33	1720	714	1279.67	1237.89
11.5	3707	3576	3425	11.5	1848	1610	1710	718	721	696	1290	1444	1119	11.5	3569.33	1722.67	711.667	1284.33	1239.56
11.6667	3744	3693	3448	11.6667	1842	1597	1708	720	726	695	1294	1452	1123	11.6667	3628.33	1715.67	713.667	1289.67	1239.67
11.8333	3754	3714	3458	11.8333	1836	1595	1705	729	723	702	1298	1449	1130	11.8333	3642	1712	718	1292.33	1240.78
12	3772	3783	3505	12	1839	1602	1709	732	724	701	1291	1457	1120	12	3686.67	1716.67	719	1289.33	1241.67
12.1667	3864	3773	3553	12.1667	1856	1602	1713	730	730	700	1290	1459	1129	12.1667	3730	1723.67	720	1292.67	1245.44
12.3333	3888	3857	3613	12.3333	1839	1606	1713	731	736	707	1300	1456	1129	12.3333	3786	1719.33	724.667	1295	1246.33
12.5	3924	3910	3627	12.5	1838	1603	1714	734	738	705	1297	1455	1131	12.5	3820.33	1718.33	725.667	1294.33	1246.11
12.6667	3976	3945	3682	12.6667	1845	1601	1716	735	742	700	1297	1460	1128	12.6667	3867.67	1720.67	725.667	1295	1247.11
12.8333	4049	4015	3728	12.8333	1839	1607	1711	730	741	703	1299	1458	1133	12.8333	3930.67	1719	724.667	1296.67	1246.78
13	4084	4056	3768	13	1839	1607	1713	733	736	715	1307	1457	1137	13	3969.33	1719.67	728	1300.33	1249.33
13.1667	4146	4121	3826	13.1667	1847	1599	1714	737	738	708	1307	1463	1138	13.1667	4031	1720	727.667	1302.67	1250.11
13.3333	4201	4189	3833	13.3333	1850	1606	1718	742	739	711	1302	1470	1137	13.3333	4074.33	1724.67	730.667	1303	1252.78
13.5	4179	4243	3906	13.5	1842	1606	1719	742	735	705	1310	1467	1142	13.5	4109.33	1722.33	727.333	1306.33	1252
13.6667	4253	4303	3918	13.6667	1842	1600	1719	739	737	711	1313	1476	1145	13.6667	4158	1720.33	729	1311.33	1253.56
13.8333	4347	4354	3949	13.8333	1846	1605	1710	745	745	719	1309	1480	1135	13.8333	4216.67	1720.33	736.333	1308	1254.89
14	4345	4420	4015	14	1834	1614	1715	741	751	720	1300	1469	1144	14	4260	1721	737.333	1304.33	1254.22
14.1667	4401	4491	4069	14.1667	1843	1612	1713	740	747	725	1310	1474	1147	14.1667	4320.33	1722.67	737.333	1310.33	1256.78
14.3333	4426	4482	4074	14.3333	1845	1602	1710	748	749	722	1310	1470	1149	14.3333	4327.33	1719	739.667	1309.67	1256.11
14.5	4517	4593	4145	14.5	1844	1606	1713	747	751	717	1315	1475	1144	14.5	4418.33	1721	738.333	1311.33	1256.89
14.6667	4575	4606	4190	14.6667	1845	1611	1717	746	749	721	1318	1482	1149	14.6667	4457	1724.33	738.667	1316.33	1259.78
14.8333	4598	4662	4196	14.8333	1840	1615	1716	747	755	726	1321	1477	1157	14.8333	4485.33	1723.67	742.667	1318.33	1261.56
15	4655	4718	4254	15	1850	1607	1709	750	755	728	1311	1481	1152	15	4542.33	1722	744.333	1314.67	1260.33
15.1667	4711	4744	4292	15.1667	1850	1610	1718	756	761	724	1316	1486	1155	15.1667	4582.33	1726	747	1319	1264
15.3333	4737	4784	4304	15.3333	1846	1611	1715	753	753	720	1325	1494	1160	15.3333	4608.33	1724	742	1326.33	1264.11
15.5	4802	4830	4355	15.5	1849	1598	1710	759	754	725	1324	1490	1147	15.5	4662.33	1719	746	1320.33	1261.78
15.6667	4817	4876	4442	15.6667	1848	1614	1712	759	758	726	1324	1480	1160	15.6667	4711.67	1724.67	747.667	1321.33	1264.56
15.8333	4926	4983	4436	15.8333	1845	1609	1713	757	761	722	1324	1490	1160	15.8333	4781.67	1722.33	746.667	1324.67	1264.56
16	4934	4985	4535	16	1841	1610	1716	759	761	729	1323	1493	1158	16	4818	1722.33	749.667	1324.67	1265.56
16.1667	5015	5049	4516	16.1667	1840	1603	1710	755	761	733	1325	1493	1165	16.1667	4860	1717.67	749.667	1327.67	1265
16.3333	5047	5125	4528	16.3333	1850	1602	1720	755	771	735	1332	1497	1163	16.3333	4900	1724	753.667	1330.67	1269.44
16.5	5119	5163	4625	16.5	1841	1606	1719	760	763	728	1330	1495	1162	16.5	4969	1722	750.333	1329	1267.11
16.6667	5158	5219	4673	16.6667	1846	1613	1713	768	770	727	1331	1495	1166	16.6667	5016.67	1724	755	1330.67	1269.89
16.8333	5220	5257	4705	16.8333	1840	1611	1704	759	764	738	1335	1494	1173	16.8333	5060.67	1718.33	753.667	1334	1268.67
17	5279	5242	4707	17	1844	1607	1718	764	770	737	1337	1504	1171	17	5076	1723	757	1337.33	1272.44
17.1667	5297	5344	4757	17.1667	1852	1598	1717	763	774	731	1328	1496	1183	17.1667	5132.67	1722.33	756	1335.67	1271.33
17.3333	5350	5384	4859	17.3333	1841	1608	1725	768	774	736	1336	1496	1164	17.3333	5197.67	1724.67	759.333	1332	1272
17.5	5427	5438	4865	17.5	1845	1603	1711	770	777	740	1335	1517	1177	17.5	5243.33	1719.67	762.333	1343	1275
17.6667	5479	5494	4898	17.6667	1852	1607	1719	773	776	742	1342	1504	1174	17.6667	5290.33	1726	763.667	1340	1276.56
17.8333	5462	5548	4921	17.8333	1846	1608	1718	770	773	739	1339	1510	1177	17.8333	5310.33	1724	760.667	1342	1275.56
18	5516	5617	4974	18	1850	1601	1710	772	775	739	1343	1508	1173	18	5369	1720.33	762	1341.33	1274.56
18.1667	5538	5572	5062	18.1667	1842	1610	1714	776	783	738	1338	1503	1181	18.1667	5390.67	1722	765.667	1340.67	1276.11
18.3333	5599	5633	5079	18.3333	1836	1605	1716	775	782	743	1344	1510	1176	18.3333	5437	1719	766.667	1343.33	1276.33
18.5	5688	5675	5133	18.5	1845	1604	1717	777	776	742	1344	1504	1178	18.5	5498.67	1722	765	1342	1276.33
18.6667	5761	5723	5167	18.6667	1843	1607	1715	779	783	740	1350	1513	1180	18.6667	5550.33	1721.67	767.333	1347.67	1278.89
18.8333	5730	5761	5207	18.8333	1846	1610	1723	776	784	744	1352	1510	1188	18.8333	5566	1726.33	768	1350	1281.44
19	5807	5796	5255	19	1847	1603	1705	785	789	750	1347	1510	1184	19	5619.33	1718.33	774.667	1347	1280
19.1667	5866	5840	5280	19.1667	1844	1609	1719	777	787	746	1356	1514	1189	19.1667	5662	1724	770	1353	1282.33
19.3333	5888	5933	5347	19.3333	1847	1607	1710	777	784	750	1346	1520	1189	19.3333	5722.67	1721.33	770.333	1351.67	1281.11
19.5	5923	5910	5404	19.5	1851	1603	1713	779	790	743	1347	1518	1191	19.5	5745.67	1722.33	770.667	1352	1281.67
19.6667	5980	6006	5441	19.6667	1837	1603	1713	783	793	747	1347	1521	1191	19.6667	5809	1717.67	774.333	1353	1281.67
19.8333	6020	6047	5473	19.8333	1837	1602	1710	784	789	744	1349	1515	1189	19.8333	5846.67	1716.33	772.333	1351	1279.89
20	6071	6050	5540	20	1837	1607	1713	784	791	748	1349	1523	1196	20	5887	1719	774.333	1356	1283.11
20.1667	6099	6090	5547	20.1667	1843	1609	1715	799	791	758	1351	1520	1193	20.1667	5912	1722.33	782.667	1354.67	1286.56
20.3333	6113	6127	5557	20.3333	1846	1601	1710	793	796	754	1355	1522	1197	20.3333	5932.33	1719	781	1358	1286
20.5	6229	6175	5639	20.5	1844	1608	1718	797	799	758	1354	1531	1199	20.5	6014.33	1723.33	784.667	1361.33	1289.78
20.6667	6265	6249	5709	20.6667	1844	1610	1723	799	802	759	1356	1529	1202	20.6667	6074.33	1725.67	786.667	1362.33	1291.56
20.8333	6278	6321	5730	20.8333	1843	1604	1717	797	801	752	1360	1525	1200	20.8333	6109.67	1721.33	783.333	1361.67	1288.78
21	6357	6292	5820	21	1850	1604	1715	801	793	758	1355	1529	1199	21	6156.33	1723	784	1361	1289.33
21.1667	6385	6386	5766	21.1667	1847	1602	1710	801	805	754	1357	1535	1190	21.1667	6179	1719.67	786.667	1360.67	1289
21.3333	6390	6378	5835	21.3333	1835	1607	1716	805	802	757	1366	1536	1197	21.3333	6201	1719.33	788	1366.33	1291.22
21.5	6421	6409	5894	21.5	1844	1610	1711	801	802	751	1358	1535	1209	21.5	6241.33	1721.67	784.667	1367.33	1291.22
21.6667	6503	6505	5942	21.6667	1854	1613	1714	804	802	757	1353	1539	1205	21.6667	6316.67	1727	787.667	1365.67	1293.44
21.8333	6535	6501	5950	21.8333	1843	1614	1719	805	811	758	1363	1532	1193	21.8333	6328.67	1725.33	791.333	1362.67	1293.11
22	6565	6531	5980	22	1842	1614	1714	800	808	759	1366	1534	1203	22	6358.67	1723.33	789	1367.67	1293.33
22.1667	6613	6535	6048	22.1667	1843	1610	1726	805	807	759	1372	1547	1204	22.1667	6398.67	1726.33	790.333	1374.33	1297
22.3333	6630	6606	6086	22.3333	1842	1598	1712	809	802	758	1365	1535	1203	22.3333	6440.67	1717.33	789.667	1367.67	1291.56
22.5	6661	6597	6116	22.5	1847	1608	1719	808	812	764	1362	1537	1204	22.5	6458	1724.67	794.667	1367.67	1295.67
22.6667	6732	6619	6171	22.6667	1848	1604	1717	809	810	767	1366	1539	1209	22.6667	6507.33	1723	795.333	1371.33	1296.56
22.8333	6743	6664	6195	22.8333	1842	1610	1712	811	806	758	1371	1537	1217	22.8333	6534	1721.33	791.667	1375	1296
23	6802	6767	6224	23	1849	1602	1721	811	808	764	1368	1538	1212	23	6597.67	1724	794.333	1372.67	1297
23.1667	6820	6769	6314	23.1667	1847	1605	1724	814	817	766	1365	1540	1209	23.1667	6634.33	1725.33	799	1371.33	1298.56
23.3333	6853	6762	6305	23.3333	1839	1610	1727	818	811	768	1373	1539	1210	23.3333	6640	1725.33	799	1374	1299.44
23.5	6904	6843	6381	23.5	1850	1598	1722	814	819	764	1372	1542	1213	23.5	6709.33	1723.33	799	1375.67	1299.33
23.6667	6933	6837	6423	23.6667	1848	1608	1725	814	817	767	1365	1542	1218	23.6667	6731	1727	799.333	1375	1300.44
23.8333	6915	6914	6429	23.8333	1848	1602	1726	822	819	766	1372	1540	1221	23.8333	6752.67	1725.33	802.333	1377.67	1301.78
24	7010	6947	6419	24	1847	1604	1719	824	817	763	1373	1542	1223	24	6792	1723.33	801.333	1379.33	1301.33
24.1667	7056	6953	6490	24.1667	1844	1612	1727	822	818	768	1370	1545	1222	24.1667	6833	1727.67	802.667	1379	1303.11
24.3333	7032	6953	6521	24.3333	1849	1609	1721	822	821	773	1372	1552	1224	24.3333	6835.33	1726.33	805.333	1382.67	1304.78
24.5	7058	7015	6598	24.5	1838	1603	1718	830	817	765	1379	1556	1220	24.5	6890.33	1719.67	804	1385	1302.89
24.6667	7124	7010	6614	24.6667	1838	1606	1718	822	822	763	1379	1549	1225	24.6667	6916	1720.67	802.333	1384.33	1302.44
24.8333	7108	7061	6594	24.8333	1847	1608	1724	828	824	774	1374	1551	1224	24.8333	6921	1726.33	808.667	1383	1306
25	7192	7036	6700	25	1845	1608	1720	834	822	765	1382	1554	1224	25	6976	1724.33	807	1386.67	1306
25.1667	7198	7066	6729	25.1667	1844	1610	1729	832	825	768	1375	1549	1225	25.1667	6997.67	1727.67	808.333	1383	1306.33
25.3333	7251	7130	6775	25.3333	1845	1595	1721	838	820	776	1386	1562	1226	25.3333	7052	1720.33	811.333	1391.33	1307.67
25.5	7215	7118	6750	25.5	1848	1612	1730	840	823	774	1388	1561	1225	25.5	7027.67	1730	812.333	1391.33	1311.22
25.6667	7253	7162	6761	25.6667	1853	1609	1724	837	826	772	1391	1558	1233	25.6667	7058.67	1728.67	811.667	1394	1311.44
25.8333	7266	7187	6826	25.8333	1843	1607	1724	838	826	778	1376	1550	1230	25.8333	7093	1724.67	814	1385.33	1308
26	7290	7236	6861	26	1853	1604	1722	838	825	773	1391	1551	1229	26	7129	1726.33	812	1390.33	1309.56
26.1667	7351	7268	6931	26.1667	1845	1605	1727	838	831	773	1390	1554	1234	26.1667	7183.33	1725.67	814	1392.67	1310.78
26.3333	7359	7245	6884	26.3333	1855	1609	1725	848	829	780	1381	1563	1231	26.3333	7162.67	1729.67	819	1391.67	1313.44
26.5	7361	7284	6940	26.5	1854	1604	1729	845	826	775	1382	1561	1237	26.5	7195	1729	815.333	1393.33	1312.56
26.6667	7450	7345	6947	26.6667	1850	1613	1729	853	840	787	1385	1561	1236	26.6667	7247.33	1730.67	826.667	1394	1317.11
26.8333	7433	7344	6971	26.8333	1851	1611	1735	848	826	773	1386	1564	1239	26.8333	7249.33	1732.33	815.667	1396.33	1314.78
27	7408	7304	6984	27	1856	1613	1733	851	832	778	1387	1562	1237	27	7232	1734	820.333	1395.33	1316.56
27.1667	7448	7395	7082	27.1667	1852	1619	1717	848	838	780	1391	1567	1239	27.1667	7308.33	1729.33	822	1399	1316.78
27.3333	7515	7435	7012	27.3333	1846	1611	1726	851	832	780	1392	1558	1240	27.3333	7320.67	1727.67	821	1396.67	1315.11
27.5	7525	7375	7088	27.5	1845	1613	1731	851	838	780	1389	1573	1246	27.5	7329.33	1729.67	823	1402.67	1318.44
27.6667	7573	7389	7115	27.6667	1845	1613	1726	859	835	782	1387	1569	1244	27.6667	7359	1728	825.333	1400	1317.78
27.8333	7529	7437	7118	27.8333	1847	1611	1727	859	838	785	1390	1561	1238	27.8333	7361.33	1728.33	827.333	1396.33	1317.33
28	7605	7433	7137	28	1856	1614	1728	863	840	779	1389	1572	1245	28	7391.67	1732.67	827.333	1402	1320.67
28.1667	7644	7396	7181	28.1667	1848	1613	1740	860	842	784	1385	1571	1249	28.1667	7407	1733.67	828.667	1401.67	1321.33
28.3333	7631	7465	7207	28.3333	1852	1605	1735	868	842	784	1398	1575	1246	28.3333	7434.33	1730.67	831.333	1406.33	1322.78
28.5	7644	7497	7217	28.5	1854	1606	1733	862	848	786	1393	1564	1251	28.5	7452.67	1731	832	1402.67	1321.89
28.6667	7653	7480	7226	28.6667	1851	1617	1728	866	845	785	1395	1569	1245	28.6667	7453	1732	832	1403	1322.33
28.8333	7725	7603	7234	28.8333	1854	1619	1741	873	850	793	1386	1568	1253	28.8333	7520.67	1738	838.667	1402.33	1326.33
29	7720	7593	7280	29	1856	1623	1733	866	841	789	1391	1572	1245	29	7531	1737.33	832	1402.67	1324
29.1667	7728	7589	7288	29.1667	1860	1613	1733	869	840	785				29.1667	7535	1735.33	831.333		1283.33
29.3333	7792	7535	7274	29.3333	1854	1621	1740	874	849	789				29.3333	7533.67	1738.33	837.333		1287.83
29.5	7769	7620	7356	29.5	1850	1612	1738	868	844	792				29.5	7581.67	1733.33	834.667		1284
29.6667	7753	7620	7342	29.6667	1852	1613	1742	881	853	784				29.6667	7571.67	1735.67	839.333		1287.5
29.8333	7758	7612	7343	29.8333	1857	1612	1740	873	847	788				29.8333	7571	1736.33	836		1286.17
30	7767	7666	7393	30	1853	1622	1724	874	850	791				30	7608.67	1733	838.333		1285.67
30.1667	7807	7687	7422	30.1667	1855	1617	1745	877	850	794				30.1667	7638.67	1739	840.333		1289.67
30.3333	7839	7702	7400	30.3333	1856	1608	1743	881	856	796				30.3333	7647	1735.67	844.333		1290
30.5	7818	7678	7464	30.5	1862	1617	1736	883	851	790				30.5	7653.33	1738.33	841.333		1289.83
30.6667	7850	7651	7436	30.6667	1865	1617	1743	882	855	797				30.6667	7645.67	1741.67	844.667		1293.17
30.8333	7843	7686	7516	30.8333	1862	1623	1744	890	849	795				30.8333	7681.67	1743	844.667		1293.83
31	7893	7708	7453	31	1856	1623	1745	890	855	793				31	7684.67	1741.33	846		1293.67
31.1667	7870	7641	7501	31.1667	1867	1619	1744	887	854	798				31.1667	7670.67	1743.33	846.333		1294.83
31.3333	7900	7769	7500	31.3333	1863	1621	1734	891	859	788				31.3333	7723	1739.33	846		1292.67
31.5	7903	7739	7471	31.5	1865	1621	1745	891	857	795				31.5	7704.33	1743.67	847.667		1295.67
31.6667	7884	7726	7508	31.6667	1859	1629	1745	893	862	797				31.6667	7706	1744.33	850.667		1297.5
31.8333	7880	7739	7515	31.8333	1860	1622	1742	899	857	804				31.8333	7711.33	1741.33	853.333		1297.33
32	7931	7758	7536	32	1873	1629	1743	908	858	805				32	7741.67	1748.33	857		1302.67
32.1667	7926	7755	7516	32.1667	1866	1625	1754	901	865	797				32.1667	7732.33	1748.33	854.333		1301.33
32.3333	7969	7749	7540	32.3333	1867	1627	1751							32.3333	7752.67	1748.33			1748.33
32.5	7956	7754	7569	32.5	1868	1621	1755							32.5	7759.67	1748			1748
32.6667	7987	7787	7606	32.6667	1862	1625	1757							32.6667	7793.33	1748			1748
32.8333	7955	7798	7576	32.8333	1868	1634	1754							32.8333	7776.33	1752			1752
33	8019	7822	7609	33	1865	1631	1746							33	7816.67	1747.33			1747.33
33.1667	7990	7778	7610	33.1667	1869	1624	1757							33.1667	7792.67	1750			1750
33.3333	7989	7744	7596	33.3333	1869	1628	1761							33.3333	7776.33	1752.67			1752.67
33.5	8015	7756	7621	33.5	1874	1636	1755							33.5	7797.33	1755			1755
33.6667	7990	7794	7659	33.6667	1879	1629	1761							33.6667	7814.33	1756.33			1756.33
33.8333	7997	7822	7640	33.8333	1873	1632	1757							33.8333	7819.67	1754			1754
34	8003	7797	7642	34	1870	1631	1758							34	7814	1753			1753
34.1667	7965	7835	7594	34.1667	1881	1629	1758							34.1667	7798	1756			1756
34.3333	8004	7782	7633	34.3333	1875	1627	1759							34.3333	7806.33	1753.67			1753.67
34.5	7980	7742	7648	34.5	1878	1629	1762							34.5	7790	1756.33			1756.33
34.6667	7988	7848	7616	34.6667	1878	1636	1762							34.6667	7817.33	1758.67			1758.67
34.8333	7973	7834	7639	34.8333	1877	1623	1767							34.8333	7815.33	1755.67			1755.67
35	8052	7809	7646	35	1878	1638	1767							35	7835.67	1761			1761
35.1667	8049	7814	7666	35.1667	1870	1638	1766							35.1667	7843	1758			1758
35.3333	8003	7897	7631	35.3333	1884	1633	1771							35.3333	7843.67	1762.67			1762.67
35.5	8070	7837	7657	35.5	1876	1641	1761							35.5	7854.67	1759.33			1759.33
	8067	7869	7676	35.6667	1879	1634	1774							35.6667	7870.67	1762.33			1762.33
	8113	7833	7675	35.8333	1884	1642	1775							35.8333	7873.67	1767			1767
	8066	7850	7682	36	1887	1641	1780							36	7866	1769.33			1769.33
	8065	7853	7696	36.1667	1895	1642	1781							36.1667	7871.33	1772.67			1772.67
	8061	7829	7662	36.3333	1890	1641	1782							36.3333	7850.67	1771			1771
	8063	7875	7656	36.5	1886	1633	1779							36.5	7864.67	1766			1766
	8075	7875	7672	36.6667	1882	1646	1785							36.6667	7874	1771			1771
	8088	7889	7705	36.8333	1892	1634	1781							36.8333	7894	1769			1769
	8100	7902	7734	37	1886	1645	1778							37	7912	1769.67			1769.67
	8068	7813	7697	37.1667	1885	1645	1776							37.1667	7859.33	1768.67			1768.67
	8058	7870	7735	37.3333	1883	1647	1781							37.3333	7887.67	1770.33			1770.33
	8107	7852	7734	37.5	1893	1657	1784							37.5	7897.67	1778			1778
	8099	7868	7725	37.6667	1885	1648	1783							37.6667	7897.33	1772			1772
	8087	7856	7767	37.8333	1888	1646	1781							37.8333	7903.33	1771.67			1771.67
	8054	7900	7691	38	1888	1647	1780							38	7881.67	1771.67			1771.67
	8088	7844	7707	38.1667	1901	1651	1787							38.1667	7879.67	1779.67			1779.67
	8118	7864	7778	38.3333	1899	1651	1788							38.3333	7920	1779.33			1779.33
	8054	7822	7718	38.5	1879	1640	1778							38.5	7864.67	1765.67			1765.67
	8092	7916	7704	38.6667	1872	1628	1770							38.6667	7904	1756.67			1756.67
	8005	7877	7731	38.8333	1872	1633	1769							38.8333	7871	1758			1758
	8072	7844	7732	39	1887	1636	1775							39	7882.67	1766			1766
	8089	7870	7717	39.1667	1876	1627	1777							39.1667	7892	1760			1760
	8073	7857	7755	39.3333	1880	1628	1773							39.3333	7895	1760.33			1760.33
	8112	7901	7771	39.5	1874	1635	1770							39.5	7928	1759.67			1759.67
	8074	7853	7729	39.6667	1880	1636	1770							39.6667	7885.33	1762			1762
	8066	7843	7763	39.8333	1876	1636	1777							39.8333	7890.67	1763			1763
	8095	7881	7785	40	1889	1632	1787							40	7920.33	1769.33			1769.33
	8111	7882	7766	40.1667	1883	1632	1785							40.1667	7919.67	1766.67			1766.67
	8071	7895	7755	40.3333	1890	1641	1773							40.3333	7907	1768			1768
	8112	7861	7717	40.5	1886	1637	1782							40.5	7896.67	1768.33			1768.33
	8069	7837	7765	40.6667	1893	1631	1779							40.6667	7890.33	1767.67			1767.67
	8107	7875	7812	40.8333	1887	1643	1793							40.8333	7931.33	1774.33			1774.33
	8125	7852	7717	41	1889	1645	1785							41	7898	1773			1773
	8149	7842	7790	41.1667	1893	1638	1792							41.1667	7927	1774.33			1774.33
	8112	7855	7803	41.3333	1896	1648	1780							41.3333	7923.33	1774.67			1774.67
	8134	7873	7790	41.5	1898	1637	1792							41.5	7932.33	1775.67			1775.67
	8085	7892	7754	41.6667	1887	1650	1798							41.6667	7910.33	1778.33			1778.33
	8121	7929	7754	41.8333	1897	1650	1790							41.8333	7934.67	1779			1779
	8047	7894	7785	42	1900	1658	1791							42	7908.67	1783			1783
	8117	7829	7730	42.1667	1906	1649	1798							42.1667	7892	1784.33			1784.33
	8126	7905	7754	42.3333	1912	1651	1792							42.3333	7928.33	1785			1785
	8126	7870	7769	42.5	1899	1656	1806							42.5	7921.67	1787			1787
	8114	7842	7804	42.6667	1906	1654	1792							42.6667	7920	1784			1784
	8123	7851	7744	42.8333	1898	1660	1798							42.8333	7906	1785.33			1785.33
	8115	7870	7771	43	1905	1656	1803							43	7918.67	1788			1788
	8093	7890	7777	43.1667	1907	1657	1799							43.1667	7920	1787.67			1787.67
	8144	7869	7752	43.3333	1908	1648	1797							43.3333	7921.67	1784.33			1784.33
	8170	7891	7809	43.5	1909	1653	1805							43.5	7956.67	1789			1789
	8132	7863	7779	43.6667	1905	1661	1807							43.6667	7924.67	1791			1791
	8173	7853	7776	43.8333	1913	1653	1802							43.8333	7934	1789.33			1789.33
	8127	7856	7810	44	1912	1655	1810							44	7931	1792.33			1792.33
	8145	7913	7796											44.1667	7951.33
	8135	7845	7822											44.3333	7934
	8161	7902	7852											44.5	7971.67
	8145	7893	7812											44.6667	7950
	8137	7883	7771											44.8333	7930.33
	8173	7877	7787											45	7945.67
	8180	7935	7819											45.1667	7978
	8213	7849	7791											45.3333	7951
	8150	7904	7775											45.5	7943
	8162	7934	7770											45.6667	7955.33
	8164	7907	7825											45.8333	7965.33
	8164	7877	7788											46	7943
	8155	7874	7761											46.1667	7930
	8158	7891	7858											46.3333	7969

## Sheet: PSMB2
0.25 mg/mL PSMβ2 monomers in the absence and presence of seeds of the other PSM peptides
Raw data														Averaged data
Time (h)	Unseeded	Unseeded	Unseeded	Time (h)	PSMα1 seeds	PSMα1 seeds	PSMα1 seeds	PSMα3 seeds	PSMα3 seeds	PSMα3 seeds	PSMβ1 seeds	PSMβ1 seeds	PSMβ1 seeds	Time (h)	Unseeded	PSMα1 seeds	PSMα3 seeds	PSMβ1 seeds
0	581	606	587	0	2846	2039	1799	402	400	431	2972	3036	2907	0	591.333	2228	411	2971.67
0.166667	617	712	634	0.166667	2205	1501	1326	308	330	467	2966	3129	2953	0.166667	654.333	1677.33	368.333	3016
0.333333	691	769	761	0.333333	1974	1286	1142	276	298	353	3093	3676	3406	0.333333	740.333	1467.33	309	3391.67
0.5	765	814	825	0.5	1807	1190	1076	279	297	335	3422	4310	3997	0.5	801.333	1357.67	303.667	3909.67
0.666667	821	847	881	0.666667	1710	1156	1055	288	298	341	3854	4804	4506	0.666667	849.667	1307	309	4388
0.833333	866	879	925	0.833333	1648	1159	1056	300	315	351	4312	5211	4931	0.833333	890	1287.67	322	4818
1	900	915	952	1	1624	1170	1076	313	331	360	4739	5570	5277	1	922.333	1290	334.667	5195.33
1.16667	916	939	981	1.16667	1596	1203	1099	324	336	367	5065	5856	5545	1.16667	945.333	1299.33	342.333	5488.67
1.33333	939	972	1008	1.33333	1604	1230	1135	332	348	380	5396	6113	5819	1.33333	973	1323	353.333	5776
1.5	966	998	1023	1.5	1594	1272	1166	341	357	389	5699	6260	5989	1.5	995.667	1344	362.333	5982.67
1.66667	989	1037	1060	1.66667	1610	1302	1197	355	365	396	5917	6425	6113	1.66667	1028.67	1369.67	372	6151.67
1.83333	1010	1073	1078	1.83333	1612	1341	1235	358	368	404	6180	6556	6288	1.83333	1053.67	1396	376.667	6341.33
2	1029	1103	1093	2	1630	1391	1268	365	379	413	6340	6695	6392	2	1075	1429.67	385.667	6475.67
2.16667	1046	1130	1108	2.16667	1655	1421	1302	372	381	413	6540	6792	6525	2.16667	1094.67	1459.33	388.667	6619
2.33333	1069	1164	1125	2.33333	1670	1464	1331	379	387	416	6695	6859	6581	2.33333	1119.33	1488.33	394	6711.67
2.5	1084	1206	1136	2.5	1680	1498	1373	377	388	426	6810	6926	6622	2.5	1142	1517	397	6786
2.66667	1104	1232	1145	2.66667	1703	1534	1391	385	392	425	6885	6964	6686	2.66667	1160.33	1542.67	400.667	6845
2.83333	1114	1258	1142	2.83333	1721	1551	1416	393	397	430	7031	7009	6776	2.83333	1171.33	1562.67	406.667	6938.67
3	1128	1273	1160	3	1737	1588	1455	396	400	436	7071	7085	6841	3	1187	1593.33	410.667	6999
3.16667	1155	1294	1164	3.16667	1760	1609	1489	396	406	439	7190	7150	6919	3.16667	1204.33	1619.33	413.667	7086.33
3.33333	1174	1304	1171	3.33333	1779	1641	1499	395	401	436	7286	7180	7003	3.33333	1216.33	1639.67	410.667	7156.33
3.5	1185	1325	1186	3.5	1802	1657	1522	398	409	443	7337	7307	7057	3.5	1232	1660.33	416.667	7233.67
3.66667	1189	1334	1187	3.66667	1813	1679	1550	402	408	442	7384	7396	7143	3.66667	1236.67	1680.67	417.333	7307.67
3.83333	1205	1353	1195	3.83333	1828	1695	1549	402	408	444	7477	7558	7377	3.83333	1251	1690.67	418	7470.67
4	1214	1364	1198	4	1851	1713	1575	400	404	453	7497	7737	7539	4	1258.67	1713	419	7591
4.16667	1223	1373	1204	4.16667	1857	1722	1588	403	401	449	7537	7907	7744	4.16667	1266.67	1722.33	417.667	7729.33
4.33333	1236	1385	1215	4.33333	1866	1738	1602	403	396	447	7555	8118	7983	4.33333	1278.67	1735.33	415.333	7885.33
4.5	1244	1386	1215	4.5	1891	1753	1620	400	390	454	7642	8333	8210	4.5	1281.67	1754.67	414.667	8061.67
4.66667	1249	1404	1222	4.66667	1903	1757	1628	405	389	457	7640	8454	8295	4.66667	1291.67	1762.67	417	8129.67
4.83333	1269	1404	1237	4.83333	1909	1771	1645	397	389	452	7729	8437	8342	4.83333	1303.33	1775	412.667	8169.33
5	1274	1414	1228	5	1928	1780	1648	400	384	459	7735	8448	8326	5	1305.33	1785.33	414.333	8169.67
5.16667	1283	1427	1234	5.16667	1932	1785	1658	395	387	460	7768	8553	8358	5.16667	1314.67	1791.67	414	8226.33
5.33333	1286	1433	1242	5.33333	1944	1791	1669	385	381	455	7801	8616	8503	5.33333	1320.33	1801.33	407	8306.67
5.5	1292	1426	1254	5.5	1956	1793	1684	385	388	460	7790	8632	8516	5.5	1324	1811	411	8312.67
5.66667	1297	1439	1253	5.66667	1959	1805	1681	388	386	465	7806	8704	8554	5.66667	1329.67	1815	413	8354.67
5.83333	1304	1451	1256	5.83333	1968	1812	1691	387	388	459	7810	8732	8698	5.83333	1337	1823.67	411.333	8413.33
6	1304	1454	1257	6	1978	1819	1700	386	387	461	7901	8798	8730	6	1338.33	1832.33	411.333	8476.33
6.16667	1312	1456	1267	6.16667	1979	1819	1698	387	391	455	7887	8822	8727	6.16667	1345	1832	411	8478.67
6.33333	1314	1464	1262	6.33333	1979	1821	1705	387	387	462	7865	8821	8841	6.33333	1346.67	1835	412	8509
6.5	1316	1464	1273	6.5	1981	1824	1711	385	386	462	7927	8862	9074	6.5	1351	1838.67	411	8621
6.66667	1326	1471	1272	6.66667	1998	1828	1714	394	390	459	7949	8925	8896	6.66667	1356.33	1846.67	414.333	8590
6.83333	1328	1492	1281	6.83333	1997	1828	1718	397	393	459	7991	8936	8924	6.83333	1367	1847.67	416.333	8617
7	1325	1487	1280	7	2016	1839	1723	395	389	463	8004	8965	8947	7	1364	1859.33	415.667	8638.67
7.16667	1338	1486	1278	7.16667	2012	1834	1729	399	389	455	8021	8976	9057	7.16667	1367.33	1858.33	414.333	8684.67
7.33333	1331	1496	1290	7.33333	2006	1847	1735	399	394	460	8015	8977	9164	7.33333	1372.33	1862.67	417.667	8718.67
7.5	1336	1502	1296	7.5	2022	1851	1732	407	398	456	8092	9036	9152	7.5	1378	1868.33	420.333	8760
7.66667	1346	1510	1301	7.66667	2021	1852	1743	411	401	458	8109	9063	9250	7.66667	1385.67	1872	423.333	8807.33
7.83333	1350	1512	1300	7.83333	2036	1849	1750	414	406	454	8162	9068	9271	7.83333	1387.33	1878.33	424.667	8833.67
8	1348	1517	1304	8	2028	1856	1750	415	410	464	8270	9084	9379	8	1389.67	1878	429.667	8911
8.16667	1348	1521	1303	8.16667	2031	1866	1751	418	411	456	8371	9074	9430	8.16667	1390.67	1882.67	428.333	8958.33
8.33333	1366	1532	1315	8.33333	2039	1865	1759	429	414	465	8481	9129	9436	8.33333	1404.33	1887.67	436	9015.33
8.5	1360	1533	1310	8.5	2038	1866	1762	432	425	465	8590	9167	9593	8.5	1401	1888.67	440.667	9116.67
8.66667	1374	1538	1313	8.66667	2047	1858	1759	438	430	469	8716	9176	9791	8.66667	1408.33	1888	445.667	9227.67
8.83333	1374	1544	1316	8.83333	2041	1873	1759	446	432	470	8864	9201	9966	8.83333	1411.33	1891	449.333	9343.67
9	1376	1551	1317	9	2042	1869	1767	455	447	481	8998	9155	10060	9	1414.67	1892.67	461	9404.33
9.16667	1377	1557	1321	9.16667	2042	1876	1756	465	458	489	9054	9208	10099	9.16667	1418.33	1891.33	470.667	9453.67
9.33333	1378	1561	1327	9.33333	2056	1878	1772	480	458	494	9126	9220	10074	9.33333	1422	1902	477.333	9473.33
9.5	1378	1568	1335	9.5	2053	1866	1781	490	473	500	9183	9234	10148	9.5	1427	1900	487.667	9521.67
9.66667	1380	1567	1339	9.66667	2055	1888	1770	506	484	501	9179	9361	10225	9.66667	1428.67	1904.33	497	9588.33
9.83333	1380	1578	1347	9.83333	2062	1881	1776	534	495	510	9245	9308	10257	9.83333	1435	1906.33	513	9603.33
10	1387	1582	1352	10	2055	1887	1785	557	509	517	9296	9341	10217	10	1440.33	1909	527.667	9618
10.1667	1392	1588	1360	10.1667	2063	1890	1779	595	518	532	9305	9334	10315	10.1667	1446.67	1910.67	548.333	9651.33
10.3333	1405	1588	1369	10.3333	2064	1891	1789	623	537	536	9323	9363	10410	10.3333	1454	1914.67	565.333	9698.67
10.5	1404	1603	1374	10.5	2073	1887	1782	664	554	550	9381	9448	10496	10.5	1460.33	1914	589.333	9775
10.6667	1407	1609	1380	10.6667	2079	1899	1788	721	584	554	9391	9424	10533	10.6667	1465.33	1922	619.667	9782.67
10.8333	1410	1608	1385	10.8333	2074	1900	1799	766	615	571	9418	9437	10525	10.8333	1467.67	1924.33	650.667	9793.33
11	1410	1625	1389	11	2075	1897	1794	812	660	577	9406	9513	10552	11	1474.67	1922	683	9823.67
11.1667	1424	1618	1394	11.1667	2084	1908	1792	856	700	597	9477	9504	10615	11.1667	1478.67	1928	717.667	9865.33
11.3333	1421	1625	1395	11.3333	2087	1917	1790	898	735	618	9472	9511	10594	11.3333	1480.33	1931.33	750.333	9859
11.5	1422	1623	1395	11.5	2077	1910	1794	951	781	633	9453	9533	10663	11.5	1480	1927	788.333	9883
11.6667	1430	1638	1410	11.6667	2082	1916	1803	980	834	659	9477	9521	10654	11.6667	1492.67	1933.67	824.333	9884
11.8333	1433	1640	1406	11.8333	2082	1909	1805	1020	883	680	9507	9579	10752	11.8333	1493	1932	861	9946
12	1436	1653	1406	12	2083	1916	1797	1053	939	715	9520	9559	10758	12	1498.33	1932	902.333	9945.67
12.1667	1447	1660	1403	12.1667	2086	1909	1812	1071	992	751	9531	9605	10792	12.1667	1503.33	1935.67	938	9976
12.3333	1446	1665	1404	12.3333	2086	1907	1806	1106	1036	782	9591	9624	10788	12.3333	1505	1933	974.667	10001
12.5	1440	1667	1409	12.5	2092	1920	1808	1125	1086	809	9641	9645	10852	12.5	1505.33	1940	1006.67	10046
12.6667	1461	1666	1407	12.6667	2095	1923	1810	1150	1140	849	9654	9703	10933	12.6667	1511.33	1942.67	1046.33	10096.7
12.8333	1463	1676	1410	12.8333	2091	1919	1818	1179	1183	888	9593	9672	10917	12.8333	1516.33	1942.67	1083.33	10060.7
13	1459	1681	1420	13	2106	1924	1817	1213	1220	922	9624	9740	10985	13	1520	1949	1118.33	10116.3
13.1667	1462	1684	1416	13.1667	2098	1925	1819	1233	1256	962	9650	9715	11033	13.1667	1520.67	1947.33	1150.33	10132.7
13.3333	1467	1686	1424	13.3333	2102	1923	1818	1260	1286	1004	9661	9743	11006	13.3333	1525.67	1947.67	1183.33	10136.7
13.5	1480	1698	1420	13.5	2098	1931	1821	1289	1315	1047	9700	9701	11122	13.5	1532.67	1950	1217	10174.3
13.6667	1484	1712	1430	13.6667	2101	1930	1820	1302	1352	1076	9695	9765	11165	13.6667	1542	1950.33	1243.33	10208.3
13.8333	1474	1705	1441	13.8333	2098	1933	1820	1325	1390	1123	9669	9809	11118	13.8333	1540	1950.33	1279.33	10198.7
14	1483	1707	1454	14	2109	1935	1824	1350	1415	1161	9738	9831	11185	14	1548	1956	1308.67	10251.3
14.1667	1486	1721	1466	14.1667	2102	1931	1822	1370	1445	1213	9752	9875	11164	14.1667	1557.67	1951.67	1342.67	10263.7
14.3333	1488	1721	1464	14.3333	2098	1940	1826	1383	1472	1257	9774	9860	11211	14.3333	1557.67	1954.67	1370.67	10281.7
14.5	1504	1725	1475	14.5	2111	1938	1831	1407	1496	1275	9782	9856	11326	14.5	1568	1960	1392.67	10321.3
14.6667	1495	1736	1472	14.6667	2102	1942	1829	1421	1527	1328	9790	9853	11338	14.6667	1567.67	1957.67	1425.33	10327
14.8333	1514	1729	1475	14.8333	2110	1933	1837	1461	1546	1364	9802	9891	11386	14.8333	1572.67	1960	1457	10359.7
15	1510	1727	1476	15	2108	1940	1838	1464	1571	1413	9878	9885	11415	15	1571	1962	1482.67	10392.7
15.1667	1516	1739	1482	15.1667	2104	1937	1826	1488	1606	1455	9835	9965	11410	15.1667	1579	1955.67	1516.33	10403.3
15.3333	1518	1736	1479	15.3333	2115	1944	1836	1504	1633	1495	9812	9953	11482	15.3333	1577.67	1965	1544	10415.7
15.5	1517	1749	1482	15.5	2116	1947	1835	1520	1664	1526	9840	9990	11460	15.5	1582.67	1966	1570	10430
15.6667	1527	1749	1484	15.6667	2104	1948	1844	1540	1690	1562	9885	10042	11529	15.6667	1586.67	1965.33	1597.33	10485.3
15.8333	1527	1763	1493	15.8333	2115	1959	1838	1555	1730	1611	9922	9998	11565	15.8333	1594.33	1970.67	1632	10495
16	1538	1764	1480	16	2119	1943	1838	1574	1763	1644	9924	10020	11631	16	1594	1966.67	1660.33	10525
16.1667	1542	1767	1491	16.1667	2111	1944	1835	1601	1799	1679	9888	10020	11645	16.1667	1600	1963.33	1693	10517.7
16.3333	1541	1774	1496	16.3333	2115	1949	1844	1631	1829	1721	9983	10036	11614	16.3333	1603.67	1969.33	1727	10544.3
16.5	1545	1779	1492	16.5	2109	1957	1844	1649	1866	1753	10002	10081	11663	16.5	1605.33	1970	1756	10582
16.6667	1550	1783	1494	16.6667	2110	1953	1842	1658	1895	1789	9996	10060	11681	16.6667	1609	1968.33	1780.67	10579
16.8333	1560	1795	1501	16.8333	2116	1949	1847	1692	1929	1808	10064	10134	11774	16.8333	1618.67	1970.67	1809.67	10657.3
17	1553	1795	1509	17	2113	1951	1844	1696	1952	1849	10055	10175	11761	17	1619	1969.33	1832.33	10663.7
17.1667	1568	1797	1500	17.1667	2116	1959	1852	1714	1988	1872	10137	10134	11801	17.1667	1621.67	1975.67	1858	10690.7
17.3333	1573	1794	1507	17.3333	2119	1956	1856	1721	2030	1901	10099	10212	11802	17.3333	1624.67	1977	1884	10704.3
17.5	1574	1792	1512	17.5	2122	1966	1851	1736	2049	1916	10115	10142	11879	17.5	1626	1979.67	1900.33	10712
17.6667	1580	1801	1511	17.6667	2121	1961	1840	1734	2089	1944	10183	10172	11894	17.6667	1630.67	1974	1922.33	10749.7
17.8333	1583	1810	1507	17.8333	2119	1959	1843	1751	2118	1967	10140	10203	11938	17.8333	1633.33	1973.67	1945.33	10760.3
18	1586	1813	1516	18	2121	1958	1858	1765	2153	1988	10175	10201	12014	18	1638.33	1979	1968.67	10796.7
18.1667	1589	1815	1513	18.1667	2129	1958	1846	1777	2186	2009	10132	10258	11995	18.1667	1639	1977.67	1990.67	10795
18.3333	1599	1819	1507	18.3333	2118	1958	1844	1798	2202	2025	10207	10237	12067	18.3333	1641.67	1973.33	2008.33	10837
18.5	1596	1827	1504	18.5	2119	1959	1850	1808	2226	2042	10202	10232	12017	18.5	1642.33	1976	2025.33	10817
18.6667	1605	1825	1500	18.6667	2121	1963	1854	1818	2246	2072	10248	10266	12006	18.6667	1643.33	1979.33	2045.33	10840
18.8333	1609	1832	1509	18.8333	2122	1961	1855	1833	2273	2083	10226	10264	12101	18.8333	1650	1979.33	2063	10863.7
19	1604	1834	1512	19	2118	1960	1846	1843	2299	2103	10215	10261	12108	19	1650	1974.67	2081.67	10861.3
19.1667	1616	1826	1518	19.1667	2125	1965	1860	1846	2318	2105	10268	10322	12154	19.1667	1653.33	1983.33	2089.67	10914.7
19.3333	1623	1834	1509	19.3333	2125	1964	1862	1876	2352	2125	10271	10301	12223	19.3333	1655.33	1983.67	2117.67	10931.7
19.5	1626	1837	1522	19.5	2125	1964	1850	1873	2373	2144	10243	10358	12162	19.5	1661.67	1979.67	2130	10921
19.6667	1630	1853	1527	19.6667	2126	1968	1855	1879	2396	2151	10315	10361	12268	19.6667	1670	1983	2142	10981.3
19.8333	1635	1846	1513	19.8333	2125	1964	1857	1897	2410	2170	10303	10381	12202	19.8333	1664.67	1982	2159	10962
20	1635	1853	1521	20	2128	1970	1851	1903	2428	2177	10405	10368	12260	20	1669.67	1983	2169.33	11011
20.1667	1648	1857	1530	20.1667	2136	1977	1861	1909	2441	2197	10361	10413	12324	20.1667	1678.33	1991.33	2182.33	11032.7
20.3333	1647	1872	1527	20.3333	2117	1969	1869	1921	2471	2212	10398	10453	12306	20.3333	1682	1985	2201.33	11052.3
20.5	1646	1870	1535	20.5	2124	1971	1857	1932	2490	2219	10402	10416	12410	20.5	1683.67	1984	2213.67	11076
20.6667	1660	1866	1530	20.6667	2126	1979	1855	1949	2496	2241	10384	10458	12425	20.6667	1685.33	1986.67	2228.67	11089
20.8333	1658	1872	1534	20.8333	2134	1977	1870	1960	2518	2245	10380	10437	12433	20.8333	1688	1993.67	2241	11083.3
21	1671	1874	1541	21	2132	1977	1860	1964	2536	2261	10453	10451	12467	21	1695.33	1989.67	2253.67	11123.7
21.1667	1671	1881	1539	21.1667	2132	1976	1864	1982	2543	2272	10473	10536	12499	21.1667	1697	1990.67	2265.67	11169.3
21.3333	1674	1896	1539	21.3333	2120	1968	1865	1982	2564	2284	10487	10472	12478	21.3333	1703	1984.33	2276.67	11145.7
21.5	1679	1881	1542	21.5	2122	1965	1869	1991	2580	2282	10447	10545	12572	21.5	1700.67	1985.33	2284.33	11188
21.6667	1684	1891	1538	21.6667	2127	1977	1871	1996	2597	2301	10486	10509	12604	21.6667	1704.33	1991.67	2298	11199.7
21.8333	1686	1896	1542	21.8333	2136	1977	1869	2011	2613	2310	10487	10543	12596	21.8333	1708	1994	2311.33	11208.7
22	1689	1888	1549	22	2135	1978	1867	2017	2629	2309	10515	10539	12622	22	1708.67	1993.33	2318.33	11225.3
22.1667	1688	1907	1551	22.1667	2128	1981	1872	2031	2662	2324	10504	10595	12621	22.1667	1715.33	1993.67	2339	11240
22.3333	1693	1913	1550	22.3333	2127	1980	1865	2028	2669	2344	10516	10598	12679	22.3333	1718.67	1990.67	2347	11264.3
22.5	1701	1911	1555	22.5	2125	1992	1867	2046	2690	2356	10554	10611	12653	22.5	1722.33	1994.67	2364	11272.7
22.6667	1704	1909	1553	22.6667	2132	1980	1871	2045	2698	2372	10560	10654	12684	22.6667	1722	1994.33	2371.67	11299.3
22.8333	1712	1909	1558	22.8333	2132	1968	1880	2054	2717	2372	10561	10659	12717	22.8333	1726.33	1993.33	2381	11312.3
23	1718	1926	1563	23	2137	1986	1871	2067	2734	2386	10593	10621	12784	23	1735.67	1998	2395.67	11332.7
23.1667	1716	1916	1552	23.1667	2128	1975	1865	2065	2742	2386	10640	10639	12766	23.1667	1728	1989.33	2397.67	11348.3
23.3333	1715	1915	1563	23.3333	2131	1981	1866	2084	2767	2399	10602	10676	12782	23.3333	1731	1992.67	2416.67	11353.3
23.5	1725	1931	1565	23.5	2136	1979	1871	2084	2777	2409	10632	10656	12811	23.5	1740.33	1995.33	2423.33	11366.3
23.6667	1739	1923	1557	23.6667	2138	1984	1870	2084	2787	2424	10640	10690	12876	23.6667	1739.67	1997.33	2431.67	11402
23.8333	1736	1930	1565	23.8333	2137	1989	1877	2095	2798	2436	10620	10714	12862	23.8333	1743.67	2001	2443	11398.7
24	1736	1940	1570	24	2134	1987	1878	2092	2808	2424	10654	10688	12921	24	1748.67	1999.67	2441.33	11421
24.1667	1749	1935	1569	24.1667	2143	1985	1874	2111	2817	2437	10713	10737	12965	24.1667	1751	2000.67	2455	11471.7
24.3333	1748	1947	1580	24.3333	2142	1991	1874	2108	2835	2447	10701	10719	12977	24.3333	1758.33	2002.33	2463.33	11465.7
24.5	1752	1937	1574	24.5	2143	1987	1874	2105	2835	2460	10712	10791	13011	24.5	1754.33	2001.33	2466.67	11504.7
24.6667	1757	1951	1572	24.6667	2146	1984	1871	2122	2858	2478	10734	10770	13015	24.6667	1760	2000.33	2486	11506.3
24.8333	1754	1953	1581	24.8333	2138	1986	1884	2109	2865	2472	10737	10774	13068	24.8333	1762.67	2002.67	2482	11526.3
25	1766	1958	1577	25	2134	1988	1883	2121	2864	2490	10820	10773	13054	25	1767	2001.67	2491.67	11549
25.1667	1772	1953	1572	25.1667	2136	1994	1886	2126	2879	2493	10807	10767	13077	25.1667	1765.67	2005.33	2499.33	11550.3
25.3333	1772	1957	1579	25.3333	2141	1988	1882	2128	2892	2497	10785	10847	13061	25.3333	1769.33	2003.67	2505.67	11564.3
25.5	1779	1957	1582	25.5	2131	1988	1882	2138	2923	2500	10824	10850	13149	25.5	1772.67	2000.33	2520.33	11607.7
25.6667	1788	1967	1580	25.6667	2139	1987	1880	2138	2922	2504	10811	10822	13207	25.6667	1778.33	2002	2521.33	11613.3
				25.8333	2140	1995	1879	2164	2927	2529	10842	10872	13229	25.8333		2004.67	2540	11647.7
				26	2140	1997	1878	2154	2936	2525	10900	10851	13216	26		2005	2538.33	11655.7
				26.1667	2134	1997	1878	2148	2967	2518	10821	10878	13203	26.1667		2003	2544.33	11634
				26.3333	2136	1990	1883	2164	2966	2525	10868	10848	13273	26.3333		2003	2551.67	11663
				26.5	2142	1996	1884	2157	2965	2540	10870	10905	13270	26.5		2007.33	2554	11681.7
				26.6667	2144	1992	1887	2168	2980	2551	10930	10901	13310	26.6667		2007.67	2566.33	11713.7
				26.8333	2146	2000	1887	2175	2990	2554	10876	10879	13327	26.8333		2011	2573	11694
				27	2142	1998	1891	2168	2990	2572	10899	10983	13337	27		2010.33	2576.67	11739.7
				27.1667	2143	1997	1882	2178	3007	2584	10970	10941	13426	27.1667		2007.33	2589.67	11779
				27.3333	2142	2003	1887	2184	3024	2592	10956	10998	13386	27.3333		2010.67	2600	11780
				27.5	2155	1997	1888	2185	3024	2584	10979	10948	13455	27.5		2013.33	2597.67	11794
				27.6667	2140	1996	1889	2190	3027	2600	10960	11011	13474	27.6667		2008.33	2605.67	11815
				27.8333	2136	1996	1885	2184	3051	2614	11008	10995	13414	27.8333		2005.67	2616.33	11805.7
				28	2142	1998	1884	2195	3051	2616	10981	11009	13470	28		2008	2620.67	11820
				28.1667	2139	2002	1886	2207	3051	2609	10934	10999	13497	28.1667		2009	2622.33	11810
				28.3333	2140	1997	1900	2204	3059	2615	11042	10998	13537	28.3333		2012.33	2626	11859
				28.5	2153	2011	1879	2205	3073	2632	11045	11074	13526	28.5		2014.33	2636.67	11881.7
				28.6667	2137	1997	1894	2207	3091	2635	11057	11049	13570	28.6667		2009.33	2644.33	11892
				28.8333	2141	2005	1882	2216	3080	2644	11070	11054	13546	28.8333		2009.33	2646.67	11890
				29	2135	1992	1890	2221	3108	2651	11067	11056	13588	29		2005.67	2660	11903.7
				29.1667	2137	1999	1898	2221	3112	2646	11086	11115	13637	29.1667		2011.33	2659.67	11946
				29.3333	2141	2004	1888	2224	3122	2658	11085	11108	13697	29.3333		2011	2668	11963.3
				29.5	2137	2008	1889	2237	3131	2664	11126	11143	13667	29.5		2011.33	2677.33	11978.7
				29.6667	2149	2001	1879	2225	3135	2664	11160	11109	13661	29.6667		2009.67	2674.67	11976.7
				29.8333	2137	1999	1890	2224	3135	2678	11134	11187	13727	29.8333		2008.67	2679	12016
				30	2145	2014	1891	2237	3152	2696	11204	11158	13747	30		2016.67	2695	12036.3
				30.1667	2153	2008	1894	2241	3147	2692	11169	11172	13705	30.1667		2018.33	2693.33	12015.3
				30.3333	2144	2014	1894	2240	3158	2700	11176	11169	13802	30.3333		2017.33	2699.33	12049
				30.5	2142	2001	1898	2243	3178	2705	11240	11233	13790	30.5		2013.67	2708.67	12087.7
				30.6667	2144	2017	1897	2248	3180	2725	11178	11273	13739	30.6667		2019.33	2717.67	12063.3
				30.8333	2138	2007	1893	2239	3177	2734	11155	11298	13824	30.8333		2012.67	2716.67	12092.3
				31	2142	2011	1899	2245	3178	2734	11275	11298	13838	31		2017.33	2719	12137
				31.1667	2146	2006	1900	2248	3208	2736	11217	11293	13890	31.1667		2017.33	2730.67	12133.3
				31.3333	2146	2004	1894	2250	3196	2748	11244	11330	13900	31.3333		2014.67	2731.33	12158
				31.5	2140	2007	1896	2254	3213	2746	11259	11381	13936	31.5		2014.33	2737.67	12192
				31.6667	2161	1998	1902	2263	3225	2747	11280	11369	13924	31.6667		2020.33	2745	12191
				31.8333	2146	2009	1904	2262	3232	2776	11286	11407	13941	31.8333		2019.67	2756.67	12211.3
				32	2144	2013	1896	2265	3243	2788	11317	11372	14010	32		2017.67	2765.33	12233
				32.1667	2140	2010	1906	2267	3244	2781				32.1667		2018.67	2764
				32.3333	2142	2014	1899							32.3333		2018.33
				32.5	2150	2011	1899							32.5		2020
				32.6667	2143	2026	1907							32.6667		2025.33
				32.8333	2142	2022	1909							32.8333		2024.33
				33	2154	2017	1902							33		2024.33
				33.1667	2142	2006	1900							33.1667		2016
				33.3333	2150	2024	1902							33.3333		2025.33
				33.5	2134	2016	1894							33.5		2014.67
				33.6667	2150	2011	1912							33.6667		2024.33
				33.8333	2151	2018	1904							33.8333		2024.33
				34	2146	2016	1904							34		2022
				34.1667	2156	2021	1902							34.1667		2026.33
				34.3333	2145	2017	1900							34.3333		2020.67
				34.5	2151	2014	1907							34.5		2024
				34.6667	2148	2033	1901							34.6667		2027.33
				34.8333	2140	2013	1899							34.8333		2017.33
				35	2143	2019	1911							35		2024.33
				35.1667	2155	2023	1903							35.1667		2027
				35.3333	2149	2028	1906							35.3333		2027.67
				35.5	2151	2031	1909							35.5		2030.33
				35.6667	2149	2024	1905							35.6667		2026
				35.8333	2139	2026	1908							35.8333		2024.33
				36	2153	2019	1903							36		2025
				36.1667	2151	2030	1899							36.1667		2026.67
				36.3333	2151	2024	1910							36.3333		2028.33
				36.5	2154	2028	1912							36.5		2031.33
				36.6667	2156	2020	1912							36.6667		2029.33
				36.8333	2156	2023	1914							36.8333		2031
				37	2149	2021	1907							37		2025.67
				37.1667	2152	2028	1907							37.1667		2029
				37.3333	2156	2032	1917							37.3333		2035
				37.5	2150	2023	1911							37.5		2028
				37.6667	2151	2025	1917							37.6667		2031
				37.8333	2147	2028	1914							37.8333		2029.67
				38	2144	2036	1911							38		2030.33
				38.1667	2142	2030	1908							38.1667		2026.67
				38.3333	2154	2032	1917							38.3333		2034.33
				38.5	2157	2038	1912							38.5		2035.67
				38.6667	2147	2018	1910							38.6667		2025
				38.8333	2138	2022	1912							38.8333		2024
				39	2131	2025	1896							39		2017.33
				39.1667	2132	2021	1901							39.1667		2018
				39.3333	2130	2014	1899							39.3333		2014.33
				39.5	2143	2024	1904							39.5		2023.67
				39.6667	2136	2014	1903							39.6667		2017.67
				39.8333	2137	2019	1903							39.8333		2019.67
				40	2145	2014	1901							40		2020
				40.1667	2141	2031	1905							40.1667		2025.67
				40.3333	2136	2025	1906							40.3333		2022.33
				40.5	2137	2033	1908							40.5		2026
				40.6667	2129	2021	1913							40.6667		2021
				40.8333	2140	2032	1907							40.8333		2026.33
				41	2136	2032	1902							41		2023.33
				41.1667	2138	2023	1915							41.1667		2025.33
				41.3333	2137	2030	1909							41.3333		2025.33
				41.5	2136	2018	1910							41.5		2021.33
				41.6667	2141	2035	1911							41.6667		2029
				41.8333	2138	2024	1902							41.8333		2021.33
				42	2141	2034	1907							42		2027.33
				42.1667	2131	2032	1909							42.1667		2024
				42.3333	2131	2026	1899							42.3333		2018.67
				42.5	2134	2035	1905							42.5		2024.67
				42.6667	2145	2030	1920							42.6667		2031.67
				42.8333	2143	2032	1912							42.8333		2029
				43	2143	2034	1910							43		2029
				43.1667	2147	2033	1912							43.1667		2030.67
				43.3333	2141	2035	1912							43.3333		2029.33
				43.5	2145	2033	1909							43.5		2029
				43.6667	2137	2038	1920							43.6667		2031.67
				43.8333	2143	2031	1922							43.8333		2032
				44	2140	2040	1911							44		2030.33

## Sheet: d-tox
0.25 mg/mL δ-toxin monomers in the absence and presence of seeds of the other PSM peptides
Raw data																	Averaged data
Time (h)	Unseeded	Unseeded	Unseeded	Time (h)	PSMα1 seeds	PSMα1 seeds	PSMα1 seeds	PSMα3 seeds	PSMα3 seeds	PSMα3 seeds	PSMβ1 seeds	PSMβ1 seeds	PSMβ1 seeds	PSMβ2 seeds	PSMβ2 seeds	PSMβ2 seeds	Time (h)	Unseeded	PSMα1 seeds	PSMα3 seeds	PSMβ1 seeds	PSMβ2 seeds
0	122	122	124	0	2073	1582	1887	202	203	211	885	931	932	274	339	535	0	122.667	1847.33	205.333	916	382.667
0.166667	112	118	117	0.166667	1697	1240	1503	188	182	200	832	858	858	251	387	800	0.166667	115.667	1480	190	849.333	479.333
0.333333	105	109	110	0.333333	1545	1140	1395	189	182	202	839	857	874	385	562	996	0.333333	108	1360	191	856.667	647.667
0.5	112	113	114	0.5	1485	1100	1348	203	191	212	873	886	884	709	820	1215	0.5	113	1311	202	881	914.667
0.666667	105	104	112	0.666667	1448	1105	1357	215	201	216	885	897	894	925	1022	1377	0.666667	107	1303.33	210.667	892	1108
0.833333	108	107	115	0.833333	1466	1133	1382	221	210	228	909	923	924	1063	1165	1494	0.833333	110	1327	219.667	918.667	1240.67
1	106	108	107	1	1499	1176	1436	234	217	239	928	951	934	1160	1291	1577	1	107	1370.33	230	937.667	1342.67
1.16667	107	107	115	1.16667	1560	1237	1489	240	228	245	965	971	963	1238	1361	1665	1.16667	109.667	1428.67	237.667	966.333	1421.33
1.33333	107	111	110	1.33333	1613	1304	1567	249	236	252	982	967	980	1302	1435	1725	1.33333	109.333	1494.67	245.667	976.333	1487.33
1.5	108	112	111	1.5	1661	1372	1653	257	240	255	993	999	996	1354	1493	1792	1.5	110.333	1562	250.667	996	1546.33
1.66667	106	105	113	1.66667	1718	1447	1736	265	244	265	1016	1006	997	1399	1539	1831	1.66667	108	1633.67	258	1006.33	1589.67
1.83333	108	104	112	1.83333	1769	1506	1837	265	254	266	1035	1026	997	1434	1577	1880	1.83333	108	1704	261.667	1019.33	1630.33
2	104	108	109	2	1815	1581	1929	272	257	268	1040	1042	1029	1475	1621	1921	2	107	1775	265.667	1037	1672.33
2.16667	108	106	110	2.16667	1865	1649	1992	272	258	275	1060	1052	1017	1504	1640	1948	2.16667	108	1835.33	268.333	1043	1697.33
2.33333	104	106	109	2.33333	1915	1735	2042	267	262	275	1073	1082	1031	1544	1660	1964	2.33333	106.333	1897.33	268	1062	1722.67
2.5	103	108	112	2.5	1963	1792	2094	271	265	279	1083	1084	1026	1551	1689	1991	2.5	107.667	1949.67	271.667	1064.33	1743.67
2.66667	111	106	111	2.66667	2006	1856	2124	271	267	280	1101	1092	1019	1568	1712	2022	2.66667	109.333	1995.33	272.667	1070.67	1767.33
2.83333	106	107	110	2.83333	2042	1918	2160	268	265	281	1103	1107	1025	1592	1732	2046	2.83333	107.667	2040	271.333	1078.33	1790
3	107	107	113	3	2080	1970	2188	274	270	282	1120	1104	1042	1597	1736	2051	3	109	2079.33	275.333	1088.67	1794.67
3.16667	110	109	108	3.16667	2113	2026	2209	272	270	285	1126	1125	1044	1612	1754	2072	3.16667	109	2116	275.667	1098.33	1812.67
3.33333	106	106	111	3.33333	2153	2080	2234	274	269	281	1133	1138	1058	1627	1770	2082	3.33333	107.667	2155.67	274.667	1109.67	1826.33
3.5	108	107	115	3.5	2182	2129	2235	274	271	279	1147	1138	1064	1638	1766	2084	3.5	110	2182	274.667	1116.33	1829.33
3.66667	108	110	112	3.66667	2203	2170	2261	274	272	279	1146	1143	1072	1651	1785	2095	3.66667	110	2211.33	275	1120.33	1843.67
3.83333	110	107	109	3.83333	2226	2204	2284	269	273	276	1157	1156	1065	1667	1795	2117	3.83333	108.667	2238	272.667	1126	1859.67
4	109	107	111	4	2262	2239	2296	272	271	278	1163	1157	1080	1665	1815	2130	4	109	2265.67	273.667	1133.33	1870
4.16667	106	106	113	4.16667	2260	2270	2307	272	271	281	1177	1166	1084	1678	1825	2140	4.16667	108.333	2279	274.667	1142.33	1881
4.33333	108	106	112	4.33333	2288	2304	2323	272	271	282	1194	1176	1088	1695	1823	2152	4.33333	108.667	2305	275	1152.67	1890
4.5	109	107	110	4.5	2306	2329	2337	272	271	277	1196	1173	1098	1701	1835	2159	4.5	108.667	2324	273.333	1155.67	1898.33
4.66667	107	109	112	4.66667	2319	2335	2348	271	271	277	1200	1189	1112	1713	1841	2158	4.66667	109.333	2334	273	1167	1904
4.83333	108	108	110	4.83333	2337	2354	2355	269	267	283	1210	1201	1114	1709	1839	2174	4.83333	108.667	2348.67	273	1175	1907.33
5	105	105	111	5	2356	2368	2362	271	268	281	1206	1196	1125	1714	1852	2173	5	107	2362	273.333	1175.67	1913
5.16667	104	104	111	5.16667	2358	2401	2359	272	273	283	1219	1213	1113	1724	1854	2172	5.16667	106.333	2372.67	276	1181.67	1916.67
5.33333	107	109	110	5.33333	2374	2412	2389	267	269	279	1227	1199	1140	1718	1852	2179	5.33333	108.667	2391.67	271.667	1188.67	1916.33
5.5	109	107	113	5.5	2380	2430	2398	272	269	279	1238	1208	1139	1738	1861	2191	5.5	109.667	2402.67	273.333	1195	1930
5.66667	110	107	110	5.66667	2403	2444	2407	269	267	277	1245	1214	1138	1742	1866	2211	5.66667	109	2418	271	1199	1939.67
5.83333	107	109	110	5.83333	2408	2455	2421	269	271	281	1243	1212	1144	1747	1872	2205	5.83333	108.667	2428	273.667	1199.67	1941.33
6	104	105	110	6	2425	2478	2427	273	270	280	1262	1230	1148	1757	1881	2215	6	106.333	2443.33	274.333	1213.33	1951
6.16667	106	104	108	6.16667	2433	2488	2426	269	267	280	1266	1221	1160	1768	1885	2242	6.16667	106	2449	272	1215.67	1965
6.33333	108	106	110	6.33333	2447	2503	2442	269	270	279	1271	1238	1170	1761	1882	2225	6.33333	108	2464	272.667	1226.33	1956
6.5	105	106	109	6.5	2456	2511	2443	270	269	277	1278	1230	1167	1765	1894	2233	6.5	106.667	2470	272	1225	1964
6.66667	106	104	114	6.66667	2461	2533	2450	269	271	277	1275	1237	1176	1774	1900	2244	6.66667	108	2481.33	272.333	1229.33	1972.67
6.83333	107	108	113	6.83333	2478	2532	2465	276	272	278	1276	1258	1194	1777	1877	2258	6.83333	109.333	2491.67	275.333	1242.67	1970.67
7	108	110	113	7	2479	2544	2487	266	265	277	1266	1254	1171	1782	1896	2255	7	110.333	2503.33	269.333	1230.33	1977.67
7.16667	105	105	113	7.16667	2499	2564	2476	270	271	278	1286	1264	1175	1788	1902	2258	7.16667	107.667	2513	273	1241.67	1982.67
7.33333	105	107	110	7.33333	2499	2571	2485	267	269	278	1289	1260	1191	1790	1895	2276	7.33333	107.333	2518.33	271.333	1246.67	1987
7.5	107	111	111	7.5	2518	2587	2504	270	267	277	1306	1272	1193	1791	1902	2277	7.5	109.667	2536.33	271.333	1257	1990
7.66667	107	105	113	7.66667	2520	2595	2512	269	264	278	1294	1264	1196	1803	1904	2272	7.66667	108.333	2542.33	270.333	1251.33	1993
7.83333	107	106	109	7.83333	2541	2590	2519	271	265	277	1308	1267	1200	1801	1911	2284	7.83333	107.333	2550	271	1258.33	1998.67
8	104	107	115	8	2545	2610	2524	267	268	275	1311	1278	1208	1810	1923	2295	8	108.667	2559.67	270	1265.67	2009.33
8.16667	104	108	110	8.16667	2563	2633	2541	269	270	277	1323	1292	1202	1813	1919	2305	8.16667	107.333	2579	272	1272.33	2012.33
8.33333	108	104	109	8.33333	2559	2635	2542	269	265	277	1336	1287	1214	1816	1920	2292	8.33333	107	2578.67	270.333	1279	2009.33
8.5	106	105	110	8.5	2571	2632	2544	267	264	277	1326	1292	1220	1814	1926	2295	8.5	107	2582.33	269.333	1279.33	2011.67
8.66667	104	108	111	8.66667	2578	2642	2562	272	264	277	1336	1290	1221	1821	1918	2308	8.66667	107.667	2594	271	1282.33	2015.67
8.83333	104	109	110	8.83333	2586	2649	2561	268	266	273	1338	1296	1247	1825	1926	2311	8.83333	107.667	2598.67	269	1293.67	2020.67
9	104	105	109	9	2599	2654	2570	263	263	276	1340	1306	1241	1830	1938	2323	9	106	2607.67	267.333	1295.67	2030.33
9.16667	109	105	111	9.16667	2595	2673	2584	269	270	273	1348	1304	1250	1828	1936	2325	9.16667	108.333	2617.33	270.667	1300.67	2029.67
9.33333	107	106	111	9.33333	2611	2676	2589	264	264	280	1346	1307	1235	1831	1948	2337	9.33333	108	2625.33	269.333	1296	2038.67
9.5	109	107	112	9.5	2615	2697	2587	267	267	277	1361	1321	1236	1828	1944	2340	9.5	109.333	2633	270.333	1306	2037.33
9.66667	103	107	107	9.66667	2607	2700	2612	268	267	274	1359	1314	1246	1834	1936	2333	9.66667	105.667	2639.67	269.667	1306.33	2034.33
9.83333	107	106	110	9.83333	2626	2690	2598	268	266	276	1364	1325	1250	1835	1948	2340	9.83333	107.667	2638	270	1313	2041
10	103	108	109	10	2630	2723	2603	270	263	277	1360	1330	1254	1835	1946	2350	10	106.667	2652	270	1314.67	2043.67
10.1667	104	105	109	10.1667	2645	2706	2628	267	258	272	1374	1336	1260	1841	1936	2345	10.1667	106	2659.67	265.667	1323.33	2040.67
10.3333	103	108	111	10.3333	2633	2702	2621	266	269	274	1369	1333	1253	1833	1953	2353	10.3333	107.333	2652	269.667	1318.33	2046.33
10.5	106	108	115	10.5	2644	2726	2629	262	266	276	1372	1329	1267	1852	1962	2359	10.5	109.667	2666.33	268	1322.67	2057.67
10.6667	103	109	111	10.6667	2661	2738	2638	261	265	272	1380	1340	1275	1859	1955	2364	10.6667	107.667	2679	266	1331.67	2059.33
10.8333	108	103	111	10.8333	2660	2735	2635	266	267	273	1388	1343	1274	1850	1956	2359	10.8333	107.333	2676.67	268.667	1335	2055
11	105	105	115	11	2672	2738	2644	266	265	272	1383	1341	1278	1850	1964	2373	11	108.333	2684.67	267.667	1334	2062.33
11.1667	104	106	110	11.1667	2672	2736	2667	264	263	273	1386	1343	1278	1866	1966	2373	11.1667	106.667	2691.67	266.667	1335.67	2068.33
11.3333	100	108	109	11.3333	2689	2754	2660	267	263	277	1387	1363	1278	1860	1974	2371	11.3333	105.667	2701	269	1342.67	2068.33
11.5	104	107	110	11.5	2675	2752	2669	262	261	272	1398	1346	1284	1869	1974	2374	11.5	107	2698.67	265	1342.67	2072.33
11.6667	103	105	111	11.6667	2678	2768	2677	260	263	270	1403	1349	1291	1875	1968	2379	11.6667	106.333	2707.67	264.333	1347.67	2074
11.8333	105	107	111	11.8333	2702	2767	2675	265	262	272	1397	1362	1281	1872	1967	2399	11.8333	107.667	2714.67	266.333	1346.67	2079.33
12	106	106	112	12	2691	2784	2676	263	263	277	1393	1365	1282	1877	1975	2389	12	108	2717	267.667	1346.67	2080.33
12.1667	105	107	113	12.1667	2704	2785	2685	265	265	271	1419	1369	1290	1875	1985	2398	12.1667	108.333	2724.67	267	1359.33	2086
12.3333	105	105	110	12.3333	2713	2786	2682	264	262	274	1411	1370	1295	1881	1982	2408	12.3333	106.667	2727	266.667	1358.67	2090.33
12.5	104	105	112	12.5	2714	2805	2701	262	261	270	1424	1388	1302	1878	1974	2414	12.5	107	2740	264.333	1371.33	2088.67
12.6667	106	107	111	12.6667	2714	2800	2688	265	262	271	1426	1392	1315	1880	1977	2427	12.6667	108	2734	266	1377.67	2094.67
12.8333	104	106	111	12.8333	2720	2803	2707	263	260	269	1429	1382	1312	1885	1981	2413	12.8333	107	2743.33	264	1374.33	2093
13	105	104	110	13	2730	2800	2714	262	261	266	1436	1393	1313	1896	1987	2416	13	106.333	2748	263	1380.67	2099.67
13.1667	104	104	110	13.1667	2748	2797	2714	263	259	267	1426	1383	1307	1890	1987	2420	13.1667	106	2753	263	1372	2099
13.3333	107	107	111	13.3333	2738	2814	2721	258	262	274	1448	1396	1311	1887	1994	2433	13.3333	108.333	2757.67	264.667	1385	2104.67
13.5	106	104	111	13.5	2755	2814	2734	258	260	268	1438	1397	1328	1890	2008	2433	13.5	107	2767.67	262	1387.67	2110.33
13.6667	108	106	109	13.6667	2741	2808	2726	259	259	266	1438	1413	1322	1885	1989	2419	13.6667	107.667	2758.33	261.333	1391	2097.67
13.8333	102	108	113	13.8333	2754	2838	2723	261	258	269	1452	1400	1332	1897	1992	2445	13.8333	107.667	2771.67	262.667	1394.67	2111.33
14	103	107	108	14	2749	2828	2736	261	265	269	1451	1404	1332	1902	2005	2446	14	106	2771	265	1395.67	2117.67
14.1667	107	106	109	14.1667	2766	2840	2739	260	261	269	1461	1405	1334	1893	1998	2447	14.1667	107.333	2781.67	263.333	1400	2112.67
14.3333	104	108	112	14.3333	2759	2831	2747	261	261	269	1459	1410	1341	1907	2012	2437	14.3333	108	2779	263.667	1403.33	2118.67
14.5	104	107	111	14.5	2776	2845	2738	263	259	271	1462	1412	1342	1899	2004	2452	14.5	107.333	2786.33	264.333	1405.33	2118.33
14.6667	108	103	110	14.6667	2785	2837	2748	262	260	271	1476	1416	1337	1904	2009	2464	14.6667	107	2790	264.333	1409.67	2125.67
14.8333	106	107	112	14.8333	2782	2845	2758	264	259	269	1468	1407	1346	1908	2012	2477	14.8333	108.333	2795	264	1407	2132.33
15	102	108	110	15	2777	2851	2752	262	260	265	1469	1430	1341	1914	1999	2457	15	106.667	2793.33	262.333	1413.33	2123.33
15.1667	105	107	113	15.1667	2776	2843	2759	256	255	268	1481	1415	1344	1910	2015	2464	15.1667	108.333	2792.67	259.667	1413.33	2129.67
15.3333	109	105	109	15.3333	2782	2843	2758	258	258	271	1463	1429	1353	1908	2017	2465	15.3333	107.667	2794.33	262.333	1415	2130
15.5	106	107	112	15.5	2798	2848	2771	261	258	265	1478	1426	1350	1907	2023	2468	15.5	108.333	2805.67	261.333	1418	2132.67
15.6667	106	107	110	15.6667	2810	2851	2778	258	253	265	1479	1431	1348	1923	2022	2472	15.6667	107.667	2813	258.667	1419.33	2139
15.8333	108	108	111	15.8333	2811	2862	2776	256	259	267	1487	1429	1356	1924	2030	2474	15.8333	109	2816.33	260.667	1424	2142.67
16	105	107	111	16	2803	2858	2773	259	261	267	1495	1428	1348	1914	2026	2479	16	107.667	2811.33	262.333	1423.67	2139.67
16.1667	104	104	114	16.1667	2798	2862	2784	256	252	266	1502	1422	1362	1923	2021	2485	16.1667	107.333	2814.67	258	1428.67	2143
16.3333	107	104	110	16.3333	2812	2864	2777	257	259	267	1492	1449	1357	1929	2025	2489	16.3333	107	2817.67	261	1432.67	2147.67
16.5	106	109	113	16.5	2800	2873	2773	257	255	265	1492	1443	1366	1919	2039	2499	16.5	109.333	2815.33	259	1433.67	2152.33
16.6667	106	109	112	16.6667	2824	2864	2794	260	258	269	1494	1455	1362	1925	2039	2500	16.6667	109	2827.33	262.333	1437	2154.67
16.8333	107	106	112	16.8333	2819	2873	2794	256	258	268	1500	1454	1366	1936	2037	2490	16.8333	108.333	2828.67	260.667	1440	2154.33
17	107	106	112	17	2810	2883	2790	255	261	270	1507	1468	1366	1923	2028	2494	17	108.333	2827.67	262	1447	2148.33
17.1667	106	106	111	17.1667	2820	2876	2803	258	257	264	1503	1452	1375	1932	2035	2496	17.1667	107.667	2833	259.667	1443.33	2154.33
17.3333	107	106	112	17.3333	2832	2875	2801	261	255	268	1508	1459	1369	1935	2038	2501	17.3333	108.333	2836	261.333	1445.33	2158
17.5	105	107	112	17.5	2835	2887	2803	260	255	265	1507	1457	1365	1931	2042	2510	17.5	108	2841.67	260	1443	2161
17.6667	105	104	112	17.6667	2842	2878	2801	262	254	267	1514	1451	1377	1940	2039	2514	17.6667	107	2840.33	261	1447.33	2164.33
17.8333	107	107	111	17.8333	2838	2891	2797	260	255	267	1513	1471	1383	1939	2045	2531	17.8333	108.333	2842	260.667	1455.67	2171.67
18	105	107	115	18	2836	2891	2802	261	252	267	1514	1467	1384	1932	2037	2522	18	109	2843	260	1455	2163.67
18.1667	110	108	112	18.1667	2849	2898	2803	259	254	263	1523	1459	1388	1948	2040	2536	18.1667	110	2850	258.667	1456.67	2174.67
18.3333	102	104	109	18.3333	2846	2890	2807	255	254	266	1511	1454	1385	1940	2061	2522	18.3333	105	2847.67	258.333	1450	2174.33
18.5	106	105	110	18.5	2843	2900	2811	258	257	266	1507	1472	1381	1950	2058	2529	18.5	107	2851.33	260.333	1453.33	2179
18.6667	107	106	113	18.6667	2861	2881	2819	256	255	261	1529	1476	1383	1949	2058	2535	18.6667	108.667	2853.67	257.333	1462.67	2180.67
18.8333	108	107	114	18.8333	2852	2890	2827	254	254	263	1525	1481	1386	1954	2057	2520	18.8333	109.667	2856.33	257	1464	2177
19	105	106	109	19	2859	2903	2818	256	256	266	1535	1480	1403	1952	2059	2538	19	106.667	2860	259.333	1472.67	2183
19.1667	107	109	111	19.1667	2865	2906	2828	255	257	262	1533	1483	1393	1951	2061	2538	19.1667	109	2866.33	258	1469.67	2183.33
19.3333	107	107	115	19.3333	2860	2909	2840	254	254	265	1531	1468	1399	1951	2059	2532	19.3333	109.667	2869.67	257.667	1466	2180.67
19.5	105	104	115	19.5	2869	2913	2824	253	257	265	1533	1474	1400	1959	2070	2545	19.5	108	2868.67	258.333	1469	2191.33
19.6667	105	106	112	19.6667	2864	2906	2835	255	255	263	1551	1492	1395	1959	2081	2542	19.6667	107.667	2868.33	257.667	1479.33	2194
19.8333	105	108	114	19.8333	2857	2923	2822	256	254	263	1547	1482	1391	1964	2068	2553	19.8333	109	2867.33	257.667	1473.33	2195
20	104	108	112	20	2876	2920	2834	251	257	263	1527	1492	1416	1955	2064	2563	20	108	2876.67	257	1478.33	2194
20.1667	107	104	113	20.1667	2876	2925	2837	258	252	267	1543	1502	1412	1967	2067	2553	20.1667	108	2879.33	259	1485.67	2195.67
20.3333	109	107	114	20.3333	2873	2923	2836	254	248	261	1549	1492	1395	1966	2064	2563	20.3333	110	2877.33	254.333	1478.67	2197.67
20.5	105	108	113	20.5	2876	2918	2850	256	254	262	1545	1493	1408	1969	2069	2572	20.5	108.667	2881.33	257.333	1482	2203.33
20.6667	106	110	113	20.6667	2871	2939	2849	254	250	265	1542	1499	1423	1964	2062	2566	20.6667	109.667	2886.33	256.333	1488	2197.33
20.8333	108	107	109	20.8333	2876	2930	2856	252	258	262	1545	1491	1420	1963	2077	2570	20.8333	108	2887.33	257.333	1485.33	2203.33
21	106	110	113	21	2872	2929	2844	255	253	266	1556	1502	1411	1960	2060	2564	21	109.667	2881.67	258	1489.67	2194.67
21.1667	107	108	113	21.1667	2883	2930	2841	260	248	259	1563	1497	1416	1956	2070	2577	21.1667	109.333	2884.67	255.667	1492	2201
21.3333	107	104	110	21.3333	2879	2918	2853	247	252	260	1565	1511	1425	1979	2074	2572	21.3333	107	2883.33	253	1500.33	2208.33
21.5	109	109	112	21.5	2889	2928	2861	252	249	264	1546	1507	1427	1974	2064	2579	21.5	110	2892.67	255	1493.33	2205.67
21.6667	108	107	110	21.6667	2886	2939	2860	253	254	267	1554	1513	1423	1974	2075	2568	21.6667	108.333	2895	258	1496.67	2205.67
21.8333	106	108	112	21.8333	2887	2949	2856	252	250	264	1560	1511	1433	1971	2081	2575	21.8333	108.667	2897.33	255.333	1501.33	2209
22	106	105	113	22	2894	2936	2860	253	251	259	1555	1501	1427	1972	2074	2580	22	108	2896.67	254.333	1494.33	2208.67
22.1667	107	105	114	22.1667	2900	2938	2874	250	254	260	1585	1497	1416	1976	2089	2592	22.1667	108.667	2904	254.667	1499.33	2219
22.3333	107	108	111	22.3333	2903	2954	2874	255	252	257	1581	1501	1430	1978	2081	2578	22.3333	108.667	2910.33	254.667	1504	2212.33
22.5	108	110	112	22.5	2891	2938	2871	251	254	265	1568	1519	1433	1983	2087	2581	22.5	110	2900	256.667	1506.67	2217
22.6667	106	107	112	22.6667	2896	2953	2868	254	250	265	1558	1512	1410	1984	2091	2601	22.6667	108.333	2905.67	256.333	1493.33	2225.33
22.8333	108	110	114	22.8333	2896	2946	2880	255	253	258	1567	1521	1431	1987	2092	2591	22.8333	110.667	2907.33	255.333	1506.33	2223.33
23	107	104	112	23	2908	2941	2870	250	250	258	1569	1527	1428	1989	2082	2602	23	107.667	2906.33	252.667	1508	2224.33
23.1667	105	109	111	23.1667	2895	2951	2877	253	248	257	1580	1529	1425	1983	2088	2604	23.1667	108.333	2907.67	252.667	1511.33	2225
23.3333	105	107	111	23.3333	2899	2948	2876	252	254	260	1579	1538	1436	1988	2083	2608	23.3333	107.667	2907.67	255.333	1517.67	2226.33
23.5	105	103	109	23.5	2897	2950	2874	250	252	263	1581	1523	1434	1974	2094	2607	23.5	105.667	2907	255	1512.67	2225
23.6667	106	109	110	23.6667	2909	2950	2891	248	247	259	1581	1536	1436	1982	2096	2599	23.6667	108.333	2916.67	251.333	1517.67	2225.67
23.8333	106	108	113	23.8333	2902	2960	2879	253	253	257	1590	1530	1428	1987	2097	2606	23.8333	109	2913.67	254.333	1516	2230
24	104	106	113	24	2916	2958	2885	256	244	261	1587	1536	1442	1989	2085	2607	24	107.667	2919.67	253.667	1521.67	2227
24.1667	104	108	113	24.1667	2913	2970	2888	253	252	261	1574	1539	1449	1992	2095	2610	24.1667	108.333	2923.67	255.333	1520.67	2232.33
24.3333	108	110	111	24.3333	2923	2967	2898	248	248	260	1588	1533	1464	2006	2095	2613	24.3333	109.667	2929.33	252	1528.33	2238
24.5	106	108	111	24.5	2918	2959	2891	249	246	265	1586	1539	1436	1995	2111	2624	24.5	108.333	2922.67	253.333	1520.33	2243.33
24.6667	108	107	115	24.6667	2906	2971	2892	254	249	258	1575	1547	1451	1997	2104	2634	24.6667	110	2923	253.667	1524.33	2245
24.8333	105	107	109	24.8333	2904	2964	2899	254	249	261	1579	1540	1452	1994	2104	2626	24.8333	107	2922.33	254.667	1523.67	2241.33
25	107	106	113	25	2910	2974	2900	251	251	260	1590	1545	1448	1995	2099	2630	25	108.667	2928	254	1527.67	2241.33
25.1667	109	108	113	25.1667	2913	2955	2903	251	247	261	1602	1544	1458	1994	2102	2635	25.1667	110	2923.67	253	1534.67	2243.67
25.3333	107	107	114	25.3333	2925	2971	2902	254	250	259	1589	1554	1460	2005	2104	2633	25.3333	109.333	2932.67	254.333	1534.33	2247.33
25.5	107	106	111	25.5	2924	2959	2892	251	248	256	1603	1548	1448	1997	2109	2635	25.5	108	2925	251.667	1533	2247
25.6667	107	108	111	25.6667	2911	2971	2910	250	251	262	1587	1546	1470	2004	2104	2640	25.6667	108.667	2930.67	254.333	1534.33	2249.33
25.8333	105	105	115	25.8333	2922	2971	2917	249	246	259	1613	1561	1458	2005	2114	2643	25.8333	108.333	2936.67	251.333	1544	2254
26	104	106	115	26	2920	2981	2909	253	253	259	1598	1565	1462	2000	2117	2645	26	108.333	2936.67	255	1541.67	2254
26.1667	104	107	113	26.1667	2918	2978	2910	251	246	262	1607	1548	1465	1993	2117	2654	26.1667	108	2935.33	253	1540	2254.67
26.3333	107	106	113	26.3333	2922	2984	2915	252	249	259	1591	1554	1462	2008	2106	2633	26.3333	108.667	2940.33	253.333	1535.67	2249
26.5	104	106	113	26.5	2926	2979	2913	253	246	259	1623	1557	1460	2004	2117	2649	26.5	107.667	2939.33	252.667	1546.67	2256.67
26.6667	104	109	115	26.6667	2918	2976	2914	248	245	258	1616	1558	1466	2010	2117	2660	26.6667	109.333	2936	250.333	1546.67	2262.33
26.8333	107	109	114	26.8333	2924	2974	2918	253	251	253	1601	1546	1470	2014	2123	2642	26.8333	110	2938.67	252.333	1539	2259.67
27	107	107	113	27	2927	2988	2916	251	246	257	1608	1564	1476	2011	2119	2658	27	109	2943.67	251.333	1549.33	2262.67
27.1667	106	108	111	27.1667	2928	2975	2922	248	244	253	1612	1556	1476	2000	2125	2654	27.1667	108.333	2941.67	248.333	1548	2259.67
27.3333	105	107	115	27.3333	2922	2996	2921	252	248	253	1614	1557	1478	1997	2123	2662	27.3333	109	2946.33	251	1549.67	2260.67
27.5	107	110	111	27.5	2931	2990	2929	248	247	257	1623	1561	1484	2017	2118	2663	27.5	109.333	2950	250.667	1556	2266
27.6667	107	108	113	27.6667	2934	3002	2920	249	250	257	1609	1567	1476	2016	2130	2670	27.6667	109.333	2952	252	1550.67	2272
27.8333	103	109	112	27.8333	2928	2985	2937	249	247	256	1614	1573	1482	2012	2129	2663	27.8333	108	2950	250.667	1556.33	2268
28	106	109	115	28	2941	2991	2932	248	247	259	1607	1559	1470	2022	2124	2674	28	110	2954.67	251.333	1545.33	2273.33
28.1667	105	108	112	28.1667	2936	2997	2928	247	246	258	1622	1569	1484	2009	2126	2676	28.1667	108.333	2953.67	250.333	1558.33	2270.33
28.3333	108	110	111	28.3333	2939	2991	2936	249	245	257	1613	1567	1475	2009	2127	2680	28.3333	109.667	2955.33	250.333	1551.67	2272
28.5	108	108	113	28.5	2932	2988	2936	245	245	257	1629	1573	1481	2011	2126	2665	28.5	109.667	2952	249	1561	2267.33
28.6667	104	105	112	28.6667	2929	2981	2942	246	242	256	1629	1577	1475	2017	2137	2685	28.6667	107	2950.67	248	1560.33	2279.67
28.8333	106	108	110	28.8333	2929	3001	2938	247	250	254	1620	1573	1481	2021	2127	2694	28.8333	108	2956	250.333	1558	2280.67
29	105	108	110	29	2941	3008	2938	249	246	255	1635	1577	1476	2024	2132	2684	29	107.667	2962.33	250	1562.67	2280
29.1667	107	107	111	29.1667	2939	2992	2940	250	248	252	1633	1579	1501				29.1667	108.333	2957	250	1571
29.3333	106	107	114	29.3333	2938	2998	2932	248	245	255	1622	1586	1487				29.3333	109	2956	249.333	1565
29.5	107	110	110	29.5	2932	2992	2949	250	242	255	1627	1589	1489				29.5	109	2957.67	249	1568.33
29.6667	106	105	113	29.6667	2918	3005	2952	248	248	259	1626	1585	1482				29.6667	108	2958.33	251.667	1564.33
29.8333	103	108	115	29.8333	2939	3014	2948	244	244	252	1631	1569	1487				29.8333	108.667	2967	246.667	1562.33
30	105	108	113	30	2933	2998	2958	245	246	256	1639	1583	1493				30	108.667	2963	249	1571.67
30.1667	107	107	111	30.1667	2940	3005	2942	244	246	256	1644	1585	1494				30.1667	108.333	2962.33	248.667	1574.33
30.3333	107	106	112	30.3333	2939	3004	2953	248	245	257	1631	1575	1501				30.3333	108.333	2965.33	250	1569
30.5	106	109	111	30.5	2954	3009	2954	243	244	254	1634	1583	1494				30.5	108.667	2972.33	247	1570.33
30.6667	104	106	109	30.6667	2942	3000	2962	250	243	256	1619	1591	1510				30.6667	106.333	2968	249.667	1573.33
30.8333	108	103	112	30.8333	2948	3013	2945	245	245	259	1640	1578	1502				30.8333	107.667	2968.67	249.667	1573.33
31	106	108	112	31	2941	3012	2962	246	243	257	1642	1583	1494				31	108.667	2971.67	248.667	1573
31.1667	105	106	114	31.1667	2938	3005	2959	250	246	250	1636	1575	1498				31.1667	108.333	2967.33	248.667	1569.67
31.3333	109	105	112	31.3333	2936	3015	2952	246	245	254	1632	1583	1499				31.3333	108.667	2967.67	248.333	1571.33
31.5	105	106	110	31.5	2943	3013	2960	246	247	253	1635	1593	1505				31.5	107	2972	248.667	1577.67
31.6667	106	104	113	31.6667	2940	3016	2966	246	243	253	1646	1597	1502				31.6667	107.667	2974	247.333	1581.67
31.8333	105	108	113	31.8333	2958	3021	2973	243	244	250	1657	1599	1505				31.8333	108.667	2984	245.667	1587
32	107	105	108	32	2958	3021	2970	245	243	253	1647	1589	1517				32	106.667	2983	247	1584.33
32.1667	103	106	113	32.1667	2951	3015	2975	244	245	254							32.1667	107.333	2980.33	247.667
32.3333	106	108	110	32.3333	2949	3022	2973										32.3333	108	2981.33
32.5	106	105	109	32.5	2948	3015	2976										32.5	106.667	2979.67
32.6667	106	109	113	32.6667	2959	3014	2980										32.6667	109.333	2984.33
32.8333	106	107	114	32.8333	2948	3035	2977										32.8333	109	2986.67
33	108	105	113	33	2967	3022	2989										33	108.667	2992.67
33.1667	107	109	114	33.1667	2969	3026	2982										33.1667	110	2992.33
33.3333	107	109	111	33.3333	2941	3016	2992										33.3333	109	2983
33.5	102	109	112	33.5	2961	3017	2987										33.5	107.667	2988.33
33.6667	106	108	110	33.6667	2966	3036	2991										33.6667	108	2997.67
33.8333	107	106	110	33.8333	2961	3043	2990										33.8333	107.667	2998
34	104	106	109	34	2966	3032	2988										34	106.333	2995.33
34.1667	106	107	114	34.1667	2958	3022	3001										34.1667	109	2993.67
34.3333	106	107	110	34.3333	2954	3030	3005										34.3333	107.667	2996.33
34.5	108	108	108	34.5	2964	3032	3011										34.5	108	3002.33
34.6667	106	108	109	34.6667	2957	3029	3007										34.6667	107.667	2997.67
34.8333	108	110	116	34.8333	2958	3025	2993										34.8333	111.333	2992
35	106	106	112	35	2960	3023	3012										35	108	2998.33
35.1667	107	107	116	35.1667	2953	3039	2990										35.1667	110	2994
35.3333	106	109	113	35.3333	2965	3027	3008										35.3333	109.333	3000
35.5	103	107	111	35.5	2968	3043	3002										35.5	107	3004.33
35.6667	105	104	114	35.6667	2960	3031	3004										35.6667	107.667	2998.33
35.8333	104	106	110	35.8333	2962	3030	3011										35.8333	106.667	3001
36	106	108	114	36	2963	3037	3012										36	109.333	3004
36.1667	104	106	115	36.1667	2962	3042	3014										36.1667	108.333	3006
36.3333	103	107	111	36.3333	2971	3041	3007										36.3333	107	3006.33
36.5	105	109	113	36.5	2980	3043	3019										36.5	109	3014
36.6667	107	110	111	36.6667	2965	3040	3007										36.6667	109.333	3004
36.8333	107	108	112	36.8333	2968	3045	3031										36.8333	109	3014.67
37	106	107	113	37	2952	3030	3019										37	108.667	3000.33
37.1667	110	108	115	37.1667	2964	3042	3020										37.1667	111	3008.67
37.3333	106	108	113	37.3333	2975	3039	3018										37.3333	109	3010.67
37.5	107	109	112	37.5	2974	3047	3015										37.5	109.333	3012
37.6667	107	108	112	37.6667	2971	3045	3019										37.6667	109	3011.67
37.8333	103	109	113	37.8333	2972	3053	3020										37.8333	108.333	3015
38	106	108	111	38	2982	3048	3032										38	108.333	3020.67
38.1667	106	108	112	38.1667	2969	3040	3028										38.1667	108.667	3012.33
38.3333	103	106	113	38.3333	2966	3049	3031										38.3333	107.333	3015.33
38.5	104	108	112	38.5	2968	3046	3026										38.5	108	3013.33
38.6667	104	110	113	38.6667	2934	3036	3008										38.6667	109	2992.67
38.8333	104	107	112	38.8333	2945	3025	3008										38.8333	107.667	2992.67
39	105	108	112	39	2940	3033	3011										39	108.333	2994.67
39.1667	107	108	115	39.1667	2939	3019	3013										39.1667	110	2990.33
39.3333	107	107	113	39.3333	2950	3024	3003										39.3333	109	2992.33
39.5	107	108	110	39.5	2941	3035	3019										39.5	108.333	2998.33
39.6667	106	106	113	39.6667	2947	3027	3014										39.6667	108.333	2996
39.8333	105	106	112	39.8333	2942	3023	3020										39.8333	107.667	2995
40	107	106	111	40	2950	3041	3021										40	108	3004
40.1667	102	105	109	40.1667	2941	3032	3028										40.1667	105.333	3000.33
40.3333	101	108	113	40.3333	2953	3024	3019										40.3333	107.333	2998.67
40.5	109	106	111	40.5	2951	3035	3024										40.5	108.667	3003.33
40.6667	105	107	113	40.6667	2941	3036	3025										40.6667	108.333	3000.67
40.8333	106	105	113	40.8333	2949	3043	3037										40.8333	108	3009.67
41	110	111	112	41	2957	3036	3036										41	111	3009.67
41.1667	103	107	113	41.1667	2955	3041	3046										41.1667	107.667	3014
41.3333	107	110	117	41.3333	2947	3047	3036										41.3333	111.333	3010
41.5	106	107	113	41.5	2953	3042	3027										41.5	108.667	3007.33
41.6667	107	107	115	41.6667	2953	3041	3048										41.6667	109.667	3014
41.8333	105	106	112	41.8333	2950	3043	3031										41.8333	107.667	3008
42	109	107	113	42	2943	3039	3040										42	109.667	3007.33
42.1667	106	105	113	42.1667	2938	3056	3034										42.1667	108	3009.33
42.3333	105	107	113	42.3333	2954	3036	3037										42.3333	108.333	3009
42.5	106	108	111	42.5	2951	3037	3038										42.5	108.333	3008.67
42.6667	106	107	112	42.6667	2953	3046	3036										42.6667	108.333	3011.67
42.8333	107	107	109	42.8333	2944	3052	3042										42.8333	107.667	3012.67
43	106	109	111	43	2952	3047	3045										43	108.667	3014.67
43.1667	107	107	112	43.1667	2945	3033	3042										43.1667	108.667	3006.67
43.3333	105	109	112	43.3333	2951	3041	3059										43.3333	108.667	3017
43.5	103	109	110	43.5	2942	3046	3046										43.5	107.333	3011.33
43.6667	101	105	109	43.6667	2948	3049	3046										43.6667	105	3014.33
43.8333	106	109	113	43.8333	2946	3053	3063										43.8333	109.333	3020.67
44	106	106	113	44	2951	3054	3059										44	108.333	3021.33
44.1667	107	108	112														44.1667	109
44.3333	107	108	115														44.3333	110
44.5	107	107	112														44.5	108.667
44.6667	107	110	114														44.6667	110.333
44.8333	108	106	112														44.8333	108.667
45	108	108	114														45	110
45.1667	106	108	112														45.1667	108.667
45.3333	106	106	111														45.3333	107.667
45.5	106	108	114														45.5	109.333
45.6667	105	105	114														45.6667	108
45.8333	106	107	113														45.8333	108.667
46	104	106	113														46	107.667
46.1667	105	110	113														46.1667	109.333
46.3333	106	107	110														46.3333	107.667
46.5	106	107	113														46.5	108.667
46.6667	107	107	115														46.6667	109.667
46.8333	104	107	112														46.8333	107.667
47	104	105	113														47	107.333
47.1667	105	108	113														47.1667	108.667
47.3333	106	110	114														47.3333	110
47.5	108	109	114														47.5	110.333
47.6667	104	110	111														47.6667	108.333
47.8333	105	110	113														47.8333	109.333
48	106	108	113														48	109
48.1667	106	110	112														48.1667	109.333
48.3333	104	108	115														48.3333	109
48.5	107	110	114														48.5	110.333
48.6667	102	111	113														48.6667	108.667
48.8333	108	111	114														48.8333	111
49	105	106	113														49	108
49.1667	106	109	112														49.1667	109
49.3333	105	108	114														49.3333	109
49.5	104	108	110														49.5	107.333
49.6667	108	106	111														49.6667	108.333
49.8333	105	106	113														49.8333	108
50	108	107	111														50	108.667
50.1667	102	107	110														50.1667	106.333
50.3333	105	110	112														50.3333	109
50.5	106	109	112														50.5	109
50.6667	106	107	114														50.6667	109
50.8333	106	106	112														50.8333	108
51	108	106	114														51	109.333
51.1667	106	107	112														51.1667	108.333
51.3333	105	110	113														51.3333	109.333
51.5	106	106	111														51.5	107.667
51.6667	106	108	116														51.6667	110
51.8333	109	107	112														51.8333	109.333
52	108	109	113														52	110
52.1667	108	108	114														52.1667	110
52.3333	104	107	115														52.3333	108.667
52.5	107	108	113														52.5	109.333
52.6667	103	108	114														52.6667	108.333
52.8333	104	106	110														52.8333	106.667
53	106	110	112														53	109.333
53.1667	107	106	110														53.1667	107.667
53.3333	107	108	113														53.3333	109.333
53.5	104	106	112														53.5	107.333
53.6667	107	109	117														53.6667	111
53.8333	105	105	112														53.8333	107.333
54	107	105	111														54	107.667
54.1667	107	107	112														54.1667	108.667
54.3333	107	111	113														54.3333	110.333
54.5	108	107	110														54.5	108.333
54.6667	107	109	112														54.6667	109.333
54.8333	106	108	112														54.8333	108.667
55	106	103	113														55	107.333
55.1667	107	107	114														55.1667	109.333
55.3333	104	106	110														55.3333	106.667
55.5	106	109	114														55.5	109.667
55.6667	109	110	113														55.6667	110.667
55.8333	109	110	110														55.8333	109.667
56	106	107	111														56	108
56.1667	105	108	114														56.1667	109
56.3333	106	108	113														56.3333	109
56.5	108	109	112														56.5	109.667
56.6667	107	106	113														56.6667	108.667
56.8333	108	110	115														56.8333	111
57	108	104	115														57	109
57.1667	109	108	115														57.1667	110.667
57.3333	106	108	113														57.3333	109
57.5	106	110	114														57.5	110
57.6667	107	110	113														57.6667	110
57.8333	106	108	111														57.8333	108.333
58	109	108	114														58	110.333
58.1667	106	109	114														58.1667	109.667
58.3333	104	105	112														58.3333	107
58.5	105	109	115														58.5	109.667
58.6667	107	109	116														58.6667	110.667
58.8333	109	107	115														58.8333	110.333
59	107	110	112														59	109.667
59.1667	106	109	113														59.1667	109.333
59.3333	102	109	115														59.3333	108.667
59.5	110	107	114														59.5	110.333
59.6667	107	104	114														59.6667	108.333
59.8333	106	110	113														59.8333	109.667
60	109	106	114														60	109.667
60.1667	102	105	113														60.1667	106.667
60.3333	107	110	117														60.3333	111.333
60.5	109	107	116														60.5	110.667
60.6667	106	110	117														60.6667	111
60.8333	106	108	112														60.8333	108.667
61	106	107	112														61	108.333
61.1667	109	111	111														61.1667	110.333
61.3333	104	110	110														61.3333	108
61.5	105	107	113														61.5	108.333
61.6667	103	113	111														61.6667	109
61.8333	106	111	110														61.8333	109
62	106	107	112														62	108.333
62.1667	108	109	114														62.1667	110.333
62.3333	105	109	113														62.3333	109
62.5	107	110	113														62.5	110
62.6667	107	107	116														62.6667	110
62.8333	109	105	109														62.8333	107.667
63	108	111	116														63	111.667
63.1667	109	110	117														63.1667	112
63.3333	106	106	113														63.3333	108.333
63.5	105	108	112														63.5	108.333
63.6667	105	106	114														63.6667	108.333
63.8333	110	108	113														63.8333	110.333
64	106	107	111														64	108
64.1667	107	107	112														64.1667	108.667
64.3333	107	103	114														64.3333	108
64.5	104	110	119														64.5	111
64.6667	104	107	113														64.6667	108
64.8333	107	104	112														64.8333	107.667
65	107	105	112														65	108
65.1667	112	108	111														65.1667	110.333
65.3333	105	109	115														65.3333	109.667
65.5	110	112	115														65.5	112.333
65.6667	104	108	112														65.6667	108
65.8333	105	106	112														65.8333	107.667
66	109	107	111														66	109
66.1667	108	106	110														66.1667	108
66.3333	106	106	114														66.3333	108.667
66.5	103	107	107														66.5	105.667
66.6667	108	112	115														66.6667	111.667
66.8333	106	111	111														66.8333	109.333
67	108	106	113														67	109
67.1667	101	104	113														67.1667	106
67.3333	108	107	109														67.3333	108
67.5	109	109	111														67.5	109.667
67.6667	108	111	111														67.6667	110
67.8333	105	111	116														67.8333	110.667
68	104	108	114														68	108.667
68.1667	108	111	110														68.1667	109.667
68.3333	105	109	112														68.3333	108.667
68.5	103	105	114														68.5	107.333
68.6667	108	110	110														68.6667	109.333
68.8333	103	105	115														68.8333	107.667
69	103	107	117														69	109
69.1667	102	108	111														69.1667	107
69.3333	105	108	114														69.3333	109
69.5	104	111	113														69.5	109.333
69.6667	105	110	111														69.6667	108.667
69.8333	109	105	111														69.8333	108.333
70	106	104	107														70	105.667
70.1667	105	104	114														70.1667	107.667
70.3333	106	105	115														70.3333	108.667
70.5	112	109	114														70.5	111.667
70.6667	109	106	119														70.6667	111.333
70.8333	108	110	117														70.8333	111.667
71	102	112	115														71	109.667
71.1667	103	106	112														71.1667	107
71.3333	106	107	116														71.3333	109.667
71.5	108	108	115														71.5	110.333
71.6667	108	107	110														71.6667	108.333
71.8333	106	109	111														71.8333	108.667
72	108	108	115														72	110.333
72.1667	103	108	111														72.1667	107.333
72.3333	105	105	114														72.3333	108
72.5	105	107	111														72.5	107.667
72.6667	110	110	111														72.6667	110.333
72.8333	106	107	111														72.8333	108
73	105	111	118														73	111.333
73.1667	103	107	111														73.1667	107
73.3333	109	107	115														73.3333	110.333
73.5	108	107	113														73.5	109.333
73.6667	107	105	110														73.6667	107.333
73.8333	107	105	110														73.8333	107.333
74	109	103	116														74	109.333
74.1667	109	111	116														74.1667	112
74.3333	110	104	113														74.3333	109
74.5	102	104	116														74.5	107.333
74.6667	105	107	111														74.6667	107.667
74.8333	105	106	115														74.8333	108.667
75	107	110	114														75	110.333
75.1667	104	107	112														75.1667	107.667
75.3333	105	108	113														75.3333	108.667
75.5	108	110	115														75.5	111
75.6667	104	103	113														75.6667	106.667
75.8333	107	110	110														75.8333	109
76	111	105	109														76	108.333
76.1667	107	104	112														76.1667	107.667
76.3333	104	109	113														76.3333	108.667
76.5	107	106	114														76.5	109
76.6667	105	107	117														76.6667	109.667
76.8333	106	106	113														76.8333	108.333
77	106	109	118														77	111
77.1667	106	105	116														77.1667	109
77.3333	104	106	113														77.3333	107.667
77.5	106	103	109														77.5	106
77.6667	109	103	111														77.6667	107.667
77.8333	109	109	115														77.8333	111
78	105	106	108														78	106.333
78.1667	105	109	112														78.1667	108.667
78.3333	106	106	114														78.3333	108.667
78.5	101	107	112														78.5	106.667
78.6667	103	105	109														78.6667	105.667
78.8333	106	109	111														78.8333	108.667
79	105	106	112														79	107.667
79.1667	106	107	115														79.1667	109.333
79.3333	102	108	110														79.3333	106.667
79.5	109	108	112														79.5	109.667
79.6667	108	108	110														79.6667	108.667
79.8333	105	107	112														79.8333	108
80	100	107	114														80	107
80.1667	104	108	112														80.1667	108
80.3333	105	106	116														80.3333	109
80.5	103	106	110														80.5	106.333
80.6667	105	104	114														80.6667	107.667
80.8333	106	103	112														80.8333	107
81	110	105	115														81	110
81.1667	106	102	110														81.1667	106
81.3333	107	110	114														81.3333	110.333
81.5	107	113	112														81.5	110.667
81.6667	107	107	115														81.6667	109.667
81.8333	104	111	116														81.8333	110.333
82	108	104	114														82	108.667
82.1667	104	104	115														82.1667	107.667
82.3333	106	102	108														82.3333	105.333
82.5	105	106	114														82.5	108.333
82.6667	105	110	115														82.6667	110
82.8333	101	109	114														82.8333	108
83	106	105	111														83	107.333
83.1667	103	105	112														83.1667	106.667
83.3333	106	108	112														83.3333	108.667
83.5	108	103	112														83.5	107.667
83.6667	110	108	114														83.6667	110.667
83.8333	103	108	113														83.8333	108
84	104	106	112														84	107.333
84.1667	107	106	112														84.1667	108.333
84.3333	105	109	117														84.3333	110.333
84.5	108	107	118														84.5	111
84.6667	102	105	111														84.6667	106
84.8333	105	107	109														84.8333	107
85	106	107	111														85	108
85.1667	104	106	114														85.1667	108
85.3333	103	107	112														85.3333	107.333
85.5	106	106	113														85.5	108.333
85.6667	107	113	114														85.6667	111.333
85.8333	106	104	107														85.8333	105.667
86	108	104	116														86	109.333
86.1667	109	105	110														86.1667	108
86.3333	103	104	113														86.3333	106.667
86.5	108	112	116														86.5	112
86.6667	108	107	114														86.6667	109.667
86.8333	109	107	114														86.8333	110
87	108	105	115														87	109.333
87.1667	104	107	109														87.1667	106.667
87.3333	103	103	115														87.3333	107
87.5	107	102	109														87.5	106
87.6667	105	111	117														87.6667	111
87.8333	106	107	113														87.8333	108.667
88	102	110	113														88	108.333
88.1667	102	110	111														88.1667	107.667
88.3333	109	111	117														88.3333	112.333
88.5	110	111	115														88.5	112
88.6667	107	109	111														88.6667	109
88.8333	108	107	109														88.8333	108
89	108	106	114														89	109.333
89.1667	107	106	108														89.1667	107
89.3333	107	106	111														89.3333	108
89.5	103	108	112														89.5	107.667
89.6667	103	106	110														89.6667	106.333
89.8333	107	108	114														89.8333	109.667
90	108	105	111														90	108
90.1667	109	106	113														90.1667	109.333
90.3333	106	105	116														90.3333	109
90.5	106	106	114														90.5	108.667
90.6667	106	110	113														90.6667	109.667
90.8333	105	108	110														90.8333	107.667
91	104	108	113														91	108.333
91.1667	105	106	114														91.1667	108.333
91.3333	104	107	114														91.3333	108.333
91.5	105	108	112														91.5	108.333
91.6667	107	112	113														91.6667	110.667
91.8333	110	104	112														91.8333	108.667
92	103	109	111														92	107.667
92.1667	105	109	113														92.1667	109
92.3333	106	108	113														92.3333	109
92.5	110	109	111														92.5	110
92.6667	106	107	118														92.6667	110.333
92.8333	104	106	110														92.8333	106.667
93	107	107	110														93	108
93.1667	107	107	112														93.1667	108.667
93.3333	106	107	113														93.3333	108.667
93.5	109	109	115														93.5	111
93.6667	107	107	114														93.6667	109.333
93.8333	106	110	109														93.8333	108.333
94	105	110	115														94	110
94.1667	108	108	112														94.1667	109.333
94.3333	104	106	117														94.3333	109
94.5	106	104	111														94.5	107
94.6667	102	105	117														94.6667	108
94.8333	108	109	110														94.8333	109
95	106	109	110														95	108.333
95.1667	108	109	116														95.1667	111
95.3333	109	110	105														95.3333	108
95.5	103	107	114														95.5	108
95.6667	108	105	113														95.6667	108.667
95.8333	107	107	111														95.8333	108.333
96	105	108	115														96	109.333
96.1667	105	108	111														96.1667	108
96.3333	104	110	110														96.3333	108
96.5	109	109	109														96.5	109
96.6667	105	111	110														96.6667	108.667
96.8333	108	108	113														96.8333	109.667
97	102	106	115														97	107.667
97.1667	103	108	114														97.1667	108.333
97.3333	107	109	117														97.3333	111
97.5	109	106	114														97.5	109.667
97.6667	104	104	119														97.6667	109
97.8333	102	109	112														97.8333	107.667
98	109	105	110														98	108
98.1667	106	111	114														98.1667	110.333
98.3333	102	107	112														98.3333	107
98.5	104	108	118														98.5	110
98.6667	107	107	115														98.6667	109.667
98.8333	110	109	111														98.8333	110
99	104	110	113														99	109
99.1667	106	105	113														99.1667	108
99.3333	106	107	108														99.3333	107
99.5	110	110	110														99.5	110
99.6667	106	106	113														99.6667	108.333
99.8333	102	109	110														99.8333	107
100	106	106	115														100	109
100.167	107	110	109														100.167	108.667
100.333	108	110	114														100.333	110.667
100.5	109	104	116														100.5	109.667
100.667	110	110	116														100.667	112
100.833	106	110	113														100.833	109.667
101	103	106	108														101	105.667
101.167	103	105	116														101.167	108
101.333	105	105	112														101.333	107.333
101.5	104	111	111														101.5	108.667
101.667	104	109	114														101.667	109
101.833	110	103	114														101.833	109
102	106	105	112														102	107.667
102.167	106	105	114														102.167	108.333
102.333	108	106	115														102.333	109.667
102.5	106	108	114														102.5	109.333
102.667	105	107	107														102.667	106.333
102.833	102	104	115														102.833	107
103	109	106	112														103	109
103.167	106	105	109														103.167	106.667
103.333	107	112	109														103.333	109.333
103.5	109	112	111														103.5	110.667
103.667	103	109	111														103.667	107.667
103.833	104	105	108														103.833	105.667
104	108	106	115														104	109.667
104.167	106	108	115														104.167	109.667
104.333	101	108	113														104.333	107.333
104.5	104	111	114														104.5	109.667
104.667	103	107	108														104.667	106
104.833	105	108	113														104.833	108.667
105	105	105	115														105	108.333
105.167	106	110	115														105.167	110.333
105.333	107	106	107														105.333	106.667
105.5	105	106	113														105.5	108
105.667	109	106	119														105.667	111.333
105.833	109	109	115														105.833	111
106	101	104	116														106	107
106.167	108	108	112														106.167	109.333
106.333	111	109	114														106.333	111.333
106.5	105	107	114														106.5	108.667
106.667	110	106	108														106.667	108
106.833	107	110	112														106.833	109.667
107	107	104	115														107	108.667
107.167	110	107	114														107.167	110.333
107.333	104	113	114														107.333	110.333
107.5	109	105	115														107.5	109.667
107.667	108	110	110														107.667	109.333
107.833	101	109	113														107.833	107.667
108	105	103	114														108	107.333
108.167	105	108	116														108.167	109.667
108.333	104	107	111														108.333	107.333
108.5	104	109	113														108.5	108.667
108.667	108	111	112														108.667	110.333
108.833	108	109	114														108.833	110.333
109	102	110	109														109	107
109.167	108	110	112														109.167	110
109.333	106	109	113														109.333	109.333
109.5	102	108	111														109.5	107
109.667	109	110	112														109.667	110.333
109.833	107	106	114														109.833	109
110	106	108	115														110	109.667
110.167	108	110	116														110.167	111.333
110.333	106	110	116														110.333	110.667
110.5	105	107	115														110.5	109
110.667	106	107	112														110.667	108.333
110.833	104	109	112														110.833	108.333
111	104	108	114														111	108.667
111.167	105	107	116														111.167	109.333
111.333	105	108	113														111.333	108.667
111.5	107	109	116														111.5	110.667
111.667	105	111	112														111.667	109.333
111.833	105	106	118														111.833	109.667
112	105	107	114														112	108.667
112.167	108	107	114														112.167	109.667
112.333	110	109	115														112.333	111.333
112.5	106	109	110														112.5	108.333
112.667	105	108	114														112.667	109
112.833	106	107	112														112.833	108.333
113	105	105	112														113	107.333
113.167	107	111	113														113.167	110.333
113.333	105	107	115														113.333	109
113.5	104	111	115														113.5	110
113.667	103	110	114														113.667	109
113.833	105	108	111														113.833	108
114	105	109	111														114	108.333
114.167	102	108	112														114.167	107.333
114.333	106	108	115														114.333	109.667
114.5	107	109	117														114.5	111
114.667	107	106	112														114.667	108.333
114.833	105	109	117														114.833	110.333
115	104	108	114														115	108.667
115.167	106	109	115														115.167	110
115.333	104	113	113														115.333	110
115.5	106	107	113														115.5	108.667
115.667	107	106	115														115.667	109.333
115.833	107	109	116														115.833	110.667
116	105	108	113														116	108.667
116.167	102	108	113														116.167	107.667
116.333	106	110	111														116.333	109
116.5	110	109	115														116.5	111.333
116.667	105	108	112														116.667	108.333
116.833	108	109	114														116.833	110.333
117	108	106	114														117	109.333
117.167	104	108	113														117.167	108.333
117.333	105	106	117														117.333	109.333
117.5	108	108	116														117.5	110.667
117.667	107	106	113														117.667	108.667
117.833	105	106	113														117.833	108
118	107	107	113														118	109
118.167	107	106	113														118.167	108.667
118.333	106	107	114														118.333	109
118.5	107	109	114														118.5	110
118.667	109	107	114														118.667	110
