# Supplementary material for: Cross-talk between individual phenol-soluble modulins in Staphylococcus aureus biofilm enables rapid and efficient amyloid formation
Source: eLife journal article supplement (doi:10.7554/elife.59776), 2020-12-01
Supplement: supp [file elife_poa_e59776_Figure_1_figure_supplement_1.pdf › elife_poa_e59776_Figure_1_figure_supplement_1.pdf]

|                 |                                              |
|-----------------|----------------------------------------------|
| PSM $\alpha$ 1  | MGIIAGIIKVIKSLIEQFTGK                        |
| PSM $\alpha$ 2  | MGIIAGIIKFIKGLIEKFTGK                        |
| PSM $\alpha$ 3  | MEFVAKLFKFFKDLLGKFLGNN                       |
| PSM $\alpha$ 4  | MAIVGTIIKIIKAIIDIFAK                         |
| PSM $\beta$ 1   | MEGLFNAIKDTVTAAINNDGAKLGTSIVSIVENGVGLLGKLFGF |
| PSM $\beta$ 2   | MTGLAEAIANTVQAAQQHDSVKLGTSIVDIVANGVGLLGKLFGF |
| $\delta$ -toxin | MAQDIISTIG DLVKWIIDTVNKFTKK                  |

**Figure 1 - Supplement 1: PSM peptide sequences.** The peptide sequence of the seven different PSMs from *S. aureus*.
