# Supplementary material for: Cross-talk between individual phenol-soluble modulins in Staphylococcus aureus biofilm enables rapid and efficient amyloid formation
Source: eLife journal article supplement (doi:10.7554/elife.59776), 2020-12-01
Supplement: supp [file elife_poa_e59776_Figure_1_figure_supplement_2.pdf › elife_poa_e59776_Figure_1_figure_supplement_2.pdf]

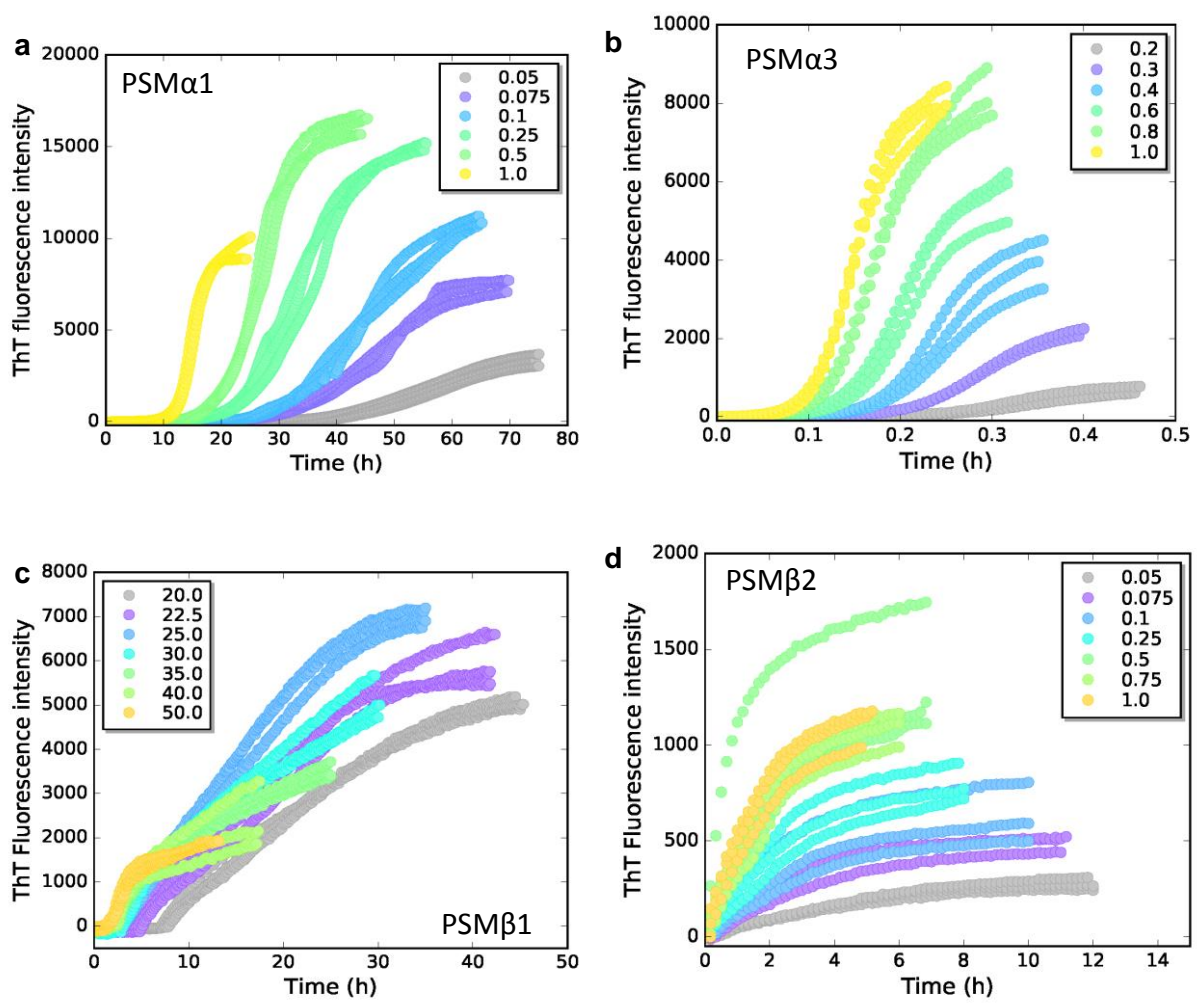

**Figure 1 - Supplement 2: Experimental kinetic raw data.** Raw ThT fluorescence data for the aggregation of the PSMs peptides under quiescent conditions at 37 °C. a) Aggregation of PSM $\alpha$ 1 (0.05-1.0 mg/mL). (b) Aggregation of PSM $\alpha$ 3 (0.2-1.0 mg/mL). (c) Aggregation of PSM $\beta$ 1 (20-50  $\mu$ g/mL). (d) Aggregation of PSM $\beta$ 2 (0.05-1.0 mg/mL).
