# Supplementary material for: Cross-talk between individual phenol-soluble modulins in Staphylococcus aureus biofilm enables rapid and efficient amyloid formation
Source: eLife journal article supplement (doi:10.7554/elife.59776), 2020-12-01
Supplement: supp [file elife_poa_e59776_Figure_1_figure_supplement_3.pdf › elife_poa_e59776_Figure_1_figure_supplement_3.pdf]

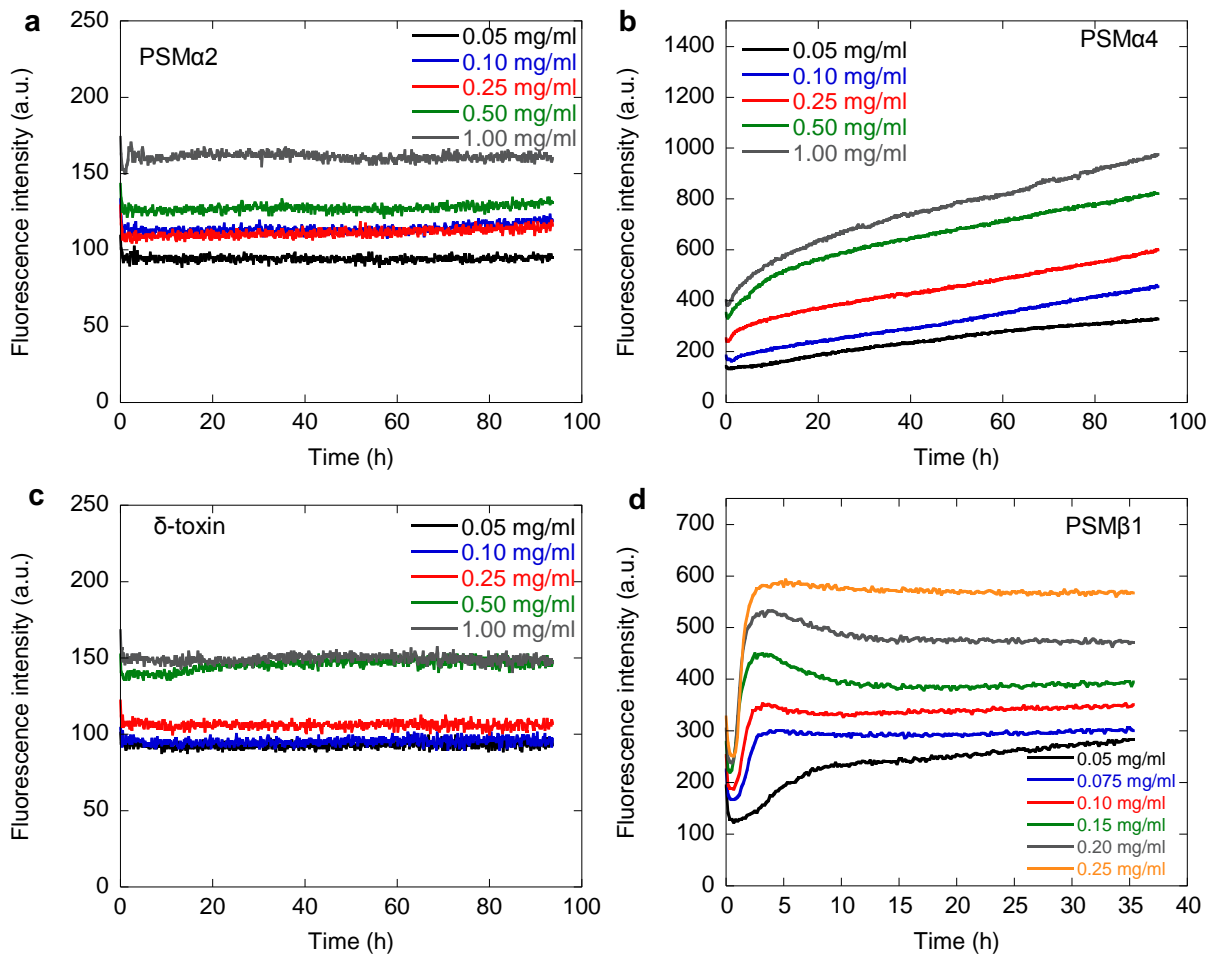

**Figure 1 - Supplement 3: Kinetic data for PSMα2, PSMα4, δ-toxin and PSMβ1.** Experimental kinetic data for the aggregation of the PSMs peptides under quiescent conditions. Aggregation of PSMs peptides (a) PSMα2, (b) PSMα4, (c) δ-toxin and (d) PSMβ1 from monomeric samples (0.05 mg/ml to 0.25 mg/ml) is measured by ThT fluorescence at 37°C every 10 min. Three repeats were carried out at each condition. At higher concentrations of PSMβ1 the lag-time becomes independent of the monomer concentration indicating some sort of saturation effect.
