# Supplementary material for: Cross-talk between individual phenol-soluble modulins in Staphylococcus aureus biofilm enables rapid and efficient amyloid formation
Source: eLife journal article supplement (doi:10.7554/elife.59776), 2020-12-01
Supplement: supp [file elife_poa_e59776_Figure_1_figure_supplement_4.pdf › elife_poa_e59776_Figure_1_figure_supplement_4.pdf]

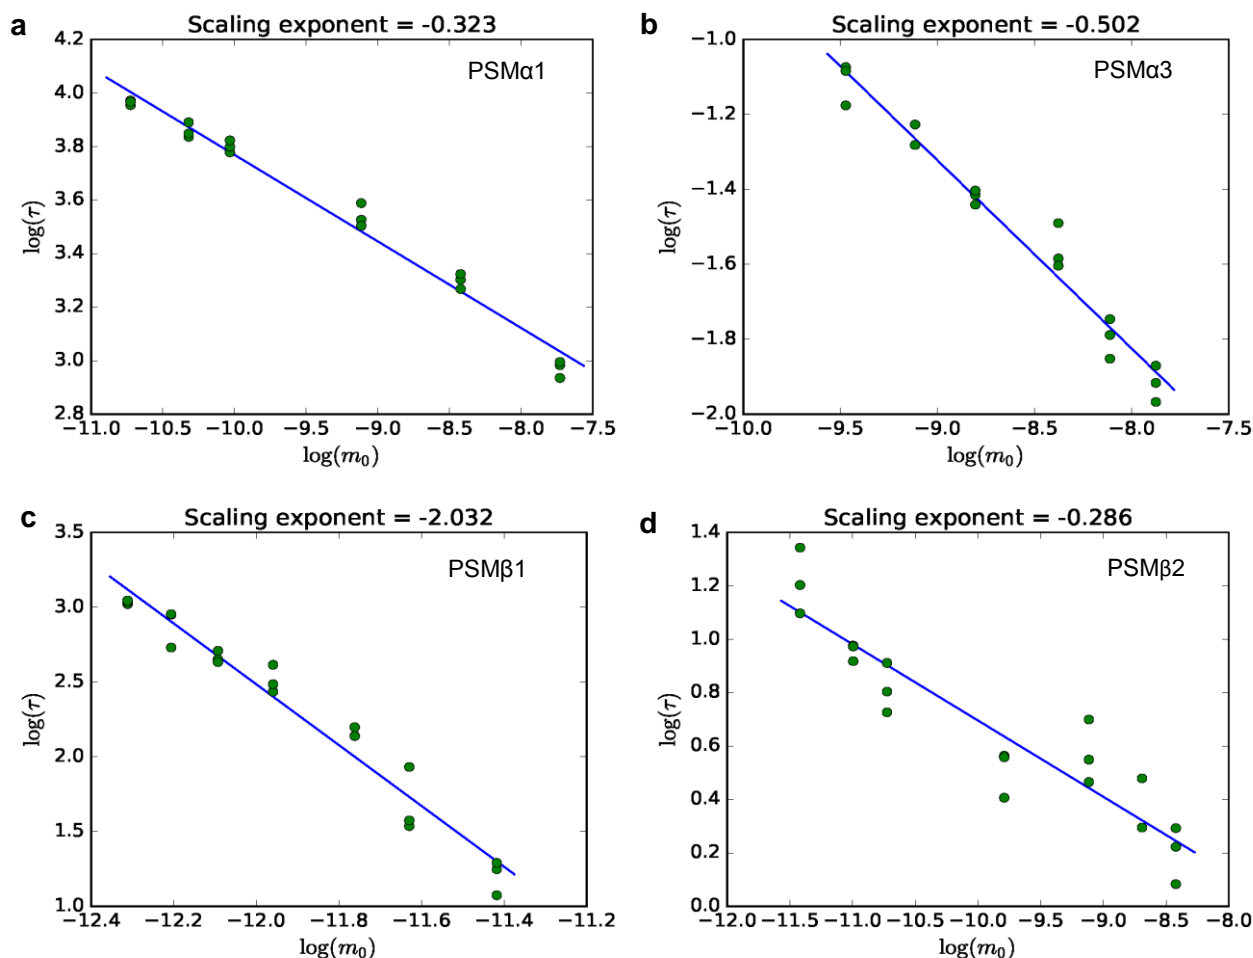

**Figure 1 - Supplement 4: Half-time plots for PSM $\alpha$ 1, PSM $\alpha$ 3, PSM $\beta$ 1 and PSM $\beta$ 2.** The half times of fibril formation as a function of initial monomer concentration on double logarithmic axes. The slope of the fitted line gives the scaling exponent ( $\gamma$ ), obtained from three repeats of the aggregation experiments for each peptide. (a) PSM $\alpha$ 1, (b) PSM $\alpha$ 3, (c) PSM $\beta$ 1, and (d) PSM $\beta$ 2. The straight line in all four plots indicates that the dominant mechanism of fibril multiplication is the same for all monomer concentrations for the individual peptides studied here.
