# Supplementary material for: Cross-talk between individual phenol-soluble modulins in Staphylococcus aureus biofilm enables rapid and efficient amyloid formation
Source: eLife journal article supplement (doi:10.7554/elife.59776), 2020-12-01
Supplement: supp [file elife_poa_e59776_Figure_1_figure_supplement_5.pdf › elife_poa_e59776_Figure_1_figure_supplement_5.pdf]

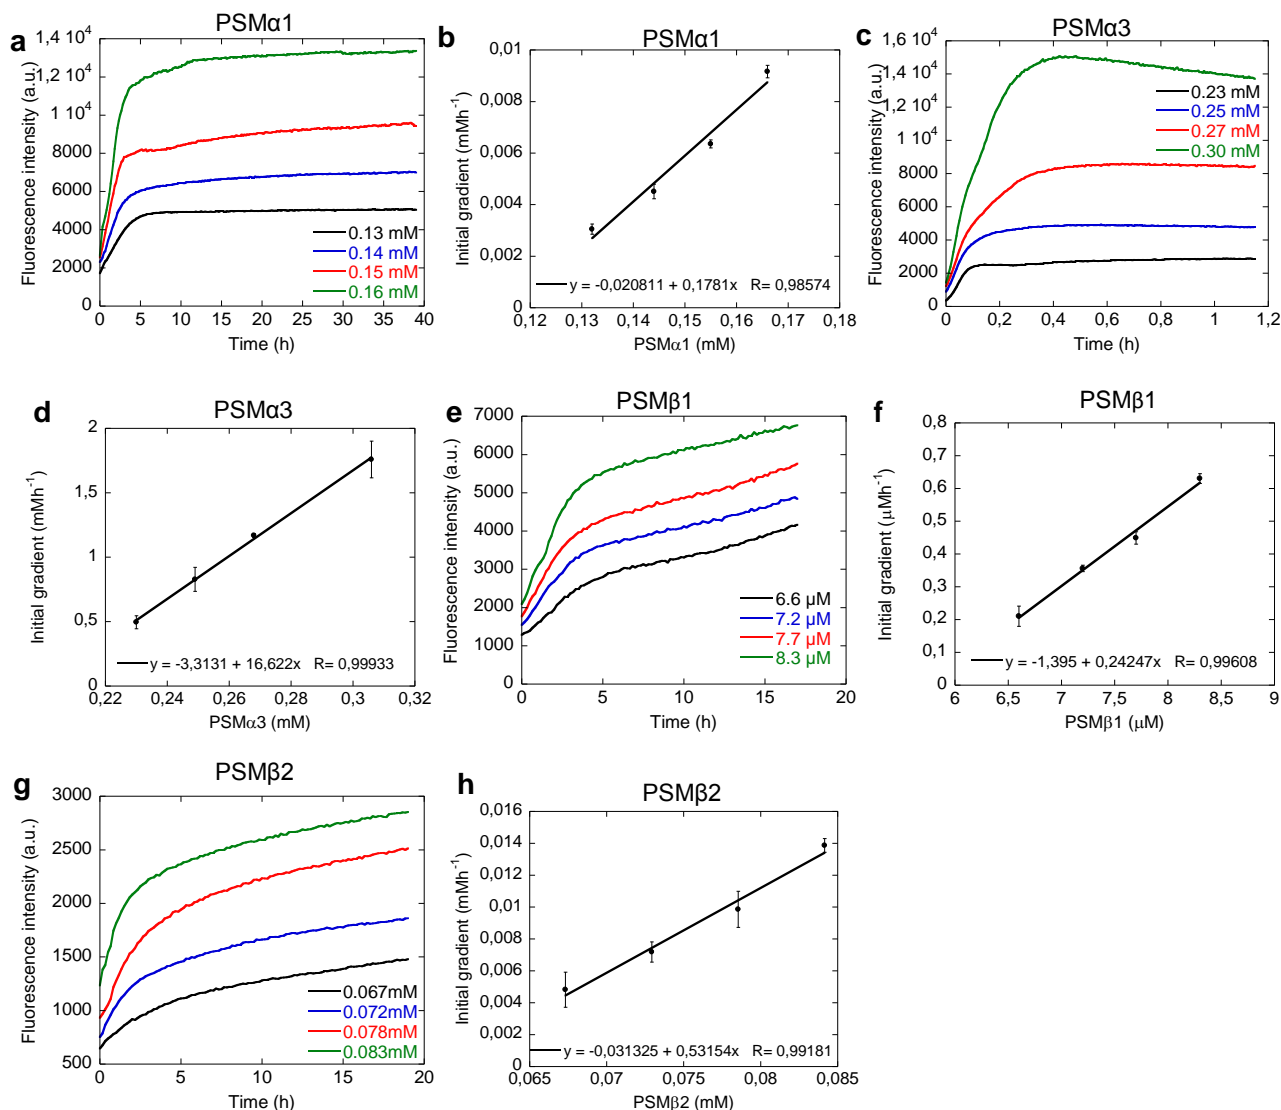

**Figure 1 - Supplement 5: Seeding with high amounts of seeds.** Seeding of PSM peptides with 20-50 % preformed fibrils seeds (in monomeric equivalents) at different monomeric concentration. (a) Changes in ThT fluorescence when monomeric PSMα1 at fixed concentration (0.25 mg/mL) was incubated in presence of high concentrations of preformed fibrils from the PSMα1 under quiescent conditions at 37°C. (b) Initial gradient of the ThT fluorescence curves of PSMα1 used to estimate the elongation rates. The initial gradient (first 120 min) is plotted against the free monomer concentration. A straight line was fitted to these points, with the slope proportional to the number of seed fibrils and the elongation rate constant. (c) Changes in ThT fluorescence when monomeric PSMα3 at fixed concentration (0.5 mg/mL) was incubated in presence of high concentrations of preformed fibrils from the PSMα3 under quiescent conditions at 37°C. (d) Initial gradient of the ThT fluorescence curves of PSMα3 used to estimate the elongation rates. The initial gradient (first 2 min) is plotted against the free monomer concentration. A straight line was fitted to these points, with the slope proportional to the number of seed fibrils and the elongation rate constant. (e) Changes in ThT fluorescence when monomeric PSMβ1 at fixed concentration (0.025 mg/mL) was incubated in presence of high concentrations of preformed fibrils from the PSMβ1 under quiescent

conditions at 37°C. (f) Initial gradient of the ThT fluorescence curves of PSM $\beta$ 1 used to estimate the elongation rates. The initial gradient (first 120 min) is plotted against the free monomer concentration. A straight line was fitted to these points, with the slope proportional to the number of seed fibrils and the elongation rate constant. (g) Changes in ThT fluorescence when monomeric PSM $\beta$ 2 at fixed concentration (0.25 mg/mL) was incubated in presence of high concentrations of preformed fibrils the PSM $\beta$ 2 under quiescent conditions at 37°C. (b) Initial gradient of the ThT fluorescence curves of PSM $\beta$ 2 used to estimate the elongation rates. The initial gradient (first 120 min) is plotted against the free monomer concentration. A straight line was fitted to these points, with the slope proportional to the number of seed fibrils and the elongation rate constant.
