# Supplementary material for: Cross-talk between individual phenol-soluble modulins in Staphylococcus aureus biofilm enables rapid and efficient amyloid formation
Source: eLife journal article supplement (doi:10.7554/elife.59776), 2020-12-01
Supplement: supp [file elife_poa_e59776_Figure_2_figure_supplement_1.pdf › elife_poa_e59776_Figure_2_figure_supplement_1.pdf]

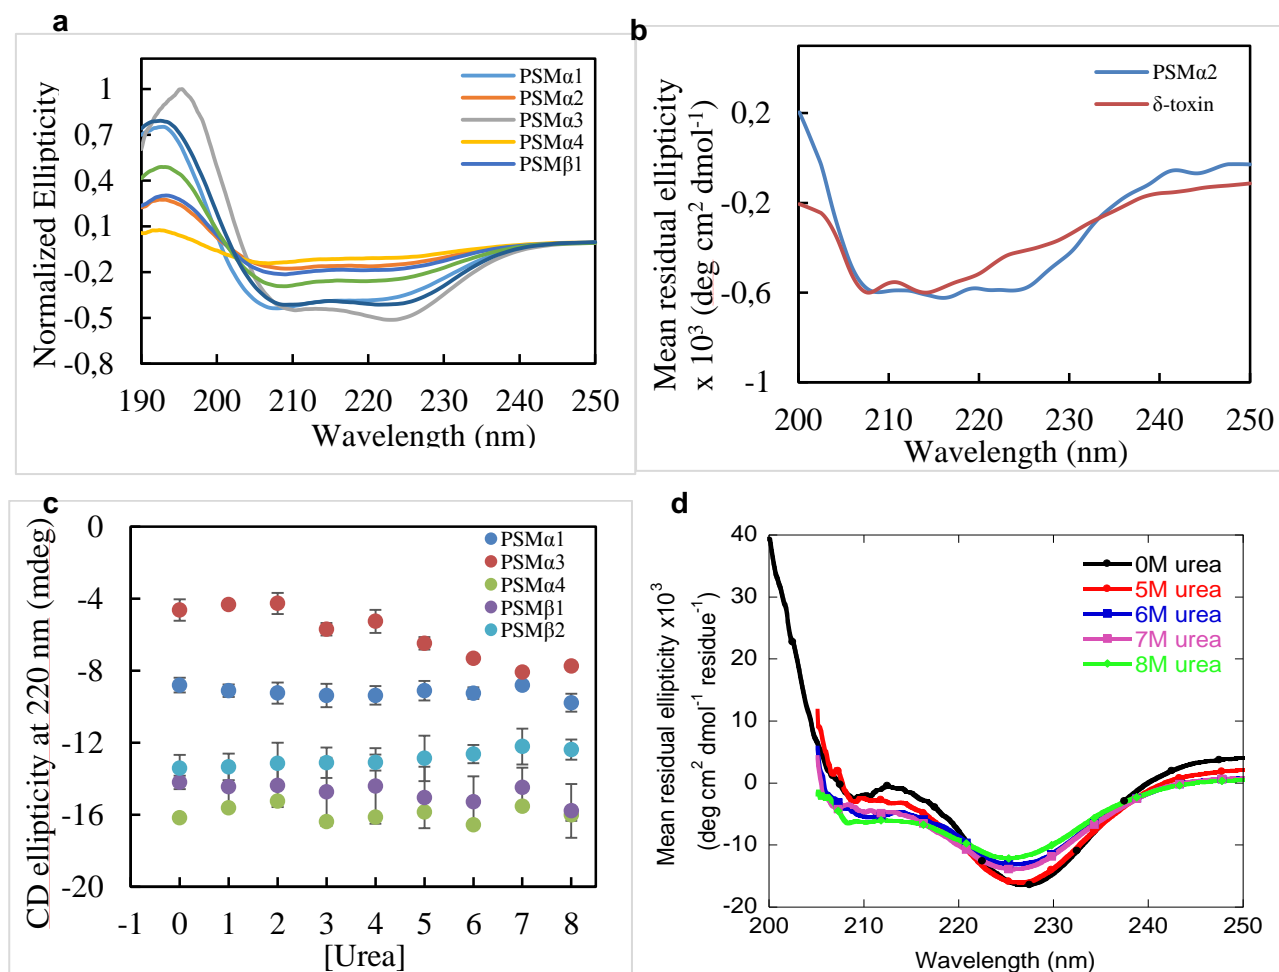

**Figure 2 - Supplement 1: CD spectra of monomeric PSM peptides and urea denaturation of PSM fibrils.** CD spectra (Jasco) of monomeric PSM peptides and of PSM peptides that do not aggregate. (a) CD spectra of monomeric PSMs peptides (0.25 mg/ml) measured at 25 °C followed by 0 h of incubation period. (b) Far UV-CD spectra of PSM $\alpha$ 2 and  $\delta$ -toxin after 7 days incubation at 37 °C display  $\alpha$ -helical character consistent with the lack of aggregation. (c) Analysis of the dissociation of PSMs fibrils collected from plate reader experiments after incubation in presence of various concentrations of urea (0-8M). (d) Far UV-CD (Jasco) spectra of PSM $\alpha$ 3 fibrils (1 h) after incubation in the absence and presence of high concentrations of urea (0 and 5-8 M urea).
