# Supplementary material for: Cross-talk between individual phenol-soluble modulins in Staphylococcus aureus biofilm enables rapid and efficient amyloid formation
Source: eLife journal article supplement (doi:10.7554/elife.59776), 2020-12-01
Supplement: supp [file elife_poa_e59776_Figure_2_figure_supplement_2.pdf › elife_poa_e59776_Figure_2_figure_supplement_2.pdf]

**Figure 2 - Supplement 2: Structural contribution from deconvolution of CD spectra.**

Percentage contribution of various structural components for the fibrils of PSM variants based on deconvolution of SRCD spectra using the DichroWeb server using the reference data setSP175 for the Selecon3, Contin and CDSSTR analysis programs.

| Peptide        | % $\alpha$ -helix | % $\beta$ -sheet | % Turns | % Unordered |
|----------------|-------------------|------------------|---------|-------------|
| PSM $\alpha$ 1 | 16.1              | 33.1             | 10.5    | 38.5        |
| PSM $\alpha$ 3 | 69.3              | 11.3             | 6.1     | 13.2        |
| PSM $\alpha$ 4 | 23.4              | 31.0             | 10.1    | 35.4        |
| PSM $\beta$ 1  | 34.5              | 23.8             | 10.1    | 33.0        |
| PSM $\beta$ 2  | 39.5              | 16.4             | 10.6    | 34.7        |
