# Supplementary material for: Cross-talk between individual phenol-soluble modulins in Staphylococcus aureus biofilm enables rapid and efficient amyloid formation
Source: eLife journal article supplement (doi:10.7554/elife.59776), 2020-12-01
Supplement: supp [file elife_poa_e59776_Figure_2_figure_supplement_3.pdf › elife_poa_e59776_Figure_2_figure_supplement_3.pdf]

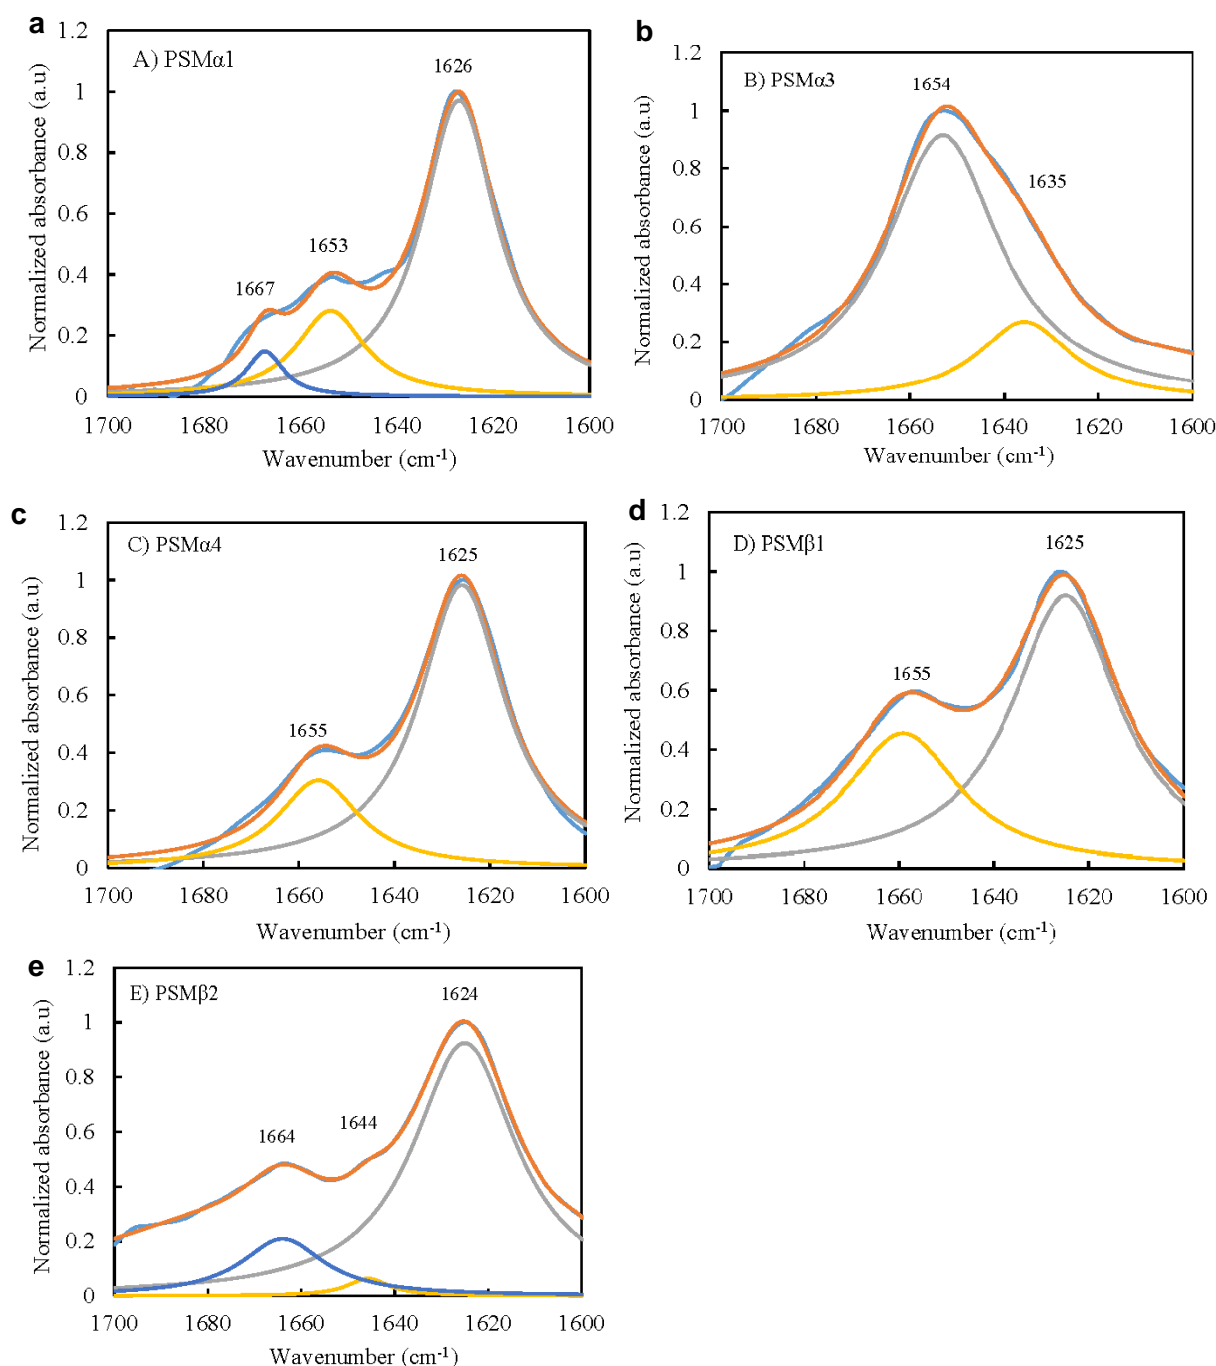

**Figure 2 - Supplement 3: Deconvolution of FTIR spectra.** FTIR analysis of the secondary structure of PSMs peptides. The data were processed by baseline correction and interfering signals from  $\text{H}_2\text{O}$  and  $\text{CO}_2$  were removed using the atmospheric compensation filter. Further, peak positions were assigned where the second order derivative had local minima and the intensity was modeled by Gaussian curve fitting using the OPUS 5.5 software. (a) FTIR spectra and second order derivative of the spectra of PSM $\alpha$ 1 at 0.5 mg/mL. (b) FTIR spectra and second order derivative of the spectra of PSM $\alpha$ 3 at 0.5 mg/mL. (c) FTIR spectra and second order derivative of the spectra of PSM $\alpha$ 4 at 0.5 mg/mL. (d) FTIR spectra and second order derivative of the spectra of PSM $\beta$ 1 at

0.025 mg/mL. (e) FTIR spectra and second order derivative of the spectra of PSM $\beta$ 2 at 0.25 mg/mL.
