# Supplementary material for: Cross-talk between individual phenol-soluble modulins in Staphylococcus aureus biofilm enables rapid and efficient amyloid formation
Source: eLife journal article supplement (doi:10.7554/elife.59776), 2020-12-01
Supplement: supp [file elife_poa_e59776_Figure_2_figure_supplement_4.pdf › elife_poa_e59776_Figure_2_figure_supplement_4.pdf]

**Figure 2 - Supplement 4: Structural contribution to FTIR spectra.** Percentage contribution of various structural components for the fibrils of PSM variants based on deconvolution of FTIR spectra along with peak position.

| Peptide        | Peak position   | % $\beta$ -sheet | % $\alpha$ -helix | % $\beta$ turns |
|----------------|-----------------|------------------|-------------------|-----------------|
| PSM $\alpha$ 1 | 1626, 1653,1667 | 68.58            | 26.32             | 9.10            |
| PSM $\alpha$ 3 | 1635, 1654      | 43.94            | 56.06             | -               |
| PSM $\alpha$ 4 | 1625, 1655      | 69.12            | 30.88             | -               |
| PSM $\beta$ 1  | 1625, 1656      | 66.80            | 33.2              | -               |
| PSM $\beta$ 2  | 1624,1644, 1664 | 66.22            | 20.05             | 13.73           |
