# Supplementary material for: Cross-talk between individual phenol-soluble modulins in Staphylococcus aureus biofilm enables rapid and efficient amyloid formation
Source: eLife journal article supplement (doi:10.7554/elife.59776), 2020-12-01
Supplement: supp [file elife_poa_e59776_Figure_4_figure_supplement_1.pdf › elife_poa_e59776_Figure_4_figure_supplement_1.pdf]

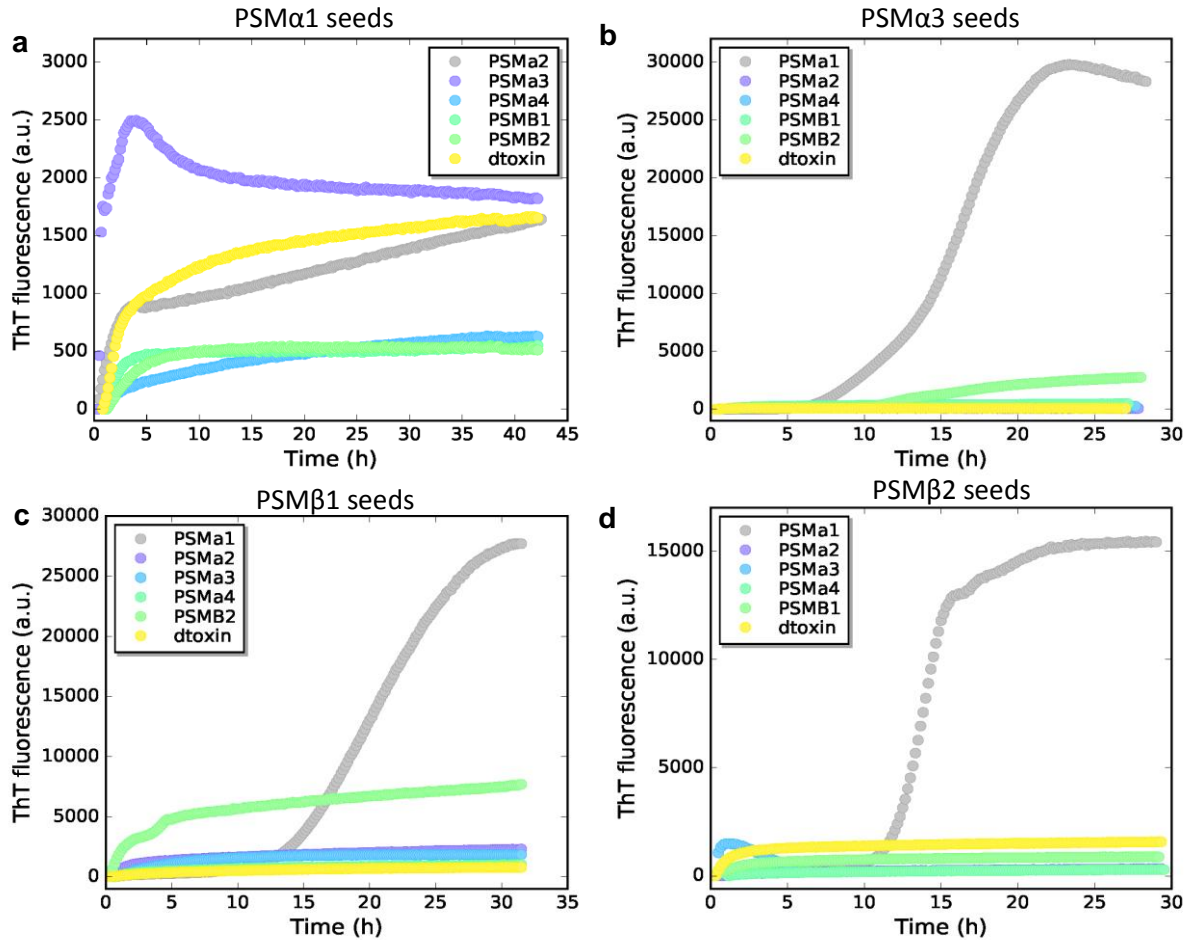

**Figure 4 - Supplement 1: Cross-seeding of PSM peptides based on seed type.** (a) Aggregation of PSM $\alpha$ 2, PSM $\alpha$ 3, PSM $\alpha$ 4, PSM $\beta$ 1, PSM $\beta$ 2 and  $\delta$ -toxin (0.25 mg/mL) in the presence of 20 % preformed PSM $\alpha$ 1 seeds. (b) Aggregation of PSM $\alpha$ 1, PSM $\alpha$ 2, PSM $\alpha$ 4, PSM $\beta$ 1, PSM $\beta$ 2 and  $\delta$ -toxin (0.25 mg/mL) in the presence of 20 % preformed PSM $\alpha$ 3 seeds. (c) Aggregation of PSM $\alpha$ 1, PSM $\alpha$ 2, PSM $\alpha$ 3, PSM $\alpha$ 4, PSM $\beta$ 2 and  $\delta$ -toxin (0.25 mg/mL) in the presence of 20 % preformed PSM $\beta$ 1 seeds. (d) Aggregation of PSM $\alpha$ 1, PSM $\alpha$ 2, PSM $\alpha$ 3, PSM $\alpha$ 4, PSM $\beta$ 1, and  $\delta$ -toxin (0.25 mg/mL) in the presence of 20 % preformed PSM $\beta$ 2 seeds.
