# Supplementary material for: Cross-talk between individual phenol-soluble modulins in Staphylococcus aureus biofilm enables rapid and efficient amyloid formation
Source: eLife journal article supplement (doi:10.7554/elife.59776), 2020-12-01
Supplement: supp [file elife_poa_e59776_Figure_4_figure_supplement_2.pdf › elife_poa_e59776_Figure_4_figure_supplement_2.pdf]

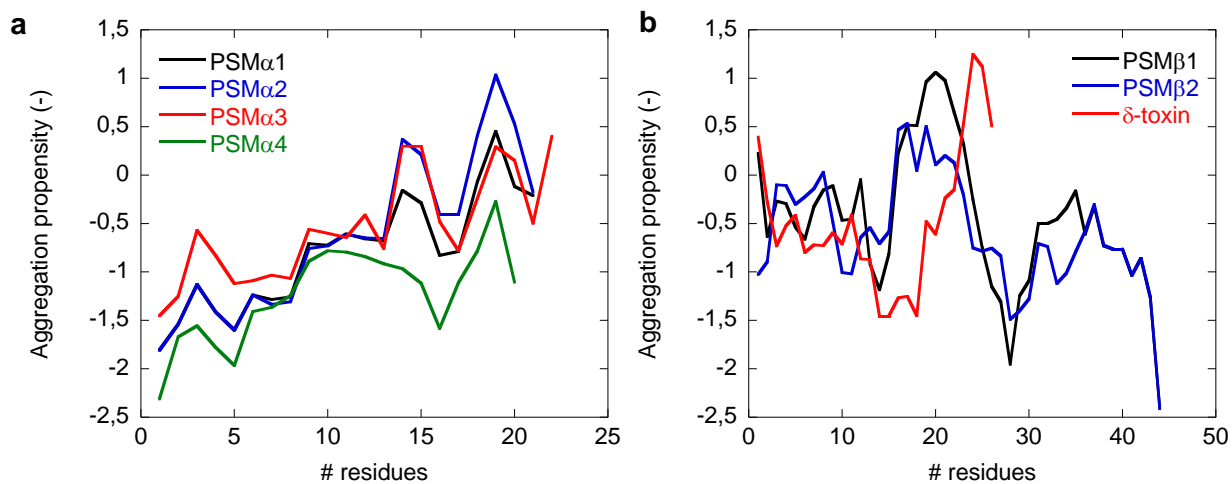

**Figure 4 - Supplement 2: Aggregation propensity profiles of PSM peptides using CamSol.** (a) Aggregation propensities of PSM $\alpha$  group of peptides (PSM $\alpha$ 1, PSM $\alpha$ 2, PSM $\alpha$ 3 and PSM $\alpha$ 4). (b) Aggregation propensity of PSM $\beta$  group of peptides (PSM $\beta$ 1 and PSM $\beta$ 2) along with  $\delta$ -toxin.
