# Supplementary material for: Cross-talk between individual phenol-soluble modulins in Staphylococcus aureus biofilm enables rapid and efficient amyloid formation
Source: eLife journal article supplement (doi:10.7554/elife.59776), 2020-12-01
Supplement: supp [file elife_poa_e59776_Figure_4_figure_supplement_3.pdf › elife_poa_e59776_Figure_4_figure_supplement_3.pdf]

**Figure 4 - Supplement 3: Solubility score of PSM peptides.** Solubility score of different peptides calculated using the Camsol web server (<http://www-mvsoftware.ch.cam.ac.uk/index.php/login>):

| Peptide Name    | Solubility Score |
|-----------------|------------------|
| PSM $\alpha$ 1  | 0.826149         |
| PSM $\alpha$ 2  | 0.883944         |
| PSM $\alpha$ 3  | 1.282062         |
| PSM $\alpha$ 4  | 0.022660         |
| PSM $\beta$ 1   | 1.038055         |
| PSM $\beta$ 2   | 0.907007         |
| $\delta$ -toxin | 1.242128         |
