# Supplementary figures and images for: Cross-talk between individual phenol-soluble modulins in Staphylococcus aureus biofilm enables rapid and efficient amyloid formation
Source: eLife journal article supplement (doi:10.7554/elife.59776), 2020-12-01

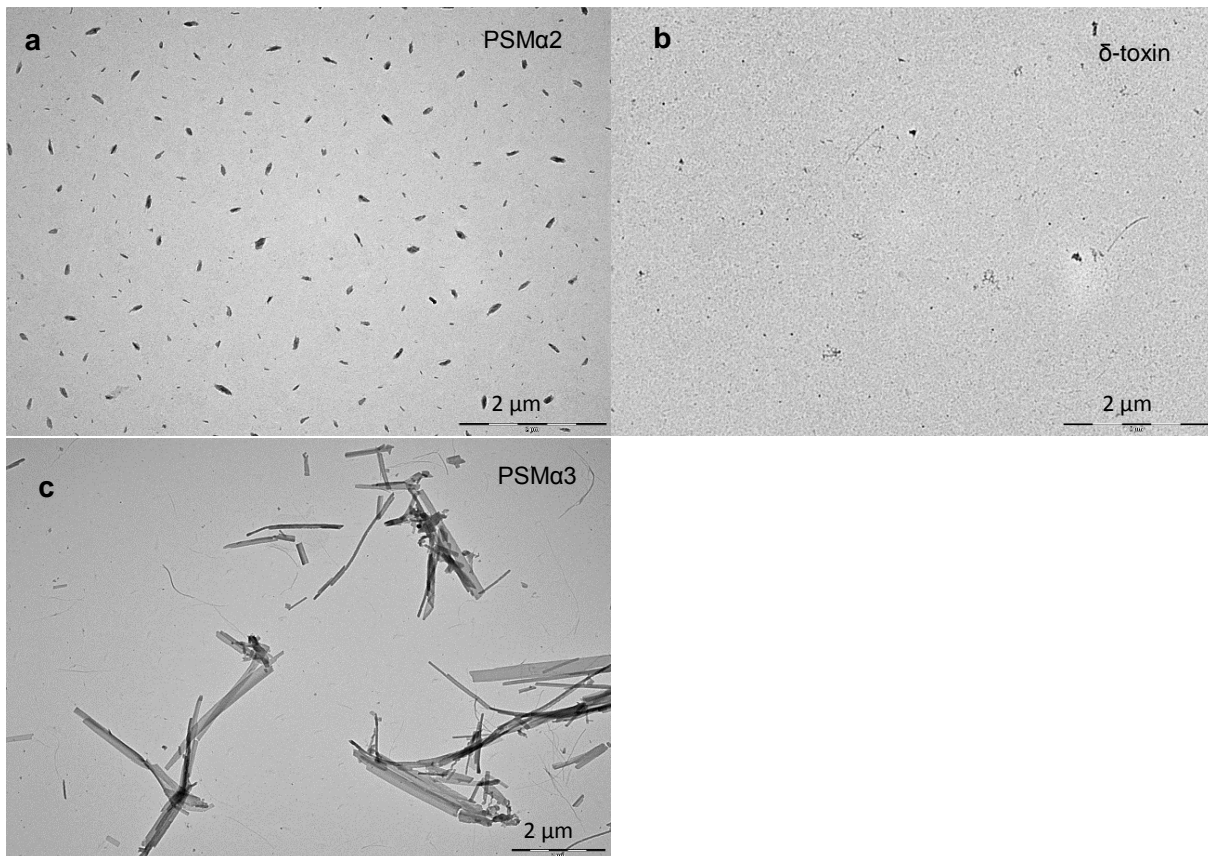

Supplement: supp [file elife_poa_e59776_Figure_3_figure_supplement_1.pdf › elife_poa_e59776_Figure_3_figure_supplement_1.pdf]
